# Supplementary material for: Transcriptomic Evaluation of Pulmonary Fibrosis-Related Genes: Utilization of Transgenic Mice with Modifying p38 Signal in the Lungs
Source: MDPI journal article supplement (doi:10.3390/ijms21186746), 2020-09-14
Supplement: s1 [file s1]

**Supplementary Table S2.** DEGs altered by BLM in MKK6-CA group.

| Name (symbol) | Fold change | FDR p-value correction | CA_PBS_Rep1 - RPKM | CA_PBS_Rep2 - RPKM | CA_PBS_Rep3 - RPKM | CA_BLM_Rep1 - RPKM | CA_BLM_Rep2 - RPKM | CA_BLM_Rep3 - RPKM |
|---------------|-------------|------------------------|--------------------|--------------------|--------------------|--------------------|--------------------|--------------------|
| Ighv14-4      | 296.937     | 0.00566                | 0                  | 0                  | 0                  | 0.78832            | 35.0771            | 0.63956            |
| Gm21541       | 249.304     | 3.2E-06                | 0                  | 0                  | 0                  | 23.3445            | 13.6134            | 19.0943            |
| Stfa2l1       | 120.521     | 0.03546                | 0                  | 0                  | 0                  | 0.26734            | 0.48488            | 13.0137            |
| Mmp10         | 103.451     | 7.9E-07                | 0                  | 0                  | 0                  | 0.89983            | 0.97145            | 0.65182            |
| Vsig4         | 88.6544     | 0.00039                | 0                  | 0                  | 0                  | 0.26104            | 0.76653            | 1.56314            |
| Timp1         | 87.9385     | 5.7E-19                | 0.51429            | 0.86995            | 0.82196            | 47.7369            | 53.5759            | 68.4246            |
| Sprr1a        | 82.8504     | 1.1E-13                | 0                  | 0.19169            | 0                  | 12.4961            | 5.31322            | 19.4035            |
| Iglv1         | 78.8515     | 0.00072                | 7.7088             | 1.18545            | 0.26668            | 15.9934            | 16.6               | 74.2548            |
| Ocstamp       | 76.449      | 4.2E-05                | 0                  | 0                  | 0                  | 0.40858            | 0.20127            | 0.30693            |
| Sectm1b       | 69.8381     | 8.3E-05                | 0                  | 0                  | 0                  | 0.39813            | 0.3129             | 0.34992            |
| Mmp8          | 68.0941     | 1.6E-14                | 0.07533            | 0                  | 0.043              | 4.03924            | 3.42155            | 7.22061            |
| Spp1          | 64.9655     | 8.3E-42                | 3.82421            | 2.76569            | 0.63272            | 229.654            | 291.243            | 239.107            |
| Wfdc12        | 64.1368     | 0.0018                 | 0                  | 0                  | 0                  | 1.99938            | 0.69072            | 3.08971            |
| Dio3          | 55.7593     | 0.00142                | 0                  | 0                  | 0                  | 0.32713            | 0.49443            | 0.33175            |
| Gm5483        | 54.4826     | 0.0222                 | 0                  | 0                  | 0                  | 0.66836            | 0.80813            | 4.51865            |
| Ccl2          | 54.3728     | 1E-10                  | 0.32105            | 0.20365            | 0                  | 4.23073            | 6.4091             | 8.08784            |
| Ifitm6        | 53.1986     | 0.00968                | 0                  | 0                  | 0                  | 0.2446             | 0.5915             | 1.73636            |
| Ptger2        | 49.258      | 0.00147                | 0.719              | 0.67102            | 0.22643            | 2.1481             | 1.99795            | 2.09212            |
| Hist1h3i      | 47.5905     | 0.00136                | 0                  | 0.9398             | 4.82034            | 16.4269            | 9.44275            | 5.09783            |
| Hist1h3h      | 45.6583     | 0.003                  | 6.00028            | 8.83414            | 2.79072            | 22.89              | 17.0946            | 14.019             |
| Pcdhgb2       | 44.431      | 0.00111                | 2.42992            | 2.02204            | 0.82773            | 2.6358             | 2.16776            | 2.29576            |
| Fgf23         | 44.2769     | 0.00222                | 0                  | 0                  | 0                  | 0.39659            | 0.25821            | 0.37126            |
| Wnt10a        | 42.7706     | 0.00179                | 0                  | 0                  | 0                  | 0.2915             | 0.16267            | 0.27288            |
| Arg1          | 42.2017     | 5.7E-13                | 0.18565            | 0.20935            | 0.14129            | 6.22386            | 22.9391            | 10.545             |
| Sh2d1a        | 41.0833     | 0.00363                | 0                  | 0                  | 0                  | 0.23238            | 0.14049            | 0.15711            |
| Gm10718       | 39.1268     | 0.02904                | 0                  | 0                  | 1.07181            | 3.49429            | 2.16166            | 5.93357            |
| Pdyn          | 37.0123     | 0.0054                 | 0                  | 0                  | 0                  | 0.17252            | 0.11589            | 0.25919            |
| Igkv3-5       | 36.1997     | 0.03648                | 0.71731            | 0                  | 0                  | 2.75251            | 18.3924            | 2.54653            |
| Mmp12         | 34.5296     | 2.1E-16                | 0.07573            | 0.26686            | 0.02882            | 11.2102            | 4.75244            | 6.40032            |
| Igkv6-13      | 33.6049     | 0.02294                | 0.25442            | 0                  | 0                  | 16.3399            | 0.74555            | 3.33499            |
| Pde2a_2       | 33.3386     | 0.02796                | 0                  | 0                  | 0                  | 0.23616            | 0                  | 0.40803            |
| Igkv4-57-1    | 33.2412     | 0.0014                 | 0.24487            | 0                  | 0                  | 4.59929            | 9.68718            | 2.20675            |
| E330013P04Rik | 33.0266     | 0.01084                | 0                  | 0                  | 0                  | 0.06503            | 0.13105            | 0.07328            |
| Gpr55         | 32.7229     | 0.00971                | 0.14728            | 0.29065            | 0.02802            | 0.52053            | 0.46755            | 0.22121            |
| Igkv5-48      | 32.6213     | 6.5E-05                | 0.50743            | 0.21459            | 0                  | 3.68932            | 27.1371            | 10.185             |
| Hist1h3b      | 32.2151     | 1.6E-08                | 1.47319            | 0.2492             | 0.50454            | 27.4022            | 11.2242            | 29.5695            |
| Tnc           | 32.1825     | 5.3E-36                | 1.1047             | 1.10331            | 0.59032            | 39.561             | 40.0429            | 38.021             |
| Serpinb9b     | 31.98       | 2.1E-11                | 0.02808            | 0.02375            | 0                  | 1.22486            | 0.84336            | 1.40319            |
| Adamts4       | 31.9667     | 3.5E-34                | 0.03798            | 0.0803             | 0.08671            | 3.52058            | 3.47782            | 4.46484            |
| S100a8        | 31.6914     | 6.9E-07                | 0.26322            | 0.7792             | 0.30049            | 10.0473            | 4.72443            | 72.1334            |
| C430002N11Rik | 31.6827     | 0.02895                | 0                  | 0                  | 0                  | 0.1835             | 0.34867            | 0.07089            |
| Cpa4          | 30.8189     | 0.01989                | 0                  | 0                  | 0                  | 0.16164            | 0.04886            | 0.2732             |
| Igkv6-20      | 30.7391     | 0.01679                | 0                  | 0                  | 0                  | 1.91845            | 0.89218            | 1.79589            |
| Serpinb2      | 30.437      | 0.03779                | 0.03888            | 0                  | 0                  | 0.23559            | 0.05697            | 0.25485            |
| Gm37988       | 29.9505     | 0.0411                 | 0                  | 0                  | 0                  | 1.54281            | 0.24332            | 0.99772            |
| Ivl           | 29.5541     | 0.03021                | 0                  | 0                  | 0                  | 0.17276            | 0.06963            | 0.42826            |
| Tfpi2         | 29.216      | 3.8E-12                | 0.10457            | 0                  | 0                  | 1.9323             | 1.53207            | 2.44147            |
| Chl1          | 28.5008     | 1.8E-53                | 0.14117            | 0.03142            | 0.01696            | 3.07469            | 2.4059             | 3.84706            |
| Naip1         | 27.9497     | 0.02586                | 0                  | 0                  | 0                  | 0.10338            | 0.075              | 0.08387            |
| Cemip         | 27.2995     | 7.1E-14                | 0.01493            | 0.02526            | 0.01705            | 1.19439            | 1.00654            | 0.6668             |

|               |         |         |         |         |         |         |         |         |
|---------------|---------|---------|---------|---------|---------|---------|---------|---------|
| Cwh43         | 26.6806 | 0.04699 | 0       | 0       | 0       | 0.09492 | 0.11477 | 0.17969 |
| Wfdc17        | 26.4592 | 1E-10   | 1.02819 | 0.28988 | 0       | 18.0659 | 13.1818 | 30.7458 |
| Gjb4          | 26.3434 | 1.8E-06 | 0       | 0.05342 | 0       | 1.26294 | 1.01804 | 1.29372 |
| Fn1           | 25.8381 | 1.1E-27 | 7.5587  | 6.82275 | 2.19519 | 271.475 | 196.628 | 237.141 |
| Hist1h2ag     | 25.2052 | 1.1E-08 | 0.18832 | 0.63713 | 0       | 14.1487 | 9.24369 | 11.4172 |
| S100a9        | 24.5417 | 2.9E-06 | 1.57479 | 0.88795 | 1.39828 | 18.6586 | 11.024  | 165.856 |
| Has2          | 22.9647 | 1.1E-11 | 0.04311 | 0.01823 | 0.02461 | 1.37141 | 0.97914 | 1.04199 |
| Gpnmb         | 22.5742 | 1.3E-21 | 0.37587 | 0.52455 | 0.08582 | 18.5263 | 9.98192 | 10.6854 |
| Igkv4-70      | 21.9855 | 0.00027 | 0.241   | 0       | 0       | 9.34499 | 1.23587 | 4.73851 |
| Ighv1-54      | 21.0593 | 4E-06   | 0.72682 | 0.40982 | 0       | 16.4405 | 14.5541 | 12.1076 |
| Serpina3n     | 20.5441 | 7.6E-24 | 7.43445 | 7.11135 | 1.56609 | 158.11  | 154.413 | 231.23  |
| Mt2           | 20.0997 | 2.3E-21 | 8.85415 | 4.20418 | 3.19198 | 131.479 | 146.8   | 305.806 |
| Chodl         | 20.0359 | 4.1E-05 | 0.02391 | 0       | 0       | 0.37666 | 0.2102  | 0.45054 |
| Fst           | 19.484  | 3.5E-20 | 0.58625 | 0.13222 | 0.04462 | 7.24604 | 11.052  | 6.14769 |
| Ighg3         | 19.4479 | 2.9E-05 | 0.75974 | 0.49978 | 0.09637 | 2.04584 | 18.3053 | 23.5829 |
| Clec4n        | 19.3979 | 2E-16   | 0.32161 | 0.65283 | 0       | 13.0555 | 9.04743 | 13.1214 |
| A2m           | 18.8801 | 9.5E-08 | 0.01855 | 0.04706 | 0       | 0.94387 | 0.86953 | 0.63814 |
| Fpr1          | 18.4694 | 1.5E-05 | 0       | 0.11669 | 0       | 1.04494 | 1.11185 | 2.82587 |
| Sirpb1b       | 18.4108 | 1.8E-06 | 0.0635  | 0.10741 | 0.10873 | 1.07717 | 0.721   | 2.36685 |
| Bcl2a1b       | 18.3104 | 2.5E-09 | 1.22976 | 0.56733 | 0.38288 | 16.7984 | 9.58244 | 14.3796 |
| Igkv1-135     | 17.6881 | 2.3E-08 | 1.85457 | 0.39214 | 0       | 17.1357 | 25.4746 | 30.9571 |
| Ms4a6d        | 16.7373 | 1.1E-11 | 0.21058 | 0.48978 | 0.0601  | 6.79388 | 6.82631 | 10.0922 |
| Saa3          | 16.3511 | 1.1E-05 | 0.0701  | 0.7411  | 0.64019 | 11.5946 | 16.7668 | 21.0761 |
| Hist1h2bh     | 16.2108 | 1.3E-05 | 0       | 0.79641 | 0       | 8.27245 | 3.79405 | 8.48575 |
| Msr1          | 16.1741 | 2.7E-23 | 0.14397 | 0.2679  | 0.06574 | 3.53289 | 5.35813 | 5.01297 |
| Ccr1          | 15.9976 | 2.5E-12 | 0.22568 | 0.32722 | 0.18403 | 5.82113 | 6.11738 | 10.0106 |
| Hist1h2bk     | 15.9082 | 2E-06   | 0.76754 | 0.48688 | 1.09529 | 18.8342 | 9.41847 | 18.0784 |
| Fgg           | 15.6653 | 0.00369 | 0       | 0.07382 | 0       | 0.89898 | 0.35167 | 0.17876 |
| Igkv17-121    | 15.6076 | 0.00066 | 1.25809 | 0.42563 | 0       | 15.2451 | 4.05535 | 31.7456 |
| Hist1h4n      | 15.4245 | 2.3E-09 | 12.9572 | 9.88104 | 7.51725 | 94.9786 | 53.9975 | 77.4392 |
| Tnfsf18       | 15.2902 | 0.00013 | 0.04421 | 0.03739 | 0       | 0.77679 | 1.16596 | 0.54329 |
| Prss22        | 14.8015 | 1.3E-06 | 0.06904 | 0.05839 | 0       | 1.12938 | 1.315   | 1.47056 |
| Ereg          | 14.7482 | 1.8E-11 | 0.11063 | 0.01871 | 0.05052 | 1.60872 | 1.28056 | 1.75833 |
| Mgp           | 14.7303 | 2.9E-13 | 47.8618 | 32.8011 | 7.02756 | 741.563 | 457.288 | 880.359 |
| Ly6d          | 14.6711 | 1.3E-06 | 0.24553 | 0.20767 | 0       | 7.88444 | 2.24843 | 2.71557 |
| 4930558J22Rik | 14.2476 | 0.00121 | 0       | 0.07029 | 0       | 1.20851 | 0.54797 | 0.74897 |
| Ptger1        | 14.0205 | 0.00099 | 2.10818 | 2.10854 | 0.87864 | 1.94637 | 1.56895 | 1.72714 |
| Cd68          | 13.89   | 1.4E-13 | 1.52593 | 1.7208  | 0.33181 | 36.409  | 16.3956 | 35.3607 |
| Apoc2         | 13.8182 | 0.00041 | 0.11235 | 0       | 0       | 2.58661 | 1.9753  | 2.48509 |
| Ccl7          | 13.7953 | 5.3E-10 | 0       | 0.48222 | 0       | 3.24716 | 5.09577 | 5.51174 |
| C3ar1         | 13.661  | 2.2E-16 | 0.40312 | 0.46656 | 0.07266 | 8.52272 | 7.10322 | 6.7094  |
| Pla1a         | 13.461  | 4.5E-15 | 0.18527 | 0.23505 | 0.10575 | 3.1711  | 4.64864 | 5.08472 |
| Ebi3          | 13.1866 | 0.00272 | 0.2342  | 0.26411 | 0       | 1.08788 | 0.68629 | 1.471   |
| Igkv14-111    | 12.9999 | 3E-05   | 1.7374  | 0.20992 | 0       | 23.3089 | 12.9099 | 5.49017 |
| Cthrc1        | 12.8765 | 4.6E-05 | 0.06171 | 0.0522  | 0       | 1.12175 | 1.26593 | 0.55616 |
| Ccl6          | 12.6826 | 5.6E-10 | 7.68355 | 7.78973 | 1.27798 | 63.9106 | 59.7187 | 81.624  |
| Hist1h2ap     | 12.5276 | 2.2E-09 | 4.73743 | 5.12875 | 4.54295 | 47.4178 | 32.9014 | 47.195  |
| Cxcl10        | 12.4958 | 1.1E-07 | 0.17041 | 0.67259 | 0.25938 | 4.99022 | 5.07676 | 3.58323 |
| Igkv6-15      | 12.4729 | 0.00018 | 1.3161  | 0.22263 | 0       | 16.905  | 7.90618 | 10.1353 |
| Mmp13         | 12.4566 | 2.6E-07 | 0.03417 | 0.1156  | 0       | 1.69767 | 1.17655 | 0.81184 |
| Clec4a2       | 12.3939 | 3.6E-11 | 0.15608 | 0.07921 | 0.07127 | 1.98588 | 1.71514 | 1.86689 |
| Igkv1-110     | 12.3905 | 0.00091 | 8.65543 | 1.92648 | 0.26003 | 96.4652 | 78.5939 | 29.8569 |
| Il1rn         | 12.3443 | 3.4E-15 | 0.17576 | 0.27254 | 0.13377 | 6.08774 | 3.30489 | 3.83984 |
| Lcn2          | 12.2066 | 2.2E-09 | 2.43753 | 4.85953 | 1.66962 | 64.3276 | 39.898  | 100.704 |
| Cxcl13        | 12.1627 | 2.4E-10 | 1.58848 | 1.00763 | 0       | 16.4095 | 18.1539 | 16.9829 |
| Tmem37        | 12.1241 | 1.2E-11 | 0.62703 | 0.58926 | 0.15907 | 10.0042 | 6.89039 | 13.3562 |

|               |         |         |         |         |         |         |         |         |
|---------------|---------|---------|---------|---------|---------|---------|---------|---------|
| Cdh17         | 11.5256 | 0.01807 | 0       | 0       | 0.02331 | 0.19791 | 0.17947 | 0.11708 |
| Serpina3m     | 11.4935 | 5.3E-11 | 0.42507 | 0.49434 | 0.18197 | 6.11668 | 7.55159 | 10.4909 |
| Tarm1         | 11.3961 | 0.00013 | 0       | 0.07478 | 0       | 0.42858 | 0.64776 | 0.86926 |
| Clec4d        | 11.391  | 3.1E-13 | 0.17137 | 0.28988 | 0.06521 | 2.97638 | 3.05483 | 5.38169 |
| Wisp1         | 11.3551 | 3.7E-13 | 0.2814  | 0.196   | 0.07559 | 3.33965 | 4.19572 | 3.24105 |
| Ccl17         | 11.0743 | 1.8E-08 | 1.0662  | 1.50295 | 0.20286 | 20.887  | 9.24289 | 27.0782 |
| Hist1h2ad     | 11.0051 | 0.00276 | 0       | 0.3337  | 0       | 5.73718 | 6.93702 | 2.90912 |
| Trem2         | 10.9238 | 1.3E-28 | 0.12927 | 0.21867 | 0.10541 | 3.65874 | 2.42165 | 2.96532 |
| Arl11         | 10.8717 | 0.02186 | 0.24653 | 0.20851 | 0.14072 | 3.36072 | 2.21238 | 2.92853 |
| Gm7932        | 10.8645 | 1.4E-05 | 0.08326 | 0.03521 | 0       | 0.83237 | 0.97595 | 0.71623 |
| Il1r2         | 10.7937 | 9.3E-05 | 0.23935 | 0.08098 | 0.05465 | 0.92813 | 1.29759 | 5.17684 |
| Gpr176        | 10.7624 | 4.1E-06 | 0.14056 | 0.21795 | 0.05349 | 1.61804 | 1.44158 | 1.26666 |
| Hist1h2ab     | 10.5531 | 1.9E-09 | 1.15862 | 1.30658 | 0.44089 | 23.9845 | 12.1661 | 13.6053 |
| Cenpk         | 10.4463 | 0.00878 | 0       | 0.04221 | 0       | 0.57457 | 0.25595 | 0.24534 |
| Orm1          | 10.3774 | 0.00021 | 0.35356 | 0       | 0       | 1.42813 | 1.81313 | 1.93107 |
| Fcna          | 10.2711 | 0.00034 | 0.13295 | 0.11245 | 0.07589 | 0.84581 | 2.87328 | 2.72303 |
| Fcgr3         | 10.1991 | 8.3E-16 | 1.94671 | 1.91349 | 0.48051 | 24.7053 | 18.5014 | 28.104  |
| Gm21738       | 10.1973 | 0.00025 | 0.13412 | 1.02095 | 0.76558 | 7.31364 | 4.02855 | 11.977  |
| Lgals1        | 10.1724 | 9.7E-09 | 14.8424 | 5.31106 | 1.30339 | 119.188 | 81.3833 | 139.743 |
| Pira2         | 10.0449 | 0.0014  | 0       | 0.29008 | 0.03012 | 2.126   | 1.21766 | 2.26951 |
| Hist1h3c      | 10.0431 | 2.5E-11 | 5.04318 | 6.0032  | 1.49264 | 27.2738 | 21.4834 | 24.943  |
| Igkv2-109     | 9.99512 | 0.01764 | 0.24422 | 0       | 0       | 1.77561 | 0.89456 | 3.20124 |
| Osm           | 9.9392  | 1.4E-06 | 0.0804  | 0.034   | 0.04589 | 0.97429 | 1.03079 | 0.85632 |
| Syt13         | 9.93152 | 0.00033 | 0.04857 | 0       | 0       | 0.29428 | 0.33804 | 0.27854 |
| Cda           | 9.89657 | 0.00072 | 0.1765  | 0       | 0       | 1.22977 | 1.29301 | 0.72298 |
| Megf10        | 9.86528 | 5.3E-05 | 0.01183 | 0.01001 | 0.01351 | 0.23662 | 0.25142 | 0.14543 |
| S100a4        | 9.80668 | 4.2E-17 | 2.5024  | 3.04245 | 0.71419 | 38.4726 | 32.4255 | 44.4617 |
| Hist1h2bb     | 9.79526 | 2.2E-08 | 2.22282 | 1.70911 | 0.23069 | 29.8737 | 15.0999 | 17.5484 |
| Ly9           | 9.78073 | 5.5E-09 | 0.22096 | 0.4672  | 0.15765 | 3.11255 | 2.00315 | 1.94596 |
| Chac2         | 9.71771 | 0.01185 | 0.48621 | 0.35248 | 0       | 1.09417 | 1.11946 | 1.93474 |
| Cst7          | 9.71356 | 0.01721 | 0       | 0.07835 | 0       | 0.67351 | 0.61077 | 0.60713 |
| Ighg2b        | 9.69735 | 1.6E-05 | 7.12829 | 3.34623 | 0.03894 | 42.7344 | 40.8526 | 65.0492 |
| Fcgr1         | 9.67153 | 3.4E-08 | 0.14112 | 0.3879  | 0.08055 | 3.82612 | 4.08355 | 2.86136 |
| Hist1h2bj     | 9.65292 | 4E-07   | 2.17001 | 1.0011  | 1.35125 | 28.2078 | 19.5104 | 23.9194 |
| Tlr13         | 9.55904 | 4.9E-16 | 0.42744 | 0.53277 | 0.07705 | 5.1387  | 6.01561 | 6.17431 |
| Lama1         | 9.49953 | 1.8E-15 | 0.15354 | 0.16233 | 0.06573 | 2.90712 | 1.87003 | 1.69816 |
| Iglv3         | 9.46751 | 0.00997 | 0.47946 | 1.0138  | 0.27368 | 2.03349 | 6.67377 | 23.7646 |
| C1qc          | 9.45556 | 7.2E-17 | 2.60154 | 2.36036 | 0.70198 | 33.2154 | 23.806  | 35.9613 |
| Thbs4         | 9.4146  | 6E-07   | 0.16662 | 0.09395 | 0       | 1.71623 | 1.20033 | 1.45608 |
| AU018091      | 9.40507 | 0.00064 | 0.025   | 0.02115 | 0       | 0.46962 | 0.20149 | 0.20484 |
| Trem1         | 9.30364 | 9.5E-07 | 0.06097 | 0.12892 | 0.06961 | 0.9605  | 1.18371 | 2.44768 |
| Cd53          | 9.26951 | 4.4E-11 | 2.04487 | 1.64082 | 0.35914 | 23.4448 | 16.4018 | 23.7545 |
| Ccl9          | 9.26473 | 1.1E-17 | 1.34982 | 1.54757 | 0.27395 | 17.5379 | 16.4811 | 15.5556 |
| Hist1h3d      | 9.18432 | 2.3E-06 | 0.48931 | 2.48309 | 0       | 17.4913 | 9.20058 | 18.0391 |
| Dspp          | 9.13988 | 0.01064 | 0       | 0.01743 | 0       | 0.09991 | 0.16611 | 0.1351  |
| Dhrs9         | 9.08051 | 3E-06   | 0.08534 | 0.12632 | 0       | 0.94366 | 0.64084 | 2.06256 |
| Hist1h2an     | 8.85033 | 0.00185 | 1.39447 | 0.39314 | 0       | 5.77337 | 2.72421 | 3.61768 |
| Kcnt1         | 8.85013 | 9.7E-05 | 0.03846 | 0.01627 | 0.02195 | 0.19225 | 0.64807 | 0.32298 |
| Acod1         | 8.84465 | 0.0108  | 0.03482 | 0.02945 | 0       | 0.18988 | 0.63776 | 0.28528 |
| Igkv17-127    | 8.83996 | 0.03939 | 0       | 4.73409 | 0       | 12.7945 | 21.0618 | 22.5112 |
| Mmp19         | 8.82316 | 6.6E-21 | 1.82139 | 1.7897  | 0.2752  | 16.9752 | 14.8347 | 19.9471 |
| A530064D06Rik | 8.7684  | 0.02716 | 0       | 0.08077 | 0       | 0.26035 | 0.20987 | 0.46939 |
| Kng2          | 8.74889 | 0.00432 | 0       | 0.06158 | 0       | 0.26468 | 0.32003 | 0.68596 |
| Tshr          | 8.66398 | 0.0174  | 0.01874 | 0       | 0       | 0.14763 | 0.09612 | 0.09213 |
| Cd52          | 8.64435 | 1.7E-08 | 1.61591 | 1.7572  | 0.61491 | 29.5581 | 8.96311 | 24.3336 |
| Ube2c         | 8.57743 | 2.7E-05 | 0.21078 | 0.11885 | 0.0401  | 1.68148 | 1.59563 | 1.3239  |



|               |         |         |         |         |         |         |         |         |
|---------------|---------|---------|---------|---------|---------|---------|---------|---------|
| Sfrp1         | 8.56911 | 4E-21   | 2.15182 | 1.23688 | 0.54855 | 18.8221 | 20.3403 | 17.338  |
| Ackr1         | 8.54426 | 2.9E-05 | 0.13002 | 0.10997 | 0       | 0.74837 | 1.57163 | 1.70429 |
| Foxs1         | 8.52343 | 0.00154 | 0.13934 | 0       | 0.07954 | 1.60405 | 0.7656  | 0.91324 |
| Lgals3        | 8.49885 | 1.8E-18 | 4.47348 | 3.45097 | 1.90809 | 58.1396 | 35.0773 | 56.8668 |
| Igkv10-96     | 8.4565  | 0.00309 | 7.12382 | 1.93667 | 0       | 24.9723 | 17.5205 | 66.4914 |
| Igkv4-59      | 8.42108 | 0.00202 | 1.7374  | 0.41985 | 0       | 6.0152  | 19.0921 | 16.8772 |
| Ighv1-53      | 8.38875 | 5E-05   | 1.30111 | 1.32054 | 0       | 20.3386 | 18.873  | 6.39563 |
| Fcgr4         | 8.36618 | 1.9E-07 | 0.29088 | 0.30753 | 0.08302 | 2.68768 | 3.1965  | 4.64702 |
| Tnfrsf12a     | 8.28885 | 3.2E-16 | 2.84541 | 1.76484 | 0.54139 | 23.2163 | 17.8574 | 33.4904 |
| Ccl3          | 8.16002 | 0.01041 | 0       | 0.2017  | 0       | 2.16736 | 0.61148 | 0.87919 |
| Svop          | 8.09065 | 0.02673 | 0.02005 | 0       | 0       | 0.10932 | 0.11749 | 0.11497 |
| Ddias         | 8.08298 | 7.1E-06 | 0.04934 | 0.04174 | 0.11267 | 0.89692 | 0.8676  | 1.15215 |
| Evi2a         | 8.07002 | 0.02729 | 1.15315 | 1.04258 | 0.54474 | 5.01118 | 3.3209  | 3.84406 |
| Ano3          | 8.03863 | 0.03226 | 0.01265 | 0       | 0       | 0.07667 | 0.03708 | 0.10367 |
| Lox           | 8.02196 | 6.3E-13 | 4.10165 | 3.4691  | 0.58531 | 29.5108 | 39.6472 | 34.1319 |
| Ackr3         | 8.01964 | 2.8E-15 | 1.90969 | 0.96911 | 0.18687 | 15.5044 | 12.1115 | 12.2703 |
| Cxcl9         | 8.00337 | 0.0003  | 0.03028 | 0.20491 | 0.13829 | 1.66974 | 2.46266 | 1.56307 |
| RP23-110E20.5 | 7.92766 | 0.03767 | 0       | 0.02217 | 0       | 0.15879 | 0.2304  | 0.38649 |
| Rgs16         | 7.92135 | 0.01    | 0.19525 | 0.16514 | 0.2229  | 1.67983 | 1.40178 | 1.72756 |
| Cxcr2         | 7.90986 | 0.00026 | 0.29966 | 0.25345 | 0.17105 | 1.52511 | 0.76836 | 8.17521 |
| Emilin2       | 7.86941 | 3.9E-08 | 1.168   | 1.02739 | 0.53336 | 5.46322 | 4.94577 | 7.25324 |
| Mmp3          | 7.866   | 2E-10   | 1.57216 | 1.32971 | 0.17369 | 14.9027 | 13.0037 | 13.5864 |
| Cks2          | 7.83749 | 0.01064 | 0.39597 | 0.44654 | 0.30136 | 3.03889 | 3.67443 | 3.67657 |
| Gm14548       | 7.79952 | 0.00027 | 0.21461 | 0       | 0.049   | 1.56033 | 0.75466 | 3.30541 |
| Apoe          | 7.79465 | 1E-10   | 37.0004 | 20.3355 | 4.84378 | 309.925 | 148.533 | 316.023 |
| Bcat1         | 7.78169 | 0.0157  | 0.0098  | 0.00829 | 0.01119 | 0.07124 | 0.23687 | 0.10435 |
| B2m           | 7.76882 | 2.3E-07 | 47.1557 | 46.0816 | 18.1869 | 466.85  | 228.128 | 411.124 |
| Ighv1-15      | 7.71544 | 0.04929 | 1.82155 | 0.66027 | 0       | 7.56784 | 3.24082 | 23.2375 |
| Pilra         | 7.7135  | 1.5E-07 | 0.11824 | 0.25001 | 0.10123 | 1.95212 | 1.60245 | 3.39031 |
| Cd300lb       | 7.71091 | 1.2E-06 | 0.12525 | 0.1589  | 0.14298 | 2.9975  | 1.00932 | 2.15483 |
| Ch25h         | 7.70492 | 1.9E-08 | 0.74423 | 0.68668 | 0.07724 | 7.41964 | 6.64177 | 8.14804 |
| Gdf15         | 7.69486 | 6.2E-08 | 0.19727 | 0.25028 | 0.28151 | 4.39253 | 1.51747 | 4.5657  |
| Clca3a1       | 7.68649 | 2.8E-14 | 0.35139 | 0.39626 | 0.24069 | 4.0593  | 5.62902 | 3.95352 |
| Adamts12      | 7.64687 | 4.7E-11 | 0.26373 | 0.26023 | 0.06691 | 2.5211  | 3.22008 | 2.01656 |
| Thbs1         | 7.61942 | 1.8E-15 | 19.7023 | 11.5375 | 3.58846 | 153.253 | 103.328 | 171.553 |
| Ahsg          | 7.61478 | 0.00333 | 0.06197 | 0.05241 | 0       | 0.6007  | 0.18158 | 1.06608 |
| Ctsd          | 7.5601  | 6E-11   | 36.2864 | 29.8689 | 6.96326 | 237.319 | 169.347 | 217.962 |
| Hist1h3a      | 7.49664 | 5.5E-07 | 1.02627 | 2.16999 | 1.56212 | 20.0011 | 15.4126 | 21.8601 |
| Clec7a        | 7.46542 | 3.9E-13 | 0.8656  | 1.37636 | 0.43479 | 13.8455 | 8.67489 | 13.9276 |
| Tnf           | 7.45312 | 0.00488 | 0.05573 | 0       | 0.12724 | 1.0467  | 0.73486 | 0.50221 |
| Itgam_1       | 7.41417 | 6.7E-20 | 1.39988 | 1.33776 | 0.72641 | 10.971  | 11.0146 | 12.8538 |
| Lilrb4a       | 7.40012 | 5.4E-12 | 0.54489 | 1.95866 | 0.81644 | 15.1452 | 13.6721 | 18.2748 |
| Pappa         | 7.38668 | 2.8E-13 | 0.28991 | 0.1191  | 0.03782 | 1.58085 | 2.34837 | 1.45898 |
| A630033H20Rik | 7.37543 | 0.00171 | 0.05272 | 0.04459 | 0.03009 | 0.55899 | 0.65658 | 0.4967  |
| Gm13056       | 7.35035 | 0.01365 | 0.32389 | 0       | 0       | 1.27556 | 0.47456 | 2.91886 |
| Hist1h4a      | 7.31031 | 3.7E-06 | 1.1862  | 4.1564  | 1.74108 | 25.6678 | 17.7525 | 37.4839 |
| Clec5a        | 7.17901 | 1.8E-12 | 0.1665  | 0.20118 | 0.05431 | 1.55643 | 2.00391 | 1.92918 |
| Hist1h2bp     | 7.17661 | 0.00437 | 0.12937 | 0.9848  | 0       | 5.87888 | 3.12768 | 3.28569 |
| Hist1h1a      | 7.13194 | 3E-09   | 0.99589 | 1.44396 | 0.16242 | 10.2577 | 12.9241 | 10.1404 |
| Ighg2c        | 7.08966 | 0.01577 | 45.0489 | 22.1968 | 0       | 161.971 | 256.148 | 246.947 |
| Pilrb2        | 7.02173 | 0.00229 | 0.04667 | 0.03947 | 0       | 0.31106 | 0.54707 | 0.8412  |
| Ccl12         | 6.98912 | 0.00097 | 0.34018 | 0.28772 | 0       | 2.8855  | 2.49212 | 3.06562 |
| Wfdc21        | 6.94866 | 0.00089 | 0.63137 | 0.534   | 0       | 2.16769 | 3.70028 | 9.48293 |
| Tnip3         | 6.92775 | 5.2E-07 | 0.10044 | 0.10194 | 0.04586 | 1.30226 | 0.79466 | 1.03678 |
| Hist1h2ai     | 6.91356 | 0.00453 | 1.39447 | 0       | 0       | 6.33662 | 2.55394 | 7.23537 |
| Vcan          | 6.88896 | 5.4E-22 | 0.79578 | 0.57156 | 0.20909 | 5.70159 | 5.31624 | 7.5129  |

|               |         |         |         |         |         |         |         |         |
|---------------|---------|---------|---------|---------|---------|---------|---------|---------|
| Shcbp1        | 6.88873 | 2.3E-05 | 0.01451 | 0.06136 | 0.01656 | 0.29011 | 0.48896 | 0.43982 |
| Folr2         | 6.88499 | 0.00058 | 0.47264 | 0.04997 | 0       | 1.21705 | 2.85658 | 2.08127 |
| Marco         | 6.86808 | 0.00026 | 0.0949  | 0.40131 | 0.10833 | 1.35115 | 3.68458 | 2.60444 |
| Plau          | 6.83179 | 3.7E-11 | 0.54576 | 0.52754 | 0.13351 | 7.18025 | 3.82688 | 3.64084 |
| Emp3          | 6.757   | 6.4E-08 | 2.89961 | 1.87539 | 0.58415 | 22.0119 | 14.3698 | 25.7814 |
| Clec4e        | 6.58427 | 1.8E-05 | 0.11038 | 0.09336 | 0.042   | 0.52386 | 0.91644 | 1.49206 |
| Ly6c1         | 6.52027 | 2.3E-13 | 13.5618 | 10.7332 | 3.23322 | 107.941 | 74.5343 | 101.869 |
| Fcer1g        | 6.51109 | 1.5E-09 | 3.23966 | 2.47488 | 1.07373 | 30.2026 | 19.2165 | 28.596  |
| Retnlg        | 6.50433 | 0.00869 | 0.45068 | 1.52471 | 1.37199 | 5.27913 | 3.4117  | 39.0144 |
| Egfem1        | 6.47114 | 0.00431 | 0.02187 | 0.01849 | 0.02496 | 0.21198 | 0.22427 | 0.35829 |
| Chrna7        | 6.45608 | 4.7E-10 | 0.14192 | 0.17148 | 0.04629 | 1.89175 | 0.86148 | 1.52814 |
| Wnt7a         | 6.35551 | 1.6E-09 | 0.20156 | 0.12177 | 0.09862 | 1.62251 | 1.28679 | 1.86365 |
| Acp5          | 6.33418 | 1.5E-06 | 1.07985 | 1.06554 | 0.56502 | 7.0606  | 5.20803 | 5.7504  |
| Itn2a         | 6.33219 | 4.3E-09 | 0.62847 | 0.75303 | 0.11958 | 6.31458 | 4.02861 | 6.82213 |
| Hist1h2af     | 6.32058 | 0.00607 | 0       | 0.96807 | 1.30666 | 8.32178 | 5.19878 | 7.68919 |
| Tgtp1         | 6.30473 | 0.03443 | 0       | 2.0729  | 2.66779 | 3.72961 | 3.02728 | 3.12857 |
| Ear2          | 6.29131 | 7.6E-06 | 2.41365 | 2.4712  | 0.29005 | 21.8589 | 9.49257 | 18.7332 |
| Lst1          | 6.27848 | 0.00544 | 0.44018 | 0.55845 | 0       | 4.93391 | 2.57979 | 4.50777 |
| Igkv4-68      | 6.2648  | 0.02589 | 0       | 0.58821 | 0       | 6.461   | 2.03797 | 2.27905 |
| Hist1h2bm     | 6.19542 | 0.00045 | 0       | 1.21656 | 0.82104 | 9.44118 | 6.67377 | 7.07045 |
| S100g         | 6.16667 | 0.00392 | 1.14172 | 1.44847 | 0.43446 | 8.41627 | 3.90328 | 16.8365 |
| Tmem141       | 6.15759 | 0.01918 | 0.73265 | 0.82622 | 0.09293 | 1.62764 | 1.31203 | 2.40093 |
| Selp          | 6.10683 | 2.9E-13 | 0.28976 | 0.26258 | 0.09451 | 2.23215 | 2.16828 | 3.20477 |
| Prnp          | 6.07811 | 7.2E-06 | 13.0204 | 9.26493 | 3.56027 | 25.4615 | 19.7913 | 31.6498 |
| Ms4a1         | 6.07555 | 0.00755 | 0.17715 | 0.18729 | 0.03371 | 1.89624 | 0.44342 | 0.38703 |
| Atg9b         | 6.0633  | 5E-05   | 0.11573 | 0.01958 | 0.05285 | 0.67317 | 0.64438 | 0.66371 |
| Gjb5          | 6.03976 | 0.00094 | 0.10614 | 0.08978 | 0       | 0.64311 | 0.93313 | 0.69568 |
| Tnfrsf23      | 6.03213 | 0.01782 | 0.10896 | 0.16128 | 0.15549 | 1.61745 | 1.45681 | 1.56219 |
| Ccnb1         | 6.02675 | 6.7E-07 | 0.15162 | 0.12823 | 0.12363 | 1.49603 | 1.28527 | 1.1534  |
| Tmem42        | 6.01228 | 0.01827 | 0.90077 | 0.76185 | 0.20566 | 0.94598 | 1.2758  | 1.57431 |
| Gyg           | 5.99087 | 1E-07   | 4.55909 | 2.17518 | 0.53381 | 26.9144 | 16.7569 | 26.1774 |
| Rwdd2a        | 5.98311 | 0.02734 | 0.13237 | 0       | 0       | 0.40101 | 0.72732 | 0.32534 |
| Lamc2         | 5.97883 | 6.3E-13 | 2.56777 | 2.43123 | 0.46695 | 18.208  | 14.1584 | 21.5951 |
| RP23-145l16.3 | 5.9733  | 0.03772 | 0.71427 | 0       | 0       | 1.67697 | 1.96227 | 1.02405 |
| Fen1          | 5.9712  | 0.00025 | 0.75423 | 0.70171 | 0.51662 | 3.03889 | 3.45341 | 4.20179 |
| Eda2r         | 5.96078 | 2.8E-10 | 0.15505 | 0.1967  | 0.1239  | 2.05728 | 1.13586 | 2.03236 |
| Hist1h4j      | 5.92037 | 9.2E-06 | 2.12413 | 1.69674 | 0.53887 | 17.5171 | 8.12642 | 18.2722 |
| Brinp1        | 5.9114  | 1.6E-12 | 0.28077 | 0.24997 | 0.03374 | 2.06819 | 1.39651 | 2.49389 |
| Cdkn1a        | 5.90376 | 3.5E-20 | 6.61509 | 10.0431 | 3.84627 | 70.1021 | 55.0236 | 96.8097 |
| Serpine1      | 5.90137 | 2E-10   | 3.27552 | 1.91336 | 0.56494 | 21.6305 | 19.4042 | 13.5912 |
| Hist1h2ae     | 5.89784 | 0.00208 | 0       | 1.51145 | 0.22668 | 6.85733 | 4.21845 | 6.50686 |
| Sectm1a       | 5.89279 | 0.02877 | 0       | 0.09131 | 0       | 0.58872 | 0.27683 | 0.30958 |
| Rps27l        | 5.88503 | 5E-08   | 4.25347 | 2.27211 | 1.5334  | 28.4837 | 17.7123 | 37.6896 |
| Etv4          | 5.86853 | 0.00239 | 0.05885 | 0.07466 | 0.03359 | 0.67749 | 0.6036  | 0.53036 |
| Bmper         | 5.84083 | 2.7E-15 | 0.98273 | 0.47953 | 0.0863  | 5.53055 | 4.55503 | 4.97002 |
| Rpl39         | 5.83802 | 5.9E-10 | 10.5732 | 4.74069 | 2.61769 | 54.761  | 34.1099 | 56.4087 |
| Ighv1-80      | 5.82972 | 0.00298 | 3.90332 | 1.54063 | 0.29707 | 17.1853 | 20.7793 | 18.3342 |
| Shc4          | 5.81787 | 4.9E-06 | 0.07738 | 0.06544 | 0.01262 | 0.52239 | 0.46968 | 0.49807 |
| C1qb          | 5.80371 | 1.2E-11 | 5.12095 | 12.2126 | 3.83351 | 78.2286 | 60.8862 | 87.415  |
| Tfec          | 5.799   | 8E-06   | 0.08164 | 0.19334 | 0.05592 | 0.84088 | 0.98085 | 1.77909 |
| Cybb          | 5.78827 | 7.2E-11 | 1.52544 | 1.83553 | 0.50269 | 16.055  | 10.8296 | 11.7629 |
| Ighv1-7       | 5.78166 | 0.00011 | 0.47081 | 0.99551 | 0       | 5.9904  | 4.13897 | 5.9786  |
| Srpx2         | 5.77626 | 1E-06   | 0.46888 | 0.13219 | 0.03568 | 2.10223 | 2.24418 | 1.79262 |
| Igkv6-25      | 5.76998 | 0.00019 | 1.20181 | 0.60988 | 0       | 8.44661 | 3.69784 | 5.31679 |
| Ighv1-64      | 5.75733 | 0.00094 | 3.15735 | 1.14447 | 0       | 18.7199 | 7.26959 | 13.6724 |
| Rspo3         | 5.75135 | 0.00256 | 0.11824 | 0.025   | 0       | 0.42982 | 0.64964 | 0.36325 |

|               |         |         |         |         |         |         |         |         |
|---------------|---------|---------|---------|---------|---------|---------|---------|---------|
| Rpl29         | 5.73922 | 4.8E-09 | 7.13828 | 2.95011 | 1.85207 | 52.4402 | 27.1575 | 61.4714 |
| Mmp14         | 5.72458 | 1.2E-30 | 3.95142 | 3.02948 | 1.36303 | 30.331  | 24.8868 | 28.0172 |
| Tgfb1         | 5.72452 | 3.5E-19 | 7.12829 | 5.56743 | 1.98575 | 45.6068 | 43.5011 | 53.7885 |
| S100a11       | 5.70015 | 8.5E-08 | 62.0238 | 32.8055 | 14.0797 | 309.188 | 166.301 | 392.01  |
| Mt1           | 5.69318 | 3.7E-10 | 13.8546 | 7.00598 | 3.59845 | 57.1164 | 64.3356 | 115.006 |
| D130017N08Rik | 5.68702 | 0.02663 | 0.15299 | 0.05176 | 0.06986 | 0.40786 | 0.4035  | 0.42616 |
| C1qa          | 5.68063 | 2.7E-13 | 7.99204 | 10.5478 | 2.306   | 71.1968 | 57.3267 | 75.6204 |
| Al506816      | 5.63235 | 4.7E-12 | 2.63782 | 1.93911 | 1.26646 | 14.4735 | 13.2021 | 14.0973 |
| Serp1ng1      | 5.63172 | 2.1E-06 | 18.2282 | 8.17373 | 2.51148 | 92.2807 | 58.1067 | 109.041 |
| Tal2          | 5.60786 | 0.03343 | 0.03074 | 0.026   | 0       | 0.26077 | 0.18018 | 0.20149 |
| Fgf2          | 5.60386 | 1.9E-06 | 2.80369 | 1.91086 | 0.57488 | 9.63149 | 8.505   | 9.62261 |
| Hist1h2bf     | 5.60151 | 0.00025 | 0.39626 | 1.50817 | 0       | 12.0043 | 3.48356 | 10.713  |
| Tlr8          | 5.58409 | 4.9E-07 | 0.38206 | 0.45239 | 0.11631 | 3.30249 | 2.94822 | 3.13004 |
| Rps27         | 5.58131 | 2.7E-05 | 22.2433 | 8.88802 | 5.89839 | 121.928 | 50.8746 | 145.784 |
| Serpina3f     | 5.5625  | 9.9E-06 | 0.35897 | 0.87709 | 0.50087 | 3.93904 | 4.90892 | 8.82262 |
| Cers3         | 5.55792 | 0.00672 | 0.02805 | 0.04745 | 0.06405 | 0.39091 | 0.24661 | 0.82735 |
| Snai1         | 5.54882 | 2.7E-15 | 1.52135 | 1.04845 | 0.38595 | 10.9929 | 6.60464 | 11.5405 |
| Gda           | 5.5393  | 3.7E-19 | 1.78655 | 1.77547 | 0.8838  | 11.7445 | 14.6806 | 17.5516 |
| Fbn1          | 5.53479 | 5.1E-21 | 5.69354 | 6.12765 | 1.82269 | 41.4912 | 45.9753 | 39.031  |
| Ighm          | 5.52501 | 0.00021 | 34.2879 | 7.41387 | 1.65861 | 42.4292 | 164.409 | 125.971 |
| Lgmn          | 5.52295 | 7.3E-26 | 7.3133  | 8.64634 | 2.91763 | 64.6545 | 53.836  | 64.8109 |
| Col12a1       | 5.51859 | 3.1E-10 | 1.10363 | 1.06533 | 0.19173 | 7.41717 | 7.40405 | 6.20626 |
| Igkv1-117     | 5.49789 | 0.00211 | 4.74775 | 1.72095 | 0       | 12.8761 | 16.5627 | 35.377  |
| Litaf         | 5.47479 | 6E-16   | 3.83742 | 3.15791 | 1.42081 | 28.5497 | 19.8562 | 33.2227 |
| Ighv1-18      | 5.47058 | 0.01964 | 0.78066 | 0.66027 | 0       | 2.20729 | 3.24082 | 8.7407  |
| Ly86          | 5.45957 | 5.9E-06 | 1.09935 | 1.62717 | 0.41834 | 15.4308 | 7.71819 | 7.73057 |
| Flrt3         | 5.4583  | 9.8E-05 | 1.07014 | 0.52401 | 0.10716 | 5.31217 | 2.13187 | 4.66047 |
| Hbb-bs        | 5.45388 | 0.00863 | 15.8176 | 7.94647 | 1.22193 | 52.6737 | 24.5697 | 76.875  |
| Ms4a4a        | 5.45164 | 7.8E-05 | 0.54628 | 0.73925 | 0.37418 | 4.56752 | 7.04351 | 4.56492 |
| S100a6        | 5.40186 | 2.2E-12 | 14.7664 | 9.55051 | 3.89016 | 84.4064 | 62.5079 | 113.475 |
| Cd302         | 5.38804 | 5.4E-05 | 2.36102 | 1.71163 | 0.53907 | 14.632  | 9.93322 | 18.1269 |
| Ctss          | 5.35379 | 5E-12   | 15.1333 | 26.7366 | 8.36936 | 195.89  | 135.896 | 150.099 |
| Lrrc25        | 5.35368 | 6.4E-09 | 0.50533 | 0.32055 | 0.21633 | 3.48266 | 2.54511 | 3.93292 |
| Colec12       | 5.34765 | 2.7E-07 | 5.93887 | 3.09286 | 0.72193 | 30.5852 | 17.9872 | 33.45   |
| Slc7a8        | 5.34714 | 4E-09   | 0.31707 | 0.30648 | 0.15513 | 2.26409 | 2.67122 | 2.44915 |
| Pla2g7        | 5.33942 | 3.2E-10 | 1.00613 | 0.90415 | 0.35894 | 7.23895 | 4.58373 | 7.36698 |
| Lhfpl2        | 5.32344 | 5.3E-11 | 0.26487 | 0.39205 | 0.08819 | 2.9355  | 2.11833 | 1.98013 |
| Gm15922       | 5.32048 | 0.02534 | 0.34298 | 0       | 0       | 0.76728 | 0.90841 | 0.67005 |
| Sirpb1c       | 5.31811 | 5.3E-05 | 0.19249 | 0.35275 | 0.25638 | 2.35199 | 1.85674 | 2.70719 |
| Hist1h4k      | 5.29952 | 2.3E-05 | 4.09848 | 5.69484 | 3.67624 | 20.5751 | 12.0101 | 18.2276 |
| Hist1h3e      | 5.29805 | 1.2E-05 | 2.07585 | 1.66332 | 1.12254 | 14.8279 | 8.72434 | 15.7535 |
| AA467197      | 5.29585 | 6.7E-07 | 0.45555 | 0.64216 | 0.52006 | 4.41615 | 5.45096 | 5.66038 |
| Hist1h2bn     | 5.29052 | 0.0316  | 1.67812 | 1.82484 | 1.09471 | 7.4077  | 7.90315 | 6.28484 |
| Angptl4       | 5.28395 | 2.4E-07 | 3.41891 | 1.64565 | 0.63464 | 20.8156 | 12.0957 | 16.783  |
| Tubb3         | 5.27446 | 0.03775 | 0.09779 | 0.12407 | 0.05582 | 1.36276 | 1.32537 | 1.60233 |
| Nrcam         | 5.27309 | 3.8E-10 | 0.50603 | 0.56046 | 0.16505 | 4.21929 | 4.33379 | 2.56635 |
| Cpxm1         | 5.2614  | 1E-11   | 2.70407 | 1.68353 | 0.47162 | 16.247  | 13.9494 | 12.2151 |
| Ms4a7         | 5.26121 | 3.9E-07 | 0.14358 | 0.34696 | 0.11708 | 2.63464 | 1.45758 | 1.86526 |
| Ptptr         | 5.25278 | 2.9E-07 | 0.06518 | 0.06738 | 0.01654 | 0.746   | 0.23346 | 0.45096 |
| Sirpb1a       | 5.24233 | 0.0011  | 0.19934 | 0.13488 | 0       | 0.99037 | 0.67176 | 1.27382 |
| Nup43         | 5.22123 | 0.00272 | 0.28543 | 0.18106 | 0.16292 | 1.01601 | 0.86255 | 1.05228 |
| Iglc2         | 5.19375 | 0.00161 | 3.58187 | 1.38851 | 0.51113 | 9.85628 | 10.9335 | 27.3884 |
| Rps26         | 5.19218 | 2.6E-05 | 31.8762 | 11.7519 | 8.63097 | 177.286 | 85.3257 | 222.311 |
| Cilp          | 5.17832 | 0.0001  | 0.51555 | 0.41787 | 0.07357 | 2.52491 | 4.21749 | 1.65426 |
| Plat          | 5.17598 | 2.5E-07 | 2.23917 | 1.16354 | 0.28403 | 10.5608 | 9.07045 | 10.671  |
| Stra6l        | 5.14813 | 0.00146 | 0.00955 | 0.05652 | 0       | 0.24873 | 0.28676 | 0.1095  |



|               |         |         |         |         |         |         |         |         |
|---------------|---------|---------|---------|---------|---------|---------|---------|---------|
| Hist1h2bg     | 5.14322 | 7.5E-05 | 4.97857 | 3.56297 | 2.62318 | 51.6273 | 24.1281 | 37.9635 |
| Ifi211        | 5.12867 | 1.1E-05 | 1.94444 | 0.90884 | 0.58415 | 6.8516  | 8.32199 | 7.5877  |
| Ccl5          | 5.0786  | 0.00822 | 0.666   | 0.80471 | 0.10862 | 7.09042 | 2.36985 | 4.91065 |
| Itih3         | 5.06274 | 0.00039 | 0.10045 | 0.02124 | 0       | 0.38039 | 0.29437 | 0.45264 |
| Bgn           | 5.05387 | 2.2E-11 | 42.7849 | 28.2078 | 7.84304 | 236.41  | 172.758 | 235.618 |
| Ein           | 5.05095 | 4.5E-16 | 15.1343 | 20.1752 | 10.4327 | 112.242 | 183.902 | 121.916 |
| Hist1h2ac     | 5.04975 | 0.00099 | 1.72697 | 0.81147 | 1.09529 | 9.88212 | 4.21723 | 5.65933 |
| Ifi27l2a      | 5.04058 | 1.6E-06 | 4.93184 | 3.33701 | 2.7025  | 38.1283 | 33.2399 | 27.3134 |
| Hexb          | 5.03832 | 7.5E-08 | 4.12554 | 3.12415 | 1.04052 | 26.9433 | 16.7986 | 25.7814 |
| Sparcl1       | 5.03797 | 3.3E-10 | 50.3492 | 26.6186 | 9.86975 | 240.522 | 196.89  | 285.201 |
| Dab2          | 5.03555 | 1.1E-10 | 1.97803 | 1.80977 | 0.31245 | 10.2735 | 10.5264 | 12.8826 |
| Cstb          | 5.0247  | 1.4E-13 | 7.16672 | 5.41665 | 2.26299 | 47.8565 | 33.9593 | 49.4695 |
| Hmox1         | 5.01564 | 1.9E-10 | 2.55599 | 1.8971  | 0.65505 | 14.0325 | 14.5979 | 15.1709 |
| Lrg1          | 5.01512 | 5.9E-18 | 6.76074 | 9.37771 | 3.78187 | 59.2722 | 45.4674 | 78.0414 |
| Slc7a5        | 5.01217 | 2.2E-06 | 1.15773 | 0.72918 | 0.39369 | 4.32809 | 4.74601 | 5.79178 |
| Tlr6          | 5.00991 | 0.00033 | 0.07352 | 0.10364 | 0.08393 | 0.63848 | 0.5027  | 1.08419 |
| 1200007C13Rik | 5.00901 | 3E-06   | 0.14882 | 0.1888  | 0.04247 | 1.19471 | 1.00847 | 1.34113 |
| Ttk           | 5.00033 | 0.01515 | 0.01857 | 0.12564 | 0       | 0.52876 | 0.53052 | 0.28903 |
| Fcrls         | 4.99676 | 9.7E-11 | 0.54787 | 0.62887 | 0.26805 | 4.93174 | 4.18567 | 3.78312 |
| Ckap2         | 4.96871 | 6.9E-09 | 0.19887 | 0.24029 | 0.0973  | 1.63524 | 1.78991 | 1.34995 |
| Glrx          | 4.96659 | 2.9E-12 | 2.241   | 1.2636  | 0.6202  | 11.0268 | 9.40269 | 15.5221 |
| Rpl37         | 4.93567 | 2.8E-05 | 21.4912 | 8.19742 | 4.93095 | 95.3607 | 41.5989 | 130.152 |
| Appt          | 4.9337  | 3.6E-11 | 2.37534 | 1.67419 | 0.83934 | 8.66934 | 6.62918 | 8.01573 |
| Ctsb          | 4.89816 | 2.9E-12 | 15.9585 | 11.9651 | 4.29055 | 101.069 | 73.6061 | 91.3769 |
| Ulbp1         | 4.88955 | 0.002   | 0.05021 | 0.21235 | 0.17197 | 1.55158 | 1.36107 | 1.06957 |
| Col28a1       | 4.88858 | 8.7E-08 | 0.24213 | 0.22054 | 0.10631 | 1.6137  | 2.19679 | 1.00708 |
| Atox1         | 4.88819 | 2.1E-05 | 4.05194 | 2.85589 | 1.73465 | 30.7898 | 11.0079 | 35.6855 |
| Sifn4         | 4.88438 | 0.00352 | 0.18433 | 0.60414 | 0.28935 | 1.56359 | 5.89121 | 1.9821  |
| Il6           | 4.87513 | 0.00595 | 0.11286 | 0.06363 | 0       | 0.38747 | 0.68898 | 0.49311 |
| Ly6c2         | 4.86991 | 2.6E-06 | 1.93342 | 1.07137 | 0.19028 | 5.10985 | 4.22482 | 4.7246  |
| Pus3          | 4.86214 | 0.02501 | 0.92198 | 0.54586 | 0.35085 | 1.41515 | 0.65292 | 1.08265 |
| Uba52         | 4.85855 | 2.4E-09 | 7.49968 | 4.17716 | 2.01861 | 29.9234 | 18.046  | 43.9582 |
| Myadm         | 4.85562 | 2.5E-07 | 17.0035 | 11.8119 | 3.46796 | 46.5695 | 33.5761 | 48.572  |
| P4ha3         | 4.83266 | 2E-08   | 0.20394 | 0.36963 | 0.09978 | 2.06531 | 2.34784 | 1.456   |
| Serpina3i     | 4.83225 | 9.5E-05 | 0.20535 | 0.24315 | 0.18754 | 1.39345 | 2.13617 | 1.88418 |
| Tmem252       | 4.82364 | 1E-08   | 2.41143 | 1.5375  | 0.25411 | 11.3961 | 8.94171 | 13.0996 |
| C5ar1         | 4.82292 | 3.1E-16 | 1.74146 | 1.3226  | 0.40573 | 8.9362  | 9.29496 | 10.7439 |
| Fkbp11        | 4.81882 | 0.00571 | 0.2499  | 0.21136 | 0.28528 | 1.89261 | 2.28842 | 2.25203 |
| P2ry6         | 4.81422 | 1.3E-08 | 1.2538  | 0.89977 | 0.26024 | 7.84979 | 5.01015 | 7.28368 |
| Igsf6         | 4.8128  | 2.2E-05 | 1.13385 | 1.31417 | 0.28765 | 4.02009 | 3.78406 | 5.19502 |
| Hist1h2ak     | 4.80057 | 0.00046 | 1.62688 | 0.58971 | 1.06129 | 13.7998 | 11.7481 | 11.8051 |
| Bub1          | 4.79811 | 0.00018 | 0.10489 | 0.10646 | 0.07185 | 0.85158 | 0.82988 | 0.75619 |
| Cxcl14        | 4.79233 | 1.1E-07 | 9.92037 | 7.62771 | 0.97236 | 43.1062 | 42.9816 | 53.6076 |
| Sec61g        | 4.76679 | 3.3E-05 | 1.00086 | 0.87786 | 0.16927 | 6.37846 | 4.26355 | 10.2039 |
| Tnfaip8l2     | 4.76358 | 1.6E-05 | 0.81406 | 0.68852 | 0.18587 | 5.67209 | 2.98188 | 5.86894 |
| 1810055G02Rik | 4.74396 | 2.4E-06 | 0.87358 | 0.41048 | 0.33243 | 4.67536 | 3.23545 | 5.68573 |
| Ear1          | 4.74227 | 0.00578 | 1.00096 | 0.10582 | 0       | 2.8049  | 1.46659 | 2.76765 |
| Fcgr2b        | 4.74058 | 5E-15   | 1.45131 | 1.80121 | 0.52226 | 10.3033 | 9.21069 | 10.2098 |
| 2810417H13Rik | 4.72912 | 0.00104 | 0.55034 | 0.69018 | 0.38996 | 1.58672 | 1.52929 | 1.35261 |
| Fgl2          | 4.7191  | 0.00487 | 6.17276 | 6.05696 | 2.94537 | 7.53837 | 6.85384 | 10.9636 |
| Emp1          | 4.71705 | 7.5E-08 | 14.627  | 9.34719 | 1.97906 | 73.967  | 54.4712 | 64.9538 |
| Ly6a          | 4.71491 | 3.5E-08 | 26.757  | 23.5281 | 8.39364 | 177.455 | 121.943 | 174.684 |
| Lair1         | 4.71453 | 6.9E-07 | 0.30548 | 0.35138 | 0.0558  | 1.87304 | 1.84403 | 1.66175 |
| Kdelr3        | 4.69059 | 1.1E-05 | 1.42109 | 0.76487 | 0.22123 | 6.10539 | 6.48311 | 6.45624 |
| Bst1          | 4.68929 | 4.7E-07 | 0.82609 | 0.9083  | 0.06287 | 4.65475 | 3.97405 | 5.36909 |
| Gm26703       | 4.67726 | 0.01934 | 0.13307 | 0.12662 | 0.09495 | 0.45352 | 0.68242 | 0.42245 |

|               |         |         |         |         |         |         |         |         |
|---------------|---------|---------|---------|---------|---------|---------|---------|---------|
| Cxcl15        | 4.67501 | 3E-05   | 22.1151 | 16.4528 | 3.52964 | 92.155  | 62.572  | 167.459 |
| Tubb6         | 4.66471 | 1.7E-09 | 3.7949  | 2.76998 | 0.83085 | 18.2366 | 16.9092 | 23.3814 |
| Atp1a3        | 4.6554  | 2.8E-08 | 0.18396 | 0.44085 | 0.15751 | 2.3871  | 1.72955 | 2.68771 |
| Alox5ap       | 4.64612 | 5.2E-09 | 2.70153 | 3.97139 | 0.88117 | 16.2902 | 12.723  | 21.2367 |
| Foxf1         | 4.61323 | 6.5E-06 | 26.9285 | 15.8982 | 5.13801 | 37.7411 | 26.8762 | 43.2861 |
| Ccr5          | 4.60913 | 1.7E-07 | 0.34655 | 0.64117 | 0.34617 | 4.06814 | 3.57812 | 3.50456 |
| Slc39a14      | 4.60793 | 3.1E-22 | 1.23804 | 0.95192 | 0.63255 | 6.7352  | 8.46723 | 7.89427 |
| Lipa          | 4.54372 | 8.2E-07 | 3.66089 | 3.30447 | 0.31608 | 22.2739 | 14.0182 | 16.5838 |
| Rnasek        | 4.53528 | 0.00026 | 4.8507  | 1.65851 | 1.29603 | 23.9493 | 14.5168 | 25.2812 |
| Cdh11         | 4.53257 | 1.3E-09 | 2.14393 | 1.24068 | 0.31619 | 10.0624 | 6.94383 | 10.5638 |
| Igkv13-85     | 4.52826 | 0.00389 | 1.57932 | 0.22263 | 0       | 6.06027 | 2.69967 | 3.01903 |
| Rtn4rl2       | 4.52134 | 7.4E-08 | 0.97039 | 0.41037 | 0.5539  | 4.88725 | 3.68779 | 6.95621 |
| Ifi204        | 4.50754 | 9.2E-05 | 0.35909 | 0.54235 | 0.49779 | 3.55878 | 5.37411 | 2.29047 |
| Tnfrsf26      | 4.50386 | 0.00015 | 0.11353 | 0.14404 | 0       | 0.75667 | 0.70698 | 0.6976  |
| Ifitm2        | 4.5014  | 4.2E-07 | 18.2675 | 9.67121 | 5.25337 | 100.964 | 53.122  | 145.202 |
| Glipr2        | 4.49873 | 2.3E-13 | 1.22046 | 1.7315  | 0.4045  | 8.51566 | 7.64312 | 10.9341 |
| Dctd          | 4.49377 | 0.00447 | 0.05359 | 0.06798 | 0       | 0.3409  | 0.43183 | 0.2634  |
| I830077J02Rik | 4.48683 | 0.00061 | 0.12752 | 0.18875 | 0.07279 | 0.96579 | 0.88751 | 1.38427 |
| S100a10       | 4.47019 | 1.1E-06 | 9.72158 | 5.2266  | 1.37652 | 40.409  | 31.8004 | 45.9346 |
| Rpl31         | 4.45767 | 3.2E-07 | 15.113  | 6.50737 | 4.14074 | 68.2924 | 34.8255 | 85.8597 |
| Myc           | 4.4559  | 1.7E-08 | 1.00851 | 0.90985 | 0.61404 | 6.86402 | 6.13228 | 7.46361 |
| Col5a2        | 4.40779 | 6.8E-14 | 3.48551 | 5.00997 | 2.45703 | 29.173  | 35.1066 | 23.4996 |
| Gapdh         | 4.3923  | 1.1E-05 | 4.6292  | 1.71671 | 1.01629 | 20.7983 | 11.4522 | 27.3352 |
| Cldn4         | 4.38739 | 8E-10   | 1.91125 | 1.31872 | 1.14836 | 11.0314 | 10.2433 | 13.4742 |
| Ms4a6c        | 4.37575 | 3.3E-11 | 1.60398 | 1.65809 | 0.55951 | 10.6091 | 9.04146 | 9.454   |
| Ildr2         | 4.32582 | 2.7E-08 | 0.35424 | 0.59921 | 0.1011  | 2.68282 | 2.95194 | 1.9952  |
| Rpl35a        | 4.32518 | 3.8E-07 | 5.02538 | 2.41001 | 1.09417 | 16.4168 | 10.8359 | 19.0998 |
| Hsd11b1       | 4.32423 | 4.5E-06 | 5.90863 | 3.8373  | 0.76286 | 24.0367 | 13.7331 | 32.3577 |
| Slfn9         | 4.31616 | 0.00014 | 0.21437 | 0.27197 | 0.26221 | 2.29152 | 2.37814 | 1.37991 |
| Tlr7          | 4.29828 | 4.1E-06 | 0.71602 | 0.28387 | 0.10218 | 2.53517 | 2.80308 | 2.49308 |
| Tceb2         | 4.29527 | 7.8E-08 | 11.6869 | 6.38696 | 2.87362 | 54.0326 | 36.7496 | 62.0137 |
| Igkv8-30      | 4.28697 | 0.01459 | 7.9424  | 4.82823 | 0       | 31.4294 | 9.27331 | 46.9714 |
| Arhgdib       | 4.2771  | 2.3E-07 | 2.46135 | 2.6701  | 1.64929 | 19.6137 | 11.015  | 18.1483 |
| Ighv1-39      | 4.27634 | 0.00273 | 3.12265 | 1.54063 | 0       | 7.56784 | 13.9164 | 9.80664 |
| Hist1h2be     | 4.27471 | 1.8E-05 | 1.34871 | 0.9506  | 0.51323 | 8.1262  | 3.62287 | 8.93159 |
| Adgre1        | 4.27378 | 8.9E-08 | 1.23848 | 2.28541 | 0.41773 | 11.3749 | 7.93887 | 10.2847 |
| Loxl1         | 4.27179 | 3E-12   | 5.42984 | 4.35815 | 1.3283  | 28.1986 | 23.441  | 28.3247 |
| Scarb1        | 4.25941 | 8E-12   | 2.19792 | 2.35141 | 0.66468 | 12.2321 | 8.42415 | 18.1974 |
| Cysltr1       | 4.24161 | 3.2E-05 | 0.17763 | 0.09014 | 0.02028 | 0.92556 | 0.65065 | 0.69852 |
| Ifi205        | 4.23784 | 3.1E-06 | 1.15894 | 0.70279 | 0.22467 | 3.89512 | 4.42137 | 5.82222 |
| Il2rg         | 4.23191 | 8.8E-07 | 2.02802 | 1.84472 | 0.61156 | 13.4466 | 7.9612  | 10.5331 |
| Ifitm3        | 4.22827 | 4.3E-09 | 30.9847 | 25.1809 | 12.7648 | 189.363 | 120.404 | 213.229 |
| Pgf           | 4.22464 | 1.1E-07 | 0.46188 | 0.53715 | 0.39547 | 3.673   | 3.38373 | 3.45292 |
| Mest          | 4.22004 | 4.1E-08 | 0.57882 | 0.39164 | 0.07929 | 2.42682 | 2.95131 | 2.7314  |
| Cdk1          | 4.20995 | 0.00021 | 0.15908 | 0.26909 | 0.15134 | 1.57425 | 1.70925 | 1.12949 |
| Fxyd5         | 4.20801 | 2.6E-12 | 1.80845 | 2.00869 | 0.64672 | 12.0924 | 8.65148 | 12.406  |
| Cyp7b1        | 4.20336 | 3.8E-12 | 1.01205 | 0.92731 | 0.33698 | 5.87635 | 4.07782 | 7.28943 |
| Cd33          | 4.20122 | 1.8E-07 | 0.82276 | 0.88475 | 0.10734 | 3.68885 | 3.14288 | 5.97977 |
| Cd300ld       | 4.19337 | 2.1E-05 | 0.48345 | 0.52572 | 0.07884 | 2.19686 | 1.82146 | 4.21532 |
| Tyrobp        | 4.19084 | 2.4E-13 | 6.8469  | 9.49722 | 3.43924 | 56.5014 | 34.0084 | 60.8055 |
| Nuf2          | 4.17904 | 4.3E-06 | 0.07202 | 0.14619 | 0       | 0.69818 | 0.56983 | 0.42483 |
| Prc1          | 4.16907 | 5.7E-05 | 0.2221  | 0.42265 | 0.20284 | 1.70225 | 1.87113 | 1.03714 |
| Hist1h3f      | 4.14473 | 6.8E-06 | 2.80044 | 2.45967 | 2.21331 | 19.9693 | 11.6783 | 22.3251 |
| Hba-a2        | 4.14033 | 0.03816 | 33.5498 | 15.1724 | 1.71962 | 86.5359 | 42.4353 | 149.658 |
| Gins2         | 4.13482 | 0.02249 | 0.17835 | 0.39597 | 0.02545 | 1.66141 | 1.22492 | 1.09586 |
| Tm4sf19       | 4.12988 | 0.03897 | 0.14533 | 0.12291 | 0       | 1.23271 | 0.3194  | 0.53577 |



|               |         |         |         |         |         |         |         |         |
|---------------|---------|---------|---------|---------|---------|---------|---------|---------|
| Atp6v0d2      | 4.12549 | 1.8E-06 | 1.54695 | 1.27994 | 0.19196 | 7.37593 | 5.86354 | 7.60412 |
| Tubb2b        | 4.12242 | 1.1E-05 | 1.04549 | 0.52251 | 0.27126 | 6.16167 | 4.00366 | 4.16581 |
| Rps29         | 4.11522 | 1E-06   | 32.6865 | 16.6097 | 7.97459 | 157.315 | 78.0172 | 189.826 |
| Enc1          | 4.11362 | 2.7E-13 | 1.75279 | 1.28699 | 0.3958  | 7.55059 | 8.25481 | 8.0636  |
| Anxa1         | 4.10885 | 1.5E-15 | 14.4291 | 9.06405 | 5.91725 | 70.3631 | 54.1105 | 91.9007 |
| Mrc1          | 4.1087  | 7.5E-08 | 4.17191 | 3.5164  | 0.81833 | 14.063  | 20.1444 | 22.4804 |
| Cdc20         | 4.10024 | 0.0004  | 0.44006 | 0.24813 | 0.2791  | 2.22189 | 2.86567 | 1.88274 |
| Dcakd         | 4.08418 | 4.1E-05 | 1.0363  | 0.81604 | 0.48954 | 5.23953 | 3.74358 | 4.91833 |
| Frzb          | 4.08162 | 0.00788 | 0.08465 | 0.04773 | 0       | 0.4445  | 0.35141 | 0.18493 |
| Capn6         | 4.07908 | 6.8E-05 | 0.08202 | 0.03964 | 0.02675 | 0.38337 | 0.34337 | 0.33599 |
| Tnfsf9        | 4.07022 | 0.02208 | 0.74258 | 0.12561 | 0.16955 | 1.34975 | 1.14242 | 2.12928 |
| Lrrc8a        | 4.06793 | 0.0006  | 11.1522 | 7.10114 | 3.00131 | 23.2253 | 20.7357 | 26.7668 |
| Ccna2         | 4.05908 | 1.6E-07 | 0.26844 | 0.54869 | 0.15323 | 2.35835 | 2.86795 | 2.47414 |
| Milr1         | 4.04818 | 0.00029 | 0.18459 | 0.28103 | 0       | 1.11843 | 1.29824 | 1.14935 |
| Slc11a1       | 4.04773 | 2.3E-10 | 0.64097 | 0.77147 | 0.197   | 4.39134 | 3.14249 | 4.12014 |
| Ctla2a        | 4.03566 | 1.4E-06 | 11.176  | 7.31444 | 1.67077 | 40.5879 | 25.7321 | 67.6894 |
| Gjb3          | 4.02903 | 0.00054 | 0.27875 | 0.39294 | 0.10607 | 1.40742 | 2.34843 | 1.86501 |
| Cd200r4       | 4.02608 | 0.00175 | 0.22332 | 0.22666 | 0       | 1.1095  | 1.07977 | 1.13433 |
| Ttyh2         | 4.02465 | 9.1E-14 | 1.14813 | 0.68182 | 0.11155 | 4.91384 | 3.65079 | 4.88319 |
| Rpl24         | 4.02318 | 5.4E-05 | 17.3807 | 9.0002  | 4.35308 | 81.4517 | 46.1897 | 94.5169 |
| Aldh1a3       | 4.01145 | 0.00126 | 0.13848 | 0.10039 | 0.06775 | 0.49143 | 0.59421 | 1.02106 |
| B430306N03Rik | 4.00845 | 0.00019 | 0.0395  | 0.08909 | 0.10522 | 0.59033 | 0.54981 | 0.57171 |
| Tmem26        | 3.98536 | 0.02427 | 0.05424 | 0.03058 | 0.08256 | 0.49293 | 0.22516 | 0.48879 |
| Cav2          | 3.98257 | 4.8E-05 | 8.92835 | 5.25821 | 1.71962 | 19.398  | 12.6403 | 23.9632 |
| Plek          | 3.97904 | 5.7E-16 | 2.19894 | 2.22146 | 0.81353 | 12.6322 | 11.1572 | 12.7439 |
| Hbegf         | 3.97669 | 4.2E-17 | 2.69432 | 1.92071 | 0.83487 | 12.9196 | 9.55904 | 15.7667 |
| Serpina3g     | 3.9741  | 6.1E-05 | 1.17155 | 2.42215 | 1.38698 | 10.9365 | 10.7125 | 13.8282 |
| Gtse1         | 3.96135 | 1.2E-05 | 0.16784 | 0.22713 | 0.26825 | 1.7084  | 1.4263  | 1.51253 |
| Prr11         | 3.95953 | 0.00693 | 0.09554 | 0.18182 | 0.21814 | 1.09985 | 1.71483 | 0.84143 |
| Mmp9          | 3.954   | 0.00425 | 0.8775  | 0.32743 | 0.20624 | 1.42298 | 1.68276 | 6.63924 |
| Rpl26         | 3.9503  | 7.5E-06 | 19.988  | 10.0577 | 5.05471 | 81.7834 | 42.0757 | 97.1636 |
| Ii1b          | 3.94505 | 0.00749 | 0.47896 | 1.01274 | 0.60146 | 4.38192 | 1.85968 | 10.4768 |
| Tmem173       | 3.94253 | 7E-09   | 1.5871  | 1.14099 | 0.90592 | 10.7458 | 6.74365 | 8.41907 |
| Ccdc184       | 3.94143 | 0.01858 | 0.11765 | 0.13268 | 0.13431 | 1.1643  | 0.74699 | 0.83536 |
| Dpep2         | 3.93847 | 1.9E-05 | 0.34201 | 0.52749 | 0.11484 | 2.14533 | 2.47609 | 2.20861 |
| Serpine2      | 3.93198 | 1.3E-12 | 5.87402 | 4.65396 | 1.35177 | 29.1892 | 22.5709 | 26.4013 |
| Sh3bgrl3      | 3.91306 | 1.4E-05 | 12.3489 | 9.12719 | 4.95321 | 66.4617 | 43.9297 | 69.816  |
| Kif2c         | 3.91216 | 0.00011 | 0.08374 | 0.14165 | 0.0478  | 0.72298 | 0.72082 | 0.49737 |
| Mpeg1         | 3.90754 | 1.5E-08 | 7.79583 | 10.3002 | 2.14075 | 56.0547 | 34.4677 | 43.0849 |
| Ptafr         | 3.89153 | 1.6E-08 | 0.65295 | 0.57349 | 0.20069 | 4.4278  | 2.59411 | 2.79811 |
| Spon2         | 3.89114 | 1.5E-05 | 0.27894 | 0.23592 | 0.10615 | 1.8215  | 1.02175 | 1.4981  |
| Gm26870       | 3.88393 | 0.00407 | 0.95002 | 1.00439 | 1.43315 | 8.75735 | 4.64814 | 16.8448 |
| Ap1s2         | 3.87656 | 2.5E-06 | 1.45331 | 1.08915 | 0.25202 | 4.48069 | 6.72502 | 6.16416 |
| Cd200r1       | 3.86306 | 1E-05   | 0.17962 | 0.49374 | 0.20506 | 2.23101 | 1.87515 | 2.17055 |
| Igf1          | 3.86264 | 4E-09   | 1.17123 | 1.31041 | 0.31585 | 6.30284 | 6.35082 | 5.31902 |
| Vps25         | 3.86104 | 0.00657 | 4.72819 | 0.70571 | 0.76203 | 10.3804 | 7.37595 | 13.6715 |
| Kcne4         | 3.8399  | 0.03396 | 1.99382 | 1.01762 | 0.51017 | 3.24916 | 4.23088 | 4.19628 |
| Pdpn          | 3.83827 | 6.3E-08 | 9.80233 | 6.46245 | 2.00853 | 42.1216 | 32.4808 | 41.5945 |
| Mfap4         | 3.83341 | 6.5E-05 | 24.1413 | 11.4551 | 4.01461 | 116.064 | 47.8698 | 82.8102 |
| Slpi          | 3.83038 | 1.2E-06 | 4.48947 | 4.58273 | 0.97202 | 15.1012 | 27.6159 | 21.0536 |
| Lyve1         | 3.82385 | 0.00138 | 24.751  | 15.9849 | 1.50031 | 61.5393 | 62.9246 | 121.305 |
| Medag         | 3.8223  | 1.7E-07 | 2.07795 | 1.15214 | 0.39537 | 5.21784 | 7.39159 | 10.0819 |
| Kif20a        | 3.81801 | 0.00592 | 0.16843 | 0.28491 | 0.27469 | 1.86604 | 2.34443 | 1.06448 |
| Lilra6        | 3.8111  | 0.01405 | 0.11979 | 0.10131 | 0.06837 | 0.81649 | 0.35102 | 0.95683 |
| Capg          | 3.8101  | 3.9E-15 | 2.45589 | 2.5048  | 1.23691 | 15.5363 | 11.43   | 15.5931 |
| Fstl1         | 3.80857 | 5E-12   | 9.75829 | 7.16866 | 2.58875 | 39.9001 | 41.8583 | 33.8816 |

|               |         |         |         |         |         |         |         |         |
|---------------|---------|---------|---------|---------|---------|---------|---------|---------|
| Cd79a         | 3.80024 | 0.01027 | 1.00302 | 1.11344 | 0.4294  | 10.673  | 3.03108 | 3.80051 |
| Ccl8          | 3.79649 | 0.00156 | 1.78743 | 2.11649 | 0.20405 | 6.28124 | 10.7376 | 10.1041 |
| Syt12         | 3.79227 | 0.00691 | 0.1649  | 0.13947 | 0.11295 | 0.64941 | 0.77315 | 0.64845 |
| Ticam2        | 3.79211 | 0.00397 | 0.23253 | 0.118   | 0       | 1.18344 | 0.7325  | 0.5715  |
| Hgf           | 3.79171 | 1.4E-06 | 0.87702 | 0.60202 | 0.11608 | 3.56559 | 2.51414 | 4.05072 |
| Pi15          | 3.78792 | 0.00016 | 1.55682 | 0.63605 | 0.10543 | 4.94006 | 4.89067 | 6.73385 |
| Isg15         | 3.7836  | 0.00012 | 1.4498  | 2.14588 | 1.1034  | 10.3213 | 12.7454 | 8.90821 |
| Tdo2          | 3.78057 | 0.00525 | 0.11767 | 0.03981 | 0.02687 | 0.3137  | 0.34483 | 0.59771 |
| Csf2rb        | 3.7785  | 3.4E-12 | 1.57214 | 2.35128 | 0.80983 | 12.8592 | 8.23073 | 11.3563 |
| Tlcd2         | 3.76221 | 0.04481 | 0.09436 | 0.07981 | 0.10772 | 0.77179 | 0.553   | 0.54112 |
| Fau           | 3.75589 | 0.00026 | 31.8281 | 16.493  | 7.93231 | 144.834 | 93.5144 | 138.089 |
| Slfn1         | 3.75552 | 1.5E-06 | 0.78401 | 0.87033 | 0.11188 | 4.03767 | 3.62567 | 4.09472 |
| Scube1        | 3.75152 | 1.8E-15 | 0.974   | 0.66644 | 0.23738 | 3.87896 | 3.78422 | 4.43809 |
| Areg          | 3.74948 | 1.7E-05 | 0.52622 | 1.46238 | 0.60074 | 6.83208 | 3.35943 | 8.31433 |
| Esd           | 3.7384  | 1.8E-10 | 2.79494 | 1.74425 | 0.74347 | 11.0318 | 8.76672 | 13.7609 |
| Col4a1        | 3.73148 | 2E-14   | 29.7133 | 33.7009 | 8.29244 | 157.672 | 157.754 | 166.411 |
| Fscn1         | 3.72533 | 1.2E-09 | 1.51623 | 2.41091 | 1.14242 | 15.0476 | 11.5299 | 7.87542 |
| Mastl         | 3.7206  | 0.00169 | 0.17392 | 0.09361 | 0.0722  | 0.6035  | 0.97295 | 0.59583 |
| Emilin1       | 3.71891 | 1.9E-21 | 4.34765 | 4.66296 | 1.68963 | 24.2343 | 19.4356 | 26.5243 |
| Rpl36         | 3.7186  | 7.6E-05 | 34.8168 | 13.7676 | 12.3887 | 122.597 | 58.9632 | 170.032 |
| Psat1         | 3.71591 | 2E-05   | 0.5153  | 0.41768 | 0.31865 | 2.4847  | 2.84704 | 3.04311 |
| Cd109         | 3.7155  | 0.0006  | 0.35741 | 0.12315 | 0.06045 | 1.03461 | 1.39645 | 0.84589 |
| Svep1         | 3.71434 | 1E-07   | 2.85058 | 1.73993 | 0.45935 | 11.9353 | 7.32779 | 10.8132 |
| Myl12a        | 3.70916 | 3.7E-06 | 12.983  | 6.41955 | 2.60597 | 55.1151 | 30.1852 | 57.7873 |
| Tnfrsf11b     | 3.70564 | 0.00102 | 0.16206 | 0.1919  | 0.074   | 1.27647 | 0.59362 | 1.0356  |
| Nlrp12        | 3.70303 | 0.04051 | 0.12106 | 0.10239 | 0.04146 | 0.26405 | 0.1685  | 1.20996 |
| Rap2b         | 3.70025 | 4.3E-10 | 1.16979 | 0.57999 | 0.16885 | 4.08145 | 2.96495 | 3.96561 |
| Gamt          | 3.69214 | 0.00138 | 0.37952 | 0.21399 | 0.07221 | 1.34134 | 1.11213 | 2.021   |
| Cystm1        | 3.68529 | 3.9E-06 | 2.28344 | 1.49607 | 0.69759 | 10.4639 | 6.4086  | 12.0148 |
| Lgals9        | 3.68203 | 6.5E-08 | 4.53055 | 4.12106 | 1.85415 | 24.3164 | 18.5366 | 25.7717 |
| Oas3          | 3.67653 | 9.2E-05 | 0.17474 | 0.31037 | 0.19949 | 1.45046 | 2.02263 | 1.13095 |
| Ras11a        | 3.676   | 1.8E-05 | 1.52103 | 0.70755 | 0.60774 | 6.72741 | 3.45431 | 8.47355 |
| Tmem88        | 3.67321 | 4.6E-05 | 1.38565 | 0.53715 | 0.06591 | 3.81292 | 3.04536 | 5.91253 |
| 1500009L16Rik | 3.67163 | 0.00453 | 0.22968 | 0.32377 | 0.26221 | 1.8091  | 1.34612 | 2.32076 |
| Tgm1          | 3.66945 | 3.4E-07 | 0.30385 | 0.71958 | 0.20813 | 2.65101 | 2.24825 | 3.50994 |
| Ighv1-69      | 3.66754 | 0.01575 | 2.08177 | 0       | 0       | 3.62626 | 5.52845 | 6.82201 |
| Prrx2         | 3.66229 | 0.02201 | 0.13973 | 0.07879 | 0.10635 | 0.81839 | 0.64832 | 0.61054 |
| Pld3          | 3.64628 | 3.4E-10 | 4.06084 | 3.40817 | 1.06982 | 20.0049 | 13.227  | 20.3707 |
| Rhog          | 3.64274 | 8.4E-09 | 5.59604 | 4.78743 | 0.9546  | 24.9029 | 16.3514 | 29.0357 |
| Fbxw10        | 3.63051 | 0.02523 | 0.09077 | 0.15354 | 0.05181 | 0.42622 | 0.71485 | 0.33464 |
| Chil3         | 3.62884 | 0.00778 | 10.018  | 33.3243 | 6.96421 | 46.9643 | 103.527 | 165.614 |
| Tuba1c        | 3.62529 | 1.9E-10 | 3.32641 | 1.95376 | 1.84598 | 16.5992 | 14.4183 | 20.9688 |
| Cd300a        | 3.62173 | 4.3E-08 | 0.50122 | 0.39131 | 0.3081  | 3.78432 | 1.59586 | 2.52694 |
| Cd276         | 3.61726 | 1.5E-07 | 0.34957 | 0.40125 | 0.28505 | 2.04234 | 2.28654 | 2.55703 |
| Apex1         | 3.61133 | 5E-06   | 1.15617 | 0.70624 | 0.07333 | 4.67003 | 4.28208 | 4.68339 |
| Grp           | 3.60456 | 0.01131 | 0.51749 | 0.07295 | 0.19692 | 1.46319 | 1.64282 | 1.7665  |
| Hif1a         | 3.5971  | 3.6E-11 | 3.54754 | 2.46325 | 0.79583 | 14.2667 | 10.7361 | 13.4022 |
| Olfml3        | 3.58928 | 6.9E-10 | 2.9502  | 1.84321 | 0.86315 | 11.4075 | 8.52572 | 15.1941 |
| Cd248         | 3.58581 | 1.4E-10 | 1.71258 | 0.75441 | 0.36658 | 5.79339 | 6.01174 | 5.43679 |
| Pcna          | 3.58488 | 2.1E-08 | 3.46322 | 2.38193 | 1.30339 | 14.9187 | 11.3474 | 14.4981 |
| Hist1h4h      | 3.5784  | 1.8E-05 | 27.2275 | 16.3323 | 5.51118 | 90.3221 | 40.7421 | 89.2252 |
| Hmox2         | 3.57839 | 0.00013 | 3.70789 | 2.33463 | 1.45801 | 9.26075 | 7.03239 | 10.3957 |
| Fabp5         | 3.57705 | 0.00012 | 1.35713 | 0.88795 | 0.46772 | 7.57103 | 4.0707  | 6.35637 |
| Fam57a        | 3.57608 | 0.01577 | 0.59373 | 0.39706 | 0.18915 | 1.11265 | 0.83958 | 1.09726 |
| F2r           | 3.57038 | 3.6E-07 | 16.1298 | 11.7968 | 2.2702  | 58.1847 | 48.9052 | 64.4656 |
| Egr2          | 3.56774 | 1.7E-05 | 0.672   | 0.79571 | 0.18412 | 4.51122 | 3.09164 | 2.68662 |

|               |         |         |         |         |         |         |         |         |
|---------------|---------|---------|---------|---------|---------|---------|---------|---------|
| Clec12a       | 3.5599  | 5.4E-05 | 0.33045 | 0.20962 | 0.11317 | 1.76191 | 0.98046 | 1.36717 |
| Lamtor5       | 3.55681 | 5.4E-05 | 3.09969 | 1.83517 | 0.82568 | 10.3919 | 7.87215 | 12.4433 |
| Spry4         | 3.55163 | 1E-10   | 3.28552 | 2.22307 | 0.40918 | 13.7656 | 10.08   | 10.31   |
| Ltbp2         | 3.5371  | 3.3E-15 | 5.88159 | 6.49428 | 2.06402 | 31.0644 | 29.107  | 24.495  |
| Nxpe5         | 3.53611 | 0.00172 | 0.1021  | 0.12089 | 0.02331 | 0.47014 | 0.59838 | 0.5186  |
| Col5a3        | 3.53561 | 0.00012 | 0.48291 | 0.7715  | 0.47473 | 2.99903 | 5.73908 | 2.42873 |
| Atp6v0c       | 3.53318 | 3.1E-05 | 10.0946 | 6.55179 | 2.68074 | 30.0412 | 22.8581 | 31.3335 |
| Usmg5         | 3.53161 | 0.04293 | 9.10697 | 2.26545 | 1.22313 | 25.4791 | 13.3434 | 34.2326 |
| Dlgap5        | 3.51565 | 0.0026  | 0.0412  | 0.10455 | 0.14112 | 0.52427 | 0.81503 | 0.49511 |
| Postn         | 3.51564 | 3.2E-08 | 4.9332  | 2.92069 | 1.07842 | 18.9893 | 13.864  | 19.1673 |
| Sgk1          | 3.51321 | 1.9E-13 | 5.30924 | 3.35603 | 1.46741 | 15.9484 | 20.9079 | 23.1065 |
| Ndnf          | 3.51133 | 5.9E-08 | 4.09096 | 4.39191 | 1.01034 | 18.7074 | 11.7035 | 26.287  |
| 2200002D01Rik | 3.51126 | 0.00051 | 1.46    | 0.69151 | 0.6667  | 3.32605 | 3.16597 | 5.40644 |
| Psm2          | 3.50763 | 9.3E-05 | 8.70803 | 5.81025 | 1.10457 | 30.3666 | 23.1078 | 35.9876 |
| Vstm4         | 3.49354 | 1.1E-09 | 1.49952 | 1.26827 | 0.6467  | 7.10676 | 5.59035 | 8.65406 |
| Csf2rb2       | 3.48272 | 5E-06   | 0.59413 | 1.07201 | 0.42957 | 5.42359 | 3.80123 | 4.62408 |
| Olr1          | 3.47581 | 7.7E-06 | 0.51141 | 0.36766 | 0.05838 | 2.15348 | 1.87327 | 1.5921  |
| Tnfrsf9       | 3.47163 | 0.04789 | 0.06711 | 0.28381 | 0.22984 | 1.13851 | 0.9833  | 0.82471 |
| Psm6          | 3.46269 | 7.7E-06 | 6.3655  | 3.75616 | 2.19697 | 24.9343 | 18.1111 | 32.0782 |
| Psrc1         | 3.46131 | 0.00069 | 0.1213  | 0.48731 | 0.45004 | 2.37013 | 2.15491 | 2.55889 |
| Gm6377        | 3.461   | 0.00134 | 0.13072 | 0.16584 | 0       | 0.83158 | 0.59851 | 0.56222 |
| Gcnt4         | 3.45605 | 0.02152 | 0.07174 | 0.03034 | 0.02047 | 0.23905 | 0.31532 | 0.191   |
| Gprc6a        | 3.45445 | 0.01111 | 0.09594 | 0.1082  | 0       | 0.5813  | 0.21086 | 0.55021 |
| Rps11         | 3.44914 | 2.5E-06 | 32.5225 | 16.7007 | 11.2107 | 145.035 | 77.1244 | 153.81  |
| Hist1h4f      | 3.44639 | 3.5E-07 | 7.2416  | 8.10057 | 8.80041 | 50.3862 | 27.2103 | 37.3188 |
| AB124611      | 3.44528 | 2.2E-05 | 0.69434 | 0.8542  | 0.43236 | 4.35988 | 2.40462 | 5.84359 |
| Cdkn2b        | 3.43575 | 8.6E-09 | 0.98353 | 1.44188 | 0.59883 | 5.83988 | 6.19657 | 6.76845 |
| Lxn           | 3.43518 | 0.01915 | 1.57479 | 0.87088 | 1.03718 | 8.11015 | 4.70346 | 6.35153 |
| Dpt           | 3.43235 | 0.00044 | 12.2914 | 7.16954 | 1.57254 | 38.5838 | 24.1416 | 38.4996 |
| Pcdhgc3       | 3.43044 | 0.00065 | 0.25334 | 0.1813  | 0       | 1.01541 | 0.51395 | 1.1016  |
| C1qtnf5       | 3.42985 | 0.03159 | 1.09214 | 1.31265 | 0.26248 | 6.30366 | 3.36883 | 4.19117 |
| Ccng1         | 3.42261 | 4.5E-10 | 9.70072 | 6.99489 | 2.85025 | 41.4261 | 24.902  | 49.5592 |
| Cers6         | 3.42131 | 4.2E-11 | 2.35347 | 1.90314 | 0.55045 | 9.96062 | 8.17493 | 9.51821 |
| Gpr141        | 3.4209  | 0.00055 | 0.15963 | 0.20252 | 0.12149 | 0.78988 | 0.99405 | 1.22063 |
| Mrps18c       | 3.41258 | 0.00065 | 1.52795 | 1.07693 | 0.67835 | 6.53175 | 5.03715 | 8.27569 |
| Tmem45a       | 3.41239 | 0.00027 | 0.71731 | 0.20223 | 0.03412 | 2.08249 | 1.40133 | 1.93439 |
| Mxd3          | 3.41133 | 0.0297  | 0.13167 | 0.11137 | 0.05011 | 0.90416 | 0.41801 | 0.46746 |
| Lsm5          | 3.41056 | 0.00034 | 1.03793 | 0.78032 | 0       | 3.28406 | 2.70357 | 5.4799  |
| Capns1        | 3.40435 | 9.9E-06 | 11.3573 | 6.36228 | 2.31527 | 39.8795 | 27.5271 | 45.5559 |
| Chsy3         | 3.40078 | 1.1E-07 | 0.46744 | 0.52714 | 0.24903 | 2.62444 | 2.14597 | 2.85938 |
| Col8a1        | 3.40046 | 3.2E-06 | 0.75101 | 0.34784 | 0.28579 | 2.51348 | 2.96053 | 2.65153 |
| Cd8b1         | 3.39896 | 0.0478  | 0.06159 | 0.26046 | 0.14062 | 1.41801 | 0.49632 | 1.05961 |
| Tgfb1         | 3.39376 | 1.2E-13 | 4.56185 | 3.65974 | 1.72318 | 23.1887 | 15.6532 | 20.7202 |
| Slfn2         | 3.38536 | 2.7E-05 | 5.10481 | 5.33891 | 2.3812  | 19.6882 | 18.5379 | 20.6409 |
| Slc7a11       | 3.37665 | 9.7E-05 | 0.26941 | 0.13672 | 0.05272 | 0.92342 | 0.86278 | 0.83241 |
| Fmod          | 3.3676  | 0.02028 | 0.6907  | 0.28041 | 0.06308 | 2.5611  | 2.024   | 0.95064 |
| Rsad2         | 3.36477 | 9.3E-05 | 0.50649 | 0.49978 | 0.3132  | 2.455   | 3.89606 | 1.38316 |
| Loxl2         | 3.36402 | 5.7E-08 | 2.95728 | 2.68702 | 1.04175 | 11.4878 | 12.3799 | 9.35881 |
| Gm15832       | 3.36336 | 0.01259 | 0.44871 | 0.08434 | 0.05692 | 1.60099 | 1.42446 | 1.14367 |
| Socs3         | 3.36014 | 0.00049 | 3.98082 | 5.15724 | 3.64283 | 27.0478 | 23.6546 | 33.0531 |
| Ube2l3        | 3.35849 | 0.00526 | 3.94779 | 2.44214 | 0.98703 | 9.29085 | 6.44156 | 10.0235 |
| Ptges         | 3.35587 | 2.2E-07 | 1.46382 | 1.72937 | 0.50398 | 6.46171 | 6.40026 | 7.69038 |
| Nme2          | 3.35103 | 1E-06   | 10.374  | 6.46513 | 2.31517 | 34.168  | 27.0282 | 42.4947 |
| Nit2          | 3.3506  | 0.00014 | 0.71357 | 0.24141 | 0.40731 | 2.8967  | 2.30015 | 2.6307  |
| Cdca3         | 3.34843 | 0.00286 | 0.19122 | 0.2965  | 0.10915 | 1.33233 | 1.26075 | 1.01826 |
| Kcnk13        | 3.34762 | 1.5E-06 | 0.4696  | 0.59577 | 0.26805 | 2.18728 | 2.77372 | 3.0778  |



|               |         |         |         |         |         |         |         |         |
|---------------|---------|---------|---------|---------|---------|---------|---------|---------|
| Itga5         | 3.34742 | 1E-09   | 5.49013 | 4.05215 | 1.33802 | 18.3511 | 20.4265 | 21.8658 |
| Grn           | 3.34202 | 4.2E-09 | 9.96458 | 8.36116 | 2.91144 | 44.0775 | 36.4614 | 39.6761 |
| Hist1h4d      | 3.34136 | 3.9E-06 | 42.9961 | 29.4854 | 16.45   | 122.508 | 75.4265 | 126.048 |
| Cyb561d2      | 3.33676 | 3.8E-05 | 0.69405 | 0.19567 | 0.10564 | 1.76617 | 1.66097 | 2.35025 |
| Atp5l         | 3.33669 | 0.00301 | 20.4337 | 6.13859 | 2.54942 | 42.3505 | 23.4769 | 50.9532 |
| Capza1        | 3.3314  | 5.8E-08 | 5.55611 | 4.2702  | 1.4892  | 20.3005 | 15.9629 | 21.7501 |
| Ecscr         | 3.33106 | 1.8E-07 | 3.31642 | 3.31079 | 1.42753 | 13.1762 | 9.6387  | 13.2732 |
| Eno1          | 3.32568 | 2.5E-08 | 5.34883 | 3.57607 | 1.53141 | 23.7862 | 17.8137 | 24.6787 |
| C1qtnf6       | 3.32369 | 3.7E-10 | 1.78721 | 1.18997 | 0.56433 | 6.77349 | 6.74147 | 6.94707 |
| Tpx2          | 3.32181 | 3.8E-06 | 0.19529 | 0.51204 | 0.28983 | 2.10616 | 2.26049 | 1.72793 |
| Commd1        | 3.32094 | 0.00061 | 0.76935 | 0.46851 | 0.08783 | 1.52893 | 1.03707 | 1.37405 |
| Mmrn1         | 3.31981 | 0.00012 | 1.15184 | 0.39495 | 0.15993 | 3.15931 | 2.63411 | 3.41754 |
| Cpz           | 3.31512 | 0.00853 | 0.16274 | 0.27528 | 0       | 1.08461 | 0.71533 | 0.89995 |
| Adssl1        | 3.31238 | 1.4E-08 | 1.12884 | 1.07928 | 0.67236 | 4.93628 | 4.71018 | 7.5995  |
| Fgr           | 3.30131 | 7.6E-09 | 0.70933 | 1.07988 | 0.40489 | 4.44094 | 3.06592 | 5.83057 |
| Sparc         | 3.30124 | 4.3E-10 | 52.0103 | 54.839  | 14.6718 | 243.098 | 205.209 | 222.808 |
| Fkbp10        | 3.30024 | 5.3E-08 | 2.42737 | 1.86878 | 0.60396 | 9.05047 | 9.46134 | 9.3568  |
| F13a1         | 3.30022 | 2E-07   | 2.51196 | 1.49507 | 0.84968 | 6.42602 | 10.82   | 10.0991 |
| Cfb           | 3.29289 | 1.8E-05 | 4.4618  | 4.01983 | 2.47299 | 20.0399 | 19.5647 | 15.8134 |
| Gpr182        | 3.28312 | 2E-08   | 1.8249  | 1.3481  | 0.39557 | 6.73204 | 4.73842 | 8.76221 |
| Ckap2l        | 3.28189 | 9.4E-05 | 0.26205 | 0.39402 | 0.1662  | 1.7641  | 1.91973 | 1.45507 |
| Ier3ip1       | 3.2799  | 0.00479 | 2.98993 | 2.08017 | 0.88086 | 6.34042 | 4.59278 | 7.54611 |
| Rpl23         | 3.27829 | 1.2E-05 | 31.9424 | 15.3194 | 6.83361 | 97.9234 | 67.7072 | 110.045 |
| Gm13889       | 3.27684 | 1.9E-08 | 5.90545 | 7.71408 | 3.8952  | 28.4253 | 34.1296 | 45.3167 |
| Serpnb6b      | 3.27052 | 0.0002  | 4.77446 | 3.79236 | 0.75834 | 20.9788 | 10.9799 | 18.7412 |
| Tubb2a        | 3.26834 | 1.4E-09 | 7.78445 | 5.80364 | 1.44821 | 31.0588 | 22.4734 | 32.6432 |
| Clec4a3       | 3.2683  | 0.00138 | 0.41298 | 0.81501 | 0.31431 | 3.66986 | 2.52122 | 3.10142 |
| Gpr85         | 3.26508 | 0.01797 | 0.13422 | 0.01892 | 0       | 0.20331 | 0.36054 | 0.31156 |
| C1ra          | 3.2641  | 4E-05   | 5.36199 | 4.2241  | 1.67898 | 19.8822 | 13.1088 | 24.5497 |
| Prkcdbp       | 3.26389 | 5.8E-05 | 3.73704 | 2.2311  | 0.94108 | 11.1878 | 8.57553 | 12.4265 |
| Cnot9         | 3.26384 | 0.0097  | 2.38729 | 1.57492 | 0.89936 | 4.54174 | 3.79514 | 5.00685 |
| Ano5          | 3.26363 | 0.01031 | 0.08176 | 0.01976 | 0       | 0.15569 | 0.20536 | 0.22009 |
| Rpl36al       | 3.26229 | 0.00019 | 7.42582 | 3.4258  | 2.38907 | 24.091  | 14.4905 | 31.3032 |
| Phlda1        | 3.25816 | 2.3E-05 | 4.5151  | 2.97796 | 1.74968 | 13.9793 | 9.1342  | 17.2734 |
| Arpc3         | 3.25738 | 2.1E-06 | 4.39823 | 3.02071 | 1.17032 | 16.4096 | 11.0957 | 20.6714 |
| Anxa2         | 3.256   | 2E-09   | 16.9407 | 12.5268 | 5.30999 | 66.39   | 48.8175 | 75.5509 |
| Akr1b8        | 3.25591 | 0.00038 | 3.83874 | 0.8761  | 0.83473 | 11.1861 | 7.54393 | 11.5813 |
| Cox7b         | 3.25528 | 0.01077 | 7.97511 | 1.97266 | 0.42945 | 17.1399 | 11.2441 | 23.1144 |
| Ost4          | 3.2548  | 2.4E-07 | 5.38547 | 4.31201 | 1.88541 | 18.7947 | 11.6783 | 23.0605 |
| Hist1h3g      | 3.24979 | 0.04925 | 0.21391 | 2.17101 | 0.73259 | 7.51689 | 3.13411 | 8.58693 |
| Fzd1          | 3.24856 | 4.4E-14 | 4.41781 | 2.76096 | 1.41612 | 19.0268 | 12.7067 | 16.7772 |
| C330027C09Rik | 3.24176 | 0.00016 | 0.17664 | 0.16298 | 0.10999 | 0.97292 | 0.89406 | 0.7104  |
| Aurka         | 3.23873 | 0.00026 | 0.14435 | 0.36627 | 0.0824  | 1.13697 | 1.11037 | 1.35999 |
| Ccl21a        | 3.23268 | 0.01182 | 11.9684 | 5.68289 | 2.27719 | 31.3592 | 19.1511 | 30.5336 |
| H2-Eb2        | 3.22537 | 0.00846 | 0.45483 | 0.13989 | 0.0472  | 1.55322 | 1.30252 | 0.60974 |
| Cotl1         | 3.22399 | 2.3E-07 | 7.95484 | 10.0195 | 6.27197 | 56.8308 | 36.8526 | 55.5591 |
| Atp5k         | 3.21815 | 0.00361 | 5.93101 | 2.38276 | 1.1849  | 15.9911 | 9.01592 | 27.5749 |
| Ccne1         | 3.21781 | 0.004   | 0.17156 | 0.26118 | 0.11751 | 1.06023 | 1.20655 | 0.92763 |
| Cst3          | 3.2152  | 0.00031 | 40.9793 | 29.4118 | 7.24794 | 171.702 | 81.3953 | 156.632 |
| Gas2l3        | 3.21448 | 0.00011 | 0.21657 | 0.32055 | 0.04636 | 1.35315 | 1.11059 | 0.83168 |
| Mcm4          | 3.21285 | 5.2E-07 | 1.32336 | 0.77489 | 0.58106 | 5.50469 | 4.53049 | 5.17068 |
| Rps25         | 3.20445 | 3.6E-06 | 14.7319 | 7.11998 | 4.28094 | 43.7943 | 29.9106 | 55.5809 |
| Asah1         | 3.20416 | 4.2E-06 | 6.81664 | 3.4638  | 1.13807 | 20.1607 | 16.4816 | 22.7356 |
| Prelp         | 3.20292 | 0.00037 | 18.8992 | 13.0142 | 2.88441 | 44.9914 | 24.0629 | 37.1557 |
| Rpl34         | 3.20157 | 4E-07   | 11.3548 | 6.36729 | 3.03888 | 36.8932 | 23.2795 | 46.4103 |
| Siglec1       | 3.20099 | 3.4E-07 | 0.95903 | 0.94091 | 0.56931 | 4.36955 | 5.78922 | 3.92844 |

|           |         |         |         |         |         |         |         |         |
|-----------|---------|---------|---------|---------|---------|---------|---------|---------|
| Clmp      | 3.19998 | 3.7E-06 | 1.07433 | 0.45432 | 0.22712 | 3.08582 | 2.88583 | 3.76508 |
| Ctsk      | 3.19609 | 1.2E-06 | 3.68492 | 2.14588 | 0.96548 | 11.2363 | 14.2943 | 11.0363 |
| Col4a2    | 3.19163 | 4.5E-14 | 27.4468 | 30.4385 | 10.0034 | 119.668 | 116.216 | 136.08  |
| Tmem254a  | 3.18617 | 0.02622 | 3.42088 | 1.32266 | 0.66948 | 6.48444 | 4.86903 | 5.40498 |
| Rps15a    | 3.18615 | 5.6E-07 | 3.75839 | 1.57707 | 0.94792 | 14.1306 | 7.88659 | 15.3238 |
| Cdh5      | 3.17859 | 0.00025 | 25.904  | 19.0418 | 3.59728 | 89.0204 | 59.5899 | 97.1904 |
| Arntl     | 3.1746  | 0.00056 | 0.32196 | 0.46083 | 0.08482 | 1.56056 | 1.8325  | 1.46087 |
| Tnfrsf10b | 3.17089 | 4.1E-08 | 1.03695 | 0.77958 | 0.39459 | 4.32806 | 2.86982 | 5.82868 |
| Pou2af1   | 3.15981 | 1.3E-05 | 1.14665 | 0.93951 | 0.16363 | 4.55919 | 4.06888 | 3.46403 |
| Itgb2     | 3.15867 | 4.9E-07 | 4.12994 | 7.82136 | 2.15239 | 29.5013 | 21.2886 | 29.3235 |
| Lrp12     | 3.15601 | 1.5E-09 | 0.71888 | 0.7938  | 0.31915 | 3.85951 | 3.10136 | 3.35372 |
| Bcl2a1a   | 3.15475 | 0.02283 | 0.66914 | 1.13189 | 0       | 5.13532 | 1.38892 | 4.56831 |
| Sla       | 3.14886 | 0.00026 | 1.50141 | 2.03515 | 0.70377 | 4.96408 | 4.90231 | 6.26425 |
| Vgll3     | 3.14853 | 7.1E-05 | 1.75966 | 0.88367 | 0.15694 | 5.54731 | 4.71334 | 3.89687 |
| Cd300lf   | 3.14368 | 0.00211 | 0.67408 | 1.03522 | 0.68853 | 3.29954 | 5.17217 | 5.02832 |
| Cyba      | 3.14012 | 1E-08   | 9.84582 | 7.80696 | 3.01073 | 44.0482 | 26.0183 | 43.2121 |
| Gpx7      | 3.14012 | 0.00016 | 0.99203 | 0.59932 | 0.48536 | 4.12151 | 3.21848 | 4.17974 |
| Ctsl      | 3.13739 | 1E-08   | 15.1998 | 8.19159 | 3.12127 | 44.6144 | 43.0472 | 48.8229 |
| Fkbp7     | 3.1346  | 0.00058 | 1.8452  | 0.62426 | 0.21065 | 4.99363 | 3.64982 | 5.4421  |
| Naa38     | 3.13383 | 9.9E-05 | 1.64202 | 1.0416  | 0.46864 | 7.15065 | 3.75917 | 7.90328 |
| Rac2      | 3.12923 | 8.1E-05 | 1.5945  | 1.78117 | 0.78994 | 8.6947  | 5.20143 | 9.88353 |
| Spi1      | 3.12861 | 4.6E-06 | 1.22009 | 1.5479  | 1.08334 | 8.06997 | 5.95888 | 8.66294 |
| Arg2      | 3.12086 | 0.01391 | 0.8315  | 0.48688 | 0.21906 | 1.7439  | 2.15547 | 4.66371 |
| Slc37a2   | 3.11619 | 8.2E-06 | 0.38498 | 0.34887 | 0.32963 | 2.4825  | 1.7728  | 1.85861 |
| Epha3     | 3.11499 | 0.00081 | 0.54877 | 0.27302 | 0.0737  | 1.72112 | 1.47803 | 1.42808 |
| Cmc1      | 3.11402 | 0.00428 | 2.34399 | 0.85909 | 0.26759 | 4.26055 | 3.66335 | 4.28874 |
| Rab5c     | 3.11251 | 2.3E-06 | 10.9072 | 7.99277 | 2.56639 | 37.8097 | 30.0713 | 44.2016 |
| Yif1b     | 3.10816 | 0.00015 | 2.27841 | 1.24691 | 0.38251 | 7.91729 | 4.95836 | 8.94873 |
| Inhba     | 3.10445 | 0.00038 | 0.59969 | 0.46819 | 0.21065 | 2.5993  | 2.02768 | 2.41871 |
| Atp5j2    | 3.09896 | 0.00491 | 6.60361 | 2.3847  | 1.35528 | 18.1169 | 10.1647 | 25.8345 |
| Psmb3     | 3.0984  | 1.9E-07 | 3.09754 | 1.51145 | 0.99738 | 10.4424 | 7.15681 | 12.1353 |
| Gla       | 3.09667 | 8.7E-08 | 0.64342 | 0.82812 | 0.19162 | 3.44073 | 2.82819 | 2.93357 |
| Lcp1      | 3.09663 | 4.4E-07 | 4.99743 | 4.80385 | 1.48113 | 22.7322 | 14.8485 | 21.1401 |
| Ctsz      | 3.08667 | 1.7E-09 | 12.8037 | 12.7055 | 5.64412 | 67.4754 | 45.5995 | 58.3676 |
| Rpp30     | 3.08319 | 0.00535 | 0.7908  | 0.33442 | 0.27083 | 2.10818 | 1.85388 | 3.69286 |
| Ppia      | 3.07866 | 3.7E-06 | 19.3454 | 12.3101 | 4.75583 | 71.5727 | 44.0048 | 79.6071 |
| Cfp       | 3.07749 | 1.1E-07 | 2.42024 | 1.3795  | 0.8409  | 10.4878 | 5.93586 | 8.70705 |
| Nop10     | 3.07446 | 0.00142 | 1.64721 | 1.46284 | 0.65816 | 8.18371 | 3.19784 | 9.78376 |
| Ly96      | 3.07265 | 0.01588 | 0.26838 | 0.52964 | 0       | 1.73445 | 1.11413 | 1.83225 |
| Bank1     | 3.07223 | 0.01846 | 0.41484 | 0.29927 | 0.22286 | 2.3508  | 1.09049 | 0.59975 |
| Tubb5     | 3.07221 | 1.3E-09 | 18.0369 | 15.3482 | 6.98904 | 82.4692 | 57.4002 | 78.4725 |
| Nfam1     | 3.07102 | 1.3E-05 | 1.38906 | 1.89413 | 0.38835 | 6.68132 | 4.50658 | 8.70914 |
| Hist1h1b  | 3.06945 | 0.00266 | 2.21275 | 2.91124 | 2.52609 | 13.9281 | 15.4    | 15.2075 |
| Clcn5     | 3.06676 | 1.3E-13 | 0.83745 | 0.55315 | 0.20031 | 2.66261 | 2.61179 | 3.10371 |
| Rrm2      | 3.06654 | 0.00078 | 0.42851 | 0.94787 | 0.48918 | 3.13546 | 4.51562 | 2.83545 |
| Rpl32     | 3.06604 | 1.7E-06 | 37.4645 | 18.3704 | 7.36289 | 116.714 | 70.318  | 134.195 |
| Napsa     | 3.06401 | 5.6E-05 | 8.30966 | 11.0069 | 1.99919 | 32.3509 | 20.3759 | 41.2966 |
| Tnfsf8    | 3.06292 | 0.01086 | 0.14395 | 0.20292 | 0.02739 | 0.77043 | 0.70306 | 0.58967 |
| Cfl1      | 3.06046 | 1.9E-11 | 32.166  | 26.8445 | 9.92218 | 125.279 | 96.9021 | 139.645 |
| Kctd12b   | 3.06    | 0.00061 | 0.50267 | 0.31493 | 0.06376 | 1.5228  | 1.22752 | 1.86081 |
| Gpr35     | 3.05771 | 3.7E-06 | 0.60401 | 0.47893 | 0.17239 | 3.24789 | 1.5349  | 1.97936 |
| Blvrb     | 3.05376 | 0.00034 | 1.67947 | 0.6556  | 0.22123 | 4.10939 | 3.54915 | 5.66244 |
| Mrc2      | 3.05356 | 7.5E-12 | 4.62573 | 4.00496 | 1.07802 | 18.8308 | 13.8358 | 17.1319 |
| Dusp6     | 3.0526  | 1E-08   | 10.4208 | 5.69165 | 2.57322 | 38.3579 | 21.0121 | 37.7356 |
| Birc5     | 3.04691 | 0.00868 | 0.10739 | 0.24979 | 0.3065  | 1.18748 | 1.37682 | 1.18776 |
| Ccdc80    | 3.04551 | 8.4E-05 | 2.93428 | 1.58609 | 0.60447 | 9.81146 | 8.84096 | 6.85028 |

|          |         |         |         |         |         |         |         |         |
|----------|---------|---------|---------|---------|---------|---------|---------|---------|
| Abcd2    | 3.04413 | 4.5E-06 | 1.02459 | 0.60102 | 0.1132  | 3.20404 | 2.27605 | 3.37116 |
| Sec61b   | 3.0441  | 9.7E-05 | 4.59922 | 2.43121 | 1.80486 | 15.5875 | 10.1607 | 20.1938 |
| Slc6a14  | 3.04372 | 2.1E-05 | 3.00558 | 2.3171  | 0.48583 | 10.1043 | 6.66405 | 12.8129 |
| Pik3cg   | 3.03787 | 1.1E-07 | 1.1037  | 0.99041 | 0.23049 | 4.37924 | 3.43145 | 4.23435 |
| Apoc1    | 3.03612 | 0.00591 | 1.81356 | 0.55777 | 0.37643 | 4.59501 | 3.86503 | 6.07816 |
| P2ry14   | 3.03466 | 0.02731 | 0.84825 | 0.78687 | 0.46857 | 2.20497 | 1.68386 | 2.24173 |
| Kif18b   | 3.02812 | 0.0105  | 0.07671 | 0.21627 | 0.11677 | 0.8366  | 0.86171 | 0.50277 |
| Sh3pxd2b | 3.02632 | 2.3E-14 | 2.13551 | 2.58593 | 1.13841 | 10.824  | 9.73134 | 11.3758 |
| Tgfbr2   | 3.02372 | 2E-11   | 10.197  | 8.0677  | 3.06943 | 37.8396 | 30.2814 | 42.0621 |
| Heyl     | 3.02304 | 1.4E-06 | 2.41161 | 2.10014 | 0.42826 | 8.46387 | 8.91218 | 7.01018 |
| Srgn     | 3.02126 | 3.8E-06 | 6.03094 | 5.10087 | 0.94965 | 19.127  | 17.4291 | 23.5118 |
| Actb     | 3.01941 | 1.9E-08 | 306.811 | 235.331 | 85.7836 | 1166.56 | 833.307 | 1216.26 |
| Itga2    | 3.01485 | 2.1E-06 | 1.34384 | 0.91661 | 0.14846 | 4.26802 | 3.06461 | 4.91875 |
| Adam12   | 3.01007 | 0.00016 | 0.29409 | 0.24071 | 0.22743 | 1.299   | 1.93206 | 0.86269 |
| Mfsd2a   | 3.01003 | 0.00104 | 0.28416 | 0.44634 | 0.13903 | 1.37735 | 1.24905 | 2.22824 |
| Ndufa11  | 3.00275 | 0.00059 | 1.75055 | 0.929   | 0.23511 | 5.61509 | 2.56488 | 6.18653 |
| Ifi47    | 3.00225 | 0.02564 | 0.96028 | 1.46819 | 1.09626 | 4.65454 | 4.95153 | 4.44798 |
| Piwil2   | 2.99915 | 0.00983 | 0.07436 | 0.07862 | 0       | 0.29286 | 0.28601 | 0.27415 |
| Prdx1    | 2.99202 | 9.2E-05 | 12.8167 | 6.54977 | 3.11821 | 41.1003 | 28.564  | 42.099  |
| Pfn1     | 2.9852  | 8.4E-08 | 35.6982 | 23.9435 | 18.903  | 157.767 | 108     | 168.62  |
| S1pr3    | 2.98342 | 6.7E-09 | 3.70728 | 2.36028 | 0.90691 | 11.8726 | 11.2666 | 11.7984 |
| Samsn1   | 2.98118 | 0.00073 | 0.30218 | 0.37484 | 0.13799 | 1.59892 | 1.28396 | 1.48536 |
| Ctsc     | 2.98048 | 8.6E-07 | 5.61424 | 6.51745 | 1.99279 | 23.5919 | 19.6431 | 28.9112 |
| Nid1     | 2.98011 | 1.5E-07 | 10.575  | 7.42363 | 2.51797 | 35.6057 | 29.0076 | 34.5678 |
| Plin2    | 2.97817 | 1.4E-09 | 6.00768 | 6.313   | 1.98923 | 32.2553 | 21.0724 | 20.3905 |
| Sdcbp    | 2.97812 | 1.5E-08 | 6.52222 | 4.47577 | 1.67644 | 22.6041 | 16.9125 | 22.5332 |
| Cd84     | 2.9778  | 7.8E-07 | 0.99027 | 1.66278 | 0.69825 | 6.37926 | 5.89972 | 6.28744 |
| Plac8    | 2.97676 | 3.4E-06 | 1.31958 | 2.3292  | 0.91696 | 8.96839 | 7.14527 | 8.78958 |
| Ncapg2   | 2.97558 | 7.6E-08 | 0.4979  | 0.5381  | 0.18947 | 2.0279  | 2.4824  | 1.86959 |
| Fam177a  | 2.97512 | 0.00379 | 5.66545 | 2.89921 | 1.49464 | 9.41801 | 8.21375 | 12.1107 |
| Psmb7    | 2.97178 | 3.5E-06 | 2.56311 | 1.98718 | 0.73152 | 9.47944 | 6.68937 | 11.8116 |
| Col6a3   | 2.97105 | 5.9E-13 | 7.62737 | 7.89759 | 3.3993  | 31.1463 | 35.68   | 31.4253 |
| Pld4     | 2.97063 | 2.8E-07 | 2.21648 | 2.49955 | 1.15974 | 12.8138 | 8.22039 | 10.5169 |
| Rab20    | 2.9648  | 2.6E-05 | 1.18109 | 1.33193 | 0.29963 | 4.5719  | 3.70138 | 5.10686 |
| Rnf152   | 2.96363 | 0.0008  | 0.18199 | 0.10865 | 0.03666 | 0.64213 | 0.56467 | 0.41221 |
| Rpl28    | 2.96159 | 8.1E-08 | 20.5013 | 12.8053 | 5.83694 | 71.9117 | 43.6027 | 79.0177 |
| Nme1     | 2.96077 | 0.00012 | 1.58515 | 1.59496 | 0.65521 | 4.02381 | 3.94432 | 4.34375 |
| Bak1     | 2.95831 | 0.00064 | 2.20091 | 1.7652  | 1.16964 | 9.1505  | 6.92207 | 9.07771 |
| Icam1    | 2.95638 | 4.4E-09 | 11.6686 | 11.0562 | 3.27642 | 53.1186 | 35.8815 | 55.5038 |
| Srm      | 2.95423 | 4.5E-06 | 1.82789 | 1.40106 | 0.71731 | 7.06024 | 5.56565 | 8.18953 |
| Prcp     | 2.94978 | 2.2E-05 | 2.1753  | 2.19934 | 0.62797 | 9.81665 | 7.16209 | 8.23466 |
| Zfp385a  | 2.94637 | 2.6E-06 | 1.47512 | 0.91043 | 0.40962 | 5.36248 | 3.62167 | 5.45457 |
| Ntm      | 2.94544 | 0.04457 | 0.03392 | 0.02869 | 0       | 0.0959  | 0.09111 | 0.16672 |
| Snrpf    | 2.93745 | 0.0002  | 3.92508 | 1.88419 | 0.72663 | 9.89818 | 6.91671 | 9.99457 |
| Scel     | 2.9369  | 3.5E-05 | 3.14132 | 1.74595 | 0.61477 | 10.187  | 5.91765 | 11.2011 |
| Ppp1r14b | 2.93503 | 3.3E-11 | 6.36083 | 5.04364 | 3.51732 | 20.8352 | 17.9843 | 24.183  |
| Spcs1    | 2.93375 | 0.00017 | 4.96272 | 2.99813 | 0.53957 | 13.6023 | 9.17569 | 16.6502 |
| Ghrl     | 2.92978 | 0.01819 | 0.55694 | 0.47105 | 0.21193 | 2.64327 | 1.29203 | 2.6616  |
| Rps28    | 2.92857 | 3E-05   | 20.1517 | 10.2369 | 5.34178 | 71.783  | 36.4275 | 81.4225 |
| Ecm1     | 2.92468 | 3.4E-10 | 8.91275 | 6.52702 | 2.19214 | 28.7126 | 23.9678 | 34.8173 |
| Tspan8   | 2.92461 | 4.9E-07 | 5.64109 | 5.68475 | 1.37019 | 20.8706 | 18.4209 | 24.2874 |
| Pappa2   | 2.92388 | 0.00017 | 0.11535 | 0.15009 | 0.08103 | 0.66124 | 0.49402 | 0.69057 |
| Mpp1     | 2.92353 | 5E-07   | 1.48725 | 0.95426 | 0.3708  | 4.81621 | 3.86978 | 5.41995 |
| Ptgir    | 2.92051 | 0.00024 | 0.24656 | 0.48659 | 0.28148 | 2.30721 | 1.32462 | 1.84042 |
| Sell     | 2.92012 | 5.4E-06 | 0.88077 | 0.73187 | 0.33516 | 3.77296 | 2.35459 | 4.01299 |
| Dynlt1f  | 2.91765 | 0.02371 | 5.77226 | 3.06327 | 1.03367 | 15.2236 | 6.13579 | 16.3196 |



|               |         |         |         |         |         |         |         |         |
|---------------|---------|---------|---------|---------|---------|---------|---------|---------|
| Naip2         | 2.91555 | 5.7E-09 | 0.81047 | 0.84489 | 0.32276 | 3.60862 | 2.74778 | 3.25813 |
| Car2          | 2.91447 | 1.9E-06 | 2.14956 | 1.84996 | 0.77493 | 8.54546 | 5.99512 | 10.1955 |
| Rrm1          | 2.91145 | 2.7E-09 | 1.21711 | 1.32133 | 0.49772 | 4.90883 | 5.00386 | 5.58092 |
| Crip1         | 2.91142 | 5.4E-07 | 6.53656 | 4.53338 | 1.84067 | 22.099  | 15.6748 | 27.204  |
| Ppic          | 2.90702 | 3.6E-12 | 8.16782 | 9.25099 | 2.91895 | 37.2662 | 31.6876 | 34.6797 |
| Rps13         | 2.9045  | 5.7E-05 | 10.8614 | 7.14816 | 2.32489 | 32.7597 | 19.9671 | 36.0102 |
| Nsmce1        | 2.90157 | 1.7E-05 | 1.78689 | 1.10443 | 0.47075 | 5.57979 | 4.32998 | 7.31961 |
| Serpinb9      | 2.89893 | 6.6E-05 | 3.65978 | 2.4763  | 1.04451 | 11.8789 | 9.3265  | 14.606  |
| Cd34          | 2.89696 | 2.5E-07 | 6.87045 | 5.59905 | 1.51148 | 20.7375 | 17.1052 | 19.9935 |
| Disp2         | 2.89688 | 4.1E-07 | 1.28092 | 1.13189 | 0.20734 | 4.67392 | 3.16534 | 4.87112 |
| Ndufa4        | 2.89632 | 0.02169 | 9.98695 | 2.40538 | 0.52853 | 18.5935 | 11.9678 | 26.1712 |
| Fam111a       | 2.89482 | 0.03282 | 1.15141 | 1.51694 | 0.63195 | 5.16505 | 3.52005 | 4.73463 |
| 1110012L19Rik | 2.89288 | 0.00117 | 0.75141 | 0.84737 | 0.38125 | 3.6927  | 2.69121 | 3.76197 |
| Lamp1         | 2.89244 | 4.8E-05 | 37.2862 | 24.8072 | 7.71804 | 102.901 | 70.3403 | 104.537 |
| Dscr3         | 2.88774 | 1.2E-05 | 1.56792 | 1.09458 | 0.59665 | 4.43322 | 2.84427 | 4.70994 |
| Figl1         | 2.88701 | 0.0086  | 0.0755  | 0.2235  | 0.06464 | 0.60612 | 0.81585 | 0.49484 |
| Rnf125        | 2.88683 | 0.00051 | 1.23244 | 1.1582  | 0.23449 | 3.11131 | 3.61151 | 5.3289  |
| March1        | 2.8835  | 2.1E-07 | 0.63908 | 0.8216  | 0.32101 | 2.73369 | 2.37839 | 2.11523 |
| Cox7a2        | 2.88173 | 0.00075 | 8.1275  | 2.94604 | 1.65686 | 21.9249 | 12.7589 | 27.1096 |
| Cks1b         | 2.87719 | 0.00073 | 0.89229 | 1.09772 | 0.27781 | 3.93178 | 4.27865 | 3.18987 |
| Serinc3       | 2.8752  | 8.9E-05 | 55.8967 | 36.6745 | 8.14621 | 152.401 | 123.581 | 183.682 |
| Slc15a3       | 2.8741  | 8.5E-08 | 0.76517 | 1.16771 | 0.39878 | 4.86781 | 3.63143 | 3.81572 |
| Itgb6         | 2.87324 | 5.1E-10 | 1.78539 | 1.65128 | 0.45457 | 6.70833 | 5.40124 | 7.09249 |
| Ndr1          | 2.8715  | 2.6E-05 | 2.2166  | 1.66385 | 0.58517 | 4.98587 | 4.34383 | 5.92457 |
| Gm2a          | 2.87056 | 0.00021 | 4.97964 | 4.324   | 1.08642 | 19.0545 | 12.1439 | 18.6755 |
| Ccr2          | 2.86996 | 4.6E-05 | 1.27008 | 1.57703 | 0.63242 | 7.80161 | 4.385   | 5.81142 |
| Ada           | 2.86941 | 0.00097 | 0.54748 | 0.46305 | 0.15625 | 1.35447 | 2.20593 | 2.39213 |
| Ifi207        | 2.86555 | 3.2E-07 | 1.67929 | 1.79758 | 0.89863 | 7.23345 | 7.57364 | 7.24428 |
| Maged2        | 2.86383 | 1E-08   | 1.29717 | 1.35948 | 0.67604 | 5.80906 | 4.31765 | 7.18487 |
| Hist1h2bc     | 2.86275 | 1.5E-05 | 11.9136 | 7.97708 | 3.6835  | 44.2117 | 29.1837 | 42.5996 |
| Mrps36        | 2.85659 | 0.01746 | 1.72065 | 0.4851  | 0.24554 | 3.34472 | 2.3635  | 5.57986 |
| Ifi30         | 2.85383 | 7.3E-09 | 11.7434 | 14.1103 | 5.74557 | 66.0125 | 42.8791 | 53.2965 |
| Mgst3         | 2.85129 | 0.00026 | 3.33045 | 1.83094 | 0.38021 | 9.98841 | 4.94073 | 12.1418 |
| Ctbs          | 2.84792 | 0.00039 | 1.15805 | 0.82877 | 0.13559 | 3.09443 | 2.32761 | 3.62468 |
| Dtx4          | 2.847   | 2.5E-11 | 1.25163 | 1.67502 | 0.57878 | 6.94988 | 5.01415 | 5.91882 |
| Hist1h4c      | 2.83574 | 0.00013 | 26.3607 | 18.9707 | 10.0312 | 79.0169 | 44.0442 | 87.1425 |
| Cd80          | 2.83497 | 0.00223 | 0.37587 | 0.54499 | 0.4904  | 2.76537 | 2.55695 | 1.80364 |
| Rhoc          | 2.83454 | 7E-09   | 11.0079 | 8.21218 | 3.0289  | 37.3151 | 32.4228 | 37.6457 |
| Cyp4f18       | 2.8332  | 5.3E-05 | 0.98477 | 1.16606 | 0.84317 | 5.07158 | 3.31861 | 5.56679 |
| Sdk2          | 2.83253 | 1.1E-06 | 0.17714 | 0.18977 | 0.02022 | 0.64394 | 0.64885 | 0.61918 |
| Sema5a        | 2.83139 | 9.2E-07 | 1.96888 | 1.25787 | 0.4534  | 6.20519 | 5.18146 | 5.99518 |
| Cd44          | 2.83086 | 1.2E-10 | 5.70186 | 5.66619 | 2.61602 | 24.7543 | 18.3281 | 28.0388 |
| Slc35f6       | 2.82908 | 6.5E-07 | 2.20538 | 1.38324 | 0.36775 | 6.87619 | 5.19186 | 6.76018 |
| Rps16         | 2.8267  | 3.1E-06 | 39.7528 | 23.7369 | 9.63646 | 116.362 | 74.6829 | 127.966 |
| Cd151         | 2.82285 | 1.3E-07 | 8.7972  | 5.89041 | 2.16836 | 30.4662 | 17.1861 | 32.9509 |
| E2f8          | 2.82245 | 0.00402 | 0.18459 | 0.22709 | 0.15326 | 0.6507  | 1.09412 | 0.72863 |
| Csf3r         | 2.82057 | 0.01181 | 1.26541 | 1.71242 | 1.06901 | 3.8488  | 2.87381 | 16.0274 |
| C1galt1c1     | 2.82029 | 0.00751 | 2.01712 | 0.90634 | 0.50373 | 5.38504 | 4.10993 | 7.17821 |
| Degs1         | 2.81996 | 2.3E-06 | 5.46404 | 3.60767 | 1.20731 | 17.2363 | 12.9385 | 18.6856 |
| Tex30         | 2.81922 | 0.01239 | 0.42681 | 0.32088 | 0.21656 | 1.72398 | 0.97278 | 1.43752 |
| Mki67         | 2.81751 | 3.6E-05 | 1.22558 | 2.05779 | 1.31622 | 8.61368 | 9.46403 | 6.6194  |
| Lamb3         | 2.81467 | 1.1E-07 | 2.59548 | 2.30707 | 0.64167 | 9.16488 | 6.61261 | 10.9975 |
| 1110059G10Rik | 2.81281 | 0.0002  | 0.59787 | 0.2988  | 0.15512 | 1.81118 | 1.21443 | 2.18186 |
| C1s1          | 2.81272 | 0.00116 | 8.55286 | 7.28324 | 2.03278 | 25.4857 | 17.1934 | 25.4213 |
| Klhd8a        | 2.81021 | 1.8E-06 | 0.66326 | 0.48859 | 0.34195 | 2.33337 | 2.27276 | 2.85714 |
| Hcn1          | 2.80681 | 7.2E-05 | 0.10585 | 0.03837 | 0.01151 | 0.26876 | 0.17356 | 0.32211 |

|           |         |         |         |         |         |         |         |         |
|-----------|---------|---------|---------|---------|---------|---------|---------|---------|
| Col3a1    | 2.80166 | 1E-07   | 18.582  | 34.864  | 15.4134 | 120.14  | 131.27  | 104.506 |
| Vsir      | 2.79388 | 8.4E-07 | 6.35756 | 8.02716 | 2.91145 | 14.9773 | 11.3035 | 14.3569 |
| Mrpl30    | 2.79347 | 1.3E-05 | 0.96264 | 0.7184  | 0.32322 | 3.48233 | 2.53051 | 3.94325 |
| Snrpd2    | 2.7922  | 0.00171 | 3.40908 | 1.52327 | 1.24832 | 10.7562 | 6.45572 | 13.8065 |
| Gja1      | 2.78797 | 3.1E-05 | 6.53042 | 2.88606 | 1.00745 | 15.6128 | 11.594  | 20.1472 |
| Vcam1     | 2.78017 | 1.5E-06 | 3.11439 | 2.45244 | 0.75603 | 10.9747 | 9.33613 | 9.04751 |
| Rpl22l1   | 2.77666 | 0.00011 | 6.13803 | 3.56427 | 1.25502 | 17.5955 | 13.5572 | 16.7371 |
| Slc29a3   | 2.77502 | 8.8E-05 | 1.12724 | 1.17851 | 0.42895 | 5.82425 | 3.3147  | 4.16856 |
| Dpm2      | 2.77405 | 0.00111 | 1.66827 | 0.86227 | 0.21161 | 4.4081  | 3.1912  | 5.27713 |
| Polh      | 2.77385 | 2E-05   | 0.81774 | 0.66156 | 0.24353 | 3.16659 | 2.47441 | 2.79625 |
| Gpc4      | 2.77341 | 0.00032 | 2.51514 | 1.54445 | 0.39333 | 6.80528 | 5.60345 | 8.15751 |
| Rab8b     | 2.77118 | 3.1E-05 | 4.59293 | 3.1991  | 0.66092 | 14.6505 | 10.7729 | 12.5532 |
| Upp1      | 2.77091 | 0.0015  | 0.83839 | 0.43333 | 0.15952 | 3.10422 | 1.84259 | 1.90793 |
| S100a14   | 2.7698  | 0.00087 | 1.00487 | 1.11829 | 1.26792 | 4.48615 | 5.0369  | 8.4058  |
| Pdgfc     | 2.76928 | 3.5E-05 | 0.32306 | 0.28842 | 0.10245 | 1.00045 | 1.30171 | 1.19103 |
| Srxn1     | 2.76884 | 2.4E-07 | 2.75308 | 1.58887 | 0.62859 | 7.39827 | 6.80997 | 9.31381 |
| Dclre1b   | 2.76779 | 2.5E-05 | 0.57595 | 0.26654 | 0.08684 | 1.11272 | 1.09067 | 1.35324 |
| Hsd17b12  | 2.76434 | 1.8E-05 | 4.66744 | 3.11318 | 0.77976 | 12.7601 | 10.8696 | 15.6373 |
| Gm10521   | 2.76259 | 0.00123 | 0.31936 | 0.39016 | 0.04051 | 1.24697 | 1.06583 | 1.48262 |
| Hsd17b10  | 2.75903 | 0.00063 | 2.81472 | 1.54742 | 0.80332 | 8.3564  | 5.05201 | 11.7028 |
| Rps18     | 2.75785 | 1.6E-09 | 16.1702 | 10.7613 | 6.19517 | 54.6289 | 41.7973 | 63.564  |
| Gm14636   | 2.75203 | 0.00119 | 0.40398 | 0.22044 | 0.01488 | 1.14485 | 1.0215  | 0.7153  |
| Eif2s1    | 2.74969 | 0.00021 | 2.97752 | 1.54277 | 0.58184 | 7.26488 | 6.50464 | 9.33988 |
| Slc39a1   | 2.74928 | 3.1E-16 | 10.4706 | 9.05192 | 3.30811 | 37.2444 | 30.6828 | 41.8776 |
| Cmtm3     | 2.7486  | 6.8E-08 | 2.35532 | 1.73338 | 0.5238  | 8.43256 | 6.22971 | 7.09196 |
| Nipal1    | 2.74661 | 0.01624 | 0.14554 | 0.17585 | 0.04747 | 0.37792 | 0.74636 | 0.69838 |
| Ppa1      | 2.74043 | 5.4E-05 | 1.38486 | 0.69212 | 0.4671  | 4.06182 | 3.41253 | 4.69292 |
| Cd300c2   | 2.7384  | 4.4E-06 | 1.28947 | 2.42358 | 0.57247 | 8.42034 | 5.82539 | 7.27748 |
| Psmg4     | 2.73726 | 0.01581 | 1.31895 | 0.97611 | 0.75286 | 6.59283 | 3.26112 | 4.9976  |
| Tnfrsf1a  | 2.73674 | 7E-09   | 10.364  | 9.18315 | 2.41462 | 33.127  | 26.2127 | 42.3674 |
| Ctps      | 2.73589 | 6.6E-14 | 3.0299  | 3.09846 | 1.69803 | 13.4177 | 10.5939 | 14.8484 |
| Was       | 2.73518 | 9.2E-05 | 0.84394 | 0.77868 | 0.26276 | 3.74201 | 2.22014 | 3.23703 |
| Arpc1b    | 2.73515 | 2.1E-14 | 7.57129 | 6.22243 | 2.97627 | 27.1777 | 21.1925 | 29.7706 |
| Eif3i     | 2.73255 | 2.5E-07 | 2.09716 | 1.31466 | 0.78866 | 7.11555 | 5.20557 | 7.96396 |
| Uchl3     | 2.73153 | 0.00125 | 1.86805 | 0.91471 | 0.33672 | 5.53994 | 3.81744 | 5.31616 |
| Hist1h4i  | 2.73036 | 0.0286  | 1.00509 | 1.16887 | 0.28685 | 3.6538  | 3.31345 | 2.47028 |
| Tnfrsf1b  | 2.72881 | 2.2E-07 | 3.22959 | 3.96578 | 1.14704 | 15.77   | 10.8484 | 13.1705 |
| Rab3il1   | 2.72522 | 2.2E-06 | 0.64336 | 0.76521 | 0.41314 | 3.49605 | 2.69539 | 2.76717 |
| Tmem97    | 2.72257 | 0.00463 | 1.39497 | 0.84275 | 0.91001 | 5.23213 | 4.6231  | 5.27884 |
| Ace       | 2.72031 | 2.7E-05 | 46.2821 | 36.646  | 13.7464 | 140.961 | 103.718 | 160.287 |
| Slc39a10  | 2.72017 | 2.5E-05 | 1.37868 | 0.98862 | 0.32505 | 4.54885 | 3.42526 | 4.49342 |
| Snhg6     | 2.71893 | 0.00015 | 1.11582 | 1.01115 | 0.36395 | 3.81488 | 3.91203 | 4.37482 |
| Pirb      | 2.7123  | 2.1E-06 | 1.26659 | 1.60689 | 0.93287 | 6.84476 | 6.64494 | 7.48122 |
| Extl2     | 2.71145 | 0.00096 | 1.03341 | 0.38099 | 0.15125 | 2.00681 | 2.11591 | 2.99576 |
| Il4ra     | 2.70831 | 1.8E-13 | 6.78717 | 7.99289 | 3.37032 | 25.1436 | 26.1878 | 34.547  |
| Pdgfra    | 2.70511 | 1.8E-06 | 11.8819 | 8.31551 | 2.09084 | 33.7096 | 29.4648 | 33.1072 |
| Sdc3      | 2.70509 | 2.4E-09 | 7.06116 | 5.99801 | 2.66381 | 18.9148 | 16.8037 | 20.0785 |
| Aqp1      | 2.70443 | 0.00077 | 40.6447 | 29.1422 | 4.76307 | 106.003 | 73.1538 | 139.945 |
| Tmem43    | 2.70426 | 1.7E-08 | 4.16111 | 3.07218 | 1.12854 | 12.8007 | 10.1726 | 15.9339 |
| Fermt3    | 2.70419 | 3.1E-07 | 2.11838 | 2.20975 | 1.45101 | 10.1182 | 7.94062 | 10.4998 |
| Lpl       | 2.70218 | 4.5E-06 | 12.4466 | 4.5262  | 2.72545 | 22.8917 | 25.4487 | 35.2498 |
| Btk       | 2.70206 | 0.00062 | 0.40607 | 0.63784 | 0.36424 | 2.91725 | 2.06116 | 1.97231 |
| Mrps16    | 2.69983 | 0.00201 | 3.0661  | 0.95541 | 0.92113 | 9.28849 | 4.61063 | 8.99005 |
| Gm20390   | 2.69879 | 0.00339 | 2.67285 | 2.80632 | 1.47306 | 13.5139 | 13.2341 | 15.4792 |
| Cd36      | 2.69715 | 0.00331 | 35.5428 | 19.6034 | 3.92107 | 87.1872 | 57.8362 | 104.052 |
| Serpina3c | 2.69714 | 0.00409 | 0.45401 | 0.34908 | 0.23559 | 1.57542 | 1.2397  | 2.23168 |

|          |         |         |         |         |         |         |         |         |
|----------|---------|---------|---------|---------|---------|---------|---------|---------|
| Vsnl1    | 2.69556 | 0.02352 | 0.61395 | 0.31955 | 0.10783 | 1.63101 | 1.03795 | 2.28279 |
| Apip     | 2.69502 | 0.03321 | 1.64408 | 0.77252 | 0.20854 | 4.09515 | 2.60962 | 5.46251 |
| Hpgds    | 2.69392 | 0.00019 | 0.40753 | 0.36622 | 0.20354 | 1.51236 | 1.6607  | 1.48155 |
| Ndufs5   | 2.6923  | 0.00097 | 5.20412 | 3.68293 | 1.3337  | 13.3845 | 8.16965 | 16.358  |
| Crispld2 | 2.69224 | 0.0003  | 8.87181 | 5.88646 | 1.74623 | 15.6972 | 21.2772 | 24.5775 |
| Snai2    | 2.69213 | 0.0043  | 1.16927 | 0.49447 | 0.10268 | 2.91549 | 2.04265 | 3.058   |
| Calcl    | 2.69003 | 0.00423 | 31.8615 | 26.7422 | 3.43869 | 107.948 | 67.9276 | 84.6232 |
| Lypla1   | 2.68948 | 0.01792 | 1.75133 | 0.85415 | 0.48159 | 3.51635 | 2.80952 | 3.84356 |
| Col5a1   | 2.68709 | 9.1E-06 | 5.33609 | 6.50589 | 3.78276 | 23.9285 | 33.1966 | 19.2933 |
| Slc33a1  | 2.68484 | 0.00015 | 2.03373 | 1.17576 | 0.61716 | 5.00679 | 4.24338 | 5.23043 |
| Serpinh1 | 2.68464 | 0.00189 | 24.7879 | 24.6333 | 5.63399 | 101.891 | 64.2017 | 78.382  |
| Slfn8    | 2.68329 | 0.00026 | 0.60281 | 0.71757 | 0.40781 | 2.82719 | 3.63108 | 1.93886 |
| S1pr2    | 2.68329 | 2.6E-06 | 1.08181 | 0.75283 | 0.29703 | 3.83314 | 2.53809 | 3.54512 |
| S1pr1    | 2.683   | 0.00028 | 19.6409 | 11.8186 | 3.38899 | 53.3595 | 39.4318 | 58.4678 |
| Snrpd3   | 2.6816  | 0.00038 | 1.25011 | 0.5624  | 0.45547 | 3.44867 | 2.689   | 4.53245 |
| Igha     | 2.68046 | 0.00564 | 71.8582 | 36.9465 | 5.19794 | 174.731 | 128.76  | 155.632 |
| Gusb     | 2.68026 | 3.3E-09 | 2.77146 | 2.68377 | 1.07756 | 11.3527 | 8.47451 | 11.1059 |
| Tmem167  | 2.67985 | 2.5E-05 | 1.25085 | 0.82206 | 0.19297 | 3.10317 | 2.95962 | 3.83596 |
| Zfp703   | 2.67756 | 4.1E-05 | 4.68536 | 2.0725  | 1.2911  | 11.0125 | 7.85127 | 12.1332 |
| Rab32    | 2.67756 | 6.5E-05 | 1.21321 | 1.31929 | 0.49465 | 5.01419 | 5.01532 | 4.25971 |
| Tes      | 2.67481 | 0.00011 | 2.39836 | 2.31828 | 0.81488 | 6.66016 | 4.89457 | 6.90045 |
| Nabp2    | 2.67427 | 0.00011 | 1.53019 | 1.35583 | 0.49911 | 3.62016 | 2.88258 | 4.5369  |
| Adgrg2   | 2.67215 | 0.00351 | 0.39802 | 0.13173 | 0.03951 | 0.92268 | 0.62121 | 0.86483 |
| Calu     | 2.67038 | 4.2E-05 | 14.7104 | 9.59227 | 2.59393 | 39.5675 | 36.8073 | 38.5939 |
| Dhfr     | 2.66962 | 0.0016  | 0.22446 | 0.13143 | 0.13798 | 0.60675 | 0.92338 | 0.77799 |
| Cxcl16   | 2.66715 | 6E-07   | 5.17005 | 6.34175 | 1.96739 | 21.4142 | 14.2421 | 17.5864 |
| Polr2j   | 2.66143 | 0.00431 | 1.98201 | 1.46681 | 0.47139 | 6.65479 | 3.08551 | 8.52481 |
| Ckap4    | 2.66048 | 8.6E-12 | 6.15028 | 5.37686 | 2.53168 | 20.477  | 23.1781 | 21.6565 |
| Plpp1    | 2.65978 | 0.00125 | 9.32928 | 5.76435 | 0.70152 | 21.6282 | 16.9432 | 27.689  |
| Icam2    | 2.65528 | 2E-05   | 4.50931 | 3.36759 | 1.25958 | 17.3518 | 9.98077 | 14.6985 |
| Mif      | 2.65501 | 0.00617 | 8.5732  | 4.04386 | 2.82323 | 27.6699 | 16.7887 | 29.5804 |
| Slc27a6  | 2.65465 | 0.00646 | 0.47782 | 0.62174 | 0.04196 | 2.11561 | 1.61561 | 1.59595 |
| Rgs4     | 2.6508  | 3.7E-06 | 1.17931 | 0.6234  | 0.37023 | 4.5015  | 2.54867 | 2.97094 |
| Rpl12    | 2.64502 | 3.8E-10 | 11.0428 | 6.18358 | 3.27478 | 40.359  | 27.4869 | 39.827  |
| Cap1     | 2.64398 | 4.2E-07 | 14.2993 | 11.1655 | 4.05865 | 48.9886 | 34.9696 | 48.9365 |
| Lrrc8c   | 2.64042 | 5.4E-08 | 3.68739 | 3.21966 | 0.91275 | 12.3564 | 9.48536 | 13.0516 |
| F7       | 2.63815 | 9.9E-05 | 0.73699 | 1.53755 | 0.67308 | 4.37599 | 4.78724 | 5.11204 |
| Ctgf     | 2.63716 | 0.00936 | 33.5532 | 18.1181 | 5.53976 | 81.6074 | 68.4569 | 62.7454 |
| Slc31a1  | 2.63597 | 0.00017 | 4.37481 | 3.4655  | 1.72974 | 7.20194 | 6.31612 | 8.91653 |
| Plaur    | 2.63335 | 3.3E-06 | 3.76938 | 3.07    | 1.19532 | 13.2799 | 9.61383 | 14.0108 |
| Cfh      | 2.63315 | 0.00989 | 11.2588 | 5.1572  | 1.39481 | 22.9689 | 17.843  | 30.6369 |
| Nsdhl    | 2.63113 | 0.01753 | 0.92842 | 0.5957  | 0.18274 | 2.36644 | 1.5714  | 3.85554 |
| Nos2     | 2.63054 | 0.02336 | 0.08281 | 0.26264 | 0.16544 | 0.97836 | 0.86447 | 0.64449 |
| Batf     | 2.62978 | 0.02528 | 0.76513 | 0.48535 | 0.32755 | 3.01327 | 1.75166 | 2.58571 |
| Arsg     | 2.62576 | 0.00159 | 0.35076 | 0.15822 | 0.10678 | 0.89258 | 0.92507 | 0.99619 |
| Aoah     | 2.62356 | 0.0284  | 0.376   | 0.10601 | 0.32194 | 1.00618 | 1.30842 | 1.3862  |
| Armxc6   | 2.61707 | 0.03724 | 0.29393 | 0.18645 | 0.08389 | 0.71234 | 0.59215 | 1.0234  |
| Tmco1    | 2.6169  | 0.00052 | 1.74469 | 0.97294 | 0.30642 | 4.79751 | 3.28667 | 5.13624 |
| Nnmt     | 2.61587 | 0.0001  | 1.21706 | 0.58821 | 0.19849 | 2.9847  | 2.92958 | 3.22866 |
| Tmem184c | 2.61544 | 1.9E-06 | 1.50943 | 1.07806 | 0.45951 | 4.63367 | 3.95631 | 5.41362 |
| Espl1    | 2.6138  | 1.2E-05 | 0.22042 | 0.27964 | 0.11009 | 1.0684  | 0.9386  | 0.84648 |
| Arpc2    | 2.60751 | 2.7E-08 | 19.1391 | 14.5916 | 5.94958 | 64.5133 | 48.0867 | 65.4431 |
| Rps23    | 2.60682 | 0.00013 | 80.5849 | 50.8881 | 26.6196 | 180.294 | 122.851 | 202.216 |
| Rpl17    | 2.6055  | 1.4E-05 | 76.4879 | 44.5568 | 17.7598 | 198.367 | 128.215 | 195.135 |
| Gpm6b    | 2.60317 | 7.7E-05 | 2.96847 | 1.79334 | 0.42826 | 7.97487 | 6.4882  | 7.37599 |
| Haus3    | 2.60245 | 0.00409 | 1.65167 | 1.31713 | 0.53873 | 2.41603 | 3.19787 | 2.60964 |



|               |         |         |         |         |         |         |         |         |
|---------------|---------|---------|---------|---------|---------|---------|---------|---------|
| Arpc4         | 2.60138 | 1.9E-08 | 9.68076 | 7.78841 | 3.23462 | 26.7997 | 21.1032 | 29.822  |
| Ii33          | 2.60122 | 0.02309 | 4.2409  | 4.33638 | 1.30068 | 17.4687 | 9.04234 | 18.1238 |
| Nckap1l       | 2.60045 | 2E-07   | 3.21434 | 3.65214 | 1.41475 | 15.322  | 11.0789 | 11.7233 |
| Eif4ebp1      | 2.59952 | 0.00551 | 2.78671 | 1.02017 | 0.66475 | 6.45128 | 5.05811 | 8.2121  |
| Rnf130        | 2.59829 | 0.00185 | 5.39349 | 3.86755 | 1.0039  | 16.4101 | 11.9396 | 16.0897 |
| Peg10         | 2.59813 | 0.00257 | 0.2466  | 0.22016 | 0.03128 | 0.71385 | 0.73266 | 0.80811 |
| Selp1g        | 2.59813 | 0.00102 | 3.15865 | 3.11679 | 1.80296 | 13.7685 | 7.90618 | 17.3954 |
| Rpl7l1        | 2.59788 | 0.0004  | 5.29239 | 2.8458  | 1.52046 | 10.7877 | 8.03679 | 11.4856 |
| Cd63          | 2.5954  | 1.7E-09 | 28.2606 | 24.2021 | 8.89999 | 109.66  | 81.1916 | 104.877 |
| H3f3a         | 2.59426 | 0.00055 | 8.39347 | 3.81408 | 1.45813 | 24.8113 | 14.1885 | 30.0042 |
| Cd9           | 2.59346 | 0.00021 | 14.2994 | 8.88168 | 4.74425 | 44.104  | 27.5641 | 55.1332 |
| Nt5e          | 2.59329 | 1.4E-05 | 3.27351 | 1.9552  | 1.05947 | 9.71233 | 8.18338 | 10.2574 |
| Vps29         | 2.59196 | 1.7E-05 | 2.27679 | 1.30045 | 0.64136 | 6.64651 | 4.87391 | 6.73436 |
| Tmbim1        | 2.59065 | 0.00242 | 4.47344 | 3.02685 | 0.93901 | 5.86229 | 4.73082 | 5.95841 |
| Cox6a1        | 2.59022 | 9.2E-06 | 19.2564 | 10.1242 | 5.49579 | 58.099  | 33.8379 | 64.9157 |
| Pros1         | 2.58743 | 5.1E-05 | 7.61891 | 5.12114 | 1.45388 | 20.7524 | 17.1539 | 22.24   |
| Ii21r         | 2.58512 | 0.01267 | 0.32974 | 0.53453 | 0.28232 | 2.46399 | 1.73121 | 1.21563 |
| Rcn3          | 2.58467 | 0.00012 | 7.07507 | 3.95932 | 1.51822 | 19.7896 | 17.1473 | 16.343  |
| Diaph3        | 2.58119 | 0.00012 | 0.27895 | 0.60669 | 0.27296 | 1.7505  | 2.07279 | 1.63239 |
| Plrg1         | 2.57823 | 2.6E-05 | 2.23803 | 1.12476 | 0.40731 | 6.11175 | 4.1108  | 6.29775 |
| Pdgfrb        | 2.57512 | 2.8E-07 | 7.03623 | 5.48575 | 1.50373 | 20.8004 | 17.5773 | 21.3641 |
| Mrpl52        | 2.57134 | 8.1E-06 | 3.37395 | 3.87278 | 2.20098 | 16.5728 | 10.9462 | 16.6835 |
| 1110008P14Rik | 2.57079 | 0.03872 | 1.01712 | 0.91762 | 0.69669 | 2.34178 | 1.96219 | 3.11093 |
| Slfn10-ps     | 2.56951 | 0.01019 | 0.37837 | 0.21334 | 0.11519 | 0.96283 | 1.47834 | 0.66129 |
| Hist2h2ac     | 2.569   | 0.00715 | 7.72857 | 5.49676 | 1.60418 | 15.9634 | 10.5517 | 27.0535 |
| Gng11         | 2.5679  | 7.8E-08 | 4.27368 | 3.95085 | 1.475   | 17.162  | 10.9945 | 16.2849 |
| Acp1          | 2.56721 | 3.1E-06 | 2.07005 | 1.22317 | 0.48559 | 5.27455 | 4.52875 | 6.27253 |
| Apobec1       | 2.56672 | 0.0004  | 1.25074 | 1.97275 | 0.8104  | 6.5949  | 7.13214 | 4.81874 |
| Adam10        | 2.56577 | 5.4E-06 | 7.00881 | 5.22035 | 1.31586 | 19.6556 | 15.8805 | 21.5211 |
| Slamf9        | 2.56478 | 0.00031 | 0.9739  | 1.05905 | 0.71473 | 4.97342 | 3.51639 | 4.10334 |
| Prmt1         | 2.55988 | 9E-08   | 1.89342 | 1.37587 | 0.60888 | 5.7198  | 4.53252 | 7.25349 |
| Gprc5a        | 2.55913 | 6.4E-05 | 33.6322 | 22.0295 | 6.6077  | 84.9625 | 63.5403 | 113.986 |
| Rpl21         | 2.5585  | 0.00084 | 12.8141 | 7.77062 | 2.69879 | 32.1785 | 20.8809 | 43.5989 |
| Esco2         | 2.55679 | 0.04469 | 0.09111 | 0.13485 | 0.10401 | 0.45542 | 0.66746 | 0.37321 |
| Rps6ka3       | 2.55574 | 8.7E-05 | 3.94018 | 2.33927 | 0.71419 | 9.97474 | 7.94405 | 11.2666 |
| Ntrk2         | 2.55422 | 6.7E-05 | 0.56896 | 0.35811 | 0.13595 | 1.87994 | 1.6818  | 0.95935 |
| Pdzrn3        | 2.55417 | 1.8E-08 | 2.20288 | 1.84186 | 1.00593 | 6.3531  | 6.8149  | 5.21822 |
| Phlda3        | 2.55341 | 1.1E-09 | 7.382   | 6.14446 | 3.47795 | 25.1319 | 20.9453 | 31.9667 |
| Ppp2ca        | 2.5517  | 0.00014 | 6.03633 | 4.10497 | 1.41999 | 10.4917 | 9.03196 | 12.678  |
| Cox8a         | 2.55169 | 0.00208 | 21.2842 | 10.7727 | 7.07898 | 62.5493 | 33.0269 | 82.9297 |
| D8Ert82e      | 2.55128 | 2.3E-05 | 0.31378 | 0.21713 | 0.13026 | 1.00817 | 1.0588  | 0.87246 |
| Efemp2        | 2.54894 | 2.7E-10 | 3.20785 | 2.82984 | 0.90568 | 10.4076 | 8.92009 | 11.6426 |
| Trim59        | 2.54475 | 0.00954 | 0.46323 | 0.36874 | 0.09332 | 1.53538 | 1.25762 | 1.18315 |
| Tmem126a      | 2.54414 | 0.00643 | 2.24306 | 0.37943 | 0.40971 | 4.72944 | 3.61516 | 4.63087 |
| Tgds          | 2.5402  | 0.00561 | 1.20977 | 0.40928 | 0.36829 | 2.1745  | 1.59528 | 2.51082 |
| Myl12b        | 2.53625 | 0.00039 | 19.9651 | 14.4029 | 6.09418 | 57.992  | 28.2749 | 67.5691 |
| Cxx1b         | 2.53489 | 0.00959 | 12.8258 | 7.77534 | 3.38544 | 33.0153 | 17.8146 | 27.2105 |
| Cdc42ep2      | 2.53475 | 0.00536 | 3.06296 | 1.91705 | 0.2098  | 8.72224 | 3.76976 | 9.43517 |
| Enpp1         | 2.53031 | 1.9E-05 | 0.27605 | 0.25607 | 0.11182 | 1.00893 | 0.98507 | 0.87545 |
| Timp3         | 2.5263  | 0.0192  | 54.7756 | 28.2485 | 5.23662 | 78.2192 | 64.6292 | 67.6989 |
| Dynlrb1       | 2.52494 | 0.00099 | 7.5134  | 4.13438 | 2.58353 | 24.4066 | 13.2633 | 25.8824 |
| Selenof       | 2.52451 | 0.00037 | 18.7103 | 9.91348 | 3.66734 | 45.2398 | 36.8914 | 51.2137 |
| Psmb2         | 2.524   | 0.00202 | 5.1586  | 3.5931  | 1.73208 | 15.1679 | 9.50347 | 22.3119 |
| Dck           | 2.52263 | 0.00017 | 0.74186 | 0.75294 | 0.44039 | 3.05646 | 3.10871 | 2.50402 |
| Brix1         | 2.52219 | 2.4E-07 | 1.60535 | 0.8769  | 0.41999 | 4.13377 | 3.4302  | 5.26077 |
| Nusap1        | 2.51793 | 0.0169  | 0.22502 | 0.28548 | 0.28258 | 1.43156 | 1.10451 | 1.14299 |

|               |         |         |         |         |         |         |         |         |
|---------------|---------|---------|---------|---------|---------|---------|---------|---------|
| Tlr2          | 2.51627 | 0.00058 | 1.51522 | 1.43533 | 0.72651 | 6.11419 | 4.50677 | 6.00816 |
| Thyn1         | 2.51427 | 1.1E-05 | 1.23699 | 1.01247 | 0.36443 | 4.7144  | 2.80632 | 4.15171 |
| Serpnb6a      | 2.51377 | 0.00043 | 3.73186 | 2.3137  | 0.94459 | 9.7809  | 7.97912 | 10.2788 |
| Psmb1         | 2.51298 | 1.8E-05 | 9.16902 | 5.66712 | 3.92528 | 29.9668 | 19.5056 | 35.5365 |
| Racgap1       | 2.51054 | 0.00033 | 0.21934 | 0.4256  | 0.23568 | 1.35242 | 1.56909 | 1.12048 |
| Mmp2          | 2.50758 | 2E-06   | 7.64082 | 10.45   | 3.12412 | 32.5538 | 23.6608 | 37.7585 |
| Clu           | 2.50753 | 4.2E-07 | 13.0179 | 8.08919 | 3.21489 | 41.2393 | 23.7836 | 38.2198 |
| Osmr          | 2.50555 | 3E-05   | 3.04635 | 2.32144 | 0.98134 | 9.77687 | 7.25866 | 10.4401 |
| Ubb           | 2.50509 | 0.00011 | 85.9391 | 52.3467 | 31.0636 | 258.891 | 158.794 | 289.264 |
| Ssr2          | 2.50505 | 8.9E-07 | 5.6841  | 4.14441 | 3.02074 | 19.5055 | 15.9386 | 23.0428 |
| Fdps          | 2.50253 | 0.00306 | 3.5113  | 2.07886 | 1.85394 | 7.36624 | 5.59487 | 9.81658 |
| Hsd17b7       | 2.50186 | 1.1E-06 | 0.82318 | 0.45407 | 0.26558 | 2.21186 | 1.8354  | 2.72692 |
| Ly6e          | 2.50138 | 3.9E-05 | 30.3749 | 26.9764 | 11.0033 | 114.659 | 70.0763 | 115.282 |
| Tnfrsf13b     | 2.50024 | 0.00136 | 0.64413 | 0.73547 | 0.1103  | 2.94652 | 2.00551 | 1.55674 |
| Rpl10         | 2.50023 | 0.00011 | 16.0163 | 7.26234 | 4.06318 | 48.0888 | 26.4655 | 56.5682 |
| Psmd14        | 2.49925 | 2.4E-07 | 2.65592 | 1.61626 | 0.73951 | 7.22165 | 6.12186 | 8.38509 |
| Cdca2         | 2.49778 | 0.00697 | 0.11187 | 0.16221 | 0.16421 | 0.71656 | 0.67909 | 0.54992 |
| Cenpq         | 2.497   | 0.01628 | 0.24553 | 0.29667 | 0.08009 | 1.08384 | 0.87368 | 0.80461 |
| Gimp          | 2.49554 | 6E-05   | 1.69836 | 1.39691 | 0.7293  | 6.15517 | 4.01799 | 5.6677  |
| Ccnb2         | 2.49554 | 0.00775 | 0.65625 | 1.00917 | 0.20432 | 2.53023 | 3.32163 | 2.44379 |
| Ostc          | 2.49182 | 3.7E-06 | 6.07776 | 4.70606 | 2.34538 | 19.6049 | 16.9321 | 21.2495 |
| Ddt           | 2.4896  | 0.00266 | 2.3632  | 1.599   | 0.13489 | 7.01592 | 4.15503 | 7.93787 |
| Ap3s1         | 2.4887  | 2E-05   | 3.89065 | 2.03706 | 0.70501 | 8.64334 | 7.73643 | 9.66351 |
| Armxc4        | 2.48618 | 5.4E-05 | 2.67296 | 2.995   | 1.05628 | 11.4334 | 10.427  | 6.87835 |
| Tmed5         | 2.48509 | 1.9E-05 | 1.52071 | 1.02493 | 0.31195 | 3.82225 | 3.21163 | 4.58434 |
| Pgam1         | 2.48423 | 1.4E-06 | 11.0244 | 7.76315 | 3.87245 | 35.4828 | 28.3587 | 35.4732 |
| Ccdc86        | 2.48288 | 6.7E-06 | 0.84095 | 0.68831 | 0.43356 | 2.46539 | 2.74251 | 3.77812 |
| Sirpa         | 2.48049 | 1.4E-08 | 5.2448  | 6.44944 | 2.12322 | 22.5484 | 17.4402 | 20.1433 |
| Sgpl1         | 2.4791  | 1.3E-07 | 3.10753 | 2.10012 | 0.93357 | 9.05365 | 7.81    | 9.25769 |
| Rps8          | 2.47785 | 1.3E-05 | 44.3458 | 26.5413 | 10.8742 | 108.66  | 78.8926 | 122.171 |
| Rhoh          | 2.4778  | 0.00574 | 0.16821 | 0.29747 | 0.08729 | 1.00989 | 0.82899 | 0.62639 |
| Jam2          | 2.47741 | 0.00435 | 3.54649 | 1.63134 | 0.31963 | 8.02013 | 5.86859 | 7.25096 |
| Bard1         | 2.47631 | 0.0042  | 0.2421  | 0.15016 | 0.0737  | 0.75299 | 0.68581 | 0.56859 |
| 1110038B12Rik | 2.47505 | 0.00026 | 0.90783 | 0.63985 | 0.17273 | 2.47517 | 2.17995 | 2.93366 |
| Krtcap2       | 2.47435 | 0.00015 | 3.36065 | 2.38557 | 1.23317 | 10.5444 | 5.80326 | 13.4712 |
| Taf9b         | 2.47406 | 0.00695 | 1.24367 | 0.75833 | 0.09905 | 2.97903 | 2.2036  | 3.43578 |
| Ddah1         | 2.46935 | 7.6E-07 | 1.62816 | 1.45465 | 0.52358 | 6.30788 | 3.69594 | 5.74885 |
| Rpl38         | 2.46694 | 2E-05   | 62.0152 | 31.9269 | 15.3906 | 163.569 | 95.5552 | 181.55  |
| Sf3b4         | 2.46663 | 0.00234 | 2.99952 | 1.21487 | 0.96458 | 8.42128 | 5.50905 | 9.10269 |
| Smc2          | 2.46571 | 6.5E-06 | 0.78366 | 0.91664 | 0.39973 | 2.99025 | 3.17588 | 3.05982 |
| Gpx1          | 2.46379 | 3E-09   | 25.9017 | 19.2409 | 8.5596  | 84.352  | 58.0498 | 88.4405 |
| Fam206a       | 2.46356 | 3.5E-06 | 0.73739 | 0.38806 | 0.16836 | 1.94593 | 1.52458 | 2.06739 |
| Cd93          | 2.46328 | 0.00404 | 20.697  | 18.0489 | 2.52988 | 58.5308 | 45.0866 | 55.8779 |
| Slc25a5       | 2.46131 | 2.8E-05 | 22.3627 | 12.1557 | 5.44796 | 52.314  | 37.5219 | 67.8279 |
| Taldo1        | 2.46016 | 2.6E-05 | 8.03569 | 5.55102 | 2.16132 | 22.5336 | 14.0237 | 30.0901 |
| Eif4a1        | 2.45986 | 4.6E-09 | 45.0576 | 33.5102 | 11.6445 | 61.8008 | 50.0229 | 84.4113 |
| Fbln5         | 2.45847 | 0.02246 | 2.2094  | 1.3253  | 0.23255 | 6.42736 | 3.22571 | 5.13494 |
| Zdhhc13       | 2.45793 | 0.00014 | 1.28858 | 0.67315 | 0.21633 | 3.44439 | 2.41554 | 3.41543 |
| Il1r1         | 2.4552  | 3.3E-09 | 2.97138 | 2.22176 | 0.73742 | 7.31429 | 7.22449 | 10.3135 |
| Prr5          | 2.45313 | 0.00271 | 0.66705 | 0.36268 | 0.10879 | 1.55887 | 1.64055 | 1.71751 |
| Rps7          | 2.45114 | 2.2E-05 | 48.6627 | 31.3509 | 12.1523 | 134.347 | 94.7648 | 138.99  |
| Polr2d        | 2.44923 | 0.00348 | 1.81529 | 0.56565 | 0.98164 | 5.15193 | 3.35966 | 5.87047 |
| A430005L14Rik | 2.44896 | 0.00097 | 1.23588 | 0.64708 | 0.13437 | 3.4944  | 1.94014 | 3.61609 |
| Tpbp          | 2.44759 | 0.00432 | 0.33405 | 0.30271 | 0.10896 | 0.93968 | 0.75164 | 0.91875 |
| Rps17         | 2.4432  | 5.9E-07 | 26.8134 | 15.0987 | 8.67565 | 79.7954 | 51.4718 | 84.9902 |
| Rps20         | 2.44267 | 8.1E-07 | 11.0366 | 7.06248 | 3.4246  | 31.739  | 23.0917 | 32.4075 |

|               |         |         |         |         |         |         |         |         |
|---------------|---------|---------|---------|---------|---------|---------|---------|---------|
| Rbmx1l        | 2.44191 | 0.0069  | 3.50676 | 2.19024 | 1.66292 | 9.70817 | 7.50947 | 10.2542 |
| Sema7a        | 2.44119 | 4.5E-07 | 13.5428 | 12.7894 | 3.95207 | 39.5836 | 39.7868 | 45.6053 |
| Ncapg         | 2.43832 | 0.01663 | 0.11634 | 0.25146 | 0.22135 | 0.79885 | 0.88069 | 0.55068 |
| Adamts1       | 2.43527 | 0.00089 | 15.2631 | 7.15402 | 2.94997 | 35.9156 | 34.176  | 28.6219 |
| Hn1l          | 2.43379 | 0.00012 | 1.65049 | 2.05443 | 0.85323 | 6.47172 | 6.27384 | 7.3987  |
| C5ar2         | 2.43223 | 0.00789 | 0.35909 | 0.23863 | 0.08784 | 1.18108 | 0.7892  | 0.98763 |
| Slc19a2       | 2.43212 | 5.2E-05 | 0.78534 | 0.76487 | 0.38035 | 2.56657 | 2.37108 | 3.50943 |
| Pgm1          | 2.42907 | 2.2E-05 | 2.01013 | 1.1036  | 0.56363 | 5.38442 | 3.95279 | 6.24056 |
| Fkbp5         | 2.42886 | 0.00732 | 6.11501 | 4.20071 | 2.27781 | 10.6975 | 20.7691 | 21.0504 |
| Lclat1        | 2.42866 | 3E-05   | 3.35041 | 2.12529 | 0.86726 | 9.85472 | 8.1626  | 7.91537 |
| Zfas1         | 2.42816 | 2.1E-06 | 1.21617 | 0.92312 | 0.60519 | 3.26862 | 3.63237 | 4.34309 |
| Uqcrb         | 2.42691 | 0.01258 | 10.8437 | 4.40935 | 1.66644 | 22.8688 | 14.5132 | 32.7163 |
| Asf1b         | 2.42614 | 0.03162 | 0.15627 | 0.56171 | 0.0892  | 1.2545  | 1.2879  | 1.08819 |
| Nedd8         | 2.4261  | 0.00022 | 11.0391 | 6.13921 | 3.10743 | 30.327  | 18.5009 | 37.1667 |
| Sec13         | 2.42443 | 0.00013 | 7.1734  | 3.79775 | 1.62533 | 17.8826 | 14.0004 | 19.6493 |
| Plbd1         | 2.42391 | 0.01621 | 2.80985 | 2.8753  | 0.55442 | 11.2445 | 5.10808 | 9.2648  |
| Cd48          | 2.42366 | 0.00317 | 1.92047 | 1.81922 | 0.70157 | 7.8658  | 5.06493 | 6.16756 |
| Havcr2        | 2.42273 | 0.0006  | 0.80562 | 1.67507 | 0.30657 | 4.10829 | 3.61494 | 4.40008 |
| Grrp1         | 2.42269 | 0.00154 | 2.22076 | 2.54476 | 1.79919 | 10.6339 | 8.50193 | 10.3293 |
| Dse           | 2.42239 | 2.2E-05 | 2.34763 | 1.81495 | 0.67002 | 7.53422 | 6.61071 | 5.73989 |
| Galns         | 2.4205  | 0.00489 | 1.30975 | 1.10776 | 0.43282 | 3.44569 | 3.25729 | 4.26384 |
| Itgb1         | 2.41997 | 4E-05   | 44.8519 | 29.038  | 9.07042 | 118.423 | 95.8692 | 111.776 |
| Rpl23a        | 2.41985 | 0.0011  | 61.0355 | 29.3684 | 12.0645 | 162.426 | 96.8544 | 175.897 |
| Mthfd2        | 2.41964 | 0.0015  | 0.89059 | 0.288   | 0.23922 | 2.36468 | 1.6311  | 1.86697 |
| Slco2a1       | 2.41832 | 3.8E-07 | 14.5745 | 12.6104 | 3.61571 | 40.6403 | 33.2143 | 50.6015 |
| Cndp2         | 2.41748 | 3.6E-08 | 7.45701 | 5.90599 | 2.60802 | 22.8515 | 21.2203 | 22.9537 |
| Gm14305       | 2.41664 | 0.04789 | 0.47496 | 0.1545  | 0       | 1.59379 | 0.82973 | 1.28706 |
| Cryab         | 2.41624 | 0.00671 | 16.4889 | 5.74557 | 2.39705 | 36.9681 | 19.9066 | 39.1094 |
| Prkcb         | 2.41566 | 0.00362 | 0.73085 | 0.92722 | 0.37326 | 3.9387  | 2.42348 | 2.45806 |
| Snx7          | 2.41458 | 1.2E-05 | 1.66232 | 2.54593 | 1.12837 | 7.0774  | 7.33973 | 9.09136 |
| Rsl1          | 2.41404 | 0.01175 | 0.66508 | 0.56251 | 0       | 2.48492 | 1.4211  | 1.5438  |
| Timm10b       | 2.409   | 0.00638 | 1.73394 | 1.31557 | 0.75686 | 3.05899 | 2.33505 | 3.71847 |
| Dbn1          | 2.40846 | 0.00052 | 0.95101 | 1.33488 | 0.97018 | 4.32764 | 4.93623 | 5.61963 |
| Rpl14         | 2.40595 | 0.00011 | 28.9337 | 17.1723 | 6.18934 | 74.3786 | 47.5405 | 82.3073 |
| Sh3bgrl       | 2.40494 | 0.00064 | 14.8721 | 8.33888 | 2.37124 | 34.4658 | 27.8163 | 36.3027 |
| Natd1         | 2.40457 | 4.9E-05 | 1.07532 | 0.90949 | 0.39283 | 3.88304 | 2.77296 | 3.43575 |
| Cox6b1        | 2.40435 | 0.00037 | 23.3504 | 10.4748 | 4.71283 | 57.9974 | 35.4414 | 61.5119 |
| Lamtor1       | 2.40207 | 1.1E-05 | 4.94801 | 3.84562 | 1.29767 | 14.4224 | 12.5891 | 16.7626 |
| Psmb6         | 2.40162 | 6.9E-07 | 5.85497 | 4.53937 | 1.44821 | 17.0276 | 11.9028 | 20.506  |
| Ubl5          | 2.40101 | 0.00215 | 3.21314 | 1.53702 | 0.84187 | 7.56375 | 3.74313 | 8.13452 |
| Cnr1          | 2.40096 | 0.01156 | 0.14174 | 0.10789 | 0.01618 | 0.4208  | 0.22844 | 0.51094 |
| Tagln2        | 2.40047 | 3.1E-07 | 33.0781 | 27.0863 | 9.71598 | 103.078 | 71.477  | 112.854 |
| Lgalsl        | 2.3998  | 0.00059 | 2.84112 | 1.52063 | 0.63348 | 6.97968 | 5.9352  | 7.25559 |
| Malt1         | 2.39938 | 9.4E-06 | 1.65643 | 2.23852 | 0.63718 | 6.2725  | 5.8564  | 6.9917  |
| Cnn2          | 2.39903 | 7.7E-06 | 18.119  | 12.5299 | 4.66255 | 55.0474 | 34.1095 | 54.6008 |
| Rpl7a         | 2.39881 | 2.1E-05 | 19.0778 | 11.1475 | 6.67431 | 56.9556 | 38.6978 | 64.0731 |
| Plppr3        | 2.39628 | 0.00901 | 0.8595  | 0.65603 | 0.47864 | 1.30824 | 1.45898 | 1.30526 |
| Arhgdia       | 2.39495 | 5.8E-08 | 30.338  | 23.7777 | 10.2978 | 93.818  | 71.5658 | 102.368 |
| Acat2         | 2.39113 | 0.03522 | 1.83106 | 0.94135 | 0.16395 | 3.95906 | 2.55133 | 5.55922 |
| Mfap5         | 2.39111 | 0.00357 | 2.0105  | 1.74349 | 0.29053 | 5.7514  | 5.92879 | 3.98226 |
| Cd180         | 2.39093 | 0.01672 | 0.36462 | 0.68531 | 0.34688 | 2.55283 | 1.46915 | 1.4438  |
| Ccnf          | 2.39069 | 0.00479 | 0.17684 | 0.6232  | 0.06729 | 1.5893  | 0.95004 | 1.35218 |
| Tspan4        | 2.3906  | 2.9E-05 | 7.21307 | 3.75973 | 1.57987 | 21.4194 | 11.4594 | 20.9576 |
| 1700017B05Rik | 2.39053 | 7.5E-09 | 2.63457 | 1.87411 | 0.91623 | 6.82895 | 8.11651 | 7.40428 |
| Rpl27a        | 2.38869 | 1.7E-05 | 18.1753 | 9.74698 | 4.47307 | 51.2103 | 34.0597 | 56.4049 |
| Ogfrl1        | 2.38713 | 8.6E-05 | 1.08132 | 0.66687 | 0.12859 | 2.3954  | 2.23622 | 2.74991 |



|            |         |         |         |         |         |         |         |         |
|------------|---------|---------|---------|---------|---------|---------|---------|---------|
| Nek6       | 2.38662 | 8.9E-06 | 1.50041 | 1.03829 | 0.51581 | 3.71894 | 3.14144 | 5.14737 |
| Tlr1       | 2.38643 | 0.02171 | 0.27298 | 0.73881 | 0.09349 | 2.06739 | 1.43986 | 1.25237 |
| Mmgt1      | 2.38578 | 0.00262 | 1.70422 | 1.53263 | 0.34478 | 4.65304 | 3.7297  | 6.11498 |
| Lhx6       | 2.38544 | 0.00347 | 0.32315 | 0.22508 | 0.1085  | 0.97896 | 0.94695 | 0.8098  |
| Nsa2       | 2.384   | 0.00013 | 6.22293 | 4.02652 | 1.04815 | 15.6789 | 10.8118 | 18.0247 |
| Uppt       | 2.38396 | 0.00042 | 1.11001 | 0.57    | 0.18103 | 3.17051 | 2.14913 | 2.3384  |
| Mcam       | 2.38282 | 1E-10   | 17.0133 | 13.029  | 4.32649 | 50.7475 | 38.3503 | 49.0074 |
| Al837181   | 2.38239 | 0.00083 | 2.50895 | 2.87989 | 0.81835 | 8.21592 | 5.77669 | 12.4796 |
| Rnf149     | 2.38214 | 3.4E-08 | 2.96091 | 3.13036 | 1.28594 | 9.4573  | 10.2327 | 12.4188 |
| Cdkn2aipnl | 2.38122 | 0.01293 | 3.73187 | 2.09108 | 0.79881 | 7.12239 | 5.60459 | 7.75806 |
| Ctla2b     | 2.38122 | 0.00222 | 2.62785 | 1.01027 | 0.63636 | 4.96949 | 5.13372 | 6.98055 |
| Scn3b      | 2.38045 | 2.9E-05 | 3.14438 | 2.80092 | 1.12654 | 12.9407 | 8.29524 | 8.01592 |
| Mrpl16     | 2.37994 | 0.00315 | 2.52359 | 0.82622 | 0.65054 | 4.88293 | 5.12883 | 6.26909 |
| Atp6v1f    | 2.37491 | 0.00015 | 5.24139 | 3.12495 | 2.05993 | 16.2948 | 9.69393 | 18.1617 |
| Ndufb4     | 2.37454 | 0.00488 | 5.62077 | 1.4526  | 1.42593 | 10.5004 | 7.03448 | 13.8146 |
| Snhg18     | 2.37183 | 0.01002 | 1.22931 | 1.09171 | 0.21051 | 3.6496  | 2.88187 | 3.97812 |
| Siglece    | 2.37156 | 0.00588 | 0.59278 | 0.66848 | 0.33836 | 1.70599 | 1.77326 | 3.48042 |
| Bud31      | 2.37123 | 0.00012 | 2.78157 | 2.20856 | 1.03688 | 8.90803 | 6.32121 | 11.115  |
| Selenon    | 2.36987 | 2.2E-07 | 3.0286  | 2.09192 | 0.89318 | 9.11372 | 6.50829 | 9.15977 |
| Fhl3       | 2.369   | 0.0092  | 0.70552 | 0.78032 | 0.5576  | 3.68275 | 2.18671 | 2.80108 |
| Mrpl17     | 2.36838 | 0.00877 | 0.99685 | 0.80248 | 0.2468  | 1.97201 | 1.53975 | 1.83997 |
| Msn        | 2.36634 | 2.9E-07 | 32.7412 | 29.9508 | 8.63573 | 101.085 | 77.9122 | 103.899 |
| Ninj1      | 2.36581 | 2.2E-07 | 3.19972 | 2.16502 | 0.99622 | 8.91782 | 7.79945 | 9.67533 |
| Kctd12     | 2.36511 | 0.0007  | 6.71046 | 6.37706 | 1.96251 | 16.9574 | 11.3345 | 13.3425 |
| Slit2      | 2.36505 | 4.8E-08 | 1.67645 | 1.30306 | 0.54255 | 6.22411 | 3.73802 | 4.46261 |
| Cd38       | 2.36335 | 0.00025 | 2.68147 | 2.00807 | 0.44642 | 6.194   | 6.36393 | 7.64308 |
| Crtap      | 2.36261 | 2.3E-05 | 3.86587 | 2.70294 | 1.41225 | 12.8356 | 9.78022 | 12.7108 |
| Gatm       | 2.36147 | 0.02247 | 0.39566 | 1.00394 | 0.41695 | 2.85827 | 2.74253 | 2.34386 |
| Rpl13      | 2.36055 | 5E-06   | 30.0235 | 20.2135 | 9.24179 | 70.3317 | 48.5025 | 75.0308 |
| Grwd1      | 2.35983 | 0.00021 | 0.97687 | 0.56333 | 0.35484 | 2.74412 | 2.11442 | 3.01935 |
| Qpct       | 2.35946 | 0.01126 | 0.80704 | 0.44167 | 0.27098 | 2.07093 | 1.46069 | 2.83914 |
| Ndufc1     | 2.35743 | 0.01399 | 2.07724 | 0.7751  | 0.48823 | 4.59006 | 2.64073 | 6.45681 |
| Rraga      | 2.35731 | 3.7E-05 | 5.19348 | 2.9602  | 1.28889 | 14.4335 | 8.80874 | 15.2155 |
| Commd3     | 2.35685 | 8.2E-05 | 2.39124 | 2.05563 | 0.76078 | 7.86158 | 5.31286 | 8.47847 |
| Gimap9     | 2.35348 | 0.00137 | 0.94564 | 0.8939  | 0.38102 | 3.87581 | 2.28206 | 3.19003 |
| Wdr75      | 2.35135 | 0.00094 | 1.52851 | 0.48874 | 0.3192  | 3.08322 | 2.58094 | 3.54292 |
| B3gnt3     | 2.3504  | 6.5E-07 | 2.6609  | 2.04825 | 0.71676 | 7.46318 | 6.52706 | 8.10749 |
| Rpsa       | 2.34913 | 1.3E-07 | 32.4148 | 22.0545 | 10.3614 | 90.0276 | 64.1903 | 93.3119 |
| Ptpn6      | 2.34849 | 0.002   | 1.92324 | 2.42618 | 1.48853 | 10.4873 | 6.23282 | 8.70601 |
| Ugcg       | 2.34798 | 8.6E-06 | 3.41727 | 3.00885 | 0.76023 | 9.83206 | 8.02395 | 10.5668 |
| Mcm3       | 2.34761 | 0.00013 | 1.18974 | 1.23687 | 0.93377 | 5.21111 | 4.39431 | 4.93444 |
| Pls3       | 2.34642 | 0.00013 | 12.3062 | 7.30957 | 3.05089 | 30.7255 | 24.7254 | 33.5653 |
| Zfp277     | 2.34452 | 0.00132 | 0.70718 | 0.72404 | 0.38241 | 2.70611 | 2.07229 | 2.86631 |
| Rplp0      | 2.34341 | 3.3E-06 | 70.6917 | 42.8866 | 20.6783 | 188.369 | 147.137 | 207.843 |
| Clns1a     | 2.34335 | 0.00463 | 3.67762 | 1.7337  | 0.68826 | 8.65713 | 6.62508 | 8.79178 |
| Tma7       | 2.34301 | 0.0007  | 6.18327 | 4.03596 | 1.61126 | 17.2657 | 13.5402 | 20.7583 |
| Id2        | 2.34164 | 0.00066 | 6.18507 | 4.44045 | 3.36624 | 21.1773 | 13.5407 | 25.5715 |
| Lyz2       | 2.34035 | 0.01603 | 342.408 | 305.468 | 45.382  | 882.859 | 572.674 | 1034.78 |
| Fstl3      | 2.33988 | 7.3E-05 | 2.35348 | 1.16904 | 0.59706 | 6.85807 | 7.88181 | 7.77364 |
| Akap2      | 2.33779 | 0.00043 | 26.317  | 20.8863 | 4.63684 | 50.5265 | 40.4529 | 55.1844 |
| Psmb8      | 2.3363  | 0.00109 | 2.437   | 4.57412 | 1.67688 | 11.0639 | 8.1196  | 10.1741 |
| Nfil3      | 2.33566 | 0.0036  | 1.44265 | 2.09716 | 0.87493 | 5.59954 | 6.01097 | 7.09139 |
| Igfbp2     | 2.33463 | 0.00877 | 10.83   | 9.49439 | 1.75009 | 42.0068 | 16.52   | 26.2934 |
| Hvcn1      | 2.33434 | 0.00913 | 1.51247 | 1.7779  | 0.96575 | 8.68228 | 5.18329 | 4.93539 |
| Cenpl      | 2.33411 | 0.00308 | 0.17592 | 0.26782 | 0.06025 | 0.73545 | 0.70883 | 0.69179 |
| Entpd1     | 2.33404 | 2.7E-06 | 6.26923 | 5.51007 | 1.62574 | 17.1375 | 14.1501 | 21.7782 |

|               |         |         |         |         |         |         |         |         |
|---------------|---------|---------|---------|---------|---------|---------|---------|---------|
| Kynu          | 2.33388 | 0.0141  | 0.10398 | 0.20101 | 0.06783 | 0.71099 | 0.43528 | 0.43809 |
| Emcn          | 2.33328 | 0.00037 | 0.92874 | 0.58557 | 0.13494 | 2.58846 | 1.91746 | 1.97828 |
| Serinc2       | 2.33094 | 0.00045 | 1.26037 | 1.03269 | 0.17986 | 4.0091  | 2.22179 | 3.9044  |
| Spc25         | 2.32974 | 0.00157 | 0.34381 | 0.46041 | 0.22895 | 1.40606 | 1.42726 | 1.50221 |
| Mb21d1        | 2.32928 | 0.00314 | 0.39847 | 0.22468 | 0.07582 | 1.04617 | 1.00548 | 0.76171 |
| Ncf2          | 2.32805 | 1.8E-05 | 1.36259 | 1.69151 | 0.97849 | 6.47141 | 4.42761 | 6.62585 |
| Nkain4        | 2.32768 | 0.01452 | 0.73719 | 0.8729  | 0.08416 | 2.14392 | 1.51217 | 3.62368 |
| 2410015M20Rik | 2.32759 | 0.02079 | 5.44396 | 2.45568 | 1.93351 | 13.9266 | 6.46976 | 20.7142 |
| Fbln2         | 2.32758 | 0.0195  | 2.58097 | 1.11572 | 0.34375 | 4.37854 | 6.88041 | 3.06599 |
| Fam198b       | 2.32128 | 0.00375 | 2.2051  | 1.13429 | 0.23554 | 4.75815 | 3.47651 | 5.43019 |
| Tmsb10        | 2.32043 | 3.9E-05 | 30.2073 | 26.7596 | 12.6662 | 117.922 | 91.3503 | 105.91  |
| Col6a2        | 2.31969 | 1.1E-08 | 8.00822 | 8.81446 | 4.68383 | 29.85   | 28.7793 | 32.4714 |
| Tmem123       | 2.3182  | 0.00029 | 11.2813 | 7.37979 | 2.58247 | 31.0252 | 23.9114 | 26.6438 |
| Pf4           | 2.31776 | 0.00475 | 2.02691 | 1.50003 | 0.14462 | 4.91228 | 5.19715 | 4.77411 |
| Nipsnap3b     | 2.3137  | 0.00188 | 1.57012 | 1.28219 | 0.43266 | 4.92056 | 3.21279 | 5.32275 |
| Laptm5        | 2.31114 | 1.3E-06 | 8.65633 | 11.6245 | 4.54192 | 39.9125 | 26.0199 | 38.0071 |
| Tirap         | 2.31074 | 0.00012 | 1.09331 | 0.5799  | 0.52887 | 2.76194 | 2.44358 | 3.7498  |
| Asnsd1        | 2.30962 | 0.01148 | 2.35593 | 1.3795  | 0.67977 | 4.47048 | 3.67947 | 4.00869 |
| Pnp           | 2.30948 | 2E-05   | 5.24044 | 4.28203 | 1.82517 | 13.0771 | 11.3872 | 12.8798 |
| 2410006H16Rik | 2.30933 | 0.00117 | 4.74481 | 4.18029 | 2.03126 | 17.9675 | 12.0212 | 15.063  |
| Lpxn          | 2.30859 | 0.0176  | 0.76342 | 1.10689 | 0.62252 | 4.0968  | 3.23581 | 3.17185 |
| Ranbp1        | 2.30705 | 2.8E-05 | 4.49561 | 4.12689 | 2.37834 | 15.9775 | 11.0451 | 19.3136 |
| Msln          | 2.30626 | 0.0146  | 2.8516  | 3.14269 | 1.52905 | 8.90045 | 10.6985 | 11.5394 |
| Mrpl41        | 2.30604 | 0.01033 | 2.6743  | 1.47892 | 0.46969 | 6.23197 | 4.59652 | 5.98294 |
| Sh2d1b1       | 2.30591 | 0.03922 | 0.75397 | 0.54659 | 0.08197 | 2.47985 | 1.31512 | 1.64718 |
| Avpi1         | 2.3053  | 0.00657 | 3.84268 | 1.43753 | 0.92798 | 8.64125 | 4.70992 | 11.4423 |
| Nt5dc2        | 2.30335 | 0.00043 | 5.64774 | 3.0747  | 0.66698 | 11.2489 | 8.6079  | 16.2209 |
| Tmem119       | 2.30293 | 0.00014 | 3.51147 | 2.66961 | 0.76571 | 9.46634 | 7.02373 | 10.9253 |
| Mrpl32        | 2.30269 | 0.042   | 2.49751 | 1.30765 | 1.49347 | 7.49394 | 5.14048 | 9.74335 |
| Ggh           | 2.30254 | 0.02394 | 1.53391 | 0.82559 | 0.26532 | 3.21056 | 2.92852 | 4.11273 |
| Lrp1          | 2.30084 | 3.8E-08 | 22.5908 | 18.418  | 7.03304 | 62.371  | 54.82   | 71.0826 |
| Sp3           | 2.29883 | 5.8E-05 | 5.23992 | 3.03808 | 1.31053 | 12.0148 | 8.73549 | 13.6825 |
| Slirp         | 2.29746 | 0.00725 | 1.20646 | 0.87107 | 0.53748 | 3.08434 | 1.9617  | 3.9777  |
| Dctpp1        | 2.29686 | 0.00548 | 2.16184 | 1.14278 | 0.15425 | 4.42064 | 3.95937 | 5.64538 |
| Sftpc         | 2.29583 | 0.04433 | 771.598 | 856.303 | 152.646 | 2119.16 | 1216.01 | 3481.5  |
| Psmb4         | 2.29253 | 1.4E-05 | 10.8232 | 6.64231 | 3.39033 | 27.6299 | 19.7259 | 36.225  |
| Fads2         | 2.29163 | 1.4E-06 | 4.11867 | 3.79087 | 1.65949 | 12.9542 | 9.76189 | 16.5735 |
| Eif5a         | 2.29148 | 1.2E-08 | 16.254  | 12.2524 | 5.92202 | 46.6326 | 39.1852 | 54.8389 |
| Ctsh          | 2.2914  | 6.3E-09 | 14.1519 | 16.0814 | 6.6492  | 43.7615 | 44.1328 | 63.0574 |
| Gpx3          | 2.29118 | 1.4E-05 | 109.222 | 74.9934 | 24.1556 | 234.21  | 237.647 | 311.079 |
| Dnttip2       | 2.29065 | 0.00049 | 3.47795 | 1.93771 | 1.44953 | 6.4722  | 5.25762 | 8.29925 |
| Lpcat3        | 2.29059 | 1E-07   | 2.37567 | 1.89111 | 0.9253  | 7.16302 | 5.85594 | 8.22019 |
| Adamts2       | 2.28873 | 4.4E-06 | 2.99371 | 2.7058  | 1.0722  | 8.103   | 8.93038 | 7.88685 |
| Aimp2         | 2.28854 | 0.02273 | 1.10444 | 0.46706 | 0.18913 | 2.6432  | 2.26551 | 2.98592 |
| Ifi209        | 2.28772 | 0.00984 | 0.95277 | 1.21965 | 0.47035 | 5.05501 | 4.24457 | 2.17293 |
| Eif3l         | 2.28671 | 0.0006  | 7.86478 | 3.71363 | 2.97446 | 21.3408 | 13.6089 | 24.271  |
| Lamc1         | 2.28513 | 5E-06   | 12.4993 | 8.5358  | 2.92444 | 31.6639 | 25.1168 | 34.1669 |
| Fam105a       | 2.28404 | 0.00044 | 1.38781 | 1.47406 | 0.58952 | 5.51443 | 4.13775 | 4.33638 |
| Yif1a         | 2.28224 | 0.00626 | 1.95767 | 1.65576 | 1.0476  | 6.37539 | 4.70589 | 8.26977 |
| Praf2         | 2.27867 | 0.02946 | 1.56891 | 1.15387 | 0.70085 | 5.0835  | 3.99781 | 4.80604 |
| Msrp1         | 2.27831 | 1.4E-06 | 7.11533 | 5.71098 | 2.07217 | 19.0038 | 16.0103 | 24.3283 |
| Mea1          | 2.27723 | 0.00094 | 5.21929 | 4.78225 | 3.10332 | 12.4515 | 9.71836 | 16.2129 |
| Podxl         | 2.27606 | 0.00014 | 19.9718 | 16.4695 | 3.72398 | 63.4674 | 38.5044 | 46.7408 |
| Cmah          | 2.27594 | 2E-05   | 1.08081 | 1.20076 | 0.33461 | 4.20654 | 3.34164 | 3.20417 |
| Mboat2        | 2.27446 | 0.03463 | 0.42376 | 0.35841 | 0       | 1.28376 | 0.81194 | 1.01481 |
| Cxcl12        | 2.27378 | 0.00057 | 8.49028 | 5.87703 | 1.28809 | 17.8013 | 16.2127 | 22.899  |

|          |         |         |         |         |         |         |         |         |
|----------|---------|---------|---------|---------|---------|---------|---------|---------|
| Nlrc4    | 2.27373 | 0.03837 | 0.21418 | 0.18115 | 0.05434 | 0.74978 | 0.52303 | 0.54591 |
| Vamp3    | 2.27324 | 0.00804 | 9.04207 | 5.93627 | 2.09337 | 14.6922 | 11.627  | 14.1939 |
| Rap1b    | 2.27304 | 0.00019 | 21.9319 | 15.3053 | 4.48202 | 52.715  | 44.4326 | 58.7466 |
| Mrps34   | 2.27271 | 0.04635 | 3.49596 | 2.17083 | 0.95986 | 4.2631  | 2.98257 | 5.76444 |
| Tlr4     | 2.27161 | 0.00029 | 1.2494  | 0.84816 | 0.58179 | 3.48613 | 3.09516 | 4.3098  |
| Cyr61    | 2.27122 | 0.0083  | 21.3528 | 15.3432 | 3.30529 | 60.7395 | 41.9244 | 42.214  |
| Gnpat1   | 2.27059 | 0.00688 | 1.42444 | 1.08723 | 0.23797 | 3.68371 | 3.48692 | 4.26943 |
| Lrrc59   | 2.27019 | 3.4E-07 | 7.16315 | 5.65625 | 3.6646  | 22.4745 | 20.5552 | 24.6183 |
| Tmem106a | 2.26964 | 0.00032 | 1.10606 | 1.40323 | 0.9304  | 5.74914 | 4.71251 | 3.81537 |
| Marcks1  | 2.26899 | 1.6E-05 | 2.33323 | 2.4066  | 1.68913 | 9.68878 | 8.3798  | 9.04474 |
| Vmp1     | 2.2682  | 4.9E-10 | 9.22363 | 7.74118 | 3.83391 | 30.1202 | 23.9273 | 29.4317 |
| Siae     | 2.26808 | 0.00702 | 0.59356 | 0.38249 | 0.06453 | 1.44707 | 1.0871  | 1.38937 |
| Plxdc2   | 2.26773 | 0.00106 | 6.95517 | 4.10334 | 1.14073 | 16.0754 | 9.41044 | 19.7548 |
| Actg1    | 2.26636 | 3.4E-06 | 147.006 | 107.798 | 53.4303 | 376.657 | 265.841 | 346.415 |
| Arf4     | 2.26541 | 4.2E-05 | 10.0656 | 6.72829 | 3.15076 | 26.2436 | 22.0983 | 29.3942 |
| Lgals3bp | 2.2648  | 0.00032 | 9.59253 | 10.4196 | 7.21513 | 45.271  | 33.5859 | 38.4264 |
| Lamb1    | 2.26471 | 1.1E-05 | 5.8669  | 4.06629 | 1.3143  | 14.1126 | 12.5163 | 15.4759 |
| Psm4     | 2.26431 | 0.00029 | 4.933   | 2.96621 | 1.40788 | 10.8345 | 9.93818 | 13.7028 |
| Anln     | 2.26339 | 0.00215 | 0.68187 | 0.61891 | 0.56958 | 2.68034 | 3.11905 | 1.90751 |
| Dpy19l1  | 2.26261 | 7.2E-05 | 1.43839 | 1.38688 | 0.3941  | 4.14831 | 3.54061 | 4.00659 |
| Fth1     | 2.26255 | 1.4E-05 | 410.281 | 276.269 | 107.522 | 927.677 | 789.902 | 1309.51 |
| Cpne1    | 2.26136 | 0.00045 | 2.43189 | 3.44522 | 1.41126 | 8.61961 | 7.2748  | 10.6922 |
| Blm      | 2.25951 | 0.0238  | 0.12132 | 0.25082 | 0.1385  | 0.80037 | 0.66163 | 0.66259 |
| Zfp143   | 2.25866 | 0.00252 | 0.94379 | 0.75389 | 0.29929 | 3.00208 | 1.74774 | 2.77065 |
| C1qbp    | 2.25859 | 8.3E-06 | 4.27014 | 2.38734 | 1.7351  | 10.7435 | 9.22577 | 13.4597 |
| F10      | 2.25414 | 0.00701 | 0.40134 | 0.79204 | 0.64907 | 2.45189 | 2.42564 | 2.73998 |
| Plk1     | 2.25335 | 0.03787 | 0.29075 | 0.56209 | 0.61643 | 2.31526 | 1.43016 | 1.73546 |
| Tor2a    | 2.25271 | 0.00266 | 1.58718 | 1.11445 | 0.88887 | 3.41111 | 2.89592 | 3.55744 |
| Tcn2     | 2.25183 | 0.00615 | 10.0228 | 6.98742 | 2.44162 | 23.9349 | 17.5117 | 32.7419 |
| Lims1    | 2.25168 | 0.00013 | 7.2831  | 4.48569 | 1.42838 | 16.3949 | 14.6112 | 17.6248 |
| Mettl9   | 2.25072 | 2.5E-05 | 4.8834  | 3.74786 | 2.73584 | 9.5064  | 7.98322 | 9.52031 |
| Icos     | 2.24838 | 0.02478 | 0.23966 | 0.38288 | 0.0304  | 1.24232 | 0.54623 | 0.89446 |
| Cltc     | 2.24773 | 3.6E-05 | 16.9585 | 12.4526 | 3.96278 | 43.9906 | 34.4841 | 45.8271 |
| Mcm5     | 2.24628 | 0.00204 | 0.59474 | 0.96734 | 0.62673 | 3.36779 | 3.04989 | 2.69856 |
| Kif4     | 2.24598 | 0.00272 | 0.24847 | 0.30822 | 0.1891  | 0.94341 | 1.09217 | 0.74639 |
| St3gal1  | 2.24589 | 2.2E-06 | 7.89699 | 7.3455  | 2.32179 | 23.8788 | 18.0404 | 25.6085 |
| Rras2    | 2.24584 | 9.9E-06 | 3.98349 | 2.73881 | 1.05621 | 11.0711 | 8.90546 | 9.76945 |
| Lactb    | 2.24522 | 0.00013 | 1.65987 | 0.91063 | 0.40971 | 4.56635 | 3.02359 | 4.07957 |
| Med6     | 2.24439 | 0.00062 | 1.45181 | 0.90759 | 0.64854 | 3.8627  | 3.14451 | 4.96446 |
| Lamtor2  | 2.24415 | 0.00448 | 4.79935 | 2.34673 | 0.77048 | 11.0407 | 6.31776 | 12.7172 |
| Apbb1ip  | 2.24363 | 5E-05   | 1.02253 | 1.12533 | 0.49224 | 3.82169 | 3.26715 | 3.47197 |
| Ptk7     | 2.24317 | 5.2E-08 | 6.78324 | 6.28181 | 2.74463 | 20.016  | 13.5714 | 22.1233 |
| Tceb3    | 2.24208 | 0.00019 | 4.90833 | 3.47863 | 1.59464 | 9.13319 | 8.0728  | 11.3483 |
| Ptger4   | 2.24153 | 8.2E-05 | 1.00295 | 0.6275  | 0.28232 | 2.59718 | 1.5903  | 2.02605 |
| Tuba1b   | 2.24139 | 1.6E-06 | 35.6582 | 23.6493 | 13.0687 | 103.862 | 82.8298 | 118.09  |
| Rpl18a   | 2.24125 | 1.6E-05 | 44.2244 | 33.184  | 15.0501 | 108.388 | 61.7188 | 115.707 |
| Il7r     | 2.24052 | 0.00207 | 1.73678 | 1.13181 | 0.84509 | 6.76223 | 4.06736 | 4.03535 |
| Gpr65    | 2.23976 | 0.00974 | 0.84696 | 0.98026 | 0.15267 | 2.78185 | 2.54721 | 2.44682 |
| Loxl4    | 2.2397  | 0.00453 | 0.56368 | 0.29338 | 0.17325 | 1.47118 | 1.35002 | 1.15449 |
| Triap1   | 2.23956 | 0.00714 | 1.25925 | 1.49107 | 0.86254 | 5.28984 | 4.05908 | 5.2958  |
| Vim      | 2.23916 | 1.1E-08 | 72.9923 | 61.0453 | 26.8887 | 221.995 | 181.435 | 223.372 |
| Rpl10a   | 2.23875 | 4.9E-09 | 19.9862 | 12.5629 | 6.74724 | 57.2717 | 37.5729 | 55.0147 |
| Tmem263  | 2.23853 | 0.0004  | 1.72936 | 1.3087  | 0.38965 | 4.02572 | 3.96746 | 4.77235 |
| Hist2h4  | 2.23758 | 0.00664 | 2.35348 | 1.84835 | 1.02352 | 8.79326 | 3.81775 | 8.58467 |
| Maoa     | 2.23704 | 0.02158 | 1.75354 | 1.18649 | 0.27525 | 4.43569 | 2.82619 | 4.72282 |
| Rnf13    | 2.23438 | 0.00294 | 2.60927 | 1.28642 | 0.50893 | 5.37033 | 4.51468 | 6.34854 |



|               |         |         |         |         |         |         |         |         |
|---------------|---------|---------|---------|---------|---------|---------|---------|---------|
| Mdga1         | 2.23384 | 0.04767 | 0.09722 | 0.10689 | 0.06659 | 0.34164 | 0.4487  | 0.27877 |
| Shmt2         | 2.23344 | 0.00042 | 1.50578 | 1.13951 | 1.08569 | 4.87375 | 4.4125  | 5.81101 |
| Psma5         | 2.23343 | 0.00076 | 6.01542 | 3.97662 | 1.97334 | 13.9502 | 10.4853 | 16.5972 |
| Eif1a         | 2.23213 | 3E-06   | 5.80576 | 3.8371  | 1.73846 | 13.4361 | 12.7133 | 17.96   |
| 2010107E04Rik | 2.2321  | 0.00122 | 15.0144 | 6.9844  | 3.14243 | 33.5071 | 21.6322 | 41.4122 |
| Col1a1        | 2.23186 | 0.01267 | 33.9437 | 65.2926 | 42.4839 | 202.826 | 270.844 | 140.149 |
| Gas7          | 2.23181 | 0.00011 | 2.35149 | 2.98327 | 1.25949 | 9.52419 | 11.0972 | 10.5032 |
| Eef1e1        | 2.23173 | 0.00178 | 1.77011 | 1.04799 | 0.50519 | 3.8073  | 3.95515 | 5.36564 |
| Mrps14        | 2.23152 | 0.00612 | 1.06532 | 0.52165 | 0.35205 | 3.02348 | 1.68413 | 2.89394 |
| Reln          | 2.23137 | 0.00578 | 0.53907 | 0.25287 | 0.07757 | 0.8179  | 0.98231 | 1.25439 |
| Map1lc3b      | 2.2306  | 0.00777 | 6.08755 | 4.04911 | 2.08071 | 8.81227 | 6.56938 | 10.9401 |
| Sash3         | 2.23052 | 0.00169 | 1.19418 | 1.24088 | 0.66216 | 4.94069 | 3.34941 | 4.19288 |
| Sulf1         | 2.22977 | 4.5E-05 | 1.63363 | 1.04653 | 0.37853 | 4.12574 | 3.63775 | 3.61755 |
| Atp6v0d1      | 2.22877 | 2.1E-05 | 7.74306 | 4.91171 | 2.61696 | 20.2162 | 15.1516 | 24.2891 |
| Pde4b         | 2.22841 | 0.02062 | 3.21757 | 2.31902 | 0.35547 | 9.56918 | 3.53576 | 7.96475 |
| Adam17        | 2.22803 | 5.3E-05 | 2.17045 | 2.21367 | 0.77249 | 7.60401 | 5.59326 | 6.85112 |
| Lrrc40        | 2.2276  | 0.00027 | 0.74663 | 0.38861 | 0.17484 | 1.32231 | 1.3464  | 2.05462 |
| Wdr1          | 2.22687 | 5.7E-07 | 8.49572 | 6.82189 | 3.10203 | 26.4664 | 19.919  | 25.2342 |
| Rab11a        | 2.22683 | 0.00015 | 6.65494 | 3.82128 | 1.28945 | 16.5539 | 11.4728 | 15.456  |
| Aqp5          | 2.2266  | 0.00047 | 16.6019 | 10.5196 | 2.81477 | 37.6457 | 24.5657 | 47.8061 |
| Ifit2         | 2.22609 | 0.00142 | 1.72116 | 1.41638 | 0.5045  | 4.49539 | 5.65705 | 3.50612 |
| Eif3e         | 2.22597 | 0.00022 | 10.7874 | 7.26898 | 2.02994 | 26.3951 | 20.7557 | 26.1731 |
| Ppib          | 2.22527 | 7.5E-05 | 6.60505 | 5.46956 | 2.39777 | 21.6838 | 15.1846 | 23.0034 |
| Ripk3         | 2.22397 | 0.00186 | 0.93012 | 0.78668 | 0.79637 | 3.07131 | 3.40699 | 3.46712 |
| Abcg1         | 2.22335 | 0.00026 | 4.65    | 4.57887 | 1.2053  | 16.2916 | 9.49557 | 13.8027 |
| Phex          | 2.22177 | 0.043   | 0.2323  | 0.36839 | 0.09945 | 1.07319 | 0.64882 | 1.1062  |
| Churc1        | 2.22097 | 0.00331 | 0.9145  | 0.67848 | 0.32968 | 1.46782 | 1.2929  | 1.40641 |
| Magoh         | 2.22082 | 0.0009  | 5.10067 | 2.6085  | 1.62501 | 12.0023 | 8.95074 | 15.4517 |
| Aspm          | 2.2207  | 0.01119 | 0.1655  | 0.24662 | 0.21592 | 0.95973 | 0.98147 | 0.67146 |
| Capza2        | 2.22019 | 1.1E-05 | 5.34999 | 4.11834 | 1.22152 | 12.731  | 12.6101 | 13.9748 |
| Carhsp1       | 2.22003 | 0.00026 | 11.5735 | 9.08366 | 1.82997 | 28.9228 | 22.1948 | 30.5987 |
| Ndufb6        | 2.21985 | 0.0005  | 5.95981 | 3.04787 | 0.94936 | 13.9399 | 8.32609 | 17.7137 |
| Kif15         | 2.21858 | 0.04679 | 0.05691 | 0.30484 | 0.08662 | 0.61489 | 0.70179 | 0.52839 |
| Kdelr2        | 2.21592 | 1.8E-05 | 10.9865 | 7.22255 | 3.19257 | 27.8363 | 22.6093 | 30.9707 |
| Aif1l         | 2.21584 | 0.01098 | 0.29449 | 0.1916  | 0.07758 | 0.75488 | 0.63063 | 0.83514 |
| Ndc1          | 2.21543 | 0.00484 | 0.63068 | 0.54911 | 0.16941 | 1.82069 | 1.56276 | 1.82361 |
| Kntc1         | 2.21531 | 0.01726 | 0.14874 | 0.16451 | 0.1698  | 0.67242 | 0.70409 | 0.54367 |
| Clstn2        | 2.21453 | 0.00159 | 1.15556 | 0.5294  | 0.21987 | 2.62551 | 1.5873  | 2.97159 |
| Abhd12        | 2.21424 | 1E-07   | 3.52667 | 3.17435 | 1.29277 | 11.9972 | 7.56123 | 11.9016 |
| Rpl27         | 2.21377 | 0.00901 | 1.48758 | 1.71111 | 0.27172 | 4.90307 | 2.96424 | 5.50858 |
| Dazap2        | 2.21211 | 0.00327 | 19.9582 | 11.042  | 4.5683  | 45.8539 | 32.0642 | 53.7654 |
| Itgax         | 2.21138 | 0.0019  | 2.45316 | 3.98885 | 1.71506 | 14.8633 | 7.14689 | 11.3108 |
| B4galt1       | 2.21133 | 7.5E-09 | 9.88016 | 10.6189 | 4.82693 | 31.2904 | 30.2959 | 38.74   |
| G6pdx         | 2.21039 | 1.3E-06 | 3.79585 | 2.78407 | 1.01563 | 10.0259 | 8.08174 | 12.2933 |
| Trmt10a       | 2.21031 | 0.02036 | 0.19468 | 0.0678  | 0.05229 | 0.39548 | 0.34396 | 0.39403 |
| Gars          | 2.21013 | 2.2E-07 | 5.769   | 3.98767 | 1.63812 | 13.8039 | 13.8804 | 15.3305 |
| Tyms          | 2.20965 | 0.00049 | 0.39001 | 0.32986 | 0.137   | 1.03609 | 1.25277 | 1.05687 |
| Jkamp         | 2.20924 | 0.00316 | 1.69646 | 0.8609  | 0.2324  | 3.90586 | 2.38621 | 4.16952 |
| Tgm2          | 2.20891 | 4.3E-06 | 26.6005 | 22.3641 | 8.64403 | 74.2188 | 60.0739 | 77.8006 |
| Oaf           | 2.20825 | 0.00237 | 0.86856 | 0.61707 | 0.39662 | 2.44177 | 2.46884 | 2.39088 |
| Psma1         | 2.20821 | 0.00039 | 4.77752 | 3.08566 | 1.58663 | 12.0521 | 10.6272 | 13.5567 |
| Hgsnat        | 2.20753 | 4.5E-06 | 2.68071 | 2.0803  | 0.78874 | 6.81492 | 6.41801 | 8.0376  |
| Tubg1         | 2.20718 | 0.00291 | 0.88677 | 0.95457 | 0.55219 | 3.54116 | 2.27375 | 4.16083 |
| Ercc6l        | 2.20717 | 0.02017 | 0.22395 | 0.16027 | 0.059   | 0.59494 | 0.70674 | 0.40929 |
| 1810011H11Rik | 2.2058  | 0.03384 | 0.43406 | 0.36712 | 0       | 1.23979 | 0.99938 | 0.96521 |
| Dpysl3        | 2.20486 | 3.3E-09 | 4.85482 | 3.77319 | 1.64771 | 13.2233 | 12.3467 | 13.5803 |

|               |         |         |         |         |         |         |         |         |
|---------------|---------|---------|---------|---------|---------|---------|---------|---------|
| Cxx1a         | 2.20484 | 0.00505 | 13.6815 | 14.2221 | 3.66477 | 34.1301 | 23.9096 | 25.7361 |
| Bcl3          | 2.20458 | 0.00283 | 1.8083  | 1.90398 | 1.30603 | 8.4519  | 3.64982 | 8.01199 |
| Rpl30         | 2.20453 | 1.2E-06 | 9.95035 | 6.03689 | 2.96932 | 27.7432 | 17.3487 | 27.9246 |
| Psmc2         | 2.20391 | 0.00063 | 2.61431 | 1.76584 | 0.49742 | 6.29187 | 4.53537 | 7.06495 |
| Rhoj          | 2.20316 | 4.8E-06 | 3.46531 | 2.31136 | 0.86839 | 7.65574 | 7.96685 | 9.00163 |
| Cops2         | 2.20302 | 0.00375 | 5.25017 | 2.37262 | 0.94018 | 10.0731 | 8.8803  | 11.8284 |
| Tmed3         | 2.20283 | 0.00028 | 5.02153 | 3.96016 | 1.93669 | 14.0611 | 11.9808 | 16.4557 |
| Gcnt1         | 2.20099 | 0.00044 | 0.73778 | 0.5824  | 0.2246  | 1.91718 | 1.95779 | 2.04164 |
| Alg5          | 2.20099 | 0.00017 | 1.07802 | 0.74599 | 0.33564 | 2.67199 | 2.44104 | 3.23161 |
| Atp5f1        | 2.20056 | 0.00432 | 6.4971  | 2.46528 | 0.88904 | 11.742  | 8.67183 | 15.2939 |
| Btla          | 2.20056 | 0.0007  | 1.34609 | 1.28081 | 0.28813 | 4.26475 | 3.96508 | 2.68805 |
| Tinagl1       | 2.19978 | 0.01131 | 8.90741 | 4.98112 | 1.36381 | 21.2826 | 14.74   | 17.5482 |
| Psap          | 2.19894 | 1.6E-06 | 87.4431 | 90.8778 | 37.8098 | 351.783 | 226.783 | 255.22  |
| Slc41a2       | 2.19637 | 0.00018 | 1.19529 | 0.72211 | 0.3119  | 2.45196 | 3.17741 | 2.67196 |
| Ola1          | 2.19541 | 5.4E-05 | 1.79546 | 1.01961 | 0.49779 | 4.30473 | 3.75812 | 4.53891 |
| Pdlim1        | 2.19533 | 8.4E-07 | 2.88252 | 2.29112 | 0.73347 | 8.26941 | 5.91534 | 8.77746 |
| Hexa          | 2.19531 | 6.6E-05 | 8.96902 | 7.43103 | 3.13441 | 31.4683 | 17.6335 | 25.1554 |
| Slc30a4       | 2.19481 | 0.00227 | 2.01602 | 1.67694 | 0.30433 | 4.45182 | 3.88151 | 4.34068 |
| Yipf5         | 2.1946  | 0.0013  | 3.96097 | 2.81941 | 0.80588 | 9.31439 | 7.92961 | 10.5705 |
| Hspa13        | 2.19365 | 0.00372 | 2.20053 | 1.10098 | 0.30075 | 4.42231 | 3.34907 | 5.09101 |
| Ccl22         | 2.18989 | 0.00313 | 1.09998 | 1.76101 | 0.35878 | 5.35547 | 3.91407 | 3.15408 |
| F2rl1         | 2.18913 | 0.0094  | 1.22712 | 0.86957 | 0.15145 | 2.4917  | 2.08952 | 3.85828 |
| Rpl15         | 2.18895 | 6E-05   | 17.414  | 10.3454 | 4.30658 | 49.1756 | 33.8335 | 53.8194 |
| Kn1           | 2.18872 | 0.02462 | 0.17108 | 0.36175 | 0.26855 | 1.15318 | 1.33169 | 0.82345 |
| Foxm1         | 2.18866 | 0.01822 | 0.3016  | 0.5236  | 0.38055 | 1.6927  | 1.97693 | 1.09239 |
| Ier3          | 2.18852 | 7E-05   | 15.1018 | 9.49425 | 3.1346  | 47.56   | 23.7243 | 30.8314 |
| Nsg1          | 2.1882  | 0.00013 | 2.41484 | 2.42688 | 0.45406 | 7.62537 | 5.45297 | 7.28506 |
| Gnai2         | 2.18676 | 4.4E-07 | 22.7921 | 18.5617 | 7.09123 | 65.1221 | 48.7286 | 67.9579 |
| Acsl4         | 2.18526 | 0.00014 | 7.60442 | 7.26066 | 2.21854 | 22.1564 | 16.7995 | 24.7953 |
| Ap3m1         | 2.18408 | 0.0027  | 1.83587 | 1.00213 | 0.49051 | 4.78061 | 3.47205 | 4.87481 |
| F630028O10Rik | 2.18289 | 0.0117  | 1.2474  | 0.70335 | 0.37974 | 2.77119 | 2.1526  | 3.99693 |
| Psmc8         | 2.18283 | 2.2E-05 | 5.76649 | 4.06854 | 1.36436 | 13.2149 | 11.6885 | 16.5226 |
| Acot7         | 2.18277 | 0.00201 | 4.04225 | 3.27338 | 1.62004 | 11.4379 | 6.4267  | 17.4389 |
| Zyx           | 2.18093 | 6.3E-05 | 9.86243 | 6.97989 | 3.07591 | 20.8731 | 15.3441 | 28.5016 |
| Syng2         | 2.1806  | 0.00472 | 10.4401 | 7.3511  | 2.70073 | 26.6417 | 16.0125 | 23.5104 |
| Slc25a24      | 2.17964 | 3.3E-05 | 3.30104 | 2.16152 | 0.91173 | 7.90339 | 7.17694 | 8.74567 |
| Kif11         | 2.17956 | 0.00374 | 0.45489 | 0.7855  | 0.32456 | 2.30822 | 2.33273 | 1.50621 |
| Fam49b        | 2.17915 | 5.3E-05 | 2.40797 | 2.61566 | 0.72766 | 7.68093 | 6.77953 | 7.29142 |
| C1qtnf7       | 2.17895 | 0.00213 | 2.04094 | 1.00231 | 0.30064 | 3.7496  | 3.3119  | 4.3869  |
| Leptot        | 2.17779 | 0.00033 | 9.96148 | 6.30876 | 1.70306 | 20.5848 | 19.6721 | 23.7339 |
| Tsta3         | 2.17713 | 0.00118 | 1.3934  | 1.47315 | 1.1135  | 5.78304 | 4.38943 | 5.36531 |
| Cept1         | 2.17678 | 0.00572 | 2.87262 | 2.25607 | 0.70273 | 7.63676 | 5.79801 | 8.59716 |
| Ceacam1       | 2.17402 | 0.01242 | 3.22498 | 3.06027 | 1.50858 | 6.40516 | 4.82891 | 7.42361 |
| Tifab         | 2.17222 | 0.00378 | 0.6789  | 1.10423 | 0.41732 | 3.49631 | 2.35287 | 2.86652 |
| Ramp3         | 2.17188 | 0.03313 | 0.86043 | 1.28753 | 0.22668 | 2.08527 | 2.56986 | 4.71748 |
| Hyal2         | 2.17166 | 0.00017 | 3.85543 | 2.1348  | 0.75995 | 8.77237 | 6.48204 | 9.38486 |
| Nmt1          | 2.17062 | 0.0003  | 5.27963 | 3.94189 | 1.47564 | 9.78402 | 7.05544 | 9.87378 |
| Arsk          | 2.16902 | 0.04039 | 0.54664 | 0.23117 | 0.03671 | 1.00335 | 0.75382 | 1.17229 |
| Elovl7        | 2.16859 | 0.01801 | 0.35291 | 0.19899 | 0.09593 | 1.01821 | 0.55402 | 0.89492 |
| Mcm2          | 2.16656 | 2.1E-05 | 0.89121 | 0.96637 | 0.57392 | 3.43365 | 3.01336 | 2.97668 |
| Dchs1         | 2.16526 | 0.00027 | 1.5289  | 1.24419 | 0.33965 | 3.31979 | 1.87081 | 3.97436 |
| Gnl3          | 2.16522 | 1.1E-05 | 3.34694 | 2.58463 | 0.71988 | 7.55302 | 7.60459 | 9.81558 |
| Sigmar1       | 2.16451 | 0.02211 | 1.92228 | 1.50266 | 0.49875 | 5.57634 | 3.88336 | 5.86987 |
| Angptl2       | 2.16352 | 0.00572 | 3.44369 | 2.19982 | 0.76304 | 5.62554 | 3.97052 | 5.47587 |
| Rnd3          | 2.16232 | 5.5E-06 | 2.26695 | 1.77791 | 0.49407 | 5.75624 | 5.14834 | 5.84179 |
| Mrpl33        | 2.16178 | 0.00078 | 1.96988 | 1.72936 | 1.13865 | 2.74206 | 2.42956 | 3.03361 |

|               |         |         |         |         |         |         |         |         |
|---------------|---------|---------|---------|---------|---------|---------|---------|---------|
| Uck2          | 2.1593  | 1.4E-08 | 1.83879 | 1.52694 | 0.82058 | 5.43878 | 4.55559 | 6.12162 |
| Rpl6          | 2.15908 | 4.1E-05 | 30.9339 | 17.3681 | 9.98572 | 81.8611 | 58.6901 | 84.2095 |
| Kpna2         | 2.15815 | 0.00056 | 3.56067 | 2.60822 | 2.03244 | 10.5363 | 7.80228 | 11.408  |
| Rps15         | 2.15524 | 0.0001  | 85.8283 | 64.0086 | 26.8127 | 233.394 | 134.358 | 282.45  |
| Copb1         | 2.15524 | 0.00045 | 4.48343 | 2.97548 | 1.08344 | 10.7071 | 9.03845 | 11.0863 |
| Ptprc         | 2.15501 | 0.00105 | 2.76804 | 3.47587 | 0.88023 | 10.726  | 6.63146 | 9.01409 |
| Wnt2          | 2.155   | 0.01095 | 0.97211 | 0.58239 | 0.04624 | 1.84057 | 1.15726 | 3.05289 |
| Txndc17       | 2.15461 | 0.00169 | 4.20815 | 3.79257 | 1.10257 | 11.7033 | 8.69267 | 13.7902 |
| Arl6ip5       | 2.15382 | 0.00012 | 9.05775 | 7.12516 | 2.097   | 26.7105 | 18.1436 | 21.9505 |
| Actr2         | 2.15228 | 9.1E-06 | 14.2167 | 10.6733 | 4.26784 | 37.5596 | 31.9394 | 37.3569 |
| Stt3a         | 2.15196 | 0.00033 | 4.06262 | 2.89219 | 0.93224 | 9.90774 | 7.69488 | 10.7293 |
| Sept10        | 2.14883 | 0.00202 | 1.6548  | 1.09534 | 0.65709 | 4.42457 | 3.68959 | 4.80391 |
| Eif2s2        | 2.14865 | 6.4E-06 | 2.83951 | 1.9899  | 0.83355 | 6.66864 | 5.81467 | 8.31925 |
| Ms4a6b        | 2.14853 | 0.00547 | 1.18118 | 1.4813  | 0.48823 | 4.02247 | 4.26694 | 3.55375 |
| Cse1l         | 2.14786 | 0.00321 | 2.89273 | 1.6848  | 0.39549 | 5.8142  | 5.15206 | 6.2724  |
| Fndc3b        | 2.14694 | 6.5E-07 | 4.58875 | 3.82727 | 1.44355 | 12.2196 | 11.4192 | 12.4509 |
| Pole          | 2.14564 | 0.03126 | 0.17144 | 0.2175  | 0.26095 | 0.83096 | 1.00475 | 0.80369 |
| Fli1          | 2.14513 | 0.0003  | 4.61142 | 3.32409 | 1.0469  | 11.6839 | 7.88909 | 13.1584 |
| Itgav         | 2.14482 | 2.7E-08 | 3.77456 | 2.92642 | 1.11609 | 10.2243 | 7.88461 | 10.1824 |
| Twf1          | 2.14371 | 0.00032 | 7.26753 | 4.93258 | 2.69726 | 14.895  | 13.2994 | 16.6858 |
| Hist4h4       | 2.14332 | 0.04136 | 1.1804  | 0.56664 | 0.3642  | 2.41617 | 1.51916 | 3.13639 |
| Adh1          | 2.14201 | 0.0056  | 7.68986 | 5.12013 | 1.72774 | 18.1905 | 9.8587  | 22.0164 |
| Mybl1         | 2.14165 | 0.00583 | 0.28744 | 0.18591 | 0.07721 | 0.82979 | 0.49547 | 0.76186 |
| Esyt1         | 2.14001 | 4.2E-08 | 10.6771 | 9.7848  | 3.81791 | 32.4805 | 23.9559 | 27.8046 |
| Pdap1         | 2.1373  | 0.00025 | 3.62383 | 2.63057 | 1.10754 | 7.48583 | 6.4593  | 10.7299 |
| Picalm        | 2.13682 | 2.6E-05 | 7.3464  | 5.09664 | 1.58239 | 16.6948 | 14.6921 | 17.8047 |
| Rac1          | 2.13674 | 1.9E-05 | 15.0943 | 11.8902 | 4.17457 | 37.64   | 29.5871 | 38.5129 |
| Adam15        | 2.13645 | 0.00038 | 6.09413 | 5.69488 | 2.76587 | 15.6519 | 13.84   | 13.0783 |
| Ppp1ca        | 2.13561 | 1.5E-06 | 20.2016 | 14.6773 | 6.20033 | 57.1056 | 38.1877 | 61.5887 |
| Clic1         | 2.13336 | 6.7E-05 | 10.3573 | 9.40419 | 8.63616 | 44.5118 | 28.6399 | 44.7143 |
| Myo5a         | 2.13299 | 1.4E-06 | 1.43149 | 1.33598 | 0.66917 | 4.77023 | 4.39369 | 3.79124 |
| Ednra         | 2.13286 | 0.00885 | 4.47014 | 2.77914 | 0.83783 | 9.85324 | 7.52714 | 11.2052 |
| Mrpl46        | 2.13262 | 0.00372 | 1.03279 | 0.98271 | 0.36845 | 2.97232 | 2.26985 | 3.9662  |
| Mtpn          | 2.13155 | 7.7E-05 | 10.3331 | 6.90584 | 3.05442 | 26.0349 | 21.2568 | 26.4547 |
| Rfc3          | 2.13118 | 0.02625 | 0.22765 | 0.29951 | 0.14438 | 0.82757 | 0.68563 | 1.09829 |
| Lrp2          | 2.13112 | 0.00143 | 1.63523 | 2.27578 | 0.54942 | 5.71921 | 4.0386  | 6.7118  |
| Emc3          | 2.12986 | 0.0018  | 4.91183 | 3.58352 | 1.15572 | 11.904  | 9.28436 | 13.7002 |
| 0610009B22Rik | 2.12961 | 0.04367 | 1.09825 | 0.69666 | 0.31344 | 3.16069 | 1.74323 | 3.07413 |
| Csf1r         | 2.12603 | 2.1E-05 | 6.82461 | 5.96191 | 2.24125 | 21.207  | 15.3825 | 18.8872 |
| Manea         | 2.12403 | 0.0027  | 1.6327  | 0.79363 | 0.34279 | 3.52483 | 2.70843 | 3.68994 |
| Plk2          | 2.12378 | 3.7E-06 | 5.63933 | 5.07292 | 1.6746  | 19.7699 | 11.1283 | 14.7949 |
| Rabl3         | 2.12377 | 0.00257 | 0.32984 | 0.19407 | 0.16372 | 0.79938 | 0.8615  | 0.89292 |
| Brca1         | 2.12335 | 0.0192  | 0.14986 | 0.23539 | 0.14664 | 0.74582 | 0.78417 | 0.50862 |
| Dbi           | 2.12242 | 0.00197 | 7.96474 | 3.36822 | 1.39322 | 14.3993 | 11.1993 | 19.4176 |
| Bhlhe40       | 2.12213 | 0.00011 | 7.25788 | 4.48589 | 2.54942 | 21.0738 | 15.2764 | 17.2207 |
| Cd86          | 2.12195 | 0.00645 | 0.69857 | 0.73854 | 0.28482 | 2.93251 | 1.80946 | 1.73736 |
| Api5          | 2.12147 | 0.00145 | 5.90831 | 3.72236 | 1.28475 | 12.7117 | 10.4529 | 14.2743 |
| Pxdn          | 2.11942 | 0.00206 | 4.71228 | 3.80698 | 1.07372 | 12.6589 | 9.59018 | 11.4166 |
| Coro1a        | 2.11936 | 0.01259 | 4.85733 | 5.99582 | 3.82166 | 23.9813 | 14.354  | 21.3221 |
| Abcb1b        | 2.11717 | 0.00041 | 0.51513 | 0.5709  | 0.30418 | 1.75426 | 1.57458 | 1.80451 |
| Ier5l         | 2.11443 | 0.00033 | 1.29364 | 0.97896 | 0.46637 | 4.2696  | 2.1947  | 3.84882 |
| Adgrl4        | 2.11418 | 0.0077  | 8.8449  | 6.23406 | 1.34177 | 20.2531 | 15.7177 | 19.6334 |
| Pim1          | 2.11393 | 1.8E-06 | 4.74346 | 5.79827 | 3.04356 | 15.251  | 12.4036 | 16.0834 |
| Al413582      | 2.11377 | 0.03152 | 0.78401 | 0.71836 | 0.67128 | 3.28556 | 2.24959 | 2.67628 |
| Psmc1         | 2.11304 | 1.8E-05 | 11.0712 | 9.21118 | 3.29712 | 26.8314 | 24.6407 | 35.0976 |
| Rpl37a        | 2.11292 | 9.1E-05 | 42.3651 | 24.4904 | 12.202  | 107.736 | 63.3066 | 108.051 |



|         |         |         |         |         |         |         |         |         |
|---------|---------|---------|---------|---------|---------|---------|---------|---------|
| Chchd2  | 2.11266 | 0.00175 | 12.8412 | 7.42216 | 3.67639 | 21.3408 | 14.3617 | 24.7341 |
| Cd81    | 2.11177 | 0.00239 | 17.6076 | 12.5041 | 2.96987 | 43.1724 | 30.7025 | 47.642  |
| Ufm1    | 2.1093  | 0.00019 | 1.96227 | 1.27067 | 0.43753 | 4.3005  | 3.95325 | 4.84793 |
| Ctsa    | 2.10519 | 6.4E-07 | 6.10209 | 5.50511 | 3.71529 | 20.6336 | 14.9437 | 21.5203 |
| Smpdl3a | 2.10492 | 0.00877 | 6.05969 | 3.85323 | 0.9594  | 14.0159 | 9.59145 | 14.0599 |
| Procr   | 2.10485 | 0.04284 | 0.6296  | 0.38036 | 0.56474 | 2.07082 | 1.58141 | 2.2106  |
| Sh2b2   | 2.10464 | 0.01343 | 0.88063 | 0.9543  | 0.12567 | 3.06795 | 1.67334 | 2.41238 |
| Snrpb2  | 2.10414 | 0.004   | 1.85425 | 1.05454 | 0.36497 | 4.22264 | 2.90418 | 4.60969 |
| Map2    | 2.104   | 0.00068 | 0.26098 | 0.17377 | 0.09509 | 0.67623 | 0.50849 | 0.787   |
| Ddb1    | 2.10339 | 9.5E-06 | 17.4761 | 13.1449 | 5.04418 | 44.8446 | 34.3021 | 48.6973 |
| Tmem86a | 2.10177 | 0.00065 | 1.69413 | 1.10535 | 0.71835 | 4.86826 | 3.8297  | 4.28274 |
| Mrpl20  | 2.10144 | 0.00084 | 1.97605 | 1.76416 | 0.43864 | 4.85554 | 3.94081 | 6.79037 |
| Mcemp1  | 2.10023 | 0.00188 | 1.10045 | 1.18928 | 0.34897 | 3.11148 | 2.77686 | 4.15716 |
| Abce1   | 2.09982 | 0.00102 | 3.8032  | 2.44468 | 0.71205 | 8.23093 | 7.12152 | 8.57467 |
| Rpl19   | 2.09944 | 2.6E-07 | 62.2025 | 40.8935 | 23.6702 | 167.103 | 105.673 | 182.899 |
| Ywhaz   | 2.09934 | 0.00013 | 35.6762 | 23.9347 | 10.1429 | 83.6394 | 62.0943 | 85.7193 |
| Naa20   | 2.09724 | 0.00104 | 1.52846 | 1.16764 | 0.36586 | 3.5997  | 3.50369 | 3.99895 |
| Kif20b  | 2.09622 | 0.01333 | 0.29554 | 0.49992 | 0.24367 | 1.27332 | 1.61179 | 1.03574 |
| Elovl1  | 2.09562 | 0.00153 | 9.01314 | 8.84173 | 3.13656 | 26.2083 | 14.8996 | 36.7831 |
| Hmga1   | 2.0953  | 0.00116 | 3.85546 | 3.06678 | 1.57193 | 11.9579 | 9.58306 | 12.9729 |
| Lipg    | 2.09451 | 0.00402 | 2.53247 | 2.73349 | 0.46808 | 6.45899 | 4.8767  | 9.03006 |
| Casp3   | 2.09335 | 0.00077 | 1.08832 | 1.08157 | 0.5591  | 3.19807 | 2.85034 | 4.25747 |
| Kif22   | 2.09293 | 0.01674 | 0.22355 | 0.42541 | 0.27647 | 1.02711 | 1.0645  | 0.91571 |
| Ube2v1  | 2.09256 | 0.00155 | 9.53321 | 5.70658 | 2.83575 | 20.7041 | 14.1155 | 23.898  |
| Ptprj   | 2.09167 | 7.9E-10 | 5.5883  | 4.32876 | 2.1099  | 12.9603 | 11.3605 | 14.1021 |
| Pes1    | 2.09165 | 1.4E-05 | 3.77553 | 2.24807 | 1.55166 | 8.7292  | 6.63823 | 11.2095 |
| Alpl    | 2.09001 | 0.01917 | 0.72472 | 0.3831  | 0.25855 | 1.49567 | 1.19458 | 2.37493 |
| Plxnc1  | 2.09    | 6.6E-05 | 1.66683 | 1.91256 | 0.54558 | 6.44078 | 4.06467 | 4.47866 |
| Txnl4a  | 2.08941 | 0.01269 | 1.25406 | 0.77782 | 0.42949 | 3.11524 | 2.20492 | 3.11644 |
| C3      | 2.08892 | 0.00128 | 42.4809 | 40.7513 | 18.7944 | 125.152 | 99.6739 | 156.38  |
| Mrpl54  | 2.08886 | 0.00485 | 3.6535  | 1.96641 | 1.01112 | 7.5128  | 5.7586  | 11.1563 |
| Gng12   | 2.08876 | 7.5E-05 | 4.86928 | 3.38293 | 1.52205 | 11.356  | 10.3619 | 13.2815 |
| Ddx21   | 2.08813 | 7.9E-08 | 5.70138 | 4.08903 | 1.979   | 13.0939 | 12.4175 | 17.3738 |
| Atp5g1  | 2.08799 | 0.02452 | 2.41732 | 0.64481 | 0.29719 | 3.66153 | 2.84709 | 4.28073 |
| Actr3   | 2.08644 | 3.7E-06 | 11.893  | 11.0264 | 3.78268 | 33.4118 | 29.0136 | 31.9449 |
| Scfd1   | 2.08547 | 1.2E-05 | 3.71291 | 2.73392 | 1.496   | 8.99835 | 8.25616 | 12.1315 |
| Uba1    | 2.08381 | 7.2E-06 | 11.4859 | 8.60846 | 3.33219 | 30.4317 | 22.0499 | 30.9316 |
| Acadsb  | 2.08376 | 0.00075 | 4.49118 | 2.46422 | 0.75527 | 7.2846  | 7.05577 | 9.04743 |
| Grb10   | 2.08365 | 0.00023 | 2.88413 | 2.47335 | 0.86042 | 7.36728 | 7.20741 | 7.39315 |
| Krt18   | 2.08173 | 5.4E-05 | 17.0279 | 10.7049 | 9.01203 | 49.292  | 32.4052 | 59.97   |
| Ifngr2  | 2.0813  | 6.9E-06 | 4.85222 | 3.96402 | 1.35336 | 13.313  | 10.3208 | 12.7613 |
| Rps21   | 2.08114 | 0.00211 | 47.473  | 25.083  | 10.4271 | 104.736 | 61.9568 | 122.498 |
| Krt7    | 2.07981 | 1E-07   | 8.03978 | 6.85466 | 3.29589 | 22.2693 | 18.5422 | 26.2087 |
| Erap1   | 2.07873 | 0.00035 | 3.66352 | 2.92533 | 0.90919 | 9.30603 | 7.01806 | 10.2717 |
| Ndufs8  | 2.07828 | 0.02651 | 5.12173 | 1.92528 | 1.08278 | 10.6887 | 6.87894 | 11.1117 |
| Snap29  | 2.07694 | 0.01608 | 2.55713 | 2.16278 | 0.57777 | 6.92353 | 4.3321  | 6.67765 |
| Psmb5   | 2.07665 | 0.00058 | 12.5838 | 7.62761 | 5.98573 | 27.4475 | 19.2827 | 28.4367 |
| Fam217b | 2.07636 | 0.0256  | 0.96166 | 0.47446 | 0.1601  | 1.73582 | 1.76126 | 2.03527 |
| Tmtc3   | 2.07552 | 0.00031 | 1.74726 | 0.94199 | 0.44326 | 3.68355 | 3.08405 | 4.32784 |
| Clptm1  | 2.07456 | 3.4E-05 | 3.45641 | 2.4009  | 1.02424 | 8.68862 | 6.4435  | 9.50725 |
| Dcaf13  | 2.07381 | 0.0001  | 2.47336 | 2.34096 | 0.9412  | 7.56418 | 5.09076 | 8.7807  |
| Asna1   | 2.07271 | 0.00281 | 4.02115 | 1.84627 | 1.63949 | 10.3719 | 6.90175 | 10.2596 |
| Myd88   | 2.07264 | 0.00195 | 3.51026 | 3.35877 | 1.57864 | 9.25911 | 8.41611 | 11.6194 |
| Steap3  | 2.07248 | 0.00038 | 0.73518 | 0.60828 | 0.18245 | 2.01412 | 1.33475 | 2.23898 |
| Ndufb8  | 2.07218 | 0.00078 | 3.77428 | 1.64522 | 0.72917 | 6.57886 | 5.29606 | 8.61032 |
| Mrpl13  | 2.07144 | 0.00041 | 0.58697 | 0.37964 | 0.18395 | 1.32492 | 1.20572 | 1.53693 |

|          |         |         |         |         |         |         |         |         |
|----------|---------|---------|---------|---------|---------|---------|---------|---------|
| Psen1    | 2.07099 | 0.00138 | 3.60775 | 2.87771 | 1.47333 | 11.1426 | 7.04803 | 11.2219 |
| Cmk1r1   | 2.07074 | 1.1E-05 | 10.372  | 9.45246 | 2.90663 | 27.1178 | 21.951  | 31.2665 |
| Csmd1    | 2.07063 | 0.00066 | 0.17279 | 0.17862 | 0.04931 | 0.55543 | 0.43953 | 0.46793 |
| C2       | 2.0692  | 0.02359 | 0.99075 | 1.17713 | 0.32316 | 2.84417 | 2.35026 | 2.80222 |
| Calm2    | 2.06741 | 0.00418 | 35.9871 | 19.7474 | 6.32594 | 71.3722 | 54.8717 | 82.0211 |
| Rap1gds1 | 2.06687 | 1.4E-05 | 2.46499 | 1.99287 | 0.62075 | 7.06482 | 4.84212 | 5.98909 |
| B3galnt1 | 2.06674 | 0.01562 | 0.76565 | 0.87613 | 0.10283 | 2.04659 | 2.17765 | 2.14008 |
| Tmem128  | 2.06561 | 0.00076 | 1.96324 | 1.18606 | 0.58699 | 4.81462 | 3.49292 | 5.24645 |
| Klhl6    | 2.06525 | 0.0002  | 1.50711 | 1.74898 | 0.76023 | 5.139   | 4.98127 | 4.65168 |
| Cln5     | 2.06344 | 0.00043 | 3.62148 | 2.16021 | 0.95742 | 7.99148 | 7.42861 | 8.33862 |
| Nhp2     | 2.06286 | 0.00187 | 3.10835 | 2.15712 | 2.09271 | 8.40239 | 6.83146 | 12.4062 |
| Zdhhc5   | 2.06214 | 8E-06   | 5.61019 | 3.82662 | 1.67347 | 13.3224 | 11.097  | 14.9747 |
| Sardh    | 2.06061 | 0.00025 | 0.80711 | 0.95285 | 0.47989 | 2.54694 | 2.71004 | 2.86532 |
| Sema3a   | 2.06015 | 0.00864 | 0.955   | 0.69074 | 0.23308 | 2.24264 | 1.90106 | 2.40653 |
| Mtap     | 2.06009 | 0.00025 | 1.5289  | 0.74234 | 0.35554 | 3.53379 | 2.38532 | 3.45614 |
| Cd3eap   | 2.05898 | 0.01367 | 0.91631 | 0.558   | 0.46027 | 1.77656 | 1.53052 | 2.43224 |
| Mpv17l2  | 2.05797 | 0.00959 | 2.1418  | 0.93497 | 0.39437 | 4.06049 | 2.88507 | 5.49047 |
| Rpl18    | 2.05765 | 7.6E-06 | 10.618  | 8.3691  | 4.28124 | 29.99   | 17.9241 | 30.8903 |
| Atp6v0e  | 2.05671 | 0.00134 | 3.72521 | 2.41634 | 0.92728 | 9.45241 | 5.78643 | 9.70642 |
| Rbm7     | 2.05579 | 0.00119 | 3.00343 | 1.77817 | 1.02862 | 7.2789  | 5.45183 | 7.13568 |
| Amica1   | 2.05566 | 0.01878 | 0.99919 | 1.54106 | 0.50324 | 3.1694  | 2.13141 | 3.97258 |
| Sec61a1  | 2.05505 | 8.9E-08 | 5.88837 | 5.6688  | 2.41627 | 17.1478 | 15.7344 | 20.3523 |
| Tpgs2    | 2.0549  | 0.01571 | 0.45402 | 0.192   | 0.04573 | 0.75243 | 0.66522 | 0.83143 |
| Scnn1g   | 2.05436 | 0.00479 | 6.38233 | 4.18415 | 2.02198 | 17.0035 | 11.2753 | 16.5369 |
| Rcan1    | 2.05265 | 0.00032 | 4.15502 | 4.06913 | 1.53952 | 14.7956 | 9.05172 | 11.4662 |
| Smdt1    | 2.05153 | 0.00166 | 7.46305 | 4.66236 | 2.03315 | 17.3162 | 11.6803 | 21.5385 |
| Hells    | 2.0512  | 0.00485 | 0.25354 | 0.36455 | 0.18814 | 1.02154 | 1.0773  | 0.8724  |
| Edf1     | 2.05108 | 0.00475 | 8.59974 | 5.86574 | 2.3752  | 21.43   | 12.4478 | 24.0339 |
| Pycard   | 2.05014 | 0.01915 | 1.68253 | 0.99614 | 0.4116  | 3.52427 | 4.0148  | 3.6036  |
| Snrpa    | 2.04914 | 0.00239 | 2.81199 | 2.42238 | 1.30785 | 7.50906 | 5.18826 | 8.66036 |
| Tmsb4x   | 2.049   | 1.2E-08 | 163.022 | 152.588 | 65.4834 | 490.551 | 355.212 | 534.282 |
| Ap1s3    | 2.04876 | 0.00624 | 0.85688 | 0.51    | 0.32607 | 1.90363 | 1.74375 | 2.73003 |
| Sf3b6    | 2.04847 | 0.00187 | 3.44052 | 1.93995 | 1.21572 | 8.18931 | 6.24124 | 9.32845 |
| C1qtnf1  | 2.04836 | 0.02716 | 2.42128 | 2.14657 | 1.1656  | 5.99176 | 5.89846 | 6.07044 |
| Pdcd6    | 2.0471  | 0.00033 | 4.13536 | 2.73727 | 1.57365 | 9.76799 | 8.12268 | 12.717  |
| Vps35    | 2.04678 | 0.00087 | 7.1959  | 4.18077 | 1.64797 | 15.7962 | 12.1617 | 16.6107 |
| Ube2j1   | 2.04643 | 0.00024 | 5.09731 | 3.19511 | 1.21109 | 10.8798 | 9.62945 | 12.2736 |
| St8sia4  | 2.04556 | 0.04948 | 0.81088 | 0.5761  | 0.11108 | 1.97174 | 1.37819 | 1.58108 |
| Ubash3b  | 2.04339 | 6.6E-05 | 0.66078 | 0.75923 | 0.28466 | 2.26617 | 1.99114 | 1.88962 |
| Irf5     | 2.04196 | 0.00241 | 2.13802 | 3.11134 | 0.82556 | 8.53434 | 6.127   | 7.03212 |
| Mfge8    | 2.03968 | 4.3E-05 | 9.04814 | 6.84634 | 2.04367 | 24.0859 | 15.4097 | 21.8078 |
| Cenpf    | 2.039   | 0.035   | 0.21736 | 0.50385 | 0.26651 | 1.35106 | 1.62772 | 0.76504 |
| Lrpap1   | 2.03846 | 6.8E-05 | 5.01513 | 3.56604 | 1.39333 | 12.598  | 9.05508 | 13.2714 |
| Sept2    | 2.03816 | 8.9E-05 | 13.2405 | 9.2296  | 2.86529 | 29.7416 | 24.2364 | 30.5455 |
| Pcdh18   | 2.03738 | 0.01368 | 1.8213  | 1.29569 | 0.34977 | 5.0534  | 2.1947  | 4.75525 |
| Nedd9    | 2.03699 | 5.2E-05 | 7.05579 | 6.13161 | 2.27928 | 20.7524 | 15.3367 | 18.1514 |
| Plod2    | 2.03518 | 0.00725 | 3.803   | 2.88377 | 0.62378 | 8.36918 | 6.50079 | 7.66374 |
| Mfsd1    | 2.0344  | 6.3E-05 | 5.28449 | 4.26637 | 1.9538  | 14.6081 | 12.362  | 13.8982 |
| Fam20c   | 2.03388 | 0.00012 | 1.27609 | 0.8049  | 0.61728 | 4.00994 | 2.69364 | 2.97686 |
| Rap2c    | 2.03228 | 0.0014  | 2.11275 | 1.35109 | 0.79417 | 4.8237  | 4.20922 | 6.22695 |
| Tpp1     | 2.03202 | 0.00068 | 4.6164  | 3.99423 | 1.91824 | 14.6173 | 9.58866 | 13.8819 |
| Ifngr1   | 2.0317  | 0.00187 | 10.4587 | 10.284  | 2.051   | 28.7487 | 19.155  | 28.9906 |
| Tmem185a | 2.03145 | 0.00648 | 1.78096 | 1.56778 | 0.20746 | 4.25014 | 3.22185 | 4.85361 |
| Creg1    | 2.03132 | 0.00201 | 7.61791 | 4.2845  | 1.28022 | 16.3302 | 10.6234 | 17.3291 |
| P3h1     | 2.03002 | 0.00012 | 1.8049  | 1.76759 | 0.81335 | 5.48218 | 5.20205 | 5.05864 |
| Plk4     | 2.02998 | 0.0154  | 0.34273 | 0.35576 | 0.33791 | 1.19873 | 1.41519 | 1.07208 |

|               |         |         |         |         |         |         |         |         |
|---------------|---------|---------|---------|---------|---------|---------|---------|---------|
| 2700060E02Rik | 2.02995 | 0.00045 | 7.07715 | 4.19513 | 2.07162 | 14.8795 | 12.3191 | 17.5427 |
| Ltbp1         | 2.02865 | 3.4E-05 | 4.33156 | 3.11071 | 1.2238  | 9.87457 | 9.4049  | 10.3747 |
| Ywhaq         | 2.0273  | 0.00265 | 15.4865 | 8.60596 | 3.91742 | 32.5965 | 23.412  | 36.62   |
| Spon1         | 2.02687 | 0.005   | 7.2141  | 5.0896  | 1.386   | 14.6372 | 13.915  | 16.354  |
| P2ry2         | 2.02658 | 0.00019 | 1.78061 | 1.16662 | 0.31493 | 4.1786  | 3.01312 | 4.17086 |
| Tmx2          | 2.02652 | 0.00055 | 4.66488 | 3.38184 | 1.3873  | 8.1466  | 6.34671 | 9.15289 |
| Mef2a         | 2.0263  | 0.00056 | 6.49423 | 3.95917 | 1.08471 | 11.9679 | 10.8499 | 12.7833 |
| Rgs19         | 2.02626 | 0.00469 | 1.72026 | 1.21247 | 0.84165 | 5.03766 | 4.23084 | 4.26156 |
| Rps4x         | 2.02582 | 4.3E-05 | 57.457  | 40.5915 | 16.5581 | 133.82  | 90.8725 | 147.96  |
| Abhd4         | 2.02571 | 0.00039 | 3.6769  | 2.45019 | 1.43099 | 9.38364 | 6.42809 | 11.456  |
| Rarres2       | 2.02534 | 0.00562 | 4.29864 | 3.08309 | 1.3348  | 9.66781 | 6.32351 | 12.5654 |
| Pus1          | 2.0247  | 0.02622 | 1.80161 | 1.34659 | 0.81313 | 3.70625 | 2.94664 | 3.19224 |
| Gnpda1        | 2.02417 | 0.01046 | 2.17652 | 1.22724 | 0.30514 | 5.25173 | 3.38483 | 3.37856 |
| Csnk2b        | 2.02366 | 0.0004  | 4.46304 | 2.87779 | 1.16025 | 10.2808 | 6.73341 | 12.924  |
| Jak1          | 2.02328 | 4.2E-07 | 8.89742 | 7.69631 | 2.81347 | 24.4347 | 18.2583 | 24.9016 |
| Cdkn1c        | 2.02319 | 0.00213 | 5.59941 | 3.03097 | 1.17619 | 7.40941 | 6.13673 | 9.3949  |
| Top2a         | 2.02318 | 0.0242  | 0.64857 | 1.43995 | 1.05278 | 4.51904 | 4.84793 | 3.23791 |
| Mrto4         | 2.02314 | 0.01111 | 0.90953 | 0.94679 | 0.51916 | 2.64936 | 2.71651 | 3.00921 |
| Rpl13a        | 2.02286 | 4.4E-06 | 47.3106 | 33.2906 | 11.5419 | 105.758 | 81.5051 | 119.995 |
| Olfm1         | 2.02254 | 0.00025 | 2.62213 | 2.00033 | 0.52825 | 6.58845 | 4.74589 | 6.4446  |
| Adam9         | 2.02158 | 6E-07   | 11.3201 | 10.2502 | 3.52217 | 29.0215 | 26.0173 | 31.8409 |
| Rpl36a        | 2.02142 | 5.9E-05 | 15.0666 | 9.94237 | 4.59929 | 34.3074 | 27.6548 | 40.5568 |
| Dpagt1        | 2.02128 | 0.00178 | 1.94676 | 1.48865 | 0.548   | 4.3464  | 4.08318 | 4.50066 |
| Eefsec        | 2.02065 | 0.00359 | 0.68479 | 0.74466 | 0.29781 | 2.09426 | 1.81557 | 2.00363 |
| B3gnt5        | 2.01992 | 0.01621 | 0.33393 | 0.32702 | 0.10032 | 1.13938 | 0.82402 | 0.74872 |
| Rrn3          | 2.01924 | 5.9E-05 | 2.81859 | 1.86847 | 0.78269 | 6.72325 | 4.65063 | 7.88439 |
| Manbal        | 2.01766 | 0.0002  | 3.87793 | 2.93096 | 1.69547 | 10.4981 | 8.64372 | 11.2886 |
| Got2          | 2.01751 | 0.0188  | 8.00717 | 3.8849  | 1.1692  | 14.1593 | 10.4815 | 16.1201 |
| Dda1          | 2.01745 | 3.4E-05 | 3.30561 | 1.95437 | 0.80603 | 7.0779  | 6.08944 | 7.96668 |
| Atp5o         | 2.01639 | 0.03371 | 6.83314 | 2.66739 | 1.06164 | 13.0572 | 7.37557 | 16.1318 |
| Lpcat2        | 2.01621 | 0.00815 | 0.67398 | 1.02607 | 0.36932 | 2.74412 | 1.87626 | 2.58412 |
| Ntpcr         | 2.01597 | 0.00545 | 0.51256 | 0.83812 | 0.4291  | 2.09103 | 2.10278 | 2.32353 |
| Stk17b        | 2.01522 | 6.6E-06 | 4.54885 | 3.84734 | 1.10826 | 11.6293 | 8.51402 | 12.8616 |
| Necap2        | 2.01391 | 1.9E-05 | 3.86599 | 3.21986 | 1.34761 | 10.5673 | 7.22102 | 12.2579 |
| Gucy1b3       | 2.01388 | 0.00077 | 5.14021 | 3.63931 | 1.30107 | 12.5561 | 8.12774 | 14.0245 |
| Hspg2         | 2.01316 | 0.0002  | 12.5129 | 9.24948 | 3.12661 | 32.2013 | 23.469  | 27.7202 |
| Cercam        | 2.01312 | 0.01724 | 0.78297 | 0.54805 | 0.30822 | 2.04478 | 2.03727 | 1.61469 |
| Slc35a4       | 2.01274 | 0.00887 | 4.46229 | 2.12295 | 0.92332 | 8.22916 | 6.41551 | 9.48214 |
| Gorasp2       | 2.01271 | 1.5E-05 | 5.46483 | 3.8952  | 1.55967 | 12.2562 | 10.3639 | 14.6047 |
| Brox          | 2.01211 | 0.00206 | 2.88051 | 2.15873 | 0.68682 | 6.52811 | 5.00848 | 7.00494 |
| H2afx         | 2.01122 | 0.00062 | 4.15771 | 3.40488 | 0.82875 | 11.1559 | 7.88069 | 10.1106 |
| Ddx3x         | 2.00961 | 3.3E-05 | 22.5531 | 14.7125 | 5.39437 | 44.5907 | 39.3339 | 59.2023 |
| Ndufa7        | 2.0087  | 0.00748 | 4.40311 | 2.90659 | 1.2873  | 9.69505 | 6.29402 | 14.649  |
| Ptbp3         | 2.00868 | 0.00155 | 7.61961 | 5.78355 | 1.58916 | 17.4232 | 13.8299 | 17.4968 |
| Nrep          | 2.00856 | 0.00035 | 5.59729 | 5.34891 | 1.41076 | 13.0587 | 15.3371 | 13.2506 |
| Tgfbr1        | 2.00795 | 0.00035 | 4.10977 | 4.31541 | 0.94154 | 11.1459 | 8.89924 | 11.4408 |
| Arf2          | 2.00786 | 1.8E-05 | 3.29035 | 3.0406  | 0.76517 | 9.02641 | 7.09754 | 8.43635 |
| Bcap29        | 2.00767 | 0.00667 | 1.86496 | 1.15416 | 0.51928 | 3.80324 | 3.79886 | 4.73271 |
| Ppp1r2        | 2.00767 | 0.00033 | 13.4744 | 7.53379 | 2.5833  | 25.6383 | 25.62   | 29.5439 |
| Nxpe4         | 2.00745 | 0.00993 | 0.49447 | 0.58811 | 0.15876 | 1.71328 | 1.35842 | 1.16465 |
| Rps10         | 2.00743 | 8E-07   | 22.7283 | 13.6796 | 6.02912 | 53.0257 | 36.3757 | 62.3896 |
| Mrps7         | 2.00742 | 0.00031 | 2.51267 | 1.56591 | 0.80519 | 5.31498 | 5.23164 | 6.60893 |
| 2610001J05Rik | 2.0068  | 0.00073 | 1.47241 | 0.97994 | 0.38578 | 3.4368  | 2.79395 | 3.65839 |
| Chst14        | 2.00662 | 0.00129 | 1.17996 | 1.40458 | 0.69847 | 4.44837 | 3.39369 | 4.00997 |
| Pkm           | 2.00639 | 1.4E-07 | 18.0264 | 15.1538 | 7.10989 | 47.7155 | 43.4181 | 50.7388 |
| Col18a1       | 2.00552 | 5.8E-05 | 3.99382 | 2.65171 | 0.98019 | 9.89197 | 8.25337 | 8.14261 |



|               |          |         |         |         |         |         |         |         |
|---------------|----------|---------|---------|---------|---------|---------|---------|---------|
| Gpihbp1       | 2.00486  | 0.00233 | 7.36709 | 5.20255 | 1.63307 | 12.4374 | 10.1654 | 26.0466 |
| Tmem106b      | 2.00471  | 0.01478 | 4.04568 | 2.39635 | 0.90265 | 8.21594 | 7.07653 | 9.09046 |
| Cmpk1         | 2.0036   | 0.00013 | 3.92591 | 2.82353 | 1.09759 | 8.70551 | 8.82395 | 9.29892 |
| Tbx4          | 2.00262  | 1.7E-06 | 4.78039 | 3.52074 | 1.71691 | 12.0736 | 10.4866 | 12.4972 |
| Col15a1       | 2.00094  | 0.00095 | 2.34494 | 2.21449 | 0.78832 | 5.95324 | 6.724   | 5.62189 |
| Lamp2         | 2.00052  | 0.0003  | 7.97483 | 5.45097 | 2.15049 | 18.632  | 14.0454 | 20.0233 |
| Atp2a3        | -2.0019  | 4.1E-07 | 22.2247 | 17.7587 | 7.3845  | 13.8952 | 9.78168 | 17.5418 |
| Abtb1         | -2.00292 | 0.00094 | 2.4234  | 2.58989 | 1.22243 | 1.41138 | 1.80289 | 2.38554 |
| Mum1          | -2.00303 | 2.3E-05 | 2.53887 | 2.12496 | 1.16741 | 1.64508 | 1.76309 | 1.74777 |
| Arhgap26      | -2.00746 | 0.00594 | 1.77078 | 1.67154 | 1.04687 | 1.72109 | 1.80304 | 1.92135 |
| Chd5          | -2.00785 | 0.04337 | 0.34312 | 0.17735 | 0.10881 | 0.17902 | 0.15362 | 0.21083 |
| Sgip1         | -2.0096  | 0.00012 | 1.46883 | 1.17371 | 0.54522 | 1.04827 | 0.8648  | 1.28455 |
| Ppp1r14c      | -2.01118 | 0.0002  | 6.52661 | 6.13999 | 2.98829 | 3.84863 | 2.8637  | 6.26195 |
| Tacc2         | -2.01208 | 3.9E-05 | 4.83492 | 3.19957 | 1.86295 | 2.36149 | 2.20821 | 2.72356 |
| Pxylp1        | -2.0123  | 0.00084 | 1.59118 | 0.75154 | 0.75491 | 0.9265  | 0.86291 | 0.9142  |
| Hspa2         | -2.01267 | 2.2E-05 | 5.58174 | 4.16914 | 3.1447  | 4.21637 | 2.89427 | 4.60257 |
| Hpn           | -2.01315 | 0.01103 | 0.86861 | 0.77233 | 0.73735 | 0.75568 | 0.53844 | 0.91233 |
| Vps9d1        | -2.01441 | 0.01567 | 1.82569 | 2.21876 | 1.23434 | 1.93308 | 2.02571 | 1.85874 |
| Dedd2         | -2.01538 | 0.00019 | 3.22224 | 2.80281 | 1.60391 | 2.48895 | 1.79002 | 2.75244 |
| Dvl1          | -2.01544 | 0.00106 | 6.3439  | 5.58204 | 4.38291 | 5.39442 | 5.2502  | 4.47835 |
| Fdxr          | -2.0162  | 0.02118 | 0.87887 | 1.23889 | 0.85468 | 1.10443 | 0.90617 | 0.69335 |
| Nhsl1         | -2.01733 | 0.00057 | 1.15098 | 0.7284  | 0.66157 | 0.80464 | 0.82551 | 0.63962 |
| Stx4a         | -2.01827 | 0.00404 | 9.04103 | 10.2937 | 7.23372 | 7.9592  | 8.57645 | 8.38818 |
| Scarf1        | -2.019   | 0.00017 | 3.57504 | 4.38839 | 1.95035 | 3.04781 | 2.41046 | 3.44726 |
| Pank1         | -2.01912 | 0.00423 | 1.95441 | 1.00436 | 0.42364 | 1.21412 | 0.74308 | 0.87152 |
| Usp20         | -2.02104 | 0.00023 | 1.33977 | 1.5074  | 0.85595 | 1.12452 | 1.02653 | 1.19831 |
| Pnmal2        | -2.02126 | 0.00821 | 0.85897 | 0.55885 | 0.35201 | 0.50709 | 0.5002  | 0.52328 |
| Ak8           | -2.02178 | 0.00456 | 1.75555 | 1.15486 | 0.9464  | 1.27048 | 0.75023 | 1.35835 |
| Adcy6         | -2.0222  | 3.3E-06 | 9.33565 | 8.52504 | 4.10709 | 6.91633 | 5.70492 | 5.70824 |
| Zfp7          | -2.02235 | 0.0006  | 2.37498 | 2.2319  | 1.99581 | 1.77871 | 1.73989 | 2.48619 |
| Cdk11b        | -2.02411 | 0.00987 | 11.4415 | 10.6654 | 9.97693 | 8.83491 | 10.4864 | 9.51317 |
| Casz1         | -2.02436 | 7.5E-05 | 6.14197 | 6.61038 | 3.97501 | 5.21075 | 4.12187 | 5.98068 |
| Chchd6        | -2.02454 | 0.00146 | 2.34755 | 1.46623 | 1.19568 | 1.33481 | 1.11125 | 2.01201 |
| Taz           | -2.02461 | 0.00099 | 3.49072 | 3.29803 | 2.21606 | 2.97127 | 3.06873 | 2.05068 |
| Agmo          | -2.02717 | 0.00068 | 1.56952 | 0.90957 | 0.38158 | 0.75724 | 0.63879 | 1.03582 |
| Tctex1d4      | -2.02721 | 0.03545 | 4.7683  | 2.57274 | 3.47259 | 2.63997 | 2.65003 | 4.8494  |
| Csad          | -2.03008 | 0.00014 | 5.56494 | 5.18422 | 3.13045 | 4.22684 | 3.6337  | 4.55911 |
| Coq4          | -2.03011 | 0.004   | 0.96739 | 0.68183 | 0.58286 | 0.65125 | 0.62996 | 0.70448 |
| Wnt2b         | -2.03069 | 0.01311 | 1.43145 | 0.83817 | 0.43996 | 0.51704 | 0.68567 | 1.15017 |
| Intu          | -2.03204 | 0.00302 | 1.43868 | 0.90481 | 0.8563  | 1.03557 | 0.89182 | 1.01746 |
| Atat1         | -2.03263 | 0.03119 | 1.27466 | 0.84226 | 0.93221 | 1.26705 | 1.21103 | 1.02796 |
| Caskin1       | -2.03337 | 0.0275  | 0.28118 | 0.2253  | 0.16894 | 0.24209 | 0.21683 | 0.10912 |
| Napb          | -2.03654 | 0.01591 | 0.56997 | 0.46016 | 0.07394 | 0.26685 | 0.29419 | 0.38205 |
| H2-Q7         | -2.03774 | 0.04561 | 10.8791 | 24.5249 | 10.6105 | 18.6845 | 13.4768 | 12.4218 |
| Ing4          | -2.03837 | 0.00162 | 2.95302 | 2.78803 | 1.76399 | 2.36131 | 2.30172 | 2.1661  |
| Dynlt1c       | -2.0411  | 0.01915 | 3.28883 | 3.02707 | 1.79445 | 2.60802 | 2.49796 | 2.06042 |
| Cadps2        | -2.04397 | 1.7E-07 | 2.50161 | 2.22081 | 1.16632 | 1.71816 | 1.39199 | 2.06511 |
| Prkcg         | -2.04572 | 0.01837 | 1.01149 | 0.72718 | 0.49076 | 0.5822  | 0.87069 | 0.43505 |
| 4931414P19Rik | -2.04703 | 0.01923 | 0.70667 | 0.71723 | 0.3227  | 0.64224 | 0.38828 | 0.46316 |
| Obsl1         | -2.05014 | 0.00493 | 1.61812 | 1.51456 | 1.18224 | 1.62745 | 1.24075 | 1.0782  |
| H2-Q6         | -2.05148 | 0.01605 | 18.2237 | 35.0875 | 19.0039 | 23.6223 | 20.4752 | 19.1648 |
| Slc2a4rg-ps   | -2.053   | 0.0027  | 2.45531 | 1.60941 | 0.52556 | 1.58061 | 0.96683 | 1.25721 |
| Ccdc134       | -2.05306 | 0.00088 | 2.63775 | 2.57128 | 1.88842 | 2.43788 | 1.96515 | 1.86798 |
| Barx2         | -2.05325 | 0.03    | 1.2067  | 0.78508 | 0.84774 | 0.59052 | 0.71401 | 1.21673 |
| Epha1         | -2.05492 | 6.6E-06 | 2.74385 | 1.86836 | 1.14146 | 1.59201 | 1.48204 | 2.15267 |
| Unc13b        | -2.05497 | 1.1E-06 | 2.6864  | 2.0106  | 1.11395 | 1.69577 | 1.59149 | 1.68765 |

|               |          |         |         |         |         |         |         |         |
|---------------|----------|---------|---------|---------|---------|---------|---------|---------|
| Ephb6         | -2.05544 | 0.00713 | 0.60521 | 0.6552  | 0.38691 | 0.51336 | 0.30149 | 0.63465 |
| Fgfr2         | -2.05646 | 7.2E-07 | 7.30448 | 6.3594  | 2.33315 | 4.50974 | 3.14234 | 5.89123 |
| Eef2k         | -2.05696 | 3.5E-06 | 2.93444 | 2.15863 | 1.40755 | 1.88251 | 1.73425 | 2.04042 |
| Jund          | -2.05706 | 0.01897 | 63.3559 | 63.3575 | 36.57   | 58.6576 | 43.8467 | 67.4716 |
| Tspyl5        | -2.05798 | 0.04986 | 0.50135 | 0.32766 | 0.39024 | 0.31757 | 0.41737 | 0.31739 |
| Usp35         | -2.06058 | 0.03426 | 0.94999 | 1.28558 | 0.98593 | 1.23489 | 1.06292 | 0.67923 |
| C2cd5         | -2.06083 | 2.9E-05 | 2.11045 | 2.10091 | 1.37522 | 1.58987 | 1.75133 | 1.64484 |
| Cep83         | -2.06105 | 0.00072 | 9.11541 | 7.91662 | 7.54275 | 7.69124 | 7.77593 | 7.51798 |
| Exoc3l        | -2.06119 | 0.01056 | 1.45351 | 2.08551 | 0.50373 | 1.36816 | 1.38809 | 1.02068 |
| Cfap45        | -2.0612  | 0.00792 | 2.86758 | 2.96431 | 1.93993 | 2.40235 | 1.65987 | 2.90035 |
| Dnajb2        | -2.06193 | 1.4E-05 | 6.59935 | 6.05433 | 3.70558 | 5.47017 | 3.66929 | 5.45939 |
| Tdrp          | -2.06222 | 0.00462 | 1.22003 | 0.89244 | 0.45172 | 0.83909 | 0.5556  | 0.78341 |
| Bckdhh        | -2.06425 | 0.00094 | 2.68193 | 2.13994 | 1.55974 | 1.6556  | 1.81648 | 2.07282 |
| Gm28043       | -2.06498 | 0.02109 | 2.40915 | 2.1087  | 1.39114 | 2.16403 | 2.18564 | 2.00814 |
| Fgfr3         | -2.06503 | 0.00034 | 17.5836 | 11.5262 | 5.91425 | 9.40113 | 7.8991  | 11.2379 |
| Brd9          | -2.06503 | 0.00276 | 6.37769 | 6.61424 | 5.50394 | 5.8652  | 5.53439 | 5.81588 |
| 4933407K13Rik | -2.06527 | 0.01406 | 0.72423 | 1.12899 | 0.55119 | 0.69691 | 0.79064 | 0.81437 |
| Fgfr4         | -2.06662 | 0.00213 | 1.95981 | 1.39585 | 0.47102 | 1.31241 | 0.69898 | 1.18307 |
| Cetn4         | -2.06695 | 0.02156 | 1.26858 | 0.91966 | 0.72411 | 0.80978 | 0.49787 | 1.05785 |
| Usp43         | -2.06745 | 0.0004  | 1.84793 | 1.62807 | 1.69208 | 1.37621 | 1.48069 | 1.57701 |
| Fxyd3         | -2.06769 | 0.0493  | 0.67019 | 0.51825 | 0.3279  | 0.45246 | 0.21042 | 0.59612 |
| Morn4         | -2.06776 | 0.04516 | 0.85503 | 0.46793 | 0.68902 | 0.63994 | 0.33162 | 0.7417  |
| Tatdn3        | -2.06777 | 0.02717 | 1.14746 | 1.44188 | 0.93567 | 0.73495 | 1.24892 | 1.15493 |
| Phlpp1        | -2.06813 | 7.5E-06 | 7.79183 | 6.68173 | 3.27393 | 6.31097 | 4.57849 | 4.18918 |
| Ablim2        | -2.07005 | 0.0312  | 0.58325 | 0.27406 | 0.20715 | 0.17277 | 0.32284 | 0.4035  |
| Arhgef15      | -2.07028 | 0.00011 | 8.36874 | 6.6849  | 3.40977 | 6.44479 | 4.7375  | 4.43225 |
| Tst           | -2.07078 | 0.00284 | 11.6672 | 7.82385 | 5.51802 | 6.31157 | 4.57892 | 11.2653 |
| Epm2a         | -2.07212 | 0.00394 | 1.63946 | 0.89308 | 0.41239 | 0.80813 | 0.63107 | 1.02443 |
| Gm12258       | -2.07478 | 0.00186 | 1.01051 | 1.32561 | 0.824   | 0.93712 | 0.92159 | 0.96303 |
| RP23-54G8.4   | -2.07493 | 0.02021 | 0.88463 | 0.8729  | 0.39274 | 0.62531 | 0.68407 | 0.50329 |
| D2hgdh        | -2.07669 | 0.00011 | 2.45359 | 1.94889 | 0.80377 | 1.56415 | 1.32858 | 1.32843 |
| Klrg2         | -2.07699 | 0.00456 | 0.85412 | 0.9933  | 0.51801 | 0.54984 | 0.64528 | 0.87468 |
| Fahd2a        | -2.07732 | 0.02949 | 1.1862  | 1.16168 | 0.42763 | 1.02131 | 0.59458 | 0.71607 |
| Cbs           | -2.07754 | 0.02929 | 0.65573 | 0.41595 | 0.40548 | 0.31453 | 0.3803  | 0.58198 |
| Odf2          | -2.07779 | 4.5E-05 | 4.22663 | 3.55145 | 2.8173  | 3.01276 | 3.32576 | 3.16848 |
| Spag1         | -2.07834 | 0.00014 | 1.7961  | 1.05325 | 0.65614 | 1.08822 | 0.89475 | 0.94174 |
| Cnn1          | -2.07937 | 0.02664 | 15.056  | 4.15059 | 2.32477 | 6.5534  | 3.81523 | 6.18104 |
| Arvcf         | -2.07972 | 2.2E-05 | 2.85741 | 1.97187 | 1.08734 | 1.74848 | 1.32264 | 1.94497 |
| Dock9         | -2.08001 | 1.2E-09 | 16.3694 | 14.8767 | 7.48281 | 10.2729 | 10.2753 | 12.6202 |
| Mrvi1         | -2.08009 | 0.00215 | 2.86308 | 1.04104 | 0.88586 | 1.15916 | 1.29377 | 1.4797  |
| Polr3gl       | -2.08062 | 0.00068 | 6.7488  | 6.24012 | 3.46048 | 4.4355  | 3.64525 | 4.12332 |
| Ccdc85a       | -2.08165 | 1E-05   | 4.12729 | 3.67918 | 1.76503 | 2.63561 | 2.63007 | 2.83386 |
| Rdm1          | -2.08239 | 0.00046 | 2.66764 | 1.96195 | 1.32408 | 1.79196 | 1.44448 | 1.8054  |
| Por           | -2.08268 | 4.1E-05 | 41.1371 | 20.1535 | 14.3921 | 21.4285 | 15.6758 | 26.8722 |
| Kctd13        | -2.08277 | 0.00648 | 1.90975 | 1.98798 | 1.34165 | 2.00265 | 1.5605  | 1.47431 |
| Pfkfb2        | -2.08349 | 0.00015 | 6.17126 | 5.99746 | 3.2008  | 3.98174 | 3.78201 | 4.50894 |
| Anks1         | -2.08608 | 4.1E-07 | 8.70795 | 8.53306 | 4.53989 | 5.33798 | 5.58313 | 7.63689 |
| Mapt          | -2.08729 | 1.2E-05 | 9.49639 | 7.21126 | 2.53375 | 6.03293 | 4.47807 | 4.96806 |
| Tle6          | -2.0921  | 0.00584 | 0.70988 | 0.57539 | 0.4052  | 0.53763 | 0.43338 | 0.43618 |
| Igfbp3        | -2.09341 | 0.02361 | 3.56012 | 2.44343 | 0.4997  | 1.32603 | 1.62473 | 2.10382 |
| Sec14l2       | -2.09376 | 0.0007  | 1.82415 | 1.65303 | 0.59499 | 1.1368  | 0.99272 | 1.28095 |
| Gm16432       | -2.09685 | 0.00535 | 0.9726  | 0.54351 | 0.35689 | 0.45248 | 0.59801 | 0.54069 |
| Cep290        | -2.09714 | 1.5E-05 | 3.76485 | 2.93337 | 2.46157 | 2.73036 | 2.57423 | 2.7666  |
| Sh3glb2       | -2.09723 | 0.00359 | 3.09037 | 3.81418 | 3.37118 | 3.25936 | 2.88448 | 3.58204 |
| Crel1         | -2.09773 | 0.0033  | 3.23128 | 4.12981 | 2.81446 | 3.37898 | 2.61271 | 3.31396 |
| Fam167a       | -2.09804 | 0.00266 | 4.31684 | 3.45229 | 3.22036 | 3.21111 | 2.78675 | 4.07935 |

|               |          |         |         |         |         |         |         |         |
|---------------|----------|---------|---------|---------|---------|---------|---------|---------|
| Rpgrip1       | -2.09903 | 0.01509 | 0.21797 | 0.24157 | 0.11155 | 0.19127 | 0.21475 | 0.14163 |
| Pnpla6        | -2.09952 | 3.8E-06 | 3.02324 | 2.82784 | 1.89233 | 2.41377 | 2.2424  | 2.11416 |
| Mettl24       | -2.1003  | 0.00466 | 1.61289 | 1.56626 | 0.81835 | 1.15819 | 0.78773 | 1.46819 |
| Cd300lg       | -2.1015  | 0.02729 | 1.76869 | 1.2419  | 0.30478 | 0.82899 | 0.44006 | 1.47635 |
| Map3k13       | -2.10329 | 0.0003  | 0.5718  | 0.62179 | 0.41963 | 0.48667 | 0.39895 | 0.50191 |
| Szt2          | -2.10495 | 3.2E-05 | 4.06726 | 4.87552 | 2.31288 | 3.22858 | 3.39411 | 2.99391 |
| Ppp1r26       | -2.10516 | 4.1E-05 | 1.10535 | 0.90739 | 0.51959 | 0.80759 | 0.66687 | 0.63922 |
| Cd24a         | -2.10552 | 1.4E-05 | 57.1037 | 39.075  | 36.7375 | 37.2364 | 28.4252 | 48.4358 |
| Hip1r         | -2.10658 | 0.0003  | 5.71402 | 5.5352  | 4.45726 | 4.80628 | 4.93065 | 4.70156 |
| Trim14        | -2.10908 | 0.0066  | 1.53703 | 1.5315  | 1.3701  | 1.78598 | 1.31112 | 0.96598 |
| St5           | -2.10953 | 7.8E-08 | 12.4161 | 13.1401 | 6.77819 | 9.8084  | 9.36413 | 8.41141 |
| Fam221a       | -2.10955 | 0.0193  | 0.94221 | 0.41053 | 0.45633 | 0.39788 | 0.50201 | 0.60818 |
| Hemk1         | -2.11031 | 0.01643 | 0.90185 | 0.8899  | 0.57198 | 0.74373 | 0.80751 | 0.43099 |
| Nlrc5         | -2.11338 | 0.02319 | 2.51654 | 5.3575  | 3.78142 | 4.16368 | 4.37265 | 2.43174 |
| Exd2          | -2.11424 | 3.7E-06 | 3.16095 | 3.06868 | 1.66307 | 2.81446 | 1.83241 | 2.02666 |
| Trim39        | -2.11431 | 9.3E-06 | 3.21193 | 2.9305  | 2.07879 | 2.59729 | 2.39936 | 2.15484 |
| Mecom         | -2.11433 | 9.1E-07 | 3.65972 | 2.79601 | 1.95103 | 2.53637 | 2.1689  | 2.75782 |
| Wdpcp         | -2.11504 | 0.00133 | 1.43148 | 0.80715 | 0.91374 | 0.80203 | 0.89082 | 1.05926 |
| Dzip1l        | -2.1157  | 0.00079 | 4.68951 | 4.3646  | 3.29278 | 4.13711 | 3.82362 | 2.89349 |
| Sclt1         | -2.11678 | 1.4E-05 | 1.85431 | 1.56834 | 0.94084 | 1.23272 | 1.17921 | 1.27651 |
| D430042O09Rik | -2.11761 | 3.6E-06 | 3.34396 | 3.37008 | 2.25246 | 2.75574 | 2.45915 | 2.6346  |
| Cadm4         | -2.11839 | 0.01216 | 2.40918 | 1.25119 | 1.01328 | 1.45968 | 0.86699 | 1.59284 |
| Zc2hc1c       | -2.11853 | 0.00016 | 1.2431  | 0.74115 | 0.58161 | 0.70379 | 0.65689 | 0.76799 |
| BC022687      | -2.12015 | 0.00663 | 2.71866 | 2.13804 | 1.68795 | 1.99397 | 1.60732 | 2.03191 |
| Oscp1         | -2.12361 | 0.00012 | 1.25168 | 0.94102 | 0.69461 | 0.7373  | 0.76414 | 0.93999 |
| Ppp1r12b      | -2.12609 | 1.2E-06 | 6.91642 | 4.11548 | 2.51402 | 3.69119 | 3.95114 | 3.51647 |
| Zfp783        | -2.1292  | 0.00389 | 0.4935  | 0.39483 | 0.35021 | 0.33941 | 0.41039 | 0.32781 |
| Rsrp1         | -2.13109 | 3.8E-08 | 51.3552 | 45.7882 | 29.8274 | 42.8475 | 34.9052 | 31.6163 |
| Dus3l         | -2.13136 | 0.01674 | 4.75923 | 5.2664  | 4.16543 | 4.3253  | 4.09673 | 4.38641 |
| Krba1         | -2.13178 | 0.00021 | 1.40944 | 1.27544 | 1.01267 | 1.14657 | 0.92424 | 1.18699 |
| Rhpn2         | -2.13304 | 8.2E-05 | 2.11756 | 1.393   | 1.34301 | 1.45406 | 1.36171 | 1.29148 |
| Trmt13        | -2.13378 | 0.01878 | 0.97283 | 0.8881  | 0.8109  | 0.84203 | 0.88237 | 0.56928 |
| Ccdc61        | -2.13621 | 0.01351 | 2.28129 | 2.43915 | 2.06381 | 2.39928 | 1.70279 | 1.93949 |
| Ulk3          | -2.13721 | 0.00064 | 1.86762 | 1.65393 | 1.17892 | 1.34456 | 1.36821 | 1.27805 |
| Unc45b        | -2.13768 | 6.8E-05 | 4.18775 | 3.21524 | 1.23    | 2.46338 | 2.2637  | 2.59811 |
| Mlf1          | -2.13815 | 0.00142 | 4.30387 | 2.29194 | 1.51646 | 2.15693 | 1.40133 | 2.96007 |
| Sox11         | -2.13969 | 0.00404 | 1.60453 | 1.48722 | 0.40148 | 0.95884 | 0.6763  | 1.15246 |
| Pi16          | -2.1407  | 0.00189 | 3.96323 | 2.51887 | 1.62148 | 1.72113 | 2.03073 | 2.96538 |
| Tmc4          | -2.14128 | 0.0001  | 5.97536 | 6.46171 | 5.23794 | 5.44348 | 3.86159 | 6.66117 |
| Actr5         | -2.14155 | 0.001   | 1.7674  | 1.82702 | 1.22057 | 1.441   | 1.53456 | 1.10831 |
| Ddx55         | -2.14183 | 0.00052 | 1.8906  | 1.79515 | 1.36422 | 1.49129 | 1.54184 | 1.3151  |
| Dnal1         | -2.142   | 1.8E-07 | 3.05424 | 2.54982 | 1.60811 | 2.32112 | 1.75529 | 1.98451 |
| Chd1l         | -2.14276 | 0.00026 | 2.24688 | 2.00794 | 1.30672 | 1.63104 | 1.50629 | 1.54555 |
| Lamc3         | -2.14282 | 0.00044 | 3.10407 | 2.54927 | 1.18121 | 1.36283 | 1.66981 | 2.54303 |
| Plcg1         | -2.14286 | 9.2E-05 | 13.9035 | 13.4505 | 7.47166 | 9.36065 | 8.99331 | 9.30481 |
| Klf5          | -2.14418 | 0.00042 | 10.1899 | 5.65585 | 6.05877 | 7.23502 | 3.88805 | 8.17422 |
| Kcp           | -2.14427 | 0.02169 | 0.29249 | 0.30675 | 0.17363 | 0.20557 | 0.21427 | 0.21087 |
| Slc1a5        | -2.14537 | 3.3E-09 | 18.7578 | 13.514  | 8.89543 | 11.7761 | 10.118  | 12.6956 |
| Nek1          | -2.14777 | 1E-06   | 2.93031 | 2.28248 | 1.41479 | 2.05612 | 1.62913 | 1.88828 |
| Rhobtb1       | -2.15157 | 8.4E-06 | 3.77378 | 2.14906 | 1.2873  | 1.831   | 1.68522 | 2.31569 |
| Dhrs11        | -2.15247 | 0.0135  | 1.3675  | 1.25299 | 0.65048 | 1.0702  | 0.87659 | 0.70021 |
| Zdhhc14       | -2.15321 | 2.2E-05 | 2.60965 | 2.18239 | 0.9038  | 1.51008 | 1.58959 | 1.51339 |
| Anks6         | -2.15394 | 0.00556 | 0.71507 | 0.87032 | 0.49776 | 0.66573 | 0.52386 | 0.57154 |
| 1700088E04Rik | -2.15455 | 0.00179 | 1.86403 | 1.40139 | 0.61081 | 0.73201 | 0.60692 | 1.01808 |
| Wdr19         | -2.15613 | 1.7E-06 | 1.61165 | 1.00692 | 0.78587 | 0.98138 | 0.88403 | 0.95543 |
| Mapre3        | -2.15641 | 7E-06   | 6.04692 | 5.47172 | 3.55711 | 4.19169 | 3.81091 | 4.82418 |



|               |          |         |         |         |         |         |         |         |
|---------------|----------|---------|---------|---------|---------|---------|---------|---------|
| Scube3        | -2.15755 | 0.00017 | 1.62425 | 0.82961 | 0.43346 | 0.88186 | 0.61814 | 0.76903 |
| Clec9a        | -2.15794 | 0.00011 | 6.43496 | 7.06127 | 2.18486 | 4.65507 | 3.90141 | 3.93119 |
| Adcy9         | -2.16053 | 5.8E-08 | 4.93859 | 4.17698 | 2.86912 | 3.82278 | 2.88408 | 3.44124 |
| Smarca2       | -2.16074 | 2.6E-08 | 12.3277 | 12.0254 | 6.39232 | 10.2103 | 7.16061 | 9.13067 |
| Rnf31         | -2.16211 | 0.00011 | 4.32334 | 5.95595 | 3.53463 | 4.59831 | 3.51302 | 3.99046 |
| Armc9         | -2.16212 | 0.00024 | 1.02532 | 0.82562 | 0.52112 | 0.67228 | 0.76658 | 0.55233 |
| Tmem8         | -2.16316 | 1.7E-05 | 2.7686  | 3.07758 | 1.62548 | 2.10879 | 2.27938 | 1.79296 |
| Rsph9         | -2.16328 | 0.00017 | 3.53491 | 2.55577 | 1.6923  | 2.31446 | 1.29483 | 2.80258 |
| Plekha5       | -2.16733 | 1.3E-05 | 2.98731 | 2.73304 | 1.8389  | 2.42511 | 2.05975 | 1.9435  |
| 1110038F14Rik | -2.1675  | 0.00175 | 7.05379 | 6.88382 | 5.16195 | 5.86274 | 4.77006 | 5.77887 |
| Gnb5          | -2.17028 | 0.00257 | 1.29016 | 1.2896  | 1.23854 | 1.26136 | 1.07405 | 0.81675 |
| Trim45        | -2.17154 | 0.01512 | 0.31968 | 0.30901 | 0.43446 | 0.37816 | 0.2342  | 0.31179 |
| Eva1c         | -2.17158 | 9.6E-05 | 2.35183 | 1.23814 | 1.15066 | 1.06143 | 1.21309 | 1.63184 |
| 4933427D14Rik | -2.1719  | 8.8E-06 | 1.97201 | 1.73569 | 1.06157 | 1.44736 | 1.17454 | 1.32661 |
| Rnf215        | -2.17308 | 2.2E-06 | 7.52962 | 7.06064 | 4.48479 | 5.47944 | 4.76667 | 5.79991 |
| Bbs1          | -2.17317 | 6E-06   | 1.75114 | 1.43956 | 0.74733 | 1.00149 | 0.97115 | 1.19329 |
| Stx1b         | -2.17429 | 0.04653 | 0.36139 | 0.28957 | 0.32571 | 0.19591 | 0.3623  | 0.24933 |
| Fam214a       | -2.17443 | 0.00017 | 3.12395 | 3.27072 | 2.18378 | 2.40137 | 2.84308 | 2.00686 |
| AU020206      | -2.17766 | 0.00061 | 13.2272 | 17.5465 | 5.88117 | 11.3042 | 9.89419 | 8.327   |
| Slain1        | -2.17773 | 0.01496 | 0.77876 | 0.98799 | 0.85729 | 0.89312 | 0.73352 | 0.66079 |
| Dapk2         | -2.17868 | 0.0002  | 3.97911 | 3.60743 | 1.39543 | 2.28482 | 2.0958  | 2.81248 |
| Fuom          | -2.18292 | 0.00578 | 0.58621 | 0.66108 | 0.44615 | 0.49048 | 0.34765 | 0.526   |
| Zfp704        | -2.18566 | 0.00074 | 4.70609 | 3.5904  | 2.08475 | 4.5781  | 3.66258 | 4.71881 |
| Col27a1       | -2.18605 | 0.00846 | 1.51505 | 2.41449 | 1.42531 | 1.76363 | 1.71111 | 1.16651 |
| Frs3          | -2.18649 | 0.01323 | 0.6132  | 0.54333 | 0.36668 | 0.51306 | 0.40644 | 0.33491 |
| Polm          | -2.18749 | 0.00026 | 1.77282 | 1.79508 | 1.22572 | 1.48259 | 1.29875 | 1.20692 |
| Dgka          | -2.18867 | 0.0007  | 9.17279 | 11.0871 | 7.53814 | 9.24302 | 7.31566 | 7.70141 |
| 1810019D21Rik | -2.19183 | 0.01001 | 3.59226 | 2.73942 | 1.81517 | 1.89105 | 1.59626 | 3.18421 |
| Tbc1d17       | -2.19205 | 0.00013 | 2.13177 | 2.22399 | 1.49021 | 1.92318 | 1.6718  | 1.62337 |
| Syde2         | -2.19635 | 3.3E-06 | 3.55758 | 1.92088 | 1.16038 | 1.49151 | 2.01287 | 1.65246 |
| Dtx1          | -2.19779 | 0.00967 | 0.41134 | 0.69581 | 0.42487 | 0.629   | 0.2583  | 0.40118 |
| Dnaaf2        | -2.20006 | 0.00093 | 2.23629 | 3.05361 | 1.75324 | 1.66509 | 1.38169 | 1.83209 |
| Dynlrb2       | -2.20084 | 0.0176  | 17.5776 | 9.30911 | 5.62616 | 8.46023 | 3.36973 | 14.5351 |
| Ift88         | -2.20319 | 2.7E-05 | 3.47351 | 2.57061 | 2.16293 | 2.46327 | 1.735   | 2.74869 |
| Gpd1          | -2.20392 | 0.00546 | 6.01514 | 2.2959  | 1.69032 | 2.5044  | 1.37849 | 4.06871 |
| Tspan1        | -2.20534 | 1.7E-05 | 10.0005 | 7.33046 | 5.95453 | 6.51057 | 4.19465 | 9.18895 |
| Pan2          | -2.20685 | 2.5E-05 | 4.16664 | 4.39207 | 2.43691 | 3.17116 | 3.08252 | 2.75774 |
| Mmp28         | -2.20829 | 0.00014 | 4.07883 | 3.2504  | 0.96897 | 2.42844 | 1.77906 | 1.7191  |
| 9230110C19Rik | -2.20905 | 0.00878 | 1.54907 | 1.31017 | 0.91696 | 1.21664 | 0.5464  | 1.31609 |
| Fbf1          | -2.20959 | 0.00038 | 3.382   | 3.0797  | 2.32731 | 2.4989  | 2.37404 | 2.59695 |
| Stk11ip       | -2.20979 | 0.00021 | 2.57647 | 2.7979  | 2.28769 | 2.42829 | 2.15549 | 2.05867 |
| Cep250        | -2.21001 | 0.00017 | 3.8039  | 4.47588 | 2.64373 | 3.30769 | 3.52209 | 3.12358 |
| Aldh5a1       | -2.21172 | 0.00649 | 1.37484 | 0.88921 | 0.59088 | 0.65659 | 0.73466 | 0.92758 |
| Gramd2        | -2.21297 | 3.3E-09 | 11.8897 | 8.81007 | 4.77359 | 6.86113 | 6.32286 | 7.02207 |
| Sidt1         | -2.21461 | 0.00636 | 0.69847 | 0.52206 | 0.51922 | 0.66924 | 0.4284  | 0.33269 |
| Whrn          | -2.21641 | 0.00226 | 0.57265 | 0.53698 | 0.56847 | 0.52044 | 0.48336 | 0.41815 |
| Acad12        | -2.21769 | 0.00015 | 1.07934 | 0.66392 | 0.38406 | 0.56053 | 0.52372 | 0.49381 |
| Scgb3a2       | -2.21903 | 0.01166 | 236.855 | 97.4425 | 111.618 | 146.399 | 59.4616 | 173.807 |
| Zfp94         | -2.21908 | 0.01352 | 0.7026  | 0.37415 | 0.4456  | 0.47299 | 0.45753 | 0.25583 |
| Trim65        | -2.22092 | 7.6E-05 | 2.42201 | 1.98283 | 0.92166 | 2.3705  | 1.95633 | 2.27679 |
| Il17rc        | -2.22149 | 0.0002  | 4.03513 | 4.62759 | 2.88884 | 3.16997 | 3.08137 | 3.38985 |
| Map3k12       | -2.22468 | 0.00043 | 1.60598 | 1.27234 | 0.85868 | 1.15779 | 1.39248 | 0.89935 |
| Epb41l4b      | -2.22533 | 7.8E-07 | 3.11402 | 1.79655 | 1.04766 | 1.71805 | 1.2313  | 1.72331 |
| Ccp110        | -2.22588 | 6.3E-09 | 3.51809 | 2.76968 | 1.74291 | 2.27231 | 1.856   | 2.37466 |
| Slc8a2        | -2.22683 | 0.0416  | 0.46875 | 0.17621 | 0.11892 | 0.15778 | 0.21622 | 0.21335 |
| Ppp2r3d       | -2.22893 | 0.01762 | 2.09324 | 1.95768 | 1.74628 | 1.71946 | 1.75467 | 1.48405 |

|               |          |         |         |         |         |         |         |         |
|---------------|----------|---------|---------|---------|---------|---------|---------|---------|
| A330076H08Rik | -2.23196 | 0.00669 | 0.82138 | 0.67734 | 0.37508 | 0.49766 | 0.4513  | 0.53834 |
| Ogfod2        | -2.232   | 0.001   | 2.38448 | 2.93967 | 1.89165 | 1.71407 | 1.89489 | 2.41704 |
| Cyb5rl        | -2.23229 | 0.00035 | 0.62695 | 0.45748 | 0.39295 | 0.36496 | 0.43228 | 0.38271 |
| Pon1          | -2.2325  | 0.01615 | 5.57859 | 1.67939 | 1.25932 | 2.53975 | 1.47773 | 2.3497  |
| Spata1        | -2.23275 | 0.04866 | 0.81967 | 0.43095 | 0.15174 | 0.26844 | 0.48688 | 0.29039 |
| Rsad1         | -2.23365 | 0.00154 | 1.60168 | 0.59817 | 0.52243 | 0.64275 | 0.65527 | 0.80095 |
| Otud3         | -2.23436 | 0.00018 | 5.14732 | 4.86297 | 3.68826 | 3.78222 | 3.24939 | 4.39642 |
| Fam81b        | -2.23476 | 0.00542 | 0.80007 | 0.74218 | 0.67766 | 0.60985 | 0.41596 | 0.82462 |
| Rsph3b        | -2.23646 | 0.00628 | 7.35681 | 6.27012 | 4.4577  | 5.04025 | 4.68476 | 7.18617 |
| Smyd3         | -2.237   | 4E-05   | 1.15365 | 0.83274 | 0.7834  | 0.68693 | 0.69944 | 0.91255 |
| Car8          | -2.23763 | 4.6E-06 | 8.79477 | 7.97981 | 5.46661 | 6.23345 | 4.23744 | 8.27333 |
| Mall          | -2.2396  | 0.00377 | 1.82129 | 1.07829 | 1.19554 | 1.43453 | 0.7672  | 1.08177 |
| Hist2h2be     | -2.24111 | 0.00475 | 1.1853  | 0.91405 | 1.03476 | 1.03498 | 0.61295 | 0.9425  |
| Cc2d2a        | -2.24279 | 2.7E-07 | 3.31332 | 2.33718 | 1.68451 | 1.99123 | 1.87699 | 2.01112 |
| Olfml2a       | -2.24319 | 1.6E-06 | 4.09292 | 2.28474 | 1.45782 | 2.24176 | 1.81106 | 2.01189 |
| Paxbp1        | -2.24358 | 0.00029 | 6.10244 | 6.15714 | 3.82404 | 5.10397 | 4.34912 | 3.79035 |
| Hdac7         | -2.24435 | 1.3E-05 | 14.9807 | 16.2326 | 10.3894 | 12.6391 | 10.8901 | 11.2311 |
| Muc4          | -2.24572 | 0.00266 | 6.26164 | 6.91238 | 8.02634 | 7.78062 | 4.2799  | 7.86668 |
| Ciz1          | -2.24581 | 0.00187 | 3.58811 | 3.62735 | 3.0055  | 3.07444 | 3.14191 | 2.66128 |
| Slc16a7       | -2.24663 | 0.0001  | 3.24029 | 1.50079 | 0.96882 | 1.61733 | 1.10778 | 1.64334 |
| Nr3c2         | -2.24712 | 4.1E-06 | 2.22912 | 1.14553 | 1.01469 | 1.17963 | 0.8682  | 1.42168 |
| Proca1        | -2.24845 | 0.0449  | 0.6999  | 0.92495 | 0.24969 | 0.55658 | 0.54479 | 0.35838 |
| Mzf1          | -2.24901 | 0.00516 | 0.30895 | 0.27997 | 0.26452 | 0.27409 | 0.2425  | 0.16271 |
| 3110062M04Rik | -2.24915 | 0.00384 | 1.60467 | 1.17624 | 0.51293 | 1.1278  | 1.41068 | 1.59509 |
| Sec14l3       | -2.24962 | 8.3E-06 | 177.688 | 111.965 | 72.0986 | 100.284 | 63.5725 | 125.924 |
| Sdccag8       | -2.25049 | 5.5E-05 | 3.38451 | 4.02255 | 2.29806 | 3.23006 | 2.52809 | 2.75466 |
| Cables1       | -2.25159 | 0.0002  | 3.71051 | 2.79716 | 1.41198 | 2.4762  | 1.7334  | 1.93846 |
| Bspry         | -2.25187 | 2E-05   | 2.79605 | 2.16778 | 1.72899 | 1.69408 | 1.47938 | 2.22705 |
| Cfap53        | -2.25203 | 0.00085 | 2.31857 | 2.94151 | 2.44637 | 2.25616 | 1.75004 | 2.64779 |
| Ccdc181       | -2.25246 | 0.00019 | 8.03809 | 7.00081 | 6.22679 | 6.58049 | 4.59175 | 6.97724 |
| Sobp          | -2.25269 | 0.01942 | 0.52863 | 0.36327 | 0.60349 | 0.42038 | 0.45989 | 0.39248 |
| Ptms          | -2.25346 | 0.0195  | 92.6352 | 117.858 | 90.682  | 101.553 | 76.0472 | 97.5688 |
| Zfp276        | -2.25351 | 0.00296 | 2.98953 | 3.19903 | 1.81014 | 2.30166 | 2.66201 | 2.368   |
| Scrib         | -2.25418 | 0.0002  | 7.13376 | 7.25919 | 5.19903 | 5.68256 | 5.41279 | 5.29647 |
| Gramd1c       | -2.25613 | 0.00053 | 1.01931 | 0.67738 | 0.74806 | 0.59553 | 0.52005 | 0.89473 |
| Cpe           | -2.25623 | 0.02168 | 8.19203 | 2.30956 | 1.07908 | 2.92714 | 2.12871 | 3.04019 |
| Rfx5          | -2.25656 | 0.00063 | 2.30961 | 2.06586 | 1.65029 | 2.58729 | 2.27629 | 2.28693 |
| Foxq1         | -2.25782 | 0.00077 | 2.34111 | 1.22298 | 1.45422 | 1.4393  | 1.28631 | 1.94617 |
| Zfp839        | -2.2589  | 0.00019 | 2.84434 | 2.34348 | 1.37162 | 1.97589 | 1.63466 | 1.5468  |
| Bbox1         | -2.25918 | 0.02839 | 0.49787 | 0.24563 | 0.14209 | 0.22624 | 0.15197 | 0.30591 |
| Magi1         | -2.26035 | 2.7E-06 | 3.3413  | 3.16923 | 2.06986 | 2.20753 | 2.20746 | 2.60299 |
| Calcoco1      | -2.26079 | 1.3E-09 | 10.4175 | 8.14818 | 4.65709 | 6.67485 | 4.76143 | 6.9863  |
| Macrodl       | -2.26335 | 0.00071 | 3.44129 | 2.06166 | 1.71876 | 1.82439 | 1.20801 | 2.70183 |
| Irx3          | -2.26428 | 0.00018 | 6.31625 | 4.97857 | 2.71816 | 3.22582 | 1.96234 | 5.44555 |
| E4f1          | -2.2649  | 0.00024 | 4.52943 | 4.34371 | 3.05364 | 3.34935 | 3.16146 | 3.21405 |
| Fos           | -2.26568 | 0.0269  | 18.2132 | 15.6014 | 12.7679 | 10.0233 | 14.9929 | 13.585  |
| Med12l        | -2.26718 | 0.0005  | 0.45086 | 0.25422 | 0.34313 | 0.30785 | 0.24641 | 0.26383 |
| Neurl4        | -2.26743 | 1.3E-05 | 5.42845 | 5.33902 | 3.09857 | 4.00319 | 3.54508 | 3.58325 |
| Zbtb32        | -2.26846 | 0.03871 | 0.62003 | 0.42608 | 0.30967 | 0.37566 | 0.36906 | 0.28573 |
| Aqp4          | -2.26974 | 0.00019 | 1.29404 | 1.17048 | 1.12848 | 1.00182 | 0.869   | 1.11905 |
| Nr1d2         | -2.27053 | 7.7E-06 | 16.401  | 10.9058 | 3.98237 | 8.37678 | 6.48929 | 8.07991 |
| Lmbr1l        | -2.27264 | 0.00015 | 3.09729 | 3.24249 | 1.63195 | 2.03407 | 2.23732 | 1.98739 |
| Calml4        | -2.27337 | 0.00075 | 4.01941 | 2.05145 | 2.3734  | 1.80547 | 1.87845 | 3.06583 |
| Plxna3        | -2.27504 | 6.6E-05 | 0.78819 | 0.53919 | 0.50283 | 0.59694 | 0.45005 | 0.38934 |
| Upf3b         | -2.27563 | 0.00024 | 3.38034 | 3.41924 | 2.81603 | 2.65698 | 2.7776  | 2.58224 |
| Srrt          | -2.27604 | 0.0006  | 11.2343 | 12.124  | 8.94778 | 8.70621 | 9.73586 | 8.54739 |

|               |          |         |         |         |         |         |         |         |
|---------------|----------|---------|---------|---------|---------|---------|---------|---------|
| Grin2d        | -2.27651 | 0.00125 | 0.5213  | 0.48732 | 0.2819  | 0.34078 | 0.39195 | 0.39336 |
| Amt           | -2.27994 | 0.00048 | 1.42422 | 1.64838 | 0.47065 | 1.13541 | 0.68643 | 0.92116 |
| Dnhd1_2       | -2.28037 | 0.00896 | 0.421   | 0.3667  | 0.40888 | 0.30076 | 0.31763 | 0.33976 |
| Dennd3        | -2.28054 | 5.7E-05 | 12.1239 | 13.7761 | 8.4836  | 7.82113 | 9.51546 | 10.8642 |
| Fuz           | -2.28077 | 4.4E-05 | 1.98997 | 1.77572 | 1.08377 | 1.43797 | 1.36421 | 1.2115  |
| Txlng         | -2.28126 | 6.3E-09 | 3.65786 | 3.08351 | 1.61779 | 2.12083 | 2.0231  | 2.26243 |
| Ano8          | -2.28222 | 0.00518 | 1.61412 | 2.09856 | 1.37059 | 1.55181 | 1.38772 | 1.27866 |
| Sh3gl2        | -2.28279 | 0.03032 | 0.18125 | 0.16509 | 0.14325 | 0.14361 | 0.15321 | 0.12565 |
| Gm28729       | -2.28363 | 0.00059 | 1.5812  | 1.69136 | 0.79637 | 1.21162 | 0.88582 | 1.06681 |
| Coq8b         | -2.28558 | 0.02025 | 4.62007 | 5.27009 | 5.3784  | 4.84339 | 4.76521 | 4.45736 |
| Gnao1         | -2.28598 | 8.8E-05 | 3.04733 | 2.90246 | 2.22521 | 2.40632 | 1.9844  | 2.3691  |
| Fbxl12        | -2.28619 | 2.1E-05 | 2.40457 | 2.48905 | 1.51593 | 1.84829 | 1.9719  | 1.2643  |
| Has3          | -2.29013 | 6.7E-05 | 1.2312  | 1.1503  | 0.44127 | 0.82403 | 0.71318 | 0.59816 |
| Sntb1         | -2.29017 | 2.2E-08 | 5.41213 | 4.4967  | 2.32603 | 3.1248  | 2.58884 | 3.80796 |
| Nr4a2         | -2.29043 | 0.00566 | 2.88032 | 1.35129 | 0.6936  | 1.09071 | 1.18693 | 1.30891 |
| Hsf4          | -2.29197 | 0.01211 | 1.92783 | 1.8068  | 1.07067 | 1.19961 | 0.9161  | 1.70745 |
| Pde4dip       | -2.29239 | 2.3E-06 | 5.12579 | 2.63051 | 1.38559 | 2.59021 | 1.97679 | 2.11742 |
| Ldhb          | -2.29273 | 0.00017 | 23.5034 | 14.5647 | 11.357  | 15.1215 | 7.33063 | 17.5395 |
| Hlf           | -2.2982  | 0.0003  | 4.36113 | 2.09289 | 0.73354 | 1.90513 | 1.21187 | 1.99365 |
| Ppargc1a      | -2.29948 | 0.002   | 1.28859 | 0.42188 | 0.4429  | 0.47012 | 0.45678 | 0.70379 |
| Mill2         | -2.30005 | 1.4E-06 | 4.16826 | 3.69658 | 1.15498 | 2.74615 | 1.66023 | 2.42025 |
| Myh14         | -2.30095 | 2E-06   | 44.8462 | 40.0545 | 20.2005 | 27.202  | 21.0777 | 33.8803 |
| Bik           | -2.30224 | 0.00404 | 3.68062 | 2.45764 | 1.87976 | 1.58449 | 2.62544 | 1.90445 |
| Fbxl2         | -2.3032  | 0.0002  | 1.15097 | 0.92132 | 0.77429 | 0.97131 | 0.70768 | 0.67353 |
| Cry2          | -2.30434 | 2.2E-06 | 8.41115 | 7.08956 | 4.47113 | 4.35188 | 4.53147 | 5.68321 |
| Map9          | -2.30954 | 0.00067 | 1.12272 | 0.9959  | 1.00036 | 0.89592 | 0.65198 | 1.06562 |
| Wnt11         | -2.31435 | 0.00045 | 2.20782 | 1.73662 | 1.56269 | 1.29755 | 1.35865 | 1.79068 |
| Rassf7        | -2.31453 | 1.1E-05 | 4.24183 | 3.39268 | 2.26334 | 2.45831 | 2.7022  | 2.45527 |
| Tbx3os1       | -2.31585 | 0.0014  | 1.24014 | 0.78057 | 0.36217 | 0.59411 | 0.63385 | 0.54344 |
| Arhgef1       | -2.31647 | 0.00058 | 12.1437 | 15.9359 | 10.5458 | 11.3872 | 11.1291 | 9.36813 |
| Cyp27a1       | -2.31939 | 1.9E-05 | 2.90027 | 2.98626 | 1.48754 | 2.0119  | 1.90917 | 1.72179 |
| Trp53bp1      | -2.32127 | 0.00014 | 2.58588 | 2.19254 | 1.84043 | 2.27001 | 2.0314  | 2.0868  |
| Grhl1         | -2.32282 | 2.6E-05 | 2.27039 | 0.99324 | 0.715   | 0.98031 | 0.93679 | 1.02623 |
| Usp13         | -2.32462 | 0.00056 | 0.76926 | 0.35581 | 0.23327 | 0.30587 | 0.33461 | 0.36435 |
| Myom3         | -2.32537 | 0.04116 | 0.19665 | 0.2175  | 0.08635 | 0.17414 | 0.07757 | 0.12393 |
| Nav2          | -2.32564 | 7.4E-11 | 3.45251 | 2.85573 | 2.04308 | 2.08523 | 2.05687 | 2.50498 |
| Capsl         | -2.33144 | 0.00034 | 5.02067 | 4.40972 | 3.52715 | 3.74392 | 2.05125 | 4.50872 |
| Dgkq          | -2.33174 | 0.00021 | 2.23611 | 2.05245 | 0.98629 | 1.57036 | 1.75916 | 1.59255 |
| Rccd1         | -2.33357 | 0.00201 | 0.59398 | 0.78782 | 0.53939 | 0.56436 | 0.49448 | 0.54192 |
| Rims2         | -2.33562 | 0.04331 | 0.39822 | 0.13779 | 0.12399 | 0.12064 | 0.18565 | 0.17795 |
| Hid1          | -2.33582 | 7.9E-06 | 2.92201 | 2.94212 | 2.40539 | 2.11965 | 1.93677 | 2.70329 |
| Ehf           | -2.33602 | 4.2E-08 | 2.6045  | 2.14742 | 1.3838  | 1.56809 | 1.20002 | 2.01297 |
| Capn10        | -2.33744 | 0.00101 | 1.80742 | 2.04417 | 1.43955 | 1.57896 | 1.29331 | 1.25691 |
| B3gnt1        | -2.34768 | 0.00973 | 1.11641 | 1.09795 | 0.77062 | 0.86518 | 1.06514 | 0.61684 |
| Eml5          | -2.34864 | 3.4E-07 | 1.34267 | 0.7774  | 0.4012  | 0.58965 | 0.69976 | 0.58322 |
| Clk2          | -2.34928 | 0.00181 | 4.29195 | 4.8255  | 4.30939 | 3.55077 | 4.07869 | 3.58682 |
| Rabl2         | -2.34953 | 8.1E-05 | 3.42516 | 1.95739 | 1.90225 | 1.94437 | 1.5598  | 2.1488  |
| 2610307P16Rik | -2.35165 | 0.00037 | 0.88758 | 1.00875 | 0.79161 | 0.80665 | 0.6096  | 0.65899 |
| Hipk4         | -2.35375 | 0.03149 | 0.37577 | 0.33901 | 0.20019 | 0.15178 | 0.29364 | 0.24628 |
| Mturn         | -2.35382 | 1.8E-05 | 3.68879 | 2.71297 | 0.7873  | 1.92402 | 1.1867  | 1.94463 |
| Mrph          | -2.35411 | 0.01197 | 2.48932 | 2.40826 | 3.99023 | 2.52061 | 2.49816 | 3.1429  |
| Zscan20       | -2.35514 | 0.00118 | 0.74161 | 0.81172 | 0.51046 | 0.71364 | 0.35953 | 0.56289 |
| lyd           | -2.35546 | 0.0207  | 1.06926 | 0.66637 | 0.38548 | 0.37507 | 0.41228 | 0.8299  |
| Podnl1        | -2.3562  | 0.01059 | 0.48899 | 0.91422 | 0.44071 | 0.51457 | 0.50906 | 0.40061 |
| Colgalt2      | -2.35689 | 0.00065 | 0.98976 | 0.87352 | 0.29476 | 0.5345  | 0.4256  | 0.65222 |
| Rbm12b2       | -2.35694 | 0.00813 | 5.95222 | 5.36842 | 4.02894 | 5.36165 | 4.68856 | 4.14278 |



|               |          |         |         |         |         |         |         |         |
|---------------|----------|---------|---------|---------|---------|---------|---------|---------|
| Galnt12       | -2.35818 | 0.03057 | 0.87825 | 1.11421 | 1.50392 | 1.33028 | 0.70189 | 0.98115 |
| Trim29        | -2.35955 | 0.00251 | 0.57859 | 0.64506 | 0.36028 | 0.36649 | 0.38533 | 0.45246 |
| Zdbf2         | -2.36178 | 0.00765 | 0.20924 | 0.07933 | 0.09061 | 0.08306 | 0.05814 | 0.14187 |
| Noxo1         | -2.36186 | 0.0111  | 0.69723 | 0.66663 | 0.69214 | 0.33061 | 0.48858 | 0.4222  |
| Spire2        | -2.3627  | 0.00569 | 1.67392 | 1.20033 | 1.74478 | 1.14648 | 0.79976 | 1.10306 |
| Srsf5         | -2.36293 | 0.00047 | 58.3342 | 53.9484 | 39.0364 | 34.5388 | 44.2621 | 39.7599 |
| Etfbkm        | -2.3663  | 4.2E-05 | 4.35464 | 4.54968 | 2.5483  | 2.21714 | 2.57359 | 4.1072  |
| Gm21992       | -2.36646 | 0.00614 | 1.72246 | 1.25634 | 1.28084 | 0.95744 | 1.31974 | 1.04864 |
| Faim2         | -2.36678 | 0.00157 | 1.07099 | 0.85455 | 0.20762 | 0.6489  | 0.26647 | 0.64565 |
| D2Bwg1423e    | -2.3694  | 0.01182 | 1.2512  | 0.48842 | 0.60431 | 0.52482 | 0.35255 | 0.86735 |
| Mettl7a1      | -2.36961 | 2.3E-05 | 80.3266 | 50.9131 | 26.2478 | 43.7017 | 20.8593 | 51.502  |
| Hdac5         | -2.37333 | 2.1E-09 | 5.3575  | 5.00641 | 3.33716 | 4.02758 | 3.13227 | 3.5369  |
| Sytl3         | -2.37526 | 0.00676 | 0.40088 | 0.51751 | 0.52991 | 0.34515 | 0.37097 | 0.39757 |
| Coq8a         | -2.37704 | 0.0036  | 1.70837 | 0.68597 | 0.2364  | 0.73187 | 0.46775 | 0.65032 |
| Ankzf1        | -2.3787  | 3.9E-05 | 2.68222 | 2.88455 | 1.82505 | 1.75426 | 1.95196 | 1.58622 |
| Otud1         | -2.37931 | 9.3E-07 | 5.99887 | 3.98261 | 1.84095 | 3.41966 | 2.19737 | 2.95934 |
| Srpk3         | -2.37973 | 0.004   | 0.95143 | 0.44398 | 0.4869  | 0.61621 | 0.40859 | 0.32254 |
| Arl10         | -2.38222 | 0.00026 | 3.80353 | 3.75312 | 1.74891 | 2.59256 | 1.93503 | 2.42361 |
| Cchcr1        | -2.38408 | 0.03017 | 0.89547 | 1.26228 | 1.19265 | 0.91429 | 1.1541  | 0.70645 |
| Usp11         | -2.38812 | 0.00021 | 1.60208 | 1.79579 | 1.8069  | 1.68405 | 1.31508 | 1.26507 |
| Nr6a1         | -2.38872 | 3.4E-05 | 0.61601 | 0.75653 | 0.53947 | 0.37834 | 0.56874 | 0.54615 |
| Abcc10        | -2.38884 | 0.00011 | 1.03914 | 1.09297 | 0.83648 | 0.75874 | 0.8979  | 0.63303 |
| Dsg2          | -2.39177 | 7.1E-05 | 1.84487 | 0.79419 | 0.70624 | 1.09769 | 0.4694  | 1.15845 |
| Setd4         | -2.39291 | 0.00542 | 0.56333 | 0.54218 | 0.42134 | 0.40016 | 0.45539 | 0.31829 |
| Pigv          | -2.39294 | 1.2E-06 | 2.62213 | 1.92205 | 1.07265 | 1.5887  | 1.31265 | 1.18151 |
| Atp8a2        | -2.39365 | 0.0497  | 0.22767 | 0.12035 | 0.11371 | 0.11208 | 0.12509 | 0.09326 |
| Nos1ap        | -2.39375 | 0.00024 | 1.0458  | 0.99109 | 0.84867 | 0.73288 | 0.75692 | 0.7742  |
| Zscan26       | -2.39393 | 2.9E-05 | 8.00327 | 5.19607 | 2.76721 | 8.8245  | 6.42956 | 7.97764 |
| Safb          | -2.39553 | 0.00025 | 12.3152 | 12.9805 | 9.49698 | 9.23273 | 8.82836 | 9.74534 |
| 1700007K13Rik | -2.39671 | 0.00179 | 6.81483 | 5.28354 | 3.56576 | 4.18633 | 2.70427 | 5.04029 |
| Mapk8ip3      | -2.39733 | 7.1E-08 | 4.81219 | 4.73338 | 3.03689 | 3.55425 | 3.29557 | 2.87843 |
| Elf3          | -2.40011 | 0.00159 | 5.56183 | 6.58574 | 7.43116 | 4.36828 | 2.77674 | 4.3878  |
| Dzip1         | -2.40099 | 5.4E-09 | 2.86874 | 2.10065 | 1.56056 | 1.73812 | 1.21302 | 1.98745 |
| 4930516B21Rik | -2.40212 | 0.03429 | 1.52866 | 0.90504 | 0.34903 | 0.69464 | 0.78392 | 0.50095 |
| Tmem44        | -2.4024  | 0.00011 | 2.754   | 3.17869 | 1.09921 | 1.53687 | 1.78243 | 1.74731 |
| Speg          | -2.40315 | 0.00097 | 1.73485 | 1.21871 | 0.9657  | 1.07283 | 1.11338 | 0.7635  |
| 1600020E01Rik | -2.40414 | 0.00055 | 1.75162 | 1.60644 | 1.03597 | 1.36815 | 1.19046 | 0.70887 |
| Ptpn13        | -2.40637 | 5.7E-09 | 6.43786 | 4.83861 | 3.38611 | 3.9326  | 2.94702 | 4.22312 |
| Gtpbp2        | -2.40756 | 4E-05   | 6.88691 | 8.41687 | 4.81555 | 5.3097  | 5.41109 | 4.7394  |
| Traf1         | -2.40801 | 6.5E-06 | 2.30974 | 2.95588 | 1.46336 | 2.24202 | 1.62123 | 1.20868 |
| Cyp39a1       | -2.41033 | 9.2E-05 | 3.64991 | 1.79655 | 1.36615 | 1.74013 | 1.51229 | 1.66668 |
| Kcnq1         | -2.41281 | 6E-07   | 2.32082 | 2.35926 | 1.73234 | 2.01457 | 1.19342 | 1.73681 |
| Snx29         | -2.41311 | 0.00012 | 3.17943 | 3.43341 | 2.20372 | 2.47675 | 2.38122 | 1.89543 |
| Fam149a       | -2.41394 | 1.9E-10 | 4.21865 | 3.42534 | 2.34672 | 2.63036 | 2.18025 | 2.72722 |
| Cspp1         | -2.41536 | 9.7E-07 | 3.43866 | 2.85045 | 2.00622 | 2.17561 | 2.22933 | 1.85732 |
| Wdyhv1        | -2.41559 | 2.8E-05 | 4.14543 | 4.49953 | 3.62821 | 3.05583 | 2.68261 | 3.79239 |
| 2210011C24Rik | -2.4156  | 0.01347 | 2.00387 | 1.80418 | 0.29518 | 1.05745 | 0.80504 | 1.05915 |
| Card10        | -2.4157  | 4.2E-05 | 7.96806 | 7.92486 | 5.76946 | 5.92288 | 4.64826 | 6.55811 |
| D930048N14Rik | -2.41595 | 0.00095 | 0.77247 | 1.05886 | 0.45613 | 0.581   | 0.64396 | 0.45827 |
| Ccdc62        | -2.41673 | 0.00063 | 0.95143 | 0.56142 | 0.68201 | 0.49602 | 0.48629 | 0.47131 |
| Spef1         | -2.41961 | 1.2E-05 | 5.35324 | 5.14637 | 4.02358 | 4.10969 | 2.70381 | 3.73191 |
| Six5          | -2.42327 | 7.6E-08 | 2.39962 | 2.20939 | 1.00561 | 1.43549 | 1.17938 | 1.49309 |
| Zfp474        | -2.42499 | 0.00017 | 2.64247 | 1.87866 | 2.27342 | 1.85626 | 1.37474 | 2.10211 |
| Aasdh         | -2.42579 | 1.7E-06 | 0.95885 | 1.06902 | 0.63024 | 0.83622 | 0.55344 | 0.58321 |
| Oas1b         | -2.42683 | 0.00645 | 1.00875 | 1.82271 | 1.57035 | 1.19459 | 1.37723 | 0.90155 |
| Cacna1h       | -2.4271  | 0.01696 | 1.1133  | 0.49059 | 0.40585 | 0.37978 | 0.68538 | 0.32958 |

|               |          |         |         |         |         |         |         |         |
|---------------|----------|---------|---------|---------|---------|---------|---------|---------|
| Esrp1         | -2.42846 | 3.6E-05 | 2.83936 | 1.97265 | 1.76956 | 1.58866 | 1.32659 | 2.32616 |
| Uba7          | -2.42877 | 0.00443 | 3.39854 | 5.391   | 4.58096 | 3.80399 | 4.68953 | 2.62773 |
| Adamts10      | -2.43266 | 5.2E-07 | 16.3312 | 16.6744 | 6.42494 | 10.2399 | 9.41179 | 8.35702 |
| Nrg2          | -2.4339  | 0.00233 | 0.77078 | 0.72713 | 0.27075 | 0.467   | 0.49952 | 0.29145 |
| Pnlsr         | -2.43683 | 6.8E-07 | 10.8848 | 10.9807 | 6.69417 | 7.42609 | 7.42897 | 6.6624  |
| Efcab11       | -2.43866 | 0.0361  | 0.4856  | 0.33604 | 0.70556 | 0.37446 | 0.35575 | 0.39783 |
| 1810010H24Rik | -2.43908 | 0.00028 | 9.16086 | 5.96008 | 2.90846 | 4.86071 | 2.8592  | 5.15143 |
| Exosc7        | -2.43979 | 2.7E-05 | 4.87187 | 4.65655 | 2.66783 | 2.99978 | 2.26333 | 3.89396 |
| Taf1a         | -2.44037 | 1.9E-05 | 2.9953  | 2.72578 | 1.68808 | 1.88371 | 1.61103 | 1.98798 |
| Rps6kb2       | -2.44298 | 0.00374 | 3.32476 | 3.60192 | 3.66763 | 2.82924 | 2.98305 | 2.75444 |
| Cdkl4         | -2.44363 | 0.00013 | 2.11906 | 1.39691 | 1.20956 | 1.13285 | 1.09582 | 1.25098 |
| Strbp         | -2.44554 | 1.9E-08 | 2.69361 | 1.97528 | 1.27707 | 1.525   | 1.32633 | 1.54353 |
| Cap2          | -2.4469  | 0.00021 | 1.97962 | 0.69764 | 0.7847  | 0.86625 | 0.54385 | 1.08121 |
| Tmie          | -2.44693 | 0.00831 | 0.94467 | 0.5493  | 0.1348  | 0.42927 | 0.25952 | 0.45952 |
| Sfswap        | -2.44997 | 0.00011 | 6.6416  | 7.26145 | 5.49097 | 5.0055  | 5.33116 | 4.80824 |
| Spaca6        | -2.4531  | 0.03074 | 2.18944 | 2.01281 | 1.30407 | 1.24003 | 1.74344 | 1.01384 |
| Gpatch2       | -2.45672 | 0.00193 | 2.79338 | 2.75468 | 1.62839 | 2.29022 | 2.5689  | 1.74315 |
| Gli1          | -2.457   | 0.00017 | 1.42053 | 1.1593  | 0.65436 | 0.60398 | 0.76681 | 0.98002 |
| Igsf9         | -2.45755 | 0.00043 | 0.44205 | 0.66596 | 0.34694 | 0.43522 | 0.31372 | 0.3282  |
| Lat           | -2.45851 | 0.0224  | 1.4901  | 3.40748 | 2.33114 | 2.77535 | 1.53638 | 1.49206 |
| Myh11         | -2.45854 | 1.2E-05 | 49.2634 | 17.4026 | 13.8672 | 17.2061 | 15.9918 | 22.3065 |
| Cep112        | -2.45862 | 5.6E-06 | 1.3904  | 1.21351 | 0.87808 | 0.80657 | 0.93191 | 0.82403 |
| Snpsc4        | -2.4592  | 0.0003  | 1.93103 | 2.11153 | 1.40141 | 1.57111 | 1.61675 | 1.15261 |
| Nme5          | -2.45982 | 1.8E-05 | 5.38211 | 4.15044 | 3.97569 | 3.64457 | 2.78322 | 3.69606 |
| Ggt6          | -2.46034 | 0.03902 | 0.70337 | 0.33994 | 0.40149 | 0.21308 | 0.29445 | 0.53508 |
| Als2cl        | -2.46084 | 2.3E-06 | 9.75013 | 9.0869  | 5.03367 | 6.34014 | 6.10784 | 4.84614 |
| Neurl1a       | -2.46368 | 2.8E-06 | 1.59442 | 1.1734  | 0.75645 | 0.7653  | 0.68263 | 1.11963 |
| Sync          | -2.46407 | 0.02193 | 1.21273 | 0.37789 | 0.47363 | 0.73477 | 0.25718 | 0.36604 |
| Rgl2          | -2.46512 | 3.7E-05 | 8.70916 | 9.2034  | 6.44792 | 6.68864 | 6.26453 | 5.66273 |
| Efcab1        | -2.46563 | 0.00025 | 3.29606 | 1.51778 | 1.92321 | 1.59762 | 1.23417 | 2.22026 |
| Klc1          | -2.46702 | 2.4E-05 | 17.123  | 17.6901 | 12.2718 | 13.733  | 11.5578 | 12.8882 |
| Trim46        | -2.46961 | 0.00025 | 1.01165 | 1.34457 | 0.76994 | 0.74429 | 0.847   | 0.7104  |
| Tcea3         | -2.46966 | 2.9E-05 | 6.19791 | 4.30403 | 3.79846 | 3.71568 | 2.19858 | 4.86388 |
| Ift122        | -2.47097 | 1.5E-05 | 1.79228 | 1.34097 | 1.36405 | 1.06503 | 1.1026  | 1.2895  |
| Sgsm3         | -2.47129 | 3.3E-05 | 4.27555 | 3.29711 | 3.32578 | 2.70477 | 2.59485 | 3.17654 |
| Rab44         | -2.47242 | 0.01366 | 0.68909 | 1.10924 | 0.65979 | 0.65993 | 0.6351  | 0.56454 |
| Foxo6         | -2.47244 | 0.01917 | 0.62871 | 0.32496 | 0.31899 | 0.31744 | 0.28147 | 0.28615 |
| C030037D09Rik | -2.47251 | 0.02161 | 0.4568  | 0.31276 | 0.09933 | 0.11861 | 0.2709  | 0.23167 |
| Cckar         | -2.47275 | 0.00042 | 5.75511 | 2.97929 | 1.64252 | 2.40477 | 1.30846 | 3.59715 |
| Nrxn2         | -2.47285 | 6.8E-05 | 0.53565 | 0.34118 | 0.15854 | 0.24441 | 0.18894 | 0.2763  |
| 5430405H02Rik | -2.47514 | 0.041   | 0.71672 | 0.68197 | 1.17619 | 0.62424 | 0.52507 | 0.84407 |
| 2900052L18Rik | -2.47611 | 0.00095 | 2.47325 | 2.33507 | 1.9042  | 1.21971 | 1.72761 | 2.07335 |
| Mapk12        | -2.47664 | 3.3E-09 | 7.68802 | 5.60269 | 2.64957 | 3.72057 | 3.22346 | 4.31782 |
| Aoc3          | -2.47752 | 0.03541 | 2.41142 | 0.5684  | 0.36104 | 0.70657 | 0.59369 | 0.84205 |
| Dgat2         | -2.48143 | 0.0309  | 5.27346 | 1.05241 | 0.50732 | 1.23855 | 0.97668 | 2.06307 |
| Synpo2        | -2.48237 | 6.2E-06 | 5.13765 | 2.18149 | 1.61907 | 2.2788  | 1.95576 | 1.90803 |
| Foxa1         | -2.48241 | 9.8E-06 | 7.01936 | 3.00477 | 3.30346 | 3.02043 | 2.14089 | 4.71788 |
| Kcnmb2        | -2.48541 | 0.00034 | 1.7228  | 0.815   | 0.83337 | 0.81382 | 0.62036 | 0.98081 |
| Palmd         | -2.48569 | 4.8E-07 | 4.62681 | 3.44693 | 1.39576 | 2.57091 | 1.80894 | 1.76761 |
| Luc7l3        | -2.48789 | 1.9E-05 | 11.0187 | 11.3787 | 7.96578 | 8.16639 | 7.92515 | 6.85778 |
| Ppip5k1       | -2.48944 | 2.9E-07 | 1.78491 | 1.50964 | 1.09399 | 1.08588 | 1.07181 | 1.08474 |
| Me3           | -2.48959 | 0.01927 | 0.23734 | 0.10037 | 0.04278 | 0.06055 | 0.08236 | 0.1228  |
| Gm12992       | -2.49068 | 0.01464 | 0.48212 | 0.72345 | 0.1953  | 0.32037 | 0.41016 | 0.4332  |
| Dusp18        | -2.49152 | 4.7E-06 | 3.43108 | 2.90194 | 2.65631 | 2.16246 | 2.09465 | 2.61707 |
| Ppp1r16a      | -2.49249 | 1.1E-05 | 5.92064 | 6.4142  | 4.73386 | 4.66204 | 3.94754 | 4.46903 |
| Dmpk          | -2.49356 | 4E-05   | 8.94391 | 6.4763  | 4.79215 | 5.0611  | 5.22326 | 4.3895  |

|               |          |         |         |         |         |         |         |         |
|---------------|----------|---------|---------|---------|---------|---------|---------|---------|
| Rpgrip1l      | -2.49414 | 2.7E-07 | 2.20101 | 1.64708 | 1.31322 | 1.25673 | 1.10814 | 1.24665 |
| Dyrk1b        | -2.49438 | 2E-08   | 5.11762 | 4.70103 | 3.55955 | 3.73724 | 3.15324 | 2.97094 |
| Pm20d2        | -2.50113 | 0.02939 | 0.94625 | 0.46334 | 0.39798 | 0.33192 | 0.40133 | 0.53041 |
| Ypel4         | -2.50434 | 0.00793 | 0.62895 | 0.4433  | 0.35901 | 0.27522 | 0.38397 | 0.34351 |
| Tmem147os     | -2.50487 | 0.00432 | 2.12863 | 2.45503 | 1.10457 | 1.32878 | 0.99236 | 1.6382  |
| Igsf11        | -2.50492 | 0.00559 | 0.56921 | 0.48143 | 0.13925 | 0.32024 | 0.08936 | 0.28313 |
| Bdh1          | -2.50514 | 0.0028  | 0.79319 | 0.28461 | 0.24696 | 0.29126 | 0.21131 | 0.43322 |
| Pcp4l1        | -2.50653 | 1.6E-05 | 27.6272 | 11.7078 | 7.80218 | 10.8083 | 7.04351 | 14.5672 |
| Fbxl19        | -2.50668 | 7.8E-05 | 3.03654 | 3.96294 | 2.18093 | 2.44899 | 2.28348 | 2.02641 |
| A230050P20Rik | -2.50814 | 0.00565 | 3.12745 | 4.58944 | 4.05856 | 2.91518 | 3.85775 | 2.93447 |
| Enkur         | -2.50834 | 0.00081 | 4.38842 | 2.1775  | 2.40472 | 1.94983 | 1.28597 | 3.40349 |
| Slc23a2       | -2.5088  | 2.5E-09 | 20.8155 | 14.8654 | 11.1209 | 11.9644 | 9.13105 | 13.4675 |
| Prkcz         | -2.51295 | 4.6E-08 | 3.5419  | 2.81227 | 1.88144 | 2.20729 | 1.46154 | 2.41613 |
| Map7          | -2.51376 | 0.00043 | 3.95056 | 3.40035 | 3.04384 | 2.4697  | 2.17829 | 2.97349 |
| Hr            | -2.51616 | 3.3E-06 | 1.78213 | 1.39565 | 0.61788 | 0.96779 | 0.78335 | 0.8652  |
| Mks1          | -2.5165  | 0.00127 | 1.06154 | 1.22258 | 1.16029 | 1.01265 | 0.77768 | 0.85117 |
| Gpt           | -2.51711 | 4.8E-06 | 3.55115 | 2.82682 | 1.43083 | 1.89845 | 1.45381 | 2.13919 |
| Ubxn10        | -2.51796 | 3.5E-09 | 4.42279 | 2.8944  | 1.94195 | 2.38868 | 1.34882 | 2.902   |
| Zfp446        | -2.52156 | 0.00012 | 0.67469 | 0.67831 | 0.52317 | 0.4782  | 0.48495 | 0.39631 |
| Nek3          | -2.52622 | 0.0012  | 0.97574 | 0.71762 | 0.58117 | 0.38555 | 0.55942 | 0.66036 |
| Sytl2         | -2.52956 | 3.4E-06 | 1.39258 | 1.28964 | 0.89551 | 0.89714 | 0.76192 | 0.96036 |
| Rbm12b1       | -2.53306 | 0.00919 | 2.54528 | 3.76114 | 2.50492 | 2.46388 | 2.42191 | 2.4927  |
| Sec31b        | -2.53346 | 0.0018  | 0.62433 | 0.50849 | 0.23758 | 0.35025 | 0.35574 | 0.22733 |
| Ift172        | -2.53497 | 1.8E-07 | 5.9493  | 4.71659 | 4.19166 | 4.374   | 3.05392 | 3.75445 |
| Inafm1        | -2.5353  | 7.9E-06 | 6.43062 | 6.69034 | 4.41773 | 5.10299 | 3.62708 | 4.05615 |
| Gal3st1       | -2.54049 | 0.00043 | 1.96906 | 1.514   | 0.81741 | 1.00322 | 0.78683 | 1.20987 |
| Mok           | -2.5416  | 0.00021 | 2.36056 | 1.42933 | 1.50053 | 1.05641 | 1.39526 | 1.36252 |
| Sirt7         | -2.54629 | 4.5E-05 | 4.09848 | 4.54687 | 3.74713 | 3.18193 | 3.22348 | 2.99432 |
| Thap3         | -2.54644 | 7.4E-05 | 3.9712  | 3.47459 | 2.73576 | 2.48905 | 2.70863 | 2.01937 |
| 1810041L15Rik | -2.55033 | 0.00052 | 0.82261 | 0.31839 | 0.30242 | 0.3379  | 0.30643 | 0.33125 |
| Hdgfrp2       | -2.55285 | 0.00159 | 9.57604 | 10.9477 | 9.91297 | 7.54746 | 8.20439 | 7.84524 |
| Ccdc136       | -2.55323 | 0.00155 | 0.42149 | 0.37432 | 0.19247 | 0.29368 | 0.13895 | 0.24172 |
| Pnck          | -2.55423 | 0.04497 | 0.69511 | 0.27436 | 0.26451 | 0.28077 | 0.27159 | 0.26575 |
| Irx2          | -2.55578 | 1.4E-10 | 5.56597 | 4.5193  | 2.66874 | 2.93392 | 2.38539 | 3.67077 |
| 1700001L19Rik | -2.55584 | 0.00388 | 1.31348 | 0.81183 | 0.86508 | 0.61217 | 0.48112 | 1.03469 |
| Shh           | -2.55707 | 0.00062 | 1.82868 | 1.49239 | 1.83125 | 0.73864 | 1.01063 | 1.49816 |
| Rpgr          | -2.55785 | 1.2E-05 | 1.26035 | 0.95938 | 0.61869 | 0.64144 | 0.74789 | 0.5679  |
| Lhfpl4        | -2.55841 | 0.00755 | 0.34568 | 0.23921 | 0.21525 | 0.1904  | 0.17266 | 0.19309 |
| Adamts17      | -2.55843 | 5E-05   | 0.45881 | 0.5771  | 0.17459 | 0.29224 | 0.27579 | 0.26986 |
| Pcgf2         | -2.55843 | 6.8E-05 | 2.5904  | 3.06728 | 2.21791 | 2.13449 | 1.63203 | 2.1222  |
| Alas1         | -2.559   | 8.7E-09 | 33.1732 | 25.9512 | 19.2907 | 20.2284 | 13.9951 | 23.4323 |
| Ascc2         | -2.55938 | 1E-07   | 10.3776 | 9.15069 | 8.31819 | 7.16832 | 6.34895 | 7.58238 |
| Slc12a5       | -2.55977 | 0.00136 | 0.26983 | 0.21784 | 0.15402 | 0.17092 | 0.09884 | 0.17082 |
| Phyhd1        | -2.56584 | 0.01267 | 2.40633 | 2.52951 | 3.13952 | 2.20776 | 2.16581 | 1.97141 |
| Engase        | -2.56719 | 5E-05   | 1.07477 | 0.90902 | 0.92525 | 0.86469 | 0.52921 | 0.7939  |
| Lrrc46        | -2.56749 | 0.00252 | 1.57243 | 1.21429 | 1.24876 | 0.7456  | 0.50085 | 1.68029 |
| Ltbp4         | -2.57195 | 2.9E-05 | 59.5963 | 41.4647 | 12.8101 | 29.224  | 19.4228 | 23.9202 |
| Chkb          | -2.5742  | 0.00055 | 3.16259 | 3.44672 | 2.99971 | 2.34515 | 2.70881 | 1.89489 |
| Fam84a        | -2.57716 | 0.00092 | 2.73013 | 2.62917 | 2.53041 | 1.91618 | 1.38619 | 2.76816 |
| Grk3          | -2.57718 | 5.2E-10 | 5.60025 | 5.62526 | 3.49051 | 3.9915  | 3.12514 | 3.44318 |
| Wscd1         | -2.57799 | 0.0002  | 2.00274 | 2.5228  | 0.58375 | 1.30378 | 0.93651 | 1.16947 |
| Inha          | -2.58252 | 0.04358 | 0.68116 | 0.52374 | 0.56554 | 0.33767 | 0.68047 | 0.15219 |
| Dmd           | -2.58316 | 2.9E-07 | 2.87816 | 1.334   | 0.80172 | 1.0556  | 1.00085 | 1.21985 |
| Gm11992       | -2.58454 | 0.00142 | 1.44618 | 0.5472  | 0.43446 | 0.43811 | 0.55761 | 0.68593 |
| Gmpr          | -2.58898 | 1.2E-05 | 2.53851 | 1.56898 | 0.89169 | 1.0648  | 0.96561 | 1.3598  |
| Nthl1         | -2.59179 | 0.00809 | 2.02972 | 1.00141 | 1.06202 | 0.56365 | 1.11522 | 1.10858 |



|               |          |         |         |         |         |         |         |         |
|---------------|----------|---------|---------|---------|---------|---------|---------|---------|
| Pdlim3        | -2.59267 | 9.1E-06 | 1.95204 | 0.8255  | 0.76983 | 0.92466 | 0.68902 | 0.77053 |
| Tyro3         | -2.59356 | 1.1E-05 | 1.72418 | 1.14669 | 1.24493 | 0.88394 | 0.96084 | 1.13487 |
| Pacrg         | -2.59467 | 0.00055 | 2.49842 | 1.47427 | 1.72459 | 1.76017 | 0.80875 | 1.42803 |
| Thnsl1        | -2.59485 | 2E-06   | 1.53622 | 1.71968 | 0.79951 | 1.08134 | 0.67857 | 1.05497 |
| Trmu          | -2.59514 | 6.7E-08 | 2.20644 | 1.6329  | 0.94458 | 1.04441 | 1.26283 | 0.90382 |
| Wnk4          | -2.59525 | 0.00019 | 1.2331  | 1.32229 | 1.18148 | 0.73377 | 0.64526 | 1.19062 |
| Arhgef4       | -2.59536 | 0.00137 | 0.72604 | 0.65447 | 0.69798 | 0.54408 | 0.5109  | 0.50089 |
| Gm12473       | -2.59549 | 0.02165 | 2.68176 | 2.40161 | 0.54027 | 1.43367 | 1.15567 | 1.29238 |
| Xrra1         | -2.59569 | 0.02327 | 0.33229 | 0.19322 | 0.23709 | 0.10066 | 0.213   | 0.20417 |
| Lrig1         | -2.59792 | 6.8E-06 | 3.48342 | 3.1537  | 2.8565  | 2.45735 | 1.86902 | 2.77343 |
| Zscan18       | -2.60049 | 0.0043  | 0.3001  | 0.32634 | 0.36707 | 0.25975 | 0.20415 | 0.2283  |
| Dgkb          | -2.60166 | 0.00339 | 0.54368 | 0.20901 | 0.16927 | 0.22958 | 0.20518 | 0.16197 |
| Dnase1l2      | -2.607   | 0.00606 | 0.78469 | 0.63049 | 0.22395 | 0.4992  | 0.25869 | 0.32143 |
| Ankrd24       | -2.61033 | 1.6E-05 | 0.61699 | 0.56928 | 0.26894 | 0.37383 | 0.27942 | 0.33086 |
| U2af1l4_2     | -2.61127 | 0.01043 | 2.51362 | 2.22153 | 0.8383  | 1.40317 | 1.59317 | 0.55532 |
| Tmem212       | -2.6118  | 1.2E-06 | 16.2009 | 11.8683 | 7.57279 | 6.80155 | 5.60726 | 12.4367 |
| Tekt1         | -2.61343 | 2.2E-07 | 4.73018 | 2.9529  | 2.57143 | 2.49063 | 2.02143 | 2.49122 |
| Smim22        | -2.61351 | 0.00101 | 3.25624 | 6.74748 | 2.60214 | 3.25529 | 2.26623 | 3.33462 |
| Snrnp70       | -2.61564 | 4.4E-05 | 25.6466 | 27.303  | 18.8973 | 15.5592 | 19.9605 | 15.9067 |
| Cbx7          | -2.61614 | 1.6E-12 | 6.25156 | 5.10883 | 3.0219  | 3.60856 | 2.93977 | 3.31061 |
| Lrrc4b        | -2.61654 | 0.04562 | 0.56131 | 0.211   | 0.2492  | 0.15115 | 0.13707 | 0.40876 |
| Pcyt2         | -2.61685 | 3.7E-06 | 3.36264 | 3.78615 | 2.66317 | 2.3939  | 2.44805 | 2.27276 |
| Spice1        | -2.62444 | 1.9E-06 | 1.82136 | 1.48342 | 1.30917 | 1.46115 | 0.70422 | 1.13293 |
| Banp          | -2.62475 | 0.00044 | 1.94189 | 2.10835 | 0.86474 | 1.46026 | 0.82734 | 0.74468 |
| Gm14443       | -2.63004 | 0.00526 | 0.37595 | 0.28618 | 0.27897 | 0.27334 | 0.15148 | 0.2464  |
| A530020G20Rik | -2.63354 | 0.00016 | 2.49345 | 2.21129 | 1.38181 | 1.11472 | 1.48972 | 0.93214 |
| Rfx2          | -2.63419 | 2E-08   | 3.40507 | 2.78779 | 1.80368 | 1.93104 | 1.49672 | 2.05316 |
| Enah          | -2.63651 | 7.8E-09 | 5.31249 | 3.22633 | 2.75119 | 2.66212 | 2.15566 | 3.08697 |
| Camkk1        | -2.64118 | 5E-06   | 1.86203 | 1.47126 | 0.923   | 0.92035 | 0.82565 | 1.14411 |
| Wnt3a         | -2.64285 | 0.00091 | 1.12477 | 1.34302 | 0.33989 | 1.10239 | 0.38776 | 0.32523 |
| Ppox          | -2.64293 | 0.0002  | 3.15585 | 3.31934 | 2.74824 | 2.50041 | 2.5639  | 1.78993 |
| Krtcap3       | -2.64523 | 6.5E-05 | 3.68627 | 4.67668 | 3.35103 | 2.60569 | 2.60052 | 3.13185 |
| Kcnmb4        | -2.6461  | 0.01505 | 0.74191 | 0.32537 | 0.21958 | 0.24973 | 0.32209 | 0.31516 |
| Fam166b       | -2.6483  | 0.00111 | 1.7604  | 2.11884 | 1.7005  | 0.94353 | 1.19045 | 1.83051 |
| Dennd1c       | -2.64957 | 0.01987 | 1.66727 | 3.73997 | 3.02056 | 2.63523 | 2.23044 | 1.60348 |
| Pgr           | -2.651   | 0.00034 | 0.32063 | 0.27119 | 0.12201 | 0.19427 | 0.13311 | 0.1401  |
| Hspa4l        | -2.6559  | 1.2E-09 | 7.62179 | 6.42673 | 3.02416 | 4.60383 | 2.89398 | 3.84552 |
| BC039771      | -2.65677 | 1.8E-05 | 2.26745 | 1.40964 | 0.68585 | 0.70452 | 1.27778 | 0.77798 |
| Hgfac         | -2.66318 | 0.00599 | 0.66963 | 1.06476 | 0.36694 | 0.50309 | 0.66717 | 0.1975  |
| Sh2d4b        | -2.66395 | 0.00157 | 0.45363 | 0.67142 | 0.3884  | 0.32981 | 0.4154  | 0.27873 |
| Wdr90         | -2.6653  | 9.2E-05 | 1.90961 | 1.73374 | 1.68736 | 1.17661 | 1.27251 | 0.96342 |
| Grlh2         | -2.66626 | 1.5E-07 | 2.53808 | 2.51145 | 2.04528 | 1.86945 | 1.30035 | 1.82112 |
| Rhov          | -2.66657 | 0.02033 | 0.69723 | 0.45362 | 0.4286  | 0.35745 | 0.27504 | 0.39546 |
| Odf2l         | -2.66877 | 1.3E-05 | 1.47282 | 1.46608 | 1.40977 | 1.04337 | 1.10388 | 1.00242 |
| Ptprz1        | -2.66893 | 9.2E-07 | 1.82426 | 0.82056 | 0.64371 | 0.70337 | 0.71682 | 0.70651 |
| Ccm2l         | -2.67025 | 0.00042 | 9.25898 | 10.5912 | 8.49074 | 6.48352 | 7.06106 | 7.05699 |
| 1700020L24Rik | -2.67295 | 0.00088 | 2.69663 | 2.50149 | 1.09237 | 1.68655 | 1.52945 | 1.14025 |
| Adrb1         | -2.67359 | 5E-06   | 9.4601  | 9.02459 | 5.52543 | 6.53148 | 4.67399 | 5.28699 |
| Nat9          | -2.67441 | 7E-06   | 2.82943 | 2.95396 | 2.57398 | 2.22324 | 1.78133 | 1.99206 |
| Gm17018       | -2.67571 | 0.00021 | 4.99037 | 3.87227 | 4.44264 | 3.52289 | 2.28075 | 4.01338 |
| Fsd1l         | -2.67686 | 4E-08   | 2.70102 | 1.33261 | 0.95289 | 1.17055 | 0.9138  | 1.1602  |
| Cntrob        | -2.67962 | 0.00532 | 0.64457 | 0.74236 | 0.93938 | 0.53179 | 0.79372 | 0.40448 |
| Wdr34         | -2.68117 | 0.00019 | 2.86519 | 2.22684 | 2.07747 | 1.73597 | 1.24807 | 2.06184 |
| Shroom1       | -2.68222 | 0.00738 | 0.37726 | 0.35267 | 0.31735 | 0.25264 | 0.17456 | 0.21147 |
| Efcc1         | -2.68284 | 7.9E-06 | 1.28454 | 1.18174 | 0.3859  | 0.81924 | 0.46227 | 0.60927 |
| 2210408F21Rik | -2.68696 | 0.00044 | 2.10398 | 1.30846 | 0.98902 | 0.78736 | 0.77068 | 1.36882 |

|               |          |         |         |         |         |         |         |         |
|---------------|----------|---------|---------|---------|---------|---------|---------|---------|
| Adam22        | -2.69329 | 2.9E-09 | 1.18737 | 0.89056 | 0.65644 | 0.58367 | 0.53067 | 0.73416 |
| Stk33         | -2.69413 | 1.4E-06 | 2.85645 | 2.24129 | 1.37509 | 1.52216 | 1.2354  | 1.55071 |
| Gas8          | -2.6958  | 0.00103 | 3.98407 | 3.61997 | 3.63859 | 2.04145 | 2.3016  | 2.33141 |
| Leng8         | -2.69589 | 5.7E-06 | 27.1799 | 27.0713 | 16.7617 | 14.2871 | 19.9537 | 13.9829 |
| Mns1          | -2.69799 | 3.2E-06 | 2.63981 | 1.91581 | 1.32211 | 1.32081 | 1.04805 | 1.54876 |
| Naaladl2      | -2.70187 | 9.1E-07 | 0.851   | 0.39327 | 0.33051 | 0.3774  | 0.23138 | 0.41687 |
| Zfp467        | -2.70231 | 3.2E-11 | 3.75654 | 2.94119 | 2.08298 | 2.4581  | 1.43105 | 2.00482 |
| Celf3         | -2.70256 | 0.0002  | 0.61748 | 0.35288 | 0.30483 | 0.23256 | 0.26897 | 0.32814 |
| Sstr4         | -2.70503 | 0.00043 | 2.6298  | 2.22424 | 0.51257 | 1.12701 | 1.08076 | 1.20861 |
| Sema4f        | -2.70701 | 0.00011 | 1.57121 | 2.23431 | 0.80815 | 1.01474 | 0.86013 | 1.18821 |
| Fhod3         | -2.70952 | 0.03961 | 0.96269 | 0.24284 | 0.07712 | 0.27629 | 0.30933 | 0.19371 |
| Il22ra1       | -2.71253 | 0.00657 | 0.53331 | 0.54127 | 0.64941 | 0.43083 | 0.23442 | 0.5243  |
| Ankrd63       | -2.71346 | 0.03101 | 1.14618 | 1.2237  | 0.23596 | 0.38707 | 0.19271 | 1.09295 |
| Casq1         | -2.71411 | 0.03422 | 0.84268 | 0.27717 | 0.26723 | 0.31201 | 0.34297 | 0.19177 |
| Slc22a17      | -2.71495 | 0.00016 | 1.91116 | 1.88583 | 1.90907 | 1.20619 | 1.51678 | 1.23954 |
| Cntnap1       | -2.71543 | 0.0001  | 0.65297 | 0.47337 | 0.40821 | 0.35794 | 0.27335 | 0.36937 |
| Lmod1         | -2.71735 | 7.7E-06 | 4.44195 | 1.9176  | 1.79596 | 1.90634 | 1.49148 | 1.91432 |
| Gria1         | -2.71845 | 0.01442 | 1.63238 | 0.65197 | 0.22431 | 0.40294 | 0.31004 | 0.7925  |
| Tnxb          | -2.72072 | 5E-08   | 15.9873 | 11.4717 | 4.85103 | 6.74014 | 5.12441 | 8.65414 |
| Klf15         | -2.72639 | 0.00764 | 12.0431 | 6.034   | 2.98879 | 3.39058 | 3.71607 | 5.81794 |
| Spata24       | -2.72656 | 0.00361 | 2.45582 | 3.19552 | 4.42102 | 2.63251 | 2.1451  | 2.78577 |
| Sorbs2        | -2.72681 | 4.1E-05 | 1.3018  | 0.48494 | 0.5687  | 0.41857 | 0.42004 | 0.45433 |
| Fam81a        | -2.72848 | 0.00015 | 1.39177 | 0.9136  | 0.90114 | 0.71739 | 0.51741 | 0.95302 |
| Rspo1         | -2.72927 | 0.00567 | 0.98973 | 1.39516 | 0.53804 | 0.8281  | 0.65601 | 0.3475  |
| Cep89         | -2.73025 | 1.5E-05 | 1.9212  | 2.32348 | 1.84479 | 1.46862 | 1.40746 | 1.39743 |
| Lca5          | -2.73136 | 1.8E-07 | 1.88295 | 1.83758 | 1.35589 | 1.23738 | 1.09294 | 1.0917  |
| B230369F24Rik | -2.7332  | 0.02148 | 0.74925 | 0.33194 | 0.12219 | 0.36749 | 0.18297 | 0.17538 |
| Gm16136       | -2.73654 | 0.00206 | 2.11502 | 1.52383 | 1.60968 | 1.13907 | 0.63126 | 1.79692 |
| Fsip1         | -2.73858 | 0.00373 | 1.43365 | 0.7823  | 1.10871 | 0.98071 | 0.74536 | 0.45466 |
| Tctn2         | -2.75009 | 3.9E-06 | 1.10905 | 1.06804 | 0.94017 | 0.7651  | 0.57115 | 0.82763 |
| Tox3          | -2.75384 | 0.00023 | 1.82349 | 0.80566 | 0.37284 | 0.84098 | 0.45858 | 0.51283 |
| Klhl3         | -2.75478 | 0.02623 | 0.93286 | 0.48732 | 0.90834 | 0.46546 | 0.7035  | 0.44956 |
| Rnf43         | -2.75814 | 9.9E-08 | 1.04457 | 1.08374 | 0.79499 | 0.81854 | 0.41834 | 0.73026 |
| Vars2         | -2.7626  | 9.4E-05 | 2.6431  | 3.1976  | 2.08161 | 1.87507 | 1.78926 | 2.11056 |
| Dync2h1       | -2.76371 | 7.7E-10 | 4.21266 | 3.23221 | 2.63421 | 2.28834 | 2.03425 | 2.52207 |
| Bbs9          | -2.76612 | 4.6E-08 | 3.24795 | 2.68519 | 1.93745 | 2.1097  | 1.72562 | 1.34244 |
| Hsph1         | -2.76852 | 0.00236 | 8.77424 | 10.9403 | 2.3822  | 6.72517 | 3.02979 | 3.69716 |
| Stox1         | -2.7705  | 0.00074 | 0.59568 | 0.62977 | 0.62336 | 0.37595 | 0.34548 | 0.52868 |
| Crebzf        | -2.77505 | 0.0003  | 10.3942 | 9.86468 | 10.567  | 8.24662 | 7.34219 | 7.17096 |
| Gm16576       | -2.77708 | 0.0006  | 0.55776 | 0.51463 | 0.15436 | 0.24577 | 0.28479 | 0.2354  |
| 4833427G06Rik | -2.78062 | 0.00295 | 4.13037 | 3.57279 | 2.89345 | 1.53564 | 1.51294 | 1.92263 |
| Ppp1r36       | -2.78124 | 0.0003  | 2.99154 | 1.56119 | 1.81658 | 1.65827 | 0.88596 | 1.61651 |
| Tcea2         | -2.78214 | 0.00066 | 1.18225 | 1.08564 | 0.77124 | 0.61398 | 0.66814 | 0.69184 |
| Pifo          | -2.78261 | 0.00046 | 5.26792 | 3.35877 | 2.5906  | 2.25877 | 1.18746 | 3.9174  |
| Prodh         | -2.78283 | 1.1E-08 | 2.69183 | 1.87493 | 1.47625 | 1.18323 | 1.17934 | 1.55668 |
| 1700010I14Rik | -2.78383 | 0.02264 | 0.38666 | 0.47238 | 0.34332 | 0.20824 | 0.25179 | 0.31677 |
| Apob          | -2.78546 | 0.01333 | 0.10488 | 0.09425 | 0.02993 | 0.04766 | 0.04322 | 0.0537  |
| Gm12185       | -2.78731 | 0.01736 | 0.21253 | 0.73283 | 0.59722 | 0.45564 | 0.26349 | 0.28126 |
| Rph3al        | -2.79016 | 3.6E-08 | 1.84399 | 2.16726 | 1.03889 | 1.08822 | 0.96493 | 1.21641 |
| Sirt3         | -2.79189 | 6.2E-05 | 1.56072 | 1.50003 | 1.49827 | 1.09605 | 0.93549 | 1.36581 |
| Gm26615       | -2.79264 | 0.00176 | 0.62775 | 0.50681 | 0.29317 | 0.25932 | 0.37627 | 0.25714 |
| Clcn2         | -2.79474 | 7.7E-06 | 0.53086 | 0.64141 | 0.38093 | 0.32164 | 0.35557 | 0.32307 |
| Ciart         | -2.79601 | 0.0284  | 5.69598 | 4.30505 | 1.56799 | 1.83569 | 1.71648 | 1.68787 |
| Fads6         | -2.7977  | 0.00011 | 0.45305 | 0.37157 | 0.3448  | 0.2329  | 0.28161 | 0.24744 |
| Dennd6b       | -2.7983  | 0.00027 | 1.03094 | 0.72104 | 0.679   | 0.68469 | 0.49383 | 0.38982 |
| Gm5148        | -2.80373 | 0.01706 | 0.35121 | 0.31685 | 0.21384 | 0.1986  | 0.12007 | 0.19182 |

|               |          |         |         |         |         |         |         |         |
|---------------|----------|---------|---------|---------|---------|---------|---------|---------|
| Acacb         | -2.80906 | 6.1E-06 | 2.40861 | 1.37148 | 0.90934 | 0.92501 | 1.02815 | 0.94002 |
| Sgsm1         | -2.81041 | 0.00597 | 0.64839 | 0.55875 | 0.51675 | 0.37802 | 0.33161 | 0.46104 |
| Hcar2         | -2.81363 | 0.00014 | 1.27778 | 0.92062 | 0.54027 | 0.65949 | 0.41604 | 0.62034 |
| Rsph1         | -2.81568 | 2.5E-06 | 13.8105 | 7.43316 | 7.70391 | 6.13302 | 3.96651 | 9.1929  |
| Vsig2         | -2.81731 | 2.7E-06 | 4.70765 | 4.9185  | 2.42369 | 2.18116 | 3.07686 | 2.3065  |
| Panct2        | -2.82581 | 0.00454 | 0.5764  | 0.33751 | 0.40494 | 0.25521 | 0.22738 | 0.34508 |
| Abhd3         | -2.82713 | 0.00013 | 1.3966  | 0.86623 | 0.74404 | 0.81797 | 0.47746 | 0.53395 |
| Syne1         | -2.8284  | 1.9E-13 | 18.4061 | 14.033  | 7.88982 | 8.6607  | 7.90943 | 8.67073 |
| Ccdc9         | -2.8287  | 0.00203 | 5.53963 | 6.18631 | 6.55129 | 3.86887 | 4.70228 | 4.57914 |
| Kif21a        | -2.83128 | 2.8E-11 | 7.50449 | 4.52176 | 3.68775 | 3.33321 | 2.70753 | 4.10259 |
| Fam193b       | -2.83379 | 2.3E-09 | 10.1907 | 10.5068 | 4.9035  | 5.82995 | 5.52212 | 4.6229  |
| Rab11fip4     | -2.8358  | 4.6E-07 | 2.30459 | 1.67961 | 1.66532 | 1.29233 | 0.94295 | 1.58676 |
| Fam129c       | -2.83588 | 0.04862 | 0.25657 | 0.7595  | 0.35148 | 0.32644 | 0.35712 | 0.18917 |
| Nr4a1         | -2.837   | 0.00235 | 20.1947 | 12.8024 | 3.83537 | 8.11979 | 7.546   | 4.96037 |
| Sord          | -2.83838 | 6.9E-09 | 10.99   | 9.0981  | 6.6943  | 5.83515 | 4.69417 | 6.61752 |
| Fam83f        | -2.83862 | 0.00238 | 0.45852 | 0.43952 | 0.27917 | 0.33337 | 0.22394 | 0.15026 |
| Gpr179        | -2.8391  | 0.00055 | 0.21059 | 0.22669 | 0.15299 | 0.08699 | 0.15428 | 0.13332 |
| Tmod1         | -2.84387 | 1.2E-10 | 6.52742 | 4.34614 | 2.61604 | 3.18351 | 3.20492 | 3.48924 |
| 5330417C22Rik | -2.8506  | 3.2E-07 | 9.72201 | 5.40419 | 3.44043 | 4.07324 | 2.48377 | 5.08039 |
| 4930481A15Rik | -2.85156 | 0.00067 | 1.5087  | 0.68975 | 0.5586  | 0.41999 | 0.7468  | 0.46768 |
| Agbl5         | -2.85231 | 6.9E-09 | 2.17563 | 2.09203 | 1.4784  | 1.43587 | 1.15744 | 1.13522 |
| Cuedc1        | -2.85246 | 3.6E-05 | 4.72572 | 4.10387 | 3.48233 | 2.66214 | 2.85994 | 2.65443 |
| Pih1d2        | -2.85253 | 6.1E-06 | 1.52608 | 1.23581 | 1.1491  | 0.88528 | 0.66604 | 0.95764 |
| Arhgef28      | -2.85516 | 1.3E-08 | 5.28267 | 4.45564 | 3.63176 | 3.18299 | 2.5337  | 3.14427 |
| Hepacam       | -2.85625 | 0.00705 | 0.35476 | 0.36929 | 0.18692 | 0.19841 | 0.21991 | 0.13414 |
| Pir           | -2.85655 | 4.3E-08 | 3.01004 | 1.57202 | 1.35198 | 1.30551 | 1.00014 | 1.41492 |
| Acvr2b        | -2.85751 | 2.2E-10 | 2.74385 | 2.4977  | 1.2211  | 1.39477 | 1.14134 | 1.48591 |
| Magi2         | -2.86035 | 0.00061 | 0.46667 | 0.45896 | 0.29735 | 0.37481 | 0.24647 | 0.33787 |
| Nov           | -2.86224 | 0.00017 | 3.85216 | 1.13091 | 0.9086  | 1.40809 | 0.76965 | 1.27801 |
| Dhx16         | -2.86227 | 6.4E-06 | 8.41091 | 10.0952 | 7.02954 | 5.48803 | 5.86758 | 5.66609 |
| Acbd4         | -2.86454 | 9.9E-08 | 3.48308 | 3.39308 | 2.13016 | 2.22339 | 1.70872 | 1.78346 |
| Cep128        | -2.86625 | 0.00016 | 1.56025 | 1.8928  | 1.7542  | 1.22702 | 1.42013 | 0.93609 |
| Rasgrp2       | -2.86694 | 7.1E-10 | 3.56234 | 3.71163 | 1.66713 | 2.19858 | 1.71282 | 2.10275 |
| Mdm1          | -2.86707 | 1.7E-06 | 2.2044  | 1.54553 | 1.49007 | 1.08957 | 0.89246 | 1.402   |
| Phf21b        | -2.86905 | 0.00423 | 0.5141  | 0.16305 | 0.26899 | 0.14276 | 0.17262 | 0.26323 |
| Tlr12         | -2.87106 | 0.0067  | 0.37375 | 0.77811 | 0.26257 | 0.31354 | 0.23168 | 0.3533  |
| Ttc12         | -2.87547 | 6.4E-08 | 2.85367 | 2.37959 | 1.97301 | 1.522   | 1.36918 | 1.79458 |
| Phf1          | -2.87756 | 4E-07   | 11.5065 | 10.9724 | 6.43916 | 6.26532 | 5.39934 | 6.71581 |
| Platr21       | -2.87889 | 0.02934 | 0.31644 | 0.30587 | 0.20643 | 0.08217 | 0.23182 | 0.20369 |
| 2810029C07Rik | -2.88329 | 0.04512 | 0.42156 | 0.27731 | 0.42778 | 0.1419  | 0.34315 | 0.19187 |
| Meg3          | -2.88462 | 0.00072 | 1.13105 | 0.70039 | 0.51879 | 0.4589  | 0.73612 | 0.2813  |
| 9330162012Rik | -2.8856  | 0.03174 | 0.09524 | 0.22152 | 0.32619 | 0.10099 | 0.10466 | 0.17556 |
| Pbx4          | -2.89065 | 0.00469 | 0.53558 | 0.55752 | 0.51736 | 0.3245  | 0.36218 | 0.30377 |
| Ccdc96        | -2.89713 | 7.2E-05 | 1.47771 | 0.96969 | 1.33793 | 0.87988 | 0.59727 | 1.04364 |
| Gm281         | -2.90099 | 3E-05   | 2.93939 | 1.2823  | 1.94273 | 1.42474 | 1.29203 | 1.21673 |
| Homer2        | -2.90308 | 5.9E-05 | 0.45593 | 0.30604 | 0.19828 | 0.17539 | 0.17496 | 0.24309 |
| Mcf2l         | -2.90309 | 1.4E-09 | 7.28696 | 6.38719 | 4.0777  | 3.07925 | 3.51872 | 4.58591 |
| Erich2        | -2.90619 | 0.00084 | 2.29273 | 2.25361 | 2.44055 | 1.44544 | 0.81712 | 1.77681 |
| 2410004P03Rik | -2.90716 | 8.8E-06 | 4.13175 | 3.0359  | 3.09542 | 2.28431 | 1.58912 | 2.96185 |
| Slc9a2        | -2.90784 | 0.00097 | 0.37927 | 0.12167 | 0.13437 | 0.11886 | 0.11497 | 0.13929 |
| Saxo2         | -2.91011 | 1.1E-06 | 2.76838 | 1.5825  | 1.37314 | 1.28401 | 0.90915 | 1.37645 |
| Col8a2        | -2.91141 | 5.8E-06 | 3.17413 | 2.32323 | 2.20668 | 1.61495 | 1.44589 | 1.95032 |
| 4930547M16Rik | -2.91725 | 0.0449  | 0.19029 | 0.32188 | 0.26068 | 0.06917 | 0.22304 | 0.18707 |
| Mapk1ip1      | -2.91815 | 1.9E-06 | 4.26856 | 4.88208 | 3.76551 | 3.11525 | 2.52302 | 2.66253 |
| Fam198a       | -2.91822 | 3.3E-05 | 0.89662 | 1.27722 | 0.5926  | 0.65762 | 0.29386 | 0.71523 |
| Safb2         | -2.92065 | 7.3E-05 | 10.1349 | 11.4955 | 9.29695 | 6.50658 | 7.12158 | 6.0578  |



|               |          |         |         |         |         |         |         |         |
|---------------|----------|---------|---------|---------|---------|---------|---------|---------|
| 2610028H24Rik | -2.92215 | 1.3E-05 | 8.62484 | 7.1135  | 7.46107 | 5.09581 | 3.13963 | 6.45153 |
| Kif9          | -2.92522 | 2.2E-09 | 2.29513 | 1.68954 | 1.35859 | 1.17169 | 0.80956 | 1.35799 |
| Tlr11         | -2.93081 | 0.04131 | 0.16739 | 0.40112 | 0.25479 | 0.25354 | 0.12263 | 0.13713 |
| Gbp8          | -2.93108 | 0.01754 | 0.61016 | 1.54818 | 1.84739 | 1.02868 | 1.10777 | 0.58681 |
| Grtp1         | -2.93288 | 1.9E-08 | 2.23156 | 2.45363 | 0.81522 | 1.02757 | 1.17707 | 1.27975 |
| Ift81         | -2.93697 | 1.7E-07 | 5.13692 | 4.36689 | 4.30849 | 2.84242 | 2.59205 | 3.71461 |
| 2810001G20Rik | -2.93701 | 0.00277 | 1.64183 | 1.90023 | 1.47973 | 0.99476 | 1.01288 | 1.1327  |
| 2810410L24Rik | -2.93932 | 0.01927 | 0.60329 | 0.43371 | 0.41323 | 0.34724 | 0.33147 | 0.1977  |
| Ptpu          | -2.9408  | 5.1E-09 | 5.14922 | 5.53893 | 3.50357 | 2.51297 | 2.98208 | 3.50317 |
| Klhl17        | -2.94091 | 1.1E-06 | 4.84871 | 4.22911 | 2.94064 | 2.60725 | 2.44209 | 2.43306 |
| Zap70         | -2.94345 | 0.0014  | 0.79371 | 2.14301 | 1.35915 | 1.18374 | 0.69329 | 1.0254  |
| Col11a2       | -2.94459 | 0.00236 | 0.36102 | 0.55414 | 0.29002 | 0.25114 | 0.30366 | 0.18622 |
| Plin5         | -2.94737 | 0.0001  | 1.92566 | 1.14749 | 0.84936 | 0.74246 | 0.70536 | 0.89637 |
| Fam89a        | -2.94835 | 0.00022 | 1.57008 | 1.50116 | 1.40276 | 0.78584 | 1.20024 | 0.72704 |
| Sphkap        | -2.94985 | 0.01121 | 0.17122 | 0.08045 | 0.07602 | 0.04611 | 0.06272 | 0.08572 |
| Pcnt          | -2.95055 | 3.4E-08 | 11.8557 | 13.6184 | 8.78594 | 7.36316 | 7.57602 | 7.80482 |
| Fcamr         | -2.95125 | 0.01401 | 0.66914 | 1.21274 | 0.87302 | 0.57917 | 0.49021 | 0.46988 |
| Celsr1        | -2.95257 | 1.3E-08 | 5.94314 | 4.69802 | 4.57662 | 3.5708  | 2.59781 | 3.92767 |
| 1700016K19Rik | -2.95379 | 2.2E-05 | 11.2065 | 5.11657 | 6.34007 | 4.80694 | 2.76081 | 6.82479 |
| Tll8          | -2.95791 | 0.00556 | 0.45296 | 0.42817 | 0.21292 | 0.19372 | 0.37087 | 0.06549 |
| Ovol2         | -2.95879 | 0.004   | 0.6484  | 0.69464 | 0.49348 | 0.2619  | 0.38001 | 0.28331 |
| Sfi1          | -2.9608  | 2.4E-10 | 6.50081 | 5.87641 | 3.87621 | 3.79231 | 3.60282 | 2.62332 |
| Syt5          | -2.96155 | 7.7E-06 | 3.07017 | 1.39572 | 1.05148 | 1.20911 | 0.9559  | 1.03754 |
| Mblac2        | -2.96308 | 3.6E-07 | 1.20026 | 0.93554 | 0.45674 | 0.55611 | 0.60344 | 0.34706 |
| Thbs3         | -2.96696 | 6.3E-12 | 4.6966  | 5.38183 | 2.85379 | 2.46694 | 2.46954 | 2.24968 |
| Ppara         | -2.96811 | 0.00033 | 1.07148 | 0.48333 | 0.24464 | 0.36066 | 0.29654 | 0.37063 |
| Osbpl10       | -2.97011 | 1.2E-05 | 1.01308 | 1.02221 | 0.99422 | 0.5815  | 0.63801 | 0.72805 |
| Adcy5         | -2.97203 | 2.7E-10 | 5.05765 | 2.57984 | 2.09823 | 1.8007  | 1.74756 | 2.27466 |
| Slc25a27      | -2.97256 | 0.00012 | 1.05376 | 1.03501 | 0.42686 | 0.55608 | 0.57276 | 0.33418 |
| Plch1         | -2.97275 | 8.6E-06 | 1.14212 | 0.84076 | 0.70021 | 0.53821 | 0.48808 | 0.64112 |
| Gm45151       | -2.97457 | 0.01391 | 1.15455 | 1.085   | 1.17159 | 0.6218  | 0.56388 | 0.84077 |
| Fhl2          | -2.976   | 0.01276 | 4.04447 | 1.0588  | 0.9894  | 1.25441 | 1.12874 | 0.98615 |
| Gm42742       | -2.97718 | 0.00102 | 3.3431  | 3.99283 | 2.38242 | 1.66953 | 2.33039 | 2.30728 |
| Ccdc65        | -2.98656 | 1.1E-06 | 2.46467 | 1.92108 | 1.71027 | 1.37618 | 0.77889 | 1.58368 |
| Ebf4          | -2.98689 | 0.00059 | 0.53628 | 0.5252  | 0.48333 | 0.35913 | 0.26881 | 0.30061 |
| Tchp          | -2.9883  | 0.00052 | 1.9923  | 2.4674  | 2.38273 | 1.32206 | 1.54643 | 1.53505 |
| Reep6         | -2.98994 | 3.6E-06 | 4.41015 | 1.97291 | 1.33148 | 1.65622 | 0.96124 | 1.85131 |
| Dnah8         | -2.99876 | 0.00122 | 0.3069  | 0.55093 | 0.37896 | 0.34153 | 0.29366 | 0.15394 |
| Gm9899        | -2.99954 | 0.001   | 0.56814 | 0.2723  | 0.12972 | 0.19506 | 0.18036 | 0.15515 |
| Ctxn1         | -2.99961 | 1.6E-05 | 7.5361  | 4.52547 | 5.07592 | 4.01807 | 2.20836 | 4.6305  |
| Lrrc9         | -3.00204 | 0.00255 | 0.41353 | 0.15796 | 0.2132  | 0.17781 | 0.1075  | 0.17486 |
| Armc4         | -3.00394 | 2.9E-06 | 1.89137 | 1.17755 | 1.01962 | 0.98679 | 0.63507 | 0.8178  |
| Dnaja4        | -3.00738 | 3.7E-07 | 7.5839  | 7.64123 | 3.74785 | 4.34824 | 3.03897 | 4.96219 |
| Cep164        | -3.00744 | 1.1E-05 | 3.58366 | 4.15072 | 3.62208 | 2.43404 | 2.43306 | 2.60868 |
| Clic6         | -3.00988 | 9.7E-08 | 8.28432 | 5.25012 | 5.94086 | 4.15685 | 3.38499 | 4.98987 |
| 2310034G01Rik | -3.01182 | 0.04522 | 2.86054 | 1.85674 | 1.367   | 1.28979 | 1.02344 | 1.41701 |
| Cxxc4         | -3.01473 | 0.01243 | 0.22838 | 0.20389 | 0.11587 | 0.10762 | 0.07436 | 0.09355 |
| Per2          | -3.01565 | 3.2E-09 | 14.677  | 12.6246 | 8.38659 | 8.02314 | 6.12458 | 7.75635 |
| Cacna1a       | -3.01618 | 0.00026 | 0.44797 | 0.2774  | 0.21004 | 0.17933 | 0.24027 | 0.14418 |
| Tjp3          | -3.018   | 0.00017 | 2.32573 | 4.13849 | 3.10332 | 2.14113 | 1.74807 | 2.4745  |
| Prom1         | -3.02203 | 3.8E-08 | 4.39184 | 3.92988 | 3.3425  | 2.52982 | 1.8372  | 3.12874 |
| Arhgap39      | -3.02216 | 2.2E-09 | 2.60362 | 2.66349 | 2.06646 | 1.82538 | 1.38968 | 1.38139 |
| Neat1         | -3.02385 | 2.7E-07 | 275.199 | 259.169 | 112.706 | 104.637 | 165.434 | 90.8708 |
| Gm10643       | -3.02482 | 0.00392 | 0.81086 | 0.58784 | 0.59508 | 0.4211  | 0.42431 | 0.2847  |
| Nckap5        | -3.02563 | 4.3E-09 | 8.3789  | 8.31893 | 4.6362  | 3.4393  | 3.27378 | 6.35737 |
| Hs6st2        | -3.03243 | 4.1E-08 | 0.65517 | 0.4156  | 0.38733 | 0.34025 | 0.19713 | 0.3163  |

|               |          |         |         |         |         |         |         |         |
|---------------|----------|---------|---------|---------|---------|---------|---------|---------|
| Rbpjl         | -3.04254 | 3.1E-07 | 3.23474 | 4.5688  | 1.76454 | 1.73782 | 1.82109 | 2.10179 |
| Mmp15         | -3.04269 | 4.5E-12 | 12.9298 | 11.1075 | 6.53025 | 6.87006 | 3.68228 | 7.98619 |
| Bcl7a         | -3.04341 | 3.6E-14 | 2.53127 | 1.59551 | 1.24159 | 1.22459 | 1.02238 | 0.87524 |
| Kank3         | -3.0452  | 1.5E-06 | 27.8583 | 28.7402 | 13.8783 | 14.8023 | 14.2926 | 13.3914 |
| Rtn2          | -3.04696 | 5.8E-11 | 17.6846 | 14.0103 | 5.05661 | 8.23064 | 4.83725 | 7.45996 |
| Chrd          | -3.04704 | 0.001   | 0.31291 | 0.23819 | 0.26791 | 0.10427 | 0.18339 | 0.19226 |
| Ccdc157       | -3.04721 | 1.1E-06 | 4.65758 | 4.4369  | 3.88056 | 2.5447  | 2.84941 | 2.79822 |
| Gck           | -3.04761 | 0.01401 | 0.69264 | 0.56035 | 0.75634 | 0.36492 | 0.44124 | 0.46876 |
| Tppp3         | -3.04861 | 5.1E-12 | 45.7182 | 25.876  | 20.9333 | 18.4167 | 12.4557 | 24.7405 |
| 5031434O11Rik | -3.04918 | 0.00052 | 0.68546 | 0.55905 | 0.36332 | 0.20765 | 0.46629 | 0.24067 |
| Ccdc121       | -3.05642 | 0.0005  | 2.3098  | 1.14667 | 1.66238 | 1.06481 | 0.88286 | 1.11071 |
| Cfap161       | -3.05679 | 4.9E-07 | 2.43529 | 1.33276 | 0.91581 | 1.0936  | 0.48275 | 1.12666 |
| Echdc2        | -3.05778 | 1.1E-07 | 4.79253 | 5.03302 | 3.69304 | 3.0005  | 2.48694 | 2.81386 |
| Akap6         | -3.0632  | 0.00052 | 1.84224 | 0.46669 | 0.48768 | 0.50686 | 0.46943 | 0.55413 |
| Zdhc23        | -3.06325 | 0.00324 | 0.59182 | 0.94549 | 0.9759  | 0.67731 | 0.14452 | 0.70034 |
| Rarb          | -3.07027 | 5.8E-08 | 2.28796 | 1.32402 | 1.13413 | 1.09439 | 0.66163 | 0.98654 |
| 5031425E22Rik | -3.07079 | 3.9E-06 | 1.20309 | 0.96255 | 0.51969 | 0.59103 | 0.47642 | 0.45286 |
| Efcab2        | -3.0712  | 7.5E-06 | 2.13436 | 0.91191 | 0.80383 | 0.67992 | 0.69315 | 0.8112  |
| Adamdec1      | -3.07129 | 0.00011 | 1.54426 | 1.40168 | 1.33295 | 0.63898 | 0.71742 | 1.29601 |
| Sec14l4       | -3.07215 | 3.2E-12 | 8.82729 | 6.88996 | 4.21631 | 3.36451 | 3.14706 | 5.25755 |
| Gfra1         | -3.07403 | 4.5E-06 | 3.08573 | 1.60824 | 1.48524 | 1.2026  | 0.85536 | 1.62612 |
| Nr1d1         | -3.07503 | 0.00068 | 15.4654 | 7.83313 | 3.89705 | 3.7229  | 3.17496 | 7.39291 |
| Nek2          | -3.0803  | 0.00415 | 1.96186 | 2.03564 | 3.09397 | 1.61755 | 1.88175 | 1.14331 |
| Ltk           | -3.08144 | 0.01032 | 0.1779  | 0.4084  | 0.31914 | 0.15398 | 0.2048  | 0.18738 |
| Ccdc40        | -3.08209 | 3E-06   | 4.48283 | 2.72834 | 3.52701 | 2.41326 | 1.69752 | 2.79166 |
| Irx5          | -3.09347 | 1.3E-09 | 3.1254  | 2.44577 | 1.56724 | 1.30961 | 1.04853 | 1.81868 |
| Cfap77        | -3.09462 | 6E-07   | 2.15813 | 1.82531 | 1.5895  | 1.34975 | 0.61201 | 1.39734 |
| Klhdc7a       | -3.09537 | 9.5E-08 | 2.1059  | 1.99883 | 1.77637 | 1.26884 | 1.11422 | 1.31312 |
| Foxp2         | -3.09925 | 1.7E-07 | 0.70707 | 0.34969 | 0.31467 | 0.28681 | 0.21949 | 0.27982 |
| Esr2          | -3.10094 | 0.00112 | 0.65086 | 0.52755 | 0.21672 | 0.32862 | 0.29801 | 0.13331 |
| Nat14         | -3.10161 | 4.2E-05 | 1.53693 | 1.22563 | 0.6517  | 0.55872 | 0.38604 | 1.04329 |
| Ace2          | -3.1073  | 0.00035 | 1.94232 | 1.12941 | 0.80379 | 0.83848 | 0.40909 | 0.99454 |
| St8sia6       | -3.10919 | 1.4E-05 | 1.44205 | 1.17934 | 1.45577 | 1.20587 | 0.61989 | 0.80062 |
| Gabbr1        | -3.11165 | 1.1E-07 | 4.47041 | 4.7561  | 2.98149 | 2.35216 | 2.62861 | 2.25528 |
| Ccdc85c       | -3.11178 | 6E-07   | 3.18825 | 2.94625 | 2.56129 | 1.86016 | 1.38411 | 1.93481 |
| Fermt1        | -3.11336 | 6.5E-06 | 0.70519 | 0.7591  | 0.5123  | 0.31073 | 0.32875 | 0.53834 |
| Rnf32         | -3.11345 | 4.4E-05 | 1.00041 | 0.53588 | 0.34262 | 0.34347 | 0.36645 | 0.32784 |
| Dlgap1        | -3.12216 | 0.03521 | 0.08063 | 0.03182 | 0.02455 | 0.01303 | 0.03938 | 0.02202 |
| Tnk1          | -3.12235 | 1.7E-07 | 1.75596 | 1.67081 | 1.47214 | 1.04728 | 0.6633  | 1.34867 |
| Lurap1        | -3.1237  | 0.03713 | 1.86213 | 1.14185 | 0.72632 | 1.03421 | 0.93219 | 1.08061 |
| Catsperg1     | -3.12649 | 0.00695 | 0.4279  | 0.46062 | 0.19244 | 0.15713 | 0.24698 | 0.15935 |
| Ppp1r9a       | -3.12974 | 3E-14   | 3.90971 | 3.5141  | 2.10251 | 1.82422 | 1.57947 | 2.16283 |
| Dock6         | -3.12975 | 8E-08   | 14.1863 | 16.7927 | 9.01185 | 8.3369  | 7.90129 | 7.21705 |
| Cep70         | -3.13025 | 2.6E-14 | 2.47064 | 2.26644 | 1.25837 | 1.11693 | 1.22521 | 1.19888 |
| Coro6         | -3.13192 | 0.03082 | 1.91108 | 0.69273 | 0.51945 | 0.533   | 0.62224 | 0.49704 |
| Foxc1         | -3.13686 | 0.00015 | 1.38635 | 0.68399 | 0.7122  | 0.55998 | 0.54167 | 0.47324 |
| Sptbn2        | -3.13719 | 2E-08   | 1.08485 | 0.80519 | 0.72033 | 0.50974 | 0.57579 | 0.56228 |
| Gm20605       | -3.13802 | 5.3E-09 | 10.5988 | 9.36227 | 4.97532 | 4.77281 | 5.57611 | 4.64328 |
| Slc23a1       | -3.14056 | 1.2E-05 | 2.76439 | 1.45533 | 1.70673 | 1.16217 | 1.03325 | 1.52523 |
| 1700013F07Rik | -3.14144 | 0.00042 | 1.06938 | 0.90446 | 0.64631 | 0.60981 | 0.2765  | 0.56689 |
| Eno3          | -3.14358 | 6.6E-05 | 7.19566 | 2.44327 | 1.73886 | 2.16395 | 2.11629 | 1.67816 |
| Dtx3          | -3.14377 | 1E-05   | 9.94344 | 11.8341 | 9.72984 | 7.46615 | 6.50402 | 5.64417 |
| Pih1h3b       | -3.15179 | 0.01721 | 1.2711  | 0.25597 | 0.3455  | 0.29339 | 0.13303 | 0.59506 |
| 4930451G09Rik | -3.15538 | 0.03601 | 0.12421 | 0.42023 | 0.23634 | 0.15052 | 0.24266 | 0.03392 |
| Gm20219       | -3.15693 | 0.00215 | 1.29557 | 0.73051 | 1.47903 | 0.65414 | 0.58002 | 0.82554 |
| 4933408B17Rik | -3.16269 | 0.0005  | 0.75051 | 0.92042 | 0.29988 | 0.27283 | 0.41237 | 0.4304  |

|               |          |         |         |         |         |         |         |         |
|---------------|----------|---------|---------|---------|---------|---------|---------|---------|
| Zgpat         | -3.16615 | 2.2E-09 | 6.59372 | 6.49717 | 3.55977 | 3.7687  | 3.2838  | 2.87394 |
| Efhc1         | -3.16706 | 8E-06   | 3.9712  | 2.90394 | 3.91963 | 2.23064 | 1.66677 | 2.91453 |
| E030030I06Rik | -3.16936 | 0.00271 | 0.65498 | 0.44318 | 0.52341 | 0.29763 | 0.23992 | 0.45611 |
| Ccdc113       | -3.17277 | 7.8E-11 | 7.37508 | 4.67829 | 3.40016 | 2.8787  | 1.87025 | 4.00869 |
| Cdkl1         | -3.1741  | 0.0042  | 1.83865 | 0.36591 | 0.43215 | 0.52424 | 0.51502 | 0.31013 |
| Tmem132d      | -3.17801 | 1E-06   | 0.606   | 0.64367 | 0.32178 | 0.25616 | 0.22714 | 0.41565 |
| Tbx6          | -3.17964 | 0.00283 | 0.86072 | 1.07056 | 0.4046  | 0.6442  | 0.37092 | 0.24888 |
| D630039A03Rik | -3.18782 | 1.2E-06 | 1.48464 | 1.39217 | 1.25273 | 0.95818 | 0.61475 | 0.81968 |
| Adrb3         | -3.18986 | 1.9E-05 | 1.32569 | 0.61783 | 0.27797 | 0.44259 | 0.31712 | 0.35464 |
| Eno2          | -3.19226 | 0.00125 | 0.66004 | 0.73886 | 0.86431 | 0.54105 | 0.5262  | 0.31808 |
| Ankrd45       | -3.19301 | 8.8E-06 | 1.46727 | 1.05484 | 0.8096  | 0.57785 | 0.41205 | 0.90155 |
| Shank1        | -3.19368 | 0.00013 | 0.37355 | 0.55106 | 0.24793 | 0.28423 | 0.23548 | 0.13522 |
| Gm26908       | -3.19636 | 6.6E-06 | 2.45501 | 1.6045  | 1.14654 | 0.64231 | 1.14452 | 1.09706 |
| Lgals4        | -3.20324 | 1.8E-06 | 1.97273 | 1.73524 | 1.081   | 0.90839 | 1.12727 | 0.58182 |
| Clmn          | -3.20391 | 4.4E-10 | 1.90891 | 1.50474 | 1.45572 | 0.8975  | 0.92857 | 1.07596 |
| Ccdc138       | -3.20421 | 0.00039 | 1.01444 | 1.08044 | 1.32966 | 0.61463 | 0.74318 | 0.70797 |
| Aox1          | -3.20584 | 1.7E-08 | 5.38146 | 4.61377 | 2.85577 | 2.19704 | 2.70271 | 2.29912 |
| Pitpnm3       | -3.2068  | 1.2E-07 | 2.71733 | 2.62097 | 1.89102 | 1.37011 | 1.4044  | 1.44855 |
| Grk4          | -3.20788 | 0.00058 | 1.07812 | 1.43977 | 1.12282 | 0.85949 | 0.80368 | 0.75929 |
| Ppef2         | -3.20998 | 0.02266 | 0.36743 | 0.41436 | 0.20973 | 0.29683 | 0.13459 | 0.10034 |
| Gm9987        | -3.21142 | 0.00524 | 1.28871 | 1.7712  | 1.1034  | 0.87841 | 0.70808 | 0.65987 |
| Bnpl          | -3.21699 | 0.0073  | 0.8748  | 0.47084 | 0.63552 | 0.3132  | 0.17478 | 0.65154 |
| Synm          | -3.21857 | 5.5E-08 | 8.56614 | 5.34618 | 2.58937 | 3.96929 | 2.70757 | 3.65985 |
| Tmem181b-ps   | -3.22234 | 3.6E-05 | 4.55924 | 4.05908 | 3.11295 | 2.96062 | 2.70082 | 2.01951 |
| Ccdc189       | -3.22286 | 5.9E-05 | 1.83955 | 1.55586 | 1.61307 | 0.79149 | 0.95702 | 1.63811 |
| Prpf40b       | -3.22479 | 1.3E-07 | 4.37137 | 3.77523 | 3.17952 | 2.31328 | 2.04037 | 2.31196 |
| Ifi203-ps     | -3.22481 | 0.01898 | 1.13961 | 1.14235 | 0.43366 | 0.40917 | 0.89671 | 0.17289 |
| C530008M17Rik | -3.22697 | 1E-05   | 0.30836 | 0.21399 | 0.11734 | 0.11018 | 0.08109 | 0.17489 |
| Spata5l1      | -3.23315 | 0.00058 | 2.95209 | 3.49555 | 3.63973 | 2.39675 | 1.64364 | 2.22504 |
| Fam184a       | -3.23317 | 5.5E-09 | 1.32191 | 1.59721 | 0.67071 | 0.7755  | 0.50727 | 0.72199 |
| Cep131        | -3.23562 | 2.1E-05 | 2.40676 | 2.25729 | 2.17629 | 1.57371 | 1.32674 | 1.17134 |
| Clasrp        | -3.23624 | 2.3E-07 | 3.72283 | 3.61558 | 2.21293 | 1.8667  | 2.04079 | 1.43032 |
| Iqce          | -3.23723 | 9.3E-09 | 2.17019 | 1.93178 | 1.8278  | 1.21373 | 1.13959 | 1.19358 |
| Grik5         | -3.24114 | 1.7E-05 | 2.40362 | 2.42159 | 1.99746 | 1.18861 | 1.52782 | 1.27418 |
| Gigyf1        | -3.24798 | 5.1E-05 | 8.47838 | 9.41615 | 6.93249 | 5.77022 | 6.0775  | 4.7847  |
| Iqcc          | -3.25294 | 0.00118 | 2.57854 | 2.18088 | 1.34101 | 1.59701 | 1.36429 | 1.07971 |
| Plxnb1        | -3.25361 | 2.8E-07 | 10.9601 | 10.9451 | 8.06604 | 5.88476 | 5.28079 | 6.42037 |
| P4htm         | -3.25683 | 4.9E-05 | 0.96268 | 0.73479 | 0.85776 | 0.52637 | 0.37843 | 0.57709 |
| Nsun7         | -3.25693 | 4.1E-08 | 0.67808 | 0.60219 | 0.44511 | 0.28759 | 0.36015 | 0.29165 |
| Slc38a11      | -3.25751 | 0.00745 | 0.42296 | 0.14309 | 0.169   | 0.16657 | 0.06197 | 0.15593 |
| Carmn         | -3.26145 | 2.7E-05 | 6.93753 | 6.20294 | 8.68929 | 5.35624 | 4.4725  | 4.02725 |
| Hook2         | -3.26179 | 3.6E-06 | 2.66344 | 2.67992 | 2.14939 | 1.50244 | 1.32885 | 1.56129 |
| Gabrp         | -3.26186 | 8E-06   | 12.6309 | 6.35949 | 4.8168  | 4.6376  | 2.49662 | 6.00493 |
| Klhl32        | -3.2637  | 0.0008  | 0.39682 | 0.29613 | 0.26647 | 0.16264 | 0.2052  | 0.16255 |
| Kmt5c         | -3.26512 | 1.7E-07 | 4.20048 | 4.86564 | 3.07524 | 2.66948 | 2.57552 | 1.60842 |
| Lrguk         | -3.2684  | 2.5E-09 | 2.17407 | 1.52485 | 1.08963 | 0.80319 | 0.77693 | 1.04261 |
| Traf3ip1      | -3.27168 | 1.7E-06 | 12.3768 | 11.7376 | 10.7586 | 6.75349 | 6.39931 | 7.8014  |
| Trpm4         | -3.27189 | 4.7E-10 | 2.55637 | 2.37621 | 1.69516 | 1.31883 | 1.10018 | 1.37548 |
| Smim5         | -3.27209 | 0.00017 | 3.15721 | 2.76401 | 1.5176  | 1.87934 | 1.17677 | 1.679   |
| Peli3         | -3.27274 | 5.9E-05 | 0.62725 | 0.38769 | 0.30295 | 0.27772 | 0.28278 | 0.11859 |
| Grip2         | -3.27372 | 0.00181 | 0.24985 | 0.30378 | 0.08914 | 0.07569 | 0.1144  | 0.16631 |
| Proz          | -3.27944 | 9.2E-05 | 0.62549 | 1.03021 | 0.33824 | 0.30916 | 0.39793 | 0.37758 |
| Prom2         | -3.28104 | 0.00422 | 0.31696 | 0.07447 | 0.14072 | 0.11736 | 0.0516  | 0.10098 |
| Esrrg         | -3.28239 | 3.7E-05 | 0.63265 | 0.34843 | 0.16796 | 0.16046 | 0.17246 | 0.27723 |
| Zfp69         | -3.28504 | 0.0001  | 0.95212 | 1.47173 | 0.93702 | 0.59676 | 0.5532  | 0.78003 |
| Ino80dos      | -3.28523 | 0.00013 | 1.48413 | 1.39871 | 0.96817 | 1.20751 | 0.90088 | 1.21588 |



|               |          |         |         |         |         |         |         |         |
|---------------|----------|---------|---------|---------|---------|---------|---------|---------|
| Nphp4         | -3.28796 | 2.4E-06 | 0.71027 | 0.71577 | 0.72459 | 0.47612 | 0.37642 | 0.3838  |
| Cntfr         | -3.28885 | 2.7E-06 | 1.67441 | 1.22181 | 1.01198 | 0.59676 | 0.64941 | 0.91452 |
| Gm26583       | -3.28916 | 0.01512 | 0.57024 | 0.25163 | 0.11322 | 0.18026 | 0.18163 | 0.10156 |
| Rd3           | -3.29375 | 0.00031 | 0.62018 | 0.32558 | 0.48828 | 0.20731 | 0.235   | 0.36792 |
| Lncpint       | -3.29465 | 1.3E-12 | 13.1562 | 10.5731 | 4.14324 | 5.65004 | 4.94834 | 3.75796 |
| Pxmp2         | -3.29568 | 0.0027  | 2.35955 | 0.70814 | 0.60825 | 0.87621 | 0.55761 | 0.99772 |
| Sptb          | -3.29704 | 1.1E-06 | 0.80457 | 0.37522 | 0.19744 | 0.19135 | 0.23687 | 0.27721 |
| Gm35339       | -3.29754 | 2.3E-06 | 0.55628 | 0.59191 | 0.32777 | 0.29355 | 0.24977 | 0.24992 |
| mt-Nd1        | -3.30126 | 0.01182 | 827.097 | 651.837 | 1020.05 | 495.225 | 415.674 | 724.676 |
| Pabpn1        | -3.30173 | 8.2E-05 | 20.1334 | 23.1628 | 19.7205 | 10.3751 | 12.0157 | 10.0347 |
| Ccdc153       | -3.30174 | 7.1E-06 | 17.2716 | 11.5726 | 11.1646 | 6.25155 | 5.48847 | 11.6507 |
| Lrrc51        | -3.30619 | 3.8E-06 | 6.49176 | 7.4698  | 6.98016 | 3.79604 | 2.98621 | 3.15395 |
| lqcg          | -3.30788 | 1.6E-08 | 3.98382 | 2.65539 | 2.46975 | 1.96615 | 1.41094 | 2.03175 |
| Wdr78         | -3.30906 | 2.5E-11 | 3.35    | 2.59021 | 2.19759 | 1.75706 | 1.30951 | 1.53611 |
| Shisa9        | -3.31345 | 0.03631 | 0.44782 | 0.0909  | 0.0818  | 0.08682 | 0.02625 | 0.20545 |
| Ccdc148       | -3.31519 | 0.0002  | 0.34471 | 0.19159 | 0.21362 | 0.11338 | 0.06494 | 0.24206 |
| Gm1673        | -3.31537 | 0.00269 | 1.09223 | 2.07852 | 1.40276 | 0.99264 | 0.5001  | 1.00667 |
| Mak           | -3.31647 | 8.1E-08 | 2.43396 | 2.16695 | 1.75492 | 1.31946 | 0.78832 | 1.51127 |
| Tsga10        | -3.31667 | 4.3E-09 | 1.799   | 1.15928 | 1.10511 | 0.85641 | 0.72172 | 0.70885 |
| Plekhg5       | -3.32661 | 2.7E-08 | 5.15332 | 5.95206 | 3.79552 | 3.04397 | 2.82809 | 2.49682 |
| Pcyt1b        | -3.32696 | 8.4E-05 | 0.4433  | 0.51915 | 0.6034  | 0.30991 | 0.29978 | 0.29334 |
| Lonrf2        | -3.32883 | 0.01095 | 0.11859 | 0.11144 | 0.12034 | 0.07983 | 0.04826 | 0.05397 |
| Murc          | -3.33284 | 0.00448 | 0.75596 | 0.67699 | 0.30459 | 0.10777 | 0.39092 | 0.43717 |
| Fam131a       | -3.3376  | 1.7E-06 | 3.00937 | 2.22034 | 1.7543  | 1.37719 | 0.89124 | 1.59992 |
| Slco1a5       | -3.3382  | 0.0005  | 0.51534 | 0.39435 | 0.30816 | 0.23789 | 0.23371 | 0.16084 |
| Gm45396       | -3.34362 | 0.00013 | 10.5425 | 12.7043 | 13.42   | 8.98778 | 5.74128 | 7.87271 |
| Aldh3a1       | -3.34493 | 9.2E-05 | 4.51514 | 1.31272 | 1.71817 | 1.73828 | 0.62021 | 1.65687 |
| Cux2          | -3.3469  | 3.5E-07 | 0.60698 | 0.48273 | 0.43438 | 0.1976  | 0.27875 | 0.3711  |
| Nrbp2         | -3.35301 | 7.9E-07 | 18.4506 | 19.4445 | 13.9586 | 8.87212 | 11.6394 | 8.42763 |
| Syt17         | -3.35737 | 0.00209 | 0.44994 | 0.23256 | 0.11415 | 0.1666  | 0.07325 | 0.16383 |
| 4932411E22Rik | -3.35763 | 3E-08   | 1.06533 | 1.42665 | 1.03038 | 0.68133 | 0.61786 | 0.69095 |
| Col4a6        | -3.35844 | 5.2E-14 | 2.94416 | 1.67623 | 1.41243 | 1.16607 | 0.86443 | 1.2107  |
| Agbl4         | -3.35869 | 0.00402 | 0.14273 | 0.08048 | 0.13035 | 0.06918 | 0.06971 | 0.04677 |
| Ankrd42       | -3.36082 | 3.6E-05 | 2.5078  | 1.84835 | 2.39258 | 1.37834 | 1.29916 | 1.32077 |
| Proser3       | -3.36273 | 3.3E-05 | 0.96172 | 1.03325 | 0.80118 | 0.62994 | 0.47605 | 0.42589 |
| Cdhr4         | -3.3707  | 4.5E-06 | 8.41111 | 8.36643 | 10.0755 | 5.58064 | 3.44981 | 7.27908 |
| Fanca         | -3.37171 | 8.8E-06 | 0.86531 | 0.82886 | 1.01165 | 0.60008 | 0.58046 | 0.35873 |
| Ushbp1        | -3.37229 | 3.3E-07 | 6.50291 | 7.11419 | 2.61445 | 2.98926 | 2.76518 | 2.5827  |
| Gstm6         | -3.37716 | 0.00537 | 0.68882 | 0.23304 | 0.31454 | 0.25041 | 0.06728 | 0.30097 |
| Grm4          | -3.38156 | 0.00011 | 0.60113 | 0.40674 | 0.19607 | 0.18731 | 0.27681 | 0.14071 |
| Arhgef19      | -3.38256 | 2.3E-06 | 1.7656  | 1.43868 | 1.47484 | 0.9132  | 0.80447 | 0.91728 |
| Akap14        | -3.38306 | 0.00016 | 1.88588 | 1.4226  | 1.51287 | 0.80292 | 0.70946 | 1.1692  |
| Rilp          | -3.38526 | 7.1E-08 | 2.71186 | 3.02565 | 2.23956 | 1.67802 | 1.22583 | 1.41811 |
| Dnali1        | -3.38718 | 3.9E-10 | 6.50882 | 4.20122 | 4.30187 | 3.21713 | 1.97634 | 3.12226 |
| Spata18       | -3.38916 | 3E-10   | 15.5192 | 11.1826 | 9.45223 | 6.61872 | 5.24001 | 8.20384 |
| Klhdc8b       | -3.39203 | 1.9E-07 | 2.80326 | 3.11316 | 1.65577 | 1.24799 | 1.51792 | 1.23816 |
| Ltf           | -3.39824 | 0.0006  | 17.4733 | 5.86665 | 5.56115 | 6.84931 | 3.97601 | 3.81736 |
| Cep126        | -3.39897 | 4E-12   | 5.32275 | 3.54796 | 2.55257 | 2.09802 | 1.69603 | 2.26951 |
| Asb2          | -3.40003 | 4.2E-05 | 2.3724  | 0.80698 | 0.58877 | 0.73432 | 0.58563 | 0.42252 |
| Rsph4a        | -3.40085 | 4.3E-10 | 5.12992 | 4.16948 | 3.37097 | 2.77457 | 1.52159 | 2.74714 |
| Mst1          | -3.40383 | 0.00631 | 0.88834 | 0.75134 | 0.64536 | 0.36698 | 0.38456 | 0.46313 |
| Stx1a         | -3.405   | 0.00024 | 0.99354 | 1.44883 | 1.13424 | 0.66424 | 0.50198 | 0.8701  |
| Stmnd1        | -3.40614 | 0.00014 | 4.4228  | 1.64365 | 2.21854 | 1.13684 | 1.57097 | 1.647   |
| Hcn4          | -3.40852 | 0.00398 | 0.2538  | 0.12627 | 0.06817 | 0.05427 | 0.0875  | 0.08562 |
| Wif1          | -3.40892 | 0.00084 | 0.86558 | 0.47745 | 0.25778 | 0.18241 | 0.16542 | 0.49331 |
| Tcte1         | -3.41263 | 6.1E-08 | 3.06043 | 2.06072 | 2.13699 | 1.22417 | 1.02307 | 1.70398 |

|               |          |         |         |         |         |         |         |         |
|---------------|----------|---------|---------|---------|---------|---------|---------|---------|
| Ccser1        | -3.41297 | 2.8E-08 | 1.73359 | 1.3454  | 1.31576 | 0.81951 | 0.75364 | 0.85059 |
| Drc7          | -3.41535 | 2.3E-08 | 4.00443 | 3.95566 | 2.93133 | 2.00024 | 1.97067 | 1.97841 |
| Nap1l3        | -3.41826 | 0.00342 | 0.25756 | 0.57183 | 0.4043  | 0.33161 | 0.14152 | 0.18463 |
| 2010007H06Rik | -3.43123 | 8.9E-05 | 1.75863 | 1.58136 | 1.45819 | 1.02066 | 0.94932 | 0.68247 |
| Rgl3          | -3.4322  | 2.9E-09 | 2.35094 | 1.90964 | 1.43493 | 1.01541 | 0.98903 | 1.01069 |
| Dalrd3        | -3.43391 | 2.6E-08 | 8.88108 | 9.08289 | 7.76309 | 4.75049 | 5.19953 | 4.74911 |
| 4933413J09Rik | -3.43405 | 0.00893 | 0.16995 | 0.22359 | 0.10779 | 0.0572  | 0.11067 | 0.09282 |
| Mib2          | -3.44414 | 1.4E-11 | 5.80044 | 5.93615 | 3.73029 | 3.1278  | 2.60628 | 2.55027 |
| Nhlrc1        | -3.44685 | 0.0003  | 1.23483 | 1.21285 | 1.40969 | 0.89297 | 0.58363 | 0.68531 |
| Gm37240       | -3.44725 | 0.00022 | 1.97892 | 1.75498 | 0.96507 | 0.90797 | 0.68968 | 0.62961 |
| Chadl         | -3.45005 | 0.02195 | 0.4783  | 0.24895 | 0.10501 | 0.11146 | 0.22911 | 0.19593 |
| Ptgfr         | -3.45029 | 0.00041 | 1.80573 | 0.67245 | 0.27691 | 0.44089 | 0.25668 | 0.59616 |
| KIAA1683      | -3.45359 | 0.00713 | 0.43836 | 0.28649 | 0.04549 | 0.07243 | 0.17517 | 0.13059 |
| Lca5l         | -3.45886 | 8.8E-05 | 0.56027 | 0.59233 | 0.52767 | 0.20367 | 0.3694  | 0.34425 |
| Muc6          | -3.46099 | 3.7E-06 | 2.31247 | 2.40148 | 0.94681 | 0.67985 | 1.3224  | 0.77539 |
| Mtcl1         | -3.46702 | 3.3E-11 | 6.67194 | 7.10169 | 4.14026 | 3.28409 | 2.5847  | 3.76244 |
| Tekt2         | -3.46744 | 8.5E-05 | 2.21133 | 1.82965 | 2.14031 | 0.93204 | 0.88044 | 1.26028 |
| Arhgef38      | -3.46767 | 1.1E-15 | 2.49812 | 2.04684 | 1.19677 | 1.24329 | 0.66178 | 1.07812 |
| Grb7          | -3.47195 | 5E-15   | 2.79577 | 2.98447 | 1.39442 | 1.43078 | 0.89483 | 1.37872 |
| Adamts20      | -3.47496 | 0.0158  | 0.18274 | 0.13738 | 0.27815 | 0.09226 | 0.20081 | 0.04159 |
| Fank1         | -3.47529 | 6.6E-08 | 2.14538 | 1.61291 | 1.40601 | 0.91471 | 1.01869 | 0.71607 |
| mt-Co3        | -3.47777 | 0.03226 | 1291.66 | 1171.88 | 1762.77 | 874.779 | 579.176 | 999.405 |
| Sult5a1       | -3.47913 | 4.6E-07 | 1.38484 | 0.83912 | 0.77867 | 0.5385  | 0.87825 | 0.49107 |
| Amy1          | -3.47927 | 0.00014 | 0.82167 | 0.40352 | 0.33285 | 0.27301 | 0.31068 | 0.152   |
| Eps8l1        | -3.48289 | 2.8E-06 | 3.91922 | 5.02981 | 3.23041 | 1.96202 | 2.30583 | 2.18189 |
| Kcnma1        | -3.48479 | 6.8E-05 | 0.53921 | 0.21134 | 0.15014 | 0.1514  | 0.14452 | 0.14007 |
| Gm13307       | -3.49104 | 0.00912 | 1.53693 | 0.46425 | 0.87728 | 0.39909 | 0.24127 | 0.62957 |
| Cfap206       | -3.49351 | 7.8E-12 | 5.84649 | 3.76307 | 3.73597 | 2.33924 | 1.61626 | 3.22331 |
| Megf6         | -3.49413 | 6.9E-11 | 9.10245 | 8.14002 | 3.82563 | 3.64623 | 3.10909 | 3.89487 |
| Rap1gap       | -3.4962  | 1.4E-09 | 3.1966  | 4.12154 | 2.83831 | 1.95398 | 1.80059 | 1.80409 |
| 1810064F22Rik | -3.49621 | 3.8E-05 | 0.7299  | 1.06632 | 0.53026 | 0.38193 | 0.34028 | 0.43489 |
| mt-Atp6       | -3.4963  | 0.04304 | 1592.31 | 1489.9  | 2307.14 | 1083.07 | 696.94  | 1215.17 |
| Osbpl6        | -3.49688 | 1.8E-15 | 6.20838 | 4.51396 | 3.24326 | 2.73317 | 1.94829 | 2.64723 |
| Kcnd3         | -3.51383 | 5.8E-06 | 0.46683 | 0.21757 | 0.23928 | 0.1674  | 0.13959 | 0.1483  |
| Dnaic2        | -3.51591 | 1.1E-06 | 2.4594  | 2.01247 | 2.12286 | 1.19935 | 0.80565 | 1.70364 |
| Ccdc85b       | -3.51612 | 4.1E-07 | 15.8978 | 15.7294 | 10.1018 | 7.2696  | 6.81219 | 7.74092 |
| BC051019      | -3.52094 | 4.2E-09 | 4.98606 | 4.14249 | 4.38242 | 2.29914 | 1.93952 | 3.21728 |
| Elmod1        | -3.52769 | 1.9E-12 | 2.30523 | 1.40285 | 1.12327 | 0.93681 | 0.65904 | 0.8061  |
| Dock3         | -3.52809 | 0.04612 | 0.08218 | 0.02139 | 0.02887 | 0.05362 | 0.01853 | 0.01036 |
| Ccdc159       | -3.53171 | 0.00022 | 0.96233 | 0.99086 | 0.42989 | 0.40561 | 0.42913 | 0.34278 |
| D830026I12Rik | -3.53177 | 1.9E-05 | 0.86494 | 0.84128 | 0.74056 | 0.52405 | 0.34851 | 0.31887 |
| Ppp1r32       | -3.53584 | 0.00022 | 1.69144 | 0.74179 | 1.35882 | 0.45547 | 0.64251 | 0.87249 |
| 1700030J22Rik | -3.54146 | 2.8E-07 | 1.98162 | 1.31503 | 1.25293 | 0.81273 | 0.82637 | 0.67436 |
| Slc44a4       | -3.54601 | 1E-09   | 3.05241 | 2.90439 | 2.41245 | 1.61823 | 0.90307 | 1.99576 |
| 4930579K19Rik | -3.5527  | 0.03347 | 0.72261 | 0.97787 | 1.31989 | 0.52538 | 0.52938 | 0.4736  |
| RP23-163N19.1 | -3.5542  | 4.5E-06 | 0.59023 | 0.46355 | 0.3369  | 0.21712 | 0.20076 | 0.27631 |
| Klk11         | -3.55518 | 0.02036 | 0.99618 | 0.42128 | 0.42647 | 0.41495 | 0.22806 | 0.40807 |
| Myo5c         | -3.55567 | 3E-09   | 9.28729 | 9.28104 | 8.84969 | 4.85658 | 4.64398 | 5.911   |
| Hap1          | -3.55643 | 0.00054 | 1.45519 | 2.52309 | 2.65801 | 1.32251 | 1.45695 | 1.09283 |
| Faah          | -3.55649 | 1.6E-10 | 2.05201 | 2.13986 | 1.46411 | 1.05255 | 0.81143 | 1.12711 |
| Spag16        | -3.56598 | 6.7E-12 | 2.63318 | 1.59894 | 1.52615 | 1.0636  | 0.78151 | 1.13947 |
| Map3k19       | -3.56944 | 3.9E-07 | 2.63744 | 1.59788 | 1.98592 | 1.57531 | 0.8222  | 0.95011 |
| Spag17        | -3.57049 | 4.8E-08 | 2.7652  | 1.86554 | 2.21096 | 1.27773 | 1.06412 | 1.48089 |
| Maats1        | -3.57758 | 5.2E-11 | 2.15552 | 1.85718 | 1.77082 | 1.24496 | 0.78218 | 0.95723 |
| Wnt10b        | -3.57889 | 0.00016 | 1.29141 | 0.99295 | 0.13403 | 0.56905 | 0.31536 | 0.22442 |
| Neurl2        | -3.57907 | 0.00121 | 3.0626  | 2.97122 | 1.74814 | 0.92779 | 1.64974 | 1.10694 |

|               |          |         |         |         |         |         |         |         |
|---------------|----------|---------|---------|---------|---------|---------|---------|---------|
| Morn3         | -3.58147 | 0.00027 | 1.62018 | 1.99838 | 2.46614 | 1.02254 | 0.69238 | 1.65918 |
| mt-Co1        | -3.5817  | 0.00958 | 2025.27 | 1788.54 | 2818.16 | 1428.66 | 1075.25 | 1527.87 |
| Gm21988       | -3.5824  | 0.00036 | 2.86105 | 2.87639 | 2.64993 | 1.66805 | 1.34459 | 2.74196 |
| Katnal2       | -3.58689 | 9.4E-05 | 0.42734 | 0.32339 | 0.46217 | 0.27254 | 0.16477 | 0.16584 |
| Trp63         | -3.58979 | 0.00318 | 0.26124 | 0.10127 | 0.06213 | 0.08574 | 0.04785 | 0.06242 |
| Ttc39a        | -3.59059 | 1.6E-08 | 3.5574  | 2.8355  | 3.01928 | 1.96353 | 1.21437 | 1.98364 |
| Trpv3         | -3.59454 | 0.04554 | 0.12523 | 0.11915 | 0.03574 | 0.03794 | 0.08027 | 0.01282 |
| Lrrc48        | -3.59459 | 2E-08   | 3.98174 | 2.56423 | 3.39188 | 2.0206  | 1.4511  | 1.98705 |
| Ccdc24        | -3.59827 | 0.00015 | 1.74906 | 1.82335 | 1.81099 | 0.99811 | 0.68537 | 0.88308 |
| Col19a1       | -3.60027 | 0.0382  | 0.06631 | 0.04487 | 0.0757  | 0.02411 | 0.04858 | 0.01087 |
| 1700024G13Rik | -3.60117 | 0.00129 | 3.44237 | 2.9115  | 2.61989 | 1.2514  | 0.84062 | 2.44416 |
| Dpp6          | -3.60174 | 0.0009  | 0.27319 | 0.10013 | 0.14554 | 0.11587 | 0.08006 | 0.05222 |
| Wdr60         | -3.60445 | 1.1E-05 | 3.75158 | 4.35513 | 4.17086 | 2.4513  | 1.99393 | 2.4106  |
| Rbm24         | -3.60804 | 4.1E-06 | 2.67052 | 1.3456  | 0.71352 | 0.80901 | 0.56195 | 0.86117 |
| Spag6l        | -3.60816 | 4.9E-11 | 3.3057  | 2.50784 | 2.26429 | 1.44449 | 1.10079 | 1.67417 |
| Lmntd1        | -3.61413 | 0.00042 | 0.51863 | 0.33895 | 0.12111 | 0.19282 | 0.13816 | 0.13519 |
| Kctd8         | -3.6151  | 0.0002  | 0.70405 | 0.32064 | 0.49462 | 0.22969 | 0.09919 | 0.44369 |
| Pgam2         | -3.61708 | 0.04248 | 6.85032 | 0.73573 | 0.24827 | 0.98821 | 0.63727 | 1.60348 |
| Zfp692        | -3.6196  | 1.6E-05 | 2.5126  | 3.38444 | 3.24022 | 1.6633  | 1.97706 | 1.29607 |
| Rac3          | -3.62108 | 2.2E-09 | 5.72184 | 2.98731 | 2.25801 | 1.62638 | 1.55251 | 2.14128 |
| 9530026P05Rik | -3.62464 | 8.7E-12 | 1.30255 | 0.90015 | 0.43522 | 0.42347 | 0.36075 | 0.48151 |
| Wdr54         | -3.62606 | 1.2E-05 | 0.61244 | 0.57686 | 0.4926  | 0.24457 | 0.40788 | 0.30789 |
| Klhl41        | -3.63431 | 0.01622 | 0.9029  | 0.18328 | 0.12369 | 0.2407  | 0.18521 | 0.11835 |
| Catsper2      | -3.63604 | 0.01278 | 0.24719 | 0.45996 | 0.45151 | 0.16475 | 0.23542 | 0.22277 |
| Pcsk1         | -3.64166 | 0.00193 | 0.33818 | 0.16685 | 0.25738 | 0.18782 | 0.06194 | 0.09235 |
| Ugt8a         | -3.64208 | 0.00078 | 0.38259 | 0.20437 | 0.16091 | 0.1708  | 0.08851 | 0.08248 |
| Kctd14        | -3.6452  | 0.00018 | 1.316   | 1.2033  | 1.13692 | 0.56029 | 0.33874 | 1.049   |
| Ngef          | -3.64723 | 4.9E-12 | 3.32137 | 2.43328 | 1.92255 | 1.20458 | 1.25088 | 1.26471 |
| Rec8          | -3.65103 | 0.0054  | 0.86418 | 1.96784 | 2.27667 | 0.96663 | 0.92529 | 1.14367 |
| Akap8l        | -3.65243 | 1E-06   | 11.3127 | 12.5837 | 11.0553 | 6.74746 | 6.1915  | 5.87813 |
| Map4k2        | -3.67395 | 8.7E-17 | 12.0941 | 11.6587 | 6.69936 | 5.53732 | 4.64144 | 4.92029 |
| Drc1          | -3.67476 | 1.7E-09 | 4.97029 | 3.45517 | 2.75933 | 2.22762 | 1.34675 | 2.00808 |
| Appl2         | -3.67541 | 2E-08   | 10.2714 | 9.02504 | 9.18444 | 5.58143 | 4.92655 | 4.79237 |
| Ln timer      | -3.67731 | 1.1E-05 | 0.8826  | 0.40351 | 0.43571 | 0.31796 | 0.34951 | 0.2736  |
| Gsg1l         | -3.67828 | 0.00053 | 0.30267 | 0.27569 | 0.18606 | 0.15517 | 0.05117 | 0.1526  |
| Zfp579        | -3.6787  | 3.8E-06 | 3.73344 | 4.17928 | 2.7077  | 1.82293 | 1.88239 | 1.67326 |
| Ccdc81        | -3.67995 | 2.7E-06 | 1.76782 | 1.4952  | 1.23332 | 0.81324 | 0.45568 | 1.01918 |
| Hpse2         | -3.68043 | 0.00215 | 0.77013 | 0.43424 | 0.29306 | 0.21775 | 0.26329 | 0.21031 |
| Gm42984       | -3.68329 | 0.00794 | 1.01795 | 0.70442 | 0.52822 | 0.50462 | 0.40677 | 0.07581 |
| Tbc1d30       | -3.68337 | 1.8E-21 | 4.25311 | 3.29857 | 1.97879 | 1.69199 | 1.17577 | 1.77507 |
| Pkn3          | -3.68646 | 4.2E-06 | 5.0445  | 4.52073 | 1.98496 | 1.92486 | 2.39032 | 0.98482 |
| Ankrd13d      | -3.68973 | 0.00015 | 1.18813 | 1.44454 | 1.10206 | 0.76486 | 0.68001 | 0.42586 |
| Arhgdig       | -3.69241 | 9.3E-09 | 2.75249 | 3.2307  | 2.46891 | 1.54856 | 1.0288  | 1.67974 |
| Cracr2b       | -3.69432 | 1.9E-07 | 10.8719 | 10.9002 | 8.11084 | 4.64502 | 3.94605 | 5.5499  |
| Cdc14a        | -3.69673 | 1.5E-09 | 3.94843 | 2.92378 | 2.9805  | 1.58672 | 1.50533 | 2.0927  |
| Cyp2f2        | -3.70198 | 2.4E-05 | 505.492 | 179.834 | 116.321 | 130.493 | 61.5272 | 166.139 |
| Rgs9          | -3.72368 | 1.4E-11 | 3.07317 | 2.23655 | 1.19121 | 0.8747  | 0.82725 | 1.39353 |
| Baiap3        | -3.7261  | 5E-08   | 1.39365 | 1.13339 | 0.48954 | 0.40054 | 0.34033 | 0.70262 |
| Jhy           | -3.72664 | 0.00067 | 0.65573 | 0.69326 | 0.62382 | 0.38074 | 0.22018 | 0.40291 |
| Vipr1         | -3.72688 | 9.9E-06 | 0.70865 | 0.42622 | 0.34158 | 0.26716 | 0.23074 | 0.19352 |
| Acsl1         | -3.73091 | 1.3E-14 | 8.78525 | 3.67438 | 2.78836 | 2.31631 | 2.14298 | 2.54676 |
| AA415398      | -3.73174 | 0.0003  | 0.4964  | 0.58779 | 0.3778  | 0.30076 | 0.29093 | 0.18978 |
| Agbl2         | -3.75614 | 4.9E-12 | 1.53832 | 1.11521 | 1.01919 | 0.68239 | 0.42261 | 0.70891 |
| Synpo2l       | -3.76248 | 0.0021  | 0.82873 | 0.16689 | 0.0901  | 0.17933 | 0.14455 | 0.12932 |
| Pnma1         | -3.76706 | 1.2E-05 | 1.81978 | 0.98243 | 0.79563 | 0.60993 | 0.39711 | 0.53925 |
| Cdhr3         | -3.77368 | 3.7E-15 | 13.7331 | 9.6532  | 7.87421 | 5.15356 | 3.73881 | 6.61373 |



|               |          |         |         |         |         |         |         |         |
|---------------|----------|---------|---------|---------|---------|---------|---------|---------|
| A830018L16Rik | -3.77949 | 7.7E-08 | 0.41775 | 0.24396 | 0.20439 | 0.15066 | 0.12387 | 0.12223 |
| AU022754      | -3.78151 | 0.00946 | 0.21484 | 0.23362 | 0.45549 | 0.20455 | 0.11242 | 0.12572 |
| Slc6a17       | -3.78802 | 0.00013 | 0.48853 | 0.15025 | 0.09126 | 0.09149 | 0.08459 | 0.14554 |
| Tmprss6       | -3.78925 | 0.02283 | 0.20036 | 0.16946 | 0.13071 | 0.06937 | 0.08388 | 0.07035 |
| Efcab5        | -3.78971 | 6.9E-05 | 0.45987 | 0.28423 | 0.22211 | 0.10716 | 0.15549 | 0.18838 |
| Chrm3         | -3.79109 | 3.4E-05 | 0.68903 | 0.39423 | 0.43957 | 0.30697 | 0.11877 | 0.18263 |
| 4430402I18Rik | -3.79328 | 1.1E-08 | 1.04482 | 0.86944 | 0.73105 | 0.46967 | 0.2963  | 0.56605 |
| Tef           | -3.79419 | 0       | 24.1206 | 16.1772 | 9.33339 | 7.99314 | 6.72111 | 8.27733 |
| Gpr155        | -3.79644 | 4.1E-12 | 6.81032 | 2.63713 | 1.92026 | 1.69027 | 1.49275 | 1.96063 |
| Vit           | -3.80364 | 0.00347 | 0.53728 | 0.25561 | 0.11501 | 0.14242 | 0.0492  | 0.22009 |
| Rassf10       | -3.80495 | 2.7E-06 | 0.91442 | 0.88389 | 0.62634 | 0.33242 | 0.26796 | 0.57791 |
| Adam28        | -3.80743 | 2.5E-12 | 4.31868 | 2.81297 | 2.40844 | 1.44365 | 1.23644 | 1.93172 |
| Itga10        | -3.80764 | 5E-06   | 0.63404 | 0.84908 | 0.28149 | 0.35214 | 0.27096 | 0.15872 |
| Lpar3         | -3.81972 | 5.2E-10 | 4.26292 | 2.25736 | 1.94663 | 1.25772 | 0.869   | 1.88287 |
| Galnt5        | -3.82166 | 7.2E-06 | 0.53222 | 0.36358 | 0.42064 | 0.18604 | 0.22494 | 0.20124 |
| Fmo3          | -3.82391 | 2.6E-06 | 14.1568 | 5.60259 | 4.62372 | 3.27957 | 3.85452 | 3.7523  |
| 4930562C15Rik | -3.83535 | 1.2E-06 | 4.9302  | 4.66387 | 5.68718 | 3.02876 | 2.44145 | 2.75841 |
| BC021891      | -3.83613 | 1.3E-05 | 0.33692 | 0.32567 | 0.40295 | 0.15553 | 0.1528  | 0.2103  |
| Dzank1        | -3.8422  | 2.9E-08 | 1.81304 | 1.13138 | 1.02227 | 0.56934 | 0.42924 | 0.48002 |
| Nrn1          | -3.8424  | 1.3E-05 | 1.91364 | 1.0936  | 0.35426 | 0.62673 | 0.26523 | 0.59321 |
| Cfap43        | -3.84304 | 5.5E-08 | 7.25746 | 6.55728 | 7.55196 | 4.29711 | 3.52883 | 3.47272 |
| Gm29811       | -3.84513 | 0.02604 | 0.81991 | 0.64723 | 0.312   | 0.16559 | 0.36039 | 0.31347 |
| Atp6v1c2      | -3.84875 | 2.3E-08 | 6.35392 | 3.80661 | 3.07273 | 1.79119 | 1.26069 | 3.28958 |
| Lypd6b        | -3.84901 | 1.7E-06 | 0.8769  | 1.09766 | 0.76081 | 0.42504 | 0.33405 | 0.54599 |
| mt-Cytb       | -3.85015 | 0.00302 | 1318.09 | 1198.75 | 1728.77 | 836.677 | 559.054 | 999.594 |
| Sox6          | -3.85297 | 2E-10   | 0.73273 | 0.3337  | 0.30564 | 0.20917 | 0.18065 | 0.23665 |
| Bmpr1b        | -3.85445 | 5.2E-10 | 1.77712 | 0.91997 | 0.47221 | 0.43626 | 0.41526 | 0.55224 |
| Lekr1         | -3.85659 | 1.2E-06 | 0.50932 | 0.60308 | 0.40701 | 0.30859 | 0.17412 | 0.25036 |
| Rhbg          | -3.88378 | 0.00712 | 0.80162 | 0.79764 | 0.32299 | 0.19999 | 0.27636 | 0.50221 |
| Ccdc171       | -3.88838 | 1.2E-10 | 1.87273 | 1.73845 | 1.18194 | 0.89481 | 0.72502 | 0.62368 |
| Lrrc56        | -3.89456 | 1.1E-06 | 1.32461 | 0.99302 | 1.11695 | 0.5472  | 0.57342 | 0.56726 |
| 6820408C15Rik | -3.89557 | 1.1E-05 | 3.98676 | 2.85317 | 3.55935 | 1.4555  | 1.79734 | 1.92621 |
| Klkb1_1       | -3.90131 | 0.00017 | 0.33062 | 0.52983 | 0.17879 | 0.10543 | 0.25496 | 0.07128 |
| Kif19a        | -3.90407 | 8.2E-06 | 2.73923 | 1.93699 | 3.10149 | 1.30596 | 1.11851 | 1.71069 |
| Ccdc191       | -3.91278 | 3.1E-09 | 2.56954 | 2.86726 | 2.7362  | 1.12511 | 1.07567 | 1.45058 |
| Tex9          | -3.91662 | 0.00041 | 0.68519 | 0.64098 | 0.90073 | 0.38998 | 0.50196 | 0.29768 |
| Drp2          | -3.92524 | 7.6E-05 | 0.13883 | 0.27096 | 0.08534 | 0.09058 | 0.09388 | 0.035   |
| Izumo4        | -3.92541 | 3.4E-05 | 2.337   | 3.95318 | 2.77909 | 1.59294 | 1.21271 | 1.5955  |
| Syne4         | -3.92588 | 0.00013 | 0.86811 | 1.33735 | 1.55735 | 0.82653 | 0.59055 | 0.5334  |
| Espn          | -3.9279  | 2.3E-11 | 0.77292 | 0.69108 | 0.40337 | 0.36795 | 0.24267 | 0.22615 |
| Lrrc10b       | -3.93308 | 1E-06   | 5.76082 | 4.72363 | 5.1709  | 2.55784 | 1.93298 | 3.4226  |
| Cpne7         | -3.93536 | 0.01389 | 0.17338 | 0.17597 | 0.09897 | 0.10505 | 0.05081 | 0.07102 |
| Gm8066        | -3.94033 | 0.00137 | 3.7665  | 2.54851 | 3.0099  | 1.02693 | 1.10372 | 1.23429 |
| Eno4          | -3.94911 | 8.2E-13 | 3.87385 | 2.82555 | 2.43435 | 1.65804 | 0.98938 | 1.6014  |
| Cfap54        | -3.9524  | 6.8E-09 | 3.71701 | 2.61626 | 3.06385 | 1.49629 | 1.30153 | 1.9355  |
| Bves          | -3.96353 | 0.00782 | 0.63401 | 0.1173  | 0.11309 | 0.10804 | 0.07257 | 0.17855 |
| A730020E08Rik | -3.9741  | 0.00022 | 0.53935 | 0.21817 | 0.21416 | 0.12787 | 0.10308 | 0.19212 |
| Firre         | -3.97534 | 2E-09   | 8.73837 | 9.00193 | 6.86546 | 3.43567 | 4.61667 | 3.65661 |
| Cfap69        | -3.98594 | 4.4E-13 | 3.53565 | 2.50176 | 2.20283 | 1.40012 | 1.21045 | 1.23058 |
| C230062I16Rik | -3.98726 | 0.00233 | 0.43347 | 0.83799 | 0.919   | 0.26263 | 0.31755 | 0.35512 |
| Myo15b        | -3.98749 | 0.0004  | 0.30579 | 0.18809 | 0.26446 | 0.17404 | 0.13577 | 0.03796 |
| Ly6i          | -3.98872 | 0.00092 | 1.10616 | 0.93557 | 0.5412  | 0.3351  | 0.28942 | 0.51785 |
| Wdr66         | -3.99057 | 4E-11   | 3.61447 | 3.0061  | 2.81963 | 1.66436 | 1.26218 | 1.678   |
| Scn4b         | -3.99482 | 0.00812 | 0.40334 | 0.18607 | 0.02093 | 0.08886 | 0.09402 | 0.06008 |
| Ccdc88c       | -3.99976 | 5E-09   | 8.49282 | 9.53257 | 8.58881 | 4.68982 | 3.78395 | 3.92339 |
| Gm867         | -4.00543 | 1.6E-05 | 6.28367 | 5.63096 | 8.96683 | 4.30572 | 3.12372 | 3.55453 |

|               |          |         |         |         |         |         |         |         |
|---------------|----------|---------|---------|---------|---------|---------|---------|---------|
| Snhg20        | -4.00904 | 0.0004  | 17.5566 | 18.6752 | 11.6814 | 7.57007 | 9.46886 | 7.58878 |
| Cryaa         | -4.01057 | 0.02492 | 0.46208 | 0.26055 | 0.61543 | 0       | 0.16926 | 0.44165 |
| Cyp2s1        | -4.01753 | 1.1E-14 | 19.8287 | 15.441  | 11.7828 | 8.18106 | 5.35252 | 8.51637 |
| Fabp4         | -4.01926 | 0.03191 | 24.6693 | 1.98302 | 0.81462 | 3.0264  | 3.88336 | 2.42192 |
| Sh3bgr        | -4.03008 | 8.7E-06 | 2.07316 | 0.65128 | 0.81145 | 0.53833 | 0.26036 | 0.67938 |
| Sned1         | -4.031   | 3E-14   | 6.99636 | 5.82786 | 4.64723 | 3.05532 | 2.72137 | 3.0433  |
| Irx3os        | -4.03226 | 3.1E-05 | 0.613   | 0.70512 | 0.39189 | 0.2377  | 0.10778 | 0.44194 |
| Espnl         | -4.03365 | 0.00623 | 0.1342  | 0.12769 | 0.09575 | 0.07114 | 0.03687 | 0.04123 |
| Cacnb1        | -4.04127 | 7.3E-11 | 1.67388 | 1.41574 | 1.17418 | 0.81867 | 0.59098 | 0.51219 |
| Erich3        | -4.04443 | 5.2E-06 | 3.41382 | 3.17178 | 3.25739 | 1.68557 | 1.22434 | 2.01202 |
| Mtus2         | -4.05144 | 4.3E-10 | 1.34632 | 0.63174 | 0.63163 | 0.38551 | 0.35804 | 0.40795 |
| Fam161b       | -4.0538  | 9.4E-09 | 1.43205 | 1.29417 | 1.45568 | 0.73691 | 0.56049 | 0.70715 |
| mt-Atp8       | -4.05942 | 0.00103 | 723.537 | 675.953 | 860.24  | 419.389 | 257.485 | 511.698 |
| Guca1b        | -4.06259 | 0.04594 | 0.22451 | 0.28483 | 0.12815 | 0.04534 | 0.13706 | 0.09197 |
| Acaa1b        | -4.0667  | 0.00303 | 1.07073 | 0.39374 | 0.15944 | 0.22565 | 0.23873 | 0.07628 |
| Ccdc57        | -4.0812  | 8.1E-07 | 1.78136 | 1.73368 | 1.56003 | 0.76881 | 0.94748 | 0.61974 |
| Gbp4          | -4.08294 | 0.0004  | 1.99885 | 4.35018 | 4.49422 | 2.2449  | 3.06262 | 1.64755 |
| Rwdd3         | -4.08566 | 0.00024 | 0.68526 | 0.45756 | 0.67936 | 0.20759 | 0.30385 | 0.2807  |
| Ankrd66       | -4.08982 | 1.9E-06 | 1.79771 | 1.92983 | 1.89441 | 0.83785 | 0.70915 | 1.01962 |
| Foxj1         | -4.09359 | 7E-09   | 29.7726 | 26.6832 | 27.2704 | 14.1145 | 10.102  | 17.1168 |
| Avil          | -4.09647 | 0.00016 | 0.77951 | 0.43196 | 0.15343 | 0.228   | 0.39384 | 0.24224 |
| Iqca          | -4.11299 | 3.1E-11 | 2.75422 | 1.89608 | 1.29182 | 0.78909 | 0.57873 | 1.25939 |
| Olig3         | -4.11331 | 0.03214 | 0.22041 | 0.11185 | 0.30194 | 0.08013 | 0.12918 | 0.03611 |
| Gm16201       | -4.11572 | 0.00896 | 0.31596 | 0.33404 | 0.51099 | 0.23929 | 0.28933 | 0.21571 |
| Ccno          | -4.11618 | 0.00011 | 0.92506 | 0.61768 | 0.44465 | 0.20649 | 0.24968 | 0.39887 |
| Egfl8         | -4.11658 | 0.00082 | 0.88174 | 0.70189 | 0.35527 | 0.40853 | 0.34198 | 0.29745 |
| Kcnh3         | -4.11801 | 7E-05   | 1.22361 | 0.51746 | 0.87305 | 0.37068 | 0.41085 | 0.3968  |
| Iqub          | -4.1199  | 9E-08   | 2.17649 | 1.22723 | 1.57078 | 0.65177 | 0.62313 | 1.02477 |
| Ano9          | -4.1223  | 0.00492 | 0.10356 | 0.47297 | 0.26009 | 0.11294 | 0.18208 | 0.08484 |
| Nek5          | -4.12325 | 2E-08   | 4.06716 | 2.74661 | 3.31135 | 1.5855  | 1.43204 | 1.7306  |
| Ucp3          | -4.12942 | 0.00024 | 0.61183 | 0.39427 | 0.13304 | 0.22948 | 0.17075 | 0.04774 |
| Slc7a3        | -4.1299  | 0.00885 | 0.21724 | 0.20415 | 0.02756 | 0.10237 | 0.01768 | 0.05933 |
| Cfap70        | -4.15171 | 4.6E-09 | 2.37076 | 1.79031 | 1.64321 | 0.94905 | 0.63579 | 1.05784 |
| Rapgef11      | -4.15582 | 0.0001  | 0.37005 | 0.36741 | 0.47755 | 0.16572 | 0.22395 | 0.17135 |
| Mgst2         | -4.16394 | 0.00017 | 0.9373  | 0.66758 | 0.95739 | 0.50812 | 0.34333 | 0.34353 |
| Gm7173        | -4.16653 | 8.5E-12 | 1.41105 | 0.80086 | 0.75244 | 0.48933 | 0.36724 | 0.4335  |
| Fam92b        | -4.17602 | 0.00014 | 2.55352 | 1.77208 | 2.91512 | 0.47604 | 0.8634  | 1.28738 |
| Tll9          | -4.17616 | 2.8E-06 | 0.99422 | 0.53109 | 0.65711 | 0.44386 | 0.19167 | 0.30009 |
| Vwc2          | -4.17628 | 0.00155 | 0.22679 | 0.12788 | 0.06904 | 0.03664 | 0.02215 | 0.12387 |
| Zcwpw2        | -4.19276 | 0.00928 | 0.21919 | 0.23835 | 0.14298 | 0.07589 | 0.09176 | 0.10261 |
| Pde6h         | -4.20113 | 0.0079  | 0.24447 | 0.07877 | 0.19935 | 0.04937 | 0.13645 | 0.03815 |
| Pdzd7         | -4.20249 | 1E-06   | 0.44675 | 0.69903 | 0.35701 | 0.37895 | 0.11455 | 0.1464  |
| Zkscan7       | -4.20634 | 2.6E-06 | 1.32227 | 1.27812 | 0.71882 | 0.80114 | 0.7565  | 0.64997 |
| Tekt4         | -4.20853 | 1.7E-08 | 3.39833 | 2.31957 | 2.72249 | 1.37266 | 0.9609  | 1.41647 |
| Acsn1         | -4.20863 | 0.0001  | 1.34012 | 1.09803 | 1.86455 | 0.73583 | 0.39884 | 0.65188 |
| Rbm20         | -4.21279 | 0.0417  | 1.31827 | 0.1479  | 0.23035 | 0.1793  | 0.26608 | 0.17633 |
| 9330158H04Rik | -4.21778 | 0.00152 | 0.39799 | 0.22721 | 0.15902 | 0.10248 | 0.17494 | 0.05706 |
| Trpm5         | -4.22421 | 0.03559 | 0.12848 | 0.07245 | 0.0326  | 0.02595 | 0.03138 | 0.03509 |
| Hdac11        | -4.23112 | 5.6E-13 | 2.06453 | 1.32466 | 1.02944 | 0.60386 | 0.53892 | 0.73876 |
| Gfra4         | -4.2315  | 0.00324 | 0.42188 | 0.28546 | 0.19265 | 0.12781 | 0.06181 | 0.17282 |
| Rnf186        | -4.23167 | 9.2E-09 | 3.94894 | 3.4018  | 4.09071 | 1.77229 | 1.55363 | 1.85724 |
| B3gat1        | -4.23288 | 0.02839 | 0.16573 | 0.09345 | 0.04204 | 0.02231 | 0.02698 | 0.07543 |
| Zcchc12       | -4.23525 | 0.03766 | 0.2003  | 0.23718 | 0.1372  | 0.04854 | 0.0587  | 0.13128 |
| Dydc2         | -4.23562 | 0.00502 | 1.08001 | 1.30493 | 1.40907 | 0.28044 | 1.01726 | 0.2528  |
| Dpf3          | -4.23935 | 0.00077 | 0.21618 | 0.31084 | 0.17276 | 0.07859 | 0.06335 | 0.1594  |
| 1810020O05Rik | -4.24413 | 0.00881 | 0.61066 | 1.47568 | 0.49795 | 0.31713 | 0.31955 | 0.28588 |

|               |          |         |         |         |         |         |         |         |
|---------------|----------|---------|---------|---------|---------|---------|---------|---------|
| Slc28a3       | -4.24476 | 4.9E-05 | 0.30141 | 0.16668 | 0.19851 | 0.09833 | 0.1104  | 0.07598 |
| Cbr2          | -4.24942 | 5.5E-08 | 779.777 | 404.014 | 285.155 | 199.507 | 85.4695 | 307.379 |
| Fhdc1         | -4.24996 | 3.7E-10 | 5.92893 | 4.44783 | 3.29278 | 2.03001 | 1.43005 | 2.54204 |
| Ccdc146       | -4.25075 | 1.5E-07 | 2.821   | 2.49199 | 2.76721 | 1.25341 | 1.13283 | 1.36955 |
| Ttc6          | -4.25696 | 1.9E-09 | 1.18922 | 0.80928 | 0.67101 | 0.30643 | 0.41057 | 0.40315 |
| A930001A20Rik | -4.26001 | 0.02434 | 0.53492 | 0.45243 | 0.07633 | 0.20256 | 0       | 0.21912 |
| Armc3         | -4.27075 | 1.9E-08 | 1.32327 | 1.0919  | 1.17904 | 0.62575 | 0.35466 | 0.58171 |
| Atp7b         | -4.27173 | 1.9E-14 | 9.29523 | 5.42722 | 4.27986 | 2.62024 | 2.44817 | 2.94484 |
| Gm10044       | -4.28166 | 4E-07   | 1.179   | 0.76255 | 0.63339 | 0.33616 | 0.33025 | 0.25568 |
| Dqx1          | -4.28483 | 2.3E-06 | 1.01516 | 1.03936 | 1.09792 | 0.46939 | 0.45013 | 0.4815  |
| Ak7           | -4.28602 | 5.8E-14 | 8.00274 | 5.14512 | 5.12424 | 2.84482 | 1.77397 | 3.50798 |
| Gpr156        | -4.30449 | 0.01916 | 0.11963 | 0.21923 | 0.04552 | 0.0604  | 0.05843 | 0.03267 |
| 1700040L02Rik | -4.30598 | 2.1E-06 | 2.38838 | 0.97942 | 1.32198 | 0.65776 | 0.58324 | 0.65223 |
| Efnb3         | -4.30616 | 0.00148 | 0.25826 | 0.41259 | 0.13104 | 0.08693 | 0.16818 | 0.07053 |
| Ppp2r2b       | -4.30992 | 4.2E-05 | 0.61885 | 0.32956 | 0.20933 | 0.1111  | 0.15112 | 0.20655 |
| Slc6a15       | -4.31535 | 1E-06   | 0.97781 | 0.44532 | 0.22898 | 0.31901 | 0.18368 | 0.12324 |
| 1700007G11Rik | -4.31607 | 6.1E-05 | 1.70312 | 2.18738 | 2.52037 | 0.99367 | 0.50832 | 1.49865 |
| mt-Nd4l       | -4.31684 | 0.00265 | 676.267 | 586.541 | 854.886 | 347.318 | 229.578 | 420.503 |
| Ttc29         | -4.32061 | 2.2E-08 | 2.86317 | 2.02892 | 2.32631 | 1.17212 | 0.69918 | 1.39472 |
| BC049715      | -4.32669 | 0.0038  | 0.50146 | 0.36354 | 1.02227 | 0.41234 | 0.23616 | 0.23476 |
| 4930412C18Rik | -4.33151 | 2.9E-06 | 0.31199 | 0.22618 | 0.3392  | 0.14402 | 0.08707 | 0.13388 |
| Sgcg          | -4.34289 | 0.00611 | 1.65361 | 0.20568 | 0.27761 | 0.26521 | 0.3563  | 0.31876 |
| Ankmy1        | -4.34621 | 0.00332 | 0.32042 | 0.33477 | 0.62399 | 0.23981 | 0.15189 | 0.1853  |
| Cys1          | -4.34672 | 3.7E-12 | 3.65903 | 3.73705 | 1.57629 | 1.75682 | 0.70808 | 1.18776 |
| Fam47e        | -4.35786 | 7E-07   | 2.98687 | 2.48963 | 3.85459 | 1.54742 | 1.07822 | 1.80866 |
| Kcng2         | -4.36029 | 0.03814 | 0.73339 | 0.18092 | 0.06977 | 0.09257 | 0.11193 | 0.15021 |
| Cfap58        | -4.36104 | 2.5E-09 | 2.62135 | 0.96998 | 1.05986 | 0.59559 | 0.54011 | 0.73822 |
| Zfr2          | -4.36688 | 9.3E-11 | 0.68354 | 0.5678  | 0.52951 | 0.29582 | 0.25038 | 0.19    |
| BC030500      | -4.36876 | 0.03508 | 0.20653 | 0.17468 | 0.35366 | 0.09385 | 0.11348 | 0.0423  |
| Myom1         | -4.37126 | 1E-06   | 7.81007 | 2.81931 | 2.18764 | 1.66839 | 1.84035 | 1.76782 |
| Slc4a3        | -4.37426 | 9.9E-06 | 1.75261 | 1.5003  | 1.28536 | 0.65643 | 0.77815 | 0.50472 |
| Cfap57        | -4.376   | 4.8E-13 | 2.68105 | 1.97934 | 1.50441 | 0.9361  | 0.59922 | 1.04239 |
| Zdhhc1        | -4.37701 | 4.1E-12 | 9.87199 | 9.24677 | 7.26613 | 3.92193 | 4.01258 | 3.44082 |
| Morn1         | -4.38217 | 4E-10   | 2.2623  | 1.43059 | 1.13443 | 0.51241 | 0.77446 | 0.67554 |
| Gm20878       | -4.38497 | 0.00853 | 1.94085 | 1.64154 | 0.67142 | 0.35634 | 1.33568 | 0.81912 |
| mt-Nd5        | -4.39267 | 0.00138 | 755.939 | 633.854 | 966.055 | 374.758 | 312.079 | 467.886 |
| March4        | -4.39441 | 6.1E-10 | 2.06628 | 1.57795 | 1.92374 | 0.88729 | 0.60256 | 1.00254 |
| 4933439C10Rik | -4.39602 | 0.0003  | 1.10594 | 1.16923 | 0.83551 | 0.73905 | 0.84595 | 0.4397  |
| Cfap99        | -4.39754 | 5.4E-07 | 1.59185 | 1.12803 | 1.81726 | 0.5474  | 0.59885 | 0.5992  |
| Mycbpap       | -4.40139 | 1.5E-09 | 2.85504 | 2.49457 | 2.18186 | 1.12938 | 0.82972 | 1.31448 |
| Gabre         | -4.41038 | 4E-10   | 1.65858 | 1.10919 | 0.9247  | 0.45571 | 0.63579 | 0.395   |
| Acss1         | -4.41242 | 1.1E-14 | 8.5629  | 6.41893 | 4.8751  | 3.12359 | 2.20451 | 3.136   |
| Spata17       | -4.41822 | 3.1E-09 | 1.55942 | 1.4266  | 1.34427 | 0.63631 | 0.53624 | 0.65182 |
| mt-Nd4        | -4.42182 | 0.00111 | 1161.41 | 939.915 | 1316.26 | 529.504 | 414.154 | 677.859 |
| Asb11         | -4.42429 | 0.00975 | 0.3529  | 0.13567 | 0.18313 | 0.05831 | 0.07051 | 0.13142 |
| 2010300C02Rik | -4.42473 | 1.7E-12 | 5.1293  | 4.23172 | 4.21195 | 1.78832 | 1.8327  | 2.28542 |
| Sult1d1       | -4.42967 | 2.8E-06 | 6.50024 | 1.5708  | 2.03539 | 1.17026 | 1.14289 | 1.61282 |
| Dnah11        | -4.42995 | 3.3E-11 | 3.97367 | 2.96547 | 3.02184 | 1.64971 | 1.1848  | 1.54233 |
| Cdr1          | -4.43749 | 9.8E-05 | 0.67131 | 0.26719 | 0.31556 | 0.1914  | 0.14465 | 0.12941 |
| Grip1         | -4.44279 | 1.7E-08 | 0.5113  | 0.37348 | 0.35818 | 0.11969 | 0.20432 | 0.1904  |
| Nek11         | -4.44542 | 1.6E-06 | 1.3122  | 0.96428 | 1.05598 | 0.45617 | 0.40974 | 0.56395 |
| Calml3        | -4.44542 | 0.00138 | 3.8431  | 1.35434 | 1.82804 | 1.12542 | 0.46924 | 1.31187 |
| Fndc5         | -4.45024 | 0.01316 | 3.90077 | 0.83878 | 0.37738 | 0.50072 | 0.31483 | 0.97497 |
| mt-Nd6        | -4.45246 | 0.00132 | 675.617 | 569.49  | 826.738 | 285.336 | 292.021 | 413.794 |
| Ccl28         | -4.4532  | 0.00037 | 0.34236 | 0.22752 | 0.19542 | 0.11853 | 0.10749 | 0.0601  |
| Acrbp         | -4.4603  | 1.6E-05 | 1.03128 | 1.29657 | 0.98639 | 0.38841 | 0.46964 | 0.27401 |



|               |          |         |         |         |         |         |         |         |
|---------------|----------|---------|---------|---------|---------|---------|---------|---------|
| Dnaaf1        | -4.46311 | 3.2E-09 | 2.26644 | 1.56092 | 1.62635 | 0.66698 | 0.71159 | 0.84882 |
| Cyp4f15       | -4.46405 | 1.1E-09 | 1.96124 | 1.15099 | 0.95955 | 0.72752 | 0.55712 | 0.26233 |
| Frem2         | -4.4657  | 4.5E-06 | 0.33076 | 0.1865  | 0.236   | 0.09603 | 0.06563 | 0.15807 |
| Ubap1l        | -4.46804 | 0.02158 | 0.27069 | 0.13082 | 0.13244 | 0.04686 | 0.11332 | 0.03168 |
| Syt10         | -4.47125 | 2.5E-07 | 1.33665 | 1.17238 | 0.7347  | 0.29994 | 0.47148 | 0.52725 |
| Alpk3         | -4.4755  | 0.00117 | 0.73694 | 0.35959 | 0.21032 | 0.08586 | 0.19726 | 0.20899 |
| Shank2        | -4.47976 | 2.5E-11 | 2.62104 | 2.10204 | 2.31435 | 1.06897 | 0.94454 | 1.09797 |
| Gm16194       | -4.48181 | 1.7E-05 | 1.86912 | 1.79165 | 1.28028 | 0.90597 | 0.18257 | 0.81669 |
| Plekhd1       | -4.48646 | 6.3E-09 | 2.713   | 3.05948 | 2.25008 | 0.78676 | 1.05322 | 1.59574 |
| 1700019D03Rik | -4.50554 | 0.01368 | 0.40079 | 0.23193 | 0.04816 | 0.25561 | 0.10817 | 0.06913 |
| C430049B03Rik | -4.50973 | 0.01033 | 0.45385 | 0.52781 | 0.58288 | 0.20624 | 0.12468 | 0.32534 |
| Lrrc6         | -4.51313 | 2.7E-08 | 2.93648 | 2.18707 | 2.40165 | 1.06219 | 0.70638 | 1.43626 |
| Gm31105       | -4.51777 | 0.02211 | 0.79771 | 0.67469 | 0.75889 | 0.32221 | 0       | 0.32676 |
| Mfsd4a        | -4.52062 | 0.00425 | 5.88414 | 4.579   | 1.61043 | 5.79809 | 5.68861 | 6.33032 |
| Capn13        | -4.53558 | 0.0055  | 0.17471 | 0.11821 | 0.35901 | 0.08468 | 0.10239 | 0.05725 |
| mt-Co2        | -4.53691 | 0.01657 | 1925.97 | 1798.59 | 2727.52 | 1282.61 | 930.134 | 1488.48 |
| Gm13421       | -4.54949 | 0.01546 | 0.34124 | 0.67343 | 0.51941 | 0.20675 | 0.16666 | 0.18637 |
| Vtcn1         | -4.55978 | 1.4E-05 | 1.67208 | 0.70711 | 1.19304 | 0.48544 | 0.45936 | 0.5137  |
| Gm45193       | -4.56085 | 0.01947 | 0.76507 | 1.49327 | 0.67185 | 0       | 0.6036  | 0.3375  |
| Plp1          | -4.56313 | 3.4E-07 | 0.62526 | 0.32008 | 0.28176 | 0.1296  | 0.24109 | 0.08088 |
| Atp10b        | -4.58358 | 0.00086 | 0.29776 | 0.16527 | 0.26557 | 0.14658 | 0.05453 | 0.06861 |
| Hydin         | -4.58373 | 9.3E-16 | 5.65131 | 3.20365 | 2.94252 | 1.57702 | 1.25391 | 1.94571 |
| 2810030D12Rik | -4.58391 | 0.02379 | 0.75878 | 0.8022  | 0.10828 | 0.11493 | 0.13897 | 0.38852 |
| Ccdc151       | -4.59471 | 1.2E-08 | 1.85291 | 1.81299 | 2.19824 | 0.72642 | 0.79849 | 0.98224 |
| Cerkl         | -4.60322 | 0.00455 | 0.22471 | 0.33626 | 0.31573 | 0.14662 | 0.12663 | 0.09913 |
| Nwd1          | -4.60868 | 0.00016 | 1.27383 | 1.27327 | 1.83319 | 0.72502 | 0.67304 | 0.61983 |
| Gm26704       | -4.61361 | 0.02814 | 0.23506 | 0.11361 | 0.23001 | 0.04069 | 0.123   | 0.02751 |
| Cyp1a1        | -4.62862 | 0.00169 | 0.85209 | 1.16418 | 0.14965 | 0.17871 | 0.31212 | 0.32219 |
| Ddo           | -4.63004 | 2.4E-12 | 2.21052 | 1.6792  | 1.60058 | 0.79367 | 0.75723 | 0.6875  |
| Trim66        | -4.63552 | 3.1E-05 | 0.11727 | 0.12971 | 0.09269 | 0.04373 | 0.03965 | 0.04434 |
| Ttc41         | -4.63916 | 1.6E-05 | 0.82569 | 0.74824 | 0.76307 | 0.26205 | 0.51848 | 0.14495 |
| 6430531B16Rik | -4.64268 | 0.00435 | 0.68847 | 1.24224 | 0.73357 | 0.3059  | 0.23537 | 0.48883 |
| Dsc2          | -4.64707 | 1.3E-05 | 0.51926 | 0.19031 | 0.25687 | 0.09438 | 0.11412 | 0.15598 |
| Kcnk2         | -4.65951 | 1.8E-09 | 4.58259 | 3.2351  | 1.35007 | 1.28749 | 0.71746 | 1.43814 |
| Gm4258        | -4.66369 | 0.00037 | 2.70764 | 2.59541 | 1.23642 | 0.87494 | 0.92568 | 0.73942 |
| Lrrc45        | -4.66611 | 4.1E-08 | 9.65244 | 10.2752 | 9.24606 | 3.94925 | 4.36877 | 3.95391 |
| Hs6st3        | -4.67764 | 0.0001  | 0.90497 | 0.9841  | 0.95933 | 0.31332 | 0.28413 | 0.52957 |
| Atp2c2        | -4.68178 | 2.8E-06 | 2.80646 | 2.39763 | 2.78316 | 1.28817 | 0.91378 | 1.20767 |
| Aim1l         | -4.68337 | 8.3E-07 | 0.88154 | 0.80123 | 1.00637 | 0.43845 | 0.38556 | 0.45272 |
| E230025N22Rik | -4.68867 | 0.01694 | 0.18123 | 0.22992 | 0.31033 | 0.0549  | 0.09957 | 0.11135 |
| Adgb          | -4.68926 | 4.4E-12 | 3.59922 | 2.23321 | 2.94695 | 1.29591 | 1.09145 | 1.28099 |
| Diras2        | -4.69468 | 1.1E-16 | 2.14269 | 1.88332 | 1.00722 | 0.80184 | 0.41552 | 0.6884  |
| Six4          | -4.69477 | 2.3E-16 | 1.91005 | 0.99634 | 0.88374 | 0.49452 | 0.35136 | 0.61352 |
| Rab36         | -4.69715 | 2.5E-08 | 1.3904  | 1.47623 | 1.58729 | 0.61837 | 0.7477  | 0.49684 |
| Nkx6-2        | -4.69842 | 0.00016 | 0.76634 | 0.68866 | 0.21871 | 0.17412 | 0.17544 | 0.27467 |
| 4732471J01Rik | -4.69913 | 0.00211 | 0.6747  | 0.67765 | 0.74617 | 0.29382 | 0.4016  | 0.15546 |
| Bpifb5        | -4.70277 | 0.01451 | 0.27898 | 0.47191 | 0.44588 | 0.20283 | 0.04088 | 0.22856 |
| mt-Nd2        | -4.71015 | 0.00046 | 855.3   | 687.154 | 976.616 | 353.471 | 261.4   | 528.488 |
| Gm13111       | -4.71721 | 4.9E-09 | 0.90255 | 0.95965 | 0.47102 | 0.28123 | 0.2267  | 0.38027 |
| Zmynd10       | -4.72    | 3.9E-11 | 4.16146 | 2.7577  | 3.13451 | 1.45563 | 1.25718 | 1.15987 |
| Gm14317       | -4.72047 | 0.01657 | 0.24956 | 0.68598 | 0.14245 | 0.1512  | 0.18282 | 0.05111 |
| Cacna2d3      | -4.74092 | 0.01526 | 0.24719 | 0.12544 | 0.08466 | 0.02995 | 0.01811 | 0.12151 |
| Hpcal4        | -4.74968 | 5.1E-05 | 0.30794 | 0.23151 | 0.05859 | 0.11402 | 0.02507 | 0.07008 |
| Gm28042       | -4.75728 | 0.00268 | 0.59859 | 0.49139 | 0.60296 | 0.35201 | 0.21926 | 0.12981 |
| Endog         | -4.76407 | 0.00024 | 7.56134 | 6.90397 | 9.22062 | 4.37305 | 3.33622 | 3.5901  |
| Rhpn1         | -4.76882 | 4.6E-05 | 0.74681 | 0.38447 | 0.88963 | 0.37378 | 0.1903  | 0.23941 |

|               |          |         |         |         |         |         |         |         |
|---------------|----------|---------|---------|---------|---------|---------|---------|---------|
| C230034O21Rik | -4.77464 | 8.5E-07 | 1.32047 | 1.17131 | 0.77211 | 0.72199 | 0.23594 | 0.44855 |
| Upp2          | -4.78344 | 2.3E-08 | 0.38851 | 0.3505  | 0.44352 | 0.18831 | 0.12333 | 0.14853 |
| Efhb          | -4.78438 | 1.3E-07 | 1.57893 | 1.88702 | 1.52822 | 0.6239  | 0.52806 | 0.84362 |
| Tsix          | -4.78637 | 0.01259 | 0.43587 | 0.17797 | 0.29169 | 0.09106 | 0.14314 | 0.08619 |
| Cracr2a       | -4.78638 | 1.2E-08 | 3.5489  | 4.18644 | 4.19805 | 1.83193 | 1.55652 | 1.69283 |
| Necab2        | -4.79007 | 0.04377 | 0.30504 | 0.07371 | 0.0995  | 0.07921 | 0.03192 | 0.0357  |
| Rn18s-rs5     | -4.8034  | 0.00239 | 3926.49 | 5207.57 | 4574.95 | 3844.57 | 3965.5  | 3654.36 |
| Plin4         | -4.80405 | 5.6E-06 | 8.96459 | 2.25992 | 1.66055 | 1.12078 | 1.63316 | 1.47663 |
| Spag8         | -4.80455 | 3.7E-06 | 2.36313 | 1.76629 | 3.19967 | 1.03221 | 0.80521 | 1.30568 |
| Tnfrsf25      | -4.81492 | 8.5E-07 | 1.04294 | 1.18744 | 0.36635 | 0.29165 | 0.35264 | 0.29577 |
| Gm32742       | -4.83053 | 0.0047  | 0.13943 | 0.127   | 0.31835 | 0.09748 | 0.07857 | 0.07908 |
| Gm44276       | -4.83662 | 0.01371 | 0.13853 | 0.05207 | 0.07029 | 0.0373  | 0.05638 | 0       |
| Dnah7a        | -4.83821 | 1.2E-06 | 1.47376 | 0.80477 | 1.30676 | 0.63719 | 0.47694 | 0.35753 |
| Kcnp2         | -4.83847 | 0.00032 | 0.3416  | 0.33336 | 0.06    | 0.0796  | 0.05775 | 0.12916 |
| Lhb           | -4.85345 | 0.00018 | 1.07773 | 1.82305 | 1.07655 | 0.32649 | 0.29608 | 0.88294 |
| Gm42902       | -4.85346 | 0.02942 | 0.96581 | 0.70017 | 0.94506 | 0.25078 | 0.20216 | 0.11303 |
| Actc1         | -4.85703 | 0.0006  | 81.4587 | 13.0822 | 7.34669 | 12.8944 | 6.07927 | 9.52704 |
| Colq          | -4.86686 | 7.2E-08 | 1.03274 | 0.79222 | 0.46611 | 0.422   | 0.15835 | 0.25579 |
| Got1l1        | -4.86796 | 0.02763 | 0.45117 | 0.1272  | 0.17169 | 0.12149 | 0.03673 | 0.08214 |
| Fam13a        | -4.86871 | 2.2E-15 | 5.91789 | 3.45484 | 2.90009 | 1.53916 | 1.08914 | 1.91566 |
| Dnah7c        | -4.86981 | 2.2E-07 | 1.56541 | 1.36691 | 1.53061 | 0.67621 | 0.49908 | 0.67686 |
| Itpka         | -4.87023 | 6.1E-12 | 2.21059 | 2.12464 | 1.43388 | 0.48704 | 0.51528 | 1.19364 |
| Myo18b        | -4.88776 | 0.01765 | 1.11845 | 0.32495 | 0.17544 | 0.12932 | 0.20641 | 0.18886 |
| Itgb1bp2      | -4.89599 | 0.0007  | 0.91388 | 0.5153  | 0.17388 | 0.12305 | 0.22317 | 0.20797 |
| Col20a1       | -4.90024 | 7.1E-07 | 0.67528 | 1.01332 | 0.5471  | 0.30356 | 0.39896 | 0.10708 |
| Dnah7b        | -4.90617 | 1.9E-08 | 1.61829 | 1.10581 | 1.28382 | 0.57057 | 0.59278 | 0.47564 |
| Nptx2         | -4.91241 | 0.0035  | 0.4322  | 0.2437  | 0.08223 | 0.04364 | 0.07916 | 0.14753 |
| Cfap61        | -4.91485 | 6.1E-11 | 1.30039 | 0.95417 | 1.06179 | 0.51134 | 0.33438 | 0.46565 |
| Pla2g4b       | -4.93337 | 0.03591 | 0.59524 | 0.39745 | 0.39341 | 0.3037  | 0.30984 | 0.24383 |
| Snx32         | -4.95022 | 9.5E-06 | 2.21424 | 2.06005 | 2.52779 | 1.14034 | 0.93273 | 0.58956 |
| Vwa3b         | -4.97127 | 6.3E-08 | 1.67888 | 0.77453 | 1.37454 | 0.44181 | 0.53421 | 0.51405 |
| Gm973         | -4.98325 | 1E-08   | 2.29843 | 1.83128 | 1.99645 | 0.7972  | 0.59788 | 0.92786 |
| Ccdc170       | -4.98411 | 1.4E-08 | 3.80573 | 4.42079 | 4.48213 | 1.82423 | 1.53519 | 1.81547 |
| Vpreb3        | -4.98641 | 3.5E-11 | 9.67604 | 6.11539 | 4.61271 | 2.89906 | 1.63583 | 2.78757 |
| Ccdc67        | -5.00241 | 4E-08   | 0.82758 | 0.74662 | 0.91328 | 0.35099 | 0.28293 | 0.2938  |
| Ccdc173       | -5.0029  | 1.1E-06 | 1.14261 | 1.4798  | 1.34518 | 0.56248 | 0.39238 | 0.61431 |
| Zbbx          | -5.00453 | 9.7E-10 | 2.61911 | 2.16427 | 2.88688 | 1.11263 | 0.92629 | 1.0112  |
| Lrrc26        | -5.00731 | 3E-06   | 5.52631 | 1.68785 | 3.59255 | 0.93008 | 0.9559  | 2.26373 |
| Spf2          | -5.01479 | 5.3E-13 | 3.29759 | 2.22812 | 2.55526 | 1.08269 | 1.0122  | 1.02629 |
| Crocc         | -5.01731 | 1.1E-05 | 1.73482 | 2.22428 | 2.30845 | 0.83686 | 0.98759 | 0.71516 |
| Unc79         | -5.01988 | 7.6E-11 | 1.20947 | 0.40764 | 0.4464  | 0.25345 | 0.22651 | 0.23095 |
| Casc1         | -5.03069 | 2E-10   | 1.6848  | 1.16727 | 1.14584 | 0.48325 | 0.4924  | 0.52128 |
| Kif27         | -5.031   | 9.6E-10 | 3.1524  | 3.09907 | 2.59393 | 1.42628 | 0.98975 | 1.27454 |
| Wdr63         | -5.0318  | 3.6E-13 | 4.24826 | 3.26646 | 3.40118 | 1.68811 | 0.97005 | 1.53681 |
| Lrrc31        | -5.04573 | 0.00148 | 0.14627 | 0.19441 | 0.09542 | 0.07596 | 0.04593 | 0.03424 |
| Slc2a4        | -5.05107 | 5.1E-05 | 2.52111 | 0.42202 | 0.4497  | 0.30232 | 0.32706 | 0.45181 |
| Dnah9         | -5.05891 | 2.1E-10 | 5.74976 | 4.28181 | 5.0668  | 2.20679 | 1.63623 | 2.13475 |
| Lrrc74b       | -5.06934 | 2E-12   | 3.59232 | 2.19543 | 2.32831 | 0.98295 | 0.86592 | 1.13924 |
| Trpm3         | -5.07829 | 7.1E-06 | 0.48722 | 0.24917 | 0.19403 | 0.09611 | 0.14111 | 0.07426 |
| Efcab6        | -5.08173 | 6.3E-09 | 1.5394  | 1.07294 | 1.12277 | 0.56998 | 0.40724 | 0.40871 |
| Ulk4          | -5.08198 | 6.7E-09 | 2.96474 | 1.99875 | 2.26864 | 0.85909 | 0.78694 | 1.12644 |
| Sptbn5        | -5.09102 | 5.6E-05 | 0.54135 | 0.6305  | 0.4863  | 0.17206 | 0.26656 | 0.17449 |
| D130043K22Rik | -5.09117 | 3.1E-11 | 1.21183 | 0.61497 | 0.47432 | 0.33565 | 0.15219 | 0.29784 |
| 1700029J07Rik | -5.09437 | 5.8E-08 | 2.56679 | 2.28372 | 2.51165 | 0.86847 | 0.83031 | 1.14701 |
| Stpg1         | -5.10366 | 3.5E-06 | 0.53834 | 0.65768 | 0.17071 | 0.19932 | 0.13146 | 0.09801 |
| Adcy1         | -5.1038  | 5.8E-08 | 0.43765 | 0.15423 | 0.19152 | 0.07955 | 0.13359 | 0.04781 |

|               |          |         |         |         |         |         |         |         |
|---------------|----------|---------|---------|---------|---------|---------|---------|---------|
| Rp1           | -5.10553 | 1.7E-11 | 2.27027 | 1.49345 | 1.54997 | 0.69225 | 0.65223 | 0.62606 |
| Dixdc1        | -5.10837 | 3.5E-20 | 2.05191 | 1.89042 | 1.06666 | 0.66601 | 0.47647 | 0.63039 |
| Rsph10b       | -5.10902 | 9.9E-08 | 4.5065  | 3.61222 | 4.57302 | 1.62397 | 1.6615  | 1.54436 |
| Cmya5         | -5.12127 | 1.6E-05 | 4.4397  | 0.70407 | 0.48396 | 0.52304 | 0.63808 | 0.46729 |
| Esyt3         | -5.13618 | 1.8E-11 | 1.43483 | 1.26342 | 0.96485 | 0.41681 | 0.48957 | 0.45087 |
| BC048546      | -5.16388 | 0.00041 | 8.77472 | 4.11517 | 5.2289  | 2.1957  | 1.63473 | 2.92773 |
| H2-Q5         | -5.16392 | 0.00038 | 5.10939 | 14.6152 | 12.0591 | 6.53922 | 5.08894 | 2.82196 |
| Tle2          | -5.1668  | 1.1E-13 | 3.2888  | 4.47044 | 2.43038 | 1.24539 | 1.33375 | 1.07053 |
| Cadm2         | -5.16889 | 0.00041 | 0.2421  | 0.09451 | 0.09567 | 0.02821 | 0.06139 | 0.0534  |
| Mfsd4b1       | -5.1694  | 5.2E-06 | 0.97061 | 0.82092 | 1.41372 | 0.36501 | 0.41683 | 0.4113  |
| Wdr31         | -5.20007 | 1.2E-09 | 1.34944 | 0.94567 | 0.96833 | 0.45552 | 0.3107  | 0.50539 |
| Gm26660       | -5.21506 | 0.00252 | 0.39509 | 0.57719 | 0.12301 | 0.10881 | 0.15788 | 0.08828 |
| Defb23        | -5.2244  | 0.0268  | 0.43912 | 0.3714  | 1.16971 | 0.17737 | 0.42893 | 0       |
| Tmem191c      | -5.22485 | 3.1E-05 | 0.78578 | 1.20261 | 1.06792 | 0.24938 | 0.52083 | 0.39852 |
| Trp73         | -5.22707 | 1.1E-16 | 1.68349 | 1.49366 | 1.43199 | 0.56    | 0.5562  | 0.54087 |
| Catip         | -5.23483 | 8.8E-07 | 4.17236 | 3.77349 | 4.05579 | 1.47673 | 1.51319 | 1.52298 |
| Gm1661        | -5.23609 | 0.00025 | 0.77876 | 0.50184 | 1.60874 | 0.31456 | 0.43468 | 0.42534 |
| Gm10069       | -5.2446  | 1.9E-05 | 0.29261 | 0.45962 | 0.14316 | 0.15196 | 0.06125 | 0.08562 |
| Syngap1       | -5.25673 | 9.9E-09 | 4.07769 | 4.01796 | 4.76266 | 1.74491 | 1.67604 | 1.58765 |
| Tas1r1        | -5.25948 | 4.2E-05 | 0.38283 | 0.48569 | 0.61915 | 0.11598 | 0.21035 | 0.20909 |
| 1700003E16Rik | -5.27403 | 1.7E-06 | 1.97398 | 1.70434 | 2.86383 | 0.897   | 0.93395 | 0.70752 |
| Srl           | -5.27461 | 0.00697 | 3.85933 | 0.26113 | 0.2154  | 0.45727 | 0.30158 | 0.42157 |
| Dnah5         | -5.27464 | 6.3E-13 | 10.5304 | 6.7169  | 7.61856 | 3.33526 | 2.6243  | 3.24594 |
| Kif6          | -5.28842 | 5.9E-11 | 1.62479 | 1.15589 | 1.33481 | 0.51522 | 0.44498 | 0.53494 |
| Corin         | -5.29596 | 0.00152 | 1.77601 | 0.41487 | 0.15448 | 0.16397 | 0.19826 | 0.30486 |
| Uox           | -5.31552 | 0.00298 | 0.19899 | 0.1683  | 0.19472 | 0.08612 | 0.02083 | 0.06987 |
| 4921536K21Rik | -5.32531 | 1.9E-05 | 0.42319 | 0.53688 | 0.32207 | 0.17093 | 0.10334 | 0.14446 |
| Ankub1        | -5.327   | 0.00029 | 0.64763 | 0.67556 | 0.86256 | 0.34007 | 0.25304 | 0.22992 |
| Dnaic1        | -5.32737 | 1.6E-07 | 2.65936 | 1.41619 | 2.32381 | 0.93493 | 0.48104 | 0.96831 |
| Lrrc2         | -5.32785 | 0.00454 | 0.77796 | 0.10281 | 0.02775 | 0.10311 | 0.03562 | 0.1195  |
| Adgrb1        | -5.33113 | 0.01917 | 0.0664  | 0.04493 | 0.0758  | 0.01609 | 0       | 0.04352 |
| Prob1         | -5.34977 | 5.1E-10 | 6.25984 | 4.21977 | 5.2477  | 1.8907  | 1.71116 | 2.23507 |
| 1700095J03Rik | -5.35513 | 0.00303 | 1.21245 | 0.34182 | 0.80741 | 0.42852 | 0.25907 | 0.12416 |
| D630024D03Rik | -5.36271 | 5.5E-07 | 1.22405 | 0.73949 | 0.86505 | 0.28253 | 0.42702 | 0.19101 |
| Slc27a2       | -5.36644 | 6.4E-06 | 0.75425 | 0.2881  | 0.38887 | 0.11793 | 0.21389 | 0.13953 |
| Cnksr2        | -5.37279 | 3.5E-12 | 0.52238 | 0.33345 | 0.27005 | 0.13138 | 0.09387 | 0.14535 |
| mt-Nd3        | -5.37928 | 0.0052  | 566.923 | 456.851 | 446.45  | 201.8   | 195.548 | 335.87  |
| Trim55        | -5.38388 | 0.01725 | 0.68701 | 0.11621 | 0.15686 | 0.14569 | 0.05033 | 0.08443 |
| Apol7a        | -5.40164 | 0.04637 | 0.24139 | 0.07656 | 0.34447 | 0.09141 | 0.02211 | 0.1236  |
| Caps2         | -5.41099 | 5.5E-06 | 0.50713 | 0.31605 | 0.51801 | 0.16172 | 0.15643 | 0.10934 |
| Myo1h         | -5.43447 | 2.2E-09 | 1.38694 | 1.26429 | 1.17871 | 0.45751 | 0.53061 | 0.42925 |
| Txndc2        | -5.43708 | 0.00269 | 0.28859 | 0.36612 | 0.32945 | 0.08742 | 0.14094 | 0.07881 |
| Rsph14        | -5.43875 | 2.3E-10 | 1.06136 | 0.76944 | 0.86547 | 0.38584 | 0.22216 | 0.27328 |
| Nek10         | -5.44066 | 2.6E-08 | 1.15031 | 0.77022 | 1.14905 | 0.37752 | 0.39795 | 0.32722 |
| Myb           | -5.44733 | 1.3E-12 | 3.52954 | 2.42094 | 2.99744 | 1.14748 | 0.88293 | 0.93448 |
| Dcdc2a        | -5.4492  | 1.2E-12 | 1.21284 | 0.63413 | 0.44055 | 0.22045 | 0.16155 | 0.36132 |
| Ttc21a        | -5.46201 | 9.2E-09 | 9.40838 | 8.58831 | 11.7857 | 3.31752 | 2.91845 | 3.74978 |
| Crb1          | -5.48176 | 0.00013 | 0.10861 | 0.05653 | 0.08584 | 0.01519 | 0.03672 | 0.02738 |
| Fbxl13        | -5.50319 | 8.4E-07 | 1.07179 | 0.55275 | 1.04451 | 0.34845 | 0.19151 | 0.40691 |
| Tmem88b       | -5.50358 | 1.4E-05 | 0.3684  | 0.46738 | 0.1502  | 0.17538 | 0.03856 | 0.08623 |
| Ubxn11        | -5.50385 | 1.8E-05 | 2.42694 | 2.42735 | 3.69414 | 1.12033 | 1.26997 | 0.88368 |
| 2010001K21Rik | -5.5165  | 0.00142 | 2.8158  | 2.08386 | 2.20999 | 0.85302 | 0.25785 | 1.44179 |
| Dnah6         | -5.52474 | 1E-13   | 12.1489 | 10.0712 | 10.1855 | 4.43237 | 3.24792 | 3.90893 |
| Sema6c        | -5.53137 | 6.3E-09 | 0.55403 | 0.54668 | 0.40408 | 0.22378 | 0.14657 | 0.11347 |
| Mgat3         | -5.54666 | 5.3E-13 | 7.16604 | 4.75268 | 5.78913 | 2.25393 | 1.90771 | 2.10131 |
| H2-M5         | -5.55716 | 0.00033 | 0.20365 | 0.3732  | 0.38748 | 0.10282 | 0.09946 | 0.11123 |



|               |          |         |         |         |         |         |         |         |
|---------------|----------|---------|---------|---------|---------|---------|---------|---------|
| RP23-478P10.3 | -5.56714 | 0.00047 | 2.38084 | 2.37979 | 1.23544 | 0.65569 | 0.63425 | 0.53196 |
| Als2cr12      | -5.56894 | 0.00379 | 0.18827 | 0.09099 | 0.12282 | 0.06518 | 0.0197  | 0.04407 |
| Erb4          | -5.56894 | 0.02404 | 0.23657 | 0.01876 | 0.03376 | 0.0224  | 0.02166 | 0.03634 |
| Gm44246       | -5.57777 | 2.4E-06 | 2.56339 | 3.8797  | 1.5402  | 0.40871 | 1.08722 | 1.1053  |
| Kcnj11        | -5.58189 | 0.0292  | 0.79489 | 0.2311  | 0.11343 | 0.10535 | 0.09099 | 0.1221  |
| Panx2         | -5.58207 | 0.01961 | 0.22841 | 0.06439 | 0.02897 | 0.06151 | 0.01859 | 0       |
| Fsd2          | -5.60402 | 4.5E-09 | 2.63584 | 0.83358 | 0.86348 | 0.45827 | 0.30224 | 0.58211 |
| Adra2a        | -5.6043  | 0.00228 | 0.64881 | 0.44713 | 1.53623 | 0.48046 | 0.17604 | 0.45279 |
| Pclo          | -5.61279 | 2.7E-07 | 0.52874 | 0.28208 | 0.29716 | 0.15771 | 0.12812 | 0.08997 |
| Pisd-ps1      | -5.61538 | 2.7E-07 | 20.638  | 25.7213 | 21.0086 | 8.94509 | 8.91162 | 5.49398 |
| Prr36         | -5.61815 | 1.1E-05 | 0.65361 | 0.64758 | 0.46902 | 0.27155 | 0.24626 | 0.22949 |
| Slc4a5        | -5.62547 | 2.3E-14 | 4.61094 | 2.94153 | 1.86841 | 1.16324 | 0.73784 | 1.07009 |
| Dnah1         | -5.63744 | 1.4E-08 | 2.42678 | 2.12454 | 2.44639 | 0.88134 | 0.57182 | 1.10453 |
| Gm26671       | -5.65075 | 9.9E-08 | 1.3624  | 1.34434 | 0.90727 | 0.34394 | 0.45746 | 0.32555 |
| Fendrr        | -5.65304 | 4.3E-08 | 42.9468 | 40.0909 | 18.2679 | 14.1431 | 14.9457 | 14.1909 |
| Ccdc162       | -5.67694 | 3.4E-08 | 3.64524 | 3.01474 | 3.78219 | 1.38717 | 1.19053 | 1.1769  |
| Kifc2         | -5.69906 | 2.7E-07 | 1.68552 | 1.74511 | 1.52609 | 0.54583 | 0.70256 | 0.38093 |
| Prph          | -5.70038 | 0.01915 | 0.44077 | 0.04142 | 0.16773 | 0.05935 | 0.03588 | 0.08025 |
| Lgr6          | -5.70725 | 3.3E-09 | 3.59964 | 1.15015 | 1.05017 | 0.52505 | 0.60555 | 0.57888 |
| Spta1         | -5.71222 | 0.00821 | 0.12252 | 0.01594 | 0.03228 | 0.01713 | 0.0069  | 0.02316 |
| Gm12216       | -5.71552 | 3.8E-06 | 1.89783 | 2.07211 | 2.24536 | 0.54357 | 1.03644 | 0.53712 |
| Tex26         | -5.71764 | 3.1E-05 | 1.01732 | 0.56115 | 1.31286 | 0.24119 | 0.35644 | 0.3986  |
| Dnah12        | -5.72341 | 3.9E-08 | 7.38306 | 6.4185  | 8.22182 | 2.62811 | 2.9486  | 2.27919 |
| Nme9          | -5.72772 | 9.3E-09 | 4.39651 | 4.60164 | 5.58373 | 1.83134 | 1.3286  | 2.07108 |
| 4930444P10Rik | -5.74474 | 0.00192 | 0.61984 | 0.14979 | 0.60652 | 0.16095 | 0.0973  | 0.18136 |
| Tcp11         | -5.75256 | 6.8E-13 | 3.05915 | 2.14383 | 1.79606 | 1.08561 | 0.28814 | 0.82348 |
| Apobec2       | -5.75739 | 5.5E-05 | 1.64978 | 0.44398 | 0.51365 | 0.22718 | 0.16481 | 0.36862 |
| Efcab12       | -5.77396 | 3.5E-08 | 1.40625 | 1.16037 | 1.64454 | 0.56109 | 0.47741 | 0.39339 |
| Mlip          | -5.78395 | 0.00292 | 0.32996 | 0.12685 | 0.01712 | 0.04544 | 0.04395 | 0.03686 |
| Insm1         | -5.78524 | 0.03951 | 0.14732 | 0.09968 | 0.16818 | 0.08926 | 0.02158 | 0       |
| Iqcd          | -5.78535 | 0.00397 | 1.63103 | 1.1036  | 1.73786 | 0.46117 | 0.39829 | 0.80174 |
| Gm45123       | -5.80838 | 0.00222 | 1.37868 | 0.6802  | 1.44275 | 0.6961  | 0.2525  | 0.09412 |
| Lrriq1        | -5.81691 | 3.4E-10 | 3.09452 | 2.71474 | 2.87503 | 1.02721 | 0.97675 | 0.93047 |
| Sox2ot        | -5.82201 | 0.00915 | 0.091   | 0.03421 | 0.03463 | 0.00613 | 0.03704 | 0       |
| Bzap1         | -5.8648  | 5.9E-06 | 1.02886 | 0.85392 | 1.40507 | 0.36703 | 0.52832 | 0.25996 |
| Tmem232       | -5.86886 | 7.7E-09 | 3.48538 | 1.47394 | 1.83343 | 0.93165 | 0.52569 | 0.64387 |
| Gm12059       | -5.87609 | 0.0001  | 0.20591 | 0.29856 | 0.20149 | 0.12476 | 0.02155 | 0.0482  |
| Zfp354b       | -5.87818 | 0.00029 | 0.44277 | 0.45474 | 0.39716 | 0.24911 | 0.04634 | 0.07773 |
| Kif17         | -5.88195 | 0.00027 | 0.15947 | 0.15174 | 0.36411 | 0.1087  | 0.04381 | 0.06532 |
| Clcn1         | -5.88357 | 0.00279 | 0.13462 | 0.07116 | 0.05763 | 0.03059 | 0.02465 | 0.01379 |
| Ankrd65       | -5.88666 | 2.1E-08 | 2.83271 | 1.98681 | 2.76059 | 0.79535 | 0.658   | 1.01885 |
| Adprhl1       | -5.89549 | 0.02905 | 0.42113 | 0.09234 | 0.03561 | 0.0756  | 0.04571 | 0.01278 |
| Stk36         | -5.90125 | 1.3E-11 | 2.51154 | 1.86019 | 2.12204 | 0.86831 | 0.53015 | 0.76724 |
| Slc1a7        | -5.90457 | 0.00276 | 0.13592 | 0.20692 | 0.0931  | 0.06588 | 0.01991 | 0.04454 |
| Ldb3          | -5.91021 | 1.1E-05 | 4.03853 | 0.83467 | 0.5893  | 0.46914 | 0.47827 | 0.48509 |
| Ccdc110       | -5.9154  | 0.00269 | 0.17195 | 0.23269 | 0.11778 | 0.08334 | 0.05039 | 0       |
| Myoz2         | -5.92249 | 0.04328 | 3.14865 | 0.22568 | 0.09139 | 0.12934 | 0.23458 | 0.45907 |
| Daw1          | -5.94405 | 8.6E-07 | 1.06703 | 1.37176 | 1.51047 | 0.54305 | 0.21888 | 0.55947 |
| Ccdc33        | -5.9463  | 1.6E-05 | 1.79529 | 1.47504 | 2.38134 | 0.59049 | 0.71398 | 0.53229 |
| Vwa3a         | -5.95347 | 1.8E-10 | 4.2514  | 3.59576 | 4.23603 | 1.4199  | 1.45272 | 1.15689 |
| Cfap157       | -5.95944 | 3.8E-06 | 3.02918 | 2.99627 | 2.8134  | 0.93322 | 0.45135 | 1.51424 |
| Ankef1        | -5.97848 | 3.7E-08 | 0.48307 | 0.32255 | 0.36281 | 0.13864 | 0.10244 | 0.11456 |
| Tsnaxip1      | -6.0013  | 4.8E-08 | 1.88663 | 2.25477 | 2.99658 | 0.86973 | 0.63097 | 0.97442 |
| Tnnt3         | -6.00656 | 0.00014 | 3.11575 | 0.97602 | 0.8563  | 0.34959 | 0.4227  | 0.61451 |
| Gm15411       | -6.01011 | 6.2E-06 | 0.47135 | 0.48725 | 0.26905 | 0.12693 | 0.1151  | 0.12872 |
| Tbata         | -6.02609 | 0.01104 | 0.67769 | 0.15922 | 0.47279 | 0.02281 | 0.16549 | 0.21591 |

|               |          |         |         |         |         |         |         |         |
|---------------|----------|---------|---------|---------|---------|---------|---------|---------|
| Ppil6         | -6.02616 | 2E-08   | 5.46932 | 4.49369 | 5.88701 | 1.5622  | 1.43099 | 2.3044  |
| Mdh1b         | -6.04362 | 5.4E-10 | 2.28477 | 1.43808 | 1.03119 | 0.35412 | 0.50603 | 0.52237 |
| Ccdc39        | -6.04994 | 6.3E-11 | 5.28906 | 3.79876 | 4.3569  | 1.53908 | 1.59125 | 1.31702 |
| Wdr38         | -6.0625  | 8.5E-05 | 0.66809 | 0.48434 | 0.61742 | 0.28913 | 0.16315 | 0.18245 |
| Asb14         | -6.08147 | 1.6E-06 | 2.14996 | 1.42441 | 1.88171 | 0.71644 | 0.70877 | 0.26421 |
| Clstn3        | -6.08995 | 9E-05   | 0.31255 | 0.1244  | 0.12593 | 0.08911 | 0.01347 | 0.04519 |
| C2cd4b        | -6.10591 | 1.7E-08 | 2.27139 | 2.44504 | 2.043   | 0.83406 | 0.55467 | 0.84584 |
| Ryr3          | -6.11073 | 5.6E-07 | 0.39216 | 0.15711 | 0.15316 | 0.08754 | 0.0567  | 0.05496 |
| Dlec1         | -6.12471 | 2.7E-09 | 2.76905 | 2.33047 | 2.89643 | 1.00828 | 0.8594  | 0.81579 |
| Xntrpc        | -6.1252  | 0.01118 | 0.66012 | 0.61278 | 0.42275 | 0.14632 | 0.05898 | 0.19786 |
| Kcnc4         | -6.13119 | 0.00738 | 0.12454 | 0.1264  | 0.08531 | 0.04527 | 0       | 0.04081 |
| 4930505A04Rik | -6.14932 | 0.02739 | 0.36904 | 0.15606 | 0.52662 | 0.0559  | 0.13518 | 0.07558 |
| Aox3          | -6.16522 | 3.5E-20 | 12.7792 | 9.14982 | 5.24841 | 2.38419 | 1.8077  | 3.73453 |
| Wdr49         | -6.16866 | 2.3E-09 | 1.29228 | 0.92483 | 1.13482 | 0.37141 | 0.43695 | 0.21717 |
| Crnde         | -6.17796 | 6.5E-13 | 1.53965 | 1.41711 | 1.13732 | 0.46642 | 0.19905 | 0.51939 |
| Frmpd2        | -6.17946 | 3.4E-09 | 2.48277 | 2.24388 | 2.78576 | 0.94554 | 0.82109 | 0.69738 |
| Car11         | -6.18501 | 6.6E-05 | 0.37939 | 0.52143 | 0.43311 | 0.0862  | 0.17371 | 0.11656 |
| Kremen2       | -6.18594 | 0.02989 | 0.04317 | 0.18254 | 0.34494 | 0       | 0.06325 | 0.10609 |
| Galnt16       | -6.19425 | 0.0044  | 0.19711 | 0.1042  | 0.16877 | 0.05225 | 0.02708 | 0.04037 |
| Tbx1          | -6.21659 | 5.2E-07 | 3.75219 | 3.26048 | 3.87277 | 1.58826 | 1.092   | 0.75797 |
| Phkg1         | -6.22014 | 6.9E-05 | 0.76303 | 0.19122 | 0.22584 | 0.11986 | 0.08281 | 0.11576 |
| Mycl          | -6.24288 | 2.4E-15 | 2.556   | 2.29574 | 2.09163 | 0.74006 | 0.66284 | 0.70419 |
| Mapk10        | -6.24405 | 0.00026 | 0.45135 | 0.06247 | 0.06558 | 0.02486 | 0.06012 | 0.06051 |
| Magix         | -6.25572 | 3.4E-10 | 1.03579 | 0.79641 | 0.57331 | 0.17115 | 0.27593 | 0.23143 |
| Tnnc1         | -6.27363 | 0.01811 | 14.0384 | 2.4489  | 1.80296 | 1.43533 | 1.28556 | 1.79704 |
| Ttc25         | -6.28349 | 2.2E-10 | 1.81278 | 1.42012 | 1.22133 | 0.48615 | 0.32657 | 0.53562 |
| F11           | -6.28668 | 0.03999 | 0.1631  | 0.20692 | 0.0931  | 0.02471 | 0.05974 | 0.03341 |
| Tll13         | -6.2937  | 3.7E-06 | 0.30592 | 0.2957  | 0.19956 | 0.02648 | 0.04802 | 0.16111 |
| Iqch          | -6.30019 | 3.6E-05 | 0.18495 | 0.25698 | 0.15081 | 0.08004 | 0.01936 | 0.04329 |
| Ect2l         | -6.30449 | 7.1E-14 | 1.459   | 1.25214 | 1.20021 | 0.38999 | 0.4244  | 0.33398 |
| Rbbp8nl       | -6.33585 | 0.0279  | 0.15755 | 0.19988 | 0.08993 | 0.04773 | 0       | 0.06454 |
| Gm12576       | -6.34644 | 0.03814 | 0.12034 | 0.15267 | 0.06869 | 0.03646 | 0.02204 | 0.02465 |
| Wnk2          | -6.36768 | 1.1E-05 | 0.63541 | 0.18218 | 0.27048 | 0.09788 | 0.11046 | 0.08823 |
| Bcan          | -6.37647 | 8.8E-05 | 0.62929 | 0.57026 | 0.07697 | 0.06809 | 0.16465 | 0.09206 |
| Klhl38        | -6.41265 | 0.00112 | 1.48651 | 0.94295 | 0.56567 | 0.57541 | 0.33275 | 0.30446 |
| Ccdc190       | -6.42656 | 0.0026  | 0.2107  | 0.26731 | 0.48107 | 0.15957 | 0.07718 | 0.08631 |
| Mypn          | -6.44366 | 0.01326 | 1.20135 | 0.11781 | 0.17889 | 0.09494 | 0.17857 | 0.07132 |
| RP23-35O24.3  | -6.44752 | 0.03848 | 0.32621 | 0.34487 | 0.2793  | 0.04941 | 0.11949 | 0.06681 |
| Wdr93         | -6.46181 | 2.5E-11 | 1.43902 | 1.08186 | 1.04956 | 0.33906 | 0.23427 | 0.42572 |
| Tnnt2         | -6.5093  | 0.00107 | 27.6604 | 4.58397 | 3.47572 | 2.10632 | 3.11629 | 3.025   |
| Myom2         | -6.51042 | 0.02258 | 2.5896  | 0.45375 | 0.22378 | 0.19378 | 0.30233 | 0.22821 |
| Kndc1         | -6.51325 | 3.5E-10 | 2.47342 | 1.94049 | 2.42447 | 0.68212 | 0.61234 | 0.8385  |
| Ccdc30        | -6.5336  | 8.6E-09 | 2.32249 | 1.91756 | 2.58824 | 0.77059 | 0.72919 | 0.71352 |
| Cyp2b19       | -6.53517 | 0.00175 | 0.19718 | 0.1853  | 0.05002 | 0.01327 | 0.04815 | 0.05385 |
| Sptbn4        | -6.53943 | 0.01953 | 0.0382  | 0.01616 | 0.07633 | 0.04051 | 0.03499 | 0.03912 |
| Ccdc150       | -6.5395  | 0.00023 | 0.58212 | 0.49234 | 0.76838 | 0.08817 | 0.33317 | 0.13413 |
| Snhg11        | -6.54311 | 2.1E-36 | 3.37652 | 2.90113 | 1.37054 | 0.58451 | 0.6989  | 0.77279 |
| Gm14963       | -6.54319 | 0.00029 | 0.21424 | 0.3624  | 0.24458 | 0.02163 | 0.10463 | 0.08776 |
| Gm20683       | -6.54442 | 0.03505 | 0.85117 | 0.58146 | 0       | 0.07934 | 0.11992 | 0.21456 |
| Fn3k          | -6.55595 | 8.9E-07 | 0.29069 | 0.29854 | 0.14222 | 0.07548 | 0.06084 | 0.05103 |
| Fam227a       | -6.56186 | 6.2E-13 | 1.16885 | 1.14159 | 1.1914  | 0.33723 | 0.35679 | 0.342   |
| Gm29455       | -6.56273 | 0.03064 | 0.04698 | 0.09935 | 0.21455 | 0       | 0.03442 | 0.07698 |
| Paqr9         | -6.592   | 0.0362  | 0.29474 | 0.01847 | 0.01246 | 0.02646 | 0.02399 | 0.01789 |
| Srcin1        | -6.59324 | 8.1E-11 | 1.74877 | 2.06102 | 1.64731 | 0.54425 | 0.53906 | 0.52454 |
| Kcnk12        | -6.61562 | 7E-09   | 2.02868 | 1.59611 | 2.15437 | 0.60028 | 0.38019 | 0.73437 |
| Rgs22         | -6.61669 | 1.9E-09 | 6.92784 | 4.9963  | 6.07167 | 1.71228 | 1.96973 | 1.67215 |

|               |          |         |         |         |         |         |         |         |
|---------------|----------|---------|---------|---------|---------|---------|---------|---------|
| Gm16008       | -6.64125 | 0.01466 | 0.62087 | 0.9919  | 0.70879 | 0.37618 | 0.55593 | 0.28259 |
| Gm9806        | -6.68498 | 0.00027 | 5.12947 | 8.11703 | 4.15575 | 1.20304 | 1.33342 | 2.03339 |
| Aqp3          | -6.68644 | 0.01302 | 1.59803 | 0.59132 | 0.62711 | 0.45385 | 0.03658 | 0.24547 |
| Fam179a       | -6.69698 | 6.7E-09 | 4.56363 | 5.19224 | 5.52505 | 1.65311 | 1.59431 | 1.38375 |
| Slc7a10       | -6.71391 | 3.9E-15 | 2.50951 | 1.35401 | 0.98789 | 0.68159 | 0.12679 | 0.49626 |
| Vat1l         | -6.71539 | 0.01685 | 0.05017 | 0.08486 | 0.01909 | 0.02026 | 0       | 0.0137  |
| Tex11         | -6.72093 | 0.00058 | 0.27724 | 0.34107 | 0.02877 | 0.07635 | 0.01846 | 0.06194 |
| Wdr27         | -6.75488 | 3.6E-05 | 0.35485 | 0.66027 | 0.4051  | 0.1075  | 0.12998 | 0.14536 |
| 4932443l19Rik | -6.78422 | 4.5E-08 | 0.83744 | 0.66    | 0.97775 | 0.26523 | 0.20915 | 0.24948 |
| Ak9           | -6.78507 | 2.3E-11 | 2.98866 | 2.66079 | 2.7684  | 0.92127 | 0.80665 | 0.71951 |
| A430108G06Rik | -6.80701 | 4E-07   | 1.51824 | 1.23274 | 0.62396 | 0.36795 | 0.22245 | 0.24877 |
| Plk5          | -6.80776 | 7.1E-07 | 0.85267 | 0.46155 | 0.62298 | 0.18598 | 0.14992 | 0.16765 |
| Thrsp         | -6.81986 | 0.00025 | 3.93388 | 1.20989 | 0.16331 | 0.65004 | 0.1572  | 0.35158 |
| BC024139      | -6.82203 | 0.0125  | 0.10151 | 0.05151 | 0.18541 | 0.0369  | 0.01487 | 0.03326 |
| Ccdc78        | -6.83102 | 2.3E-07 | 6.3621  | 8.04803 | 10.2945 | 2.41337 | 2.18856 | 3.17264 |
| Per3          | -6.83347 | 1.4E-23 | 9.41135 | 8.31373 | 4.78598 | 2.66101 | 1.88037 | 2.05608 |
| Wdr72         | -6.86623 | 1.8E-08 | 0.61006 | 0.28895 | 0.41787 | 0.12567 | 0.08938 | 0.13994 |
| Dmrt2         | -6.86983 | 2.5E-06 | 0.54483 | 0.52664 | 0.53313 | 0.14147 | 0.11404 | 0.15941 |
| Pla2g4c       | -6.88038 | 0.00843 | 0.0975  | 0.26802 | 0.58439 | 0.13292 | 0.14286 | 0.01997 |
| Ldlrad1       | -6.88368 | 1.7E-06 | 7.77163 | 5.3009  | 11.2571 | 2.88598 | 1.8366  | 3.01233 |
| D030018L15Rik | -6.88849 | 5.7E-07 | 0.76362 | 0.60998 | 0.84754 | 0.21848 | 0.20201 | 0.20853 |
| Gm28539       | -6.89845 | 0.00017 | 0.70448 | 1.11396 | 0.59444 | 0.05567 | 0.4039  | 0       |
| Serpina9      | -6.914   | 1.4E-05 | 0.8204  | 0.46259 | 0.62438 | 0.16569 | 0.12749 | 0.14257 |
| Gm3336        | -6.91677 | 0.00041 | 1.03161 | 0.67117 | 0.18118 | 0.2404  | 0       | 0.19504 |
| H2-K2         | -6.92634 | 8.3E-05 | 2.78628 | 4.05038 | 3.57843 | 1.31887 | 1.14818 | 0.35667 |
| Ces1f         | -6.93977 | 1.7E-08 | 1.58485 | 0.58791 | 0.22219 | 0.28639 | 0.08148 | 0.18223 |
| Lrrc71        | -6.98437 | 1.1E-07 | 4.39432 | 4.39548 | 6.25354 | 1.32514 | 2.07267 | 1.41373 |
| P2rx6         | -7.00077 | 1.9E-07 | 2.42348 | 2.06907 | 2.74055 | 0.74802 | 0.61972 | 0.59938 |
| Dcdc5         | -7.00434 | 4.8E-09 | 1.62244 | 1.23027 | 1.41788 | 0.38642 | 0.50822 | 0.27501 |
| Adam33        | -7.00741 | 7.6E-09 | 1.65945 | 1.84751 | 1.60447 | 0.42064 | 0.52102 | 0.47167 |
| Myl3          | -7.05509 | 0.0006  | 0.6256  | 0.37794 | 0.30608 | 0.13537 | 0.03274 | 0.18305 |
| Txlnb         | -7.08538 | 0.00136 | 2.68835 | 0.32282 | 0.09472 | 0.19104 | 0.19452 | 0.24472 |
| Rnf207        | -7.10475 | 6E-05   | 0.27411 | 0.14643 | 0.14823 | 0.01748 | 0.08455 | 0.03546 |
| Noxa1         | -7.10929 | 0.00031 | 0.3954  | 0.66885 | 0.77381 | 0.10267 | 0.08276 | 0.32393 |
| Ugt1a5        | -7.11533 | 0.01594 | 1.45112 | 1.1572  | 1.27795 | 0.55264 | 0.5771  | 0.37364 |
| Cecr6         | -7.14179 | 7.8E-10 | 0.52525 | 0.41252 | 0.17132 | 0.09093 | 0.0962  | 0.07684 |
| Dthd1         | -7.16215 | 0.0073  | 0.45161 | 0.19098 | 0.55852 | 0.11401 | 0.16542 | 0.03083 |
| Lmod3         | -7.17257 | 0.00455 | 0.53607 | 0.06975 | 0.09415 | 0.04997 | 0.06042 | 0.03378 |
| Tll3          | -7.20478 | 2.3E-07 | 4.16736 | 4.67403 | 5.81239 | 1.53691 | 1.71232 | 0.93518 |
| Krt79         | -7.2309  | 1.3E-11 | 2.17782 | 2.17351 | 0.94476 | 0.31668 | 0.44673 | 0.53526 |
| Al480526      | -7.2461  | 3.9E-06 | 3.94346 | 3.9893  | 1.80958 | 1.42888 | 2.32249 | 1.33029 |
| Lmod2         | -7.25388 | 0.01172 | 5.87038 | 0.89919 | 0.31661 | 0.25205 | 0.44022 | 0.71951 |
| Rgs11         | -7.2875  | 2.2E-10 | 2.75793 | 2.81016 | 2.28078 | 0.72365 | 0.79545 | 0.3914  |
| Cacna2d2      | -7.28854 | 0.01094 | 0.24151 | 0.0383  | 0.03446 | 0.01829 | 0.02212 | 0.02473 |
| Fam83e        | -7.30497 | 1.1E-05 | 0.83185 | 1.0855  | 2.00783 | 0.4176  | 0.24376 | 0.56467 |
| C130021l20Rik | -7.33036 | 0.00126 | 0.15444 | 0.13062 | 0.27705 | 0.0401  | 0       | 0.10845 |
| Ccdc60        | -7.34515 | 2.1E-06 | 1.08758 | 1.31408 | 1.35245 | 0.48244 | 0.29878 | 0.55688 |
| Asgr1         | -7.35258 | 0.01048 | 0.45927 | 0.19422 | 0.13108 | 0.10435 | 0       | 0.04703 |
| Pla2g2c       | -7.36723 | 0.00057 | 0.15172 | 0.23526 | 0.23094 | 0.04596 | 0.05558 | 0.02072 |
| Ccdc155       | -7.37223 | 1.5E-05 | 0.69517 | 0.81661 | 1.2345  | 0.32759 | 0.25464 | 0.1582  |
| Lrrc10        | -7.40414 | 0.01781 | 1.66301 | 0.16229 | 0.07302 | 0.11626 | 0.09372 | 0.1572  |
| Cfap44        | -7.41818 | 7.5E-09 | 9.05525 | 7.42228 | 10.7058 | 2.90611 | 2.8757  | 1.78856 |
| Gm45336       | -7.43078 | 0.00674 | 0.11311 | 0.1435  | 0.12913 | 0.01713 | 0.06215 | 0       |
| Gas2l2        | -7.4392  | 1.9E-07 | 2.2047  | 2.10148 | 3.23601 | 0.59368 | 0.87167 | 0.63074 |
| Armc2         | -7.43969 | 1.3E-11 | 1.19445 | 0.9995  | 1.40711 | 0.38495 | 0.31651 | 0.27067 |
| Fam161a       | -7.45441 | 2.3E-11 | 6.815   | 5.69371 | 7.06845 | 1.91348 | 1.7809  | 1.61709 |



|               |          |         |         |         |         |         |         |         |
|---------------|----------|---------|---------|---------|---------|---------|---------|---------|
| Aqp7          | -7.47248 | 0.04561 | 0.45217 | 0.05463 | 0.03687 | 0       | 0.09464 | 0.02646 |
| Erich5        | -7.47495 | 3E-09   | 1.3839  | 0.65027 | 0.96548 | 0.18633 | 0.30978 | 0.22046 |
| 5330413P13Rik | -7.48361 | 1.3E-12 | 0.92613 | 0.55217 | 0.48531 | 0.17478 | 0.16684 | 0.12438 |
| Cfap221       | -7.52477 | 2.1E-13 | 1.56668 | 1.06006 | 1.00158 | 0.30375 | 0.22955 | 0.33371 |
| C530043A13Rik | -7.52878 | 0.01213 | 1.45278 | 0.436   | 1.3375  | 0.39752 | 0.37765 | 0.07679 |
| Hmcn2         | -7.5335  | 2.2E-16 | 1.22177 | 0.47102 | 0.42168 | 0.16527 | 0.17069 | 0.14432 |
| Zfp683        | -7.53963 | 0.00888 | 0.24837 | 0.36762 | 0.21265 | 0.15048 | 0       | 0       |
| Pax9          | -7.59683 | 0.00021 | 0.4155  | 0.18335 | 0.24748 | 0.10945 | 0.02647 | 0.0592  |
| Adgrv1        | -7.63033 | 1.9E-10 | 0.49776 | 0.3711  | 0.47985 | 0.14521 | 0.11615 | 0.09364 |
| Dytn          | -7.63854 | 0.00035 | 0.14869 | 0.12576 | 0.0679  | 0.03603 | 0.03268 | 0       |
| Ccdc114       | -7.68732 | 1.6E-08 | 2.34122 | 2.53867 | 3.03254 | 0.81837 | 0.68167 | 0.62706 |
| Cacna1b       | -7.72232 | 9.1E-06 | 0.12862 | 0.11655 | 0.12586 | 0.02227 | 0.03365 | 0.03011 |
| 4930426I24Rik | -7.74025 | 0.03486 | 0.43016 | 0.24255 | 0.49107 | 0.08688 | 0       | 0.11747 |
| Ttc16         | -7.76229 | 1.6E-11 | 2.00176 | 1.86236 | 2.28522 | 0.63241 | 0.50279 | 0.46856 |
| Dnah3         | -7.82164 | 9.5E-10 | 7.82802 | 7.02583 | 9.81121 | 2.41785 | 2.21719 | 2.02438 |
| Ccdc187       | -7.83963 | 6.7E-11 | 6.38536 | 4.77959 | 5.95261 | 1.59932 | 1.43673 | 1.34779 |
| Mybpc3        | -7.87589 | 0.00538 | 5.88001 | 0.8165  | 0.60113 | 0.3988  | 0.49827 | 0.46734 |
| Pisd-ps2      | -7.90354 | 4.5E-07 | 4.59288 | 6.77968 | 6.33147 | 1.78516 | 1.96804 | 1.38441 |
| D830044I16Rik | -7.90742 | 0.00011 | 0.74029 | 0.56649 | 1.32804 | 0.21358 | 0.23243 | 0.25992 |
| Alox15        | -7.91697 | 0.00368 | 0.85606 | 0.4722  | 0.63736 | 0.0902  | 0.13634 | 0.24394 |
| Mesp1         | -7.92164 | 3.4E-05 | 0.78801 | 0.6059  | 0.32713 | 0.13021 | 0.05248 | 0.17607 |
| Gm14062       | -7.94363 | 0.02716 | 0.11047 | 0.11212 | 0.02522 | 0       | 0       | 0.0543  |
| Agr2          | -7.95976 | 0.00038 | 1.27349 | 0.95742 | 2.09997 | 0.72872 | 0.20732 | 0.17389 |
| Gm2568        | -8.05901 | 0.00611 | 0.31334 | 0.46378 | 0.35771 | 0.09492 | 0.11477 | 0       |
| Adh7          | -8.06186 | 1.3E-07 | 2.50835 | 1.04036 | 1.51437 | 0.42378 | 0.31805 | 0.41495 |
| Casq2         | -8.08617 | 0.00283 | 4.87401 | 0.73412 | 0.49544 | 0.24272 | 0.36685 | 0.51965 |
| Scn5a         | -8.1124  | 1.9E-11 | 2.4283  | 1.37509 | 1.51101 | 0.53041 | 0.38175 | 0.30738 |
| Ccdc180       | -8.11508 | 1.9E-08 | 4.97075 | 4.87568 | 6.32486 | 1.42219 | 1.39087 | 1.3433  |
| Myl2          | -8.1552  | 0.04623 | 0.09368 | 0.07923 | 0.21389 | 0.02838 | 0.03431 | 0       |
| Ttc34         | -8.15772 | 7.3E-10 | 1.88249 | 1.23316 | 1.70661 | 0.49201 | 0.50026 | 0.51408 |
| Ccna1         | -8.20508 | 0.00343 | 0.1991  | 0.1684  | 0.22729 | 0.03016 | 0.03647 | 0.04078 |
| Slc16a11      | -8.21746 | 7.6E-11 | 10.5857 | 6.04947 | 7.71625 | 2.16679 | 1.51957 | 2.10951 |
| Cntn2         | -8.24151 | 0.02945 | 0.30433 | 0.01661 | 0.01121 | 0.02379 | 0.02158 | 0.00804 |
| Eef1a2        | -8.24594 | 0.01366 | 4.77725 | 0.37069 | 0.40027 | 0.10622 | 0.54584 | 0.28725 |
| Ggnbp1        | -8.24657 | 8.3E-12 | 0.71039 | 0.73435 | 0.64578 | 0.15941 | 0.28913 | 0.11855 |
| Mcidas        | -8.24679 | 0.00389 | 0.19401 | 0.13127 | 0.26577 | 0.02351 | 0.02843 | 0.06358 |
| Ryr2          | -8.26214 | 1.4E-06 | 6.85208 | 1.72394 | 1.42956 | 0.66346 | 0.7069  | 0.56403 |
| Atcayos       | -8.34495 | 0.00052 | 0.41754 | 0.1236  | 0.02383 | 0.0506  | 0.04588 | 0.06842 |
| Gm45055       | -8.3714  | 0.00034 | 0.888   | 0.64376 | 1.15857 | 0.23058 | 0.27881 | 0       |
| Fhad1         | -8.38019 | 9.3E-10 | 7.03512 | 6.8685  | 8.86333 | 1.94649 | 1.93952 | 1.98618 |
| Gm12695       | -8.38549 | 1.1E-06 | 2.25466 | 1.8258  | 4.27163 | 0.75569 | 0.98402 | 0.39301 |
| C330002G04Rik | -8.40172 | 4.5E-10 | 1.24511 | 0.7146  | 0.71071 | 0.08083 | 0.32577 | 0.14572 |
| Insrr         | -8.43054 | 0.02895 | 0.11189 | 0.14872 | 0.18248 | 0.04842 | 0.02342 | 0.02619 |
| Pklr          | -8.46252 | 0.0013  | 0.16935 | 0.21485 | 0.12889 | 0.06841 | 0.02068 | 0       |
| Fer1l4        | -8.52254 | 1.3E-06 | 0.23841 | 0.24645 | 0.30241 | 0.07222 | 0.01941 | 0.08681 |
| Mapk15        | -8.54924 | 1.1E-07 | 7.0973  | 6.45524 | 9.24234 | 1.7503  | 1.77669 | 2.10374 |
| Pcsk4         | -8.55422 | 2.7E-08 | 0.74108 | 0.49621 | 0.74026 | 0.07483 | 0.18097 | 0.17708 |
| Ankrd61       | -8.56195 | 0.01843 | 0.50939 | 1.06051 | 0.44733 | 0.641   | 0.976   | 0.32102 |
| Gm12963       | -8.57529 | 0.00398 | 0.87748 | 0.20241 | 0.45533 | 0.09666 | 0.11688 | 0.06535 |
| Ppp1r1b       | -8.71533 | 1.1E-05 | 1.43495 | 0.65959 | 0.81907 | 0.2268  | 0.04571 | 0.53668 |
| Gm15889       | -8.73544 | 1.7E-05 | 2.19278 | 1.92594 | 0.28884 | 1.02197 | 0.67964 | 0.48366 |
| Gm20661       | -8.78735 | 4.1E-07 | 3.72116 | 4.18447 | 3.86191 | 1.25539 | 1.33207 | 0.41572 |
| Gm20662       | -8.8421  | 0.00057 | 0.83796 | 1.54253 | 3.26376 | 0.56744 | 0.79444 | 0.56536 |
| Lrrc36        | -8.88874 | 3.9E-07 | 4.80158 | 4.60662 | 7.85411 | 1.17236 | 1.73255 | 1.26232 |
| Ttll10        | -8.9114  | 1.9E-06 | 1.21478 | 1.55085 | 2.06711 | 0.36106 | 0.52053 | 0.30044 |
| Dnah2         | -8.91575 | 2.3E-11 | 2.64835 | 2.79217 | 3.1209  | 0.76163 | 0.62139 | 0.61991 |

|               |          |         |         |         |         |         |         |         |
|---------------|----------|---------|---------|---------|---------|---------|---------|---------|
| Six1          | -8.95597 | 3E-10   | 1.77132 | 0.91652 | 1.57014 | 0.35353 | 0.229   | 0.35852 |
| Bbof1         | -9.06414 | 1.2E-13 | 5.56039 | 4.39166 | 4.94753 | 1.18904 | 1.19809 | 1.07186 |
| Cfap73        | -9.10065 | 2E-05   | 2.08262 | 1.84532 | 3.17003 | 0.66095 | 0.21796 | 0.73123 |
| Flt3l_1       | -9.11161 | 7.7E-08 | 2.57992 | 4.06496 | 3.49155 | 0.92023 | 1.14317 | 0.57954 |
| Pln           | -9.11387 | 0.02554 | 11.0857 | 1.52635 | 0.29431 | 1.42813 | 1.75378 | 2.02159 |
| Xirp2         | -9.12057 | 0.03156 | 1.82233 | 0.07739 | 0.04352 | 0.11087 | 0.08379 | 0.11869 |
| D430001F17Rik | -9.13352 | 0.00073 | 0.58991 | 0.16631 | 0.2806  | 0.11914 | 0.10804 | 0.04027 |
| Ces1e         | -9.17998 | 2E-14   | 2.33664 | 1.05873 | 1.5243  | 0.42977 | 0.21398 | 0.30766 |
| Gm1667        | -9.1928  | 0.0297  | 0.16369 | 1.10755 | 0.18687 | 0.09918 | 0       | 0.1341  |
| Smyd1         | -9.23467 | 0.01122 | 1.34615 | 0.11895 | 0.11468 | 0.06087 | 0.0736  | 0.11522 |
| Npm2          | -9.2662  | 0.01416 | 0.36645 | 0.30994 | 0.20917 | 0.05551 | 0.06711 | 0       |
| Doc2g         | -9.2687  | 1.4E-07 | 1.56906 | 0.66354 | 0.51671 | 0.2011  | 0.22105 | 0.19776 |
| Lrrc23        | -9.28794 | 1.3E-08 | 11.6411 | 12.6525 | 15.5746 | 2.71274 | 2.43111 | 3.97016 |
| Hcar1         | -9.29561 | 0.00257 | 0.16683 | 0.04703 | 0.15871 | 0.03369 | 0.02037 | 0       |
| Myl4          | -9.32225 | 0.0045  | 14.0641 | 0.84965 | 0.31482 | 0.75187 | 0.66379 | 0.80687 |
| Abcc8         | -9.32732 | 3.6E-05 | 0.32742 | 0.16233 | 0.07733 | 0.02052 | 0.04136 | 0.037   |
| Reg3g         | -9.32851 | 0.00022 | 16.5047 | 15.5307 | 9.7662  | 3.534   | 2.31063 | 2.44238 |
| Obscn         | -9.33312 | 0.00023 | 2.15875 | 0.85277 | 0.61701 | 0.2164  | 0.28249 | 0.13724 |
| 9130230L23Rik | -9.33413 | 2.9E-14 | 1.34903 | 1.11414 | 1.19582 | 0.21155 | 0.29067 | 0.24705 |
| Actn2         | -9.36549 | 0.00191 | 7.76394 | 1.33842 | 0.64923 | 0.50935 | 0.47097 | 0.54694 |
| Ccdc17        | -9.38573 | 4.5E-09 | 12.316  | 15.625  | 22.0944 | 3.45295 | 3.81081 | 3.22755 |
| Plekhd1os     | -9.45685 | 0.00488 | 0.77405 | 0.32734 | 0.22091 | 0.17587 | 0       | 0       |
| Gp2           | -9.48103 | 1E-06   | 2.10287 | 2.47453 | 2.24408 | 0.66474 | 0.26792 | 0.48687 |
| Ribc2         | -9.49289 | 3.2E-06 | 0.4976  | 0.7482  | 0.31559 | 0.1005  | 0.16202 | 0       |
| Otx1          | -9.49578 | 8.5E-05 | 0.25269 | 0.15673 | 0.38462 | 0.07145 | 0.06171 | 0.0276  |
| Gm45623       | -9.49702 | 0.00137 | 0.25076 | 0.53021 | 0.64409 | 0.07596 | 0.13778 | 0.05136 |
| Pigr          | -9.52346 | 2.8E-13 | 11.0059 | 14.1644 | 17.072  | 3.38226 | 2.59341 | 3.5323  |
| 2310002F09Rik | -9.52363 | 0.01397 | 0.11324 | 0.05746 | 0.07756 | 0.01372 | 0.01659 | 0       |
| Cfap100       | -9.53463 | 2.4E-10 | 4.09933 | 4.01064 | 5.23634 | 0.81895 | 0.97399 | 1.12552 |
| Plch2         | -9.5909  | 4.4E-07 | 0.75439 | 0.60948 | 0.89978 | 0.14326 | 0.15672 | 0.18449 |
| Cdh26         | -9.60561 | 0.01129 | 0.90974 | 0.25648 | 0.20771 | 0.12861 | 0.02222 | 0.07453 |
| Scgb3a1       | -9.69857 | 7.2E-08 | 162.819 | 85.5195 | 107.061 | 31.8343 | 16.8962 | 22.6489 |
| Dnaaf3        | -9.71613 | 1.1E-07 | 4.23011 | 4.16826 | 7.31401 | 1.66716 | 1.384   | 0.97574 |
| Mylk3         | -9.72818 | 0.0035  | 2.6657  | 0.41485 | 0.09738 | 0.15505 | 0.18748 | 0.10483 |
| Gm26917       | -9.7596  | 0.00078 | 7364.29 | 15908.3 | 35842.1 | 4858    | 6198.53 | 3689.09 |
| Ttn           | -9.75987 | 0.00025 | 11.0543 | 1.83897 | 0.78098 | 0.65039 | 0.77323 | 0.55853 |
| Cfap74        | -9.76367 | 2.3E-11 | 2.05604 | 2.00291 | 2.7768  | 0.6451  | 0.55812 | 0.34591 |
| Slc5a8        | -9.83435 | 0.00676 | 0.80678 | 0.29037 | 0.47031 | 0.1456  | 0.08803 | 0.05625 |
| Cfap46        | -9.88131 | 2.3E-11 | 4.39656 | 4.43879 | 5.67479 | 1.12192 | 1.04461 | 0.88425 |
| Dnah10        | -9.91971 | 6E-10   | 5.47367 | 5.23944 | 7.20812 | 1.34858 | 1.21464 | 1.26994 |
| Ccdc13        | -9.93951 | 2E-08   | 1.54991 | 1.74031 | 2.01343 | 0.42096 | 0.29365 | 0.39407 |
| Ybx2          | -10.0031 | 0.01279 | 0.09691 | 0       | 0.60848 | 0.02936 | 0.0355  | 0.07939 |
| Ccdc108       | -10.0514 | 7.4E-10 | 10.7848 | 9.69476 | 13.4991 | 2.52735 | 2.49095 | 1.69435 |
| Gm12474       | -10.062  | 1.4E-06 | 1.55468 | 0.38352 | 1.03532 | 0.15699 | 0.28474 | 0.05307 |
| Odf3b         | -10.0662 | 1.6E-08 | 10.4612 | 9.44271 | 17.964  | 2.87618 | 2.25406 | 3.24091 |
| Hhatl         | -10.1903 | 9.8E-10 | 0.90468 | 0.41201 | 0.59584 | 0.12649 | 0.12745 | 0.05701 |
| Pde4c         | -10.2569 | 1.2E-12 | 0.42827 | 0.37616 | 0.20685 | 0.05988 | 0.04827 | 0.05398 |
| Kcna1         | -10.2663 | 8.2E-08 | 0.36306 | 0.19394 | 0.13088 | 0.02315 | 0.028   | 0.06262 |
| Gm12847       | -10.2812 | 0.01072 | 0.44231 | 0.56115 | 1.26237 | 0.26799 | 0       | 0       |
| Acvr1c        | -10.3429 | 0.00018 | 0.13762 | 0.07482 | 0.02244 | 0.00596 | 0       | 0.03221 |
| RP24-170O17.2 | -10.4049 | 0.00011 | 0.13632 | 0.26904 | 0.41501 | 0.05506 | 0       | 0.07446 |
| Cilp2         | -10.437  | 0.00056 | 0.40227 | 0.08954 | 0.04834 | 0.01283 | 0.01551 | 0.05204 |
| Capn8         | -10.4755 | 0.00134 | 0.04845 | 0.20491 | 0.24892 | 0.01468 | 0.05325 | 0.01985 |
| Crocc2        | -10.4888 | 5.1E-06 | 1.53681 | 1.38646 | 3.33341 | 0.48108 | 0.56293 | 0.30427 |
| Mettl7a3      | -10.4912 | 3.4E-07 | 1.01612 | 0.66843 | 0.32222 | 0.13681 | 0.12407 | 0.18499 |
| Mylk4         | -10.5138 | 0.00228 | 1.31164 | 0.12606 | 0.10209 | 0.04515 | 0.08735 | 0.06105 |

|               |          |         |         |         |         |         |         |         |
|---------------|----------|---------|---------|---------|---------|---------|---------|---------|
| Mlxip1        | -10.5208 | 6.7E-12 | 0.87412 | 0.36268 | 0.15063 | 0.06995 | 0.06041 | 0.08107 |
| D930020B18Rik | -10.7529 | 2.4E-10 | 0.73801 | 0.53503 | 0.6018  | 0.06388 | 0.10298 | 0.14396 |
| Myh6          | -10.7658 | 0.00144 | 103.929 | 14.0945 | 8.03352 | 4.53391 | 5.22908 | 7.16811 |
| Spdef         | -10.8299 | 8.7E-06 | 0.50094 | 0.74145 | 1.33437 | 0.17705 | 0.12233 | 0.2052  |
| Cyp4a12b      | -10.9273 | 0.00012 | 0.99156 | 0.51609 | 0.56598 | 0.11553 | 0.08382 | 0.03124 |
| Csrp3         | -11.1281 | 0.02129 | 5.60815 | 0.31815 | 0.11712 | 0.20719 | 0.15031 | 0.39221 |
| Ccdc129       | -11.2317 | 2.3E-15 | 2.0105  | 0.79641 | 1.4236  | 0.24671 | 0.20508 | 0.25019 |
| Wdr95         | -11.3071 | 6.1E-06 | 1.18211 | 0.91094 | 1.6194  | 0.25466 | 0.23093 | 0.19369 |
| Cyp2a5        | -11.3103 | 8.9E-06 | 47.4532 | 6.96868 | 10.8145 | 4.88528 | 1.25886 | 3.93456 |
| Ky            | -11.3922 | 2.7E-09 | 1.11861 | 0.73586 | 0.86908 | 0.22592 | 0.06829 | 0.16547 |
| Entpd8        | -11.6576 | 5.8E-05 | 0.13457 | 0.39835 | 0.15362 | 0.04077 | 0.02465 | 0.02756 |
| Trim54        | -11.7944 | 0.00129 | 1.78096 | 0.21519 | 0.07261 | 0.07708 | 0.09319 | 0.10422 |
| Mybphl        | -11.8073 | 0.01773 | 8.87607 | 0.48434 | 0.16343 | 0.13011 | 0.41952 | 0.52779 |
| Aspg          | -11.8303 | 1.2E-05 | 0.40119 | 0.50898 | 1.10683 | 0.10128 | 0.17145 | 0.08217 |
| Slc35d3       | -11.8682 | 0.00013 | 0.48621 | 0.11749 | 0.31718 | 0.02104 | 0.02544 | 0.08536 |
| Bpifb1        | -11.9348 | 3.7E-06 | 31.4644 | 16.168  | 18.7095 | 5.58447 | 2.21996 | 2.87565 |
| Slc22a13b-ps  | -11.9785 | 0.04588 | 0.12529 | 0.21194 | 0.21455 | 0.11387 | 0.04589 | 0       |
| Trim63        | -12.0346 | 0.00825 | 0.80346 | 0.16309 | 0.07338 | 0       | 0.07063 | 0.05266 |
| Sec14l5       | -12.0509 | 9.3E-05 | 0.54717 | 0.39667 | 0.89235 | 0.09472 | 0.02863 | 0.19212 |
| Tll6          | -12.1134 | 3.7E-12 | 2.8654  | 2.50362 | 3.13598 | 0.54522 | 0.5378  | 0.31041 |
| Gm29266       | -12.2429 | 2.1E-05 | 1.52229 | 1.41628 | 1.73786 | 0.09223 | 0.22304 | 0.37414 |
| Oit1          | -12.3855 | 5.7E-05 | 1.16819 | 0.67927 | 0.5001  | 0.17695 | 0.05349 | 0.05982 |
| Ascl1         | -12.5819 | 6.4E-07 | 0.52563 | 0.20518 | 0.41542 | 0.04899 | 0.02962 | 0.06625 |
| Acp7          | -12.6294 | 0.00896 | 0.24553 | 0.10383 | 0.23358 | 0       | 0.02998 | 0.03353 |
| Klhl34        | -12.775  | 0.0001  | 0.42483 | 0.23954 | 0.21555 | 0.0572  | 0       | 0.03867 |
| Cpt1b         | -12.9492 | 0.00762 | 3.25045 | 1.07676 | 0.12369 | 0.18053 | 0.53578 | 0.06657 |
| Slc5a9        | -12.9851 | 0.00075 | 0.15857 | 0.11922 | 0.26148 | 0       | 0.02582 | 0.05774 |
| Gm37381       | -13.0196 | 0.00011 | 0.5357  | 0.33982 | 0.38223 | 0.08114 | 0.04906 | 0       |
| Gmnc          | -13.0931 | 1.7E-14 | 0.73822 | 0.41625 | 0.33199 | 0.08132 | 0.06555 | 0.03665 |
| Slc17a7       | -13.0936 | 0.01066 | 0.95483 | 0.11818 | 0.05317 | 0.04233 | 0.06824 | 0       |
| Atp6v1b1      | -13.2606 | 2.6E-13 | 0.91734 | 0.35267 | 0.52362 | 0.10105 | 0.07637 | 0.05124 |
| Atp2b2        | -13.2964 | 7.2E-25 | 1.12253 | 0.88816 | 0.85157 | 0.14919 | 0.11142 | 0.14833 |
| E030044B06Rik | -13.3051 | 7.3E-06 | 0.64932 | 0.42714 | 0.6589  | 0.08742 | 0.05285 | 0.05911 |
| 9030622O22Rik | -13.4267 | 3.8E-12 | 1.68339 | 1.83714 | 2.35572 | 0.23031 | 0.27847 | 0.3559  |
| RP23-199N18.2 | -13.468  | 0.02757 | 0.58456 | 0.37081 | 0.33367 | 0.08854 | 0       | 0       |
| Gm45218       | -13.4986 | 0.0295  | 0.21773 | 0.13811 | 0.12428 | 0.03298 | 0       | 0       |
| Sox21         | -13.5558 | 3.9E-05 | 0.45681 | 0.24402 | 0.43915 | 0.05827 | 0.03523 | 0.07879 |
| Cidec         | -13.5944 | 8E-06   | 4.4783  | 0.99895 | 0.16854 | 0.38762 | 0.0721  | 0.12095 |
| Flg           | -13.6471 | 0.00141 | 0.0504  | 0.09592 | 0.32367 | 0.03054 | 0.02769 | 0.02581 |
| Dbp           | -13.8406 | 5E-41   | 20.2939 | 11.8988 | 8.84897 | 2.03387 | 1.0284  | 3.10016 |
| Art1          | -13.9724 | 0.01305 | 0.97548 | 0.16501 | 0.11136 | 0       | 0.07146 | 0       |
| Trdn          | -14.3637 | 0.00695 | 1.13312 | 0.17114 | 0.0231  | 0.07356 | 0.02965 | 0.01658 |
| Dydc1         | -14.4485 | 4.6E-06 | 0.82617 | 0.85404 | 2.2007  | 0.05562 | 0.269   | 0.22561 |
| Gm15751       | -14.6299 | 0.0009  | 1.27539 | 0.70531 | 0.896   | 0.56469 | 0.86247 | 0.48225 |
| Tymp          | -14.7468 | 2E-08   | 4.34941 | 5.34732 | 7.98544 | 0.97802 | 1.14971 | 0.95511 |
| Lrrc43        | -14.7536 | 5E-08   | 3.581   | 4.41225 | 6.91442 | 1.01787 | 0.90686 | 0.25353 |
| Cyp2e1        | -15.0001 | 5.2E-07 | 5.20599 | 0.57277 | 0.24159 | 0.2308  | 0.15504 | 0.17338 |
| Mhrt          | -15.3014 | 0.0006  | 1.27903 | 0.82724 | 0.25767 | 0       | 0.16535 | 0.06164 |
| T2            | -15.4895 | 4.9E-09 | 1.49649 | 2.26954 | 2.76879 | 0.37519 | 0.18902 | 0.33821 |
| Gm21887       | -15.743  | 0.00373 | 9.26613 | 49.262  | 141.639 | 11.0826 | 24.1558 | 8.873   |
| Tcap          | -15.7573 | 0.00025 | 26.7847 | 5.2968  | 3.29973 | 0.75888 | 1.19992 | 1.4208  |
| Hamp          | -15.8778 | 0.01024 | 8.91098 | 0.37684 | 0.50864 | 0.26995 | 0       | 0.73004 |
| Hrc           | -15.9392 | 0.00049 | 4.62739 | 0.33116 | 0.04064 | 0.08627 | 0.13038 | 0.20413 |
| Fut9          | -16.2875 | 3.7E-06 | 0.14536 | 0.11735 | 0.14331 | 0.02402 | 0.01936 | 0       |
| Tnni3         | -16.3738 | 2.9E-07 | 22.8897 | 5.13015 | 4.19512 | 0.9657  | 1.16766 | 0.94307 |
| Foxa3         | -17.1316 | 7.4E-06 | 0.35871 | 0.41717 | 0.87021 | 0.13584 | 0       | 0.03673 |



|               |          |         |         |         |         |         |         |         |
|---------------|----------|---------|---------|---------|---------|---------|---------|---------|
| Clca3b        | -17.6253 | 0.00931 | 0.16305 | 0.09194 | 0.06205 | 0       | 0       | 0.02226 |
| Gm44868       | -17.7313 | 0.00565 | 0.70695 | 0.59792 | 0.32282 | 0.08567 | 0       | 0       |
| Gm44963       | -17.8277 | 0.00044 | 0.98081 | 0.10369 | 1.11969 | 0.07428 | 0       | 0.10044 |
| Tmem182       | -18.1176 | 0.00731 | 1.37881 | 0.02844 | 0.03839 | 0.02038 | 0.04927 | 0.02755 |
| Lypd2         | -18.4841 | 3.6E-25 | 17.6218 | 10.4671 | 14.2817 | 1.30403 | 0.98547 | 2.20409 |
| Cfd           | -18.8272 | 2.6E-05 | 20.4842 | 2.59459 | 1.80752 | 0.35974 | 0.94244 | 0.5675  |
| Sspo          | -19.0418 | 2E-08   | 0.40881 | 0.50647 | 0.89396 | 0.1221  | 0.05905 | 0.0283  |
| Tacr1         | -19.647  | 1.5E-07 | 0.70357 | 0.40465 | 0.72288 | 0.09378 | 0.06185 | 0.02306 |
| Foxn4         | -19.7579 | 2.9E-05 | 0.08129 | 0.18333 | 0.27839 | 0       | 0.01985 | 0.0222  |
| Mpz           | -20.1508 | 2.6E-05 | 0.90862 | 2.67142 | 0.04939 | 0.10486 | 0.09509 | 0.07089 |
| Gm43634       | -20.2451 | 0.00033 | 1.62378 | 4.00565 | 9.88648 | 0       | 1.38783 | 0       |
| Chad          | -23.1462 | 4E-21   | 11.3085 | 7.26534 | 9.93062 | 1.5482  | 0.87625 | 1.06898 |
| Fitm1         | -24.5417 | 0.00894 | 1.50815 | 0.15945 | 0.10761 | 0.05711 | 0       | 0       |
| Kcnj3         | -24.6878 | 0.00594 | 2.90739 | 0.19257 | 0.11997 | 0.02122 | 0.06415 | 0.07174 |
| Krt15         | -24.724  | 0.01191 | 2.63623 | 0.43719 | 0.29505 | 0.06264 | 0.07574 | 0.04235 |
| Cdc20b        | -25.2305 | 0.0066  | 0.09993 | 0.04226 | 0.51337 | 0.03027 | 0       | 0       |
| Alox12e       | -25.8287 | 0.00195 | 0.12928 | 0.19135 | 0.18449 | 0.01958 | 0       | 0       |
| Ckmt2         | -25.9146 | 1.4E-07 | 7.9905  | 1.40363 | 0.28068 | 0.22344 | 0.09006 | 0.20142 |
| Krt5          | -25.9599 | 0.00161 | 0.66731 | 0.21165 | 0.23806 | 0.05054 | 0       | 0       |
| Nppa          | -26.9967 | 0.00606 | 33.8952 | 4.10819 | 1.80818 | 0.89567 | 0.61885 | 0.51904 |
| Mb            | -27.4033 | 0.00101 | 37.0603 | 1.85108 | 0.66627 | 0.57462 | 0.48101 | 0.89651 |
| BC027072      | -30.0285 | 0.04611 | 0.03651 | 0.06175 | 0.04168 | 0       | 0       | 0       |
| Lyzl4         | -30.5786 | 0.02994 | 0.1303  | 0.1653  | 0.22312 | 0       | 0       | 0       |
| Myl1          | -31.7914 | 0.00477 | 2.4662  | 0.11174 | 0       | 0.05337 | 0.03226 | 0       |
| Car3          | -34.8932 | 3.4E-05 | 13.1666 | 0.94374 | 0.36395 | 0.05795 | 0.25691 | 0.23506 |
| Gm11771       | -35.3639 | 0.04043 | 0.87345 | 0.31661 | 0       | 0       | 0       | 0       |
| Muc5b         | -35.8005 | 3.1E-16 | 39.0217 | 30.975  | 38.4712 | 2.92158 | 1.87361 | 1.36016 |
| Lgals12       | -36.2555 | 1.5E-17 | 1.51516 | 0.55717 | 0.63924 | 0.07983 | 0       | 0.02698 |
| Tmem45b       | -38.0407 | 1.6E-05 | 0.84965 | 0.23954 | 0.16166 | 0       | 0       | 0.03867 |
| Tff2          | -42.6193 | 9E-12   | 10.6352 | 15.4768 | 17.6762 | 1.23188 | 0.45831 | 0.3844  |
| Gm26887       | -47.6536 | 0.00363 | 1.16885 | 0.56491 | 0.38125 | 0       | 0       | 0       |
| Gm5737        | -48.2543 | 0.00209 | 0.35903 | 0.30366 | 0.24592 | 0       | 0       | 0       |
| Dusp15        | -48.3652 | 0.00214 | 0.07919 | 0.15629 | 0.09041 | 0       | 0       | 0       |
| Ctcflos       | -49.5563 | 0.00482 | 0.19708 | 0.04546 | 0.02045 | 0       | 0.01313 | 0       |
| Acnat1        | -50.1095 | 0.00177 | 0.21461 | 0.14521 | 0.343   | 0       | 0       | 0       |
| Ckm           | -52.0233 | 3.4E-06 | 3.76262 | 0.53039 | 0.17898 | 0.05699 | 0.02297 | 0       |
| A530016L24Rik | -52.5525 | 0.01527 | 0.4158  | 0.11723 | 0       | 0       | 0       | 0       |
| Gm15883       | -53.0215 | 0.00077 | 11.3496 | 7.45091 | 7.77409 | 0.75315 | 0.6335  | 0.44277 |
| Adipoq        | -53.6459 | 0.00014 | 2.38099 | 0.27969 | 0.15101 | 0       | 0.04845 | 0       |
| Plin1         | -54.6625 | 1.1E-05 | 2.29867 | 0.13293 | 0.06729 | 0.02381 | 0.01439 | 0.0161  |
| Gm13304       | -57.0775 | 0.0231  | 7.63875 | 3.32266 | 0       | 0       | 0       | 0       |
| Ern2          | -71.6354 | 1.6E-06 | 0.4006  | 0.31276 | 1.0202  | 0.03734 | 0       | 0       |
| Gm18595       | -83.8866 | 1.1E-05 | 0.94074 | 0.57866 | 0.39053 | 0       | 0       | 0       |
| Fcgbp         | -91.0291 | 2.1E-08 | 0.99195 | 5.28406 | 7.87723 | 0.15289 | 0.05737 | 0.17109 |
| Muc5ac        | -111.863 | 1.5E-09 | 0.95143 | 5.11563 | 7.64192 | 0.14411 | 0.07468 | 0.07655 |
| Fer1l6        | -118.392 | 1.9E-06 | 0.28355 | 1.33342 | 4.15636 | 0.08246 | 0.00831 | 0.03717 |
| Pck1          | -125.604 | 4.6E-09 | 7.48494 | 0.54069 | 0.18245 | 0.01614 | 0.05854 | 0       |
| Capn9         | -128.076 | 0.01305 | 0.03784 | 0.19201 | 0.64792 | 0       | 0       | 0       |
| Gm28635       | -171.921 | 0.00303 | 0.15435 | 1.74608 | 1.05725 | 0       | 0       | 0       |
| Smpx          | -174.424 | 0.00063 | 2.24831 | 0.13583 | 0       | 0       | 0       | 0       |
| Gcom1         | -200.665 | 1.2E-05 | 7.6732  | 10.339  | 7.914   | 0       | 0.23261 | 0       |
| RP23-325D10.3 | -232.8   | 2E-09   | 1.30731 | 1.68067 | 0.73627 | 0       | 0       | 0       |
| Chil4         | -301.531 | 0.00082 | 0.05935 | 1.90745 | 6.1655  | 0       | 0.04348 | 0       |
| Clca1         | -1925.78 | 3.4E-10 | 3.86921 | 59.1916 | 83.4558 | 0.10256 | 0.01772 | 0.05944 |
