# Supplementary material for: Transcriptomic Evaluation of Pulmonary Fibrosis-Related Genes: Utilization of Transgenic Mice with Modifying p38 Signal in the Lungs
Source: MDPI journal article supplement (doi:10.3390/ijms21186746), 2020-09-14
Supplement: s1 [file s1]

**Supplementary Table S5.** The gene symbol list of 493 common DEGs upregulated by BLM among MKK6-CA, WT, and p38-DN groups.

|               |         |         |         |               |
|---------------|---------|---------|---------|---------------|
| A2m           | Ccl22   | Clec5a  | Ereg    | Gyg           |
| Abcb1b        | Ccl6    | Clec7a  | Esco2   | H2-Eb2        |
| Ackr1         | Ccl7    | Cmah    | Espl1   | Has2          |
| Ackr3         | Ccl9    | Cmtm3   | Etv4    | Havcr2        |
| Adam12        | Ccna2   | Col12a1 | F10     | Hbegf         |
| Adamts12      | Ccnb2   | Col28a1 | F7      | Hcn1          |
| Adamts4       | Ccne1   | Col3a1  | Fabp5   | Hells         |
| Adgre1        | Ccnf    | Col4a1  | Fam105a | Hexb          |
| AI506816      | Ccng1   | Col5a2  | Fam20c  | Hist1h1a      |
| Ano5          | Ccr1    | Col5a3  | Fam49b  | Hist1h1b      |
| Anxa1         | Ccr2    | Col8a1  | Fbn1    | Hist1h2ab     |
| Aoah          | Ccr5    | Coro1a  | Fcer1g  | Hist1h2ak     |
| Apbb1ip       | Cd180   | Cotl1   | Fcgr1   | Hist1h2bk     |
| Apobec1       | Cd200r1 | Cpxm1   | Fcgr2b  | Hist1h2bm     |
| Apoe          | Cd200r4 | Csf2rb  | Fcgr3   | Hist1h3d      |
| Arg1          | Cd248   | Csf2rb2 | Fcrls   | Hist1h4f      |
| Arhgdib       | Cd276   | Csmd1   | Fermt3  | Hpgds         |
| Armxc4        | Cd300a  | Cstb    | Fgr     | Hsd17b7       |
| Arpc1b        | Cd300c2 | Cthrc1  | Fhl3    | Hvcn1         |
| Aspm          | Cd300lf | Ctps    | Figl1   | I830077J02Rik |
| Atg9b         | Cd38    | Ctsb    | Fkbp10  | Icam1         |
| Atp1a3        | Cd48    | Ctsc    | Fn1     | Icos          |
| Atp6v0c       | Cd52    | Ctsd    | Foxm1   | Ier3          |
| Atp6v0d2      | Cd53    | Ctss    | Frzb    | Ifi204        |
| B2m           | Cd68    | Ctsz    | Fscn1   | Ifi207        |
| B3gnt5        | Cd84    | Cxcl10  | Fst     | Ifi209        |
| B430306N03Rik | Cd86    | Cxcl13  | Fstl1   | Ifi2712a      |
| Bard1         | Cdc20   | Cxcl15  | Fzd1    | Ifi30         |
| Bcl2a1b       | Cdca3   | Cxcl16  | Gas2l3  | Ifit2         |
| Bgn           | Cdh11   | Cxcl9   | Gcnt4   | Ifitm3        |
| Birc5         | Cdk1    | Cybb    | Gda     | Igf1          |
| Bmper         | Cdkn1a  | Cyp4f18 | Gdf15   | Igfbp2        |
| Brinp1        | Cemip   | Cyp7b1  | Gimap9  | Igha          |
| Bst1          | Cenpf   | Dab2    | Gja1    | Ighg2b        |
| Btk           | Cenpl   | Dck     | Gla     | Ighv1-53      |
| Btla          | Cers6   | Ddias   | Glpr2   | Ighv1-64      |
| Bub1          | Cfp     | Dhfr    | Glrx    | Igkv10-96     |
| C1qa          | Ch25h   | Diaph3  | Gm10718 | Igkv1-110     |
| C1qb          | Chl1    | Disp2   | Gm14548 | Igkv1-117     |
| C1qc          | Chodl   | Dlgap5  | Gm6377  | Igkv8-30      |
| C1qtnf6       | Chrna7  | Ear2    | Gnpda1  | Iglc2         |
| C330027C09Rik | Chsy3   | Eda2r   | Gpnmb   | Igsf6         |
| C3ar1         | Ckap2   | Egr2    | Gpr141  | Il1rn         |
| C430002N11Rik | Ckap4   | Eln     | Gpr176  | Il21r         |
| C5ar1         | Clca3a1 | Emcn    | Gpr35   | Il2rg         |
| Capg          | Cldn4   | Enc1    | Gpr65   | Il4ra         |
| Capn6         | Clec4a2 | Eno1    | Grn     | Ildr2         |
| Casp3         | Clec4a3 | Enpp1   | Grrp1   | Irf5          |
| Ccdc80        | Clec4e  | Epha3   | Gtse1   | Isg15         |
| Ccl17         | Clec4n  | Ercc6l  | Gusb    | Itga5         |

|         |         |         |           |           |
|---------|---------|---------|-----------|-----------|
| Itgam_1 | Mdga1   | Pdpm    | Sash3     | Tgfb1     |
| Itgax   | Megf10  | Pgf     | Scarb1    | Tgfb1     |
| Itgb2   | Mest    | Phex    | Scn3b     | Tgm1      |
| Itgb6   | Mgp     | Phlda3  | Scube1    | Thbs1     |
| Itm2a   | Mki67   | Pik3cg  | Sdcbp     | Thbs4     |
| Kcnk13  | Mmp12   | Pilra   | Sdk2      | Tifab     |
| Kctd12b | Mmp14   | Pim1    | Selp      | Timp1     |
| Kif11   | Mmp19   | Pirb    | Selplg    | Tlr1      |
| Kif15   | Mmp8    | Pla1a   | Serpina3g | Tlr13     |
| Kif22   | Mpeg1   | Plat    | Serpina3n | Tlr2      |
| Kif4    | Ms4a1   | Plau    | Serpinb6b | Tlr7      |
| Kn11    | Ms4a6b  | Plbd1   | Serpinb9  | Tlr8      |
| Kntc1   | Ms4a6c  | Pld3    | Serpine1  | Tmem106a  |
| Kynu    | Ms4a6d  | Pld4    | Serpine2  | Tmem173   |
| Lair1   | Ms4a7   | Plek    | Sfrp1     | Tmem26    |
| Lama1   | Msr1    | Plxnc1  | Sgk1      | Tmem37    |
| Lamb3   | Mt2     | Pole    | Sgpl1     | Tmem86a   |
| Lamc2   | Mthfd2  | Pou2af1 | Sh2b2     | Tmsb10    |
| Laptm5  | Mybl1   | Ppa1    | Sh2d1b1   | Tnc       |
| Lcn2    | Myc     | Prc1    | Sh3pxd2b  | Tnfaip8l2 |
| Lgals3  | Myo5a   | Prcp    | Shc4      | Tnfrsf11b |
| Lgals9  | Naip2   | Prkcb   | Shcbp1    | Tnfrsf12a |
| Lgmn    | Napsa   | Prr11   | Siglec1   | Tnfrsf13b |
| Lhfp12  | Ncapg   | Prrx2   | Sirpa     | Tnfrsf1b  |
| Lhx6    | Ncapg2  | Prss22  | Sirpb1c   | Tnfsf8    |
| Lilrb4a | Ncf2    | Psap    | Slamf9    | Tnip3     |
| Lipa    | Nckap11 | Psat1   | Slc11a1   | Top2a     |
| Litaf   | Ndc1    | Psmb8   | Slc15a3   | Tpx2      |
| Lox     | Ndnf    | Psrc1   | Slc27a6   | Trem2     |
| Loxl2   | Nek6    | Ptafr   | Slc29a3   | Trim59    |
| Lpcat2  | Nfam1   | Ptger4  | Slc35f6   | Tspan8    |
| Lpl     | Nme1    | Ptgir   | Slc37a2   | Ttyh2     |
| Lpxn    | Nme2    | Ptprc   | Slc39a14  | Tyrobp    |
| Lrg1    | Nos2    | Rab32   | Slc7a8    | Ubash3b   |
| Lrp12   | Nrcam   | Rab3il1 | Slfn1     | Ugcg      |
| Lrp2    | Nrep    | Rab8b   | Slfn10-ps | Ulb1      |
| Lrrc25  | Nt5e    | Rac2    | Slfn2     | Vcan      |
| Lrrc8c  | Ntrk2   | Racgap1 | Slfn8     | Vstm4     |
| Ltb2    | Nuf2    | Rap2b   | Slfn9     | Wfdc17    |
| Ly6a    | Nusap1  | Rcan1   | Sparc     | Wisp1     |
| Ly6c1   | Nxpe4   | Rgs16   | Spc25     | Wnt10a    |
| Ly6c2   | Nxpe5   | Rhoh    | Spi1      | Wnt7a     |
| Ly86    | Oas3    | Rpl39   | Spp1      | Zfp385a   |
| Lyz2    | Olfr1   | Rrm2    | Spr1a     |           |
| Malt1   | Olfr1   | Rsd2    | Spry4     |           |
| Map2    | Osm     | Rtn4rl2 | St8sia4   |           |
| March1  | P2ry6   | S100a4  | Stra6l    |           |
| Marcks1 | P4ha3   | S100a6  | Svop      |           |
| Mcemp1  | Pappa2  | Saa3    | Syt12     |           |
| Mcm5    | Pdgfc   | Samsn1  | Tfec      |           |
