# Supplementary material for: Transcriptomic Evaluation of Pulmonary Fibrosis-Related Genes: Utilization of Transgenic Mice with Modifying p38 Signal in the Lungs
Source: MDPI journal article supplement (doi:10.3390/ijms21186746), 2020-09-14
Supplement: s1 [file s1]

**Supplementary Table S1.** BLM-induced cytokine molecules in BALF that were correlated with intrinsic p38 activity in the lungs.

| Pro-fibrotic cytokines<br>Name | Induction Index (Arbitrary unit) |      |      |
|--------------------------------|----------------------------------|------|------|
|                                | DN                               | WT   | CA   |
| <b>IL-13</b>                   | 5.2                              | 6.5  | 15.0 |
| <b>IL-17</b>                   | 8.5                              | 32.2 | 43.5 |
| <b>SDF-1/CXCL12</b>            | 2.9                              | 5.4  | 7.2  |

| Pro-inflammatory mediators<br>Name   | Induction Index (Arbitrary unit) |      |      |
|--------------------------------------|----------------------------------|------|------|
|                                      | DN                               | WT   | CA   |
| CCL1/TCA-3                           | 2.5                              | 5.8  | 6.8  |
| Eotaxin/CCL11                        | 4.0                              | 39.0 | 62.0 |
| <b>IFN-<math>\gamma</math></b>       | 6.7                              | 8.6  | 14.2 |
| IL-15                                | 3.5                              | 6.0  | 14.0 |
| <b>KC/CXCL1</b>                      | 5.8                              | 7.6  | 11.7 |
| LIX/CXCL5                            | 2.2                              | 2.7  | 4.3  |
| <b>MIG/CXCL9</b>                     | 2.9                              | 5.0  | 11.9 |
| <b>MIP-1<math>\alpha</math>/CCL3</b> | 17.6                             | 29.0 | 33.6 |
| MIP-2/CXCL2                          | 3.5                              | 5.2  | 6.4  |
| <b>RANTES/CCL5</b>                   | 37.4                             | 49.0 | 65.7 |
| Thymus chemokine-1/CXCL7             | 1.4                              | 2.8  | 5.4  |

| Fibrosis-related proteins<br>Name | Induction Index (Arbitrary unit) |      |      |
|-----------------------------------|----------------------------------|------|------|
|                                   | DN                               | WT   | CA   |
| Activin A                         | 1.3                              | 2.4  | 4.2  |
| CXCL14                            | 3.1                              | 10.4 | 11.6 |
| IGFBP-2                           | 4.3                              | 5.8  | 8.3  |
| IGFBP-3                           | 4.2                              | 5.6  | 8.1  |
| IGFBP-5                           | 2.3                              | 26.6 | 64.1 |
| IL-22                             | 11.0                             | 26.0 | 49.0 |
| <b>MMP-2</b>                      | 3.7                              | 6.5  | 9.4  |
| <b>MMP-3</b>                      | 15.0                             | 41.0 | 88.2 |
| <b>MMP-9</b>                      | 4.0                              | 17.0 | 93.7 |

| Others<br>Name  | Induction Index (Arbitrary unit) |        |        |
|-----------------|----------------------------------|--------|--------|
|                 | Ind_DN                           | Ind_WT | Ind_CA |
| Cardiotrophin-1 | 7.5                              | 30.0   | 42.5   |
| <b>CCL28</b>    | 6.1                              | 13.3   | 16.4   |
| CCR9            | 2.7                              | 3.5    | 5.5    |
| CD11b           | 3.2                              | 4.1    | 6.4    |
| CD27 Ligand     | 3.5                              | 6.7    | 8.6    |
| IL-2R $\gamma$  | 9.7                              | 17.3   | 23.1   |
| CTACK           | 3.5                              | 9.3    | 10.4   |
| Dtk             | 2.5                              | 3.9    | 5.3    |
| EGF R           | 11.3                             | 30.6   | 39.7   |
| EG-VEGF         | 10.7                             | 14.0   | 20.7   |
| Endogrin/CD105  | 4.2                              | 18.8   | 27.2   |
| Eotaxin-2       | 10.2                             | 31.6   | 34.3   |
| FGF R3          | 6.7                              | 8.6    | 15.2   |
| Follistatin     | 1.2                              | 3.8    | 8.1    |
| Frizzled-1      | 1.2                              | 4.9    | 8.5    |

|                       |      |      |       |
|-----------------------|------|------|-------|
| GDF-5                 | 28.5 | 47.5 | 61.0  |
| GDF-8                 | 27.8 | 46.7 | 65.9  |
| GDF-9                 | 9.0  | 33.0 | 42.0  |
| GDNF R $\alpha$ -2    | 1.7  | 24.0 | 58.0  |
| IFN- $\gamma$ R1      | 3.4  | 4.3  | 6.7   |
| IGFBP-1               | 3.6  | 5.0  | 8.0   |
| IGFBP-6               | 5.0  | 29.0 | 43.5  |
| IL-1 RII              | 4.4  | 7.4  | 10.2  |
| IL-3 R $\alpha$       | 8.3  | 86.4 | 113.6 |
| IL-15 R $\alpha$      | 2.3  | 3.9  | 6.0   |
| IL-16                 | 4.6  | 7.5  | 10.1  |
| IL-23 R               | 2.1  | 2.8  | 3.9   |
| Kremen-1              | 4.9  | 17.4 | 28.3  |
| Lungkine/CXCL15       | 3.2  | 4.0  | 5.8   |
| Lymphotoxin $\beta$ R | 3.8  | 4.9  | 7.3   |
| MAdCAM-1              | 5.7  | 18.7 | 25.7  |
| MDC/CCL22             | 14.5 | 19.5 | 43.5  |
| Osteoactivin          | 2.4  | 3.3  | 5.9   |
| Osteoprotegerin       | 29.0 | 44.0 | 81.5  |
| PDGF C                | 4.7  | 9.5  | 13.0  |
| PDGF R $\alpha$       | 4.4  | 6.3  | 8.2   |
| PIGF 2                | 5.0  | 14.3 | 22.7  |
| Prolactin             | 2.3  | 3.2  | 4.6   |
| P-selectin            | 2.2  | 2.7  | 4.1   |
| Resistin              | 13.4 | 20.6 | 29.6  |
| SIGIRR                | 3.5  | 24.5 | 32.3  |
| Soggy-1               | 1.3  | 3.5  | 4.8   |
| Spinesin Ectodomain   | 1.6  | 2.0  | 4.5   |
| TGF- $\beta$ 3        | 6.0  | 22.1 | 35.6  |
| TGF- $\beta$ RII      | 2.5  | 3.5  | 4.7   |
| TIMP-2                | 4.1  | 6.7  | 7.8   |
| TIMP-4                | 24.1 | 44.1 | 52.7  |
| TLiA/TNFSF15          | 6.7  | 16.0 | 31.0  |
| TNF RI                | 1.9  | 6.8  | 13.1  |
| TNF- $\beta$          | 1.5  | 3.6  | 5.7   |
| TRANCE/TNFSF11        | 8.8  | 19.0 | 36.0  |
| TWEAK                 | 30.0 | 62.0 | 70.0  |
| TWEAK R               | 2.9  | 4.0  | 4.9   |
| WIF-1                 | 15.3 | 34.7 | 57.3  |
