# Supplementary material for: Transcriptomic Evaluation of Pulmonary Fibrosis-Related Genes: Utilization of Transgenic Mice with Modifying p38 Signal in the Lungs
Source: MDPI journal article supplement (doi:10.3390/ijms21186746), 2020-09-14
Supplement: s1 [file s1]

**Supplementary Table S4.** DEGs altered by BLM in p38-DN group.

| Name (symbol) | Fold change | FDR p-value correction | DN_PBS_Rep1 - RPKM | DN_PBS_Rep2 - RPKM | DN_PBS_Rep3 - RPKM | DN_BLM_Rep1 - RPKM | DN_BLM_Rep2 - RPKM | DN_BLM_Rep3 - RPKM |
|---------------|-------------|------------------------|--------------------|--------------------|--------------------|--------------------|--------------------|--------------------|
| Srp54a        | 176.258     | 0.00318                | 0                  | 0                  | 0                  | 5.80514            | 0                  | 1.2457             |
| Bcl2a1b       | 114.443     | 1.5E-06                | 0                  | 0.64171            | 0.30174            | 5.52783            | 4.05585            | 1.87683            |
| Ighv5-4       | 107.489     | 0.00405                | 0                  | 0                  | 0                  | 1.86429            | 5.39777            | 1.11014            |
| Gm10718       | 87.8238     | 0.00179                | 0.12806            | 0                  | 0.12067            | 4.30484            | 4.36677            | 3.81049            |
| Gm10719       | 87.0811     | 0.00084                | 0                  | 0                  | 0.04565            | 2.465              | 1.36888            | 3.47303            |
| Chst5         | 77.4373     | 5.9E-05                | 0                  | 0                  | 0                  | 0.47205            | 0.42833            | 0.21623            |
| Chodl         | 76.9338     | 5.2E-05                | 0                  | 0                  | 0                  | 0.29038            | 0.11121            | 0.24702            |
| Igkv6-32      | 71.3888     | 0.01055                | 0                  | 0                  | 0                  | 2.3813             | 3.71431            | 0.32227            |
| Ighv5-9       | 66.473      | 0.01317                | 0                  | 0                  | 0                  | 1.89551            | 1.42286            | 1.69309            |
| Krt5          | 64.4926     | 0.01866                | 0                  | 0                  | 0                  | 0                  | 0.11639            | 0.75403            |
| Nog           | 62.1541     | 0.00126                | 0                  | 0                  | 0                  | 0.51419            | 0.30076            | 0.34794            |
| Gm10721       | 59.387      | 0.00081                | 0.52142            | 0.11195            | 0                  | 4.85579            | 1.90504            | 5.11301            |
| Ccl3          | 53.2722     | 0.00676                | 0                  | 0                  | 0                  | 1.34467            | 0.66552            | 0.15398            |
| Lrrc15        | 50.542      | 0.00856                | 0                  | 0                  | 0                  | 0.04476            | 0.19201            | 0.06664            |
| Prss22        | 45.875      | 0.00443                | 0                  | 0                  | 0                  | 0.17967            | 0.51377            | 0.44577            |
| Igkv2-137     | 44.4187     | 0.02062                | 0                  | 0                  | 0                  | 0.94889            | 3.73099            | 0.47087            |
| Igkv8-24      | 43.8552     | 0.0485                 | 0                  | 0                  | 0                  | 1.30245            | 1.86224            | 0.64631            |
| Saa3          | 43.1204     | 1.2E-07                | 0                  | 0.08622            | 0.22073            | 11.0366            | 4.62971            | 1.26733            |
| Gm10801       | 41.3367     | 2.2E-08                | 0.51909            | 0.29721            | 0.16304            | 14.1486            | 9.60913            | 18.2545            |
| Sectm1a       | 40.5833     | 0.01446                | 0                  | 0                  | 0                  | 0.18731            | 0.25108            | 0.34856            |
| Wnt10a        | 40.2727     | 0.0116                 | 0                  | 0                  | 0                  | 0.12842            | 0.17213            | 0.23896            |
| C430002N11Rik | 40.1223     | 0.02727                | 0                  | 0                  | 0                  | 0.03753            | 0.40249            | 0.16762            |
| Ighv1-53      | 39.8135     | 0.04913                | 0                  | 0                  | 0.23411            | 2.48306            | 2.42065            | 0                  |
| Gm10800       | 38.3819     | 9.8E-07                | 3.03905            | 1.92916            | 1.74307            | 93.7582            | 53.6824            | 97.9358            |
| Adamts4       | 36.4213     | 9.5E-15                | 0.01813            | 0.01557            | 0.05125            | 0.97187            | 0.81255            | 0.58853            |
| Tm4sf5        | 34.4253     | 0.03625                | 0                  | 0                  | 0                  | 0.21129            | 0.45315            | 0.31454            |
| Mmp12         | 34.0246     | 1.4E-10                | 0.01205            | 0.0414             | 0.02271            | 0.96344            | 0.85705            | 0.63564            |
| Frzb          | 31.9678     | 1.9E-07                | 0                  | 0.02314            | 0                  | 0.39163            | 0.52496            | 0.36439            |
| Thbs4         | 31.3749     | 2E-09                  | 0.02651            | 0                  | 0.04997            | 1.15632            | 0.90416            | 1.00415            |
| Gm21738       | 27.8503     | 1.5E-08                | 0.25612            | 0                  | 0.362              | 11.2857            | 5.11536            | 13.1635            |
| Cemip         | 27.2849     | 1.3E-13                | 0.02139            | 0.01837            | 0.01344            | 0.58297            | 0.56264            | 0.64607            |
| Ighg1         | 24.97       | 0.00264                | 0                  | 0                  | 0.06341            | 0.79477            | 0.91783            | 0.45506            |
| A2m           | 24.8999     | 0.00029                | 0                  | 0.01521            | 0                  | 0.22523            | 0.25878            | 0.16765            |
| Chl1          | 24.8557     | 6.8E-35                | 0.02838            | 0.03046            | 0.03342            | 1.08926            | 0.98837            | 0.75801            |
| Lcn2          | 21.8718     | 9.2E-12                | 0.6317             | 0.51397            | 0.90851            | 28.9079            | 20.9578            | 6.74525            |
| Gm26870       | 21.3429     | 1.2E-10                | 0.29156            | 0.36169            | 0.79365            | 12.5971            | 9.24767            | 13.8896            |
| Sprr1a        | 21.2436     | 0.00124                | 0                  | 0.09292            | 0                  | 1.57285            | 1.3704             | 0.43903            |
| Spp1          | 21.2347     | 9.5E-24                | 2.59294            | 1.63609            | 2.89202            | 73.6553            | 79.2421            | 35.0706            |
| Slc26a4       | 21.1033     | 4.7E-05                | 0.25524            | 0.02436            | 0.05345            | 3.29812            | 4.28278            | 1.57269            |
| Atg9b         | 18.7484     | 2.7E-13                | 0.0221             | 0.01898            | 0.0833             | 0.8634             | 1.05506            | 1.01631            |
| Igkv10-96     | 18.7259     | 0.00311                | 0.48584            | 0                  | 0.22889            | 6.40038            | 11.1235            | 2.2999             |
| H2-Eb2        | 17.1445     | 1.4E-06                | 0                  | 0.03391            | 0.0744             | 0.53802            | 1.00004            | 0.96113            |
| Megf10        | 17.0724     | 9.2E-09                | 0.0226             | 0                  | 0.01065            | 0.26691            | 0.2532             | 0.19868            |
| Ighg3         | 17.0438     | 0.04198                | 0                  | 0.06922            | 0                  | 0.29291            | 0.94231            | 0.76309            |
| Ighv1-72      | 17.0139     | 0.0292                 | 0.88088            | 0                  | 0                  | 4.20171            | 7.50952            | 1.78715            |
| Clec4n        | 16.531      | 9.2E-12                | 0.12283            | 0.10549            | 0.40508            | 5.97032            | 4.78676            | 2.24275            |
| Stra6l        | 15.5646     | 2.6E-06                | 0                  | 0.00783            | 0.02577            | 0.25674            | 0.31972            | 0.11096            |
| Gpnmb         | 15.3938     | 9.9E-17                | 0.53832            | 0.16952            | 0.52415            | 7.90693            | 12.3776            | 3.49487            |
| A430093F15Rik | 15.2094     | 0.00398                | 0.02796            | 0                  | 0                  | 0.25403            | 0.21793            | 0.15127            |
| Ighv1-19      | 14.3855     | 0.03948                | 0                  | 0                  | 0.40579            | 2.73889            | 1.46853            | 0.29124            |

|           |         |         |         |         |         |         |         |         |
|-----------|---------|---------|---------|---------|---------|---------|---------|---------|
| Ighv1-64  | 14.3269 | 0.00355 | 0       | 0.18493 | 0.2029  | 2.15199 | 4.61538 | 1.4562  |
| Svop      | 14.1302 | 0.00362 | 0       | 0.01644 | 0       | 0.13913 | 0.11189 | 0.15534 |
| Ighv3-6   | 14.1053 | 0.00145 | 0.49833 | 0.21399 | 0       | 3.62205 | 8.25373 | 2.02203 |
| Eya4      | 14.0485 | 0.00347 | 0       | 0.01787 | 0       | 0.15121 | 0.14188 | 0.14069 |
| Clec7a    | 13.8319 | 1.2E-18 | 0.19835 | 0.3407  | 0.6853  | 8.62004 | 8.79281 | 3.44287 |
| Lama1     | 13.7314 | 8.6E-20 | 0.10995 | 0.05508 | 0.1554  | 1.73149 | 1.61574 | 1.8217  |
| Ighv8-8   | 13.4211 | 0.00814 | 0.2436  | 0.41842 | 0       | 1.77055 | 8.06929 | 2.6358  |
| Igkv1-110 | 13.0121 | 0.01292 | 0.43495 | 0.56032 | 0.61476 | 4.74208 | 16.7387 | 2.05901 |
| Acod1     | 13.0067 | 0.00641 | 0.03325 | 0.02855 | 0       | 0.69476 | 0.35631 | 0.08994 |
| Timp1     | 12.8862 | 1.1E-06 | 0.58924 | 0.75909 | 1.11045 | 13.4731 | 9.56812 | 6.90709 |
| Ighv10-3  | 12.7994 | 0.0225  | 0       | 0       | 0.21797 | 1.89149 | 2.92982 | 0       |
| Gm14548   | 12.7159 | 0.02762 | 0       | 0       | 0.03862 | 0.4468  | 0.55898 | 0.33257 |
| Pdyn      | 12.5316 | 0.01534 | 0.03021 | 0       | 0       | 0.16467 | 0.26487 | 0.12257 |
| Ccnb1     | 12.4927 | 6.8E-09 | 0.04136 | 0.05328 | 0.03897 | 0.78913 | 0.74548 | 0.67129 |
| Cxcl10    | 12.0376 | 2.3E-05 | 0.10847 | 0.13973 | 0.25551 | 3.35062 | 2.48343 | 0.80688 |
| Pla1a     | 11.9083 | 2E-06   | 0       | 0.07596 | 0.08334 | 0.76339 | 0.77554 | 1.01683 |
| Hist1h2bl | 11.6783 | 0.02909 | 0       | 0.39316 | 0       | 2.28755 | 3.34508 | 0.61917 |
| Ch25h     | 11.4146 | 3.6E-07 | 0.0646  | 0.05548 | 0.66956 | 1.64334 | 3.90209 | 1.74743 |
| Cd177     | 10.7203 | 5.8E-08 | 0.49131 | 0.15823 | 0.37615 | 4.43589 | 4.42775 | 4.40243 |
| Morc1     | 10.645  | 0.04114 | 0       | 0.02456 | 0       | 0.10391 | 0.195   | 0.15469 |
| Ptger3    | 10.5206 | 2.7E-05 | 0.01533 | 0.02633 | 0.04334 | 0.52933 | 0.3585  | 0.24884 |
| Ighg2b    | 10.45   | 0.00028 | 0.13026 | 0.19577 | 0.15342 | 1.7456  | 3.36306 | 1.2773  |
| Syt12     | 10.3253 | 5.1E-06 | 0.09447 | 0.05409 | 0.11868 | 0.67231 | 0.85901 | 0.48978 |
| Cxcl9     | 10.2175 | 0.00255 | 0.05783 | 0       | 0.05449 | 0.57795 | 0.73246 | 0.15643 |
| Celf5     | 10.0959 | 2.9E-05 | 0       | 0.0337  | 0.03697 | 0.35647 | 0.21662 | 0.21227 |
| Arg1      | 10.0911 | 8.3E-05 | 0       | 0.15223 | 0.27836 | 1.44937 | 2.36014 | 1.59826 |
| Reg3g     | 9.7685  | 0.00098 | 0.16501 | 0.60229 | 0.11661 | 0.52472 | 3.53686 | 5.97013 |
| Ccl7      | 9.65168 | 0.00058 | 0.10887 | 0       | 0.20518 | 1.187   | 1.27288 | 1.47256 |
| BC030867  | 9.46972 | 0.00512 | 0       | 0.0247  | 0.0271  | 0.31358 | 0.2522  | 0.11671 |
| Trem2     | 9.40588 | 6.7E-25 | 0.17632 | 0.15143 | 0.18275 | 1.87428 | 2.11296 | 1.83629 |
| Ereg      | 9.39191 | 4.9E-05 | 0       | 0       | 0.07963 | 0.24952 | 0.4734  | 0.22859 |
| Piwil2    | 9.38846 | 0.00412 | 0       | 0.03049 | 0       | 0.16127 | 0.06918 | 0.21607 |
| Fst       | 9.28326 | 4.7E-10 | 0.14926 | 0.19229 | 0.28129 | 2.47495 | 2.50859 | 2.06933 |
| Gzmb      | 9.25948 | 0.02332 | 0.0615  | 0       | 0.1159  | 1.56453 | 0.29959 | 0.24955 |
| Tnc       | 9.25517 | 2.2E-16 | 0.74057 | 1.14677 | 1.43793 | 11.9582 | 11.9598 | 13.158  |
| Ccr5      | 9.1774  | 9.3E-13 | 0.19646 | 0.16873 | 0.25332 | 3.20349 | 2.13571 | 1.25868 |
| Kcnj10    | 9.05407 | 0.00058 | 0.04839 | 0       | 0       | 0.17584 | 0.23571 | 0.13089 |
| Gm21541   | 8.82262 | 0.01536 | 0       | 0       | 2.64466 | 12.5679 | 10.4497 | 0       |
| Tnfsf8    | 8.70841 | 3.4E-05 | 0       | 0.01967 | 0.10792 | 0.45787 | 0.69186 | 0.24786 |
| Gp2       | 8.67676 | 0.00458 | 0.08729 | 0       | 0.08226 | 0.07931 | 0.59535 | 1.12166 |
| Iglc2     | 8.59316 | 0.00381 | 0.1425  | 0.36714 | 0.26854 | 4.0134  | 3.74845 | 1.15639 |
| Ccl6      | 8.57893 | 2.8E-06 | 1.06884 | 1.37693 | 3.11297 | 23.7918 | 18.981  | 7.09683 |
| Clec5a    | 8.57781 | 3.2E-11 | 0.06813 | 0.07802 | 0.1284  | 1.238   | 1.10631 | 0.5529  |
| Sfrp1     | 8.55417 | 2.8E-20 | 0.99734 | 0.9936  | 1.52242 | 14.8787 | 12.7875 | 8.71419 |
| Has2      | 8.49316 | 2.2E-06 | 0       | 0.08838 | 0.09697 | 0.5236  | 0.72191 | 0.25055 |
| Hist1h2bf | 8.27947 | 0.00675 | 0       | 0.16247 | 0.53475 | 2.9218  | 3.50181 | 1.2793  |
| Ackr1     | 8.26436 | 0.0196  | 0.06207 | 0       | 0.05849 | 0.50754 | 0.60473 | 0.25185 |
| Ddias     | 8.18246 | 2.6E-06 | 0.02356 | 0.02023 | 0.13318 | 0.8347  | 0.68853 | 0.25489 |
| Igkv1-135 | 8.15066 | 0.00614 | 0       | 0.57028 | 0.41712 | 2.81536 | 9.05717 | 0.89811 |
| Trip13    | 8.09385 | 0.00303 | 0.02579 | 0       | 0.07289 | 0.39827 | 0.25123 | 0.34876 |
| Msr1      | 8.07855 | 3.5E-11 | 0.10997 | 0.14167 | 0.09067 | 1.43627 | 1.31251 | 0.70652 |
| Hist1h2bk | 8.03271 | 0.00354 | 0.91605 | 0.78673 | 0.69053 | 9.4879  | 6.24742 | 1.98238 |
| AA467197  | 7.96657 | 1.3E-05 | 0.07249 | 0.24903 | 0.13661 | 1.91001 | 1.90694 | 0.88243 |
| Upk3a     | 7.91822 | 0.02079 | 0.07885 | 0       | 0.0743  | 0.71639 | 0.53775 | 0.31994 |
| Tnfrsf9   | 7.86259 | 0.02404 | 0.16019 | 0       | 0.06038 | 0.7277  | 0.78035 | 0.56333 |
| Mmp8      | 7.82175 | 0.00538 | 0.03596 | 0.03089 | 0.06777 | 0.62079 | 0.38541 | 0.34048 |

|               |         |         |         |         |         |         |         |         |
|---------------|---------|---------|---------|---------|---------|---------|---------|---------|
| Ighv1-81      | 7.79854 | 0.00723 | 0.24845 | 0.42676 | 2.80934 | 2.7088  | 23.7224 | 4.70463 |
| Bcl2a1a       | 7.76584 | 0.04353 | 0.31944 | 0.27435 | 0       | 1.54788 | 1.76362 | 0.43206 |
| Fn1           | 7.72741 | 3.1E-12 | 3.75399 | 4.89697 | 9.2546  | 65.4268 | 59.8135 | 38.6511 |
| Clec4e        | 7.70697 | 0.00081 | 0.01756 | 0.06034 | 0.01655 | 0.46279 | 0.42782 | 0.07127 |
| Ctss          | 7.6613  | 6.4E-16 | 8.7336  | 7.83161 | 13.3728 | 101.112 | 115.81  | 61.7554 |
| Dcstamp       | 7.6415  | 0.00616 | 0.04376 | 0.03758 | 0.08246 | 0.31804 | 0.63947 | 0.65101 |
| Egr3          | 7.63795 | 0.00013 | 0.12317 | 0.21157 | 0.34819 | 0.83933 | 3.96023 | 1.66599 |
| Ccl9          | 7.51758 | 4.6E-11 | 0.17184 | 0.31976 | 0.53973 | 3.85103 | 3.54369 | 1.66566 |
| Col24a1       | 7.50475 | 2.6E-08 | 0.12587 | 0.04914 | 0.05391 | 0.71736 | 0.62433 | 0.72743 |
| Adamts19      | 7.48541 | 0.00444 | 0.01869 | 0.01605 | 0.01761 | 0.16981 | 0.21851 | 0.1264  |
| Oas3          | 7.48193 | 1.6E-07 | 0.06674 | 0.07164 | 0.12577 | 0.98529 | 0.82901 | 0.33849 |
| Egr2          | 7.47538 | 1.1E-09 | 0.07699 | 0.30858 | 0.29019 | 1.51563 | 3.55062 | 1.24964 |
| Tnip3         | 7.43796 | 5.7E-07 | 0.0959  | 0.06589 | 0.07229 | 1.13264 | 0.59795 | 0.41505 |
| 2410018L13Rik | 7.41942 | 0.00496 | 0.02116 | 0.01817 | 0.01994 | 0.15377 | 0.22674 | 0.25754 |
| Klrc1         | 7.41857 | 0.01937 | 0.13187 | 0       | 0.12425 | 1.07826 | 0.42825 | 0.05945 |
| Gm26545       | 7.28633 | 0.03337 | 0.04995 | 0.0429  | 0       | 0.31766 | 0.24331 | 0.40533 |
| Fcrlb         | 7.24959 | 0.03243 | 0.06792 | 0       | 0.064   | 0.37024 | 0.4632  | 0.45931 |
| Ms4a6d        | 7.18464 | 0.00226 | 0.05026 | 0.1295  | 0.09472 | 1.23301 | 0.83251 | 0.47589 |
| Cdh3          | 7.18418 | 0.00778 | 0.01989 | 0.01708 | 0.01874 | 0.14458 | 0.27133 | 0.10762 |
| Isg15         | 7.14778 | 3.6E-08 | 0.69212 | 0.89163 | 1.19564 | 13.2054 | 7.1928  | 3.12042 |
| Shcbp1        | 7.08655 | 0.003   | 0.01385 | 0.0119  | 0.02611 | 0.21397 | 0.17546 | 0.09369 |
| Lilrb4a       | 7.08351 | 2.8E-10 | 0.87793 | 0.53059 | 0.61278 | 6.8538  | 5.79738 | 4.8377  |
| Igkv1-117     | 7.07736 | 0.00486 | 0.21586 | 0.92694 | 1.017   | 11.1788 | 10.5155 | 0.87588 |
| Cdca3         | 7.06658 | 4.8E-05 | 0.06086 | 0.10453 | 0.08602 | 1.02289 | 0.97831 | 0.24693 |
| Lrg1          | 6.94463 | 5.1E-22 | 2.45292 | 2.27296 | 3.22367 | 23.8694 | 22.0745 | 20.0806 |
| Gas2l3        | 6.94034 | 2.2E-08 | 0.03877 | 0.14429 | 0.07306 | 1.05674 | 0.79324 | 0.40203 |
| Tnfrsf8       | 6.87219 | 0.01457 | 0.05042 | 0.02165 | 0       | 0.20616 | 0.29476 | 0.1364  |
| Shc4          | 6.86933 | 8.7E-05 | 0.01055 | 0.01813 | 0.0895  | 0.26849 | 0.20565 | 0.28549 |
| Psrc1         | 6.81284 | 1.1E-09 | 0.34744 | 0.37299 | 0.38195 | 2.47272 | 3.5261  | 3.05453 |
| Il1rn         | 6.81107 | 1.4E-07 | 0.11188 | 0.09608 | 0.23719 | 1.75338 | 0.92649 | 0.98356 |
| Rgs16         | 6.74813 | 0.0025  | 0.18642 | 0.1601  | 0.35132 | 2.7777  | 2.61542 | 2.72313 |
| C3ar1         | 6.74447 | 2E-08   | 0.12154 | 0.31316 | 0.40085 | 2.79752 | 3.15781 | 1.04115 |
| Jchain        | 6.74372 | 0.00105 | 1.3166  | 1.81514 | 1.69766 | 12.686  | 23.3594 | 5.38914 |
| Chrna7        | 6.58137 | 2.7E-06 | 0.01936 | 0.04988 | 0.10944 | 0.54522 | 0.54694 | 0.36655 |
| Hist1h3d      | 6.56353 | 0.00793 | 0.46718 | 1.06995 | 0.29348 | 7.2158  | 5.76548 | 3.37005 |
| Clca3a1       | 6.54254 | 4.5E-10 | 0.17893 | 0.11526 | 0.33721 | 2.07276 | 1.83048 | 1.17982 |
| Ckap2         | 6.47557 | 4.3E-13 | 0.13563 | 0.20966 | 0.28115 | 1.99621 | 1.7178  | 1.24739 |
| Cybb          | 6.44427 | 6.5E-11 | 0.57057 | 0.58029 | 1.00453 | 6.90281 | 7.62168 | 2.64011 |
| Gpr141        | 6.42948 | 0.00178 | 0.05081 | 0       | 0.07181 | 0.36927 | 0.44549 | 0.13743 |
| Col28a1       | 6.41584 | 2.2E-10 | 0.14226 | 0.22909 | 0.20108 | 1.42179 | 1.49    | 1.53934 |
| Fcgr1         | 6.37553 | 5.7E-05 | 0.16842 | 0.08679 | 0.31739 | 1.86681 | 1.21425 | 1.27565 |
| Cdkn1a        | 6.36126 | 2.6E-20 | 3.21683 | 3.97562 | 4.10312 | 30.3314 | 29.2772 | 26.5299 |
| Hist1h2bm     | 6.25556 | 0.00577 | 0.22889 | 0.78632 | 0.43136 | 5.40693 | 2.89907 | 1.85751 |
| Gdf15         | 6.21036 | 2.4E-05 | 0.14127 | 0.08088 | 0.31059 | 1.32624 | 1.74334 | 0.95533 |
| Wisp1         | 6.19064 | 1.4E-07 | 0.22126 | 0.1493  | 0.34251 | 2.18255 | 2.0479  | 1.13292 |
| Hist1h2bg     | 6.18986 | 0.00019 | 1.09695 | 1.57016 | 2.58406 | 16.6105 | 14.428  | 7.41836 |
| Tmem37        | 6.1042  | 0.00016 | 0.19956 | 0.28565 | 0.3134  | 3.02183 | 2.0739  | 0.98968 |
| Glp2r         | 6.07253 | 0.03635 | 0.015   | 0.02576 | 0.02826 | 0.14988 | 0.1315  | 0.08114 |
| Fcgr3         | 5.99221 | 7.5E-08 | 0.55258 | 0.73344 | 0.99403 | 5.70509 | 5.92209 | 3.1934  |
| Cthrc1        | 5.9675  | 0.00249 | 0.11785 | 0.15182 | 0.05552 | 0.96364 | 0.80372 | 0.71727 |
| Elin          | 5.96554 | 1.1E-18 | 16.4813 | 17.8156 | 15.7183 | 114.745 | 122.237 | 120.345 |
| Cenpn         | 5.94828 | 6.2E-05 | 0.13237 | 0.02274 | 0.09979 | 0.84187 | 0.61905 | 0.35808 |
| Pif1          | 5.92809 | 0.00114 | 0.05962 | 0.01707 | 0.03745 | 0.30696 | 0.30981 | 0.21504 |
| Sirpb1a       | 5.90731 | 0.01866 | 0.1142  | 0.06538 | 0.03587 | 0.51876 | 0.5563  | 0.30891 |
| Cgref1        | 5.90704 | 0.00035 | 0.08377 | 0.07195 | 0.11841 | 0.76112 | 0.48971 | 0.79314 |
| Kif18b        | 5.9029  | 0.00034 | 0.14649 | 0.20968 | 0.13803 | 0.8429  | 0.92767 | 0.66042 |



|               |         |         |         |         |         |         |         |         |
|---------------|---------|---------|---------|---------|---------|---------|---------|---------|
| I830077J02Rik | 5.88032 | 0.00065 | 0.09132 | 0.13071 | 0.02868 | 0.96793 | 0.7414  | 0.16468 |
| Ccr1          | 5.80853 | 0.00036 | 0.06157 | 0.15862 | 0.17403 | 1.59415 | 1.04969 | 0.24981 |
| Igkv8-30      | 5.74121 | 0.03485 | 1.18489 | 0.20352 | 1.11648 | 5.59793 | 9.4662  | 1.60261 |
| Osm           | 5.73287 | 0.01286 | 0       | 0.0989  | 0.03617 | 0.48823 | 0.33657 | 0.20766 |
| Il6           | 5.72188 | 0.04025 | 0.03592 | 0       | 0.10153 | 0.65265 | 0.20996 | 0.09716 |
| Gm4841        | 5.70838 | 0.02156 | 0       | 0.02639 | 0.14477 | 0.7538  | 0.23951 | 0.29093 |
| Etv4          | 5.69208 | 0.00172 | 0.16857 | 0.12065 | 0       | 0.53604 | 0.84855 | 0.684   |
| Gm11427       | 5.68773 | 0.0129  | 0.08845 | 0       | 0.1389  | 0.34821 | 0.6032  | 0.23925 |
| Foxp3         | 5.66093 | 0.01181 | 0.34979 | 0.30041 | 0.2884  | 0.41712 | 0.4899  | 0.97579 |
| Ano5          | 5.64253 | 0.0316  | 0       | 0.00958 | 0.03152 | 0.12158 | 0.14125 | 0.03017 |
| Gm6377        | 5.62568 | 0.02227 | 0.0624  | 0.05359 | 0       | 0.42522 | 0.36479 | 0.0844  |
| Cxcl15        | 5.60906 | 9.8E-06 | 4.96103 | 4.57761 | 10.9719 | 68.4296 | 58.6805 | 15.1946 |
| Cxcl13        | 5.60468 | 0.00422 | 0.2275  | 0.32564 | 0.14291 | 2.06693 | 1.40377 | 1.43594 |
| Troap         | 5.55759 | 0.00678 | 0       | 0.06616 | 0.25407 | 0.76993 | 0.82563 | 0.57309 |
| Ccl17         | 5.54529 | 0.00264 | 0.33933 | 0.14571 | 1.11909 | 4.00786 | 3.96723 | 2.75374 |
| Ube2c         | 5.51242 | 0.00283 | 0.06708 | 0.05761 | 0.25284 | 1.34085 | 0.81697 | 0.40829 |
| Mis18bp1      | 5.47775 | 5.3E-05 | 0.04366 | 0.01875 | 0.08228 | 0.40657 | 0.40409 | 0.14762 |
| C1qb          | 5.46918 | 4.3E-10 | 4.24816 | 4.54337 | 6.34426 | 33.1348 | 34.8294 | 30.4637 |
| 2810417H13Rik | 5.46173 | 0.00095 | 0.65229 | 0.4824  | 0.46098 | 1.30051 | 1.11215 | 0.78422 |
| Tnfrsf11b     | 5.37691 | 3.7E-05 | 0.09284 | 0.18605 | 0.08748 | 1.18089 | 0.78392 | 0.50228 |
| Nrcam         | 5.24978 | 6.1E-09 | 0.35661 | 0.27663 | 0.34686 | 2.5397  | 2.43205 | 1.36918 |
| Tnf           | 5.21138 | 0.01783 | 0.05321 | 0       | 0.20054 | 0.67679 | 0.51839 | 0.43179 |
| Csmd1         | 5.17652 | 5.3E-14 | 0.08249 | 0.0551  | 0.09932 | 0.57873 | 0.46434 | 0.42768 |
| Slc7a8        | 5.14172 | 2.2E-06 | 0.21624 | 0.09285 | 0.14263 | 1.27699 | 1.05337 | 0.49719 |
| Stag3         | 5.12161 | 0.03167 | 0.03042 | 0.02613 | 0       | 0.12438 | 0.1482  | 0.10287 |
| Cldn2         | 5.1147  | 0.0136  | 0.13114 | 0.02253 | 0.04943 | 0.30978 | 0.53662 | 0.42569 |
| Trp53cor1     | 5.11297 | 0.00168 | 0.08851 | 0.10135 | 0.0556  | 0.40206 | 0.57486 | 0.43893 |
| RP23-181A8.7  | 5.08356 | 0.00278 | 0.02964 | 0.07637 | 0.08379 | 0.56556 | 0.25992 | 0.40092 |
| Slfn2         | 5.06995 | 2.6E-05 | 3.19691 | 3.64581 | 4.83953 | 14.3323 | 15.0118 | 12.3339 |
| Ly6c2         | 5.04494 | 0.00048 | 0.22279 | 0.43735 | 0.71977 | 1.56151 | 1.82954 | 0.99011 |
| Lair1         | 5.03314 | 5.9E-06 | 0.12833 | 0.12024 | 0.21986 | 1.31436 | 1.18212 | 0.42605 |
| Ms4a1         | 5.03171 | 0.03855 | 0.22552 | 0.12105 | 0.18594 | 0.79399 | 0.8377  | 0.74351 |
| Tk1           | 5.02235 | 0.00171 | 0.72142 | 0.86453 | 1.45439 | 2.3474  | 1.87975 | 1.45227 |
| Igha          | 5.01662 | 3.9E-06 | 11.8652 | 15.1309 | 15.677  | 79.1432 | 140.122 | 47.835  |
| Ctla4         | 5.00656 | 0.01779 | 0.07486 | 0.06429 | 0.07053 | 0.40806 | 0.36466 | 0.55685 |
| Serpina3i     | 4.9795  | 0.00034 | 0.27448 | 0.10103 | 0.22169 | 0.99753 | 0.76407 | 1.11375 |
| Hpgds         | 4.97885 | 1.1E-06 | 0.17023 | 0.10443 | 0.13749 | 0.99427 | 0.99513 | 0.49338 |
| Gm2115        | 4.97437 | 0.03366 | 0.01188 | 0       | 0.05598 | 0.09715 | 0.21994 | 0.09642 |
| C1qc          | 4.94844 | 2.3E-08 | 1.30969 | 1.62903 | 1.87241 | 10.5041 | 10.2961 | 7.94083 |
| Ms4a6c        | 4.92336 | 3.1E-07 | 0.46794 | 0.40188 | 0.96203 | 3.47849 | 4.18608 | 1.43844 |
| S100a14       | 4.9226  | 5.3E-08 | 0.85844 | 0.73726 | 0.61856 | 4.08319 | 4.28022 | 4.78091 |
| Ccl5          | 4.92124 | 0.04043 | 0.18168 | 0.31207 | 0.68478 | 5.11709 | 1.32758 | 0.7372  |
| Gtse1         | 4.89393 | 1.2E-07 | 0.2564  | 0.08258 | 0.302   | 1.33947 | 1.62373 | 0.78028 |
| Ccna2         | 4.89303 | 4E-07   | 0.12815 | 0.14675 | 0.32201 | 1.76589 | 1.41504 | 0.86666 |
| Gcnt4         | 4.88469 | 0.00352 | 0.05137 | 0.04412 | 0.01613 | 0.24891 | 0.25024 | 0.18528 |
| Plau          | 4.87487 | 3.8E-07 | 0.52109 | 0.47949 | 0.42086 | 3.31403 | 3.08238 | 2.16472 |
| Hist1h1a      | 4.8674  | 1.3E-05 | 1.35837 | 1.04995 | 0.89597 | 7.89855 | 5.42611 | 6.24667 |
| Atp6v0d2      | 4.86534 | 3.8E-06 | 0.3532  | 0.52395 | 0.6051  | 4.37586 | 3.50371 | 1.12914 |
| Cd3g          | 4.85869 | 0.00063 | 0.16006 | 0.11456 | 0.07541 | 1.11492 | 0.70176 | 0.28866 |
| Socs3         | 4.84946 | 8.3E-06 | 3.71032 | 3.16064 | 3.80879 | 18.472  | 11.2855 | 29.1718 |
| Cdsn          | 4.82409 | 0.02573 | 0.03256 | 0.11187 | 0       | 0.4438  | 0.25382 | 0.22022 |
| Icos          | 4.8236  | 0.00032 | 0.12712 | 0.06551 | 0.11979 | 0.71609 | 0.66882 | 0.44705 |
| Htr7          | 4.81792 | 0.00699 | 0       | 0.0661  | 0.12088 | 0.39628 | 0.34996 | 0.38172 |
| Cd300lb       | 4.81172 | 0.00224 | 0.08969 | 0.1027  | 0.16902 | 1.005   | 0.72819 | 0.40436 |
| Adamts12      | 4.78764 | 1.1E-06 | 0.36371 | 0.32438 | 0.22408 | 1.97    | 2.37149 | 1.13524 |
| Lilra5        | 4.77444 | 0.03958 | 0.04135 | 0.07103 | 0.07793 | 0.48839 | 0.48344 | 0.16778 |

|               |         |         |         |         |         |         |         |         |
|---------------|---------|---------|---------|---------|---------|---------|---------|---------|
| Wfdc17        | 4.73545 | 0.02354 | 0       | 0.98363 | 0.46251 | 3.27038 | 4.78226 | 0.88519 |
| Fcer1g        | 4.7156  | 5.9E-06 | 1.29714 | 1.54249 | 2.44451 | 12.873  | 11.9573 | 5.66817 |
| Ptafr         | 4.70885 | 6.9E-10 | 0.2158  | 0.32949 | 0.76819 | 2.87563 | 2.92016 | 1.55669 |
| Serpina3n     | 4.70389 | 4.3E-07 | 3.21113 | 4.89877 | 7.5644  | 37.8503 | 30.7092 | 19.6015 |
| Ccne1         | 4.68948 | 0.00309 | 0.03276 | 0.16881 | 0.06174 | 0.65481 | 0.57452 | 0.35448 |
| Cd52          | 4.67556 | 0.00042 | 1.02856 | 0.75717 | 1.59224 | 8.87775 | 6.80006 | 2.98109 |
| Gpr176        | 4.64761 | 0.03805 | 0.04473 | 0.03842 | 0.0843  | 0.75188 | 0.69733 | 0.24201 |
| Oas1g         | 4.63997 | 0.00226 | 0.26088 | 0.25606 | 0.52675 | 1.3544  | 1.77918 | 1.71383 |
| Fbxw10        | 4.63491 | 0.00989 | 0.08667 | 0.11165 | 0.04083 | 0.43307 | 0.40108 | 0.5861  |
| Ly86          | 4.62586 | 0.00039 | 0.8747  | 0.90146 | 0.8242  | 6.35766 | 6.2211  | 2.48444 |
| Mab21l3       | 4.60875 | 0.00665 | 0.07247 | 0.02075 | 0.06829 | 0.35117 | 0.35304 | 0.19604 |
| Rhof          | 4.59969 | 0.00023 | 0.3411  | 0.3255  | 0.58925 | 1.20518 | 0.96006 | 0.79455 |
| Ccl8          | 4.59239 | 0.02351 | 0.34132 | 0.73284 | 0.32162 | 4.80666 | 2.66035 | 0.69248 |
| Csf2rb2       | 4.58065 | 7.5E-08 | 0.47272 | 0.60086 | 0.6236  | 3.1954  | 4.14508 | 2.02042 |
| Scd1          | 4.57793 | 4.1E-07 | 21.4232 | 17.7794 | 28.0368 | 149.945 | 156.946 | 72.0492 |
| Prrx2         | 4.57244 | 0.00515 | 0.08894 | 0.15277 | 0.0419  | 0.76768 | 0.30329 | 0.60149 |
| Tlr8          | 4.54314 | 0.00074 | 0.12159 | 0.06266 | 0.25207 | 1.08265 | 0.99513 | 0.32892 |
| Gatm          | 4.53841 | 9.5E-05 | 0.05812 | 0.32444 | 0.27382 | 1.45211 | 1.41561 | 0.82539 |
| H19           | 4.53611 | 0.00415 | 0.1103  | 0.03158 | 0.27714 | 0.73487 | 0.78804 | 0.7459  |
| Pglyrp2       | 4.53043 | 0.00181 | 0.03897 | 0.03347 | 0.25702 | 0.77887 | 0.60743 | 0.42163 |
| Pdcd1lg2      | 4.53019 | 0.02066 | 0.21205 | 0.04553 | 0.19981 | 0.43349 | 0.77476 | 1.29066 |
| Tnfrsf26      | 4.52052 | 0.00049 | 0.0271  | 0.18619 | 0.10214 | 0.51705 | 1.00331 | 0.29323 |
| Cd200r1       | 4.50493 | 5E-05   | 0.30012 | 0.14729 | 0.1616  | 1.32443 | 1.12785 | 0.98583 |
| Rsad2         | 4.50059 | 3.8E-06 | 0.32239 | 0.38071 | 0.2848  | 2.3982  | 1.7472  | 1.33541 |
| Tns4          | 4.50027 | 0.03491 | 0.03376 | 0.04349 | 0.03181 | 0.35269 | 0.21377 | 0.04566 |
| P4ha3         | 4.49972 | 7.5E-08 | 0.25036 | 0.31058 | 0.28833 | 1.76914 | 1.3822  | 1.50497 |
| Igsf6         | 4.48071 | 0.01577 | 0.60143 | 0.51653 | 0.71784 | 2.47715 | 2.50012 | 0.705   |
| Ildr2         | 4.45257 | 1.6E-07 | 0.28537 | 0.31771 | 0.41829 | 2.19903 | 1.84326 | 1.38666 |
| Lif           | 4.45206 | 5E-07   | 0.48115 | 0.55096 | 0.47226 | 2.47715 | 3.26187 | 2.41327 |
| Ms4a14        | 4.45144 | 0.00077 | 0.10727 | 0.12897 | 0.18193 | 0.60423 | 0.79426 | 0.84148 |
| F830016B08Rik | 4.45058 | 0.00011 | 0.44966 | 0.56792 | 0.47355 | 4.1815  | 2.31933 | 1.71722 |
| Csf2rb        | 4.43861 | 7.5E-14 | 1.15325 | 1.27343 | 1.32816 | 6.66922 | 7.93648 | 4.90228 |
| Serpina3f     | 4.42197 | 0.00324 | 0.11425 | 0.13082 | 0.39472 | 1.66076 | 1.11308 | 0.82412 |
| Tlr13         | 4.4179  | 5.8E-06 | 0.25776 | 0.16603 | 0.38455 | 1.61977 | 1.94624 | 0.78441 |
| E2f8          | 4.4129  | 5.4E-05 | 0.11215 | 0.17888 | 0.10568 | 0.77151 | 0.96782 | 0.45508 |
| Pdcd1         | 4.40351 | 0.0132  | 0       | 0.11642 | 0.12773 | 0.41053 | 0.61633 | 0.36669 |
| C1qa          | 4.40346 | 3.9E-09 | 4.10882 | 4.17693 | 8.6914  | 27.6551 | 30.6364 | 28.8075 |
| Slc11a1       | 4.38599 | 2.7E-09 | 0.47076 | 0.22237 | 0.48794 | 1.98883 | 2.66017 | 1.59179 |
| Nuf2          | 4.3794  | 4.7E-05 | 0.08252 | 0.07087 | 0.09071 | 0.5248  | 0.53597 | 0.24182 |
| Olr1          | 4.37762 | 5.8E-06 | 0.1709  | 0.20968 | 0.27606 | 1.75234 | 0.95145 | 0.79251 |
| Neil3         | 4.36501 | 8.8E-05 | 0.09419 | 0.09438 | 0.11834 | 0.62758 | 0.55063 | 0.40344 |
| Plcd4         | 4.34824 | 0.00136 | 0.08045 | 0.04146 | 0.15161 | 0.58474 | 0.3919  | 0.32644 |
| Hmmr          | 4.34764 | 0.00354 | 0.12846 | 0.11032 | 0.13617 | 0.86074 | 0.67271 | 0.39093 |
| Sirpb1c       | 4.34722 | 0.01677 | 0.18379 | 0.13154 | 0.2309  | 0.97405 | 1.19375 | 0.4143  |
| Trac          | 4.34424 | 0.0034  | 0.74616 | 0.24031 | 1.05463 | 4.57598 | 4.45271 | 1.76612 |
| Tmem26        | 4.30956 | 0.00514 | 0.03452 | 0.04448 | 0.13012 | 0.39208 | 0.52136 | 0.18678 |
| Hist1h2ak     | 4.30351 | 0.00263 | 0.88761 | 0.95288 | 2.30001 | 6.8547  | 8.64783 | 3.90172 |
| Kifc1         | 4.2892  | 0.01682 | 0.61432 | 0.43966 | 0.77181 | 1.97674 | 1.97013 | 2.14647 |
| Igfbp2        | 4.28731 | 4.1E-06 | 3.82448 | 3.44679 | 5.33881 | 27.5404 | 24.4728 | 14.0495 |
| Cldn4         | 4.28297 | 9.2E-10 | 1.87285 | 1.52598 | 1.80998 | 8.42061 | 8.04734 | 10.0025 |
| Ifi211        | 4.27744 | 0.00199 | 0.68398 | 0.46155 | 0.46035 | 4.43878 | 2.47517 | 3.03966 |
| Ctsd          | 4.27719 | 1.1E-05 | 18.7324 | 21.0577 | 30.4785 | 138.547 | 142.283 | 64.0683 |
| Cd96          | 4.27632 | 0.03149 | 0.03993 | 0.03429 | 0.1505  | 0.5079  | 0.31123 | 0.37805 |
| Hist1h2ab     | 4.27622 | 0.00428 | 0.73749 | 0.95006 | 1.73728 | 5.86285 | 7.00556 | 2.99244 |
| Ngfr          | 4.25892 | 0.00052 | 0.02531 | 0.15214 | 0.07154 | 0.3219  | 0.51778 | 0.54766 |
| Sifn10-ps     | 4.24935 | 0.00052 | 0.16859 | 0.14479 | 0.09077 | 0.72208 | 1.03244 | 0.45604 |

|               |         |         |         |         |         |         |         |         |
|---------------|---------|---------|---------|---------|---------|---------|---------|---------|
| Prc1          | 4.24346 | 6.7E-05 | 0.29688 | 0.23676 | 0.35966 | 1.77249 | 1.51852 | 0.74571 |
| Slamf7        | 4.24053 | 1.7E-06 | 0.41918 | 0.40909 | 0.66428 | 3.35833 | 3.2486  | 1.39161 |
| Pilra         | 4.23402 | 0.00072 | 0.28223 | 0.14543 | 0.29253 | 1.58977 | 0.79741 | 0.9543  |
| Fcgr2b        | 4.21659 | 9.7E-12 | 0.81334 | 0.69852 | 1.36246 | 4.94004 | 5.679   | 3.44281 |
| Bcl11a        | 4.20001 | 0.0002  | 0.17872 | 0.23308 | 0.22453 | 0.9141  | 0.79967 | 0.78784 |
| Serpina3g     | 4.18275 | 0.00023 | 0.74572 | 0.32022 | 1.13208 | 3.1994  | 4.35924 | 3.24998 |
| Cep55         | 4.182   | 0.00011 | 0.18835 | 0.18872 | 0.17748 | 1.02677 | 1.2234  | 0.59443 |
| Tgfb1         | 4.17021 | 2.3E-12 | 2.70285 | 3.91544 | 4.87884 | 24.2904 | 19.7342 | 13.8741 |
| Thbs1         | 4.16698 | 7.8E-08 | 5.60036 | 10.2608 | 11.4066 | 38.1223 | 58.9844 | 38.262  |
| Car13         | 4.13992 | 0.00111 | 0.07587 | 0.19547 | 0.21446 | 1.13731 | 1.03481 | 0.30783 |
| Cd3e          | 4.11993 | 6.9E-06 | 0.32062 | 0.257   | 0.34239 | 1.94197 | 1.45773 | 0.78056 |
| Prr11         | 4.11641 | 0.00687 | 0.06842 | 0.17627 | 0.17191 | 1.05671 | 0.66657 | 0.40099 |
| Cd200r4       | 4.11109 | 0.01895 | 0.17058 | 0.18312 | 0.08037 | 1.0461  | 1.12179 | 0.11536 |
| Gpr132        | 4.10722 | 3.1E-06 | 0.42907 | 0.42991 | 0.60644 | 2.11156 | 3.20491 | 1.98279 |
| Ifi204        | 4.10229 | 0.00303 | 0.26939 | 0.16826 | 0.27691 | 1.31275 | 1.33615 | 0.9937  |
| Ccr2          | 4.09697 | 7.5E-08 | 0.98044 | 0.79772 | 1.32498 | 6.69255 | 6.49806 | 2.58238 |
| Slc7a11       | 4.08616 | 4.6E-05 | 0.08084 | 0.10099 | 0.1385  | 0.78792 | 0.67307 | 0.17893 |
| Ticrr         | 4.08374 | 8.8E-05 | 0.03736 | 0.03209 | 0.08802 | 0.26309 | 0.26392 | 0.25268 |
| B430306N03Rik | 4.07349 | 0.0001  | 0.088   | 0.04319 | 0.10661 | 0.51398 | 0.34295 | 0.32306 |
| Ogdhl         | 4.06951 | 0.02874 | 0       | 0.08686 | 0.04765 | 0.20675 | 0.36952 | 0.1368  |
| Trbc2         | 4.04491 | 0.0023  | 1.26023 | 1.40702 | 1.18747 | 6.52636 | 6.13908 | 2.21586 |
| Lhfpl2        | 4.02981 | 1.1E-07 | 0.30558 | 0.3077  | 0.48653 | 2.09665 | 2.39208 | 0.9549  |
| Il9r          | 4.01744 | 0.01087 | 0.10577 | 0.13626 | 0.06644 | 0.27228 | 0.60113 | 0.64376 |
| Cyp7b1        | 4.00276 | 6.7E-08 | 0.28183 | 0.62241 | 0.41732 | 2.30454 | 2.54973 | 1.68814 |
| Rad54b        | 3.99127 | 0.00582 | 0.10558 | 0.11658 | 0.04264 | 0.4111  | 0.36737 | 0.1632  |
| Ndnf          | 3.98308 | 1E-08   | 2.65572 | 2.66589 | 2.65678 | 17.1485 | 16.2134 | 6.68246 |
| Lrrn2         | 3.95862 | 4.6E-05 | 0.07277 | 0.10417 | 0.22858 | 0.61711 | 0.63812 | 0.72182 |
| Aspm          | 3.95852 | 1.6E-06 | 0.13544 | 0.13571 | 0.18434 | 0.88188 | 0.93835 | 0.3969  |
| Pdpn          | 3.94703 | 3E-07   | 2.92772 | 3.21516 | 4.47724 | 23.2857 | 19.0318 | 9.28295 |
| Lamc2         | 3.94211 | 1.9E-07 | 1.46449 | 1.49067 | 2.14658 | 10.5163 | 9.42763 | 4.68051 |
| Mreg          | 3.93814 | 1.2E-05 | 0.38182 | 0.36071 | 0.28782 | 1.97734 | 1.7484  | 1.23942 |
| Esco2         | 3.90091 | 0.0018  | 0.10874 | 0.07471 | 0.10246 | 0.63228 | 0.42377 | 0.29414 |
| Slfn9         | 3.89696 | 0.00037 | 0.17544 | 0.36412 | 0.52348 | 2.43076 | 1.93717 | 0.57345 |
| Oas2          | 3.87158 | 0.00168 | 0.70534 | 0.70673 | 0.73847 | 3.84502 | 3.22603 | 2.99451 |
| Iigp1         | 3.87054 | 0.00021 | 1.70447 | 1.43986 | 2.60658 | 13.4804 | 9.9094  | 4.27061 |
| Cx3cr1        | 3.86913 | 0.00483 | 0.54202 | 0.43226 | 0.63842 | 2.88437 | 2.64042 | 1.83277 |
| Eda2r         | 3.86697 | 5.8E-06 | 0.19245 | 0.24156 | 0.15344 | 1.02218 | 1.12498 | 0.66074 |
| Mki67         | 3.85728 | 9.8E-08 | 1.27418 | 0.93053 | 1.62533 | 7.53656 | 5.99593 | 4.33776 |
| 1500009L16Rik | 3.84874 | 0.03127 | 0.1462  | 0.12556 | 0.27552 | 1.19546 | 0.78341 | 0.59322 |
| Zwilch        | 3.8412  | 0.00192 | 0.14253 | 0.12241 | 0.21104 | 0.77697 | 0.47611 | 0.35801 |
| Hist1h1b      | 3.82573 | 0.00048 | 1.2911  | 0.80642 | 2.98611 | 9.27754 | 5.9464  | 7.46129 |
| Rad51ap1      | 3.82282 | 0.01787 | 0.05436 | 0.04668 | 0.08537 | 0.36217 | 0.33541 | 0.17155 |
| Nlrp1c-ps     | 3.82079 | 0.00099 | 0.3784  | 0.25998 | 0.35655 | 1.44392 | 1.67128 | 1.46715 |
| Ifi27l2a      | 3.81792 | 0.00093 | 1.50683 | 2.26469 | 2.30724 | 13.348  | 12.6622 | 3.05707 |
| Fscn1         | 3.80357 | 1.5E-09 | 1.56348 | 1.6163  | 1.99158 | 8.28625 | 8.18055 | 7.12724 |
| Il4i1         | 3.80141 | 0.00475 | 0.36337 | 0.20193 | 0.38267 | 1.3788  | 1.06206 | 1.06966 |
| Cd86          | 3.79817 | 1E-05   | 0.14292 | 0.22504 | 0.38157 | 1.29854 | 1.34607 | 0.80546 |
| Il2rb         | 3.78402 | 5.4E-05 | 0.28182 | 0.43029 | 0.70814 | 2.13372 | 3.14233 | 1.27058 |
| Mx1           | 3.78253 | 0.03595 | 0.26311 | 0.34922 | 0.45076 | 2.17313 | 1.42152 | 1.19699 |
| Kif14         | 3.77417 | 0.00769 | 0.05052 | 0.06508 | 0.11107 | 0.37482 | 0.45116 | 0.21636 |
| Mpeg1         | 3.77086 | 1.8E-07 | 3.8826  | 4.59574 | 6.31227 | 25.0217 | 30.066  | 13.3053 |
| Cd300lf       | 3.76718 | 0.00079 | 0.71135 | 0.64002 | 0.43089 | 2.83137 | 3.23424 | 2.40531 |
| Ptger4        | 3.75489 | 3E-11   | 0.38042 | 0.47317 | 0.84052 | 2.31213 | 1.82761 | 1.68553 |
| Bst1          | 3.75228 | 0.00082 | 0.39437 | 0.20322 | 0.44592 | 1.67207 | 1.7162  | 0.92455 |
| Figl1         | 3.73441 | 0.00061 | 0.10813 | 0.1393  | 0.16981 | 0.6877  | 0.91303 | 0.31688 |
| Col5a3        | 3.73412 | 0.00011 | 0.67881 | 0.65998 | 0.48273 | 2.23419 | 2.18371 | 3.58585 |



|               |         |         |         |         |         |         |         |         |
|---------------|---------|---------|---------|---------|---------|---------|---------|---------|
| Lgals3        | 3.73098 | 4E-07   | 2.11213 | 2.82173 | 3.93618 | 17.0575 | 15.868  | 7.55451 |
| Cd53          | 3.71894 | 0.00057 | 1.15142 | 1.89176 | 1.5095  | 9.32412 | 10.1938 | 2.09903 |
| F7            | 3.71785 | 2.7E-06 | 0.51602 | 0.56404 | 0.53044 | 2.38677 | 2.83369 | 2.09382 |
| Tpx2          | 3.70819 | 1.6E-07 | 0.46615 | 0.3523  | 0.33382 | 2.16843 | 1.70765 | 1.26098 |
| Wnt7a         | 3.70755 | 0.00024 | 0.08248 | 0.14167 | 0.23315 | 0.97417 | 0.66965 | 0.40904 |
| Kynu          | 3.70618 | 6.3E-05 | 0.14182 | 0.0609  | 0.16036 | 0.69581 | 0.60798 | 0.30692 |
| Gzma          | 3.68762 | 0.03887 | 0.59595 | 0.68243 | 1.49746 | 8.66321 | 2.22573 | 1.6121  |
| Lpxn          | 3.68295 | 0.00095 | 0.52064 | 0.26829 | 0.34341 | 1.89211 | 2.43482 | 0.77461 |
| 5430427O19Rik | 3.6826  | 0.00054 | 0.09292 | 0.15961 | 0.13134 | 0.52765 | 0.81479 | 0.40846 |
| Ncapg         | 3.68234 | 0.00012 | 0.09873 | 0.13779 | 0.18607 | 0.62794 | 0.84171 | 0.38394 |
| Itgb6         | 3.6816  | 3.7E-13 | 0.87073 | 0.97952 | 0.9938  | 5.11428 | 5.07806 | 2.72031 |
| Slc28a2       | 3.68073 | 3.4E-05 | 0.12435 | 0.30258 | 0.23433 | 1.20505 | 1.11052 | 0.53258 |
| Mmp14         | 3.67802 | 6.5E-17 | 2.65993 | 2.84388 | 3.75956 | 15.3385 | 15.0731 | 10.7196 |
| Cd8b1         | 3.67483 | 0.0469  | 0.29402 | 0.15151 | 0.05541 | 0.85483 | 0.85939 | 0.55675 |
| Tnfrsf12a     | 3.66419 | 2.2E-05 | 0.90558 | 1.47771 | 1.70661 | 6.33529 | 6.52898 | 5.2668  |
| AI506816      | 3.6521  | 3.5E-06 | 1.27104 | 1.35441 | 1.55253 | 5.496   | 4.83876 | 3.24726 |
| Kn1           | 3.64626 | 5.2E-05 | 0.2246  | 0.13152 | 0.20202 | 1.02959 | 0.90515 | 0.55234 |
| Scimp         | 3.6406  | 0.04345 | 0.1615  | 0.20805 | 0.30435 | 1.17381 | 0.78671 | 1.09215 |
| Sv2c          | 3.63137 | 0.0032  | 0.05624 | 0.0483  | 0.0265  | 0.24699 | 0.17353 | 0.16483 |
| Dlgap5        | 3.62989 | 0.00085 | 0.13114 | 0.06758 | 0.13593 | 0.61956 | 0.47274 | 0.37248 |
| Mest          | 3.62542 | 1.9E-05 | 0.19895 | 0.26579 | 0.49991 | 1.7875  | 1.98144 | 0.53818 |
| Slc7a5        | 3.61787 | 0.00422 | 0.30574 | 0.54536 | 0.77564 | 2.22226 | 2.10808 | 1.30421 |
| Cd28          | 3.61777 | 0.00095 | 0.1282  | 0.11011 | 0.10738 | 0.76359 | 0.54127 | 0.2312  |
| P2ry10        | 3.60779 | 0.00367 | 0.2632  | 0.32651 | 0.22045 | 1.22223 | 1.68106 | 0.79109 |
| S100a4        | 3.59518 | 2.3E-05 | 1.64261 | 2.82145 | 4.22123 | 16.959  | 12.9484 | 8.68481 |
| Igf1          | 3.58302 | 1.4E-07 | 0.70442 | 1.00578 | 1.24455 | 6.02402 | 4.87279 | 2.17944 |
| Tnfrsf1b      | 3.57515 | 1.8E-10 | 1.62172 | 2.23631 | 2.60423 | 10.8535 | 11.0379 | 6.27141 |
| Tfec          | 3.57185 | 0.01133 | 0.07795 | 0.02678 | 0.17627 | 0.43908 | 0.57717 | 0.18977 |
| Tnfrsf13b     | 3.5672  | 7.6E-05 | 0.369   | 0.36973 | 0.37668 | 1.64834 | 1.82752 | 1.3725  |
| Itgax         | 3.56415 | 3.7E-07 | 1.72491 | 1.82447 | 2.17281 | 9.61741 | 9.14571 | 6.16405 |
| Glipr2        | 3.5577  | 2E-08   | 0.63902 | 0.93621 | 1.4522  | 5.32769 | 3.95526 | 3.60973 |
| Chsy3         | 3.55646 | 1.4E-07 | 0.32729 | 0.40885 | 0.42054 | 1.51382 | 1.62335 | 1.89142 |
| Capn6         | 3.55363 | 0.00017 | 0.04475 | 0.08647 | 0.08433 | 0.36592 | 0.3488  | 0.22698 |
| Cxcl16        | 3.55174 | 9.7E-10 | 2.56917 | 3.07421 | 3.9441  | 12.3792 | 14.0624 | 10.1905 |
| Cd68          | 3.54765 | 0.00307 | 0.90191 | 1.43001 | 1.1767  | 6.68148 | 6.35378 | 2.53357 |
| Gadd45g       | 3.54588 | 0.00022 | 2.00734 | 2.49017 | 4.27329 | 10.7399 | 8.54719 | 15.9884 |
| Lox           | 3.54488 | 6.6E-05 | 1.77679 | 1.85295 | 2.63091 | 10.7565 | 10.2276 | 6.03247 |
| Ly6c1         | 3.5336  | 8.8E-06 | 2.23609 | 3.43891 | 5.78202 | 20.0325 | 17.074  | 11.0426 |
| B2m           | 3.53028 | 0.00645 | 10.2418 | 15.0664 | 27.0407 | 105.213 | 97.5121 | 27.0192 |
| Tifab         | 3.52163 | 1.7E-06 | 0.47368 | 0.70657 | 0.49332 | 2.71809 | 2.67185 | 1.85459 |
| Mtfr2         | 3.51321 | 0.04498 | 0.163   | 0.105   | 0.0768  | 0.62942 | 0.83377 | 0.38582 |
| Mgp           | 3.51164 | 0.00211 | 19.9835 | 24.1032 | 44.3057 | 173.75  | 144.448 | 60.5162 |
| Cenpa         | 3.50967 | 1.2E-05 | 0.45239 | 0.2391  | 0.29512 | 1.2963  | 1.76304 | 1.12963 |
| Slfn1         | 3.50277 | 0.00055 | 0.42107 | 0.28126 | 0.52901 | 2.63541 | 1.68654 | 0.8859  |
| Sh2b2         | 3.4978  | 8.8E-05 | 0.2102  | 0.58672 | 0.47041 | 1.90979 | 1.25438 | 2.1323  |
| Grrp1         | 3.49438 | 1.9E-06 | 2.18874 | 2.23222 | 2.06239 | 7.58144 | 7.73014 | 11.4714 |
| Col12a1       | 3.48764 | 2.4E-05 | 0.61277 | 0.65414 | 0.82562 | 3.31956 | 3.30865 | 2.22302 |
| Mdga1         | 3.48164 | 0.00043 | 0.05569 | 0.03986 | 0.13994 | 0.26144 | 0.32557 | 0.3892  |
| Tlr1          | 3.47974 | 0.00329 | 0.41701 | 0.20146 | 0.22103 | 1.08927 | 1.4474  | 1.1633  |
| Mt2           | 3.46782 | 0.00074 | 1.92806 | 3.69388 | 4.75151 | 17.3826 | 13.1493 | 10.4311 |
| Tnfaip8l1     | 3.45148 | 0.00022 | 0.14663 | 0.22038 | 0.37995 | 1.19898 | 1.14287 | 0.79329 |
| Ptpn7         | 3.44837 | 8.2E-06 | 0.25725 | 0.25776 | 0.37706 | 1.37637 | 1.04431 | 1.19846 |
| Tlr2          | 3.4454  | 9.8E-06 | 0.72335 | 0.64609 | 1.03603 | 4.20609 | 4.20032 | 1.76106 |
| Ncapg2        | 3.4446  | 2.3E-08 | 0.26411 | 0.32889 | 0.39817 | 1.67967 | 1.64681 | 0.83945 |
| Ncf4          | 3.43978 | 0.01061 | 0.94932 | 0.88942 | 0.65055 | 2.86193 | 3.23716 | 4.14378 |
| Nos2          | 3.43268 | 0.00034 | 0.27672 | 0.18673 | 0.33525 | 0.93383 | 1.25175 | 1.09611 |

|               |         |         |         |         |         |         |         |         |
|---------------|---------|---------|---------|---------|---------|---------|---------|---------|
| Slamf9        | 3.42877 | 1.7E-06 | 0.7306  | 0.62747 | 0.87618 | 3.01722 | 3.23553 | 3.05435 |
| Cd84          | 3.42191 | 8.2E-08 | 0.83426 | 0.91949 | 1.00882 | 4.62357 | 4.47041 | 2.59524 |
| Ulbp1         | 3.41787 | 0.03529 | 0.23971 | 0.20587 | 0.09035 | 1.08895 | 0.65394 | 0.51875 |
| Kntc1         | 3.4166  | 8.9E-06 | 0.15294 | 0.16888 | 0.14411 | 0.82379 | 0.61731 | 0.50236 |
| Zbp1          | 3.41352 | 0.03049 | 0.69193 | 0.59425 | 0.53556 | 2.85137 | 2.81692 | 2.00542 |
| Ms4a7         | 3.41341 | 0.00049 | 0.33293 | 0.25229 | 0.25835 | 0.94303 | 1.41195 | 1.13899 |
| Fabp5         | 3.41305 | 0.00075 | 0.7579  | 0.44094 | 1.38222 | 3.99827 | 5.28798 | 1.65338 |
| Adam11        | 3.41291 | 7.9E-05 | 0.23075 | 0.2246  | 0.20293 | 0.72677 | 0.89926 | 1.08194 |
| Ifi207        | 3.40855 | 6.3E-08 | 0.72652 | 0.73154 | 0.96785 | 2.73136 | 3.78327 | 3.35456 |
| Serpine1      | 3.405   | 6.4E-05 | 1.39496 | 2.18352 | 2.12005 | 6.48004 | 9.14096 | 7.48611 |
| Aim2          | 3.40469 | 1.6E-05 | 0.42346 | 0.25672 | 0.30513 | 1.42577 | 1.62601 | 1.04442 |
| Ear2          | 3.4004  | 0.03061 | 0.48516 | 0.83334 | 1.71432 | 6.06088 | 4.37232 | 2.2967  |
| Ccnf          | 3.3914  | 0.00029 | 0.25327 | 0.24168 | 0.29168 | 1.30392 | 1.17893 | 0.76123 |
| Susd3         | 3.38745 | 0.00766 | 0.21518 | 0.132   | 0.14482 | 0.6982  | 0.62893 | 0.7068  |
| Ccng1         | 3.38275 | 3.9E-09 | 4.54413 | 4.90497 | 5.91965 | 24.3427 | 26.733  | 12.9975 |
| Sh2d1b1       | 3.37377 | 0.01672 | 0.13712 | 0.17664 | 0.32301 | 1.1835  | 1.03534 | 0.37092 |
| Pld4          | 3.36109 | 6E-08   | 1.10222 | 1.59032 | 1.95255 | 6.76959 | 7.86076 | 4.35313 |
| Gda           | 3.35453 | 6.1E-09 | 0.59702 | 0.95223 | 1.27245 | 4.40395 | 4.00242 | 2.94159 |
| C330027C09Rik | 3.35173 | 0.00036 | 0.18398 | 0.079   | 0.17336 | 0.86364 | 0.64232 | 0.24884 |
| Aoah          | 3.34966 | 0.00156 | 0.1795  | 0.25694 | 0.31009 | 1.00569 | 1.19505 | 0.84974 |
| Sifn8         | 3.34528 | 1.5E-05 | 0.40502 | 0.476   | 0.64276 | 2.88575 | 2.22225 | 1.06679 |
| Birc5         | 3.33597 | 0.00253 | 0.15381 | 0.13209 | 0.38647 | 1.25766 | 0.87412 | 0.55474 |
| Ptges         | 3.32639 | 3.8E-06 | 0.5768  | 0.83832 | 1.17062 | 3.78928 | 4.02022 | 2.19041 |
| Ms4a4b        | 3.32243 | 0.01219 | 0.2811  | 0.09941 | 0.29604 | 1.51734 | 0.83773 | 0.4473  |
| Serpib9       | 3.31558 | 2.4E-05 | 1.39772 | 1.60769 | 2.21073 | 9.84168 | 8.72994 | 2.97074 |
| Kctd12b       | 3.30794 | 0.00269 | 0.10665 | 0.1374  | 0.28474 | 0.85595 | 0.98716 | 0.28851 |
| Gyg           | 3.3069  | 0.00231 | 1.22775 | 1.53372 | 2.80455 | 9.70122 | 10.2581 | 2.76764 |
| Lax1          | 3.29731 | 0.00022 | 0.45322 | 0.42168 | 0.605   | 1.71573 | 2.39182 | 1.78792 |
| Hexb          | 3.29587 | 0.00044 | 1.46567 | 2.36019 | 3.23687 | 10.2786 | 11.6024 | 5.82325 |
| Col5a2        | 3.29373 | 7E-09   | 5.05551 | 5.09932 | 5.53476 | 19.2071 | 18.9756 | 22.7147 |
| Malt1         | 3.29002 | 6.3E-09 | 1.10019 | 0.88583 | 1.44164 | 5.66949 | 5.14178 | 2.92961 |
| Samsn1        | 3.28896 | 0.00274 | 0.26928 | 0.11563 | 0.16311 | 0.83881 | 0.86202 | 0.49428 |
| Slc15a3       | 3.28834 | 2.8E-08 | 0.60351 | 0.4774  | 0.61357 | 2.55402 | 2.19723 | 2.10513 |
| Cmah          | 3.28746 | 1.3E-09 | 0.76084 | 0.67596 | 0.80756 | 3.39272 | 2.81171 | 2.60223 |
| Slc27a6       | 3.26422 | 0.00346 | 0.45622 | 0.21098 | 0.56215 | 1.97682 | 2.15404 | 0.75945 |
| Espl1         | 3.26083 | 3.5E-09 | 0.27622 | 0.24853 | 0.30985 | 1.29066 | 1.21745 | 0.78279 |
| Atp1a3        | 3.25933 | 8.3E-05 | 0.13173 | 0.23884 | 0.48272 | 1.01068 | 1.08381 | 1.16804 |
| Fcrls         | 3.24752 | 9E-07   | 0.82201 | 0.93059 | 1.021   | 3.80206 | 4.14996 | 2.98165 |
| Gla           | 3.23719 | 2.3E-06 | 0.29381 | 0.43585 | 0.52853 | 1.86857 | 2.00377 | 1.08378 |
| Ercc6l        | 3.23343 | 0.01499 | 0.08224 | 0.0565  | 0.07749 | 0.29888 | 0.41665 | 0.17797 |
| Iqgap3        | 3.21765 | 0.00628 | 0.2528  | 0.16448 | 0.2743  | 1.09272 | 1.00758 | 0.62167 |
| Ptgir         | 3.20985 | 3.8E-05 | 0.3662  | 0.33697 | 0.39435 | 2.04378 | 1.35067 | 0.88446 |
| Nlrp1b        | 3.20136 | 3.7E-05 | 0.37345 | 0.48704 | 0.32583 | 1.75932 | 1.40148 | 1.4592  |
| Ifi205        | 3.20052 | 0.00301 | 0.08351 | 0.41241 | 0.33444 | 1.63131 | 0.91535 | 0.87539 |
| Siglec1       | 3.19942 | 2.6E-06 | 0.39068 | 0.62912 | 0.5637  | 2.4514  | 2.52171 | 1.2715  |
| Nckap1l       | 3.19572 | 1.1E-09 | 2.16309 | 2.01651 | 2.33437 | 9.13766 | 9.02426 | 7.05161 |
| Mmp25         | 3.19386 | 0.002   | 0.20684 | 0.15543 | 0.12181 | 0.61074 | 0.75569 | 0.52454 |
| Plk1          | 3.1897  | 0.002   | 0.2776  | 0.30653 | 0.29895 | 1.44124 | 1.04323 | 1.01914 |
| Hrh2          | 3.17759 | 0.02698 | 0.08816 | 0.11358 | 0.06923 | 0.5607  | 0.40085 | 0.13912 |
| Clec4a2       | 3.17729 | 0.0208  | 0.17883 | 0.10239 | 0.14042 | 0.7582  | 0.58076 | 0.3628  |
| Melk          | 3.17647 | 0.00657 | 0.08803 | 0.126   | 0.19354 | 0.58651 | 0.60036 | 0.39688 |
| Il21r         | 3.17487 | 0.00099 | 0.52471 | 0.49571 | 0.59331 | 1.59704 | 1.89152 | 2.55491 |
| Zc3h12d       | 3.17089 | 0.00691 | 0.19176 | 0.31108 | 0.18069 | 0.7356  | 1.16248 | 0.77808 |
| Cotl1         | 3.16904 | 1.5E-06 | 5.027   | 5.72519 | 7.5171  | 24.8718 | 25.9792 | 18.7718 |
| Cd3d          | 3.16814 | 0.0108  | 0.14414 | 0.16506 | 0.58857 | 1.57155 | 1.31075 | 0.5199  |
| Tmem151a      | 3.16753 | 0.02918 | 0.16328 | 0.06232 | 0.10257 | 0.28021 | 0.56561 | 0.41714 |



|               |         |         |         |         |         |         |         |         |
|---------------|---------|---------|---------|---------|---------|---------|---------|---------|
| Hvcn1         | 3.16252 | 0.00029 | 2.00702 | 1.19818 | 1.8681  | 4.55869 | 4.53083 | 3.77393 |
| Cenpe         | 3.16187 | 0.00904 | 0.37776 | 0.35224 | 0.41697 | 1.86314 | 1.5668  | 1.02186 |
| Cdk1          | 3.16119 | 0.00586 | 0.02531 | 0.17393 | 0.47706 | 1.10396 | 1.01119 | 0.4451  |
| Nxpe5         | 3.15725 | 0.01766 | 0.03899 | 0.11721 | 0.07348 | 0.30113 | 0.22794 | 0.39555 |
| Themis        | 3.15537 | 0.02522 | 0.0676  | 0.05805 | 0.09099 | 0.51763 | 0.31047 | 0.19591 |
| Fbn2          | 3.14695 | 0.02182 | 0.04161 | 0.03573 | 0.06273 | 0.17389 | 0.22701 | 0.13506 |
| Nsl1          | 3.13657 | 0.00274 | 0.09867 | 0.21185 | 0.12396 | 0.41835 | 0.73701 | 0.53382 |
| Selp          | 3.13636 | 0.00111 | 0.07905 | 0.18669 | 0.20483 | 0.66431 | 0.80864 | 0.34747 |
| Thy1          | 3.13146 | 3.8E-07 | 1.13573 | 0.90573 | 1.64346 | 5.7858  | 4.82126 | 3.29168 |
| Hbegf         | 3.11411 | 2.1E-11 | 1.6905  | 1.70435 | 2.87416 | 8.01338 | 10.0254 | 5.51734 |
| Tmem59l       | 3.11262 | 0.02535 | 0.2622  | 0.13511 | 0.29648 | 0.80995 | 0.97074 | 0.85113 |
| Clec4a3       | 3.11032 | 0.03304 | 0.39431 | 0.05644 | 0.49539 | 1.43299 | 1.08847 | 0.97775 |
| Sh2d2a        | 3.10627 | 0.00154 | 0.11747 | 0.16394 | 0.26289 | 0.73376 | 0.70101 | 0.59582 |
| Pik3cg        | 3.10068 | 1.3E-06 | 0.44979 | 0.48563 | 0.71444 | 2.40522 | 2.3664  | 1.4253  |
| Naip5         | 3.09967 | 1.1E-06 | 0.50273 | 0.24467 | 0.55266 | 1.87271 | 1.66534 | 1.22394 |
| Il2ra         | 3.09818 | 0.00626 | 0.05023 | 0.17254 | 0.1262  | 0.4259  | 0.55458 | 0.3623  |
| Fbn1          | 3.09672 | 3E-09   | 4.99028 | 5.47768 | 6.97876 | 25.7988 | 24.1206 | 15.4053 |
| 9330175E14Rik | 3.09116 | 0.01098 | 0.13218 | 0.06307 | 0.08303 | 0.41364 | 0.34341 | 0.29796 |
| Klrk1         | 3.09113 | 0.01019 | 0.14137 | 0.20814 | 0.36158 | 1.50464 | 0.88546 | 0.30048 |
| Naip2         | 3.08858 | 5.3E-08 | 0.4139  | 0.44821 | 0.61045 | 2.50156 | 1.9111  | 1.14398 |
| Ppfia4        | 3.08723 | 2.5E-07 | 0.31847 | 0.20513 | 0.38761 | 1.10916 | 1.12476 | 1.1307  |
| Cd300a        | 3.08698 | 8.9E-06 | 0.36812 | 0.31615 | 0.45093 | 1.689   | 1.56014 | 0.99579 |
| Cr2           | 3.08281 | 0.02147 | 0.15051 | 0.12003 | 0.2026  | 0.60557 | 0.56559 | 0.56708 |
| Sash3         | 3.08031 | 1.1E-05 | 1.00988 | 0.58753 | 1.07436 | 3.90686 | 3.77692 | 2.29118 |
| F10           | 3.07503 | 8.7E-05 | 0.31932 | 0.52107 | 0.5416  | 2.00184 | 1.6489  | 1.2957  |
| Lgmn          | 3.0748  | 4.2E-11 | 6.15671 | 5.93241 | 8.02984 | 27.5591 | 28.8581 | 18.6347 |
| Tlr7          | 3.07114 | 0.00681 | 0.19228 | 0.16513 | 0.40261 | 1.02874 | 1.37376 | 0.43343 |
| Fjx1          | 3.07111 | 0.00039 | 0.50087 | 0.52576 | 0.5244  | 1.9214  | 1.95197 | 1.88181 |
| Adgre1        | 3.06977 | 0.00034 | 0.94061 | 0.8309  | 1.3168  | 3.66251 | 5.8127  | 2.18093 |
| Cxcr3         | 3.06819 | 0.02658 | 0.2519  | 0.30288 | 0.3323  | 1.09854 | 1.42344 | 0.81769 |
| Slc39a14      | 3.0615  | 3E-11   | 0.63649 | 0.65313 | 0.89573 | 2.71868 | 2.77042 | 2.4932  |
| Lrp2          | 3.05938 | 2.7E-06 | 0.91902 | 0.91934 | 1.20546 | 4.62556 | 4.45149 | 2.36596 |
| Apobec1       | 3.05215 | 5.1E-05 | 1.25873 | 0.88701 | 1.64225 | 4.89704 | 5.18846 | 3.79786 |
| Btk           | 3.0502  | 7.7E-05 | 0.60926 | 0.4519  | 0.60019 | 1.98773 | 2.21249 | 1.9103  |
| Cd180         | 3.03904 | 0.00352 | 0.4255  | 0.29899 | 0.45561 | 1.59905 | 1.77128 | 0.62782 |
| Ccnb2         | 3.0352  | 0.0236  | 0.34177 | 0.34244 | 0.37571 | 1.70782 | 1.83138 | 0.38521 |
| Cstb          | 3.02797 | 1.6E-05 | 4.51325 | 3.12591 | 4.11552 | 16.7988 | 17.7306 | 9.05807 |
| Cd276         | 3.02655 | 2.2E-06 | 0.54833 | 0.42997 | 0.5616  | 2.14434 | 1.85817 | 1.64449 |
| Praf2         | 3.02562 | 0.018   | 0.65129 | 0.39154 | 1.16601 | 2.66277 | 2.03053 | 1.32134 |
| Itgb2         | 3.01542 | 6.6E-06 | 3.37172 | 3.60741 | 4.71177 | 17.9649 | 15.6734 | 9.23673 |
| Msln          | 3.01134 | 0.00296 | 1.7326  | 0.70858 | 0.73855 | 2.32375 | 4.17992 | 4.96581 |
| Tnfrsf13c     | 3.01121 | 0.03505 | 0.21618 | 0.25993 | 0.57036 | 1.13919 | 0.92674 | 1.63741 |
| C1qtnf6       | 2.97284 | 3.3E-08 | 1.37964 | 1.55905 | 1.50525 | 5.77254 | 7.07451 | 3.38829 |
| Tgm1          | 2.97157 | 0.00012 | 0.29011 | 0.3239  | 0.62874 | 1.50241 | 1.55458 | 1.37336 |
| Nusap1        | 2.96414 | 0.00446 | 0.10742 | 0.22142 | 0.30367 | 0.93697 | 0.9001  | 0.46495 |
| Trim59        | 2.96351 | 0.01356 | 0.3122  | 0.11172 | 0.31869 | 1.25278 | 1.16599 | 0.28151 |
| Ifit1         | 2.96215 | 0.00012 | 1.05069 | 1.07156 | 1.73257 | 6.41376 | 4.67051 | 2.70898 |
| Loxl2         | 2.95533 | 7.5E-06 | 1.6296  | 2.20325 | 2.06763 | 7.9159  | 7.35681 | 6.19766 |
| Gpr65         | 2.94549 | 0.00888 | 0.29793 | 0.14621 | 0.52135 | 1.35341 | 1.1196  | 0.92105 |
| Bub1          | 2.94367 | 0.03599 | 0.10015 | 0.06881 | 0.18873 | 0.65511 | 0.39028 | 0.21672 |
| Spc25         | 2.93883 | 0.00039 | 0.27355 | 0.25843 | 0.25776 | 1.01898 | 1.19932 | 0.59198 |
| Hist1h4f      | 2.93851 | 0.00042 | 4.01467 | 3.83103 | 6.30485 | 19.0482 | 21.7302 | 12.9717 |
| Rrm2          | 2.93745 | 0.00243 | 0.50354 | 0.62166 | 0.74137 | 2.94512 | 2.45297 | 1.31956 |
| Cenpf         | 2.92694 | 0.00039 | 0.36894 | 0.32346 | 0.56491 | 1.94135 | 1.52766 | 0.98761 |
| Lpcat2        | 2.92573 | 4.6E-05 | 0.54054 | 0.46424 | 0.65486 | 2.12814 | 1.85579 | 1.9148  |
| Il2rg         | 2.92148 | 0.00209 | 1.20564 | 1.09819 | 1.68684 | 5.84201 | 5.44601 | 2.17423 |

|          |         |         |         |         |         |         |         |         |
|----------|---------|---------|---------|---------|---------|---------|---------|---------|
| Bhlhe40  | 2.91551 | 7.3E-08 | 2.07891 | 2.92994 | 3.742   | 11.5991 | 10.8803 | 8.11099 |
| Pou2af1  | 2.91347 | 0.00133 | 0.47897 | 0.35259 | 0.70922 | 1.77177 | 2.39995 | 1.24939 |
| Top2a    | 2.91335 | 0.00026 | 0.89985 | 0.79775 | 1.07583 | 4.28116 | 3.45026 | 2.17242 |
| Slc29a3  | 2.90749 | 0.00016 | 0.59793 | 0.65474 | 0.94371 | 3.35454 | 3.02926 | 1.47591 |
| Tmem173  | 2.90358 | 2.8E-05 | 1.02285 | 1.39903 | 1.35647 | 5.74795 | 4.8351  | 2.86938 |
| Ctsz     | 2.90319 | 7.6E-08 | 6.53603 | 8.00423 | 10.1505 | 34.0902 | 32.4883 | 20.3817 |
| Mmp19    | 2.89953 | 0.0001  | 1.02296 | 0.85659 | 1.39767 | 3.99647 | 4.18595 | 2.66343 |
| Mthfd2   | 2.89207 | 0.00449 | 0.15006 | 0.27922 | 0.18852 | 0.90889 | 0.85282 | 0.43974 |
| Runx3    | 2.88911 | 3.3E-05 | 0.43578 | 0.38923 | 0.55844 | 2.04297 | 1.61337 | 1.17881 |
| Irf7     | 2.8859  | 0.0022  | 1.29945 | 1.71122 | 1.36048 | 5.69318 | 5.79562 | 3.9838  |
| S100a6   | 2.88204 | 8E-05   | 5.0398  | 5.42412 | 8.89659 | 28.3428 | 22.9971 | 15.7902 |
| Ccl22    | 2.88016 | 0.00034 | 0.63765 | 0.90198 | 0.77755 | 3.20337 | 2.81389 | 2.13074 |
| Dusp5    | 2.87272 | 0.00117 | 0.67001 | 0.90857 | 1.32913 | 2.69127 | 3.74492 | 3.4341  |
| Mms22l   | 2.87184 | 0.00055 | 0.16398 | 0.25818 | 0.23176 | 0.94354 | 0.87867 | 0.48053 |
| Basp1    | 2.86293 | 0.0012  | 1.74699 | 1.94642 | 1.95756 | 5.9199  | 5.9802  | 7.28019 |
| Tlr9     | 2.85799 | 0.00404 | 0.30089 | 0.53836 | 0.51978 | 1.75414 | 1.83219 | 1.15307 |
| Itm2a    | 2.85746 | 0.0061  | 0.45004 | 0.81596 | 0.801   | 2.77131 | 3.84875 | 0.74396 |
| Sh3pxd2b | 2.85596 | 5.5E-12 | 1.3563  | 1.49655 | 1.54038 | 5.22285 | 5.59198 | 4.36139 |
| Cd8a     | 2.85388 | 0.00732 | 0.28773 | 0.51482 | 0.45187 | 2.35279 | 1.35495 | 0.77835 |
| Nxpe4    | 2.85259 | 0.00014 | 0.32458 | 0.39279 | 0.37535 | 1.38063 | 1.62427 | 0.75828 |
| Rasgrp1  | 2.84849 | 0.00015 | 0.45161 | 0.60185 | 0.60163 | 2.40527 | 1.92688 | 1.41121 |
| Gpr35    | 2.84723 | 0.0002  | 0.28835 | 0.47981 | 0.2717  | 1.40814 | 1.51002 | 0.75563 |
| Psat1    | 2.84501 | 0.00483 | 0.164   | 0.36973 | 0.40565 | 1.63903 | 1.07854 | 0.55455 |
| Mcm10    | 2.84413 | 0.01482 | 0.11337 | 0.10711 | 0.08546 | 0.32962 | 0.46393 | 0.27602 |
| Cd1d1    | 2.84193 | 0.00343 | 0.23753 | 0.23314 | 0.51158 | 1.17153 | 1.55383 | 0.59664 |
| Ifi44    | 2.83412 | 0.00546 | 0.15652 | 0.15886 | 0.24133 | 0.84028 | 0.77632 | 0.30792 |
| Lipa     | 2.83021 | 0.0039  | 1.82111 | 2.24513 | 3.3766  | 10.4077 | 12.2482 | 3.49605 |
| Zranb3   | 2.82836 | 0.01343 | 0.20171 | 0.07424 | 0.19912 | 0.81161 | 0.70188 | 0.1559  |
| Plek     | 2.82462 | 1.4E-08 | 1.2636  | 1.61948 | 2.17981 | 7.11784 | 6.55325 | 3.73365 |
| Pole     | 2.82407 | 0.00074 | 0.2819  | 0.24211 | 0.17994 | 0.8262  | 0.84168 | 0.73797 |
| Enc1     | 2.80865 | 1.1E-06 | 0.79079 | 1.31093 | 1.29966 | 3.95994 | 4.89148 | 2.78587 |
| Col1a1   | 2.80582 | 0.00155 | 95.9775 | 94.0574 | 79.3561 | 219.045 | 275.349 | 388.686 |
| Serpib6b | 2.7953  | 0.00522 | 1.50631 | 2.48521 | 3.88455 | 12.8212 | 11.1613 | 3.21687 |
| Btla     | 2.79071 | 6.5E-05 | 0.77649 | 0.66687 | 0.78212 | 2.84623 | 2.99999 | 1.73831 |
| Kif4     | 2.78936 | 6.6E-05 | 0.22142 | 0.21733 | 0.31296 | 1.02022 | 0.84749 | 0.72731 |
| Mex3a    | 2.78875 | 0.0013  | 0.09056 | 0.19444 | 0.128   | 0.49366 | 0.54408 | 0.38787 |
| Tbxas1   | 2.7856  | 3.6E-06 | 0.20138 | 0.25531 | 0.48794 | 1.33303 | 1.07444 | 0.86901 |
| Litaf    | 2.78169 | 1E-05   | 1.71643 | 2.35292 | 3.63901 | 10.6163 | 10.8698 | 4.64307 |
| Fhl3     | 2.78123 | 0.00125 | 0.41453 | 0.53402 | 0.87886 | 1.55357 | 2.06985 | 2.31278 |
| Pde1b    | 2.77918 | 7.4E-05 | 0.70852 | 0.58315 | 0.72326 | 2.27987 | 2.67493 | 1.83676 |
| Gm9930   | 2.77579 | 0.04704 | 0.22141 | 0.04754 | 0.20863 | 0.65377 | 0.51232 | 0.41176 |
| Sema6b   | 2.7746  | 2.4E-05 | 1.18411 | 1.29944 | 0.99178 | 3.44661 | 3.5678  | 4.50809 |
| Hsd11b2  | 2.77085 | 0.02839 | 0.23698 | 0.12211 | 0.35727 | 0.81816 | 0.87736 | 0.70515 |
| Bmper    | 2.7664  | 0.00016 | 0.50524 | 0.43391 | 0.57809 | 1.86892 | 1.98656 | 1.24468 |
| Ccdc80   | 2.76499 | 0.00112 | 1.32707 | 1.66437 | 2.46123 | 6.41131 | 6.40315 | 5.09985 |
| Brinp1   | 2.76128 | 0.00075 | 0.21163 | 0.13329 | 0.39883 | 1.05113 | 0.86601 | 0.53432 |
| Hsd17b7  | 2.76127 | 1.1E-05 | 0.20503 | 0.29348 | 0.43469 | 1.16427 | 1.34839 | 0.60085 |
| Acsbg1   | 2.75927 | 0.03988 | 0.07259 | 0.10391 | 0.1596  | 0.2858  | 0.4715  | 0.39274 |
| Ect2     | 2.75733 | 0.00022 | 0.27526 | 0.2503  | 0.42719 | 1.19157 | 1.13581 | 0.83219 |
| Phlda3   | 2.75683 | 1.5E-10 | 3.97161 | 5.38065 | 5.58715 | 16.8731 | 17.8759 | 14.8291 |
| Ackr3    | 2.75081 | 0.00197 | 0.57305 | 0.58163 | 0.98176 | 2.29556 | 2.46165 | 2.21952 |
| Tyrbp    | 2.74561 | 2.3E-06 | 7.06029 | 5.83902 | 8.50068 | 22.9263 | 26.3684 | 21.2207 |
| Hpse     | 2.74496 | 0.00026 | 0.24803 | 0.36213 | 0.51417 | 1.39716 | 1.57074 | 0.77158 |
| Kif22    | 2.73852 | 0.00035 | 0.33795 | 0.54992 | 0.30168 | 1.14736 | 0.97043 | 0.81794 |
| Itga4    | 2.73618 | 3.3E-05 | 0.87345 | 0.85195 | 1.15224 | 4.08122 | 4.08473 | 1.88176 |
| Myc      | 2.73323 | 0.00057 | 0.96291 | 0.85454 | 1.3005  | 2.21629 | 2.65809 | 4.94903 |

|           |         |         |         |         |         |         |         |         |
|-----------|---------|---------|---------|---------|---------|---------|---------|---------|
| Tnfaip8l2 | 2.73067 | 0.02966 | 0.6218  | 0.46727 | 1.02533 | 2.75406 | 1.59025 | 2.52303 |
| Scarb1    | 2.72636 | 1.9E-05 | 1.26468 | 1.37261 | 2.02978 | 6.89416 | 5.49733 | 3.12032 |
| Racgap1   | 2.72049 | 0.0001  | 0.3819  | 0.24334 | 0.38306 | 1.37669 | 1.17623 | 0.78312 |
| Diaph3    | 2.7172  | 4.5E-05 | 0.43756 | 0.44115 | 0.51986 | 1.74574 | 1.57548 | 1.2351  |
| P2ry6     | 2.71137 | 0.00332 | 0.7618  | 0.74772 | 0.99127 | 3.88911 | 2.72142 | 1.6682  |
| Ikzf1     | 2.71129 | 2.2E-05 | 0.75478 | 1.27053 | 1.3513  | 3.94996 | 4.10338 | 2.98095 |
| Cd48      | 2.70853 | 0.00337 | 0.73345 | 0.62991 | 2.00423 | 4.66464 | 3.35858 | 2.77767 |
| Irf5      | 2.70674 | 3.9E-05 | 1.20079 | 1.44379 | 2.06494 | 5.31852 | 5.44009 | 4.42573 |
| Ctsb      | 2.70669 | 6.6E-05 | 7.34244 | 10.0199 | 14.0626 | 41.2295 | 44.9656 | 18.2939 |
| Psap      | 2.70609 | 2.4E-09 | 50.1825 | 55.2991 | 79.1486 | 205.184 | 249.538 | 147.87  |
| Ms4a6b    | 2.70458 | 0.00094 | 0.66111 | 0.53438 | 0.73287 | 2.82657 | 2.4817  | 1.07827 |
| Lacc1     | 2.70201 | 1.8E-05 | 0.81368 | 0.51384 | 0.58631 | 1.89166 | 2.7047  | 1.71555 |
| Sema4d    | 2.7012  | 4.7E-06 | 1.21704 | 1.33557 | 1.46533 | 4.41067 | 5.34901 | 3.43851 |
| Cks1b     | 2.69894 | 0.01291 | 0.3098  | 0.93122 | 0.58382 | 1.89989 | 2.49009 | 1.99031 |
| Pidd1     | 2.69505 | 0.0014  | 0.30815 | 0.49622 | 0.39925 | 1.20738 | 1.48238 | 1.25037 |
| Aif1      | 2.68996 | 0.00338 | 0.85386 | 0.73332 | 0.59002 | 2.22388 | 3.10577 | 1.84781 |
| Cd83      | 2.68969 | 0.01937 | 0.85458 | 0.76889 | 0.65186 | 2.62505 | 3.25111 | 1.70626 |
| Cyth4     | 2.68702 | 8.2E-06 | 3.68703 | 3.40805 | 3.70972 | 11.6961 | 10.5635 | 12.2981 |
| Ptpcr     | 2.68106 | 4.2E-05 | 1.73002 | 1.62489 | 2.37932 | 7.65167 | 7.45218 | 3.77374 |
| Dtl       | 2.67677 | 0.00573 | 0.11398 | 0.10605 | 0.11635 | 0.40561 | 0.40719 | 0.28264 |
| Cfb       | 2.67245 | 0.00294 | 1.45089 | 2.33307 | 2.70517 | 8.27381 | 8.15062 | 3.71601 |
| Hmox1     | 2.66652 | 0.00087 | 1.39452 | 1.6254  | 2.67497 | 8.0092  | 6.84183 | 3.57022 |
| Vcan      | 2.66612 | 1E-05   | 0.37387 | 0.55932 | 0.6648  | 2.20242 | 1.87414 | 0.99503 |
| Ubash3a   | 2.66397 | 0.03471 | 0.18343 | 0.15754 | 0.17284 | 0.64281 | 0.66379 | 0.35442 |
| E2f1      | 2.65865 | 7.7E-06 | 0.41475 | 0.73614 | 0.57318 | 1.93433 | 1.88571 | 1.79508 |
| Slc40a1   | 2.65152 | 0.0043  | 0.36116 | 0.27694 | 0.35247 | 1.11331 | 1.45776 | 0.66294 |
| Ltbp2     | 2.6481  | 7.2E-09 | 6.47877 | 6.14072 | 8.26351 | 22.8964 | 24.2935 | 19.8172 |
| Lgals3bp  | 2.64662 | 3.5E-05 | 5.05418 | 6.39266 | 7.33123 | 22.3754 | 24.5315 | 13.7548 |
| Kcnab2    | 2.64472 | 0.00165 | 0.50029 | 0.52366 | 0.61873 | 1.77555 | 2.02588 | 1.41678 |
| Apoe      | 2.6432  | 0.01053 | 17.337  | 21.6235 | 33.329  | 74.1269 | 84.6254 | 66.5173 |
| Zfp618    | 2.63663 | 7.9E-05 | 0.10258 | 0.14416 | 0.24603 | 0.55069 | 0.59962 | 0.41621 |
| Brip1     | 2.63536 | 0.00065 | 0.14039 | 0.12057 | 0.16536 | 0.44644 | 0.51294 | 0.37978 |
| Lyz2      | 2.62792 | 0.0101  | 107.873 | 129.501 | 257.035 | 615.834 | 668.377 | 269.91  |
| Plac8     | 2.62594 | 0.00021 | 1.09557 | 1.36432 | 1.85819 | 6.17136 | 5.44373 | 2.22271 |
| Foxm1     | 2.62293 | 0.0022  | 0.3789  | 0.33843 | 0.48556 | 1.37699 | 1.53569 | 0.86096 |
| Gimap9    | 2.62293 | 0.00154 | 0.42488 | 0.50174 | 0.9008  | 2.26792 | 1.86281 | 1.65219 |
| Naip6     | 2.619   | 1.6E-05 | 0.43431 | 0.30718 | 0.48146 | 1.18378 | 1.45611 | 0.91569 |
| Mybl1     | 2.61464 | 0.00074 | 0.19372 | 0.15251 | 0.19775 | 0.63069 | 0.62914 | 0.45853 |
| Atf3      | 2.60995 | 0.02674 | 0.44535 | 1.70378 | 1.06818 | 2.722   | 3.82618 | 3.5046  |
| Armcx4    | 2.60879 | 4.5E-05 | 3.13014 | 2.86623 | 3.87435 | 10.3054 | 11.1253 | 9.36711 |
| Skap1     | 2.60219 | 0.00293 | 0.24542 | 0.0803  | 0.24227 | 0.74327 | 0.54654 | 0.50582 |
| Itgam_1   | 2.60184 | 0.00021 | 0.97206 | 1.01373 | 1.57019 | 3.94269 | 4.14339 | 2.48863 |
| Ccr7      | 2.60036 | 0.01805 | 0.83769 | 0.79516 | 0.9555  | 2.16307 | 4.03777 | 2.02748 |
| Dck       | 2.59848 | 0.00019 | 0.45332 | 0.48666 | 0.98779 | 2.08506 | 2.76039 | 1.18795 |
| Mcm5      | 2.59332 | 0.00022 | 0.546   | 0.75028 | 0.78201 | 2.71846 | 2.55342 | 1.32928 |
| Clec2i    | 2.58539 | 0.04104 | 0.19629 | 0.28899 | 0.26422 | 1.07002 | 0.84692 | 0.37927 |
| Inhba     | 2.58337 | 0.01195 | 0.22022 | 0.60523 | 0.37351 | 0.80033 | 1.33026 | 1.72758 |
| Lag3      | 2.57822 | 0.01264 | 0.53755 | 0.31962 | 0.3117  | 1.50275 | 1.08774 | 1.06263 |
| Fgr       | 2.57605 | 3.1E-05 | 0.903   | 0.83369 | 0.65943 | 2.85097 | 2.72732 | 1.98469 |
| Icam1     | 2.57265 | 1.8E-06 | 7.42065 | 6.37309 | 9.51777 | 33.4011 | 27.0095 | 15.3392 |
| Mafb      | 2.56843 | 9.1E-06 | 1.60775 | 2.65022 | 2.54119 | 5.4188  | 6.94777 | 8.13703 |
| Rad54l    | 2.56805 | 0.003   | 0.2037  | 0.3013  | 0.24526 | 0.59635 | 0.6836  | 0.35205 |
| Ltf       | 2.56311 | 0.03369 | 1.97165 | 2.86561 | 1.9531  | 3.23819 | 5.95986 | 10.6328 |
| Chaf1b    | 2.56255 | 0.02278 | 0.12207 | 0.22465 | 0.16431 | 0.6971  | 0.50969 | 0.40096 |
| Bard1     | 2.56153 | 0.00873 | 0.12328 | 0.19852 | 0.14521 | 0.67205 | 0.54051 | 0.25012 |
| B4galt6   | 2.55872 | 9E-06   | 0.37538 | 0.42555 | 0.46689 | 1.28234 | 1.62381 | 1.03573 |



|         |         |         |         |         |         |         |         |         |
|---------|---------|---------|---------|---------|---------|---------|---------|---------|
| Kmo     | 2.55626 | 0.00714 | 0.31383 | 0.33294 | 0.3305  | 0.97279 | 1.07915 | 0.97378 |
| Lrrc25  | 2.55098 | 0.00695 | 0.54279 | 0.41437 | 0.56828 | 1.31506 | 1.82152 | 1.63142 |
| Rac2    | 2.55    | 0.00509 | 0.94791 | 1.18414 | 1.51571 | 5.35001 | 3.80607 | 2.21451 |
| Tifa    | 2.54882 | 2.3E-05 | 0.35439 | 0.5619  | 0.66787 | 1.83282 | 1.99199 | 1.06927 |
| Lamb3   | 2.54788 | 1.5E-05 | 1.26273 | 1.22004 | 2.0376  | 5.43512 | 5.36701 | 3.13827 |
| Trim6   | 2.54686 | 0.02595 | 0.17819 | 0.10713 | 0.15112 | 0.43712 | 0.45139 | 0.43382 |
| Itgae   | 2.54508 | 0.00208 | 0.64725 | 0.44143 | 0.78926 | 1.93714 | 2.15148 | 1.64788 |
| Cd300c2 | 2.54325 | 0.00011 | 1.50476 | 1.76228 | 1.48234 | 5.7793  | 5.13121 | 3.97798 |
| Pirb    | 2.54103 | 3.2E-05 | 1.05328 | 0.88784 | 1.4152  | 3.8987  | 4.33281 | 3.08664 |
| Col5a1  | 2.54031 | 8.4E-05 | 6.97455 | 7.42792 | 6.97843 | 19.8034 | 18.7043 | 25.2298 |
| Col8a1  | 2.53859 | 0.00393 | 0.25609 | 0.29325 | 0.48261 | 1.19438 | 1.3307  | 0.64656 |
| Clu     | 2.53456 | 1.5E-06 | 4.46438 | 7.05833 | 9.46498 | 25.2354 | 22.9094 | 15.576  |
| Myo1f   | 2.53291 | 0.00034 | 1.96989 | 1.92043 | 2.34112 | 6.33665 | 7.15822 | 5.52074 |
| Stat4   | 2.53245 | 0.00424 | 0.29279 | 0.2708  | 0.382   | 0.81852 | 1.18494 | 0.97481 |
| Myo5a   | 2.53161 | 6.1E-09 | 0.94849 | 1.07769 | 1.13243 | 3.7253  | 3.82839 | 2.24701 |
| Cd274   | 2.53027 | 0.00903 | 0.8427  | 1.03391 | 1.27049 | 3.74067 | 3.073   | 2.73549 |
| Kif11   | 2.52895 | 0.00087 | 0.41622 | 0.55951 | 0.59682 | 2.20318 | 1.6397  | 1.02801 |
| Sdk2    | 2.52721 | 0.00036 | 0.10148 | 0.11136 | 0.15936 | 0.41488 | 0.42293 | 0.29738 |
| Scml4   | 2.52463 | 0.00034 | 0.2032  | 0.24238 | 0.18083 | 0.69745 | 0.67092 | 0.56495 |
| Nfkbie  | 2.5193  | 0.00317 | 1.44026 | 1.48433 | 1.59461 | 4.54719 | 5.12175 | 4.09082 |
| Lck     | 2.51891 | 0.00799 | 1.13141 | 0.76712 | 1.20637 | 3.57073 | 3.30693 | 2.5773  |
| Phex    | 2.51469 | 0.02403 | 0.19407 | 0.34526 | 0.33961 | 1.05794 | 1.4046  | 0.29999 |
| Capg    | 2.51446 | 1.7E-06 | 1.75863 | 1.98421 | 1.55963 | 5.38867 | 6.11452 | 4.80389 |
| Shisa4  | 2.51358 | 0.0003  | 0.50492 | 0.52657 | 0.57773 | 2.06436 | 1.65151 | 1.17074 |
| Ntrk2   | 2.51278 | 0.00057 | 0.20213 | 0.26582 | 0.31546 | 0.70589 | 0.99083 | 0.67494 |
| Prune2  | 2.51107 | 0.00242 | 0.20213 | 0.2574  | 0.243   | 0.76623 | 0.79451 | 0.58448 |
| Plppr3  | 2.50578 | 0.00214 | 0.86067 | 0.94545 | 1.37678 | 2.18221 | 1.95008 | 1.35359 |
| Cdc20   | 2.50364 | 0.02913 | 0.42017 | 0.68161 | 0.92379 | 3.43566 | 1.59195 | 0.94715 |
| Gm4951  | 2.50329 | 0.03564 | 0.75833 | 0.76454 | 0.86989 | 3.5647  | 2.18435 | 1.5608  |
| Rap2b   | 2.49942 | 0.00028 | 0.53919 | 0.5182  | 0.83468 | 2.55438 | 2.20136 | 1.04182 |
| Cdca2   | 2.49758 | 0.00155 | 0.27467 | 0.19658 | 0.23006 | 0.79024 | 0.77308 | 0.55725 |
| Ndc1    | 2.49691 | 0.00898 | 0.07084 | 0.25858 | 0.45058 | 0.98155 | 0.93178 | 0.43118 |
| Adam12  | 2.49594 | 0.00548 | 0.24456 | 0.21003 | 0.25604 | 0.71595 | 0.68833 | 0.7228  |
| Irf4    | 2.49528 | 0.00013 | 0.40691 | 0.55597 | 0.76683 | 1.81486 | 2.18044 | 1.2258  |
| Epha3   | 2.495   | 0.04826 | 0.09246 | 0.23823 | 0.39206 | 0.84007 | 0.99093 | 0.35433 |
| Ttyh2   | 2.48893 | 1.6E-05 | 0.60642 | 0.88137 | 1.03293 | 2.64885 | 2.88594 | 2.05051 |
| Spi1    | 2.48321 | 0.00101 | 1.19728 | 0.9171  | 1.64651 | 4.55696 | 3.94086 | 2.75732 |
| Sgk1    | 2.48301 | 1.5E-06 | 1.63637 | 2.29135 | 3.13408 | 7.04574 | 8.8552  | 5.19633 |
| Slc37a2 | 2.47947 | 0.00097 | 0.28881 | 0.36078 | 0.47006 | 1.21657 | 1.47087 | 0.67472 |
| Arhgdib | 2.47719 | 0.00793 | 1.43047 | 1.6673  | 2.5995  | 8.49415 | 6.07248 | 3.52405 |
| Plat    | 2.47691 | 0.03533 | 0.2096  | 0.66004 | 0.6715  | 2.15823 | 1.52477 | 0.94498 |
| Prcp    | 2.47417 | 0.00211 | 1.07428 | 1.29168 | 1.79958 | 4.92355 | 5.86125 | 1.90505 |
| Rab3il1 | 2.47209 | 2.6E-05 | 0.67186 | 0.84079 | 0.75969 | 2.38935 | 2.13207 | 2.25882 |
| Ctps    | 2.46156 | 4.6E-11 | 2.44581 | 2.75555 | 3.44454 | 9.31863 | 9.35229 | 6.90068 |
| Dok2    | 2.45053 | 0.00883 | 0.96163 | 0.54198 | 0.82117 | 2.75757 | 1.69813 | 2.35741 |
| St8sia4 | 2.44663 | 0.02086 | 0.37678 | 0.37236 | 0.49607 | 1.83825 | 1.6293  | 0.39094 |
| Il10ra  | 2.44242 | 1.1E-05 | 1.96953 | 1.88419 | 2.13773 | 6.41016 | 6.94682 | 4.48473 |
| Sfn     | 2.44171 | 0.00183 | 3.08173 | 4.17898 | 5.04349 | 11.1996 | 9.74489 | 13.7476 |
| Plbd1   | 2.44141 | 0.04262 | 1.49045 | 1.19471 | 1.96617 | 6.0184  | 6.09889 | 2.01589 |
| Selplg  | 2.43986 | 0.00697 | 1.67546 | 1.90659 | 2.48651 | 7.57312 | 6.48867 | 3.96572 |
| Tmem86a | 2.4373  | 5.8E-05 | 0.97051 | 1.23042 | 1.13222 | 3.52703 | 4.32254 | 2.06275 |
| Map2    | 2.43581 | 6.8E-05 | 0.20146 | 0.1457  | 0.20482 | 0.72734 | 0.60951 | 0.30117 |
| Col3a1  | 2.43441 | 1.9E-05 | 41.2495 | 40.7674 | 40.2578 | 112.811 | 131.464 | 114.143 |
| Cyp4f18 | 2.42942 | 0.00209 | 1.22232 | 0.88826 | 0.97456 | 2.26378 | 3.20622 | 2.92495 |
| Tacc3   | 2.42634 | 0.00444 | 0.7611  | 0.82235 | 0.94851 | 2.56523 | 2.29635 | 2.42412 |
| Epsti1  | 2.42587 | 0.00215 | 1.24206 | 1.09905 | 1.13489 | 3.93255 | 3.41033 | 2.90171 |

|           |         |         |         |         |         |         |         |         |
|-----------|---------|---------|---------|---------|---------|---------|---------|---------|
| Pgf       | 2.42586 | 0.00686 | 0.33075 | 0.61546 | 0.62331 | 1.75293 | 1.23527 | 1.71485 |
| Spry4     | 2.42305 | 6.3E-05 | 1.90119 | 2.18796 | 2.38261 | 6.01108 | 7.22396 | 5.63145 |
| Rubcnl    | 2.42258 | 0.00329 | 0.49344 | 0.31077 | 0.43396 | 1.25528 | 1.21791 | 1.15683 |
| Cers6     | 2.41688 | 2.3E-05 | 1.0194  | 1.36501 | 1.71452 | 4.73043 | 4.63484 | 2.66859 |
| Hcn1      | 2.41641 | 0.00333 | 0.06738 | 0.07027 | 0.06802 | 0.23175 | 0.24852 | 0.12368 |
| Rhoh      | 2.41332 | 0.01183 | 0.1752  | 0.22571 | 0.33018 | 0.8357  | 0.58322 | 0.69116 |
| Lrp8      | 2.41299 | 0.00957 | 0.14101 | 0.09261 | 0.1016  | 0.30897 | 0.34749 | 0.32534 |
| Tcf19     | 2.41274 | 0.00233 | 0.68513 | 0.7145  | 0.96837 | 2.97899 | 2.19326 | 1.72096 |
| March1    | 2.41251 | 0.00039 | 0.61018 | 0.41924 | 0.66695 | 1.3416  | 1.43867 | 1.17193 |
| Scube1    | 2.40935 | 1.9E-06 | 0.78368 | 0.56536 | 0.76797 | 2.28792 | 2.29057 | 1.61113 |
| Lgals9    | 2.40917 | 0.002   | 2.04042 | 2.52343 | 3.53764 | 10.3443 | 9.02528 | 4.4708  |
| Stc2      | 2.40685 | 0.01264 | 0.15167 | 0.17367 | 0.15879 | 0.5818  | 0.49255 | 0.34189 |
| Cd6       | 2.40517 | 0.04025 | 0.48676 | 0.35204 | 0.53108 | 1.39657 | 1.59746 | 1.00488 |
| Ptpro     | 2.40349 | 0.02606 | 0.12972 | 0.1114  | 0.19556 | 0.44784 | 0.55607 | 0.26317 |
| Ifitm3    | 2.40209 | 0.00226 | 8.48924 | 16.4596 | 21.5735 | 62.8716 | 51.1293 | 22.4422 |
| Lat2      | 2.3986  | 0.00238 | 0.96491 | 1.02872 | 1.31678 | 3.11367 | 4.44113 | 3.5102  |
| Zfp385a   | 2.39626 | 0.00075 | 0.64711 | 1.14421 | 1.14777 | 2.97424 | 3.37486 | 2.21385 |
| Ptpn22    | 2.39332 | 0.00284 | 0.84272 | 0.79379 | 0.81968 | 2.32164 | 2.67502 | 2.13255 |
| Vstm4     | 2.38938 | 0.00041 | 0.85903 | 0.84706 | 1.0193  | 2.60157 | 3.37876 | 1.93646 |
| Gm5431    | 2.38853 | 0.00817 | 0.45162 | 0.27151 | 0.4681  | 1.18992 | 1.47402 | 0.85517 |
| Wdhd1     | 2.38779 | 0.00156 | 0.33952 | 0.20828 | 0.37705 | 1.04659 | 0.88604 | 0.72162 |
| Nrros     | 2.38298 | 5.3E-05 | 1.39883 | 1.61377 | 1.61317 | 5.46299 | 4.86153 | 3.1627  |
| Ifi30     | 2.38221 | 1.1E-05 | 8.27582 | 9.47672 | 11.6552 | 31.8546 | 29.9978 | 22.6275 |
| Prkcb     | 2.38215 | 0.00675 | 0.82635 | 0.9778  | 1.12471 | 2.58602 | 3.38142 | 2.43405 |
| Ppa1      | 2.38025 | 0.00493 | 0.24041 | 0.41294 | 1.01938 | 1.96579 | 1.66885 | 1.09742 |
| Sparc     | 2.37929 | 3.3E-05 | 42.9822 | 46.6424 | 56.9008 | 167.459 | 159.231 | 98.8641 |
| Emcn      | 2.37779 | 0.00192 | 0.45144 | 0.4154  | 0.5621  | 1.75779 | 1.5551  | 0.82865 |
| Lrrc8c    | 2.37691 | 9.6E-06 | 1.70906 | 1.96685 | 2.40486 | 6.97708 | 6.77144 | 3.89885 |
| Tspan32   | 2.37531 | 0.0132  | 0.55117 | 0.47336 | 0.4905  | 1.33538 | 1.22316 | 1.03539 |
| Pdgfc     | 2.37027 | 0.00422 | 0.11996 | 0.22076 | 0.35524 | 0.5605  | 0.88488 | 0.55627 |
| Kif2c     | 2.37009 | 0.02684 | 0.1599  | 0.1545  | 0.20718 | 0.6356  | 0.4479  | 0.43255 |
| Havcr2    | 2.36782 | 0.00643 | 0.73715 | 0.71566 | 0.72479 | 2.56246 | 2.5605  | 1.21376 |
| Kif15     | 2.36326 | 0.04325 | 0.26262 | 0.16333 | 0.15359 | 0.70758 | 0.60878 | 0.3552  |
| H2-Eb1    | 2.36187 | 0.00238 | 28.0626 | 31.8184 | 46.0836 | 98.7058 | 121.204 | 79.7968 |
| B3gnt7    | 2.36086 | 0.00722 | 0.34606 | 0.3658  | 0.4515  | 1.08836 | 1.11523 | 1.26017 |
| Col4a1    | 2.35946 | 3.9E-06 | 23.1431 | 24.0304 | 34.6877 | 93.0446 | 91.3547 | 62.604  |
| Tnfaip3   | 2.35901 | 4.2E-08 | 0.8448  | 1.01576 | 1.0917  | 2.73026 | 3.35109 | 2.35055 |
| Atp6v0c   | 2.35639 | 0.03798 | 4.61293 | 5.843   | 8.11048 | 15.898  | 18.2032 | 8.60937 |
| Lrp12     | 2.35617 | 2.9E-05 | 0.66731 | 0.8351  | 0.79047 | 2.37316 | 2.82349 | 1.41831 |
| Hells     | 2.35444 | 0.00095 | 0.22997 | 0.23909 | 0.33075 | 0.95673 | 0.89623 | 0.42564 |
| Ptpn      | 2.35312 | 0.018   | 0.18472 | 0.22915 | 0.19339 | 0.52212 | 0.73987 | 0.4164  |
| Clmp      | 2.3531  | 0.00463 | 0.3989  | 0.50573 | 0.64436 | 1.58775 | 1.73964 | 1.2846  |
| Tnfrsf10b | 2.35205 | 0.0013  | 0.49503 | 0.51962 | 0.75151 | 1.47421 | 2.22393 | 1.33909 |
| March3    | 2.35173 | 0.00039 | 0.23232 | 0.24941 | 0.34205 | 0.76515 | 0.91953 | 0.62845 |
| H2-Ab1    | 2.35053 | 0.00107 | 18.3258 | 21.3664 | 29.3655 | 70.5201 | 72.2487 | 51.8066 |
| Cd74      | 2.34546 | 0.00212 | 73.9718 | 79.5711 | 131.535 | 318.334 | 296.594 | 188.89  |
| Tmem106a  | 2.34243 | 0.0004  | 1.00047 | 0.93084 | 1.15221 | 3.38341 | 2.89715 | 2.44323 |
| Spn       | 2.3424  | 0.00037 | 0.93151 | 1.00801 | 1.61503 | 4.11311 | 3.32164 | 2.545   |
| Ubash3b   | 2.34073 | 2.1E-05 | 0.44044 | 0.43961 | 0.44867 | 1.2762  | 1.58889 | 0.86942 |
| Themis2   | 2.33916 | 7.1E-06 | 1.18958 | 1.33788 | 1.6013  | 4.3489  | 3.8357  | 3.44776 |
| Rtn4rl2   | 2.33764 | 0.04449 | 0.23163 | 0.54705 | 0.6002  | 0.947   | 1.63611 | 1.40978 |
| Irgm1     | 2.33566 | 0.00586 | 0.99065 | 1.30199 | 1.27291 | 4.41846 | 3.62673 | 2.19256 |
| Fermt3    | 2.3329  | 3.7E-05 | 1.92147 | 1.82392 | 2.50935 | 5.84977 | 6.14165 | 5.47129 |
| Sh3bp2    | 2.33266 | 0.00061 | 1.17738 | 1.02861 | 1.18593 | 2.89559 | 3.38198 | 3.21238 |
| Runx2     | 2.33183 | 0.00238 | 0.29605 | 0.33901 | 0.38125 | 1.11178 | 0.92301 | 0.68072 |
| Slco5a1   | 2.32512 | 0.00839 | 0.11949 | 0.08552 | 0.07506 | 0.27141 | 0.32338 | 0.19753 |

|          |         |         |         |         |         |         |         |         |
|----------|---------|---------|---------|---------|---------|---------|---------|---------|
| Pld3     | 2.31448 | 0.00032 | 3.0123  | 2.71513 | 4.35597 | 11.0828 | 10.083  | 6.97868 |
| Ifi209   | 2.31165 | 0.02275 | 0.86052 | 0.73904 | 0.71818 | 3.06028 | 2.61099 | 1.69595 |
| Nme2     | 2.31039 | 0.00517 | 1.71287 | 6.6518  | 5.0525  | 15.6976 | 15.5999 | 10.8786 |
| Pik3r5   | 2.31007 | 8.7E-05 | 1.27276 | 1.13357 | 1.27331 | 3.52619 | 3.50576 | 3.20914 |
| H2-T23   | 2.3089  | 9.5E-06 | 7.51634 | 7.93298 | 9.24413 | 17.8814 | 19.0281 | 13.3507 |
| H2-Aa    | 2.30456 | 0.00229 | 16.0082 | 19.4236 | 28.9404 | 68.7892 | 67.7362 | 42.0447 |
| Bcl3     | 2.30157 | 0.00307 | 0.91612 | 1.30124 | 1.89247 | 4.09767 | 3.43293 | 3.81259 |
| Anxa1    | 2.30134 | 2.3E-05 | 7.49022 | 8.09849 | 9.38943 | 28.1931 | 29.9071 | 13.161  |
| Gnpda1   | 2.29815 | 0.00934 | 0.80208 | 1.12721 | 1.30543 | 2.98115 | 3.23236 | 1.97244 |
| Ifit3b   | 2.29387 | 0.01417 | 1.04649 | 0.93621 | 1.39694 | 3.48622 | 3.22867 | 1.94621 |
| Sirpa    | 2.28803 | 1.1E-06 | 4.86558 | 5.12427 | 5.57192 | 16.2143 | 15.7266 | 11.3605 |
| Elovl1   | 2.28726 | 0.00085 | 5.88635 | 4.94549 | 8.1088  | 21.2177 | 20.6334 | 11.0769 |
| Hck      | 2.28663 | 0.00184 | 2.00094 | 1.61107 | 2.19967 | 5.71897 | 5.88906 | 4.45421 |
| Tspan8   | 2.28006 | 0.00107 | 2.75031 | 3.64149 | 4.48119 | 13.0666 | 12.1139 | 5.26986 |
| Vav1     | 2.27428 | 0.00359 | 2.17546 | 1.64497 | 1.96075 | 5.37095 | 5.50613 | 4.98929 |
| Eef1e1   | 2.27354 | 0.02475 | 0.42252 | 0.87089 | 0.9555  | 2.45682 | 2.38758 | 1.37153 |
| Rcan1    | 2.27285 | 8.1E-05 | 3.16676 | 3.40711 | 3.54138 | 6.82928 | 9.79843 | 10.5903 |
| Olfm1    | 2.2671  | 0.00011 | 1.32542 | 1.53883 | 1.73459 | 5.44123 | 4.08922 | 3.1206  |
| Pmaip1   | 2.26647 | 0.00082 | 0.62621 | 0.53781 | 0.90061 | 2.06615 | 2.31197 | 1.24817 |
| Ly6a     | 2.26643 | 0.02315 | 5.71734 | 9.69617 | 15.0708 | 37.0847 | 31.8001 | 14.6828 |
| Kcnk13   | 2.263   | 0.01274 | 0.25221 | 0.33694 | 0.52811 | 1.09479 | 0.81907 | 1.13707 |
| Dock11   | 2.25898 | 0.00181 | 0.50965 | 0.53498 | 0.56027 | 1.80931 | 1.89424 | 0.79145 |
| Pim1     | 2.25724 | 1.3E-06 | 3.63641 | 4.51424 | 3.80028 | 10.9628 | 10.1455 | 9.74735 |
| Fam105a  | 2.24773 | 0.00287 | 0.83202 | 1.05861 | 0.98724 | 3.13569 | 3.03232 | 1.75052 |
| Rab8b    | 2.24258 | 0.0051  | 1.60301 | 2.24706 | 2.91678 | 7.416   | 7.52172 | 3.56373 |
| Dock2    | 2.2413  | 0.00359 | 2.00749 | 1.67165 | 2.2728  | 6.32471 | 5.68168 | 4.23285 |
| Rpl39    | 2.23681 | 0.04834 | 3.46641 | 4.90955 | 6.01687 | 15.6365 | 13.5683 | 6.16903 |
| Nme1     | 2.23626 | 0.04374 | 0.73064 | 1.12054 | 1.15564 | 2.58418 | 3.20334 | 2.2941  |
| Kif20b   | 2.23393 | 0.00788 | 0.36056 | 0.47122 | 0.4136  | 1.6664  | 1.11494 | 0.63609 |
| Serpine2 | 2.23361 | 0.00021 | 4.16752 | 5.48303 | 6.66326 | 16.1123 | 16.3278 | 11.4234 |
| Plcl2    | 2.23054 | 1.5E-05 | 0.81824 | 0.70273 | 1.07535 | 2.58239 | 2.76923 | 1.63094 |
| Fstl1    | 2.22948 | 0.00023 | 6.15813 | 8.68765 | 10.7357 | 25.3788 | 25.1402 | 15.4581 |
| Rad18    | 2.22807 | 0.00555 | 0.25578 | 0.25844 | 0.2552  | 0.72452 | 0.7916  | 0.56982 |
| Arpc1b   | 2.22382 | 1.8E-08 | 3.81906 | 4.7149  | 5.78345 | 13.9257 | 14.302  | 9.1087  |
| Mcemp1   | 2.21676 | 0.01077 | 0.81721 | 0.70184 | 0.77003 | 2.12135 | 2.44544 | 1.57901 |
| Sesn2    | 2.21287 | 3.2E-06 | 1.7316  | 1.74579 | 1.89176 | 5.15295 | 5.28127 | 3.97133 |
| Ugcg     | 2.21062 | 0.00019 | 1.60628 | 2.14114 | 2.88521 | 7.02328 | 7.17279 | 3.64356 |
| Stx11    | 2.20922 | 0.00176 | 0.94633 | 0.40637 | 0.8231  | 1.98411 | 2.05675 | 1.723   |
| Itk      | 2.20868 | 0.00269 | 0.48865 | 0.44765 | 0.49114 | 1.21349 | 1.44412 | 1.18965 |
| Myo1g    | 2.20245 | 0.00324 | 1.94296 | 1.55025 | 2.14971 | 5.05665 | 4.87293 | 4.88287 |
| Txk      | 2.20172 | 0.04198 | 0.1148  | 0.10955 | 0.13221 | 0.27813 | 0.43495 | 0.24153 |
| Zmynd15  | 2.20087 | 0.01499 | 1.12743 | 0.78141 | 0.89461 | 1.95879 | 2.23541 | 2.67525 |
| Lptm5    | 2.19948 | 2E-05   | 7.25195 | 7.75066 | 9.17615 | 24.2633 | 22.2954 | 17.6243 |
| Fkbp10   | 2.19349 | 0.00199 | 1.51536 | 1.76077 | 2.51979 | 5.56111 | 4.95026 | 3.85805 |
| Syn2     | 2.19122 | 0.00564 | 0.31008 | 0.20239 | 0.36231 | 0.8001  | 0.78548 | 0.73814 |
| Srxn1    | 2.18724 | 0.00078 | 1.17514 | 1.46075 | 1.74837 | 4.32687 | 4.00721 | 3.22067 |
| Cd4      | 2.18722 | 0.01317 | 0.41095 | 0.48296 | 0.3057  | 1.17905 | 1.28543 | 0.7606  |
| Eno1     | 2.18638 | 0.00182 | 2.01036 | 3.11895 | 4.99547 | 10.1342 | 9.90388 | 5.41627 |
| Nrep     | 2.18449 | 1E-04   | 6.17706 | 7.15289 | 9.41739 | 20.7461 | 23.8362 | 15.3483 |
| H2-DMa   | 2.18448 | 0.00999 | 2.39143 | 3.05794 | 4.70706 | 10.6222 | 8.69842 | 7.11593 |
| Il4ra    | 2.18398 | 6.1E-08 | 5.44866 | 5.49059 | 6.39368 | 16.7784 | 14.3543 | 14.7391 |
| Adamts7  | 2.18311 | 0.00239 | 0.22211 | 0.32191 | 0.2747  | 0.69369 | 0.79798 | 0.56328 |
| Fgd3     | 2.18138 | 0.0011  | 0.72528 | 0.66027 | 0.92944 | 1.93732 | 2.27534 | 1.84422 |
| Tbc1d2   | 2.18008 | 1.5E-06 | 0.78768 | 0.9388  | 0.93912 | 2.74575 | 2.41191 | 1.89158 |
| Grn      | 2.18001 | 0.00093 | 5.37203 | 6.74803 | 10.6915 | 23.5599 | 23.9927 | 12.5625 |
| Napsa    | 2.17986 | 0.02637 | 4.16367 | 4.42059 | 9.4839  | 16.4124 | 18.8456 | 8.38079 |



|          |         |         |         |         |         |         |         |         |
|----------|---------|---------|---------|---------|---------|---------|---------|---------|
| Glrx     | 2.17931 | 0.01154 | 1.03741 | 1.55919 | 1.40519 | 4.24143 | 4.42197 | 2.01702 |
| Cenpl    | 2.17843 | 0.03952 | 0.13437 | 0.14425 | 0.20575 | 0.47307 | 0.36002 | 0.45436 |
| Ier3     | 2.17656 | 0.00032 | 8.1733  | 9.86703 | 9.15458 | 23.3283 | 22.9879 | 24.4038 |
| Trim30a  | 2.17412 | 0.00011 | 1.78191 | 2.11336 | 2.13878 | 6.82273 | 6.20031 | 3.44301 |
| Crlf2    | 2.17343 | 0.00028 | 3.20831 | 2.95579 | 3.13303 | 7.15476 | 7.50192 | 9.46771 |
| Rab32    | 2.17261 | 0.01798 | 0.66192 | 1.13695 | 0.50676 | 2.70623 | 2.09591 | 1.39886 |
| Slc35f6  | 2.16925 | 0.00238 | 0.75709 | 1.07692 | 1.62741 | 3.89068 | 3.08879 | 2.048   |
| Rnf180   | 2.16904 | 0.01825 | 0.35327 | 0.82352 | 0.66576 | 1.55897 | 1.86844 | 1.5017  |
| Arhgap22 | 2.16849 | 0.04719 | 0.58498 | 0.46376 | 0.44521 | 1.63534 | 1.1618  | 1.58243 |
| Tlr3     | 2.16733 | 0.00282 | 0.43545 | 0.66166 | 0.6786  | 1.68903 | 2.12127 | 0.8608  |
| Sbno2    | 2.16657 | 0.00208 | 6.64321 | 6.2724  | 7.65939 | 15.7827 | 15.1558 | 21.012  |
| Ncf2     | 2.16648 | 0.00041 | 1.44786 | 1.0092  | 1.12701 | 3.46975 | 3.65946 | 2.5543  |
| Uhrf1    | 2.1656  | 0.01577 | 0.71666 | 0.63308 | 1.21552 | 2.84633 | 2.59343 | 1.21857 |
| Casp3    | 2.15984 | 0.00063 | 0.80531 | 1.07091 | 1.27286 | 3.02107 | 3.41682 | 1.82708 |
| Ncapd2   | 2.15968 | 0.00012 | 2.76916 | 2.70092 | 2.33395 | 4.79161 | 5.05695 | 3.21841 |
| Ikzf3    | 2.15857 | 0.04325 | 0.97628 | 0.81279 | 0.79789 | 2.33515 | 2.18381 | 2.22322 |
| Pappa2   | 2.1577  | 0.02002 | 0.14402 | 0.13824 | 0.19957 | 0.44642 | 0.58602 | 0.22917 |
| Cd248    | 2.15567 | 0.00055 | 1.05603 | 1.25803 | 1.73334 | 3.74496 | 3.48489 | 3.22525 |
| Psmb9    | 2.15402 | 0.00205 | 1.14402 | 1.28956 | 1.54959 | 3.74616 | 3.64567 | 2.99796 |
| Dhfr     | 2.1532  | 0.03599 | 0.14837 | 0.21237 | 0.23301 | 0.71893 | 0.44972 | 0.37905 |
| Lpl      | 2.15319 | 0.00238 | 2.15138 | 2.46356 | 3.58377 | 8.854   | 6.88702 | 5.30004 |
| Hcls1    | 2.15307 | 0.00216 | 3.212   | 2.96621 | 3.15675 | 8.62926 | 7.50383 | 7.98803 |
| Fam49b   | 2.15221 | 0.00059 | 1.14954 | 1.35507 | 1.63539 | 4.44389 | 4.17248 | 2.25599 |
| Apbb1ip  | 2.15202 | 0.00052 | 0.88219 | 0.74755 | 0.86451 | 2.96026 | 2.07427 | 1.5273  |
| Klhdc8a  | 2.14754 | 0.00064 | 0.81712 | 0.75441 | 0.71221 | 2.13439 | 1.87086 | 1.93409 |
| Lhx6     | 2.14721 | 0.02813 | 0.21779 | 0.23381 | 0.35913 | 0.72554 | 0.63657 | 0.73643 |
| Tap1     | 2.14253 | 0.02511 | 2.67547 | 2.73545 | 3.4514  | 8.79716 | 7.77345 | 6.24654 |
| Cdh11    | 2.14018 | 0.01419 | 1.06757 | 1.58138 | 1.8919  | 5.14334 | 4.68528 | 2.21226 |
| Plxnc1   | 2.14    | 0.00013 | 1.13517 | 1.42415 | 1.57299 | 3.52885 | 4.4239  | 2.76967 |
| Crlf1    | 2.13731 | 0.00679 | 1.11397 | 1.36673 | 1.29958 | 3.85559 | 3.61773 | 2.36765 |
| Fam20c   | 2.13692 | 1.8E-05 | 0.97058 | 1.06413 | 1.32318 | 2.7205  | 3.23925 | 2.68136 |
| Nlrc5    | 2.13533 | 0.04564 | 2.14605 | 2.12529 | 2.54463 | 6.2785  | 5.64232 | 5.47192 |
| Mirt1    | 2.13479 | 0.00536 | 0.21138 | 0.31985 | 0.21814 | 0.8322  | 0.57859 | 0.54456 |
| Hn1      | 2.13359 | 1.6E-05 | 2.31309 | 3.17152 | 4.28264 | 8.81178 | 9.44933 | 6.75108 |
| Cfp      | 2.13351 | 0.00489 | 1.1554  | 1.03544 | 1.75139 | 3.24049 | 4.16015 | 2.71778 |
| Sdcbp    | 2.13326 | 0.00062 | 2.47577 | 3.33043 | 4.28481 | 10.0991 | 10.9037 | 4.647   |
| Nfam1    | 2.133   | 0.01936 | 1.05559 | 1.25525 | 1.96379 | 5.06575 | 3.87643 | 2.12328 |
| H2-DMb1  | 2.13063 | 0.00172 | 4.22825 | 3.48005 | 4.48218 | 12.0582 | 10.9854 | 8.8166  |
| Ctsc     | 2.12763 | 0.0035  | 4.39942 | 3.946   | 5.94228 | 16.4658 | 14.8337 | 6.45811 |
| Fmn1     | 2.12378 | 0.00288 | 0.31718 | 0.23349 | 0.35758 | 0.84908 | 0.81119 | 0.61286 |
| Arhgap19 | 2.12135 | 0.00135 | 0.96709 | 0.78685 | 1.15106 | 2.06559 | 3.00849 | 2.31773 |
| Flt3     | 2.12012 | 0.01684 | 0.48009 | 0.40019 | 0.57213 | 1.18027 | 1.34821 | 1.165   |
| Abcb1b   | 2.11923 | 0.00174 | 0.18656 | 0.5098  | 0.52737 | 1.01698 | 1.00795 | 0.96343 |
| Snx20    | 2.11446 | 0.03359 | 1.84784 | 1.85148 | 1.35424 | 3.91731 | 3.95069 | 4.99855 |
| Nav3     | 2.11021 | 0.00379 | 0.12002 | 0.10307 | 0.11904 | 0.32138 | 0.26463 | 0.29048 |
| Zfp365   | 2.10869 | 0.00394 | 0.48588 | 0.58996 | 0.58413 | 1.40046 | 1.82826 | 1.04242 |
| Hist1h1d | 2.10806 | 0.03599 | 4.10251 | 4.53004 | 6.29553 | 16.7197 | 8.67921 | 11.8903 |
| Frrs1    | 2.1063  | 0.0002  | 0.62463 | 0.54677 | 0.58857 | 1.84439 | 1.61504 | 1.05604 |
| Plcg2    | 2.10554 | 0.01443 | 2.11019 | 1.84715 | 1.95013 | 4.97737 | 4.68513 | 5.21425 |
| Fras1    | 2.10432 | 0.02624 | 0.22653 | 0.09727 | 0.16705 | 0.29977 | 0.62852 | 0.33303 |
| Ctsk     | 2.10221 | 0.0155  | 1.61496 | 2.03093 | 2.98911 | 7.54593 | 6.46228 | 2.9644  |
| Prox1    | 2.10078 | 0.00733 | 0.23907 | 0.22317 | 0.28403 | 0.66106 | 0.6785  | 0.44988 |
| Slc25a45 | 2.0974  | 0.00215 | 0.62526 | 0.9892  | 0.77522 | 2.57131 | 2.34054 | 1.20177 |
| Ifit3    | 2.09641 | 0.03545 | 6.44687 | 5.5797  | 7.72287 | 20.5232 | 15.8244 | 7.36777 |
| Tgfb1    | 2.09444 | 7.6E-05 | 3.07452 | 2.97056 | 4.2852  | 9.54396 | 10.1097 | 6.49753 |
| Pou2f2   | 2.09379 | 0.01852 | 0.61362 | 0.43613 | 0.4785  | 1.13422 | 1.33998 | 1.3737  |

|           |          |         |         |         |         |         |         |         |
|-----------|----------|---------|---------|---------|---------|---------|---------|---------|
| Vmp1      | 2.09314  | 1.5E-07 | 4.31296 | 5.64343 | 7.97902 | 16.7615 | 18.2822 | 10.2925 |
| Stat1     | 2.09257  | 0.00455 | 2.78622 | 3.03592 | 3.71254 | 9.75767 | 9.06452 | 5.22939 |
| Nek6      | 2.09021  | 0.00111 | 0.60233 | 0.86683 | 1.08143 | 2.15201 | 2.5139  | 1.28807 |
| Bgn       | 2.08809  | 0.01389 | 19.4339 | 23.9846 | 35.0787 | 88.9723 | 75.1879 | 36.4482 |
| Cmtm3     | 2.08629  | 0.00089 | 1.6063  | 1.35446 | 1.92636 | 4.19247 | 5.03643 | 3.12063 |
| Metrl1    | 2.08555  | 0.04704 | 1.5396  | 0.85003 | 1.70978 | 2.79761 | 4.33932 | 3.12357 |
| Itga5     | 2.08406  | 0.00149 | 2.04178 | 3.79373 | 4.77278 | 7.77696 | 9.52556 | 8.57687 |
| C5ar1     | 2.0831   | 0.004   | 0.78046 | 0.93257 | 1.21501 | 2.46637 | 2.38034 | 2.47837 |
| Arhgap11a | 2.07314  | 0.02637 | 0.93226 | 1.06754 | 0.86303 | 2.42214 | 2.51771 | 2.25639 |
| Nlrp3     | 2.06965  | 0.01469 | 0.23645 | 0.35076 | 0.4456  | 0.80072 | 0.90054 | 0.90128 |
| Enpp1     | 2.0659   | 0.00431 | 0.14454 | 0.26287 | 0.24835 | 0.51756 | 0.73724 | 0.41399 |
| Disp2     | 2.06436  | 0.00443 | 0.48373 | 0.80736 | 1.0234  | 2.28866 | 1.90293 | 1.51838 |
| Tuba1c    | 2.06344  | 0.00181 | 2.29378 | 2.34881 | 3.61612 | 7.69479 | 7.09115 | 7.04012 |
| Sgpl1     | 2.06323  | 0.00017 | 1.64677 | 2.01171 | 2.40781 | 5.66221 | 6.8326  | 2.89935 |
| Gusb      | 2.06165  | 0.00012 | 1.76409 | 2.05851 | 2.51145 | 5.15672 | 6.44523 | 4.17552 |
| Dab2      | 2.05874  | 0.02839 | 1.11652 | 1.59138 | 1.66764 | 4.48933 | 4.30495 | 2.26522 |
| Marcks1   | 2.0579   | 6.6E-05 | 2.77108 | 3.26652 | 4.04466 | 8.29347 | 8.52296 | 8.01044 |
| Ifit2     | 2.05644  | 0.01486 | 1.26581 | 1.18248 | 1.44384 | 4.17649 | 3.93777 | 1.77213 |
| Rnf149    | 2.05467  | 2.4E-05 | 2.39683 | 2.50711 | 2.92442 | 6.53289 | 7.57439 | 6.02643 |
| Psmb8     | 2.05184  | 0.02258 | 2.03994 | 2.13521 | 2.67303 | 7.21083 | 6.52143 | 4.18177 |
| Dpp7      | 2.05146  | 0.00075 | 0.78401 | 0.83044 | 0.83725 | 2.32687 | 2.29153 | 1.48456 |
| Rab11fip5 | 2.05027  | 8.9E-07 | 1.50947 | 1.69997 | 2.16033 | 4.20485 | 4.80043 | 4.16029 |
| Adap1     | 2.05007  | 0.00539 | 0.8477  | 0.9328  | 0.62404 | 2.21427 | 2.21962 | 1.61234 |
| Cpxm1     | 2.04978  | 0.02231 | 2.04393 | 2.40211 | 2.87201 | 6.28776 | 7.40648 | 4.51049 |
| Nrp2      | 2.04951  | 9.4E-06 | 1.55386 | 1.65706 | 2.21358 | 5.07162 | 5.01524 | 3.35668 |
| Clec10a   | 2.04933  | 0.04952 | 0.24066 | 0.64588 | 0.56691 | 1.1479  | 1.23095 | 1.17993 |
| Nt5e      | 2.04915  | 0.00666 | 1.1922  | 1.4805  | 1.62434 | 4.5376  | 4.45779 | 1.89577 |
| Plekho2   | 2.04865  | 4.5E-05 | 1.69793 | 2.55192 | 2.94798 | 5.65639 | 6.08096 | 5.7413  |
| Cd38      | 2.04865  | 0.01405 | 1.1201  | 1.05359 | 2.06061 | 4.04642 | 4.33919 | 2.12818 |
| Tgfb2     | 2.04761  | 0.00067 | 1.12944 | 1.15106 | 1.73116 | 4.00882 | 3.60928 | 2.09792 |
| Slc36a1   | 2.04752  | 3E-06   | 1.42608 | 1.41114 | 2.11787 | 4.07006 | 4.92331 | 3.22869 |
| Col1a2    | 2.04698  | 0.00242 | 37.349  | 42.814  | 40.3317 | 78.6317 | 98.4478 | 112.723 |
| Mfsd7a    | 2.04535  | 0.01902 | 0.62589 | 0.8063  | 0.65529 | 1.76914 | 1.79551 | 1.64606 |
| Gja4      | 2.04462  | 0.01173 | 3.20883 | 2.84474 | 4.73045 | 12.8841 | 8.16873 | 5.67009 |
| Ckap4     | 2.04449  | 4E-06   | 3.81127 | 5.26144 | 6.06523 | 14.1074 | 12.075  | 10.8444 |
| Panx1     | 2.04326  | 0.01947 | 0.31817 | 0.3602  | 0.42245 | 0.94606 | 1.09905 | 0.68463 |
| Gimap3    | 2.04102  | 0.00229 | 1.89508 | 1.91819 | 2.39154 | 5.16532 | 5.83577 | 4.94327 |
| Rhod      | 2.03784  | 0.04933 | 0.86495 | 0.43697 | 1.00679 | 2.2651  | 1.58628 | 1.30752 |
| Psd4      | 2.03467  | 0.01317 | 0.76952 | 0.70537 | 0.76693 | 2.0235  | 1.90317 | 1.60125 |
| Gja1      | 2.03311  | 0.02221 | 2.55584 | 3.25638 | 3.51982 | 10.6919 | 9.19427 | 3.7228  |
| Cdkn2c    | 2.03027  | 0.00619 | 0.71428 | 0.80864 | 1.49906 | 2.27136 | 3.19488 | 1.88828 |
| B3gnt5    | 2.02704  | 0.02179 | 0.35239 | 0.30264 | 0.49016 | 1.03671 | 1.07902 | 0.68088 |
| Serinc2   | 2.0251   | 0.03794 | 0.82733 | 0.61364 | 0.815   | 1.98166 | 2.12504 | 1.42417 |
| Scn3b     | 2.02385  | 0.00259 | 2.37941 | 2.85268 | 3.43078 | 8.35704 | 8.33935 | 4.70857 |
| Sh3kbp1   | 2.02011  | 0.00028 | 0.98432 | 0.78604 | 1.02513 | 2.36912 | 2.52371 | 1.95029 |
| Trpv2     | 2.01205  | 0.00119 | 1.04999 | 0.88507 | 1.31917 | 2.50858 | 2.70903 | 2.60362 |
| Ncaph     | 2.00994  | 0.02996 | 0.40496 | 0.38257 | 0.53421 | 1.08537 | 1.42036 | 0.71204 |
| Coro1a    | 2.00951  | 0.0473  | 5.60911 | 4.8442  | 6.20064 | 13.4094 | 13.708  | 12.8844 |
| Fzd1      | 2.00801  | 4.8E-05 | 3.28301 | 3.53337 | 5.48213 | 10.0055 | 11.6202 | 7.92529 |
| Tmsb10    | 2.00678  | 0.00247 | 16.9494 | 19.722  | 31.9419 | 67.4344 | 50.8058 | 47.4211 |
| Bend4     | 2.00395  | 0.00848 | 0.16761 | 0.19698 | 0.30755 | 0.58507 | 0.70475 | 0.33407 |
| Arhgap15  | 2.00091  | 0.00248 | 0.6725  | 0.56907 | 0.65232 | 1.61735 | 1.59948 | 1.31087 |
| Phf24     | -2.00086 | 0.01939 | 0.45331 | 0.49454 | 0.76193 | 0.31168 | 0.37004 | 0.34799 |
| Tef       | -2.00483 | 6E-05   | 20.269  | 19.3027 | 20.6556 | 13.4891 | 15.3185 | 8.32337 |
| Aldh5a1   | -2.00604 | 0.02355 | 1.359   | 1.32631 | 1.41151 | 1.01022 | 0.82753 | 0.75195 |
| Sec14l2   | -2.0063  | 0.00353 | 1.46797 | 1.38895 | 2.20379 | 1.2207  | 1.01812 | 0.77401 |

|               |          |         |         |         |         |         |         |         |
|---------------|----------|---------|---------|---------|---------|---------|---------|---------|
| Fam131a       | -2.00638 | 0.02981 | 3.36237 | 3.04522 | 3.22587 | 1.61075 | 2.11444 | 2.06715 |
| Plpp3         | -2.00832 | 0.00158 | 14.8797 | 19.3702 | 24.1915 | 13.6694 | 13.6094 | 7.99041 |
| Tox2          | -2.00995 | 0.03533 | 2.10262 | 1.91591 | 2.41615 | 1.23473 | 1.1242  | 1.45662 |
| Gnao1         | -2.0101  | 0.00381 | 3.01439 | 2.81397 | 2.72511 | 1.81787 | 1.91535 | 1.48902 |
| Hs6st2        | -2.01033 | 0.00219 | 0.51384 | 0.72911 | 0.83152 | 0.42625 | 0.45709 | 0.3626  |
| Ift88         | -2.01331 | 0.00085 | 3.65563 | 4.1915  | 3.67542 | 2.08866 | 2.75383 | 2.11539 |
| Fermt1        | -2.01359 | 0.04388 | 0.59679 | 0.69653 | 0.60559 | 0.37538 | 0.40254 | 0.37254 |
| Ppp1r26       | -2.01432 | 0.00018 | 1.27265 | 1.39956 | 1.66716 | 0.84605 | 0.78629 | 0.98661 |
| Abcc3         | -2.01442 | 0.00061 | 4.85167 | 5.32347 | 6.72038 | 3.9491  | 3.92169 | 2.31846 |
| Myh11         | -2.0147  | 0.00276 | 20.9077 | 29.577  | 37.4438 | 17.3231 | 17.5387 | 16.4336 |
| Rfx2          | -2.01532 | 0.00049 | 2.75694 | 3.10487 | 3.45554 | 1.74864 | 1.82448 | 2.00515 |
| Foxa1         | -2.01653 | 0.00331 | 3.82969 | 4.86312 | 5.28404 | 3.20607 | 2.85171 | 2.29392 |
| Cdhr3         | -2.01714 | 0.00026 | 10.8677 | 10.551  | 11.7708 | 6.43947 | 7.39451 | 6.0314  |
| Jag1          | -2.01933 | 5.1E-06 | 7.54293 | 9.30585 | 9.80099 | 5.3302  | 5.87624 | 4.67597 |
| Chchd10       | -2.02851 | 0.00991 | 11.5162 | 13.3203 | 18.7274 | 10.2943 | 9.95329 | 5.65265 |
| D630039A03Rik | -2.02858 | 0.01458 | 2.15708 | 1.58792 | 1.59701 | 1.0639  | 1.32101 | 0.83358 |
| Cyb5rl        | -2.03149 | 0.00179 | 0.96245 | 0.7661  | 0.80735 | 0.58651 | 0.5489  | 0.381   |
| 1700007K13Rik | -2.03154 | 0.04345 | 5.33186 | 5.58815 | 6.30137 | 3.69477 | 4.40233 | 2.20014 |
| Adam28        | -2.0354  | 0.00129 | 3.81533 | 3.09356 | 3.57275 | 2.02387 | 2.44736 | 1.82697 |
| Cracr2b       | -2.03875 | 0.02487 | 14.5136 | 13.1421 | 13.1109 | 8.11242 | 6.60906 | 8.23615 |
| Adam22        | -2.04111 | 8.4E-05 | 1.06951 | 1.19409 | 1.40415 | 0.73849 | 0.89612 | 0.54005 |
| Wdpcp         | -2.04135 | 0.0071  | 1.02874 | 0.99711 | 1.31555 | 0.82784 | 0.84478 | 0.29816 |
| Kank3         | -2.04562 | 0.01013 | 25.9273 | 22.8197 | 28.4365 | 14.4082 | 16.4316 | 16.3423 |
| Kif21a        | -2.04564 | 3.9E-05 | 5.45468 | 5.36711 | 6.56117 | 3.29166 | 3.73977 | 3.16967 |
| Cyp2b10       | -2.04762 | 0.01449 | 17.7966 | 19.327  | 24.5897 | 14.3684 | 15.2068 | 7.42784 |
| Map9          | -2.04991 | 0.01282 | 1.37263 | 1.54935 | 1.4412  | 1.03331 | 0.86608 | 0.68957 |
| Tle2          | -2.05019 | 0.00563 | 4.9905  | 4.44251 | 4.5439  | 2.98029 | 2.71789 | 2.63548 |
| Ppp1r9a       | -2.05187 | 9.8E-06 | 4.51912 | 4.38113 | 4.72195 | 3.05893 | 2.70138 | 2.28907 |
| Rbp4          | -2.05215 | 0.04025 | 3.02571 | 3.7535  | 4.18152 | 2.99336 | 2.35832 | 1.0913  |
| Rsph9         | -2.05384 | 0.00094 | 3.15733 | 3.5064  | 4.36    | 2.42346 | 2.54577 | 1.47256 |
| Mtcl1         | -2.0559  | 0.00074 | 8.40272 | 8.06505 | 8.75108 | 4.38565 | 5.18884 | 5.06526 |
| Ctxn1         | -2.05663 | 0.02585 | 6.69167 | 7.72449 | 6.30537 | 3.6609  | 4.4866  | 4.08744 |
| Mcf2l         | -2.05957 | 0.00032 | 4.42872 | 4.36702 | 4.57877 | 2.11121 | 2.84992 | 2.79165 |
| Clcn2         | -2.06061 | 0.00324 | 0.81096 | 0.80842 | 0.9006  | 0.61839 | 0.40916 | 0.4505  |
| Lrguk         | -2.06211 | 0.00178 | 2.17703 | 1.58707 | 1.81282 | 1.01197 | 1.15917 | 1.12987 |
| Ccdc191       | -2.06213 | 0.01098 | 3.40172 | 3.18709 | 3.12763 | 1.49848 | 1.76759 | 2.175   |
| Prom1         | -2.0664  | 0.00212 | 3.92586 | 4.00841 | 4.11152 | 1.91041 | 2.7473  | 2.46589 |
| Rasef         | -2.07734 | 0.00028 | 1.53304 | 2.11208 | 2.00129 | 1.14619 | 1.10465 | 1.03675 |
| Tmem212       | -2.07816 | 0.0009  | 10.7183 | 14.4354 | 14.9197 | 8.63145 | 10.3239 | 4.44791 |
| Zc2hc1c       | -2.07859 | 0.00045 | 1.16744 | 1.23658 | 1.63173 | 0.7955  | 0.72036 | 0.84214 |
| Tcea3         | -2.07963 | 0.00274 | 6.22911 | 7.16868 | 6.45647 | 3.90502 | 4.43031 | 3.2858  |
| Mmp15         | -2.08127 | 3.1E-05 | 11.7149 | 13.9607 | 17.3725 | 7.95699 | 9.47728 | 7.2996  |
| Gsta4         | -2.08246 | 0.00211 | 9.7127  | 14.6125 | 23.0423 | 10.4517 | 10.9394 | 5.77647 |
| Cry2          | -2.08437 | 0.00014 | 8.25161 | 7.9637  | 7.82726 | 3.97415 | 5.18931 | 4.68448 |
| Abca8a        | -2.08534 | 0.00054 | 6.09007 | 7.36787 | 9.47246 | 5.50786 | 5.17484 | 2.74569 |
| Glul          | -2.0901  | 0.00067 | 27.8445 | 35.7917 | 49.2842 | 23.6529 | 24.0602 | 16.6829 |
| Rgs9          | -2.09318 | 0.00104 | 2.00618 | 1.64093 | 2.17328 | 1.17794 | 1.36954 | 0.83065 |
| Irx2          | -2.10277 | 2.8E-06 | 5.15487 | 4.63255 | 6.68502 | 3.30738 | 3.10658 | 2.98294 |
| Wfdc1         | -2.10524 | 0.00837 | 2.09661 | 2.82262 | 4.05794 | 1.90487 | 1.93228 | 1.07299 |
| Kif9          | -2.10752 | 0.00019 | 1.94787 | 2.17824 | 2.17956 | 1.27199 | 1.48264 | 0.87819 |
| Drc7          | -2.10929 | 0.00409 | 4.34871 | 4.63718 | 4.51018 | 2.65168 | 2.36014 | 2.68431 |
| Pxylp1        | -2.11222 | 0.00046 | 1.67707 | 1.54199 | 1.72898 | 1.00385 | 1.11492 | 0.72052 |
| Bik           | -2.11317 | 0.02484 | 2.58941 | 4.44774 | 4.09559 | 1.59641 | 2.70302 | 2.12639 |
| Enkur         | -2.11386 | 0.02233 | 3.07266 | 4.12628 | 3.36905 | 2.94393 | 1.85061 | 1.28455 |
| Sult5a1       | -2.11401 | 0.02531 | 0.9078  | 0.77964 | 1.11573 | 0.78892 | 0.61527 | 0.53384 |
| Dmd           | -2.11551 | 0.00026 | 1.30073 | 1.83772 | 2.01627 | 1.06193 | 1.12449 | 0.75327 |



|               |          |         |         |         |         |         |         |         |
|---------------|----------|---------|---------|---------|---------|---------|---------|---------|
| Cldn3         | -2.11613 | 6.7E-05 | 18.7715 | 25.0449 | 34.0702 | 17.0548 | 14.577  | 12.1793 |
| Lca5          | -2.11642 | 0.00052 | 2.06057 | 2.37541 | 1.94161 | 1.39467 | 1.30695 | 0.95394 |
| Dnaic2        | -2.12024 | 0.01936 | 2.84456 | 2.88569 | 2.33856 | 1.37026 | 1.674   | 1.5751  |
| Slc4a4        | -2.12412 | 8.8E-05 | 1.42725 | 1.62744 | 1.99829 | 0.88646 | 1.17058 | 0.80707 |
| Mecom         | -2.1272  | 2.1E-06 | 4.24418 | 4.19002 | 4.47286 | 3.00996 | 2.56934 | 2.05095 |
| 4430402l18Rik | -2.12799 | 0.01219 | 1.07803 | 1.03639 | 0.83386 | 0.61398 | 0.56434 | 0.60935 |
| Cfap43        | -2.12821 | 0.01282 | 8.50614 | 7.8997  | 8.4113  | 4.22625 | 4.40401 | 5.1778  |
| Ccdc171       | -2.12907 | 0.00174 | 2.50037 | 2.22231 | 2.43821 | 1.05661 | 1.47297 | 1.51397 |
| Eya1          | -2.13404 | 0.03925 | 0.22338 | 0.27818 | 0.27363 | 0.13192 | 0.16323 | 0.15107 |
| Grlh2         | -2.13479 | 0.00023 | 3.23108 | 3.90399 | 3.6863  | 1.71243 | 2.54617 | 1.82091 |
| Tmem147os     | -2.13732 | 0.0437  | 3.01778 | 2.59176 | 2.55341 | 1.51079 | 2.04012 | 1.58269 |
| Tmem107       | -2.1379  | 0.00297 | 1.91105 | 2.35249 | 2.76112 | 1.4469  | 1.61365 | 0.86159 |
| Dusp18        | -2.13818 | 0.00057 | 3.99137 | 4.46276 | 4.59475 | 2.46318 | 2.93488 | 2.0117  |
| Per3          | -2.13845 | 0.00031 | 10.91   | 9.08925 | 9.921   | 6.91056 | 8.13569 | 4.61593 |
| Foxq1         | -2.13902 | 0.00665 | 1.97228 | 2.65371 | 3.12834 | 1.07515 | 1.44117 | 1.42271 |
| Klf5          | -2.13959 | 0.00208 | 7.49955 | 6.70197 | 9.072   | 4.23554 | 4.39389 | 4.38636 |
| Ccdc181       | -2.14545 | 0.00156 | 9.91307 | 9.6122  | 9.42689 | 6.39171 | 5.47443 | 4.57226 |
| Ccdc157       | -2.14584 | 0.00398 | 6.21017 | 6.84777 | 6.51328 | 3.40235 | 3.89175 | 3.65104 |
| Prdx6         | -2.1463  | 9.5E-05 | 40.0523 | 56.3102 | 83.382  | 39.0658 | 37.865  | 23.4233 |
| Myh14         | -2.14632 | 4.9E-05 | 43.2261 | 48.5958 | 47.9165 | 24.8057 | 24.0771 | 28.0892 |
| Itih2         | -2.14746 | 0.00393 | 0.86813 | 1.0167  | 0.86759 | 0.59753 | 0.5895  | 0.35581 |
| Tox3          | -2.14773 | 0.0188  | 0.93548 | 1.4283  | 1.46913 | 0.84993 | 0.7342  | 0.56234 |
| Rap1gap       | -2.14832 | 0.00185 | 3.33692 | 2.93575 | 3.4127  | 1.72539 | 1.65199 | 1.99981 |
| Epb41l4b      | -2.14941 | 8.4E-06 | 2.00839 | 2.29983 | 2.96855 | 1.58321 | 1.52511 | 0.98537 |
| Tmod1         | -2.15064 | 5.9E-05 | 3.86754 | 2.96094 | 3.56098 | 2.6906  | 2.30391 | 1.91306 |
| Pacrg         | -2.15392 | 0.01782 | 2.10807 | 2.14399 | 2.97956 | 1.36086 | 1.83766 | 0.82536 |
| Acsf2         | -2.1593  | 6.9E-07 | 5.74269 | 5.25935 | 6.00976 | 4.04011 | 3.56496 | 2.40578 |
| Rassf9        | -2.16064 | 3.8E-06 | 8.11138 | 7.46138 | 10.0874 | 5.3869  | 5.33538 | 3.61986 |
| Wdr54         | -2.16195 | 0.03866 | 0.69107 | 0.70765 | 0.73883 | 0.4709  | 0.33665 | 0.44937 |
| Ttc12         | -2.16252 | 0.00043 | 3.31945 | 3.14747 | 2.82047 | 1.91761 | 1.79464 | 1.53117 |
| Armc4         | -2.16358 | 0.00571 | 1.95634 | 1.594   | 1.72524 | 0.7292  | 1.12407 | 1.11947 |
| Calcoco1      | -2.17073 | 3.7E-08 | 11.5529 | 9.69518 | 11.2592 | 6.2778  | 6.49618 | 5.38715 |
| Tnk1          | -2.17304 | 0.0034  | 1.80755 | 1.66487 | 1.72788 | 0.83302 | 1.07195 | 1.02752 |
| Gm4956        | -2.17507 | 0.00208 | 6.96383 | 5.26746 | 9.69223 | 3.07642 | 4.79289 | 4.14776 |
| Slc23a2       | -2.17869 | 2.5E-06 | 18.24   | 21.0909 | 19.6157 | 10.9416 | 12.9515 | 9.04926 |
| Map7          | -2.18246 | 0.01129 | 4.79822 | 4.69321 | 4.88543 | 2.434   | 2.46727 | 2.84829 |
| Mturn         | -2.18369 | 0.00029 | 2.5879  | 2.9722  | 3.46296 | 1.50256 | 2.05885 | 1.34625 |
| Lamc3         | -2.18683 | 0.00051 | 2.51987 | 3.09866 | 3.58859 | 2.2504  | 1.82735 | 1.00698 |
| Rsph1         | -2.18736 | 0.00179 | 10.339  | 12.3541 | 11.7189 | 8.10021 | 6.27748 | 4.76266 |
| Foxj1         | -2.18879 | 0.00721 | 27.562  | 31.7804 | 32.4558 | 14.5294 | 15.5159 | 19.1565 |
| Naaladl2      | -2.18893 | 0.00036 | 0.75388 | 0.67624 | 0.85244 | 0.44902 | 0.45702 | 0.33989 |
| Rab6b         | -2.19116 | 0.00037 | 2.73878 | 3.98973 | 5.27568 | 2.75604 | 2.31369 | 1.50048 |
| Wnt11         | -2.19261 | 0.00478 | 2.33987 | 2.57078 | 2.34383 | 1.11082 | 1.17065 | 1.65366 |
| Strbp         | -2.19396 | 3.1E-06 | 2.74515 | 2.86857 | 3.03691 | 1.81737 | 1.79368 | 1.22919 |
| Tyro3         | -2.19684 | 0.00095 | 1.95577 | 2.38055 | 2.43948 | 1.38062 | 1.12409 | 1.19893 |
| Traf3ip1      | -2.19693 | 0.00698 | 16.6333 | 16.5652 | 15.6731 | 7.98299 | 8.58347 | 9.88228 |
| Ccdc65        | -2.19862 | 0.00248 | 1.79952 | 2.81358 | 3.08693 | 1.80264 | 1.21378 | 1.18576 |
| Tcte1         | -2.20073 | 0.00269 | 2.95042 | 2.82629 | 3.42166 | 1.72692 | 1.63075 | 1.5732  |
| Megf6         | -2.21034 | 0.00019 | 9.73156 | 9.52729 | 10.6094 | 5.00923 | 6.20221 | 5.04631 |
| Tnfaip8l3     | -2.21212 | 0.04261 | 0.32334 | 0.35937 | 0.41221 | 0.29377 | 0.20384 | 0.07718 |
| Fam198a       | -2.21222 | 0.00192 | 1.41929 | 1.97351 | 2.22893 | 1.28949 | 1.05356 | 0.67035 |
| Mfsd6l        | -2.21279 | 0.00514 | 1.27001 | 1.30887 | 1.39615 | 0.84617 | 0.98988 | 0.28629 |
| Col8a2        | -2.21299 | 0.0038  | 2.99175 | 4.02096 | 3.36821 | 1.65913 | 1.72239 | 2.20716 |
| Nectin4       | -2.21384 | 1.8E-05 | 2.86346 | 2.95908 | 3.15882 | 1.58634 | 1.79184 | 1.54288 |
| Wnk4          | -2.21398 | 0.00656 | 1.80807 | 2.00423 | 2.04046 | 1.08878 | 0.9832  | 1.08056 |
| Cyb5a         | -2.21597 | 0.00019 | 13.0628 | 15.7972 | 24.8092 | 13.0513 | 9.07931 | 6.82503 |

|               |          |         |         |         |         |         |         |         |
|---------------|----------|---------|---------|---------|---------|---------|---------|---------|
| 1700016K19Rik | -2.21786 | 0.01274 | 7.38566 | 6.42436 | 8.92217 | 3.95731 | 4.24363 | 4.09822 |
| Erich3        | -2.22025 | 0.04782 | 3.3373  | 3.45947 | 3.27299 | 1.45859 | 1.88642 | 2.01346 |
| Olfml2a       | -2.22219 | 3.6E-06 | 3.59522 | 3.93345 | 4.53654 | 2.64155 | 2.57377 | 1.39538 |
| lyd           | -2.22787 | 0.00991 | 1.23584 | 1.33826 | 1.72144 | 0.92755 | 0.73291 | 0.65408 |
| Shh           | -2.23368 | 0.005   | 3.33882 | 3.57778 | 3.95424 | 2.08726 | 1.99953 | 1.3672  |
| Abca6         | -2.2354  | 0.00849 | 0.88855 | 0.666   | 0.91337 | 0.57245 | 0.4722  | 0.28406 |
| Pih1d2        | -2.23638 | 0.003   | 1.70509 | 1.67739 | 1.81114 | 0.92949 | 0.87593 | 1.00634 |
| Spag16        | -2.24068 | 8.4E-05 | 2.06286 | 2.31422 | 2.1503  | 1.25338 | 1.39431 | 0.90679 |
| Adamdec1      | -2.24105 | 0.02548 | 1.5104  | 2.1002  | 1.86372 | 0.52277 | 1.33141 | 1.11872 |
| Pcolce2       | -2.24177 | 0.04291 | 3.97855 | 6.41278 | 9.16787 | 4.5398  | 3.94972 | 1.98924 |
| Col4a6        | -2.24224 | 2.9E-06 | 2.53758 | 2.74299 | 2.92703 | 1.46082 | 1.59849 | 1.36104 |
| Dzank1        | -2.24232 | 0.00255 | 1.5094  | 1.99434 | 1.63113 | 0.63294 | 0.91526 | 0.65672 |
| Unc79         | -2.24237 | 0.0073  | 0.62514 | 0.66366 | 0.68723 | 0.29188 | 0.47372 | 0.30533 |
| Efcab6        | -2.24327 | 0.02509 | 1.53784 | 1.39087 | 1.25671 | 0.56877 | 0.5834  | 1.0676  |
| Usp2          | -2.24595 | 0.01177 | 2.73316 | 3.09349 | 3.15526 | 1.46361 | 1.39316 | 1.34648 |
| Acss2         | -2.24623 | 0.00059 | 1.67327 | 1.73184 | 2.13458 | 0.86537 | 0.99487 | 0.80081 |
| Nrxn2         | -2.24654 | 0.00227 | 0.33464 | 0.42838 | 0.32722 | 0.22372 | 0.15379 | 0.16226 |
| Kcna2         | -2.24756 | 0.01053 | 0.29299 | 0.42777 | 0.49003 | 0.25954 | 0.25691 | 0.12879 |
| Ppl           | -2.25238 | 0.00039 | 9.53073 | 10.8342 | 12.5806 | 5.68019 | 5.10304 | 6.38898 |
| Rab36         | -2.25469 | 0.01627 | 2.47147 | 2.32877 | 2.56833 | 1.14197 | 1.34843 | 1.41351 |
| Ehf           | -2.25788 | 1.1E-06 | 2.28341 | 2.43119 | 3.22739 | 1.59147 | 1.24948 | 1.37498 |
| Otud1         | -2.26645 | 1.8E-05 | 4.06476 | 4.78683 | 5.80319 | 2.54595 | 2.76016 | 2.45733 |
| Agbl2         | -2.26667 | 0.00013 | 1.2196  | 1.43036 | 1.37161 | 0.83402 | 0.81771 | 0.49664 |
| Ccdc189       | -2.27273 | 0.03018 | 1.83273 | 2.27357 | 2.4225  | 0.90194 | 1.2648  | 1.61814 |
| Aldh1a1       | -2.27395 | 0.00152 | 75.7385 | 122.25  | 180.277 | 79.8884 | 80.4539 | 40.1599 |
| Lrrc10b       | -2.27566 | 0.0188  | 6.38207 | 6.85141 | 5.49932 | 2.63218 | 3.31351 | 3.91848 |
| Iqck          | -2.28043 | 0.00042 | 0.58383 | 0.68798 | 0.58851 | 0.3454  | 0.34393 | 0.22037 |
| Slc44a4       | -2.28058 | 0.00111 | 2.15777 | 2.71958 | 2.93099 | 1.14571 | 1.50163 | 1.47819 |
| Usp43         | -2.28533 | 0.00021 | 1.89302 | 2.46236 | 2.16473 | 1.11877 | 1.28925 | 1.14347 |
| Sox6          | -2.28879 | 0.00044 | 0.45743 | 0.5084  | 0.68457 | 0.31781 | 0.30148 | 0.24566 |
| Fam161b       | -2.29349 | 0.0044  | 1.70444 | 1.75338 | 1.39426 | 0.79981 | 0.89418 | 0.88667 |
| Ddo           | -2.29358 | 0.0009  | 2.45256 | 2.03081 | 1.97952 | 1.05643 | 1.1995  | 1.163   |
| Maats1        | -2.29578 | 0.00013 | 2.15422 | 2.41176 | 2.37422 | 1.39801 | 1.19933 | 1.0406  |
| Sec14l3       | -2.29791 | 1.3E-05 | 174.572 | 190.766 | 224.943 | 115.262 | 116.064 | 80.2022 |
| Magix         | -2.29875 | 0.00254 | 1.01892 | 1.33836 | 1.24248 | 0.81683 | 0.72994 | 0.32427 |
| Tsga10        | -2.29946 | 0.00025 | 1.84852 | 1.69294 | 1.48747 | 0.88432 | 1.10768 | 0.70802 |
| Mgst1         | -2.30126 | 8E-06   | 26.6865 | 32.1836 | 44.3727 | 21.0971 | 21.2729 | 11.9534 |
| Ttc29         | -2.30153 | 0.01045 | 2.21652 | 2.4747  | 2.18138 | 1.07403 | 1.27171 | 1.26579 |
| Thbs3         | -2.30456 | 5.1E-07 | 5.78612 | 6.00975 | 6.40621 | 3.15418 | 3.98135 | 2.76354 |
| Myom3         | -2.30491 | 0.0114  | 0.34664 | 0.42174 | 0.38106 | 0.24932 | 0.21108 | 0.13674 |
| Wdr63         | -2.30622 | 0.00104 | 4.60928 | 3.91336 | 3.87165 | 2.29728 | 2.1299  | 2.10183 |
| Fkbp4         | -2.30678 | 7.2E-05 | 12.2309 | 19.4544 | 23.9317 | 9.72332 | 10.1836 | 8.60901 |
| C530008M17Rik | -2.31221 | 0.01313 | 0.18873 | 0.25285 | 0.3201  | 0.14403 | 0.11032 | 0.16337 |
| Cyp1b1        | -2.31412 | 0.00029 | 1.36049 | 1.25607 | 1.81076 | 1.06611 | 0.69589 | 0.52904 |
| Eno4          | -2.31469 | 0.0001  | 3.42722 | 3.73026 | 4.02873 | 1.57231 | 2.21504 | 2.0653  |
| Lekr1         | -2.31605 | 0.01082 | 0.74564 | 0.70999 | 0.51931 | 0.324   | 0.41061 | 0.35079 |
| Gpr179        | -2.31952 | 0.01541 | 0.28332 | 0.19623 | 0.24974 | 0.11625 | 0.14247 | 0.12361 |
| A530020G20Rik | -2.31962 | 0.00265 | 2.7274  | 3.13641 | 2.87487 | 1.65899 | 1.44123 | 1.34427 |
| Nr3c2         | -2.32181 | 3.8E-06 | 1.96668 | 1.90886 | 2.4624  | 1.06475 | 1.41739 | 0.74699 |
| Hmgcs2        | -2.32191 | 0.00482 | 1.5374  | 1.93502 | 2.52264 | 1.20414 | 1.21378 | 0.68118 |
| Aox1          | -2.32242 | 0.00022 | 5.77035 | 6.19686 | 6.25046 | 3.1547  | 3.44162 | 2.87754 |
| Gm15411       | -2.32249 | 0.02315 | 0.47504 | 0.77302 | 0.68321 | 0.40888 | 0.34103 | 0.30435 |
| Jdp2          | -2.32463 | 0.00012 | 4.17261 | 5.017   | 6.24709 | 2.86433 | 2.39401 | 2.6964  |
| Enah          | -2.32477 | 2.7E-06 | 4.33496 | 5.12595 | 5.92941 | 2.44858 | 2.5762  | 2.78545 |
| Rph3al        | -2.32488 | 4.9E-05 | 1.60056 | 2.10119 | 2.49924 | 1.1218  | 1.0693  | 1.02056 |
| Ccdc85c       | -2.32612 | 0.00098 | 4.39702 | 3.53423 | 4.56813 | 1.79259 | 2.36166 | 2.36361 |

|               |          |         |         |         |         |         |         |         |
|---------------|----------|---------|---------|---------|---------|---------|---------|---------|
| Mdm1          | -2.32692 | 0.00049 | 2.46474 | 2.90168 | 2.84436 | 1.50967 | 1.21417 | 1.53573 |
| Pcyt1b        | -2.33043 | 0.03279 | 0.56977 | 0.46138 | 0.55222 | 0.35497 | 0.28549 | 0.17615 |
| Kif6          | -2.33346 | 0.00579 | 1.55132 | 1.34478 | 1.66669 | 0.59276 | 0.84753 | 0.90204 |
| Per2          | -2.33746 | 3E-05   | 16.545  | 14.2861 | 17.0072 | 6.53504 | 8.85051 | 8.90279 |
| Plekhd1       | -2.33824 | 0.0039  | 4.5386  | 4.22114 | 4.46435 | 2.25286 | 2.35115 | 2.2159  |
| Dpm1          | -2.33899 | 0.04075 | 1.14119 | 1.49013 | 1.48129 | 1.39654 | 1.56565 | 1.134   |
| Cdkl4         | -2.33902 | 0.00089 | 2.1125  | 2.32535 | 1.90644 | 0.91911 | 1.27549 | 1.1268  |
| Slc9a2        | -2.34141 | 0.03616 | 0.16233 | 0.2681  | 0.35298 | 0.11345 | 0.15815 | 0.13511 |
| Gm26671       | -2.34268 | 0.01896 | 1.6802  | 1.30336 | 1.53213 | 0.88638 | 0.8449  | 0.58646 |
| Lrrc45        | -2.34387 | 0.01237 | 15.3865 | 13.783  | 11.6036 | 6.03927 | 6.45042 | 8.23836 |
| Ccdc81        | -2.34395 | 0.02132 | 1.06274 | 2.25495 | 1.41373 | 0.65317 | 0.79179 | 1.01464 |
| Hspa2         | -2.34426 | 1E-06   | 4.01432 | 5.55781 | 5.83691 | 2.86117 | 3.30419 | 1.77864 |
| Slc16a7       | -2.3454  | 0.00011 | 1.42166 | 2.21419 | 2.10309 | 1.1578  | 1.28463 | 0.55793 |
| Ppargc1a      | -2.34835 | 0.00598 | 0.59532 | 0.74988 | 0.84766 | 0.3726  | 0.41245 | 0.33997 |
| Ppp2r2c       | -2.35295 | 0.02731 | 0.19597 | 0.42077 | 0.68324 | 0.28488 | 0.22912 | 0.13253 |
| Cfap54        | -2.35448 | 0.00172 | 3.97    | 3.82801 | 3.69547 | 1.86905 | 1.89293 | 2.07461 |
| Arhgdig       | -2.35515 | 0.00135 | 3.40571 | 3.75405 | 3.15856 | 1.53494 | 1.61987 | 1.88607 |
| Rassf10       | -2.35572 | 0.0172  | 0.89802 | 1.04975 | 1.03422 | 0.45327 | 0.38886 | 0.70852 |
| Plin5         | -2.35574 | 0.01852 | 1.2118  | 1.72259 | 1.22059 | 0.53151 | 0.85494 | 0.79124 |
| Fign          | -2.35583 | 3.9E-06 | 0.75232 | 0.80389 | 0.94793 | 0.52456 | 0.46876 | 0.28396 |
| Dync2h1       | -2.3563  | 1.1E-06 | 4.35825 | 4.531   | 4.67465 | 2.42815 | 2.54146 | 2.00579 |
| MacroD1       | -2.35744 | 0.00493 | 1.77975 | 2.5867  | 3.09601 | 0.87068 | 1.5339  | 1.48134 |
| Gm10044       | -2.36157 | 0.00422 | 1.09258 | 1.16582 | 1.21669 | 0.63169 | 0.77417 | 0.44781 |
| Cacnb1        | -2.36843 | 0.00027 | 2.17586 | 1.78601 | 2.28612 | 1.04967 | 0.95677 | 1.17197 |
| Scube3        | -2.36871 | 2.7E-05 | 1.07751 | 1.61728 | 1.80288 | 0.80513 | 0.89282 | 0.58567 |
| Tmem232       | -2.369   | 0.03674 | 2.02277 | 2.04544 | 1.99823 | 0.74104 | 1.20788 | 1.14731 |
| Vwa3b         | -2.37016 | 0.02365 | 1.40866 | 1.47402 | 0.99169 | 0.55901 | 0.78876 | 0.65699 |
| Wdr78         | -2.37087 | 1.1E-05 | 3.42529 | 3.5055  | 3.57617 | 1.68072 | 1.72093 | 1.92093 |
| Mok           | -2.37098 | 0.00259 | 2.12577 | 2.2436  | 2.24438 | 1.02385 | 1.17279 | 1.17779 |
| Kyat1         | -2.37161 | 1.5E-05 | 1.73043 | 2.15235 | 2.10845 | 1.11137 | 0.95923 | 1.00883 |
| D830026I12Rik | -2.37384 | 0.00522 | 1.23874 | 1.1348  | 1.24505 | 0.67528 | 0.80459 | 0.33509 |
| Cyp39a1       | -2.37408 | 0.00016 | 2.99928 | 2.79667 | 4.01042 | 1.79071 | 2.44904 | 0.77269 |
| Mdh1b         | -2.37444 | 0.01839 | 1.11609 | 1.65566 | 1.43409 | 0.5531  | 0.98854 | 0.61755 |
| Agmo          | -2.37686 | 2.5E-05 | 1.04066 | 1.13209 | 1.37282 | 0.69336 | 0.7976  | 0.30028 |
| Nme9          | -2.37719 | 0.02574 | 5.56198 | 5.81328 | 4.35093 | 2.38364 | 2.81171 | 2.83879 |
| 1810019D21Rik | -2.38069 | 0.00712 | 4.55436 | 4.00801 | 4.76827 | 3.21833 | 1.86254 | 2.35752 |
| Adcyap1r1     | -2.3819  | 0.00785 | 0.33028 | 0.40847 | 0.39836 | 0.16804 | 0.20594 | 0.21443 |
| Ankrd42       | -2.38226 | 0.01251 | 3.35217 | 3.15803 | 2.85245 | 1.72481 | 1.61632 | 1.5036  |
| Smim5         | -2.3828  | 0.01713 | 2.8558  | 3.36104 | 4.28557 | 2.25829 | 2.42168 | 1.7167  |
| Snhg11        | -2.38296 | 6.7E-08 | 1.96501 | 1.94251 | 2.26625 | 1.08792 | 1.18658 | 0.85823 |
| Spata24       | -2.38639 | 0.04977 | 3.06624 | 4.18244 | 4.07892 | 2.70389 | 1.66942 | 1.34175 |
| Fsd2          | -2.38857 | 0.02275 | 1.00666 | 1.10888 | 1.27848 | 0.43742 | 0.74624 | 0.53278 |
| 1700040L02Rik | -2.38973 | 0.01481 | 2.4877  | 1.48369 | 2.14875 | 1.06731 | 1.00988 | 1.02811 |
| Cfap77        | -2.39048 | 0.00093 | 1.89437 | 2.39761 | 2.44265 | 1.238   | 1.1333  | 1.03388 |
| 4930412C18Rik | -2.39116 | 0.01868 | 0.45391 | 0.32892 | 0.37424 | 0.2062  | 0.2073  | 0.17267 |
| Spata18       | -2.39309 | 4E-05   | 14.1138 | 15.996  | 15.171  | 7.97211 | 8.30696 | 6.66173 |
| Dnah7a        | -2.39559 | 0.03446 | 1.56423 | 1.56634 | 1.55117 | 0.70749 | 0.81191 | 0.81302 |
| Aldh1a7       | -2.39712 | 0.00711 | 10.0462 | 14.6458 | 24.5406 | 11.812  | 9.70558 | 3.42551 |
| Frem2         | -2.40849 | 0.02028 | 0.44739 | 0.50854 | 0.52695 | 0.20324 | 0.26922 | 0.26696 |
| Htr1b         | -2.41077 | 0.00514 | 0.73842 | 0.68174 | 0.74798 | 0.31867 | 0.35972 | 0.07491 |
| Tmem139       | -2.41138 | 0.02548 | 1.14047 | 1.82834 | 1.7194  | 0.89801 | 0.74076 | 0.71985 |
| Fam187b       | -2.41877 | 0.0051  | 0.60962 | 0.90934 | 1.14885 | 0.46642 | 0.43764 | 0.43397 |
| Fgfr3         | -2.42317 | 2.1E-05 | 11.8299 | 12.6711 | 15.7734 | 6.20974 | 7.03886 | 6.36063 |
| Wdr60         | -2.42581 | 0.01081 | 6.74249 | 5.5695  | 5.31644 | 2.61626 | 2.4406  | 3.57814 |
| Syt10         | -2.42652 | 0.0076  | 0.99261 | 1.13664 | 2.04876 | 0.773   | 0.64472 | 0.63931 |
| Ascc2         | -2.43166 | 1.8E-06 | 14.599  | 15.8575 | 16.4711 | 7.82108 | 8.52388 | 6.93834 |



|               |          |         |         |         |         |         |         |         |
|---------------|----------|---------|---------|---------|---------|---------|---------|---------|
| Map3k19       | -2.43195 | 0.002   | 3.00038 | 3.17502 | 2.50744 | 1.34677 | 1.42681 | 1.54596 |
| B330016D10Rik | -2.43266 | 0.00595 | 1.9482  | 1.49705 | 1.59419 | 1.11792 | 0.74925 | 0.62408 |
| Ltbp4         | -2.43305 | 0.00026 | 38.7394 | 55.4859 | 68.4289 | 25.6711 | 30.3155 | 23.3422 |
| Gm9899        | -2.43399 | 0.02293 | 0.34355 | 0.41928 | 0.44298 | 0.19714 | 0.26425 | 0.14674 |
| Saxo2         | -2.43485 | 0.00025 | 2.07811 | 1.98827 | 1.94096 | 1.0434  | 1.36754 | 0.61639 |
| Armc2         | -2.43495 | 0.0135  | 1.39522 | 1.28162 | 1.31468 | 0.65035 | 0.59102 | 0.72202 |
| Fam227a       | -2.43655 | 0.00256 | 1.767   | 1.48333 | 1.38958 | 0.72424 | 0.81548 | 0.77269 |
| Tnxb          | -2.43708 | 5.5E-06 | 12.2715 | 14.1953 | 17.3581 | 6.49615 | 7.95437 | 6.9463  |
| Ngef          | -2.43775 | 8.2E-06 | 3.64016 | 3.85512 | 3.85088 | 1.8261  | 1.9147  | 1.6915  |
| Fam167a       | -2.44397 | 0.00046 | 5.63156 | 6.13333 | 7.22909 | 3.13296 | 3.33975 | 2.84255 |
| 4933408B17Rik | -2.44597 | 0.04236 | 0.78824 | 0.70773 | 0.54017 | 0.22787 | 0.41889 | 0.38768 |
| Ccdc121       | -2.44602 | 0.04178 | 1.10268 | 2.38813 | 2.03287 | 0.82761 | 0.79406 | 1.1672  |
| Homer2        | -2.4472  | 0.00124 | 0.42149 | 0.59343 | 0.86594 | 0.27622 | 0.28948 | 0.34579 |
| Nek10         | -2.44925 | 0.02848 | 1.02202 | 0.91705 | 0.84804 | 0.37419 | 0.40127 | 0.59832 |
| Fsd1l         | -2.4519  | 2.4E-06 | 1.78194 | 2.02257 | 1.8647  | 1.10644 | 1.17777 | 0.55712 |
| Dnah5         | -2.45472 | 0.00059 | 9.55211 | 10.0869 | 9.91021 | 4.0706  | 5.11529 | 5.12408 |
| Crnde         | -2.45499 | 0.00094 | 1.72945 | 1.85664 | 1.9148  | 0.6678  | 1.09523 | 0.99414 |
| Akr1c14       | -2.45767 | 0.00091 | 4.57598 | 5.34077 | 7.32456 | 3.35798 | 3.34372 | 1.78535 |
| 1700001C02Rik | -2.46158 | 0.02169 | 1.84833 | 1.87602 | 2.05829 | 1.22131 | 0.9004  | 0.6818  |
| Gm20219       | -2.46595 | 0.0395  | 2.19909 | 1.65257 | 2.59017 | 0.6868  | 1.27213 | 1.20833 |
| Tst           | -2.46845 | 0.00021 | 8.83216 | 12.3006 | 18.0691 | 6.72318 | 8.83759 | 3.55147 |
| Fam46c        | -2.4743  | 3.8E-06 | 6.45082 | 7.78817 | 9.15132 | 3.80762 | 4.84956 | 2.80515 |
| Lrrc48        | -2.47627 | 0.0004  | 4.32275 | 4.24288 | 3.855   | 1.85851 | 2.2186  | 1.9837  |
| Bmx           | -2.47661 | 0.00041 | 1.77687 | 1.45336 | 1.91348 | 1.23    | 0.68697 | 0.57221 |
| Rims2         | -2.47967 | 0.02706 | 0.25924 | 0.43044 | 0.45598 | 0.17272 | 0.20206 | 0.187   |
| Ccser1        | -2.48299 | 0.0002  | 2.05537 | 2.21042 | 1.86816 | 1.03285 | 1.04556 | 0.91026 |
| March4        | -2.49029 | 0.0012  | 1.87708 | 1.82595 | 1.9853  | 0.7657  | 1.06369 | 0.93263 |
| Gstm1         | -2.49401 | 0.00037 | 29.1876 | 35.084  | 63.5964 | 23.8826 | 23.7071 | 13.7731 |
| 1700088E04Rik | -2.49898 | 0.00015 | 1.54904 | 1.59927 | 1.64595 | 0.98816 | 0.8991  | 0.69095 |
| Stmnd1        | -2.50108 | 0.02276 | 2.81521 | 3.46184 | 3.73789 | 1.16262 | 1.74543 | 1.90385 |
| Spag6l        | -2.50114 | 1.8E-05 | 2.62063 | 3.15424 | 3.65895 | 1.58152 | 1.80776 | 1.16425 |
| Dnaja4        | -2.5056  | 0.00016 | 6.00175 | 7.22047 | 7.67011 | 2.95824 | 3.64575 | 4.2067  |
| Catip         | -2.50608 | 0.03684 | 5.0881  | 3.69233 | 4.57137 | 1.57676 | 1.4987  | 3.14752 |
| Cfap70        | -2.50668 | 0.00096 | 2.44545 | 2.46473 | 2.78037 | 1.2119  | 1.12236 | 1.33943 |
| Syde2         | -2.51212 | 1.7E-07 | 2.22909 | 2.4093  | 3.25778 | 1.35016 | 1.31488 | 1.12804 |
| Cfap206       | -2.51306 | 4.5E-06 | 4.91508 | 5.15593 | 6.18615 | 2.61556 | 2.59957 | 2.56417 |
| D130043K22Rik | -2.51448 | 0.00058 | 0.77687 | 0.76657 | 0.90334 | 0.52561 | 0.43481 | 0.20121 |
| Esrrg         | -2.51521 | 0.01064 | 0.47762 | 0.36194 | 0.29121 | 0.12763 | 0.2053  | 0.228   |
| Ppp2r2b       | -2.51612 | 0.01066 | 0.50333 | 0.75179 | 0.7011  | 0.31812 | 0.27718 | 0.35519 |
| Cetn4         | -2.52387 | 0.0064  | 1.31936 | 1.17026 | 1.18206 | 0.66813 | 0.84291 | 0.61433 |
| Rgs11         | -2.52512 | 0.01188 | 3.81507 | 3.70388 | 3.51669 | 1.46936 | 1.77768 | 2.32763 |
| Dnah7c        | -2.52613 | 0.01176 | 1.88905 | 1.86009 | 1.71479 | 0.92416 | 0.82922 | 0.9359  |
| Dnah11        | -2.52628 | 0.00019 | 4.68067 | 4.61564 | 4.1547  | 1.79202 | 2.35655 | 2.27615 |
| Cdkn1c        | -2.52696 | 0.00027 | 5.47453 | 6.28118 | 7.93925 | 3.34182 | 2.6252  | 3.06594 |
| Ptgfr         | -2.53184 | 0.03026 | 0.74624 | 0.67405 | 1.11536 | 0.36238 | 0.63931 | 0.19142 |
| Ccdc160       | -2.53757 | 0.01323 | 1.13552 | 1.02398 | 0.90947 | 0.619   | 0.44253 | 0.38396 |
| Ankrd45       | -2.53778 | 0.00249 | 1.14409 | 1.46384 | 1.05604 | 0.50912 | 0.6597  | 0.56844 |
| Ccdc153       | -2.54045 | 0.00196 | 15.634  | 16.8481 | 16.023  | 7.1994  | 7.92895 | 7.82097 |
| Mtus2         | -2.54096 | 0.00012 | 1.10935 | 1.39888 | 1.32738 | 0.58394 | 0.60046 | 0.63114 |
| Nphp4         | -2.54101 | 0.00105 | 1.01002 | 1.02853 | 1.14205 | 0.40639 | 0.56231 | 0.54643 |
| Ggnbp1        | -2.54119 | 0.00737 | 0.76619 | 0.62567 | 1.08886 | 0.45647 | 0.47726 | 0.56062 |
| Syngap1       | -2.5413  | 0.00621 | 7.07992 | 5.81561 | 5.30306 | 2.3465  | 2.8042  | 3.38892 |
| Pitpnm3       | -2.54276 | 8.7E-05 | 4.06939 | 4.23512 | 4.01866 | 1.97778 | 2.20744 | 1.70649 |
| Nthl1         | -2.54416 | 0.02495 | 2.66468 | 1.45632 | 2.2065  | 0.807   | 0.94405 | 1.31058 |
| Grb7          | -2.54426 | 2.7E-08 | 2.69527 | 3.27186 | 3.36996 | 1.67177 | 1.43923 | 1.332   |
| Ccdc173       | -2.54595 | 0.02446 | 2.18189 | 1.87388 | 1.4777  | 0.68143 | 0.8636  | 1.10666 |

|               |          |         |         |         |         |         |         |         |
|---------------|----------|---------|---------|---------|---------|---------|---------|---------|
| Tekt4         | -2.54919 | 0.00129 | 3.92776 | 2.73774 | 3.48646 | 2.12045 | 1.3865  | 1.30887 |
| Gfra1         | -2.55025 | 0.00047 | 2.70732 | 3.24151 | 3.64647 | 1.47584 | 1.76881 | 1.33547 |
| Rsph4a        | -2.55189 | 8.3E-06 | 5.66252 | 6.03277 | 5.47071 | 3.27783 | 2.88648 | 2.0682  |
| Ift81         | -2.55358 | 2.6E-05 | 6.25593 | 6.59779 | 6.72005 | 3.1602  | 3.46198 | 2.6738  |
| Hspa4l        | -2.55383 | 2.7E-08 | 5.56141 | 7.17718 | 7.2473  | 3.51412 | 3.30003 | 2.63071 |
| Zdhhc1        | -2.55548 | 5.8E-05 | 13.0016 | 12.1958 | 12.1147 | 5.38982 | 5.73951 | 6.31835 |
| Wdr72         | -2.5584  | 0.02913 | 0.45433 | 0.46023 | 0.4281  | 0.17993 | 0.23835 | 0.22059 |
| Dapk2         | -2.5595  | 5.2E-06 | 5.09042 | 5.26751 | 6.08344 | 3.04566 | 2.75797 | 1.98154 |
| Ptpn13        | -2.56546 | 1.1E-09 | 7.96989 | 8.25584 | 8.82028 | 4.17701 | 4.41604 | 3.23583 |
| Vtcn1         | -2.56593 | 0.04911 | 0.76498 | 1.02833 | 1.81771 | 0.36262 | 0.81012 | 0.49484 |
| Adgb          | -2.56804 | 0.00017 | 2.8872  | 2.85459 | 3.2779  | 1.36916 | 1.59172 | 1.27629 |
| Frmpd2        | -2.57082 | 0.01129 | 3.12907 | 2.78041 | 2.62934 | 1.11993 | 1.24056 | 1.59394 |
| Plin4         | -2.57097 | 0.03379 | 1.49447 | 2.51514 | 3.15777 | 1.11093 | 1.27955 | 0.91879 |
| Fmo2          | -2.5712  | 1.4E-05 | 42.6943 | 50.5676 | 73.9837 | 26.5285 | 33.068  | 18.7579 |
| Lrrc46        | -2.57199 | 0.01106 | 1.37078 | 2.01817 | 1.96822 | 0.88958 | 0.76316 | 0.88287 |
| Rorc          | -2.5746  | 0.00021 | 2.35233 | 2.73576 | 2.63213 | 1.29123 | 1.71887 | 0.69598 |
| 1700003E16Rik | -2.57638 | 0.03279 | 2.86635 | 3.27104 | 2.2569  | 1.14157 | 1.26242 | 1.54012 |
| Morn3         | -2.58556 | 0.03127 | 3.09384 | 2.82316 | 2.6723  | 1.17121 | 1.50714 | 1.74356 |
| Dlec1         | -2.58807 | 0.00884 | 3.55551 | 3.54574 | 3.08027 | 1.05312 | 1.57342 | 1.97291 |
| Wdr31         | -2.58846 | 0.00224 | 1.32523 | 1.644   | 1.12732 | 0.60202 | 0.8249  | 0.74685 |
| Ccdc96        | -2.58904 | 0.00169 | 1.72712 | 2.02649 | 1.67326 | 0.77354 | 0.8532  | 0.92124 |
| Arhgef38      | -2.59134 | 6.9E-09 | 2.1722  | 2.48741 | 2.55851 | 1.08352 | 1.29678 | 0.99373 |
| Gsn           | -2.59318 | 0.00063 | 111.24  | 174.182 | 224.031 | 93.8891 | 88.1407 | 54.4738 |
| Myo5c         | -2.59969 | 4.2E-05 | 11.9161 | 11.74   | 13.1772 | 5.87481 | 5.74786 | 5.36421 |
| Znrd1as       | -2.60129 | 0.01611 | 0.76364 | 0.83073 | 0.86347 | 0.74006 | 0.1984  | 0.13771 |
| 1700013F07Rik | -2.60261 | 0.0051  | 1.68169 | 1.28954 | 1.30164 | 0.54568 | 0.87774 | 0.56864 |
| BC039771      | -2.60548 | 6.1E-05 | 1.40628 | 1.90698 | 1.86559 | 0.97506 | 0.9735  | 0.45048 |
| Ccdc40        | -2.6058  | 0.00032 | 4.72838 | 5.01712 | 4.91868 | 2.22024 | 2.04276 | 2.4447  |
| Efcab2        | -2.60705 | 0.00123 | 1.32356 | 1.38931 | 1.40552 | 0.43901 | 0.7164  | 0.76721 |
| Lrrc6         | -2.60859 | 0.00214 | 2.55262 | 3.19856 | 2.64185 | 1.29266 | 1.67157 | 0.96218 |
| Tmem88b       | -2.60873 | 0.02792 | 0.45224 | 0.43156 | 0.40246 | 0.22827 | 0.19583 | 0.16991 |
| Ccdc113       | -2.60893 | 5.1E-07 | 4.80725 | 6.86165 | 6.6989  | 3.1373  | 3.16639 | 2.19786 |
| Dnah6         | -2.61079 | 0.00017 | 11.6852 | 12.6138 | 13.5291 | 5.35911 | 5.8623  | 5.90338 |
| Rnf32         | -2.61296 | 0.00059 | 0.8915  | 0.90237 | 0.96004 | 0.52069 | 0.43429 | 0.30145 |
| Selenbp1      | -2.62283 | 0.00011 | 71.2854 | 82.1129 | 123.025 | 52.0082 | 42.6133 | 29.0599 |
| P4htm         | -2.62304 | 0.003   | 1.32269 | 1.00119 | 1.3097  | 0.67215 | 0.54605 | 0.45483 |
| Lhfpl4        | -2.62333 | 0.01427 | 0.34505 | 0.48961 | 0.3534  | 0.1363  | 0.23386 | 0.18262 |
| Cyp4b1        | -2.62393 | 1.2E-05 | 37.6121 | 45.8477 | 59.2623 | 24.6196 | 23.0867 | 17.4627 |
| Cntfr         | -2.6256  | 0.0012  | 1.53601 | 1.37302 | 1.6541  | 0.45569 | 0.82461 | 0.84796 |
| Rhov          | -2.62655 | 0.04456 | 0.66571 | 1.18744 | 0.67553 | 0.3722  | 0.34924 | 0.48483 |
| Dnah9         | -2.62673 | 0.00078 | 6.38651 | 6.33962 | 5.99722 | 2.59819 | 2.6743  | 3.15791 |
| Fank1         | -2.637   | 0.00011 | 2.57943 | 2.47592 | 2.39478 | 1.20623 | 1.10872 | 1.12873 |
| Ttc21a        | -2.64142 | 0.00486 | 14.2756 | 11.5931 | 11.7129 | 4.23513 | 5.12502 | 6.67693 |
| Gabrp         | -2.64247 | 0.00084 | 8.44444 | 10.5791 | 14.3566 | 6.31137 | 6.28997 | 2.82917 |
| Cys1          | -2.64498 | 2E-05   | 4.21866 | 4.33076 | 4.81362 | 1.73676 | 2.11931 | 2.22887 |
| Dnah3         | -2.64586 | 0.01747 | 9.68093 | 9.16248 | 8.34657 | 3.11833 | 4.15767 | 5.16993 |
| Mycbpap       | -2.64878 | 0.00037 | 3.35674 | 3.85028 | 3.41769 | 1.37137 | 1.58033 | 1.85871 |
| Dnah12        | -2.65305 | 0.00991 | 10.5463 | 9.20601 | 8.07144 | 3.80561 | 4.16517 | 4.60243 |
| Por           | -2.65395 | 6.6E-08 | 27.9776 | 31.5903 | 37.7658 | 15.4484 | 16.9676 | 11.8509 |
| Ulk4          | -2.65433 | 0.0025  | 3.1076  | 3.25906 | 2.90887 | 1.24863 | 1.25904 | 1.63687 |
| Adgrv1        | -2.65697 | 0.01077 | 0.5175  | 0.50189 | 0.5208  | 0.17272 | 0.22294 | 0.29997 |
| Ccdc162       | -2.66048 | 0.00878 | 5.07489 | 4.74132 | 4.55576 | 1.77578 | 2.21328 | 2.43487 |
| Ppp1r32       | -2.66114 | 0.03533 | 1.49533 | 1.13013 | 1.23993 | 0.43475 | 0.6993  | 0.6472  |
| Osbpl6        | -2.6631  | 1.9E-09 | 6.36963 | 6.78781 | 6.81851 | 3.2833  | 3.46175 | 2.40288 |
| Gm28729       | -2.66497 | 6.3E-05 | 1.82053 | 2.40249 | 2.13383 | 0.84719 | 1.16805 | 0.90085 |
| Lrrc74b       | -2.66536 | 0.00012 | 3.3635  | 3.24977 | 3.31529 | 1.34701 | 1.59538 | 1.55633 |

|               |          |         |         |         |         |         |         |         |
|---------------|----------|---------|---------|---------|---------|---------|---------|---------|
| Vnn3          | -2.66801 | 0.00503 | 0.96309 | 1.36477 | 1.54273 | 0.74376 | 0.70374 | 0.26052 |
| Ccdc148       | -2.66842 | 0.00694 | 0.40435 | 0.28266 | 0.35442 | 0.16233 | 0.14659 | 0.16534 |
| Irx5          | -2.66871 | 2.7E-07 | 2.78886 | 3.80831 | 3.75784 | 1.69765 | 1.902   | 1.09389 |
| Ccdc87        | -2.67474 | 0.04109 | 0.386   | 0.5683  | 0.36371 | 0.1503  | 0.26862 | 0.18646 |
| 2010300C02Rik | -2.67534 | 1.9E-05 | 5.67064 | 5.8294  | 5.79665 | 2.32623 | 2.59499 | 2.78901 |
| Gpr88         | -2.68178 | 0.0188  | 0.37332 | 0.49162 | 0.44557 | 0.1809  | 0.24248 | 0.16831 |
| Galnt13       | -2.68588 | 0.00174 | 0.22332 | 0.23975 | 0.39982 | 0.15217 | 0.17406 | 0.04531 |
| BC051019      | -2.68648 | 2.4E-05 | 5.09764 | 5.68057 | 6.11337 | 2.56452 | 2.75007 | 2.27926 |
| Zbbx          | -2.68816 | 0.00116 | 3.0468  | 2.59201 | 2.84383 | 1.14905 | 1.26019 | 1.39956 |
| Gm15728       | -2.68832 | 0.04193 | 0.31837 | 0.31549 | 0.25383 | 0.24475 | 0.09544 | 0.03312 |
| Gm7173        | -2.694   | 1.2E-05 | 1.19657 | 1.18751 | 1.31123 | 0.63618 | 0.56994 | 0.45555 |
| Myo1h         | -2.69663 | 0.00187 | 1.82449 | 1.89548 | 1.46961 | 0.64167 | 1.03214 | 0.71643 |
| Flt3l_1       | -2.69967 | 0.04952 | 4.74775 | 4.46992 | 4.6047  | 1.89508 | 2.57411 | 2.01512 |
| Ccdc114       | -2.70127 | 0.02719 | 3.81157 | 3.48271 | 2.91643 | 1.15867 | 1.32627 | 1.97685 |
| Tppp3         | -2.70191 | 3.6E-09 | 35.4871 | 45.4325 | 43.3099 | 19.0792 | 19.5401 | 16.7226 |
| lqcg          | -2.70199 | 2.7E-05 | 3.47621 | 3.85084 | 4.05882 | 1.60204 | 1.93883 | 1.70352 |
| Nek5          | -2.70364 | 0.00045 | 4.96695 | 3.49018 | 4.25474 | 1.75039 | 1.93569 | 1.99504 |
| Rd3           | -2.70371 | 0.02339 | 0.28586 | 0.36826 | 0.57719 | 0.16696 | 0.3183  | 0.08285 |
| Grip1         | -2.70563 | 0.00045 | 0.80994 | 0.60032 | 0.51228 | 0.22177 | 0.31348 | 0.30013 |
| Ccdc67        | -2.71796 | 0.00257 | 1.15891 | 1.06317 | 1.16646 | 0.52646 | 0.59021 | 0.39187 |
| Dixdc1        | -2.71933 | 3.4E-08 | 2.3702  | 2.85435 | 2.69488 | 1.1681  | 1.45713 | 0.9227  |
| Acsm1         | -2.71989 | 0.03599 | 1.35949 | 1.68269 | 1.84617 | 0.58125 | 0.85705 | 0.54082 |
| Mak           | -2.73043 | 3.4E-05 | 3.08223 | 3.13032 | 2.4433  | 1.37795 | 1.45382 | 1.05875 |
| Fads6         | -2.73336 | 0.00021 | 0.43256 | 0.59665 | 0.62992 | 0.262   | 0.33204 | 0.14183 |
| Cyp2s1        | -2.73808 | 1.1E-07 | 20.4862 | 23.1606 | 23.1809 | 9.4668  | 10.9432 | 8.98135 |
| Rsph10b       | -2.74093 | 0.00421 | 6.80562 | 6.01396 | 5.22029 | 2.2229  | 3.04131 | 2.51042 |
| Fbxo31        | -2.74416 | 2.4E-05 | 3.977   | 4.57687 | 4.60182 | 1.98008 | 1.99936 | 2.04404 |
| Spef2         | -2.75189 | 3.4E-05 | 3.25402 | 3.28561 | 3.26505 | 1.28645 | 1.4395  | 1.53447 |
| Tnn           | -2.75915 | 0.0208  | 0.56969 | 0.6824  | 0.84758 | 0.38138 | 0.35055 | 0.18249 |
| Ak7           | -2.75963 | 9E-07   | 7.72547 | 7.86984 | 8.79384 | 3.71441 | 3.65352 | 3.27962 |
| Spag17        | -2.7607  | 6.3E-05 | 3.36955 | 3.36148 | 3.32991 | 1.45603 | 1.58139 | 1.36168 |
| Rac3          | -2.76326 | 2.5E-06 | 4.04676 | 5.96625 | 6.29169 | 3.06389 | 2.36561 | 1.64202 |
| Dnali1        | -2.76519 | 1.5E-06 | 6.21451 | 6.77687 | 6.7033  | 2.56307 | 3.42568 | 2.65433 |
| Pcsk4         | -2.76747 | 0.03658 | 1.12031 | 0.65832 | 0.63894 | 0.29464 | 0.34469 | 0.43863 |
| Katnal2       | -2.77068 | 0.00559 | 0.49391 | 0.5164  | 0.58681 | 0.29266 | 0.27199 | 0.11618 |
| Sec14l4       | -2.77143 | 1.1E-09 | 8.12804 | 8.119   | 9.61476 | 4.29449 | 4.06915 | 2.94288 |
| Fsip1         | -2.77208 | 0.00466 | 1.54545 | 1.66858 | 1.83069 | 0.76223 | 1.03248 | 0.35833 |
| Ankrd66       | -2.77335 | 0.00235 | 2.90472 | 2.21118 | 1.80395 | 0.89969 | 1.35069 | 0.80361 |
| Morn2         | -2.77369 | 0.00657 | 2.43748 | 3.95417 | 2.29677 | 1.84547 | 1.31933 | 0.54947 |
| Cfap45        | -2.77847 | 0.00024 | 3.44774 | 4.61573 | 3.24871 | 1.75048 | 1.38315 | 1.69156 |
| 2010310C07Rik | -2.77868 | 0.02481 | 0.61824 | 0.68713 | 0.85669 | 0.42953 | 0.31888 | 0.14756 |
| Nov           | -2.78455 | 0.00121 | 1.15507 | 2.3495  | 3.06467 | 0.9942  | 0.88844 | 0.90448 |
| Rasgrf1       | -2.78467 | 0.02475 | 0.52027 | 0.56868 | 0.60908 | 0.27931 | 0.16896 | 0.27721 |
| Ccno          | -2.79376 | 0.00389 | 0.79026 | 1.03801 | 1.22647 | 0.88693 | 0.18116 | 0.18862 |
| 1810010H24Rik | -2.79588 | 5.3E-05 | 8.17733 | 9.7788  | 10.2412 | 4.0439  | 3.7314  | 4.27007 |
| Cfap100       | -2.79659 | 0.01713 | 5.66998 | 4.77871 | 5.62175 | 1.69152 | 1.85513 | 3.11906 |
| Trpm3         | -2.80649 | 0.02063 | 0.4111  | 0.29732 | 0.27524 | 0.08846 | 0.2108  | 0.13169 |
| Shank2        | -2.80903 | 2.2E-05 | 3.3205  | 3.18561 | 3.40353 | 1.45691 | 1.45974 | 1.33638 |
| Tbc1d30       | -2.80932 | 1.8E-13 | 3.739   | 4.07977 | 4.15848 | 1.92129 | 2.14988 | 1.11921 |
| Prob1         | -2.80989 | 0.00067 | 6.54771 | 6.49677 | 6.94303 | 2.48006 | 2.92023 | 3.06462 |
| 1700007G11Rik | -2.81884 | 0.03832 | 2.2886  | 2.12069 | 2.15648 | 0.76606 | 0.82148 | 1.30334 |
| Lrriq1        | -2.82093 | 0.00112 | 3.77182 | 3.26635 | 3.53927 | 1.32792 | 1.28619 | 1.82805 |
| Cfap58        | -2.8301  | 8E-05   | 1.82497 | 2.32863 | 2.13724 | 0.94747 | 0.86362 | 0.88155 |
| Ctf1          | -2.83271 | 0.01346 | 0.81279 | 0.73911 | 0.90102 | 0.26063 | 0.46582 | 0.32333 |
| Gmnc          | -2.83476 | 0.00951 | 0.34174 | 0.22012 | 0.54339 | 0.15524 | 0.18728 | 0.11555 |
| Amy1          | -2.83536 | 0.00081 | 1.1135  | 0.71723 | 1.00153 | 0.39087 | 0.41915 | 0.41074 |



|               |          |         |         |         |         |         |         |         |
|---------------|----------|---------|---------|---------|---------|---------|---------|---------|
| Vwa3a         | -2.84092 | 0.00096 | 4.74765 | 4.89046 | 4.43303 | 1.53773 | 2.11015 | 2.231   |
| Sh3bgr        | -2.84232 | 0.01183 | 0.90488 | 0.82571 | 1.22567 | 0.41106 | 0.4959  | 0.30597 |
| Cep126        | -2.84386 | 1.7E-08 | 4.91204 | 5.80871 | 5.58977 | 2.16275 | 2.44808 | 2.29975 |
| Gspt2         | -2.8444  | 0.00186 | 0.41516 | 0.53483 | 0.67373 | 0.23051 | 0.29213 | 0.15598 |
| Ttc25         | -2.84442 | 0.0016  | 1.70244 | 1.87638 | 1.72447 | 0.77338 | 0.4976  | 0.94024 |
| Hydin         | -2.84741 | 1.6E-07 | 4.37561 | 4.8666  | 4.70616 | 1.84935 | 1.98787 | 2.01415 |
| Zmynd10       | -2.84965 | 5E-05   | 5.61176 | 4.36223 | 4.47726 | 1.48863 | 1.75597 | 2.3269  |
| Adhfe1        | -2.85429 | 0.0059  | 0.66905 | 0.87181 | 0.80434 | 0.44018 | 0.44955 | 0.31204 |
| Scgb3a2       | -2.86406 | 0.00092 | 208.605 | 258.734 | 440.841 | 126.231 | 155.061 | 95.5678 |
| Faim2         | -2.86447 | 0.00011 | 0.6174  | 0.96106 | 1.16351 | 0.43823 | 0.48874 | 0.20876 |
| Tekt1         | -2.86575 | 1.2E-07 | 4.46253 | 4.57138 | 4.40757 | 2.44243 | 1.57148 | 1.67256 |
| Abca4         | -2.86977 | 0.00022 | 0.31918 | 0.23051 | 0.32126 | 0.11863 | 0.16962 | 0.13736 |
| Kcnh3         | -2.87128 | 0.01723 | 0.92489 | 0.79433 | 1.39899 | 0.30959 | 0.3557  | 0.62548 |
| Cep70         | -2.87203 | 4.3E-13 | 3.41137 | 3.53757 | 3.74447 | 1.6651  | 1.52039 | 1.1535  |
| Stk36         | -2.87557 | 0.00031 | 2.61474 | 2.52487 | 2.52762 | 0.96009 | 0.97676 | 1.24603 |
| Cckar         | -2.87676 | 4.1E-05 | 5.25804 | 6.87536 | 8.94934 | 3.87339 | 3.36906 | 1.66581 |
| Gm5148        | -2.87751 | 0.02414 | 0.33533 | 0.59518 | 0.25278 | 0.24373 | 0.17424 | 0.12095 |
| Efhb          | -2.87788 | 0.00141 | 1.93358 | 2.67388 | 1.69843 | 0.89326 | 1.08561 | 0.70922 |
| Acss1         | -2.87858 | 1.7E-07 | 7.33068 | 10.106  | 10.5702 | 3.55087 | 4.38409 | 3.74314 |
| Lhb           | -2.88088 | 0.0405  | 2.058   | 1.54654 | 1.57559 | 0.70117 | 0.50127 | 1.04382 |
| Cfap44        | -2.88451 | 0.00975 | 12.2191 | 11.3319 | 10.5172 | 4.08616 | 4.75195 | 5.23582 |
| Dnah1         | -2.88514 | 0.00237 | 3.05552 | 3.00238 | 2.71953 | 0.92331 | 1.23434 | 1.44782 |
| Elmod1        | -2.88552 | 8.1E-08 | 1.74469 | 1.65976 | 1.79572 | 0.75599 | 0.81068 | 0.61717 |
| Gm867         | -2.8867  | 0.00416 | 11.2848 | 11.6547 | 8.07599 | 3.89348 | 4.17518 | 4.92674 |
| Stpg1         | -2.88987 | 0.00346 | 0.51399 | 0.76025 | 0.64576 | 0.33727 | 0.19475 | 0.30898 |
| Dnah7b        | -2.89947 | 0.00077 | 2.05579 | 2.02423 | 1.84664 | 0.79708 | 0.94831 | 0.73203 |
| Tll8          | -2.90489 | 0.00717 | 0.55968 | 0.56806 | 0.50339 | 0.20802 | 0.29743 | 0.17204 |
| Pm20d2        | -2.90684 | 0.02698 | 0.99856 | 0.98011 | 0.71689 | 0.21601 | 0.27797 | 0.70745 |
| Nek11         | -2.90842 | 0.00276 | 1.33502 | 1.79921 | 1.35472 | 0.63446 | 0.58031 | 0.63893 |
| Pnma1         | -2.90972 | 0.00286 | 1.99627 | 1.84146 | 1.67203 | 0.60457 | 1.18857 | 0.65001 |
| Tekt2         | -2.91109 | 0.0025  | 3.5801  | 3.23238 | 2.50845 | 1.45954 | 1.38627 | 0.99328 |
| Cfap221       | -2.91498 | 0.00067 | 1.04709 | 1.41315 | 1.21216 | 0.27181 | 0.64124 | 0.64742 |
| 1700029J07Rik | -2.919   | 0.00184 | 3.3419  | 3.30748 | 3.35891 | 1.01209 | 1.3644  | 1.72192 |
| Cfap69        | -2.92122 | 1.3E-07 | 3.27649 | 3.14557 | 2.91063 | 1.42327 | 1.5155  | 0.9848  |
| Srcin1        | -2.92328 | 0.00094 | 2.93794 | 2.85231 | 2.39006 | 0.8787  | 1.12895 | 1.33279 |
| Iqca          | -2.92485 | 3E-06   | 2.40545 | 2.64362 | 2.42025 | 0.98161 | 1.07249 | 1.04773 |
| Hsph1         | -2.92535 | 0.00318 | 4.33278 | 6.92686 | 7.65638 | 2.34447 | 2.58426 | 2.64604 |
| Ccdc146       | -2.92741 | 0.00044 | 3.87057 | 3.76968 | 3.77873 | 1.57703 | 1.51619 | 1.75403 |
| Igfbp6        | -2.93199 | 0.00059 | 9.25404 | 10.6418 | 13.9665 | 4.56013 | 4.96647 | 4.24287 |
| Grm4          | -2.93457 | 0.00444 | 0.42636 | 0.38026 | 0.43265 | 0.14899 | 0.2077  | 0.15526 |
| Dnaic1        | -2.93838 | 0.00407 | 2.53911 | 2.18067 | 2.8356  | 0.68353 | 1.16056 | 1.22955 |
| Ldhb          | -2.9392  | 1.3E-06 | 23.8293 | 27.9551 | 44.07   | 16.553  | 12.8259 | 9.76671 |
| Gm26908       | -2.94031 | 0.00036 | 2.02437 | 1.9216  | 1.70671 | 0.67761 | 0.83045 | 0.79259 |
| Gm1673        | -2.94176 | 0.03894 | 1.30355 | 2.12711 | 1.84245 | 0.82904 | 0.63501 | 0.70524 |
| 1700001L19Rik | -2.94192 | 0.00333 | 1.59173 | 1.57416 | 1.49984 | 0.43823 | 0.56393 | 0.97858 |
| Spag8         | -2.94817 | 0.00767 | 3.20076 | 3.51501 | 2.37323 | 1.19182 | 1.3803  | 1.20649 |
| Syt5          | -2.95216 | 2.8E-05 | 1.79545 | 2.8637  | 2.17517 | 1.03202 | 1.03529 | 0.74339 |
| Armc3         | -2.96452 | 0.00017 | 1.44832 | 1.58792 | 1.85833 | 0.78392 | 0.54041 | 0.66687 |
| RP23-163N19.1 | -2.96522 | 2E-05   | 0.86543 | 0.65684 | 0.83444 | 0.40229 | 0.37257 | 0.16333 |
| Gm13111       | -2.96992 | 2.6E-05 | 1.25567 | 1.03612 | 1.43838 | 0.40265 | 0.74362 | 0.36631 |
| Akap14        | -2.97124 | 0.00197 | 2.33592 | 2.5077  | 3.76016 | 1.238   | 1.09051 | 1.11896 |
| Tmem132d      | -2.97829 | 4.2E-05 | 0.44404 | 0.47381 | 0.82414 | 0.31786 | 0.22287 | 0.1456  |
| Mettl7a1      | -2.98178 | 1.3E-07 | 72.7579 | 81.5391 | 110.844 | 38.5011 | 44.4453 | 26.8101 |
| Pir           | -2.98899 | 3.3E-08 | 3.12521 | 2.95379 | 3.6403  | 1.25562 | 1.40767 | 1.25323 |
| Fam179a       | -2.98914 | 0.00376 | 7.1019  | 6.97828 | 5.66913 | 2.18368 | 2.32656 | 3.27178 |
| Gpr155        | -2.99103 | 8E-08   | 3.05533 | 3.9921  | 5.3273  | 1.50659 | 2.11172 | 1.53643 |

|               |          |         |         |         |         |         |         |         |
|---------------|----------|---------|---------|---------|---------|---------|---------|---------|
| Chst8         | -2.99429 | 0.00354 | 0.40302 | 0.58575 | 0.67187 | 0.2535  | 0.27184 | 0.12579 |
| Ccdc170       | -2.9968  | 0.00053 | 5.86444 | 6.65617 | 5.93762 | 2.38198 | 2.1062  | 2.8306  |
| P2rx6         | -2.99765 | 0.0138  | 3.55816 | 3.29958 | 3.16763 | 0.97181 | 1.04212 | 1.80102 |
| Rsph14        | -3.00133 | 0.00015 | 1.18709 | 0.89518 | 1.41866 | 0.55242 | 0.45134 | 0.39161 |
| Dcdc5         | -3.00421 | 0.00449 | 1.72001 | 1.6607  | 1.55025 | 0.39796 | 0.62451 | 0.91032 |
| Trp73         | -3.00506 | 2.3E-07 | 1.63889 | 1.94888 | 1.93034 | 0.73019 | 0.78302 | 0.70336 |
| Cfap61        | -3.0051  | 3.2E-05 | 1.60338 | 1.5677  | 1.4101  | 0.5827  | 0.57679 | 0.6784  |
| Kndc1         | -3.01466 | 0.00105 | 2.6466  | 2.79053 | 2.48614 | 0.91743 | 0.96794 | 1.2336  |
| Rgs22         | -3.01983 | 0.00192 | 8.28229 | 6.51765 | 6.44461 | 2.21319 | 3.24962 | 3.01596 |
| Mns1          | -3.02332 | 1E-06   | 1.78871 | 2.84895 | 2.77333 | 1.3001  | 1.29911 | 1.09968 |
| Drc1          | -3.02671 | 1.7E-06 | 5.55814 | 5.35973 | 5.05352 | 2.09672 | 2.15342 | 2.15417 |
| Ccdc30        | -3.03258 | 0.00282 | 3.40541 | 3.09472 | 3.29588 | 1.09129 | 1.27312 | 1.55317 |
| Kcnk12        | -3.04113 | 0.00478 | 2.56758 | 2.16643 | 1.78268 | 0.49111 | 0.92162 | 1.21851 |
| Rilp          | -3.04219 | 3.9E-06 | 3.41559 | 3.50117 | 4.20469 | 0.95099 | 2.36163 | 1.11767 |
| 9230110C19Rik | -3.04318 | 0.00073 | 0.93124 | 1.45842 | 1.65172 | 0.84607 | 0.5337  | 0.14818 |
| 9530026P05Rik | -3.04536 | 1.5E-07 | 0.86449 | 0.91179 | 1.10041 | 0.49606 | 0.35464 | 0.3077  |
| Asb14         | -3.05007 | 0.01106 | 3.2844  | 2.46815 | 2.83689 | 0.96359 | 1.23331 | 1.20312 |
| Ttc6          | -3.05341 | 1.6E-05 | 1.43562 | 1.13208 | 1.0945  | 0.52173 | 0.38146 | 0.49426 |
| Gsg1l         | -3.05872 | 0.01593 | 0.24453 | 0.32456 | 0.37704 | 0.08079 | 0.12995 | 0.1804  |
| Wdr66         | -3.06467 | 5.1E-07 | 4.31379 | 4.40627 | 4.15148 | 1.60952 | 1.84926 | 1.63368 |
| Reep6         | -3.06963 | 4.2E-06 | 2.26197 | 4.1244  | 4.75464 | 1.89702 | 1.4918  | 0.94136 |
| Ttc34         | -3.093   | 0.00442 | 1.51543 | 1.92198 | 1.51096 | 0.59236 | 0.68672 | 0.715   |
| Mapk15        | -3.09388 | 0.02094 | 10.6924 | 10.499  | 10.2356 | 3.00099 | 3.54988 | 5.29655 |
| Fam47e        | -3.10261 | 0.00075 | 3.38911 | 4.01105 | 4.24497 | 1.65224 | 1.65098 | 1.22983 |
| Gm10069       | -3.10733 | 0.04586 | 0.19956 | 0.29136 | 0.31967 | 0.09065 | 0.09721 | 0.10797 |
| Grhl1         | -3.10742 | 2E-08   | 1.91857 | 1.88312 | 2.32433 | 0.86024 | 0.75255 | 0.77511 |
| Casc1         | -3.11326 | 4.4E-05 | 1.72841 | 1.8004  | 1.53994 | 0.55973 | 0.65858 | 0.74067 |
| A830018L16Rik | -3.11579 | 3.1E-06 | 0.41785 | 0.48936 | 0.47427 | 0.14668 | 0.25907 | 0.14129 |
| Pi16          | -3.12643 | 2.7E-06 | 2.49352 | 3.8134  | 5.15257 | 1.80841 | 1.49173 | 1.06503 |
| Fam92b        | -3.1265  | 0.00781 | 2.56309 | 2.73816 | 2.76856 | 0.79516 | 1.52267 | 0.50732 |
| Aim1l         | -3.14064 | 0.00062 | 1.84666 | 1.98516 | 1.84659 | 0.69622 | 0.74659 | 0.73062 |
| Gpt           | -3.14326 | 3.2E-09 | 4.33794 | 3.68274 | 4.93321 | 1.67615 | 2.38038 | 0.87671 |
| Cyp3a13       | -3.15037 | 0.01663 | 0.41303 | 0.48141 | 0.75057 | 0.37525 | 0.14372 | 0.07981 |
| Sptbn2        | -3.15357 | 1.6E-08 | 1.45857 | 1.57037 | 1.54367 | 0.7106  | 0.77231 | 0.54323 |
| Fbxl13        | -3.17007 | 0.00482 | 1.19804 | 0.94318 | 1.12888 | 0.2948  | 0.48635 | 0.47262 |
| Ccdc180       | -3.17185 | 0.00837 | 6.85532 | 5.95833 | 5.79188 | 1.84157 | 2.00692 | 3.03126 |
| Tsnaxip1      | -3.17863 | 0.00169 | 3.56349 | 3.36312 | 3.32088 | 1.35197 | 1.22087 | 1.32411 |
| Spata17       | -3.19187 | 3.8E-05 | 1.97509 | 1.80065 | 1.48885 | 0.55214 | 0.74011 | 0.73977 |
| Acsl1         | -3.1924  | 4.6E-11 | 5.49368 | 6.23809 | 6.86152 | 2.53751 | 2.88275 | 1.68307 |
| Tll9          | -3.20622 | 0.00054 | 1.09915 | 1.13707 | 1.08278 | 0.40853 | 0.41375 | 0.43924 |
| Rmdn2         | -3.20842 | 1.1E-07 | 2.8069  | 2.74316 | 4.0585  | 1.40701 | 1.36736 | 0.78547 |
| BC021891      | -3.20875 | 0.00042 | 0.64337 | 0.61833 | 0.46189 | 0.18093 | 0.25372 | 0.22791 |
| Tcp11         | -3.21366 | 3.6E-06 | 3.79708 | 3.54774 | 3.1847  | 1.0994  | 1.50416 | 1.41091 |
| Ccdc108       | -3.21674 | 0.00687 | 16.2545 | 14.0078 | 13.1086 | 3.67933 | 4.61943 | 6.9561  |
| Ttc41         | -3.22406 | 0.00316 | 1.05115 | 1.25741 | 0.83128 | 0.4434  | 0.36576 | 0.38082 |
| Alas1         | -3.22461 | 1.8E-12 | 33.6263 | 45.2443 | 54.6008 | 18.1455 | 18.5318 | 13.0471 |
| Pomgnt2       | -3.22563 | 3.2E-06 | 1.29174 | 1.36739 | 1.21717 | 0.57316 | 0.61463 | 0.24379 |
| Kctd8         | -3.22956 | 0.00038 | 1.00833 | 1.24347 | 1.14502 | 0.42282 | 0.40304 | 0.4546  |
| Klhl34        | -3.23902 | 0.02197 | 0.63096 | 0.34836 | 0.80687 | 0.32758 | 0.13173 | 0.18287 |
| Col23a1       | -3.24089 | 1.6E-11 | 7.61698 | 8.14776 | 10.3003 | 3.5638  | 3.43652 | 2.67325 |
| Rp1           | -3.24475 | 6.1E-06 | 2.2172  | 2.07455 | 2.18265 | 0.79805 | 0.9041  | 0.71858 |
| Colq          | -3.25772 | 0.00058 | 1.03191 | 0.92562 | 0.97234 | 0.37501 | 0.22342 | 0.49625 |
| 9030622O22Rik | -3.27294 | 0.00248 | 3.11085 | 2.9834  | 2.54043 | 1.03633 | 0.90926 | 1.26227 |
| Atp6v1c2      | -3.29079 | 2.6E-06 | 6.48791 | 5.57202 | 7.34398 | 2.29659 | 3.16053 | 1.70945 |
| Elf5          | -3.29214 | 1.3E-06 | 1.09807 | 1.29989 | 1.53804 | 0.56623 | 0.44817 | 0.42147 |
| Inmt          | -3.29218 | 0.00037 | 46.438  | 61.3685 | 104.052 | 27.2856 | 36.2163 | 14.4491 |

|               |          |         |         |         |         |         |         |         |
|---------------|----------|---------|---------|---------|---------|---------|---------|---------|
| Tmie          | -3.29784 | 1.2E-05 | 1.15563 | 1.47663 | 1.24827 | 0.40973 | 0.57668 | 0.41935 |
| Ppil6         | -3.29849 | 0.00097 | 6.78862 | 6.34283 | 4.85026 | 2.16889 | 2.61654 | 1.9171  |
| Lgals12       | -3.29986 | 0.00093 | 0.69187 | 0.70224 | 0.91863 | 0.28573 | 0.33704 | 0.21268 |
| Bnpl          | -3.30393 | 0.01098 | 0.64542 | 0.71734 | 1.32364 | 0.31044 | 0.51785 | 0.1027  |
| Gm26549       | -3.30425 | 0.02606 | 1.51477 | 1.54873 | 1.22342 | 0.39321 | 0.70277 | 0.48781 |
| Kif27         | -3.31094 | 2.6E-05 | 4.67114 | 4.2635  | 4.53039 | 1.50936 | 1.67569 | 1.85043 |
| Six1          | -3.31387 | 0.00325 | 1.41267 | 1.2816  | 1.21863 | 0.3977  | 0.46524 | 0.56514 |
| 5330413P13Rik | -3.31728 | 0.00019 | 0.50736 | 0.74697 | 0.57368 | 0.21072 | 0.25422 | 0.17646 |
| Ak9           | -3.33511 | 0.0001  | 4.35537 | 4.11674 | 3.23127 | 1.20531 | 1.34129 | 1.65891 |
| Myb           | -3.33835 | 1.6E-06 | 4.43846 | 4.81781 | 4.5114  | 1.86692 | 1.72172 | 1.44522 |
| Cfap157       | -3.34048 | 0.00775 | 4.85304 | 4.21004 | 4.20335 | 1.24705 | 1.194   | 2.25428 |
| Slurp1        | -3.35606 | 0.03652 | 0.47573 | 0.33197 | 0.3362  | 0.1891  | 0.20278 | 0       |
| Cux2          | -3.36292 | 7E-07   | 0.86498 | 0.88402 | 1.00251 | 0.33793 | 0.28653 | 0.36268 |
| Cfap46        | -3.36405 | 0.00148 | 7.10027 | 5.75691 | 5.88861 | 1.69219 | 1.86989 | 2.94112 |
| Esy3          | -3.36481 | 5.7E-07 | 2.12061 | 2.11135 | 2.12197 | 0.73316 | 0.96904 | 0.58379 |
| Myh7          | -3.36736 | 4.4E-06 | 1.05632 | 0.98571 | 1.11019 | 0.38758 | 0.39583 | 0.35718 |
| Igfbp3        | -3.37373 | 0.00017 | 1.42095 | 1.89036 | 3.20292 | 0.68347 | 0.76007 | 0.82905 |
| Ccdc57        | -3.38459 | 6.6E-05 | 3.51813 | 2.70132 | 2.5686  | 0.80439 | 0.97609 | 1.35504 |
| Prr36         | -3.38874 | 0.00273 | 0.7667  | 0.94942 | 0.65524 | 0.35639 | 0.50378 | 0.36174 |
| Ccdc39        | -3.38943 | 4E-05   | 5.84665 | 6.19862 | 6.07219 | 2.2142  | 2.00911 | 2.26617 |
| Daw1          | -3.39677 | 0.00712 | 1.34479 | 1.08495 | 1.45915 | 0.2962  | 0.59555 | 0.49606 |
| Cadm2         | -3.39914 | 0.00863 | 0.17781 | 0.13744 | 0.20943 | 0.04847 | 0.05197 | 0.0962  |
| Lpar3         | -3.40328 | 3E-08   | 4.24712 | 4.65065 | 5.10248 | 1.54349 | 1.99999 | 1.4361  |
| Kcnk2         | -3.40872 | 4.4E-06 | 4.26952 | 4.43956 | 5.93483 | 2.13188 | 2.13143 | 0.97836 |
| Dnah2         | -3.43254 | 0.00065 | 3.58316 | 3.82289 | 3.06338 | 0.8099  | 1.14096 | 1.61546 |
| Calcoco2      | -3.4429  | 0.04191 | 0.53799 | 0.60065 | 0.40554 | 0.09776 | 0.26208 | 0.14553 |
| Ect2l         | -3.44443 | 1.4E-06 | 1.84371 | 1.88253 | 1.40913 | 0.53975 | 0.73848 | 0.55415 |
| Entpd3        | -3.45441 | 0.00098 | 0.55739 | 0.45875 | 0.56898 | 0.1899  | 0.20364 | 0.15706 |
| Hepacam       | -3.45673 | 4.6E-05 | 0.75561 | 0.7832  | 0.78564 | 0.18938 | 0.3554  | 0.28193 |
| Cfap99        | -3.46068 | 0.00016 | 1.97172 | 2.152   | 1.8966  | 0.63446 | 0.60032 | 0.83339 |
| Fam161a       | -3.46149 | 0.00014 | 9.54205 | 9.67728 | 8.76689 | 2.45123 | 3.01513 | 4.05158 |
| Rnf186        | -3.47316 | 4.7E-06 | 4.11949 | 4.85719 | 5.85542 | 2.09341 | 1.70066 | 1.32212 |
| Ccdc187       | -3.47738 | 0.00029 | 8.94528 | 9.16107 | 8.60448 | 2.39463 | 2.80997 | 3.7929  |
| Ccdc151       | -3.4857  | 1E-05   | 2.80979 | 3.00898 | 2.77833 | 1.16611 | 1.08149 | 0.75069 |
| Cfap161       | -3.50081 | 1.5E-07 | 2.02427 | 2.25536 | 1.98474 | 0.77045 | 0.66629 | 0.73997 |
| Acot1         | -3.50901 | 0.00034 | 3.91567 | 5.33261 | 6.74674 | 1.37221 | 1.85299 | 2.42108 |
| T2            | -3.52008 | 0.01911 | 3.84305 | 2.24267 | 1.94987 | 1.07434 | 0.81605 | 0.79967 |
| Mgat3         | -3.52722 | 4.7E-07 | 7.58977 | 9.16742 | 8.96595 | 2.41179 | 3.47873 | 2.85714 |
| Fhad1         | -3.5331  | 0.00109 | 11.0909 | 9.58619 | 8.88504 | 2.41271 | 2.83631 | 4.55212 |
| Cfap57        | -3.53895 | 1.7E-09 | 2.99369 | 2.99959 | 2.90264 | 1.00519 | 1.26813 | 0.79221 |
| Synm          | -3.5575  | 2E-08   | 6.35396 | 8.29878 | 8.62855 | 3.74538 | 4.31626 | 3.39002 |
| Odf3b         | -3.57306 | 0.00767 | 16.1993 | 14.1287 | 12.496  | 3.12659 | 4.41589 | 6.58442 |
| Hmcn2         | -3.58853 | 4.2E-07 | 0.9278  | 1.02049 | 0.95604 | 0.28591 | 0.35417 | 0.33757 |
| 9330159F19Rik | -3.58981 | 0.03835 | 0.31756 | 0.2987  | 0.25648 | 0.09617 | 0.14733 | 0       |
| Tex26         | -3.59058 | 0.01066 | 1.22471 | 1.1969  | 0.83566 | 0.42206 | 0.28802 | 0.39984 |
| Pgbd1         | -3.61421 | 0.00115 | 0.38921 | 0.39694 | 0.41259 | 0.13261 | 0.1659  | 0.0658  |
| Gsta3         | -3.62016 | 2.5E-11 | 20.3587 | 22.6638 | 34.0931 | 9.22504 | 9.84227 | 7.11057 |
| Foxo6         | -3.62308 | 0.00112 | 0.66698 | 0.68739 | 0.50278 | 0.21209 | 0.22744 | 0.18042 |
| Slc7a10       | -3.64187 | 8.1E-08 | 1.98293 | 2.12875 | 2.49128 | 0.78819 | 0.72448 | 0.50287 |
| Ccdc13        | -3.64852 | 0.0069  | 2.27077 | 2.12551 | 2.13968 | 0.32453 | 0.67117 | 1.10429 |
| Slc6a15       | -3.64966 | 8.3E-06 | 0.67028 | 0.9046  | 0.90226 | 0.43498 | 0.25655 | 0.09713 |
| Gm16136       | -3.65595 | 6.2E-05 | 3.06648 | 3.01899 | 2.67803 | 1.22314 | 1.23877 | 0.40464 |
| Ankef1        | -3.65744 | 0.00063 | 0.52191 | 0.45866 | 0.33167 | 0.07719 | 0.18921 | 0.18058 |
| Aldh3a1       | -3.66538 | 0.00011 | 2.2004  | 3.81811 | 5.33153 | 1.01998 | 1.22503 | 1.39696 |
| Gria1         | -3.6806  | 0.00175 | 0.8803  | 1.0163  | 1.53658 | 0.3409  | 0.47804 | 0.29278 |
| Gdgd2         | -3.6831  | 0.00092 | 1.21095 | 1.72251 | 1.44414 | 0.46415 | 0.4793  | 0.48624 |



|               |          |         |         |         |         |         |         |         |
|---------------|----------|---------|---------|---------|---------|---------|---------|---------|
| Chad          | -3.68466 | 0.00128 | 5.29475 | 5.88474 | 7.23907 | 1.41486 | 2.32642 | 2.10628 |
| Fn3k          | -3.68847 | 0.00169 | 0.23789 | 0.28944 | 0.35492 | 0.07205 | 0.15452 | 0.05363 |
| Zbtb16        | -3.70342 | 0.00204 | 19.462  | 22.7398 | 26.2867 | 2.44461 | 8.04135 | 10.4266 |
| 5330417C22Rik | -3.70982 | 2.9E-10 | 8.88123 | 11.263  | 13.374  | 4.32359 | 3.98947 | 2.52594 |
| Tbx1          | -3.74325 | 0.00112 | 5.49648 | 5.35277 | 5.50288 | 1.42681 | 1.57785 | 2.19044 |
| Hs3st6        | -3.76164 | 0.002   | 1.57389 | 1.59747 | 0.94375 | 0.38999 | 0.5576  | 0.38704 |
| Gm44276       | -3.7617  | 0.00441 | 0.22044 | 0.20195 | 0.19387 | 0.08011 | 0.07159 | 0.03975 |
| Gm16194       | -3.76867 | 0.03089 | 1.42768 | 1.32832 | 0.78474 | 0.21619 | 0.34774 | 0.64367 |
| Crocc2        | -3.7701  | 0.03548 | 4.54869 | 4.45264 | 3.06479 | 0.78877 | 1.13175 | 1.81922 |
| Pclo          | -3.77769 | 0.00021 | 0.7223  | 0.52361 | 0.83794 | 0.2505  | 0.21566 | 0.17858 |
| Ccdc17        | -3.77913 | 0.00171 | 31.1508 | 26.1574 | 19.0636 | 6.50315 | 7.18715 | 9.73053 |
| Ccdc150       | -3.79229 | 0.02848 | 1.28527 | 0.88008 | 0.70373 | 0.22092 | 0.27075 | 0.42285 |
| Gm26910       | -3.79679 | 0.01497 | 0.87457 | 1.93143 | 1.7659  | 0.56757 | 0.24345 | 0.67594 |
| Dnah10        | -3.79873 | 0.0011  | 9.55781 | 8.5531  | 7.26921 | 1.82245 | 2.22897 | 3.68829 |
| Ccdc24        | -3.79891 | 5.7E-05 | 2.42729 | 2.28476 | 2.10419 | 0.79391 | 1.02162 | 0.70913 |
| Cfap74        | -3.82887 | 0.00027 | 4.05759 | 3.21384 | 3.24531 | 0.79622 | 1.16975 | 1.35127 |
| Cldn8         | -3.85533 | 0.00306 | 0.55523 | 0.60401 | 1.01147 | 0.26904 | 0.32457 | 0.05006 |
| Vpreb3        | -3.8845  | 1.6E-07 | 6.90351 | 9.59096 | 12.436  | 2.21371 | 2.86843 | 3.84476 |
| Zfp354b       | -3.88522 | 0.02696 | 0.51334 | 0.54461 | 0.51216 | 0.13718 | 0.1471  | 0.16337 |
| Plk5          | -3.9023  | 0.00405 | 0.5536  | 0.97886 | 0.58301 | 0.14793 | 0.22209 | 0.30831 |
| Ccna1         | -3.90623 | 0.00419 | 0.66534 | 0.5306  | 0.7165  | 0.34543 | 0.13891 | 0.06428 |
| Wdr93         | -3.91108 | 4.1E-06 | 1.56478 | 1.96665 | 1.36656 | 0.34675 | 0.59494 | 0.61944 |
| Dner          | -3.93277 | 0.00389 | 0.27344 | 0.43836 | 0.36071 | 0.08281 | 0.10656 | 0.14793 |
| Ace2          | -3.94323 | 1.3E-05 | 2.38766 | 2.94649 | 3.18907 | 1.09518 | 0.99374 | 0.53301 |
| Dnaaf1        | -3.9444  | 3E-07   | 2.81315 | 2.97357 | 2.47597 | 0.8426  | 0.87344 | 0.91987 |
| Mlxipl        | -3.96921 | 0.00016 | 0.42517 | 0.4463  | 0.48966 | 0.14307 | 0.09205 | 0.19169 |
| Abhd12b       | -3.98872 | 0.00599 | 0.33192 | 0.45611 | 0.25021 | 0.14073 | 0.1078  | 0.05986 |
| Atp7b         | -4.00495 | 2.1E-12 | 6.75675 | 6.48222 | 7.45307 | 2.16808 | 2.37719 | 1.72259 |
| Ces1d         | -4.01351 | 1.6E-07 | 55.4389 | 65.8863 | 93.4465 | 26.3216 | 25.9306 | 12.9951 |
| Ccdc155       | -4.07068 | 0.00824 | 1.80684 | 1.96347 | 1.32033 | 0.20101 | 0.46704 | 0.84786 |
| Pon1          | -4.09907 | 3.7E-06 | 5.44671 | 5.60821 | 8.44983 | 2.35127 | 2.31616 | 1.09893 |
| Noxa1         | -4.13518 | 0.04709 | 0.97077 | 0.46318 | 0.66064 | 0.392   | 0.05254 | 0.14589 |
| Fam13a        | -4.1415  | 2.6E-12 | 6.03618 | 6.36764 | 6.98628 | 2.10351 | 2.22885 | 1.23022 |
| Krt79         | -4.16294 | 0.00101 | 0.87332 | 0.71432 | 1.05802 | 0.11335 | 0.2431  | 0.44998 |
| Six4          | -4.16996 | 7.5E-14 | 2.0165  | 1.81463 | 1.78654 | 0.61313 | 0.65749 | 0.38031 |
| Tas1r1        | -4.20487 | 0.00211 | 0.67012 | 0.70633 | 0.68884 | 0.16605 | 0.11871 | 0.32959 |
| Stk33         | -4.20803 | 2.6E-11 | 2.69443 | 3.21711 | 3.62256 | 0.74635 | 1.21653 | 0.79997 |
| Ttc16         | -4.21123 | 8.7E-06 | 2.89418 | 2.79045 | 2.68851 | 0.70699 | 0.77144 | 0.90477 |
| Cfap73        | -4.22169 | 0.01842 | 4.16627 | 4.71662 | 3.39043 | 0.68823 | 0.73802 | 2.04911 |
| Lrrc43        | -4.22308 | 0.01266 | 6.37384 | 5.58281 | 4.77289 | 1.22722 | 1.02813 | 2.34077 |
| Bmpr1b        | -4.25748 | 1.1E-10 | 1.40422 | 1.46979 | 1.29559 | 0.46513 | 0.42753 | 0.29676 |
| Lrrc23        | -4.26643 | 0.0007  | 24.8446 | 22.6331 | 21.0883 | 5.20904 | 4.89994 | 8.63892 |
| Ooep          | -4.27502 | 0.00132 | 0.65263 | 0.52547 | 0.61495 | 0.29647 | 0.11922 | 0.05517 |
| Mycl          | -4.2977  | 3.8E-10 | 4.18977 | 3.93217 | 4.1514  | 1.02033 | 1.36769 | 1.08079 |
| Cbs           | -4.35208 | 5.1E-08 | 1.06955 | 1.14261 | 1.32736 | 0.45032 | 0.3304  | 0.17642 |
| Ces1g         | -4.36536 | 0.0022  | 0.47475 | 1.41137 | 2.23671 | 0.59723 | 0.39138 | 0.09879 |
| Scn5a         | -4.39579 | 7.1E-06 | 2.90559 | 2.46978 | 2.46595 | 0.49724 | 0.71741 | 0.90173 |
| Nr1i2         | -4.39809 | 0.00678 | 0.54654 | 0.38138 | 0.35406 | 0.15517 | 0.13312 | 0.0462  |
| Trim66        | -4.42192 | 0.00014 | 0.17226 | 0.15534 | 0.17043 | 0.0313  | 0.05035 | 0.05825 |
| Mettl7a3      | -4.43847 | 0.00097 | 0.75458 | 0.97208 | 1.52361 | 0.29382 | 0.36759 | 0.2187  |
| Tymp          | -4.44634 | 0.00599 | 8.60517 | 6.65503 | 6.29309 | 0.93352 | 1.9187  | 3.18476 |
| 9130230L23Rik | -4.463   | 5.1E-07 | 1.96994 | 1.79596 | 1.85622 | 0.42679 | 0.63484 | 0.4714  |
| Foxn4         | -4.46867 | 0.01128 | 0.2587  | 0.31105 | 0.34127 | 0.07051 | 0.10082 | 0.06998 |
| Itpka         | -4.48165 | 3.2E-11 | 2.7822  | 3.37818 | 3.61598 | 0.91522 | 0.88797 | 0.84344 |
| Plch2         | -4.58903 | 0.00176 | 1.60182 | 1.51418 | 1.38779 | 0.24418 | 0.42943 | 0.50891 |
| Ccdc89        | -4.63366 | 0.00493 | 0.54166 | 0.39363 | 0.23557 | 0.18928 | 0.08119 | 0       |

|               |          |         |         |         |         |         |         |         |
|---------------|----------|---------|---------|---------|---------|---------|---------|---------|
| Bbof1         | -4.63714 | 8.9E-07 | 7.3779  | 7.04042 | 6.54737 | 1.52506 | 1.6354  | 2.37593 |
| Fhdc1         | -4.67079 | 7.2E-11 | 7.49679 | 8.52891 | 8.3877  | 2.28725 | 2.42563 | 1.65546 |
| Cyp4f15       | -4.6939  | 5.4E-10 | 2.10185 | 2.16616 | 2.59267 | 0.45137 | 0.67019 | 0.67194 |
| Cbr2          | -4.70454 | 2.2E-08 | 626.751 | 706.298 | 1178.17 | 240.742 | 234.214 | 151.373 |
| Cecr6         | -4.74959 | 1.1E-05 | 0.39404 | 0.49224 | 0.27003 | 0.09764 | 0.12215 | 0.07268 |
| B430010I23Rik | -4.75233 | 0.0002  | 14.1079 | 13.5822 | 15.0274 | 4.55525 | 3.53371 | 2.34461 |
| Klf15         | -4.78093 | 4E-05   | 4.90562 | 5.74271 | 8.83266 | 0.9936  | 1.88743 | 1.85951 |
| Cyp2f2        | -4.78469 | 1.1E-06 | 341.294 | 431.664 | 701.171 | 162.651 | 126.294 | 75.6639 |
| Tmem25        | -4.79049 | 0.00028 | 0.43441 | 0.46636 | 0.43491 | 0.12334 | 0.15871 | 0.03672 |
| Mcidas        | -4.9411  | 0.00573 | 0.40751 | 0.50907 | 0.55853 | 0.10098 | 0.07219 | 0.20043 |
| Ttll6         | -4.98661 | 2E-05   | 4.31855 | 4.05844 | 4.21838 | 0.69844 | 1.01332 | 1.28441 |
| Lrrc26        | -5.08607 | 6.9E-06 | 3.88404 | 6.67147 | 7.803   | 1.26505 | 1.42798 | 1.58591 |
| Gm12474       | -5.10376 | 0.00078 | 1.97918 | 1.27484 | 0.99074 | 0.44954 | 0.30129 | 0.25096 |
| Wdr27         | -5.13559 | 0.00011 | 1.52461 | 1.19299 | 1.08543 | 0.18469 | 0.3631  | 0.36659 |
| Ccl28         | -5.14292 | 0.00032 | 0.32688 | 0.42111 | 0.17601 | 0.08485 | 0.09099 | 0.03158 |
| Panx2         | -5.2023  | 0.01421 | 0.19385 | 0.18729 | 0.20549 | 0.06605 | 0.02361 | 0.03277 |
| Hhatl         | -5.22372 | 0.00015 | 0.73088 | 0.65624 | 0.59478 | 0.06037 | 0.19421 | 0.22467 |
| 2010001K21Rik | -5.23522 | 0.02469 | 1.84833 | 2.59757 | 1.89996 | 0.45799 | 0.49113 | 0.45454 |
| Aox3          | -5.25528 | 1.5E-16 | 11.1598 | 12.5769 | 15.3761 | 3.26708 | 3.43097 | 2.29765 |
| Fmo3          | -5.29073 | 2E-08   | 8.16781 | 10.2118 | 15.3926 | 2.42983 | 2.85212 | 2.24856 |
| Lypd2         | -5.31728 | 1.2E-08 | 9.76109 | 10.0377 | 15.2486 | 1.75035 | 3.37858 | 2.77943 |
| C330002G04Rik | -5.32947 | 1.9E-07 | 1.18881 | 1.45855 | 1.2402  | 0.23145 | 0.37229 | 0.28713 |
| Cntd1         | -5.34107 | 0.01889 | 0.19726 | 0.35576 | 0.39033 | 0.21506 | 0.11531 | 0.16008 |
| Gm20755       | -5.34603 | 0.0085  | 0.2864  | 0.49193 | 0.5847  | 0.17347 | 0       | 0.12912 |
| Slc4a5        | -5.42386 | 1.3E-13 | 5.60449 | 5.76823 | 7.07902 | 1.61086 | 1.41999 | 1.07709 |
| Gm6970        | -5.43855 | 0.01124 | 1.17848 | 1.46195 | 0.49353 | 0.23793 | 0.25515 | 0.1771  |
| E030044B06Rik | -5.44359 | 0.0158  | 0.48219 | 0.5916  | 0.58417 | 0.06258 | 0.26845 | 0       |
| Bcan          | -5.44407 | 0.00081 | 0.40771 | 0.53445 | 0.46506 | 0.13647 | 0.08363 | 0.08707 |
| Cnksr2        | -5.55179 | 5E-14   | 0.56463 | 0.64657 | 0.91333 | 0.16245 | 0.21088 | 0.07637 |
| Ces1f         | -5.55618 | 5E-06   | 0.47785 | 0.84359 | 1.2007  | 0.24119 | 0.20692 | 0.07181 |
| A430108G06Rik | -5.57666 | 3.8E-05 | 1.62355 | 1.94213 | 0.87418 | 0.26341 | 0.33896 | 0.39213 |
| Gabre         | -5.58273 | 1.9E-12 | 2.06234 | 2.00842 | 2.09944 | 0.38479 | 0.46645 | 0.49811 |
| Atp2b2        | -5.59184 | 4.2E-13 | 1.94302 | 1.76968 | 2.29996 | 0.47117 | 0.47158 | 0.35539 |
| Acaa1b        | -5.63812 | 0.00048 | 0.62228 | 0.41991 | 0.75388 | 0.28268 | 0.17322 | 0       |
| Ttll13        | -5.63949 | 0.00013 | 0.31295 | 0.34044 | 0.27522 | 0.03791 | 0.08131 | 0.08465 |
| Slc16a11      | -6.09944 | 6.9E-08 | 15.3655 | 16.8327 | 14.8645 | 2.57489 | 2.99406 | 3.60229 |
| D930020B18Rik | -6.13332 | 1.1E-05 | 0.77175 | 0.72044 | 0.66396 | 0.18291 | 0.06538 | 0.18153 |
| Dcdc2a        | -6.47085 | 5.4E-13 | 0.91587 | 1.17535 | 0.92251 | 0.21998 | 0.12308 | 0.22782 |
| Crb1          | -6.50811 | 7.6E-06 | 0.09572 | 0.18496 | 0.21797 | 0.03624 | 0.03109 | 0.02158 |
| Ccdc129       | -6.76271 | 7.8E-11 | 2.52705 | 2.60855 | 2.79329 | 0.59606 | 0.52082 | 0.29578 |
| Fam205c       | -6.78452 | 0.01098 | 0.4661  | 0.36027 | 0.57095 | 0.0847  | 0.13623 | 0       |
| 4930547M16Rik | -6.80607 | 0.00494 | 0.25436 | 0.31207 | 0.34239 | 0.06603 | 0       | 0.09829 |
| Cpne5         | -6.81767 | 0.00239 | 0.03634 | 0.08115 | 0.08904 | 0.05943 | 0.00708 | 0.02949 |
| Ces1e         | -7.31084 | 1.6E-11 | 1.99195 | 2.53191 | 3.15329 | 0.36196 | 0.42696 | 0.48496 |
| AI593442      | -7.36382 | 0.00028 | 0.13479 | 0.2058  | 0.25401 | 0.04082 | 0.01459 | 0.04051 |
| Bex2          | -7.43035 | 5.7E-05 | 1.35206 | 1.32707 | 1.365   | 0.43872 | 0.09409 | 0       |
| Cidec         | -7.48343 | 0.01403 | 0.37589 | 0.60531 | 0.92976 | 0.04269 | 0.18311 | 0.06355 |
| 1700095J03Rik | -7.59899 | 0.00603 | 0.57881 | 0.62138 | 0.6363  | 0.13147 | 0.14098 | 0.06524 |
| Cyp2g1        | -7.62237 | 0.02157 | 0.16262 | 0.27933 | 0.19155 | 0.07388 | 0       | 0       |
| Asgr1         | -7.63629 | 0.00055 | 0.60294 | 0.28245 | 0.67143 | 0.0498  | 0.10681 | 0.07414 |
| Gm14062       | -7.90793 | 0.00555 | 0.12657 | 0.19929 | 0.13914 | 0.01917 | 0.02055 | 0.02853 |
| Mfsd4b5       | -8.12503 | 0.01181 | 0.14469 | 0.11184 | 0.09544 | 0.03944 | 0.07049 | 0.03914 |
| Gm2568        | -8.60391 | 0.01345 | 0.52354 | 0.44964 | 0.91617 | 0       | 0       | 0.30348 |
| Dpy19l2       | -8.62496 | 0.00775 | 0.20269 | 0.1088  | 0.11937 | 0       | 0.04937 | 0       |
| Iqcd          | -8.88702 | 0.002   | 3.21838 | 2.45197 | 2.88585 | 0.80176 | 0.60689 | 1.26377 |
| Cyp2b19       | -8.9259  | 5.6E-06 | 0.2301  | 0.34134 | 0.25624 | 0.07602 | 0.02038 | 0       |

|          |          |         |         |         |         |         |         |         |
|----------|----------|---------|---------|---------|---------|---------|---------|---------|
| Gfy      | -9.83721 | 0.0078  | 0.28299 | 0.28355 | 0.35554 | 0       | 0.04595 | 0.06379 |
| Micalcl  | -10.5048 | 0.01779 | 0.27416 | 0.36389 | 0.68106 | 0.13587 | 0       | 0       |
| Gm16124  | -11.4775 | 0.03716 | 0.67603 | 1.01604 | 0.637   | 0       | 0       | 0.22859 |
| Baiap2l2 | -11.6995 | 0.00123 | 0.22377 | 0.21964 | 0.30122 | 0.02904 | 0       | 0.04324 |
| Chrna9   | -12.1535 | 0.0009  | 0.20174 | 0.22276 | 0.27156 | 0.02618 | 0       | 0.03898 |
| Atp6v1b1 | -12.4553 | 5.7E-11 | 0.6768  | 0.68383 | 1.06913 | 0.01809 | 0.13576 | 0.08077 |
| Gm15889  | -16.2609 | 0.00474 | 1.04681 | 2.00554 | 1.66926 | 0.3658  | 0.47072 | 0.32674 |
| Gm5930   | -19.8138 | 0.00174 | 0.64931 | 0.21448 | 0.65889 | 0.09076 | 0       | 0       |
| Plin1    | -22.5008 | 0.0228  | 0.01876 | 0.25776 | 0.24746 | 0       | 0       | 0.02537 |
| Gm11771  | -48.5818 | 0.01059 | 0.23827 | 0.61391 | 1.12259 | 0       | 0       | 0       |
| Ncam2    | -52.2368 | 0.00257 | 0.05661 | 0.04862 | 0.12002 | 0       | 0       | 0       |
