# Supplementary material for: Transcriptomic Evaluation of Pulmonary Fibrosis-Related Genes: Utilization of Transgenic Mice with Modifying p38 Signal in the Lungs
Source: MDPI journal article supplement (doi:10.3390/ijms21186746), 2020-09-14
Supplement: s1 [file s1]

**Supplementary Table S6.** Transformed expression values in 2,722 genes of the cluster that BLM-induced gene expression was correlated with intrinsic p38 activity in the lungs.

| Name (symbol) | DN     | WT     | CN    |
|---------------|--------|--------|-------|
| 0610007P14Rik | -0.603 | -0.181 | 0.784 |
| 0610010K14Rik | -0.539 | -0.372 | 0.911 |
| 1110008F13Rik | -0.651 | -0.168 | 0.818 |
| 1110012L19Rik | -0.673 | -0.316 | 0.989 |
| 1110038B12Rik | -0.730 | 0.076  | 0.654 |
| 1500009L16Rik | -0.812 | 0.001  | 0.810 |
| 1500011K16Rik | -0.463 | -0.332 | 0.794 |
| 1600014C10Rik | -0.598 | -0.185 | 0.783 |
| 1700017B05Rik | -0.717 | -0.075 | 0.792 |
| 1700027J19Rik | -0.642 | -0.151 | 0.792 |
| 1700056N10Rik | -0.864 | 0.138  | 0.726 |
| 1700086O06Rik | -0.452 | -0.345 | 0.797 |
| 1700123O20Rik | -0.724 | -0.258 | 0.982 |
| 2210013O21Rik | -0.600 | -0.102 | 0.702 |
| 2310009A05Rik | -0.677 | -0.203 | 0.880 |
| 2310057M21Rik | -0.604 | -0.412 | 1.015 |
| 2410006H16Rik | -0.712 | -0.136 | 0.848 |
| 2510002D24Rik | -0.523 | -0.367 | 0.890 |
| 2610001J05Rik | -0.770 | -0.164 | 0.934 |
| 2610002M06Rik | -0.472 | -0.334 | 0.805 |
| 2610021A01Rik | -0.665 | -0.063 | 0.728 |
| 2610301B20Rik | -0.507 | -0.245 | 0.751 |
| 2810002D19Rik | -0.905 | 0.128  | 0.777 |
| 2810004N23Rik | -0.600 | -0.124 | 0.724 |
| 2810428I15Rik | -0.612 | -0.307 | 0.919 |
| 3300002I08Rik | -0.522 | -0.319 | 0.841 |
| 3425401B19Rik | -0.626 | -0.290 | 0.916 |
| 3830406C13Rik | -0.863 | 0.051  | 0.812 |
| 4833439L19Rik | -0.580 | -0.175 | 0.755 |
| 4921513I03Rik | -0.747 | 0.040  | 0.707 |
| 4930430E12Rik | -0.960 | 0.147  | 0.814 |
| 4930453N24Rik | -0.714 | -0.034 | 0.748 |
| 4930539J05Rik | -0.844 | 0.100  | 0.744 |
| 4931406P16Rik | -0.585 | -0.147 | 0.732 |
| 4933421O10Rik | -0.599 | -0.098 | 0.696 |
| 5530601H04Rik | -0.711 | 0.052  | 0.659 |
| 5730405O15Rik | -0.480 | -0.304 | 0.784 |
| 6030408B16Rik | -0.706 | -0.197 | 0.902 |
| 6030445D17Rik | -0.619 | -0.109 | 0.729 |
| 6430548M08Rik | -0.556 | -0.222 | 0.778 |
| 6530409C15Rik | -0.716 | 0.056  | 0.660 |
| 8430419K02Rik | -0.505 | -0.431 | 0.936 |
| 9230110C19Rik | -0.909 | 0.076  | 0.833 |
| 9330102E08Rik | -0.501 | -0.306 | 0.807 |
| 9330182L06Rik | -0.680 | -0.205 | 0.885 |
| 9430016H08Rik | -0.633 | -0.245 | 0.879 |
| 9430020K01Rik | -0.585 | -0.209 | 0.794 |
| A130010J15Rik | -0.621 | -0.245 | 0.867 |
| A430005L14Rik | -0.733 | -0.203 | 0.936 |
| A4galt        | -0.744 | -0.157 | 0.901 |

|               |        |        |       |
|---------------|--------|--------|-------|
| A730020M07Rik | -0.556 | -0.287 | 0.844 |
| A930011G23Rik | -0.579 | -0.169 | 0.748 |
| Aamdc         | -0.528 | -0.395 | 0.924 |
| Aars          | -0.546 | -0.249 | 0.795 |
| Aarsd1        | -0.603 | -0.085 | 0.688 |
| Aasdhppt      | -0.831 | 0.033  | 0.798 |
| Abca6         | -0.459 | -0.345 | 0.804 |
| Abca8a        | -0.595 | -0.326 | 0.921 |
| Abca8b        | -0.703 | -0.274 | 0.976 |
| Abcb1a        | -0.630 | -0.328 | 0.958 |
| Abcb1b        | -0.564 | -0.175 | 0.739 |
| Abcb7         | -0.769 | -0.130 | 0.899 |
| Abcd2         | -0.719 | -0.237 | 0.956 |
| Abcd3         | -0.529 | -0.320 | 0.849 |
| Abcf2         | -0.569 | -0.145 | 0.715 |
| Abhd13        | -0.645 | -0.151 | 0.797 |
| Abhd17c       | -0.594 | -0.130 | 0.724 |
| Abhd4         | -0.607 | -0.190 | 0.797 |
| Abhd5         | -0.588 | -0.307 | 0.895 |
| Abhd6         | -0.538 | -0.235 | 0.773 |
| Abi1          | -0.786 | -0.170 | 0.956 |
| Abi2          | -0.740 | -0.141 | 0.881 |
| Abrac1        | -0.664 | -0.106 | 0.770 |
| Acaa2         | -0.535 | -0.381 | 0.915 |
| Acaca         | -0.516 | -0.264 | 0.780 |
| Acad1         | -0.752 | -0.197 | 0.950 |
| Acadv1        | -0.610 | -0.107 | 0.717 |
| Acap2         | -0.597 | -0.165 | 0.762 |
| Acbd6         | -0.714 | -0.119 | 0.833 |
| Acer2         | -0.720 | -0.011 | 0.731 |
| Acer3         | -0.881 | -0.014 | 0.895 |
| Ackr2         | -0.878 | -0.007 | 0.885 |
| Acly          | -0.637 | -0.202 | 0.839 |
| Aco2          | -0.548 | -0.257 | 0.806 |
| Acot11        | -0.525 | -0.198 | 0.723 |
| Acot13        | -0.530 | -0.289 | 0.819 |
| Acot2         | -0.483 | -0.271 | 0.754 |
| Acp2          | -0.681 | -0.073 | 0.754 |
| Acsl4         | -0.690 | -0.254 | 0.943 |
| Acta2         | -0.534 | -0.348 | 0.882 |
| Actg1         | -0.750 | -0.159 | 0.909 |
| Actl6a        | -0.647 | -0.259 | 0.906 |
| Actn1         | -0.712 | -0.141 | 0.854 |
| Actn4         | -0.740 | -0.226 | 0.966 |
| Actr2         | -0.748 | -0.172 | 0.920 |
| Actr3         | -0.611 | -0.073 | 0.683 |
| Actr6         | -0.737 | 0.044  | 0.693 |
| Acvr2a        | -0.644 | -0.056 | 0.700 |
| Acyp1         | -0.854 | -0.035 | 0.890 |
| Acyp2         | -0.733 | -0.117 | 0.850 |
| Adam10        | -0.800 | -0.100 | 0.900 |
| Adam12        | -0.702 | 0.030  | 0.672 |
| Adam15        | -0.744 | -0.023 | 0.767 |
| Adam17        | -0.639 | -0.181 | 0.819 |
| Adam9         | -0.641 | -0.157 | 0.798 |
| Adamts15      | -0.831 | -0.109 | 0.939 |

|          |        |        |       |
|----------|--------|--------|-------|
| Adamts9  | -0.760 | 0.002  | 0.759 |
| Add3     | -0.572 | -0.236 | 0.807 |
| Adgrd1   | -0.683 | -0.302 | 0.986 |
| Adgrg6   | -0.605 | -0.080 | 0.685 |
| Adh1     | -0.483 | -0.322 | 0.805 |
| Adhfe1   | -0.536 | -0.183 | 0.719 |
| Adipor2  | -0.686 | -0.109 | 0.795 |
| Adk      | -0.616 | -0.334 | 0.950 |
| Adprh    | -0.494 | -0.249 | 0.743 |
| Adprm    | -0.681 | -0.271 | 0.952 |
| Adra2b   | -0.784 | -0.118 | 0.902 |
| Adrb2    | -0.693 | -0.116 | 0.808 |
| Adrm1    | -0.594 | -0.119 | 0.714 |
| Aes      | -0.703 | -0.206 | 0.909 |
| Aff1     | -0.637 | -0.133 | 0.769 |
| Aff2     | -1.069 | 0.223  | 0.846 |
| Aff3     | -0.582 | -0.208 | 0.790 |
| Aff4     | -0.744 | -0.155 | 0.899 |
| Afmid    | -0.947 | 0.183  | 0.764 |
| Aga      | -0.614 | -0.196 | 0.810 |
| Agfg1    | -0.633 | -0.149 | 0.781 |
| Agpat4   | -0.752 | -0.149 | 0.901 |
| Agpat5   | -0.678 | -0.107 | 0.785 |
| Agpat9   | -0.785 | -0.061 | 0.846 |
| Agps     | -0.662 | -0.106 | 0.768 |
| Ahcy     | -0.686 | -0.310 | 0.996 |
| Ahcy1    | -0.571 | -0.195 | 0.766 |
| Ahsa1    | -0.609 | -0.137 | 0.746 |
| AI413582 | -0.595 | -0.254 | 0.849 |
| AI504432 | -0.556 | -0.417 | 0.973 |
| AI597479 | -0.485 | -0.273 | 0.758 |
| AI661453 | -0.455 | -0.325 | 0.779 |
| AI837181 | -0.660 | -0.248 | 0.907 |
| AI987944 | -0.658 | -0.156 | 0.814 |
| Aida     | -0.695 | -0.162 | 0.857 |
| Aip      | -0.471 | -0.337 | 0.808 |
| Ak3      | -0.520 | -0.231 | 0.750 |
| Ak6      | -0.693 | -0.301 | 0.994 |
| Akap11   | -0.572 | -0.134 | 0.706 |
| Akirin2  | -0.611 | -0.070 | 0.681 |
| Akr1b3   | -0.582 | -0.300 | 0.882 |
| Akr1e1   | -0.545 | -0.210 | 0.754 |
| Alas2    | -0.598 | -0.352 | 0.950 |
| Alcam    | -0.519 | -0.215 | 0.734 |
| Aldh18a1 | -0.684 | -0.063 | 0.747 |
| Aldh6a1  | -0.589 | -0.481 | 1.070 |
| Aldh9a1  | -0.568 | -0.189 | 0.757 |
| Aldoa    | -0.663 | -0.282 | 0.945 |
| Alg14    | -0.698 | -0.120 | 0.818 |
| Alg3     | -0.620 | -0.274 | 0.894 |
| Alg8     | -0.622 | -0.064 | 0.686 |
| Alox5    | -0.570 | -0.449 | 1.020 |
| Alyref   | -0.615 | -0.222 | 0.837 |
| Amica1   | -0.734 | 0.012  | 0.722 |
| Ammecr1  | -0.665 | 0.016  | 0.649 |
| Anapc10  | -0.486 | -0.384 | 0.870 |

|          |        |        |       |
|----------|--------|--------|-------|
| Anapc16  | -0.699 | -0.037 | 0.735 |
| Ang      | -0.722 | -0.134 | 0.856 |
| Angptl2  | -0.577 | -0.250 | 0.827 |
| Ankrd13a | -0.568 | -0.264 | 0.832 |
| Ankrd34a | -0.885 | 0.109  | 0.776 |
| Ankrd49  | -0.699 | -0.071 | 0.770 |
| Ankrd55  | -0.645 | -0.117 | 0.762 |
| Anln     | -0.578 | -0.186 | 0.764 |
| Ano10    | -0.573 | -0.137 | 0.710 |
| Anpep    | -0.617 | -0.201 | 0.818 |
| Anxa4    | -0.540 | -0.232 | 0.772 |
| Anxa5    | -0.578 | -0.264 | 0.843 |
| Ap1s3    | -0.839 | 0.088  | 0.751 |
| Ap2a2    | -0.608 | -0.092 | 0.700 |
| Ap2m1    | -0.635 | -0.280 | 0.916 |
| Ap5m1    | -0.842 | 0.049  | 0.793 |
| Apbb1ip  | -0.532 | -0.179 | 0.711 |
| Apex1    | -0.745 | -0.182 | 0.928 |
| Apol9a   | -0.496 | -0.370 | 0.866 |
| Apold1   | -0.571 | -0.180 | 0.751 |
| Apool    | -0.697 | -0.327 | 1.024 |
| App      | -0.623 | -0.205 | 0.828 |
| Appbp2   | -0.680 | -0.088 | 0.768 |
| Aqp5     | -0.558 | -0.279 | 0.837 |
| Arcn1    | -0.713 | -0.214 | 0.927 |
| Arf1     | -0.623 | -0.264 | 0.887 |
| Arf2     | -0.603 | -0.089 | 0.693 |
| Arfgap3  | -0.581 | -0.230 | 0.811 |
| Arfip1   | -0.546 | -0.224 | 0.770 |
| Arhgap1  | -0.590 | -0.163 | 0.754 |
| Arhgap29 | -0.557 | -0.211 | 0.768 |
| Arhgap31 | -0.656 | -0.176 | 0.833 |
| Arhgap5  | -0.511 | -0.217 | 0.729 |
| Arhgdia  | -0.724 | -0.243 | 0.967 |
| Arhgef3  | -0.597 | -0.228 | 0.825 |
| Arl1     | -0.685 | -0.259 | 0.944 |
| Arl3     | -0.528 | -0.355 | 0.883 |
| Arl5b    | -0.570 | -0.182 | 0.752 |
| Arl6ip5  | -0.639 | -0.162 | 0.801 |
| Arl6ip6  | -0.633 | -0.096 | 0.729 |
| Arl8a    | -0.665 | -0.131 | 0.795 |
| Arl8b    | -0.718 | -0.119 | 0.837 |
| Armc1    | -0.712 | -0.272 | 0.984 |
| Armcx6   | -0.514 | -0.256 | 0.770 |
| Arpc1a   | -0.554 | -0.202 | 0.756 |
| Arpc1b   | -0.738 | -0.132 | 0.870 |
| Arpc4    | -0.721 | -0.181 | 0.902 |
| Arrdc3   | -0.644 | -0.218 | 0.862 |
| Arsa     | -0.660 | -0.121 | 0.782 |
| Arsg     | -0.779 | -0.030 | 0.809 |
| Art4     | -0.736 | -0.129 | 0.865 |
| Asah2    | -0.681 | -0.130 | 0.811 |
| Asna1    | -0.721 | -0.167 | 0.888 |
| Ass1     | -0.593 | -0.124 | 0.717 |
| Atad1    | -0.701 | -0.205 | 0.906 |
| Atad3aos | -0.463 | -0.376 | 0.839 |

|               |        |        |       |
|---------------|--------|--------|-------|
| Ate1          | -0.524 | -0.198 | 0.722 |
| Atf2          | -0.604 | -0.088 | 0.691 |
| Atf6          | -0.672 | -0.184 | 0.856 |
| Atg10         | -0.606 | -0.139 | 0.745 |
| Atg3          | -0.682 | -0.109 | 0.791 |
| Atg4a         | -0.492 | -0.341 | 0.833 |
| Atl2          | -0.662 | -0.053 | 0.715 |
| Atl3          | -0.554 | -0.150 | 0.704 |
| Atp11c        | -0.619 | -0.118 | 0.737 |
| Atp1a1        | -0.664 | -0.207 | 0.871 |
| Atp1a3        | -0.711 | -0.122 | 0.834 |
| Atp1b1        | -0.494 | -0.348 | 0.842 |
| Atp1b3        | -0.698 | -0.092 | 0.790 |
| Atp5b         | -0.557 | -0.317 | 0.874 |
| Atp5d         | -0.596 | -0.285 | 0.881 |
| Atp5g3        | -0.686 | -0.194 | 0.879 |
| Atp6ap1       | -0.720 | -0.196 | 0.916 |
| Atp6ap2       | -0.801 | -0.167 | 0.968 |
| Atp6v0d1      | -0.714 | -0.235 | 0.949 |
| Atp6v1a       | -0.650 | -0.193 | 0.843 |
| Atp6v1c1      | -0.625 | -0.158 | 0.783 |
| Atp6v1e1      | -0.675 | -0.268 | 0.942 |
| Atp6v1f       | -0.701 | -0.181 | 0.882 |
| Atp7a         | -0.602 | -0.147 | 0.749 |
| Atp8b1        | -0.661 | 0.012  | 0.649 |
| Atraid        | -0.653 | -0.238 | 0.891 |
| Atrn          | -0.599 | -0.191 | 0.789 |
| Atxn10        | -0.571 | -0.226 | 0.797 |
| AU021092      | -0.561 | -0.370 | 0.930 |
| Aurka         | -0.620 | -0.169 | 0.788 |
| Avpr1a        | -0.772 | 0.002  | 0.771 |
| AW112010      | -0.849 | -0.056 | 0.906 |
| AW549877      | -0.571 | -0.215 | 0.786 |
| B230118H07Rik | -0.456 | -0.358 | 0.813 |
| B3galnt1      | -0.662 | -0.364 | 1.025 |
| B3glct        | -0.652 | -0.080 | 0.732 |
| B3gnt2        | -0.537 | -0.187 | 0.724 |
| B3gnt3        | -0.699 | -0.256 | 0.955 |
| B4galt1       | -0.747 | -0.132 | 0.878 |
| Bag1          | -0.539 | -0.214 | 0.753 |
| Bag3          | -0.705 | -0.151 | 0.856 |
| Bag5          | -0.674 | -0.163 | 0.837 |
| Basp1         | -0.706 | -0.022 | 0.728 |
| Batf          | -0.792 | -0.099 | 0.891 |
| Bbs5          | -0.684 | -0.048 | 0.732 |
| BC004004      | -0.599 | -0.200 | 0.800 |
| BC028528      | -0.766 | -0.060 | 0.826 |
| BC029722      | -0.704 | -0.111 | 0.815 |
| BC031181      | -0.547 | -0.317 | 0.864 |
| Bcam          | -0.536 | -0.298 | 0.834 |
| Bcap29        | -0.768 | -0.148 | 0.916 |
| Bcap31        | -0.634 | -0.306 | 0.940 |
| Bcar3         | -0.769 | -0.026 | 0.795 |
| Bckdha        | -0.710 | -0.122 | 0.833 |
| Bcl10         | -0.630 | -0.112 | 0.742 |
| Bcl2a1a       | -0.933 | 0.107  | 0.825 |

|         |        |        |       |
|---------|--------|--------|-------|
| Bcs1l   | -0.996 | 0.137  | 0.859 |
| Bdnf    | -0.607 | -0.071 | 0.678 |
| Bend3   | -0.591 | -0.132 | 0.723 |
| Best1   | -0.581 | -0.393 | 0.974 |
| Bet1    | -0.799 | -0.077 | 0.876 |
| Bet1l   | -0.706 | -0.226 | 0.932 |
| Bex4    | -0.594 | -0.364 | 0.958 |
| Bhlhe40 | -0.543 | -0.205 | 0.748 |
| Bicc1   | -0.515 | -0.396 | 0.911 |
| Bicd1   | -0.451 | -0.321 | 0.773 |
| Birc3   | -0.701 | 0.026  | 0.675 |
| Bivm    | -0.558 | -0.183 | 0.741 |
| Blm     | -0.627 | -0.138 | 0.765 |
| Bloc1s1 | -0.606 | -0.404 | 1.010 |
| Bloc1s5 | -0.593 | -0.155 | 0.748 |
| Bloc1s6 | -0.593 | -0.132 | 0.725 |
| Blzf1   | -0.618 | -0.214 | 0.832 |
| Bmi1    | -0.678 | -0.119 | 0.797 |
| Bmp5    | -0.605 | -0.335 | 0.940 |
| Bmpr1a  | -0.603 | -0.224 | 0.827 |
| Bnip3l  | -0.585 | -0.123 | 0.708 |
| Borcs8  | -0.638 | -0.128 | 0.766 |
| Bpnt1   | -0.664 | -0.329 | 0.993 |
| Brcc3   | -0.739 | -0.060 | 0.799 |
| Bre     | -0.583 | -0.220 | 0.803 |
| Brox    | -0.784 | -0.122 | 0.907 |
| Bsg     | -0.534 | -0.325 | 0.859 |
| Btbd1   | -0.685 | -0.139 | 0.823 |
| Btf3    | -0.648 | -0.245 | 0.892 |
| Btf3l4  | -0.594 | -0.337 | 0.932 |
| Btg1    | -0.685 | 0.031  | 0.655 |
| Bub1    | -0.728 | -0.140 | 0.868 |
| Bub3    | -0.587 | -0.379 | 0.966 |
| Bysl    | -0.618 | -0.245 | 0.863 |
| Bzw1    | -0.782 | -0.114 | 0.896 |
| Bzw2    | -0.555 | -0.228 | 0.783 |
| C1galt1 | -0.579 | -0.225 | 0.805 |
| C1qa    | -0.839 | -0.048 | 0.887 |
| C1qb    | -0.832 | -0.030 | 0.863 |
| C1qbp   | -0.667 | -0.266 | 0.933 |
| C1qtnf1 | -0.465 | -0.315 | 0.780 |
| C1qtnf2 | -0.677 | -0.144 | 0.821 |
| C4b     | -0.515 | -0.351 | 0.865 |
| C5ar2   | -1.013 | 0.167  | 0.846 |
| Cab39   | -0.714 | -0.194 | 0.908 |
| Cacul1  | -0.687 | -0.125 | 0.812 |
| Cacybp  | -0.657 | -0.144 | 0.801 |
| Cadm3   | -0.756 | -0.154 | 0.910 |
| Cald1   | -0.716 | -0.094 | 0.810 |
| Calhm2  | -0.712 | -0.025 | 0.737 |
| Calm1   | -0.722 | -0.262 | 0.984 |
| Calm2   | -0.674 | -0.360 | 1.034 |
| Calr    | -0.722 | -0.169 | 0.891 |
| Canx    | -0.686 | -0.147 | 0.833 |
| Capn2   | -0.657 | -0.196 | 0.854 |
| Capn5   | -0.738 | -0.023 | 0.761 |

|          |        |        |       |
|----------|--------|--------|-------|
| Caprin1  | -0.806 | -0.124 | 0.931 |
| Capzb    | -0.663 | -0.221 | 0.883 |
| Car2     | -0.704 | -0.227 | 0.931 |
| Car5b    | -0.628 | -0.257 | 0.886 |
| Card19   | -0.662 | -0.208 | 0.870 |
| Carnmt1  | -0.677 | -0.202 | 0.879 |
| Casc4    | -0.525 | -0.277 | 0.801 |
| Cask     | -0.589 | -0.187 | 0.776 |
| Caskin2  | -0.569 | -0.146 | 0.715 |
| Casp4    | -0.523 | -0.293 | 0.816 |
| Cass4    | -0.596 | -0.174 | 0.770 |
| Cast     | -0.599 | -0.154 | 0.753 |
| Cbfb     | -0.645 | -0.143 | 0.787 |
| Cblb     | -0.675 | -0.010 | 0.685 |
| Cbl11    | -0.689 | -0.135 | 0.824 |
| Cbx3     | -0.494 | -0.286 | 0.780 |
| Cbx6     | -0.490 | -0.258 | 0.748 |
| Ccdc109b | -0.692 | -0.252 | 0.945 |
| Ccdc115  | -0.581 | -0.232 | 0.813 |
| Ccdc124  | -0.472 | -0.299 | 0.771 |
| Ccdc127  | -0.571 | -0.162 | 0.734 |
| Ccdc186  | -0.650 | -0.137 | 0.787 |
| Ccdc32   | -0.602 | -0.107 | 0.709 |
| Ccdc42   | -0.639 | -0.199 | 0.838 |
| Ccdc47   | -0.609 | -0.333 | 0.941 |
| Ccdc53   | -0.535 | -0.191 | 0.726 |
| Ccdc58   | -0.728 | -0.093 | 0.820 |
| Ccdc68   | -0.630 | -0.075 | 0.705 |
| Ccdc711  | -0.676 | 0.018  | 0.657 |
| Ccdc86   | -0.695 | -0.224 | 0.918 |
| Ccdc90b  | -0.747 | -0.117 | 0.864 |
| Ccna2    | -0.701 | -0.107 | 0.808 |
| Ccnb1    | -0.536 | -0.385 | 0.921 |
| Ccnc     | -0.613 | -0.119 | 0.732 |
| Ccne1    | -0.749 | -0.059 | 0.808 |
| Ccne2    | -0.725 | -0.065 | 0.790 |
| Ccng1    | -0.571 | -0.229 | 0.800 |
| Ccnh     | -0.657 | -0.114 | 0.770 |
| Ccny     | -0.789 | -0.150 | 0.939 |
| Cct2     | -0.607 | -0.220 | 0.827 |
| Cct3     | -0.691 | -0.261 | 0.953 |
| Cct4     | -0.659 | -0.145 | 0.805 |
| Cct5     | -0.691 | -0.204 | 0.895 |
| Cct6a    | -0.660 | -0.149 | 0.809 |
| Cct7     | -0.536 | -0.176 | 0.712 |
| Cct8     | -0.755 | -0.169 | 0.924 |
| Ccz1     | -0.585 | -0.217 | 0.802 |
| Cd101    | -0.635 | -0.094 | 0.729 |
| Cd200r4  | -0.829 | 0.041  | 0.788 |
| Cd300a   | -0.688 | 0.032  | 0.656 |
| Cd300lf  | -0.596 | -0.152 | 0.748 |
| Cd38     | -0.730 | -0.057 | 0.788 |
| Cd3eap   | -0.840 | -0.018 | 0.858 |
| Cd46     | -0.651 | -0.337 | 0.989 |
| Cd47     | -0.753 | -0.191 | 0.944 |
| Cd48     | -0.657 | -0.026 | 0.682 |

|          |        |        |       |
|----------|--------|--------|-------|
| Cd63     | -0.751 | -0.159 | 0.910 |
| Cd81     | -0.770 | -0.177 | 0.946 |
| Cdc27    | -0.683 | -0.163 | 0.846 |
| Cdc42    | -0.630 | -0.135 | 0.764 |
| Cdc42bpa | -0.537 | -0.186 | 0.723 |
| Cdc42ep1 | -0.627 | -0.168 | 0.795 |
| Cdc42ep4 | -0.763 | 0.016  | 0.747 |
| Cdca3    | -0.664 | -0.109 | 0.773 |
| Cdcp1    | -0.616 | -0.194 | 0.810 |
| Cdh13    | -0.629 | -0.296 | 0.925 |
| Cdk1     | -0.703 | 0.028  | 0.675 |
| Cdk19    | -0.564 | -0.172 | 0.736 |
| Cdk2ap2  | -0.685 | -0.214 | 0.898 |
| Cdkn2d   | -0.457 | -0.316 | 0.773 |
| Cdr2     | -0.565 | -0.229 | 0.794 |
| Cebpb    | -0.671 | -0.152 | 0.823 |
| Cebpz    | -0.584 | -0.127 | 0.712 |
| Celf2    | -0.732 | -0.036 | 0.768 |
| Cenph    | -0.499 | -0.240 | 0.738 |
| Cenpl    | -0.512 | -0.222 | 0.734 |
| Cenpq    | -0.549 | -0.227 | 0.776 |
| Cep170   | -0.672 | -0.017 | 0.689 |
| Cep41    | -0.866 | 0.029  | 0.836 |
| Cers2    | -0.735 | -0.251 | 0.986 |
| Cers6    | -0.831 | -0.087 | 0.918 |
| Ces1d    | -0.465 | -0.375 | 0.840 |
| Cetn3    | -0.595 | -0.180 | 0.775 |
| Cfap97   | -0.603 | -0.118 | 0.721 |
| Cfl2     | -0.757 | -0.143 | 0.900 |
| Cflar    | -0.612 | -0.104 | 0.716 |
| Chchd1   | -0.699 | -0.075 | 0.774 |
| Chchd4   | -0.691 | -0.098 | 0.789 |
| Chchd7   | -0.676 | -0.091 | 0.767 |
| Chm      | -0.641 | -0.316 | 0.957 |
| Chmp2a   | -0.482 | -0.316 | 0.798 |
| Chmp2b   | -0.653 | -0.174 | 0.827 |
| Chmp3    | -0.532 | -0.224 | 0.755 |
| Chmp5    | -0.605 | -0.191 | 0.796 |
| Chp1     | -0.790 | -0.159 | 0.950 |
| Chpt1    | -0.743 | -0.125 | 0.868 |
| Chrac1   | -0.559 | -0.249 | 0.808 |
| Chrnbl   | -0.669 | 0.017  | 0.653 |
| Chst11   | -0.823 | -0.089 | 0.912 |
| Chsy1    | -0.786 | -0.053 | 0.839 |
| Chtf8    | -0.572 | -0.150 | 0.722 |
| Churc1   | -0.607 | -0.303 | 0.909 |
| Cib2     | -0.690 | -0.032 | 0.723 |
| Cinp     | -0.695 | -0.265 | 0.960 |
| Cirh1a   | -0.711 | -0.202 | 0.914 |
| Cisd1    | -0.599 | -0.107 | 0.706 |
| Cisd3    | -0.651 | -0.217 | 0.868 |
| Ckap4    | -0.627 | -0.078 | 0.705 |
| Cks1b    | -0.580 | -0.215 | 0.795 |
| Clcc1    | -0.539 | -0.195 | 0.733 |
| Clcn5    | -0.672 | -0.096 | 0.768 |
| Cldn10   | -0.485 | -0.352 | 0.837 |



|          |        |        |       |
|----------|--------|--------|-------|
| Cldn15   | -0.639 | -0.085 | 0.724 |
| Cldn23   | -0.543 | -0.164 | 0.707 |
| Cldn34c1 | -0.918 | 0.084  | 0.834 |
| Cldn6    | -0.623 | -0.152 | 0.775 |
| Cldnd1   | -0.670 | -0.192 | 0.862 |
| Clec11a  | -0.491 | -0.264 | 0.755 |
| Clec12a  | -0.762 | -0.095 | 0.856 |
| Clec14a  | -0.489 | -0.315 | 0.804 |
| Clec4a1  | -0.794 | -0.010 | 0.804 |
| Clec5a   | -0.690 | -0.123 | 0.813 |
| Clec7a   | -0.735 | 0.070  | 0.665 |
| Clic1    | -0.790 | -0.125 | 0.914 |
| Clic5    | -0.558 | -0.309 | 0.867 |
| Clint1   | -0.647 | -0.111 | 0.758 |
| Clmp     | -0.619 | -0.280 | 0.899 |
| Cln5     | -0.667 | -0.290 | 0.957 |
| Cln6     | -0.478 | -0.366 | 0.844 |
| Clock    | -0.761 | -0.176 | 0.937 |
| Clp1     | -0.816 | 0.013  | 0.803 |
| Clpp     | -0.659 | -0.135 | 0.794 |
| Clptm1   | -0.825 | -0.113 | 0.939 |
| Clptm1l  | -0.589 | -0.158 | 0.747 |
| Cltb     | -0.545 | -0.226 | 0.771 |
| Cltc     | -0.736 | -0.249 | 0.985 |
| Clybl    | -0.662 | -0.088 | 0.751 |
| Cmc4     | -0.728 | -0.001 | 0.730 |
| Cmklr1   | -0.708 | -0.198 | 0.906 |
| Cmpk1    | -0.789 | -0.023 | 0.812 |
| Cmtm3    | -0.632 | -0.075 | 0.707 |
| Cnbp     | -0.575 | -0.188 | 0.764 |
| Cndp2    | -0.580 | -0.302 | 0.882 |
| Cnep1r1  | -0.731 | -0.047 | 0.778 |
| Cnih1    | -0.711 | -0.139 | 0.850 |
| Cnih4    | -0.699 | -0.207 | 0.906 |
| Cnn2     | -0.660 | -0.279 | 0.939 |
| Cnot11   | -0.613 | -0.159 | 0.772 |
| Cnot2    | -0.551 | -0.261 | 0.812 |
| Cnot6    | -0.631 | -0.082 | 0.712 |
| Cnot6l   | -0.628 | -0.057 | 0.685 |
| Cnpy2    | -0.582 | -0.167 | 0.749 |
| Cnrip1   | -0.553 | -0.243 | 0.797 |
| Coa4     | -0.644 | -0.123 | 0.767 |
| Coa5     | -0.604 | -0.086 | 0.690 |
| Coa6     | -0.691 | -0.338 | 1.029 |
| Cobll1   | -0.592 | -0.108 | 0.700 |
| Cog5     | -0.559 | -0.177 | 0.736 |
| Col12a1  | -0.861 | -0.051 | 0.913 |
| Col23a1  | -0.636 | -0.297 | 0.933 |
| Col4a1   | -0.668 | -0.085 | 0.752 |
| Col4a2   | -0.684 | -0.109 | 0.793 |
| Col6a1   | -0.586 | -0.194 | 0.780 |
| Col6a2   | -0.620 | -0.160 | 0.780 |
| Col6a3   | -0.645 | -0.200 | 0.845 |
| Col6a5   | -0.766 | 0.059  | 0.707 |
| Commmd10 | -0.482 | -0.352 | 0.834 |
| Commmd3  | -0.611 | -0.216 | 0.828 |

|            |        |        |       |
|------------|--------|--------|-------|
| Commd6     | -0.603 | -0.241 | 0.844 |
| Commd9     | -0.534 | -0.183 | 0.717 |
| Comt       | -0.702 | -0.120 | 0.822 |
| Copb2      | -0.632 | -0.257 | 0.889 |
| Cope       | -0.604 | -0.090 | 0.694 |
| Copg1      | -0.588 | -0.132 | 0.719 |
| Cops3      | -0.537 | -0.300 | 0.836 |
| Cops4      | -0.650 | -0.196 | 0.846 |
| Cops5      | -0.584 | -0.222 | 0.806 |
| Cops6      | -0.755 | -0.203 | 0.958 |
| Coq6       | -0.745 | -0.092 | 0.837 |
| Coq9       | -0.562 | -0.148 | 0.710 |
| Coro1b     | -0.575 | -0.137 | 0.712 |
| Coro1c     | -0.563 | -0.161 | 0.723 |
| Coro2b     | -0.586 | -0.132 | 0.719 |
| Cotl1      | -0.720 | -0.155 | 0.874 |
| Cox19      | -0.531 | -0.192 | 0.723 |
| Cox4i2     | -0.502 | -0.239 | 0.741 |
| Cox5a      | -0.654 | -0.262 | 0.916 |
| Cox6c      | -0.611 | -0.320 | 0.931 |
| Cpd        | -0.657 | -0.204 | 0.861 |
| Cpne3      | -0.778 | -0.159 | 0.937 |
| Cpne8      | -0.738 | -0.114 | 0.852 |
| Cpped1     | -0.537 | -0.182 | 0.719 |
| Cpsf3      | -0.538 | -0.171 | 0.710 |
| Cpt1a      | -0.775 | -0.176 | 0.951 |
| Cpt2       | -0.630 | -0.104 | 0.735 |
| Cr1l       | -0.694 | -0.108 | 0.802 |
| Crat       | -0.557 | -0.239 | 0.796 |
| Crbn       | -0.687 | -0.168 | 0.854 |
| Crebbp     | -0.603 | -0.092 | 0.695 |
| Creg1      | -0.476 | -0.303 | 0.779 |
| Crem       | -0.843 | -0.065 | 0.908 |
| Crip2      | -0.488 | -0.313 | 0.801 |
| Cript      | -0.703 | -0.226 | 0.929 |
| Crk        | -0.612 | -0.095 | 0.707 |
| Crls1      | -0.654 | -0.234 | 0.889 |
| Crtap      | -0.594 | -0.290 | 0.883 |
| Cry1       | -0.618 | -0.168 | 0.786 |
| Crybg3_1   | -0.580 | -0.179 | 0.759 |
| Csde1      | -0.651 | -0.191 | 0.843 |
| Csf1       | -0.614 | -0.157 | 0.771 |
| Csgalnact1 | -0.719 | -0.079 | 0.798 |
| Csnk2b     | -0.690 | -0.208 | 0.898 |
| Csrp1      | -0.552 | -0.257 | 0.810 |
| Cstf2      | -0.527 | -0.244 | 0.771 |
| Ctbp2      | -0.615 | -0.065 | 0.681 |
| Ctla4      | -0.654 | 0.002  | 0.652 |
| Ctnna1     | -0.700 | -0.298 | 0.998 |
| Ctnnb1     | -0.670 | -0.327 | 0.997 |
| Ctnnd1     | -0.630 | -0.072 | 0.703 |
| Ctsa       | -0.616 | -0.112 | 0.729 |
| Ctsc       | -0.683 | -0.177 | 0.860 |
| Ctse       | -0.580 | -0.194 | 0.773 |
| Ctsh       | -0.605 | -0.115 | 0.720 |
| Ctsk       | -0.707 | -0.298 | 1.005 |

|            |        |        |       |
|------------|--------|--------|-------|
| Ctss       | -0.656 | -0.015 | 0.672 |
| Ctsz       | -0.667 | -0.170 | 0.837 |
| Cttnbp2nl  | -0.792 | -0.055 | 0.847 |
| Cubn       | -0.793 | 0.054  | 0.739 |
| Cul3       | -0.653 | -0.118 | 0.771 |
| Cul4b      | -0.689 | -0.150 | 0.839 |
| Cul5       | -0.698 | -0.115 | 0.813 |
| Cwc15      | -0.581 | -0.223 | 0.805 |
| Cxcr4      | -0.660 | -0.103 | 0.763 |
| Cyb5r3     | -0.576 | -0.149 | 0.725 |
| Cyb5r4     | -0.642 | -0.120 | 0.762 |
| Cyba       | -0.656 | -0.254 | 0.910 |
| Cyc1       | -0.581 | -0.158 | 0.739 |
| Cyfp1      | -0.651 | -0.243 | 0.894 |
| Cyp2d22    | -0.551 | -0.407 | 0.958 |
| Cyp2j6     | -0.614 | -0.153 | 0.767 |
| Cyp2u1     | -0.566 | -0.230 | 0.796 |
| Cyp51      | -0.658 | -0.114 | 0.773 |
| Cyth3      | -0.580 | -0.188 | 0.768 |
| Cytip      | -0.778 | -0.009 | 0.788 |
| Cyyr1      | -0.771 | -0.172 | 0.943 |
| D3Ertd254e | -0.543 | -0.252 | 0.794 |
| D8Ertd738e | -0.615 | -0.202 | 0.818 |
| Daam1      | -0.551 | -0.163 | 0.714 |
| Dad1       | -0.628 | -0.240 | 0.868 |
| Dag1       | -0.592 | -0.138 | 0.730 |
| Dars       | -0.573 | -0.287 | 0.860 |
| Dbr1       | -0.735 | -0.147 | 0.882 |
| Dbt        | -0.627 | -0.264 | 0.891 |
| Dcaf10     | -0.629 | -0.124 | 0.753 |
| Dcaf13     | -0.569 | -0.187 | 0.756 |
| Dchs1      | -0.623 | -0.045 | 0.669 |
| Dclre1b    | -0.736 | -0.126 | 0.861 |
| Dctd       | -0.679 | -0.249 | 0.928 |
| Dctn4      | -0.635 | -0.215 | 0.850 |
| Dctn6      | -0.629 | -0.149 | 0.778 |
| Dcun1d1    | -0.598 | -0.219 | 0.817 |
| Dda1       | -0.625 | -0.182 | 0.808 |
| Ddah1      | -0.698 | -0.205 | 0.902 |
| Ddb1       | -0.682 | -0.211 | 0.893 |
| Ddias      | -0.528 | -0.321 | 0.849 |
| Ddit3      | -0.750 | -0.008 | 0.758 |
| Ddit4      | -0.782 | -0.006 | 0.788 |
| Ddost      | -0.737 | -0.239 | 0.975 |
| Ddx1       | -0.641 | -0.243 | 0.883 |
| Ddx18      | -0.582 | -0.141 | 0.722 |
| Ddx21      | -0.742 | -0.207 | 0.950 |
| Ddx6       | -0.609 | -0.112 | 0.720 |
| Deb1       | -0.677 | -0.027 | 0.704 |
| Def8       | -0.625 | -0.160 | 0.786 |
| Dennd4a    | -0.673 | -0.045 | 0.718 |
| Dennd4c    | -0.608 | -0.166 | 0.774 |
| Depdc1a    | -0.790 | 0.034  | 0.756 |
| Deptor     | -0.580 | -0.199 | 0.779 |
| Dera       | -0.718 | -0.033 | 0.751 |
| Derl1      | -0.615 | -0.176 | 0.791 |

|               |        |        |       |
|---------------|--------|--------|-------|
| Desi2         | -0.677 | -0.100 | 0.777 |
| Dhcr7         | -0.576 | -0.131 | 0.707 |
| Dhdh          | -0.497 | -0.266 | 0.763 |
| Dhx29         | -0.543 | -0.301 | 0.844 |
| Dhx40         | -0.705 | -0.196 | 0.901 |
| Dhx9          | -0.614 | -0.106 | 0.720 |
| Disp2         | -0.750 | -0.155 | 0.905 |
| Dkc1          | -0.672 | -0.183 | 0.855 |
| Dkk3          | -0.584 | -0.125 | 0.709 |
| Dlat          | -0.603 | -0.134 | 0.738 |
| Dld           | -0.812 | -0.150 | 0.962 |
| Dll1          | -0.792 | -0.049 | 0.841 |
| Dmxl2         | -0.604 | -0.141 | 0.744 |
| Dnaja2        | -0.660 | -0.129 | 0.789 |
| Dnaja3        | -0.546 | -0.240 | 0.786 |
| Dnajib1       | -0.644 | -0.055 | 0.699 |
| Dnajib11      | -0.707 | -0.191 | 0.898 |
| Dnajib13      | -0.712 | -0.031 | 0.743 |
| Dnajib4       | -0.663 | -0.196 | 0.858 |
| Dnajc15       | -0.707 | -0.214 | 0.921 |
| Dnajc25       | -0.850 | 0.033  | 0.817 |
| Dnajc3        | -0.568 | -0.226 | 0.794 |
| Dnajc6        | -0.813 | 0.049  | 0.764 |
| Dnm1l         | -0.769 | -0.145 | 0.914 |
| Dpep2         | -0.707 | -0.009 | 0.715 |
| Dph3          | -0.755 | -0.139 | 0.894 |
| Dph5          | -0.641 | -0.121 | 0.763 |
| Dph6          | -0.646 | -0.154 | 0.799 |
| Dpm2          | -0.561 | -0.438 | 0.999 |
| Dpy19l1       | -0.626 | -0.209 | 0.835 |
| Dpy30         | -0.627 | -0.296 | 0.923 |
| Dpysl2        | -0.497 | -0.289 | 0.785 |
| Dpysl3        | -0.590 | -0.185 | 0.775 |
| Dpysl5        | -0.671 | -0.180 | 0.851 |
| Dr1           | -0.712 | -0.074 | 0.786 |
| Drap1         | -0.584 | -0.191 | 0.775 |
| Drg1          | -0.628 | -0.101 | 0.729 |
| Dse           | -0.751 | -0.201 | 0.952 |
| Dsel          | -0.606 | -0.182 | 0.788 |
| Dsp           | -0.515 | -0.215 | 0.730 |
| Dstn          | -0.609 | -0.347 | 0.957 |
| Dtd1          | -0.507 | -0.244 | 0.751 |
| Dtx4          | -0.672 | -0.189 | 0.861 |
| Dus4l         | -0.759 | 0.041  | 0.718 |
| Dusp22        | -0.592 | -0.190 | 0.782 |
| Dusp3         | -0.621 | -0.219 | 0.841 |
| Dusp7         | -0.601 | -0.134 | 0.736 |
| Dusp8         | -0.636 | -0.105 | 0.741 |
| Dync1i2       | -0.608 | -0.124 | 0.732 |
| Dync1li1      | -0.643 | -0.116 | 0.758 |
| E030013l19Rik | -0.632 | -0.233 | 0.864 |
| E130311K13Rik | -0.825 | 0.110  | 0.716 |
| E430018J23Rik | -0.573 | -0.165 | 0.738 |
| E430025E21Rik | -0.533 | -0.243 | 0.775 |
| Ebi3          | -0.539 | -0.248 | 0.787 |
| Ecd           | -0.550 | -0.183 | 0.734 |

|         |        |        |       |
|---------|--------|--------|-------|
| Ece1    | -0.704 | -0.277 | 0.981 |
| Ece2    | -0.787 | -0.056 | 0.843 |
| Ech1    | -0.641 | -0.098 | 0.739 |
| Echs1   | -0.630 | -0.144 | 0.775 |
| Eci1    | -0.612 | -0.445 | 1.057 |
| Eci2    | -0.649 | -0.243 | 0.892 |
| Eda2r   | -0.634 | -0.120 | 0.754 |
| Edem3   | -0.752 | -0.140 | 0.892 |
| Ednra   | -0.484 | -0.354 | 0.838 |
| Ednrb   | -0.621 | -0.379 | 1.000 |
| Eea1    | -0.666 | -0.153 | 0.819 |
| Eed     | -0.555 | -0.189 | 0.744 |
| Eef1a1  | -0.557 | -0.147 | 0.703 |
| Eef1e1  | -0.727 | -0.162 | 0.889 |
| Efcab10 | -0.579 | -0.297 | 0.876 |
| Efcab14 | -0.644 | -0.176 | 0.820 |
| Efhd2   | -0.625 | -0.075 | 0.699 |
| Efnb1   | -0.624 | -0.136 | 0.761 |
| Efnb2   | -0.507 | -0.233 | 0.740 |
| Efr3a   | -0.573 | -0.210 | 0.783 |
| Eftud2  | -0.627 | -0.162 | 0.789 |
| Egflam  | -0.684 | -0.142 | 0.826 |
| Egr2    | -0.669 | 0.005  | 0.664 |
| Ehd1    | -0.652 | -0.219 | 0.872 |
| Ehd2    | -0.688 | -0.228 | 0.916 |
| Ehd3    | -0.628 | -0.057 | 0.685 |
| Ehd4    | -0.552 | -0.214 | 0.766 |
| Eif1    | -0.770 | -0.151 | 0.921 |
| Eif1ax  | -0.670 | -0.238 | 0.908 |
| Eif1b   | -0.578 | -0.321 | 0.899 |
| Eif2a   | -0.739 | -0.135 | 0.873 |
| Eif2ak1 | -0.648 | -0.226 | 0.874 |
| Eif2b1  | -0.677 | -0.262 | 0.939 |
| Eif2s2  | -0.653 | -0.262 | 0.916 |
| Eif2s3x | -0.635 | -0.148 | 0.782 |
| Eif3b   | -0.529 | -0.219 | 0.748 |
| Eif3c   | -0.608 | -0.248 | 0.855 |
| Eif3d   | -0.607 | -0.179 | 0.786 |
| Eif3e   | -0.802 | -0.109 | 0.912 |
| Eif3f   | -0.673 | -0.180 | 0.853 |
| Eif3g   | -0.568 | -0.273 | 0.841 |
| Eif3h   | -0.623 | -0.181 | 0.804 |
| Eif3j1  | -0.624 | -0.180 | 0.804 |
| Eif3m   | -0.599 | -0.180 | 0.779 |
| Eif4a3  | -0.639 | -0.372 | 1.011 |
| Eif4e2  | -0.610 | -0.129 | 0.739 |
| Eif4g2  | -0.686 | -0.137 | 0.824 |
| Eif5    | -0.652 | -0.221 | 0.873 |
| Eif5a2  | -0.869 | -0.040 | 0.910 |
| Eif6    | -0.618 | -0.153 | 0.772 |
| Elavl1  | -0.789 | -0.085 | 0.873 |
| Elf1    | -0.643 | -0.084 | 0.727 |
| Elfn1   | -0.749 | -0.038 | 0.787 |
| Elk4    | -0.680 | -0.189 | 0.869 |
| Ell2    | -0.704 | -0.206 | 0.909 |
| Elmo2   | -0.680 | -0.077 | 0.757 |

|         |        |        |       |
|---------|--------|--------|-------|
| Elovl5  | -0.690 | -0.160 | 0.851 |
| Elovl6  | -0.617 | -0.228 | 0.846 |
| Elovl7  | -0.586 | -0.262 | 0.848 |
| Elp4    | -0.745 | -0.097 | 0.842 |
| Elp5    | -0.635 | -0.056 | 0.691 |
| Emb     | -0.478 | -0.335 | 0.813 |
| Emc2    | -0.587 | -0.313 | 0.900 |
| Emc8    | -0.681 | -0.104 | 0.785 |
| Emilin1 | -0.816 | -0.127 | 0.942 |
| Eml1    | -0.522 | -0.319 | 0.841 |
| Emp2    | -0.655 | -0.192 | 0.847 |
| Enc1    | -0.711 | -0.157 | 0.868 |
| Enpep   | -0.472 | -0.370 | 0.842 |
| Enpp1   | -0.689 | 0.036  | 0.653 |
| Enpp2   | -0.613 | -0.189 | 0.802 |
| Enpp4   | -0.564 | -0.297 | 0.861 |
| Enpp5   | -0.545 | -0.432 | 0.977 |
| Entpd3  | -0.842 | 0.014  | 0.828 |
| Eny2    | -0.658 | -0.270 | 0.927 |
| Epas1   | -0.687 | -0.283 | 0.970 |
| Epb41   | -0.614 | -0.107 | 0.721 |
| Epb41l2 | -0.658 | -0.079 | 0.737 |
| Epha2   | -0.626 | -0.093 | 0.719 |
| Epha3   | -0.809 | -0.095 | 0.904 |
| Ephb2   | -0.615 | -0.059 | 0.674 |
| Ephx2   | -0.689 | -0.006 | 0.695 |
| Eprs    | -0.641 | -0.216 | 0.856 |
| Eps8    | -0.667 | -0.232 | 0.898 |
| Eral1   | -0.630 | -0.179 | 0.809 |
| Erb4    | -0.564 | -0.174 | 0.738 |
| Ercc6l  | -0.746 | -0.017 | 0.763 |
| Ercc6l2 | -0.564 | -0.243 | 0.807 |
| Ercc8   | -0.807 | -0.145 | 0.952 |
| Erg     | -0.690 | -0.083 | 0.773 |
| Ergic2  | -0.634 | -0.077 | 0.711 |
| Ergic3  | -0.545 | -0.227 | 0.772 |
| Eri1    | -0.595 | -0.151 | 0.746 |
| Erlin1  | -0.772 | -0.023 | 0.796 |
| Ero1l   | -0.708 | -0.141 | 0.849 |
| Esyt2   | -0.601 | -0.125 | 0.726 |
| Etf1    | -0.746 | -0.202 | 0.948 |
| Etf1dh  | -0.758 | -0.158 | 0.916 |
| Ethe1   | -0.706 | -0.292 | 0.999 |
| Ets2    | -0.686 | -0.269 | 0.955 |
| Etv1    | -0.822 | -0.136 | 0.958 |
| Evi2a   | -0.763 | -0.009 | 0.771 |
| Exoc5   | -0.705 | -0.111 | 0.816 |
| Exosc1  | -0.551 | -0.270 | 0.821 |
| Exosc4  | -0.728 | -0.037 | 0.765 |
| Ext2    | -0.719 | -0.118 | 0.838 |
| F5      | -0.552 | -0.420 | 0.972 |
| Faap24  | -0.866 | 0.041  | 0.824 |
| Fads1   | -0.536 | -0.289 | 0.826 |
| Fads2   | -0.753 | -0.221 | 0.974 |
| Faim    | -0.662 | -0.168 | 0.829 |
| Fam105a | -0.662 | -0.040 | 0.702 |

|         |        |        |       |
|---------|--------|--------|-------|
| Fam110c | -0.742 | -0.023 | 0.765 |
| Fam117b | -0.862 | 0.013  | 0.849 |
| Fam118b | -0.664 | -0.102 | 0.765 |
| Fam126b | -0.770 | -0.125 | 0.894 |
| Fam129b | -0.552 | -0.160 | 0.712 |
| Fam136a | -0.765 | -0.118 | 0.883 |
| Fam169a | -0.574 | -0.258 | 0.831 |
| Fam171b | -0.632 | -0.308 | 0.940 |
| Fam175a | -0.569 | -0.202 | 0.771 |
| Fam198b | -0.696 | -0.073 | 0.769 |
| Fam199x | -0.783 | 0.031  | 0.752 |
| Fam206a | -0.737 | -0.180 | 0.916 |
| Fam210b | -0.683 | -0.223 | 0.906 |
| Fam220a | -0.525 | -0.291 | 0.816 |
| Fam26f  | -0.506 | -0.247 | 0.753 |
| Fam45a  | -0.645 | -0.238 | 0.883 |
| Fam49a  | -0.688 | -0.198 | 0.886 |
| Fam49b  | -0.799 | 0.036  | 0.763 |
| Fam58b  | -0.598 | -0.293 | 0.891 |
| Fam63b  | -0.684 | -0.009 | 0.693 |
| Fam65a  | -0.593 | -0.109 | 0.702 |
| Fam78b  | -0.828 | -0.078 | 0.906 |
| Fam83b  | -0.916 | 0.046  | 0.871 |
| Fam8a1  | -0.721 | -0.098 | 0.819 |
| Fam91a1 | -0.659 | -0.146 | 0.804 |
| Fam96b  | -0.718 | -0.175 | 0.892 |
| Fam98a  | -0.632 | -0.142 | 0.774 |
| Fam98b  | -0.497 | -0.336 | 0.833 |
| Fanci   | -0.726 | -0.042 | 0.768 |
| Far1    | -0.614 | -0.058 | 0.673 |
| Farp1   | -0.555 | -0.160 | 0.715 |
| Fasl    | -0.769 | -0.153 | 0.921 |
| Fasn    | -0.463 | -0.357 | 0.820 |
| Fastkd2 | -0.609 | -0.089 | 0.698 |
| Fbl     | -0.591 | -0.197 | 0.788 |
| Fbln2   | -0.822 | 0.047  | 0.776 |
| Fbln5   | -0.684 | -0.085 | 0.769 |
| Fbn1    | -0.719 | -0.058 | 0.777 |
| Fbxl5   | -0.638 | -0.134 | 0.772 |
| Fbxo10  | -0.521 | -0.199 | 0.720 |
| Fbxo11  | -0.592 | -0.115 | 0.707 |
| Fbxo25  | -0.628 | -0.280 | 0.908 |
| Fbxo28  | -0.565 | -0.183 | 0.748 |
| Fbxo31  | -0.549 | -0.310 | 0.860 |
| Fbxo33  | -0.714 | -0.134 | 0.849 |
| Fbxo8   | -0.513 | -0.237 | 0.750 |
| Fbxw11  | -0.637 | -0.126 | 0.763 |
| Fcf1    | -0.637 | -0.266 | 0.903 |
| Fech    | -0.637 | -0.203 | 0.840 |
| Fermt2  | -0.698 | -0.292 | 0.989 |
| Fgd4    | -0.650 | -0.102 | 0.752 |
| Fgf10   | -0.575 | -0.275 | 0.849 |
| Fgr     | -0.631 | -0.032 | 0.663 |
| Fh1     | -0.561 | -0.288 | 0.849 |
| Fhl1    | -0.542 | -0.170 | 0.712 |
| Ficd    | -0.583 | -0.149 | 0.732 |

|            |        |        |       |
|------------|--------|--------|-------|
| Filip1l    | -0.532 | -0.266 | 0.798 |
| Fkbp10     | -0.654 | -0.067 | 0.721 |
| Fkbp1a     | -0.687 | -0.247 | 0.934 |
| Fkbp1b     | -0.600 | -0.257 | 0.857 |
| Fkbp3      | -0.565 | -0.376 | 0.940 |
| Fli1       | -0.716 | -0.190 | 0.906 |
| Flna       | -0.553 | -0.158 | 0.712 |
| Flnb       | -0.745 | -0.099 | 0.844 |
| Flrt2      | -0.585 | -0.231 | 0.816 |
| Flrt3      | -0.683 | -0.012 | 0.696 |
| Flt4       | -0.620 | -0.262 | 0.882 |
| Fmo4       | -0.550 | -0.365 | 0.915 |
| Fnbp1l     | -0.763 | -0.079 | 0.842 |
| Fndc3a     | -0.601 | -0.146 | 0.747 |
| Fndc3b     | -0.790 | -0.077 | 0.867 |
| Fnta       | -0.506 | -0.333 | 0.839 |
| Fntb       | -0.538 | -0.222 | 0.760 |
| Fosl1      | -0.526 | -0.190 | 0.716 |
| Foxk2      | -0.646 | -0.091 | 0.737 |
| Fpgt       | -0.686 | -0.156 | 0.842 |
| Frg1       | -0.504 | -0.252 | 0.756 |
| Frmd6      | -0.580 | -0.144 | 0.725 |
| Frs2       | -0.594 | -0.108 | 0.703 |
| Fstl1      | -0.685 | 0.003  | 0.683 |
| Fstl3      | -0.693 | -0.156 | 0.849 |
| Fth1       | -0.599 | -0.422 | 1.021 |
| Fuca2      | -0.668 | -0.170 | 0.838 |
| Fundc2     | -0.633 | -0.176 | 0.809 |
| Furin      | -0.632 | -0.066 | 0.698 |
| Fut8       | -0.718 | -0.227 | 0.945 |
| Fxyd6      | -0.633 | -0.039 | 0.672 |
| Fzd4       | -0.588 | -0.238 | 0.825 |
| G6pdx      | -0.671 | -0.242 | 0.913 |
| Gaa        | -0.623 | -0.191 | 0.814 |
| Gab2       | -0.628 | -0.094 | 0.722 |
| Gabarap    | -0.616 | -0.185 | 0.801 |
| Gabarapl1  | -0.485 | -0.303 | 0.788 |
| Gadd45gip1 | -0.543 | -0.225 | 0.768 |
| Galns      | -0.829 | -0.089 | 0.918 |
| Galnt1     | -0.602 | -0.190 | 0.792 |
| Galnt15    | -0.478 | -0.333 | 0.811 |
| Galnt2     | -0.641 | -0.148 | 0.789 |
| Ganab      | -0.619 | -0.149 | 0.767 |
| Gar1       | -0.909 | 0.077  | 0.832 |
| Gars       | -0.685 | -0.210 | 0.895 |
| Gas7       | -0.643 | -0.150 | 0.793 |
| Gatad2a    | -0.582 | -0.172 | 0.754 |
| Gatc       | -0.740 | -0.078 | 0.819 |
| Gatm       | -0.773 | -0.107 | 0.879 |
| Gba        | -0.576 | -0.193 | 0.768 |
| Gbas       | -0.662 | -0.215 | 0.877 |
| Gbe1       | -0.534 | -0.248 | 0.782 |
| Gbp2       | -0.573 | -0.202 | 0.775 |
| Gch1       | -0.605 | -0.370 | 0.975 |
| Gclc       | -0.521 | -0.203 | 0.724 |
| Gcnt1      | -0.623 | -0.116 | 0.739 |



|          |        |        |       |
|----------|--------|--------|-------|
| Gcnt2    | -0.498 | -0.267 | 0.764 |
| Gcsam    | -0.549 | -0.392 | 0.941 |
| Gdap2    | -0.660 | -0.211 | 0.871 |
| Gdf15    | -0.860 | -0.048 | 0.908 |
| Gdi2     | -0.657 | -0.115 | 0.772 |
| Gdnf     | -0.531 | -0.246 | 0.776 |
| Gdpd1    | -0.642 | -0.189 | 0.831 |
| Gdpd2    | -0.582 | -0.250 | 0.832 |
| Gemin6   | -0.755 | -0.092 | 0.847 |
| Gemin7   | -0.764 | -0.007 | 0.771 |
| Get4     | -0.609 | -0.210 | 0.819 |
| Gfm1     | -0.616 | -0.168 | 0.784 |
| Gfra2    | -0.632 | -0.178 | 0.810 |
| Ggps1    | -0.722 | -0.140 | 0.862 |
| Ggta1    | -0.633 | -0.073 | 0.706 |
| Ghitm    | -0.629 | -0.262 | 0.891 |
| Ghr      | -0.548 | -0.193 | 0.741 |
| Ghrl     | -0.519 | -0.216 | 0.735 |
| Gin1     | -0.843 | -0.015 | 0.858 |
| Ginm1    | -0.615 | -0.342 | 0.957 |
| Gins1    | -0.628 | -0.221 | 0.849 |
| Gins2    | -0.635 | -0.129 | 0.763 |
| Gja1     | -0.641 | -0.330 | 0.971 |
| Gk       | -0.771 | -0.057 | 0.828 |
| Gkap1    | -0.506 | -0.254 | 0.760 |
| Gla      | -0.622 | -0.200 | 0.822 |
| Glb1     | -0.645 | -0.248 | 0.893 |
| Glce     | -0.751 | -0.157 | 0.908 |
| Glg1     | -0.626 | -0.122 | 0.748 |
| Gli3     | -0.790 | -0.021 | 0.811 |
| Glipr2   | -0.698 | -0.185 | 0.883 |
| Gimp     | -0.703 | -0.216 | 0.919 |
| Glod4    | -0.528 | -0.191 | 0.719 |
| Glp2r    | -0.502 | -0.349 | 0.852 |
| Glrx3    | -0.618 | -0.187 | 0.805 |
| Glt8d1   | -0.599 | -0.131 | 0.730 |
| Gltp     | -0.664 | -0.267 | 0.931 |
| Gltscr1l | -0.630 | -0.136 | 0.767 |
| Glud1    | -0.724 | -0.172 | 0.896 |
| Glul     | -0.741 | -0.210 | 0.952 |
| Gm11110  | -0.563 | -0.337 | 0.901 |
| Gm11696  | -0.668 | -0.134 | 0.802 |
| Gm14005  | -0.651 | -0.164 | 0.815 |
| Gm14295  | -0.784 | 0.031  | 0.753 |
| Gm14306  | -0.493 | -0.298 | 0.790 |
| Gm14418  | -0.621 | -0.157 | 0.779 |
| Gm14698  | -0.774 | 0.024  | 0.750 |
| Gm15441  | -0.721 | -0.055 | 0.776 |
| Gm15706  | -0.580 | -0.247 | 0.827 |
| Gm15931  | -0.710 | 0.007  | 0.703 |
| Gm16083  | -0.639 | -0.111 | 0.751 |
| Gm26566  | -0.821 | -0.089 | 0.911 |
| Gm26809  | -0.813 | -0.034 | 0.847 |
| Gm28856  | -0.975 | 0.152  | 0.823 |
| Gm2a     | -0.743 | -0.157 | 0.900 |
| Gm3604   | -0.879 | 0.121  | 0.757 |

|         |        |        |       |
|---------|--------|--------|-------|
| Gm37768 | -0.756 | 0.049  | 0.708 |
| Gm42031 | -0.727 | -0.124 | 0.851 |
| Gm4285  | -0.674 | -0.008 | 0.682 |
| Gm44226 | -0.703 | -0.044 | 0.747 |
| Gm4956  | -0.655 | -0.325 | 0.980 |
| Gm5617  | -0.729 | -0.012 | 0.741 |
| Gm6209  | -0.682 | -0.261 | 0.944 |
| Gm6712  | -0.721 | -0.068 | 0.789 |
| Gm8797  | -0.751 | -0.092 | 0.844 |
| Gm9776  | -0.654 | -0.031 | 0.685 |
| Gm9938  | -0.627 | -0.034 | 0.661 |
| Gmfb    | -0.585 | -0.147 | 0.731 |
| Gmfg    | -0.621 | -0.148 | 0.769 |
| Gmpr2   | -0.629 | -0.266 | 0.895 |
| Gmps    | -0.568 | -0.202 | 0.770 |
| Gnai1   | -0.704 | 0.029  | 0.675 |
| Gnai2   | -0.666 | -0.178 | 0.844 |
| Gnai3   | -0.591 | -0.178 | 0.769 |
| Gnb1    | -0.635 | -0.246 | 0.881 |
| Gnb2    | -0.655 | -0.235 | 0.890 |
| Gnl3l   | -0.604 | -0.163 | 0.767 |
| Gnpda2  | -0.550 | -0.197 | 0.747 |
| Gnptg   | -0.634 | -0.283 | 0.916 |
| Gns     | -0.594 | -0.176 | 0.770 |
| Golga5  | -0.596 | -0.146 | 0.742 |
| Golim4  | -0.663 | -0.050 | 0.713 |
| Golm1   | -0.533 | -0.173 | 0.705 |
| Golph3  | -0.566 | -0.159 | 0.724 |
| Golph3l | -0.634 | -0.075 | 0.709 |
| Golt1b  | -0.798 | -0.098 | 0.895 |
| Gopc    | -0.552 | -0.158 | 0.710 |
| Got2    | -0.689 | -0.255 | 0.944 |
| Gpalpp1 | -0.710 | -0.144 | 0.854 |
| Gpbp1   | -0.540 | -0.238 | 0.778 |
| Gpc1    | -0.821 | 0.086  | 0.735 |
| Gpc3    | -0.717 | -0.267 | 0.984 |
| Gpcpd1  | -0.590 | -0.149 | 0.739 |
| Gpi1    | -0.583 | -0.146 | 0.729 |
| Gpnmb   | -0.559 | -0.232 | 0.791 |
| Gpr180  | -0.538 | -0.275 | 0.814 |
| Gpr3    | -0.767 | -0.101 | 0.868 |
| Gpr65   | -0.889 | 0.060  | 0.829 |
| Gpr88   | -0.897 | 0.057  | 0.840 |
| Gpr89   | -0.801 | 0.041  | 0.760 |
| Gps1    | -0.560 | -0.274 | 0.834 |
| Gpx1    | -0.613 | -0.198 | 0.810 |
| Gpx7    | -0.644 | -0.318 | 0.961 |
| Grb10   | -0.710 | -0.084 | 0.794 |
| Grhpr   | -0.664 | -0.146 | 0.810 |
| Gria3   | -0.781 | 0.059  | 0.722 |
| Grina   | -0.670 | -0.134 | 0.803 |
| Grn     | -0.684 | -0.194 | 0.878 |
| Grp     | -0.718 | -0.033 | 0.751 |
| Gsk3a   | -0.575 | -0.188 | 0.763 |
| Gskip   | -0.673 | 0.039  | 0.634 |
| Gspt1   | -0.669 | -0.258 | 0.927 |

|           |        |        |       |
|-----------|--------|--------|-------|
| Gsr       | -0.682 | -0.273 | 0.955 |
| Gstp1     | -0.507 | -0.390 | 0.897 |
| Gstt1     | -0.609 | -0.242 | 0.850 |
| Gtf2a1    | -0.586 | -0.211 | 0.796 |
| Gtf2a2    | -0.757 | -0.115 | 0.871 |
| Gtf2b     | -0.544 | -0.263 | 0.807 |
| Gtf2f2    | -0.672 | -0.266 | 0.938 |
| Gtf2h4    | -0.526 | -0.318 | 0.845 |
| Gtf2h5    | -0.591 | -0.201 | 0.792 |
| Gtf3a     | -0.776 | 0.048  | 0.728 |
| Gtf3c6    | -0.757 | -0.199 | 0.957 |
| Gtpbp10   | -0.583 | -0.226 | 0.809 |
| Gtpbp8    | -0.729 | 0.072  | 0.657 |
| Gucy1a3   | -0.540 | -0.183 | 0.723 |
| Gucy1b3   | -0.699 | -0.231 | 0.930 |
| Gusb      | -0.679 | -0.130 | 0.809 |
| Gypc      | -0.729 | -0.060 | 0.789 |
| H1f0      | -0.496 | -0.288 | 0.784 |
| H3f3b     | -0.639 | -0.242 | 0.881 |
| Hadh      | -0.512 | -0.254 | 0.766 |
| Hadha     | -0.515 | -0.209 | 0.724 |
| Hadhb     | -0.700 | -0.091 | 0.790 |
| Hars      | -0.583 | -0.147 | 0.730 |
| Has2      | -0.834 | -0.074 | 0.908 |
| Hat1      | -0.712 | -0.112 | 0.824 |
| Haus2     | -0.798 | -0.108 | 0.906 |
| Haus3     | -0.775 | -0.108 | 0.883 |
| Havcr2    | -0.730 | -0.058 | 0.788 |
| Hbp1      | -0.789 | -0.153 | 0.942 |
| Hccs      | -0.707 | -0.054 | 0.762 |
| Hcfc1     | -0.664 | -0.166 | 0.830 |
| Hdlbp     | -0.716 | -0.206 | 0.922 |
| Heatr1    | -0.634 | -0.181 | 0.815 |
| Hecw2     | -0.818 | -0.074 | 0.892 |
| Heg1      | -0.564 | -0.142 | 0.706 |
| Heph      | -0.701 | -0.090 | 0.791 |
| Herpud1   | -0.675 | -0.124 | 0.799 |
| Herpud2   | -0.704 | -0.215 | 0.919 |
| Hey2      | -0.603 | -0.254 | 0.857 |
| Hibadh    | -0.656 | -0.248 | 0.904 |
| Higd2a    | -0.577 | -0.294 | 0.871 |
| Hikeshi   | -0.774 | -0.120 | 0.894 |
| Hipk3     | -0.688 | -0.164 | 0.852 |
| Hist1h1a  | -0.481 | -0.320 | 0.801 |
| Hist1h1b  | -0.576 | -0.350 | 0.926 |
| Hist1h1c  | -0.643 | -0.193 | 0.835 |
| Hist1h1d  | -0.698 | -0.133 | 0.831 |
| Hist1h1e  | -0.526 | -0.248 | 0.774 |
| Hist1h2ak | -0.680 | -0.116 | 0.797 |
| Hist1h2bl | -0.649 | -0.196 | 0.846 |
| Hist1h3g  | -0.514 | -0.334 | 0.848 |
| Hmga1     | -0.537 | -0.307 | 0.844 |
| Hmgb1     | -0.545 | -0.197 | 0.743 |
| Hmgcs1    | -0.499 | -0.286 | 0.785 |
| Hmgcs2    | -0.569 | -0.366 | 0.935 |
| Hmgn1     | -0.512 | -0.232 | 0.744 |

|               |        |        |       |
|---------------|--------|--------|-------|
| Hn1l          | -0.758 | -0.159 | 0.918 |
| Hnrnpa3       | -0.651 | -0.216 | 0.867 |
| Hnrnpab       | -0.560 | -0.250 | 0.810 |
| Hnrnpd        | -0.583 | -0.197 | 0.780 |
| Hnrnph2       | -0.803 | -0.106 | 0.909 |
| Hnrnpk        | -0.720 | -0.124 | 0.844 |
| Hopx          | -0.524 | -0.338 | 0.862 |
| Hotairm1      | -0.776 | -0.053 | 0.829 |
| Hpgds         | -0.753 | 0.022  | 0.730 |
| Hprt          | -0.693 | -0.054 | 0.746 |
| Hscb          | -0.828 | -0.053 | 0.881 |
| Hsd17b11      | -0.744 | -0.169 | 0.913 |
| Hsd17b7       | -0.751 | -0.188 | 0.939 |
| Hsd3b7        | -0.798 | -0.041 | 0.839 |
| Hsdl2         | -0.670 | -0.366 | 1.036 |
| Hsf2          | -0.551 | -0.155 | 0.706 |
| Hsp90aa1      | -0.708 | -0.231 | 0.939 |
| Hsp90ab1      | -0.667 | -0.119 | 0.786 |
| Hsp90b1       | -0.744 | -0.182 | 0.926 |
| Hspa12b       | -0.634 | -0.072 | 0.706 |
| Hspa4         | -0.557 | -0.178 | 0.735 |
| Hspa9         | -0.694 | -0.225 | 0.919 |
| Hspb2         | -0.576 | -0.240 | 0.816 |
| Hspb8         | -0.753 | -0.167 | 0.920 |
| Hspd1         | -0.704 | -0.230 | 0.934 |
| Htatip2       | -0.593 | -0.206 | 0.799 |
| Hus1          | -0.468 | -0.377 | 0.845 |
| Hypk          | -0.531 | -0.398 | 0.929 |
| I830077J02Rik | -0.810 | 0.005  | 0.806 |
| Iars          | -0.717 | -0.127 | 0.844 |
| Ica1l         | -0.785 | 0.102  | 0.682 |
| Icam1         | -0.572 | -0.211 | 0.783 |
| Ick           | -0.490 | -0.296 | 0.785 |
| Id1           | -0.734 | -0.123 | 0.857 |
| Id2           | -0.726 | -0.223 | 0.949 |
| Idh1          | -0.518 | -0.356 | 0.874 |
| Idi1          | -0.711 | -0.261 | 0.972 |
| Ids           | -0.697 | -0.092 | 0.790 |
| Ifi207        | -0.870 | 0.045  | 0.826 |
| Ifi30         | -0.713 | -0.014 | 0.727 |
| Ifi47         | -0.594 | -0.345 | 0.938 |
| Ifih1         | -0.586 | -0.239 | 0.825 |
| Ifitm10       | -0.818 | -0.018 | 0.836 |
| Ifnar2        | -0.592 | -0.159 | 0.751 |
| Ifngr1        | -0.773 | -0.188 | 0.961 |
| Ifrd1         | -0.582 | -0.140 | 0.722 |
| Ift20         | -0.512 | -0.301 | 0.814 |
| Ift27         | -0.671 | -0.181 | 0.852 |
| Igf2          | -0.528 | -0.253 | 0.781 |
| Igf2bp2       | -0.805 | 0.022  | 0.783 |
| Igf2r         | -0.582 | -0.176 | 0.758 |
| Igfbp3        | -0.760 | -0.118 | 0.878 |
| Ighv3-6       | -0.579 | -0.457 | 1.036 |
| Igip          | -0.873 | -0.028 | 0.901 |
| Igkv6-32      | -0.631 | -0.263 | 0.895 |
| Iglon5        | -0.732 | 0.065  | 0.667 |

|          |        |        |       |
|----------|--------|--------|-------|
| ligp1    | -0.619 | -0.075 | 0.695 |
| lk       | -0.630 | -0.172 | 0.801 |
| lkbip    | -0.562 | -0.200 | 0.762 |
| ll1r1    | -0.695 | -0.022 | 0.717 |
| ll1rap   | -0.801 | -0.139 | 0.940 |
| ll2rg    | -0.919 | 0.067  | 0.852 |
| ll4ra    | -0.727 | 0.018  | 0.709 |
| ll6ra    | -0.703 | -0.019 | 0.722 |
| ll6st    | -0.661 | -0.165 | 0.826 |
| ll7      | -0.636 | -0.090 | 0.726 |
| llk      | -0.644 | -0.247 | 0.892 |
| lmp1l    | -0.681 | -0.068 | 0.748 |
| lmmt     | -0.620 | -0.199 | 0.819 |
| lmp4     | -0.562 | -0.171 | 0.733 |
| lmpdh2   | -0.693 | -0.198 | 0.890 |
| lnafm2   | -0.762 | -0.167 | 0.929 |
| lng3     | -0.573 | -0.151 | 0.725 |
| lnhba    | -0.756 | 0.075  | 0.681 |
| lnip     | -0.686 | -0.008 | 0.694 |
| lno80c   | -0.635 | -0.125 | 0.761 |
| lnts12   | -0.592 | -0.133 | 0.725 |
| lnts6    | -0.651 | -0.080 | 0.731 |
| lpo11    | -0.545 | -0.268 | 0.813 |
| lpo5     | -0.657 | -0.266 | 0.923 |
| lpo7     | -0.801 | -0.168 | 0.969 |
| lqgap1   | -0.576 | -0.246 | 0.822 |
| lrak4    | -0.615 | -0.089 | 0.704 |
| lreb2    | -0.602 | -0.144 | 0.746 |
| lrs2     | -0.821 | -0.134 | 0.955 |
| lrs3     | -0.707 | -0.122 | 0.829 |
| lrx1     | -0.595 | -0.321 | 0.916 |
| lsca1    | -0.518 | -0.252 | 0.770 |
| lsca2    | -0.559 | -0.271 | 0.830 |
| lscu     | -0.690 | -0.277 | 0.966 |
| lslr     | -0.591 | -0.123 | 0.714 |
| ltfg1    | -0.663 | -0.178 | 0.841 |
| ltga1    | -0.661 | -0.185 | 0.845 |
| ltga2    | -0.663 | -0.308 | 0.971 |
| ltga3    | -0.557 | -0.172 | 0.729 |
| ltga5    | -0.785 | -0.167 | 0.952 |
| ltga6    | -0.694 | -0.167 | 0.861 |
| ltga8    | -0.649 | -0.362 | 1.010 |
| ltgav    | -0.733 | -0.079 | 0.812 |
| ltgb1bp1 | -0.661 | -0.146 | 0.807 |
| ltgb2    | -0.652 | -0.137 | 0.789 |
| ltgb3    | -0.693 | 0.011  | 0.683 |
| ltgb3bp  | -0.607 | -0.426 | 1.033 |
| ltih3    | -0.547 | -0.259 | 0.806 |
| ltpa     | -0.505 | -0.287 | 0.792 |
| ltpripl2 | -0.637 | -0.120 | 0.757 |
| jade2    | -0.738 | -0.026 | 0.765 |
| jak1     | -0.615 | -0.139 | 0.754 |
| jazf1    | -0.622 | -0.131 | 0.753 |
| jkamp    | -0.701 | -0.261 | 0.962 |
| jun      | -0.505 | -0.235 | 0.741 |
| jup      | -0.662 | -0.210 | 0.872 |

|         |        |        |       |
|---------|--------|--------|-------|
| Kars    | -0.620 | -0.385 | 1.005 |
| Kbtbd4  | -0.697 | -0.146 | 0.843 |
| Kcnab1  | -0.737 | -0.135 | 0.872 |
| Kcnh7   | -0.784 | -0.168 | 0.953 |
| Kcnj15  | -0.651 | -0.300 | 0.951 |
| Kcnn1   | -0.792 | 0.087  | 0.705 |
| Kdelc1  | -0.709 | -0.107 | 0.816 |
| Kdelc2  | -0.615 | -0.284 | 0.899 |
| Kdelr1  | -0.684 | -0.152 | 0.836 |
| Kdsr    | -0.748 | -0.082 | 0.830 |
| Khdrbs3 | -0.519 | -0.210 | 0.729 |
| Kif18a  | -0.679 | 0.028  | 0.651 |
| Kif5b   | -0.611 | -0.188 | 0.799 |
| Kirrel  | -0.644 | -0.091 | 0.735 |
| Kitl    | -0.693 | -0.112 | 0.805 |
| Klf10   | -0.783 | -0.028 | 0.811 |
| Klf16   | -0.664 | 0.013  | 0.651 |
| Klf2    | -0.813 | -0.036 | 0.849 |
| Klf3    | -0.668 | -0.039 | 0.706 |
| Klf6    | -0.717 | -0.169 | 0.886 |
| Klf7    | -0.710 | -0.077 | 0.787 |
| Klhl11  | -0.549 | -0.176 | 0.725 |
| Klhl2   | -0.825 | -0.104 | 0.929 |
| Klhl29  | -0.802 | 0.003  | 0.799 |
| Klhl9   | -0.730 | -0.188 | 0.918 |
| Klra2   | -0.820 | -0.046 | 0.865 |
| Klrb1a  | -0.862 | 0.000  | 0.862 |
| Knop1   | -0.572 | -0.153 | 0.725 |
| Kpna1   | -0.829 | -0.096 | 0.925 |
| Kpna2   | -0.695 | 0.027  | 0.669 |
| Kpna4   | -0.781 | -0.105 | 0.886 |
| Krt18   | -0.564 | -0.234 | 0.798 |
| Krt7    | -0.666 | -0.274 | 0.940 |
| Krt8    | -0.685 | -0.306 | 0.992 |
| Lactb   | -0.614 | -0.151 | 0.765 |
| Lactb2  | -0.666 | -0.264 | 0.930 |
| Lair1   | -0.710 | -0.163 | 0.872 |
| Lama2   | -0.629 | -0.295 | 0.924 |
| Lamb1   | -0.754 | -0.162 | 0.916 |
| Lamb3   | -0.656 | -0.150 | 0.806 |
| Lamc1   | -0.660 | -0.176 | 0.836 |
| Lamc2   | -0.742 | -0.217 | 0.959 |
| Lamtor1 | -0.658 | -0.340 | 0.998 |
| Lamtor2 | -0.593 | -0.347 | 0.940 |
| Lamtor3 | -0.697 | -0.294 | 0.991 |
| Lamtor4 | -0.653 | -0.080 | 0.733 |
| Lap3    | -0.583 | -0.201 | 0.784 |
| Laptm4b | -0.557 | -0.267 | 0.824 |
| Larp7   | -0.579 | -0.132 | 0.710 |
| Layn    | -0.547 | -0.226 | 0.773 |
| Lbp     | -0.674 | -0.284 | 0.958 |
| Lbr     | -0.546 | -0.204 | 0.750 |
| Lclat1  | -0.713 | -0.118 | 0.831 |
| Lcp1    | -0.720 | -0.218 | 0.939 |
| Ldb2    | -0.650 | -0.244 | 0.894 |
| Ldha    | -0.559 | -0.212 | 0.771 |

|          |        |        |       |
|----------|--------|--------|-------|
| Ldlr     | -0.510 | -0.293 | 0.803 |
| Ldlrad3  | -0.621 | -0.173 | 0.794 |
| Leo1     | -0.612 | -0.083 | 0.695 |
| Lepr     | -0.752 | -0.082 | 0.834 |
| Leprot   | -0.672 | -0.203 | 0.876 |
| Lgals3bp | -0.604 | -0.283 | 0.886 |
| Lgals8   | -0.649 | -0.152 | 0.801 |
| Lgr4     | -0.526 | -0.423 | 0.949 |
| Lig4     | -0.486 | -0.269 | 0.755 |
| Lilra5   | -0.577 | -0.436 | 1.014 |
| Limch1   | -0.559 | -0.201 | 0.760 |
| Limk1    | -0.722 | -0.041 | 0.763 |
| Lims1    | -0.804 | -0.083 | 0.887 |
| Lims2    | -0.712 | -0.028 | 0.741 |
| Lin54    | -0.618 | -0.178 | 0.796 |
| Lin7c    | -0.612 | -0.113 | 0.726 |
| Lins1    | -0.688 | -0.024 | 0.712 |
| Lipa     | -0.805 | -0.075 | 0.880 |
| Lipe     | -0.764 | -0.010 | 0.774 |
| Lix1l    | -0.626 | -0.095 | 0.722 |
| Lman2    | -0.598 | -0.165 | 0.763 |
| Lmbrd2   | -0.651 | -0.272 | 0.923 |
| Lmcd1    | -0.798 | 0.012  | 0.786 |
| Lmna     | -0.622 | -0.210 | 0.833 |
| Lmo4     | -0.575 | -0.192 | 0.767 |
| Lnpep    | -0.652 | -0.168 | 0.820 |
| Lnpk1    | -0.692 | 0.047  | 0.645 |
| Lnx2     | -0.670 | -0.069 | 0.740 |
| Loxl1    | -0.694 | -0.262 | 0.956 |
| Loxl2    | -0.535 | -0.185 | 0.720 |
| Loxl4    | -0.747 | -0.173 | 0.920 |
| Lpcat3   | -0.662 | -0.260 | 0.922 |
| Lpgat1   | -0.681 | -0.191 | 0.872 |
| Lpin2    | -0.637 | -0.178 | 0.815 |
| Lpp      | -0.610 | -0.194 | 0.804 |
| Lpxn     | -0.892 | 0.091  | 0.801 |
| Lrfn1    | -0.686 | -0.019 | 0.704 |
| Lrif1    | -0.730 | 0.003  | 0.727 |
| Lrp1     | -0.700 | -0.205 | 0.905 |
| Lrp11    | -0.726 | 0.034  | 0.693 |
| Lrpap1   | -0.629 | -0.268 | 0.897 |
| Lrrc25   | -0.703 | -0.153 | 0.856 |
| Lrrc28   | -0.482 | -0.290 | 0.772 |
| Lrrc32   | -0.581 | -0.315 | 0.896 |
| Lrrc40   | -0.677 | -0.191 | 0.868 |
| Lrrc41   | -0.707 | -0.107 | 0.814 |
| Lrrc57   | -0.713 | -0.245 | 0.958 |
| Lrrc58   | -0.679 | -0.122 | 0.801 |
| Lrrc8c   | -0.734 | -0.057 | 0.791 |
| Lrtm2    | -0.608 | -0.275 | 0.883 |
| Lsamp    | -0.621 | -0.287 | 0.908 |
| Lsm1     | -0.588 | -0.289 | 0.877 |
| Lsm10    | -0.685 | -0.237 | 0.922 |
| Lsm12    | -0.625 | -0.083 | 0.708 |
| Lsm2     | -0.549 | -0.195 | 0.744 |
| Lsm3     | -0.561 | -0.383 | 0.943 |

|         |        |        |       |
|---------|--------|--------|-------|
| Lsm6    | -0.583 | -0.130 | 0.712 |
| Ltbp1   | -0.700 | -0.206 | 0.905 |
| Ltc4s   | -0.608 | -0.356 | 0.965 |
| Ltv1    | -0.713 | -0.238 | 0.951 |
| Luzp1   | -0.657 | -0.123 | 0.779 |
| Ly6g6c  | -0.751 | -0.162 | 0.914 |
| Ly86    | -0.736 | -0.111 | 0.847 |
| Ly9     | -0.848 | -0.030 | 0.878 |
| Lym5    | -0.845 | -0.059 | 0.904 |
| Lysmd2  | -0.575 | -0.128 | 0.703 |
| Lyz2    | -0.544 | -0.202 | 0.746 |
| M6pr    | -0.572 | -0.164 | 0.736 |
| Macrod2 | -0.638 | -0.047 | 0.685 |
| Mad2l2  | -0.685 | -0.062 | 0.747 |
| Maea    | -0.744 | -0.163 | 0.907 |
| Maf1    | -0.572 | -0.149 | 0.721 |
| Mafk    | -0.659 | -0.171 | 0.830 |
| Maged2  | -0.825 | -0.082 | 0.907 |
| Magee1  | -0.641 | -0.292 | 0.933 |
| Magt1   | -0.650 | -0.097 | 0.747 |
| Malsu1  | -0.668 | -0.218 | 0.886 |
| Maml1   | -0.630 | -0.163 | 0.792 |
| Maml2   | -0.552 | -0.157 | 0.709 |
| Man2a1  | -0.757 | -0.121 | 0.878 |
| Manbal  | -0.700 | -0.246 | 0.946 |
| Mansc1  | -0.694 | -0.248 | 0.942 |
| Maoa    | -0.522 | -0.446 | 0.969 |
| Map2k4  | -0.581 | -0.269 | 0.849 |
| Map3k2  | -0.614 | -0.084 | 0.698 |
| Map3k7  | -0.624 | -0.049 | 0.673 |
| Mapk1   | -0.704 | -0.190 | 0.894 |
| Mapk8   | -0.624 | -0.052 | 0.676 |
| Mapk9   | -0.535 | -0.170 | 0.705 |
| Mapre2  | -0.644 | -0.194 | 0.837 |
| March1  | -0.876 | 0.113  | 0.763 |
| March5  | -0.528 | -0.222 | 0.749 |
| Marcks  | -0.734 | 0.005  | 0.729 |
| Mars    | -0.694 | -0.060 | 0.754 |
| Mastl   | -0.753 | -0.195 | 0.948 |
| Mat2a   | -0.615 | -0.162 | 0.777 |
| Matn2   | -0.748 | -0.171 | 0.919 |
| Mbnl1   | -0.792 | -0.117 | 0.909 |
| Mbnl2   | -0.659 | -0.213 | 0.872 |
| Mbnl3   | -0.687 | -0.053 | 0.739 |
| Mbtps2  | -0.594 | -0.128 | 0.722 |
| Mcam    | -0.760 | -0.105 | 0.866 |
| Mcm3    | -0.589 | -0.120 | 0.710 |
| Mcm4    | -0.623 | -0.339 | 0.963 |
| Mcmbp   | -0.660 | -0.071 | 0.731 |
| Mcts1   | -0.708 | -0.190 | 0.898 |
| Mdfic   | -0.615 | -0.083 | 0.698 |
| Mdh1    | -0.620 | -0.283 | 0.903 |
| Mdh2    | -0.668 | -0.238 | 0.906 |
| Me2     | -0.568 | -0.184 | 0.753 |
| Med10   | -0.804 | -0.027 | 0.831 |
| Med14   | -0.646 | -0.087 | 0.733 |



|         |        |        |       |
|---------|--------|--------|-------|
| Med17   | -0.816 | -0.018 | 0.834 |
| Med19   | -0.536 | -0.204 | 0.740 |
| Med30   | -0.679 | -0.120 | 0.799 |
| Med31   | -0.847 | -0.057 | 0.904 |
| Med4    | -0.620 | -0.144 | 0.764 |
| Med6    | -0.585 | -0.439 | 1.024 |
| Med8    | -0.688 | -0.115 | 0.803 |
| Med9    | -0.670 | -0.184 | 0.854 |
| Med9os  | -0.489 | -0.401 | 0.890 |
| Mef2a   | -0.725 | -0.195 | 0.920 |
| Memo1   | -0.725 | -0.099 | 0.823 |
| Mesdc2  | -0.665 | -0.091 | 0.755 |
| Metap2  | -0.549 | -0.188 | 0.737 |
| Mettl15 | -0.534 | -0.212 | 0.746 |
| Mettl23 | -0.569 | -0.184 | 0.753 |
| Mettl4  | -0.682 | -0.058 | 0.740 |
| Mettl9  | -0.707 | -0.275 | 0.982 |
| Mfap1b  | -0.685 | -0.269 | 0.954 |
| Mfap2   | -0.851 | 0.066  | 0.785 |
| Mfap3   | -0.649 | -0.051 | 0.700 |
| Mfap4   | -0.763 | -0.171 | 0.934 |
| Mff     | -0.566 | -0.211 | 0.778 |
| Mfge8   | -0.634 | -0.143 | 0.777 |
| Mfsd1   | -0.741 | -0.169 | 0.909 |
| Mfsd10  | -0.581 | -0.211 | 0.792 |
| Mfsd14a | -0.564 | -0.229 | 0.792 |
| Mfsd14b | -0.730 | -0.112 | 0.842 |
| Mfsd7b  | -0.741 | -0.106 | 0.847 |
| Mfsd8   | -0.558 | -0.272 | 0.829 |
| Mgll    | -0.693 | -0.120 | 0.813 |
| Mia2_2  | -0.581 | -0.164 | 0.745 |
| Mia3    | -0.492 | -0.253 | 0.745 |
| Micu2   | -0.532 | -0.173 | 0.706 |
| Micu3   | -0.602 | -0.219 | 0.821 |
| Mid2    | -0.662 | -0.292 | 0.954 |
| Milr1   | -0.789 | -0.174 | 0.963 |
| Minos1  | -0.546 | -0.432 | 0.978 |
| Mios    | -0.592 | -0.127 | 0.719 |
| Mir22hg | -0.670 | -0.070 | 0.741 |
| Mitf    | -0.744 | -0.049 | 0.793 |
| Mkks    | -0.745 | -0.099 | 0.844 |
| Mkl2    | -0.723 | -0.135 | 0.858 |
| Mllt1   | -0.580 | -0.165 | 0.745 |
| Mlx     | -0.630 | -0.208 | 0.838 |
| Mmadhc  | -0.621 | -0.237 | 0.858 |
| Mmd     | -0.702 | -0.205 | 0.906 |
| Mmp14   | -0.743 | -0.051 | 0.794 |
| Mmrn2   | -0.561 | -0.240 | 0.801 |
| Mob1b   | -0.685 | -0.075 | 0.760 |
| Mob3a   | -0.894 | 0.015  | 0.879 |
| Mocs1   | -0.575 | -0.233 | 0.808 |
| Mocs2   | -0.535 | -0.246 | 0.781 |
| Morf4l2 | -0.553 | -0.164 | 0.718 |
| Mospd1  | -0.790 | -0.073 | 0.863 |
| Mpc2    | -0.602 | -0.285 | 0.887 |
| Mpeg1   | -0.737 | -0.051 | 0.788 |

|          |        |        |       |
|----------|--------|--------|-------|
| Mphosph6 | -0.490 | -0.272 | 0.762 |
| Mpl      | -0.585 | -0.359 | 0.944 |
| Mpp5     | -0.583 | -0.146 | 0.729 |
| Mpp6     | -0.686 | -0.146 | 0.832 |
| Mpv17    | -0.707 | -0.082 | 0.790 |
| Mras     | -0.751 | 0.025  | 0.726 |
| Mrc2     | -0.699 | -0.077 | 0.776 |
| Mrpl13   | -0.672 | -0.273 | 0.945 |
| Mrpl2    | -0.607 | -0.400 | 1.007 |
| Mrpl23   | -0.835 | -0.090 | 0.925 |
| Mrpl3    | -0.536 | -0.169 | 0.705 |
| Mrpl33   | -0.631 | -0.280 | 0.911 |
| Mrpl34   | -0.559 | -0.173 | 0.732 |
| Mrpl35   | -0.797 | -0.125 | 0.921 |
| Mrpl40   | -0.667 | -0.260 | 0.926 |
| Mrpl46   | -0.534 | -0.367 | 0.901 |
| Mrpl47   | -0.843 | 0.004  | 0.839 |
| Mrpl49   | -0.587 | -0.145 | 0.732 |
| Mrpl57   | -0.684 | -0.191 | 0.875 |
| Mrps11   | -0.797 | -0.035 | 0.832 |
| Mrps12   | -0.589 | -0.339 | 0.928 |
| Mrps16   | -0.496 | -0.387 | 0.884 |
| Mrps18b  | -0.626 | -0.287 | 0.914 |
| Mrps2    | -0.535 | -0.202 | 0.737 |
| Mrps21   | -0.588 | -0.236 | 0.824 |
| Mrps22   | -0.511 | -0.261 | 0.772 |
| Mrps23   | -0.635 | -0.155 | 0.790 |
| Mrps24   | -0.618 | -0.120 | 0.737 |
| Mrps28   | -0.560 | -0.207 | 0.767 |
| Mrps30   | -0.859 | -0.039 | 0.898 |
| Mrps31   | -0.597 | -0.213 | 0.810 |
| Mrps34   | -0.567 | -0.237 | 0.805 |
| Mrps5    | -0.542 | -0.248 | 0.791 |
| Mrps7    | -0.630 | -0.188 | 0.817 |
| Mrrf     | -0.700 | -0.225 | 0.924 |
| Mrto4    | -0.594 | -0.166 | 0.760 |
| Ms4a6b   | -0.701 | -0.100 | 0.801 |
| Msmo1    | -0.537 | -0.314 | 0.851 |
| Msn      | -0.668 | -0.245 | 0.913 |
| Msra     | -0.645 | -0.283 | 0.928 |
| Msrb1    | -0.522 | -0.237 | 0.759 |
| Msrb3    | -0.608 | -0.155 | 0.763 |
| Mtap     | -0.762 | -0.120 | 0.882 |
| Mtap7d3  | -0.534 | -0.243 | 0.777 |
| Mtch2    | -0.714 | -0.118 | 0.832 |
| Mthfd1   | -0.522 | -0.271 | 0.793 |
| Mthfd2l  | -0.632 | -0.045 | 0.677 |
| Mtm1     | -0.670 | -0.134 | 0.804 |
| Mtmr1    | -0.588 | -0.243 | 0.831 |
| Mtmr10   | -0.651 | -0.179 | 0.830 |
| Mtmr2    | -0.623 | -0.286 | 0.908 |
| Mtmr9    | -0.648 | -0.188 | 0.837 |
| Mtpap    | -0.591 | -0.211 | 0.802 |
| Mtpn     | -0.749 | -0.199 | 0.948 |
| Mtrr     | -0.712 | -0.117 | 0.829 |
| Mum1l1   | -0.527 | -0.235 | 0.761 |

|         |        |        |       |
|---------|--------|--------|-------|
| Mustn1  | -0.497 | -0.266 | 0.764 |
| Mut     | -0.547 | -0.261 | 0.808 |
| Mvd     | -0.846 | 0.076  | 0.770 |
| Mvp     | -0.472 | -0.308 | 0.780 |
| Mxra8   | -0.647 | -0.153 | 0.800 |
| Mybbp1a | -0.655 | -0.220 | 0.876 |
| Myc     | -0.810 | -0.029 | 0.839 |
| Myd88   | -0.557 | -0.270 | 0.827 |
| Mydgf   | -0.652 | -0.271 | 0.924 |
| Myh10   | -0.645 | -0.243 | 0.889 |
| Myl6    | -0.630 | -0.350 | 0.980 |
| Mynn    | -0.607 | -0.120 | 0.726 |
| Myo1b   | -0.548 | -0.163 | 0.712 |
| Myo1c   | -0.531 | -0.213 | 0.745 |
| Myo1d   | -0.517 | -0.260 | 0.777 |
| Myof    | -0.602 | -0.183 | 0.785 |
| Myzap   | -0.654 | -0.229 | 0.883 |
| Mzt1    | -0.935 | 0.160  | 0.775 |
| N6amt1  | -0.771 | -0.058 | 0.829 |
| Naa50   | -0.794 | -0.142 | 0.935 |
| Naalad2 | -0.968 | 0.126  | 0.842 |
| Naca    | -0.766 | -0.166 | 0.933 |
| Nacc1   | -0.569 | -0.172 | 0.741 |
| Nadk    | -0.507 | -0.227 | 0.735 |
| Naip2   | -0.665 | -0.046 | 0.711 |
| Nalcn   | -0.609 | -0.081 | 0.689 |
| Nans    | -0.594 | -0.203 | 0.797 |
| Nap1l1  | -0.663 | -0.208 | 0.871 |
| Nars    | -0.565 | -0.163 | 0.728 |
| Nat2    | -0.724 | -0.036 | 0.760 |
| Natd1   | -0.732 | -0.101 | 0.833 |
| Naxd    | -0.595 | -0.336 | 0.931 |
| Nbeal1  | -0.554 | -0.149 | 0.703 |
| Nbn     | -0.588 | -0.214 | 0.803 |
| Nceh1   | -0.560 | -0.200 | 0.760 |
| Ncf2    | -0.677 | 0.014  | 0.663 |
| Nck1    | -0.779 | -0.133 | 0.912 |
| Ncoa1   | -0.548 | -0.226 | 0.774 |
| Ncoa4   | -0.629 | -0.345 | 0.974 |
| Ncoa6   | -0.637 | -0.111 | 0.749 |
| Ncstn   | -0.584 | -0.126 | 0.710 |
| Ndc1    | -0.791 | -0.163 | 0.954 |
| Nde1    | -0.669 | 0.022  | 0.647 |
| Ndel1   | -0.674 | -0.100 | 0.774 |
| Ndfip1  | -0.606 | -0.189 | 0.795 |
| Ndfip2  | -0.614 | -0.139 | 0.753 |
| Ndrp3   | -0.656 | -0.092 | 0.748 |
| Ndufa1  | -0.632 | -0.373 | 1.005 |
| Ndufa10 | -0.632 | -0.240 | 0.871 |
| Ndufa13 | -0.613 | -0.282 | 0.895 |
| Ndufa2  | -0.571 | -0.326 | 0.896 |
| Ndufa3  | -0.691 | -0.093 | 0.784 |
| Ndufa5  | -0.591 | -0.196 | 0.787 |
| Ndufa6  | -0.787 | -0.180 | 0.967 |
| Ndufab1 | -0.559 | -0.171 | 0.731 |
| Ndufaf1 | -0.598 | -0.258 | 0.855 |

|         |        |        |       |
|---------|--------|--------|-------|
| Ndufb10 | -0.514 | -0.354 | 0.868 |
| Ndufb2  | -0.668 | -0.159 | 0.827 |
| Ndufs3  | -0.523 | -0.268 | 0.791 |
| Ndufv2  | -0.675 | -0.342 | 1.017 |
| Nefl    | -0.541 | -0.164 | 0.705 |
| Necap1  | -0.713 | -0.055 | 0.768 |
| Nedd1   | -0.586 | -0.317 | 0.903 |
| Nedd9   | -0.817 | -0.050 | 0.866 |
| Nek6    | -0.685 | -0.135 | 0.820 |
| Nf1     | -0.646 | -0.109 | 0.756 |
| Nfam1   | -0.680 | -0.030 | 0.710 |
| Nfe2l2  | -0.660 | -0.276 | 0.937 |
| Nfia    | -0.556 | -0.152 | 0.708 |
| Nfkbia  | -0.655 | -0.143 | 0.798 |
| Nfkbib  | -0.539 | -0.183 | 0.722 |
| Nfu1    | -0.591 | -0.308 | 0.899 |
| Nfyb    | -0.794 | -0.007 | 0.801 |
| Nfyc    | -0.594 | -0.242 | 0.836 |
| Nhlrc2  | -0.535 | -0.230 | 0.765 |
| Nhp2    | -0.640 | -0.361 | 1.001 |
| Nhp2l1  | -0.540 | -0.379 | 0.919 |
| Nid1    | -0.832 | -0.106 | 0.938 |
| Nid2    | -0.759 | 0.031  | 0.727 |
| Nif3l1  | -0.592 | -0.234 | 0.826 |
| Nifk    | -0.636 | -0.037 | 0.674 |
| Ninj1   | -0.708 | -0.226 | 0.934 |
| Nip7    | -0.587 | -0.149 | 0.736 |
| Nipa2   | -0.669 | -0.076 | 0.745 |
| Nkain4  | -0.617 | -0.289 | 0.906 |
| Nkd1    | -0.526 | -0.270 | 0.796 |
| Nkiras2 | -0.556 | -0.213 | 0.769 |
| Nkrf    | -0.648 | -0.155 | 0.803 |
| Nmd3    | -0.718 | -0.051 | 0.769 |
| Nme3    | -0.531 | -0.198 | 0.729 |
| Nme6    | -0.709 | -0.237 | 0.946 |
| Noc4l   | -0.727 | -0.004 | 0.731 |
| Nol3    | -0.460 | -0.332 | 0.792 |
| Nol8    | -0.738 | -0.049 | 0.787 |
| Nolc1   | -0.654 | -0.247 | 0.901 |
| Nop16   | -0.854 | -0.063 | 0.917 |
| Nop58   | -0.694 | -0.049 | 0.742 |
| Nos3    | -0.665 | -0.025 | 0.691 |
| Notch1  | -0.608 | -0.085 | 0.693 |
| Nox4    | -0.835 | -0.102 | 0.936 |
| Npat    | -0.582 | -0.176 | 0.758 |
| Npc1    | -0.681 | -0.201 | 0.882 |
| Npl     | -0.650 | -0.297 | 0.947 |
| Nptn    | -0.741 | -0.225 | 0.966 |
| Nptxr   | -0.553 | -0.230 | 0.782 |
| Npy1r   | -0.682 | -0.180 | 0.862 |
| Nqo2    | -0.592 | -0.312 | 0.904 |
| Nrcam   | -0.674 | 0.018  | 0.656 |
| Nrg1    | -0.660 | 0.002  | 0.658 |
| Nrip1   | -0.650 | -0.063 | 0.713 |
| Nrip3   | -0.684 | -0.309 | 0.992 |
| Nrm     | -0.762 | 0.075  | 0.688 |

|         |        |        |       |
|---------|--------|--------|-------|
| Nsa2    | -0.713 | -0.205 | 0.918 |
| Nsf     | -0.628 | -0.168 | 0.796 |
| Nsmce1  | -0.580 | -0.428 | 1.008 |
| Nsmce4a | -0.693 | -0.141 | 0.834 |
| Nsun2   | -0.576 | -0.230 | 0.806 |
| Nsun3   | -0.783 | -0.089 | 0.872 |
| Nt5c3   | -0.711 | -0.139 | 0.850 |
| Ntan1   | -0.913 | 0.101  | 0.811 |
| Ntn1    | -0.640 | -0.265 | 0.905 |
| Ntn4    | -0.537 | -0.204 | 0.741 |
| Ntrk2   | -0.701 | 0.002  | 0.699 |
| Nubp2   | -0.630 | -0.095 | 0.725 |
| Nubpl   | -0.534 | -0.177 | 0.711 |
| Nucb1   | -0.695 | -0.233 | 0.928 |
| Nucb2   | -0.728 | -0.241 | 0.969 |
| Nucks1  | -0.598 | -0.157 | 0.755 |
| Nudcd1  | -0.783 | -0.067 | 0.849 |
| Nudt19  | -0.624 | -0.051 | 0.674 |
| Nudt21  | -0.582 | -0.163 | 0.745 |
| Nudt5   | -0.604 | -0.110 | 0.714 |
| Nudt9   | -0.543 | -0.316 | 0.859 |
| Numb    | -0.653 | -0.110 | 0.763 |
| Nup153  | -0.659 | -0.134 | 0.794 |
| Nup155  | -0.609 | -0.150 | 0.758 |
| Nup160  | -0.682 | -0.137 | 0.819 |
| Nup205  | -0.553 | -0.235 | 0.788 |
| Nup35   | -0.752 | -0.065 | 0.817 |
| Nup54   | -0.646 | -0.111 | 0.757 |
| Nupl1   | -0.605 | -0.130 | 0.735 |
| Nus1    | -0.687 | -0.102 | 0.789 |
| Nusap1  | -0.515 | -0.222 | 0.737 |
| Nxpe5   | -0.637 | -0.041 | 0.678 |
| Oas3    | -0.836 | -0.013 | 0.850 |
| Oat     | -0.529 | -0.321 | 0.850 |
| Ociad1  | -0.529 | -0.256 | 0.785 |
| Ogdh    | -0.516 | -0.213 | 0.729 |
| Ogfrl1  | -0.694 | -0.140 | 0.834 |
| Oip5    | -0.841 | 0.003  | 0.837 |
| Ola1    | -0.673 | -0.231 | 0.904 |
| Olfm2   | -0.522 | -0.387 | 0.909 |
| Olfm12b | -0.605 | -0.167 | 0.772 |
| Olfm13  | -0.657 | -0.274 | 0.930 |
| Orai1   | -0.605 | -0.091 | 0.696 |
| Orc2    | -0.571 | -0.230 | 0.801 |
| Orc3    | -0.617 | -0.052 | 0.670 |
| Orc5    | -0.600 | -0.316 | 0.916 |
| Osbpl2  | -0.663 | -0.138 | 0.801 |
| Osbpl8  | -0.597 | -0.159 | 0.755 |
| Osgep   | -0.684 | -0.012 | 0.696 |
| Otub1   | -0.604 | -0.189 | 0.793 |
| Otud6b  | -0.772 | -0.130 | 0.902 |
| Oxnad1  | -0.615 | -0.196 | 0.812 |
| Oxr1    | -0.550 | -0.176 | 0.726 |
| Oxsm    | -0.492 | -0.330 | 0.822 |
| Oxsr1   | -0.521 | -0.202 | 0.723 |
| P2ry10  | -0.730 | 0.067  | 0.663 |

|          |        |        |       |
|----------|--------|--------|-------|
| P2ry2    | -0.708 | 0.055  | 0.653 |
| P3h4     | -0.558 | -0.251 | 0.810 |
| P4ha1    | -0.642 | -0.176 | 0.818 |
| P4hb     | -0.669 | -0.257 | 0.927 |
| Pa2g4    | -0.577 | -0.242 | 0.819 |
| Pacsin2  | -0.581 | -0.242 | 0.823 |
| Pafah1b2 | -0.704 | -0.183 | 0.887 |
| Paics    | -0.582 | -0.247 | 0.829 |
| Paip1    | -0.558 | -0.190 | 0.748 |
| Pak1ip1  | -0.565 | -0.263 | 0.828 |
| Pak4     | -0.533 | -0.270 | 0.804 |
| Pak6     | -0.744 | 0.026  | 0.718 |
| Palld    | -0.668 | -0.042 | 0.710 |
| Papd4    | -0.480 | -0.293 | 0.773 |
| Papln    | -0.902 | 0.118  | 0.784 |
| Papola   | -0.618 | -0.126 | 0.744 |
| Papolg   | -0.721 | 0.000  | 0.721 |
| Papss2   | -0.585 | -0.308 | 0.893 |
| Pard6g   | -0.614 | -0.165 | 0.779 |
| Park7    | -0.589 | -0.318 | 0.907 |
| Parp16   | -0.756 | -0.027 | 0.783 |
| Parva    | -0.534 | -0.225 | 0.759 |
| Parvb    | -0.615 | -0.134 | 0.748 |
| Pbdc1    | -0.750 | 0.049  | 0.701 |
| Pcbp2    | -0.761 | -0.185 | 0.946 |
| Pcgf3    | -0.714 | -0.076 | 0.790 |
| Pcnp     | -0.598 | -0.138 | 0.736 |
| Pcolce   | -0.637 | -0.217 | 0.854 |
| Pdcd10   | -0.710 | -0.111 | 0.821 |
| Pdcd2    | -0.791 | -0.148 | 0.939 |
| Pdcd6ip  | -0.565 | -0.146 | 0.711 |
| Pdcl     | -0.527 | -0.282 | 0.809 |
| Pdcl3    | -0.570 | -0.188 | 0.758 |
| Pde10a   | -0.699 | 0.041  | 0.658 |
| Pde12    | -0.629 | -0.150 | 0.779 |
| Pde1a    | -0.764 | -0.084 | 0.848 |
| Pde7b    | -0.599 | -0.323 | 0.922 |
| Pde8a    | -0.493 | -0.276 | 0.769 |
| Pde9a    | -0.586 | -0.172 | 0.758 |
| Pdhx     | -0.535 | -0.204 | 0.739 |
| Pdia5    | -0.725 | 0.040  | 0.685 |
| Pdia6    | -0.641 | -0.276 | 0.917 |
| Pdk3     | -0.529 | -0.383 | 0.912 |
| Pdlim1   | -0.568 | -0.186 | 0.754 |
| Pdlim5   | -0.703 | -0.046 | 0.749 |
| Pdzrn3   | -0.690 | -0.050 | 0.740 |
| Pea15a   | -0.664 | -0.186 | 0.851 |
| Peak1    | -0.646 | -0.126 | 0.772 |
| Pebp1    | -0.536 | -0.225 | 0.761 |
| Pecam1   | -0.735 | -0.243 | 0.977 |
| Pef1     | -0.596 | -0.316 | 0.911 |
| Peli2    | -0.808 | -0.073 | 0.880 |
| Pex11a   | -0.650 | -0.119 | 0.769 |
| Pex13    | -0.719 | -0.067 | 0.785 |
| Pex2     | -0.699 | -0.177 | 0.876 |
| Pex3     | -0.754 | -0.043 | 0.797 |

|          |        |        |       |
|----------|--------|--------|-------|
| Pfdn1    | -0.559 | -0.148 | 0.707 |
| Pfdn5    | -0.595 | -0.264 | 0.859 |
| Pfdn6    | -0.568 | -0.309 | 0.876 |
| Pgam1    | -0.726 | -0.246 | 0.972 |
| Pgd      | -0.577 | -0.232 | 0.809 |
| Pgf      | -0.628 | -0.427 | 1.055 |
| Pgm3     | -0.580 | -0.139 | 0.719 |
| Pgrmc1   | -0.640 | -0.307 | 0.947 |
| Phax     | -0.643 | -0.234 | 0.877 |
| Phc2     | -0.617 | -0.108 | 0.725 |
| Phf6     | -0.706 | 0.038  | 0.668 |
| Phlda1   | -0.684 | -0.270 | 0.954 |
| Pigh     | -0.664 | -0.112 | 0.776 |
| Pigw     | -0.956 | 0.140  | 0.815 |
| Pigx     | -0.771 | -0.096 | 0.866 |
| Pik3c2a  | -0.609 | -0.159 | 0.768 |
| Pik3ca   | -0.574 | -0.136 | 0.711 |
| Pik3cg   | -0.702 | -0.093 | 0.795 |
| Pilra    | -0.694 | -0.161 | 0.855 |
| Pin1     | -0.740 | -0.093 | 0.833 |
| Pip4k2c  | -0.534 | -0.190 | 0.725 |
| Pip5k1b  | -0.497 | -0.258 | 0.755 |
| Pirb     | -0.666 | 0.001  | 0.666 |
| Pitpna   | -0.612 | -0.155 | 0.766 |
| Pitpnb   | -0.575 | -0.190 | 0.766 |
| Pitrm1   | -0.587 | -0.292 | 0.880 |
| Piwil2   | -0.767 | -0.057 | 0.824 |
| Pja2     | -0.575 | -0.190 | 0.765 |
| Pkd2     | -0.696 | -0.121 | 0.818 |
| Pkhd1l1  | -0.762 | -0.138 | 0.899 |
| Pkib     | -0.710 | -0.029 | 0.739 |
| Pkm      | -0.589 | -0.247 | 0.836 |
| Pla2g12a | -0.582 | -0.187 | 0.769 |
| Plaa     | -0.647 | -0.170 | 0.818 |
| Plac8    | -0.651 | -0.177 | 0.827 |
| Plac9b   | -0.606 | -0.242 | 0.848 |
| Plag1    | -0.722 | -0.161 | 0.883 |
| Plbd1    | -0.649 | -0.156 | 0.806 |
| Plbd2    | -0.602 | -0.219 | 0.821 |
| Plcb4    | -0.508 | -0.224 | 0.732 |
| Pld3     | -0.575 | -0.286 | 0.861 |
| Plek     | -0.721 | -0.189 | 0.910 |
| Plekha3  | -0.822 | -0.023 | 0.845 |
| Plekhf2  | -0.577 | -0.175 | 0.752 |
| Plet1    | -0.648 | -0.426 | 1.074 |
| Plod1    | -0.804 | -0.082 | 0.886 |
| Plod2    | -0.792 | -0.103 | 0.895 |
| Plod3    | -0.598 | -0.134 | 0.733 |
| Plp2     | -0.659 | -0.233 | 0.892 |
| Plpp3    | -0.537 | -0.265 | 0.802 |
| Plpp5    | -0.601 | -0.128 | 0.728 |
| Plscr4   | -0.631 | -0.210 | 0.841 |
| Plvap    | -0.690 | -0.179 | 0.869 |
| Pmpcb    | -0.630 | -0.207 | 0.837 |
| Pnp      | -0.710 | -0.300 | 1.010 |
| Pnpla8   | -0.669 | -0.191 | 0.861 |

|          |        |        |       |
|----------|--------|--------|-------|
| Pnpt1    | -0.689 | -0.095 | 0.784 |
| Pnrc2    | -0.720 | -0.157 | 0.877 |
| Poc1a    | -0.619 | -0.089 | 0.708 |
| Podxl    | -0.724 | -0.142 | 0.867 |
| Pold2    | -0.606 | -0.309 | 0.915 |
| Pole2    | -0.754 | -0.095 | 0.849 |
| Pole3    | -0.619 | -0.258 | 0.877 |
| Polh     | -0.560 | -0.300 | 0.860 |
| Polr1a   | -0.618 | -0.145 | 0.763 |
| Polr2b   | -0.556 | -0.251 | 0.807 |
| Polr2e   | -0.603 | -0.315 | 0.919 |
| Polr2f   | -0.520 | -0.208 | 0.728 |
| Polr2i   | -0.554 | -0.311 | 0.865 |
| Polr2m   | -0.567 | -0.297 | 0.864 |
| Polr3f   | -0.515 | -0.214 | 0.728 |
| Polr3k   | -0.730 | -0.062 | 0.792 |
| Pom121   | -0.585 | -0.129 | 0.714 |
| Pomgnt2  | -0.772 | -0.113 | 0.884 |
| Pomp     | -0.556 | -0.280 | 0.836 |
| Pon2     | -0.688 | -0.202 | 0.890 |
| Pon3     | -0.546 | -0.358 | 0.904 |
| Pop4     | -0.734 | -0.227 | 0.960 |
| Popdc2   | -0.546 | -0.218 | 0.764 |
| Pou2af1  | -0.896 | 0.088  | 0.809 |
| Pou2f1   | -0.735 | -0.040 | 0.775 |
| Pparg    | -0.600 | -0.269 | 0.869 |
| Ppbp     | -0.552 | -0.257 | 0.809 |
| Pphln1   | -0.515 | -0.239 | 0.754 |
| Ppil3    | -0.568 | -0.285 | 0.854 |
| Ppm1f    | -0.657 | -0.181 | 0.838 |
| Ppm1g    | -0.608 | -0.143 | 0.750 |
| Ppp1cb   | -0.610 | -0.159 | 0.769 |
| Ppp1r14b | -0.795 | -0.139 | 0.933 |
| Ppp1r15a | -0.709 | -0.180 | 0.889 |
| Ppp1r3a  | -0.599 | -0.171 | 0.770 |
| Ppp1r7   | -0.761 | -0.153 | 0.914 |
| Ppp2cb   | -0.660 | -0.196 | 0.855 |
| Ppp2r1a  | -0.576 | -0.284 | 0.860 |
| Ppp2r2a  | -0.673 | -0.064 | 0.736 |
| Ppp2r2d  | -0.633 | -0.083 | 0.716 |
| Ppp2r3a  | -0.531 | -0.198 | 0.729 |
| Ppp2r3c  | -0.731 | -0.079 | 0.810 |
| Ppp2r5d  | -0.661 | -0.120 | 0.781 |
| Ppp3r1   | -0.564 | -0.209 | 0.773 |
| Ppp6c    | -0.617 | -0.242 | 0.859 |
| Pqbp1    | -0.691 | -0.167 | 0.858 |
| Pqlc3    | -0.773 | -0.161 | 0.934 |
| Pradc1   | -0.755 | 0.040  | 0.715 |
| Prcp     | -0.838 | 0.028  | 0.810 |
| Prdm4    | -0.686 | -0.101 | 0.786 |
| Prdx4    | -0.717 | -0.132 | 0.849 |
| Prdx5    | -0.503 | -0.275 | 0.778 |
| Prdx6    | -0.523 | -0.253 | 0.777 |
| Prelid1  | -0.595 | -0.117 | 0.711 |
| Prep     | -0.552 | -0.271 | 0.823 |
| Prex2    | -0.541 | -0.186 | 0.727 |



|         |        |        |       |
|---------|--------|--------|-------|
| Prim1   | -0.826 | 0.112  | 0.714 |
| Prkaa1  | -0.517 | -0.267 | 0.784 |
| Prkab1  | -0.558 | -0.220 | 0.777 |
| Prkaca  | -0.543 | -0.231 | 0.773 |
| Prkag1  | -0.685 | -0.187 | 0.872 |
| Prkar2a | -0.544 | -0.187 | 0.731 |
| Prkca   | -0.612 | -0.287 | 0.899 |
| Prkci   | -0.597 | -0.188 | 0.785 |
| Prkcsh  | -0.580 | -0.175 | 0.755 |
| Prkd3   | -0.593 | -0.180 | 0.773 |
| Prkx    | -0.673 | -0.129 | 0.803 |
| Prmt5   | -0.595 | -0.253 | 0.848 |
| Procr   | -0.918 | 0.065  | 0.853 |
| Prorsd1 | -0.832 | -0.037 | 0.870 |
| Pros1   | -0.812 | -0.145 | 0.958 |
| Prpf19  | -0.566 | -0.234 | 0.800 |
| Prpf40a | -0.696 | -0.201 | 0.897 |
| Prpf8   | -0.736 | -0.239 | 0.975 |
| Prps1   | -0.745 | -0.235 | 0.980 |
| Prps2   | -0.644 | -0.168 | 0.813 |
| Prr11   | -0.495 | -0.346 | 0.841 |
| Prr13   | -0.555 | -0.470 | 1.025 |
| Prr15l  | -0.569 | -0.356 | 0.925 |
| Prr16   | -0.725 | 0.065  | 0.659 |
| Prr5    | -0.772 | 0.005  | 0.767 |
| Prrg1   | -0.545 | -0.215 | 0.760 |
| Prrt4   | -0.779 | -0.195 | 0.974 |
| Prune2  | -0.722 | 0.019  | 0.704 |
| Prx     | -0.575 | -0.150 | 0.725 |
| Psen1   | -0.695 | -0.290 | 0.985 |
| Psenen  | -0.510 | -0.266 | 0.777 |
| Psip1   | -0.497 | -0.243 | 0.740 |
| Psma3   | -0.670 | -0.252 | 0.922 |
| Psma7   | -0.620 | -0.197 | 0.817 |
| Psemb4  | -0.701 | -0.291 | 0.992 |
| Psemb5  | -0.571 | -0.415 | 0.987 |
| Psemb6  | -0.600 | -0.394 | 0.994 |
| Psemb8  | -0.565 | -0.260 | 0.825 |
| Psmc1   | -0.670 | -0.282 | 0.952 |
| Psmc3   | -0.604 | -0.277 | 0.881 |
| Psmc4   | -0.643 | -0.287 | 0.930 |
| Psmc5   | -0.590 | -0.277 | 0.867 |
| Psmc6   | -0.707 | -0.228 | 0.935 |
| Psmc1   | -0.564 | -0.215 | 0.779 |
| Psmc11  | -0.653 | -0.126 | 0.780 |
| Psmc14  | -0.696 | -0.317 | 1.014 |
| Psmc2   | -0.518 | -0.202 | 0.720 |
| Psmc6   | -0.577 | -0.144 | 0.720 |
| Psmc7   | -0.536 | -0.208 | 0.743 |
| Psmc8   | -0.537 | -0.303 | 0.840 |
| Psmc2   | -0.610 | -0.389 | 0.999 |
| Psmc4   | -0.579 | -0.139 | 0.718 |
| Psmg2   | -0.583 | -0.199 | 0.782 |
| Psph    | -0.602 | -0.136 | 0.738 |
| Pstk    | -0.739 | 0.002  | 0.737 |
| Pstpip2 | -0.498 | -0.279 | 0.776 |

|         |        |        |       |
|---------|--------|--------|-------|
| Ptar1   | -0.644 | -0.204 | 0.848 |
| Ptbp1   | -0.666 | -0.285 | 0.950 |
| Ptbp3   | -0.754 | -0.113 | 0.867 |
| Pten    | -0.610 | -0.143 | 0.752 |
| Pter    | -0.693 | -0.256 | 0.949 |
| Ptgdr2  | -1.060 | 0.222  | 0.838 |
| Ptges3  | -0.656 | -0.197 | 0.853 |
| Ptgis   | -0.654 | -0.371 | 1.026 |
| Ptk7    | -0.708 | -0.119 | 0.827 |
| Ptp4a1  | -0.769 | -0.166 | 0.935 |
| Ptp4a2  | -0.583 | -0.150 | 0.733 |
| Ptpn12  | -0.727 | -0.129 | 0.856 |
| Ptpn2   | -0.589 | -0.147 | 0.736 |
| Ptpra   | -0.649 | -0.235 | 0.885 |
| Ptprg   | -0.598 | -0.231 | 0.829 |
| Ptprj   | -0.760 | -0.139 | 0.899 |
| Ptprk   | -0.542 | -0.222 | 0.764 |
| Pttg1ip | -0.609 | -0.067 | 0.676 |
| Puf60   | -0.660 | -0.198 | 0.858 |
| Pum2    | -0.719 | -0.153 | 0.872 |
| Purb    | -0.689 | -0.055 | 0.744 |
| Pus1    | -0.653 | -0.034 | 0.686 |
| Pus7l   | -0.529 | -0.279 | 0.808 |
| Pvr     | -0.696 | -0.034 | 0.730 |
| Pwp1    | -0.515 | -0.359 | 0.874 |
| Pxdc1   | -0.761 | -0.076 | 0.837 |
| Pxdn    | -0.655 | -0.227 | 0.882 |
| Pycard  | -0.650 | -0.167 | 0.817 |
| Pycr1   | -0.592 | -0.255 | 0.847 |
| Pyroxd1 | -0.537 | -0.213 | 0.750 |
| Pyurf   | -0.877 | 0.052  | 0.825 |
| Qk      | -0.737 | -0.157 | 0.893 |
| Qser1   | -0.646 | -0.085 | 0.731 |
| Qsox1   | -0.682 | -0.109 | 0.791 |
| Qsox2   | -0.663 | -0.293 | 0.956 |
| Rab12   | -0.740 | -0.207 | 0.947 |
| Rab14   | -0.541 | -0.174 | 0.715 |
| Rab18   | -0.782 | -0.173 | 0.955 |
| Rab1a   | -0.835 | -0.065 | 0.901 |
| Rab21   | -0.643 | -0.207 | 0.850 |
| Rab27a  | -0.631 | -0.175 | 0.807 |
| Rab29   | -0.589 | -0.151 | 0.740 |
| Rab2a   | -0.713 | -0.175 | 0.888 |
| Rab32   | -0.861 | -0.037 | 0.897 |
| Rab33b  | -0.593 | -0.180 | 0.773 |
| Rab35   | -0.692 | -0.150 | 0.841 |
| Rab3c   | -0.674 | -0.295 | 0.969 |
| Rab4a   | -0.752 | 0.054  | 0.698 |
| Rab5a   | -0.761 | -0.206 | 0.967 |
| Rab5b   | -0.551 | -0.233 | 0.784 |
| Rab8a   | -0.631 | -0.194 | 0.825 |
| Rab8b   | -0.759 | -0.083 | 0.843 |
| Rab9    | -0.551 | -0.239 | 0.789 |
| Rabac1  | -0.540 | -0.344 | 0.884 |
| Rabepk  | -0.620 | -0.314 | 0.935 |
| Rabif   | -0.728 | -0.117 | 0.846 |

|          |        |        |       |
|----------|--------|--------|-------|
| Rabl3    | -0.664 | -0.224 | 0.889 |
| Rac2     | -0.790 | -0.030 | 0.820 |
| Rack1    | -0.631 | -0.065 | 0.696 |
| Rad1     | -0.692 | 0.042  | 0.650 |
| Rad17    | -0.660 | -0.162 | 0.822 |
| Rad18    | -0.521 | -0.243 | 0.763 |
| Rad23b   | -0.677 | -0.188 | 0.865 |
| Rai2     | -0.535 | -0.295 | 0.829 |
| Rala     | -0.641 | -0.159 | 0.800 |
| Ralgapb  | -0.573 | -0.140 | 0.712 |
| Ran      | -0.631 | -0.190 | 0.821 |
| Ranbp2   | -0.594 | -0.118 | 0.712 |
| Ranbp9   | -0.657 | 0.008  | 0.649 |
| Rap1gds1 | -0.724 | -0.125 | 0.850 |
| Rap2b    | -0.851 | 0.040  | 0.811 |
| Rapgef5  | -0.724 | -0.086 | 0.810 |
| Raph1    | -0.737 | -0.056 | 0.793 |
| Rars     | -0.687 | -0.210 | 0.896 |
| Rasl10b  | -0.712 | -0.176 | 0.889 |
| Rassf1   | -0.624 | -0.078 | 0.702 |
| Rbbp4    | -0.622 | -0.093 | 0.715 |
| Rbbp9    | -0.765 | -0.201 | 0.966 |
| Rbm18    | -0.592 | -0.156 | 0.748 |
| Rbm3     | -0.550 | -0.205 | 0.755 |
| Rbm42    | -0.678 | -0.191 | 0.869 |
| Rbm48    | -0.723 | -0.029 | 0.752 |
| Rbm4b    | -0.562 | -0.367 | 0.929 |
| Rbm7     | -0.629 | -0.267 | 0.896 |
| Rbms1    | -0.608 | -0.088 | 0.696 |
| Rbms2    | -0.578 | -0.223 | 0.800 |
| Rbmxl1   | -0.621 | -0.285 | 0.905 |
| Rbp1     | -0.693 | -0.109 | 0.802 |
| Rc3h1    | -0.634 | -0.052 | 0.686 |
| Rc3h2    | -0.709 | -0.046 | 0.755 |
| Rcn1     | -0.740 | -0.211 | 0.951 |
| Rcn2     | -0.661 | -0.196 | 0.857 |
| Rcn3     | -0.699 | -0.282 | 0.982 |
| Rdh11    | -0.720 | -0.194 | 0.914 |
| Rdh12    | -0.649 | -0.424 | 1.073 |
| Rdx      | -0.521 | -0.212 | 0.733 |
| Reck     | -0.657 | -0.113 | 0.770 |
| Reep1    | -0.684 | -0.101 | 0.785 |
| Reep5    | -0.708 | -0.156 | 0.864 |
| Rel1     | -0.640 | -0.092 | 0.732 |
| Rer1     | -0.572 | -0.168 | 0.740 |
| Rerg     | -0.713 | -0.016 | 0.729 |
| Rexo2    | -0.590 | -0.178 | 0.768 |
| Rfc4     | -0.548 | -0.279 | 0.826 |
| Rfesd    | -0.464 | -0.338 | 0.802 |
| Rfk      | -0.558 | -0.255 | 0.813 |
| Rgmb     | -0.608 | -0.213 | 0.821 |
| Rhbd1    | -0.786 | 0.075  | 0.711 |
| Rhoa     | -0.578 | -0.288 | 0.866 |
| Rhob     | -0.732 | -0.110 | 0.841 |
| Rictor   | -0.582 | -0.121 | 0.703 |
| Rida     | -0.562 | -0.208 | 0.770 |

|               |        |        |       |
|---------------|--------|--------|-------|
| Rin2          | -0.763 | -0.112 | 0.875 |
| Rin3          | -0.717 | 0.041  | 0.676 |
| Ripk1         | -0.702 | -0.096 | 0.798 |
| Ripk2         | -0.455 | -0.352 | 0.807 |
| Ripk3         | -0.598 | -0.129 | 0.728 |
| Rmdn2         | -0.550 | -0.465 | 1.015 |
| Rnd3          | -0.655 | -0.106 | 0.761 |
| Rnf128        | -0.563 | -0.166 | 0.729 |
| Rnf138        | -0.603 | -0.263 | 0.866 |
| Rnf141        | -0.609 | -0.209 | 0.817 |
| Rnf144b       | -0.542 | -0.244 | 0.785 |
| Rnf2          | -0.936 | 0.078  | 0.858 |
| Rnf217        | -0.609 | -0.112 | 0.721 |
| Rnf219        | -0.681 | 0.009  | 0.673 |
| Rnf34         | -0.606 | -0.102 | 0.708 |
| Rnf7          | -0.517 | -0.206 | 0.723 |
| Rnft1         | -0.701 | -0.106 | 0.807 |
| Ror1          | -0.811 | -0.082 | 0.893 |
| Rora          | -0.585 | -0.213 | 0.798 |
| Rp2           | -0.714 | -0.021 | 0.735 |
| RP23-386F15.2 | -0.458 | -0.366 | 0.824 |
| Rpe           | -0.706 | -0.127 | 0.833 |
| Rpf1          | -0.564 | -0.241 | 0.805 |
| Rpf2          | -0.554 | -0.227 | 0.781 |
| Rpl10a        | -0.833 | -0.024 | 0.857 |
| Rpl11         | -0.680 | -0.264 | 0.944 |
| Rpl12         | -0.816 | -0.119 | 0.934 |
| Rpl13a        | -0.661 | -0.118 | 0.779 |
| Rpl15         | -0.771 | -0.168 | 0.939 |
| Rpl18         | -0.716 | -0.109 | 0.825 |
| Rpl19         | -0.784 | -0.136 | 0.920 |
| Rpl22         | -0.632 | -0.129 | 0.761 |
| Rpl27         | -0.587 | -0.249 | 0.835 |
| Rpl3          | -0.558 | -0.146 | 0.703 |
| Rpl30         | -0.636 | -0.249 | 0.885 |
| Rpl36a        | -0.718 | -0.176 | 0.894 |
| Rpl37a        | -0.555 | -0.286 | 0.841 |
| Rpl4          | -0.590 | -0.143 | 0.734 |
| Rpl41         | -0.648 | -0.227 | 0.875 |
| Rpl6          | -0.733 | -0.212 | 0.945 |
| Rpl7          | -0.714 | -0.162 | 0.876 |
| Rpl8          | -0.649 | -0.165 | 0.814 |
| Rpl9          | -0.577 | -0.142 | 0.718 |
| Rplp0         | -0.697 | -0.186 | 0.883 |
| Rplp1         | -0.573 | -0.172 | 0.745 |
| Rpn1          | -0.675 | -0.161 | 0.836 |
| Rpn2          | -0.715 | -0.261 | 0.976 |
| Rpp14         | -0.649 | -0.079 | 0.728 |
| Rpp38         | -0.687 | -0.169 | 0.856 |
| Rpp40         | -0.709 | -0.260 | 0.969 |
| Rps10         | -0.634 | -0.233 | 0.867 |
| Rps14         | -0.748 | -0.116 | 0.864 |
| Rps19bp1      | -0.621 | -0.379 | 1.000 |
| Rps20         | -0.691 | -0.257 | 0.948 |
| Rps24         | -0.606 | -0.158 | 0.764 |
| Rps27a        | -0.646 | -0.120 | 0.766 |

|         |        |        |       |
|---------|--------|--------|-------|
| Rps4x   | -0.692 | -0.166 | 0.858 |
| Rps5    | -0.702 | -0.106 | 0.808 |
| Rps6    | -0.638 | -0.260 | 0.898 |
| Rps6ka3 | -0.702 | -0.224 | 0.926 |
| Rps7    | -0.817 | -0.139 | 0.957 |
| Rps8    | -0.686 | -0.247 | 0.933 |
| Rpsa    | -0.694 | -0.213 | 0.907 |
| Rraga   | -0.733 | -0.235 | 0.967 |
| Rragc   | -0.614 | -0.185 | 0.798 |
| Rras    | -0.628 | -0.254 | 0.882 |
| Rrbp1   | -0.650 | -0.130 | 0.780 |
| Rrm1    | -0.635 | -0.203 | 0.838 |
| Rrm2b   | -0.702 | -0.091 | 0.792 |
| Rrn3    | -0.694 | -0.212 | 0.906 |
| Rrp15   | -0.512 | -0.278 | 0.790 |
| Rrp8    | -0.634 | -0.196 | 0.830 |
| Rrs1    | -0.601 | -0.144 | 0.745 |
| Rsbn1l  | -0.601 | -0.127 | 0.728 |
| Rsl1d1  | -0.784 | -0.075 | 0.859 |
| Rsu1    | -0.554 | -0.181 | 0.736 |
| Rtca    | -0.644 | -0.233 | 0.877 |
| Rtn1    | -0.691 | -0.066 | 0.758 |
| Rtn4    | -0.673 | -0.110 | 0.783 |
| Rtp4    | -0.691 | -0.057 | 0.749 |
| Rundc3b | -0.668 | -0.116 | 0.784 |
| Ruvbl2  | -0.598 | -0.237 | 0.835 |
| Rwdd1   | -0.538 | -0.177 | 0.715 |
| Rybp    | -0.672 | -0.171 | 0.843 |
| S100a1  | -0.535 | -0.302 | 0.837 |
| S100a13 | -0.534 | -0.234 | 0.768 |
| S1pr2   | -0.558 | -0.162 | 0.720 |
| Samd4b  | -0.712 | -0.132 | 0.844 |
| Samd8   | -0.650 | -0.148 | 0.798 |
| Samsn1  | -0.732 | -0.073 | 0.805 |
| Sar1a   | -0.636 | -0.161 | 0.796 |
| Sar1b   | -0.682 | -0.306 | 0.988 |
| Sars    | -0.580 | -0.136 | 0.715 |
| Sav1    | -0.553 | -0.177 | 0.731 |
| Sbds    | -0.586 | -0.178 | 0.764 |
| Sbf2    | -0.634 | -0.194 | 0.828 |
| Sc5d    | -0.477 | -0.350 | 0.827 |
| Scamp1  | -0.550 | -0.155 | 0.704 |
| Scamp3  | -0.665 | -0.033 | 0.697 |
| Scarb2  | -0.686 | -0.209 | 0.895 |
| Sccpdh  | -0.498 | -0.241 | 0.739 |
| Scfd1   | -0.681 | -0.266 | 0.947 |
| Scnn1a  | -0.698 | -0.311 | 1.009 |
| Scnn1b  | -0.559 | -0.305 | 0.864 |
| Sco1    | -0.669 | -0.066 | 0.736 |
| Scoc    | -0.798 | 0.017  | 0.781 |
| Scp2    | -0.526 | -0.304 | 0.831 |
| Scube1  | -0.726 | -0.037 | 0.763 |
| Scube2  | -0.593 | -0.130 | 0.723 |
| Sdc3    | -0.741 | -0.147 | 0.888 |
| Sdc4    | -0.615 | -0.198 | 0.813 |
| Sdf2    | -0.657 | -0.071 | 0.727 |

|           |        |        |       |
|-----------|--------|--------|-------|
| Sdha      | -0.553 | -0.286 | 0.839 |
| Sdhaf1    | -0.785 | -0.173 | 0.958 |
| Sdhaf2    | -0.645 | -0.086 | 0.731 |
| Sdhb      | -0.696 | -0.276 | 0.972 |
| Sdhd      | -0.559 | -0.175 | 0.733 |
| Sdk2      | -0.519 | -0.239 | 0.758 |
| Sec11c    | -0.606 | -0.096 | 0.701 |
| Sec22b    | -0.503 | -0.236 | 0.738 |
| Sec23a    | -0.659 | -0.228 | 0.887 |
| Sec23b    | -0.551 | -0.319 | 0.870 |
| Sec23ip   | -0.608 | -0.199 | 0.807 |
| Sec24a    | -0.716 | -0.018 | 0.733 |
| Sec24c    | -0.616 | -0.104 | 0.720 |
| Sec31a    | -0.658 | -0.164 | 0.822 |
| Sec61a1   | -0.748 | -0.182 | 0.930 |
| Sec61a2   | -0.678 | 0.037  | 0.641 |
| Sec62     | -0.706 | -0.241 | 0.947 |
| Sec63     | -0.740 | -0.165 | 0.904 |
| Secisbp2l | -0.577 | -0.207 | 0.784 |
| Sectm1b   | -0.687 | -0.339 | 1.026 |
| Seh1l     | -0.676 | -0.126 | 0.803 |
| Selenoi   | -0.689 | -0.028 | 0.717 |
| Selenok   | -0.794 | -0.179 | 0.973 |
| Selenon   | -0.644 | -0.136 | 0.780 |
| Sell      | -0.680 | -0.181 | 0.862 |
| Selplg    | -0.771 | -0.058 | 0.829 |
| Sema3a    | -0.571 | -0.266 | 0.837 |
| Sema3d    | -0.764 | -0.085 | 0.849 |
| Sema3f    | -0.733 | -0.143 | 0.876 |
| Sema3g    | -0.645 | -0.217 | 0.862 |
| Sema4c    | -0.636 | -0.031 | 0.667 |
| Sephs1    | -0.567 | -0.246 | 0.814 |
| Sept10    | -0.759 | -0.181 | 0.940 |
| Sept11    | -0.621 | -0.110 | 0.731 |
| Sept2     | -0.707 | -0.196 | 0.903 |
| Serbp1    | -0.655 | -0.199 | 0.855 |
| Serf2     | -0.692 | -0.293 | 0.984 |
| Serinc2   | -0.609 | -0.134 | 0.743 |
| Serp1     | -0.652 | -0.110 | 0.762 |
| Serpina3h | -0.667 | -0.043 | 0.710 |
| Serpina3i | -0.658 | -0.115 | 0.773 |
| Serpinb6b | -0.681 | -0.217 | 0.898 |
| Serpinb9  | -0.573 | -0.247 | 0.820 |
| Serpine1  | -0.887 | 0.039  | 0.848 |
| Serpine2  | -0.701 | 0.052  | 0.649 |
| Serpinh1  | -0.769 | -0.147 | 0.916 |
| Sertad1   | -0.577 | -0.186 | 0.764 |
| Sertad2   | -0.607 | -0.192 | 0.799 |
| Sertad3   | -0.718 | -0.277 | 0.994 |
| Set       | -0.596 | -0.134 | 0.731 |
| Sf3a2     | -0.792 | -0.107 | 0.899 |
| Sf3a3     | -0.650 | -0.253 | 0.903 |
| Sfr1      | -0.634 | -0.163 | 0.797 |
| Sftpb     | -0.508 | -0.387 | 0.895 |
| Sgcb      | -0.674 | -0.202 | 0.876 |
| Sgce      | -0.693 | -0.243 | 0.936 |

|          |        |        |       |
|----------|--------|--------|-------|
| Sgf29    | -0.714 | -0.034 | 0.748 |
| Sgms1    | -0.702 | -0.106 | 0.808 |
| Sgms2    | -0.558 | -0.265 | 0.823 |
| Sgpl1    | -0.636 | -0.082 | 0.718 |
| Sh2d1a   | -0.575 | -0.249 | 0.825 |
| Sh2d1b1  | -0.921 | 0.122  | 0.799 |
| Sh2d3c   | -0.709 | -0.059 | 0.768 |
| Sh3pxd2a | -0.573 | -0.176 | 0.749 |
| Sh3pxd2b | -0.820 | 0.056  | 0.764 |
| Shc4     | -0.735 | -0.051 | 0.786 |
| Shmt2    | -0.767 | -0.170 | 0.937 |
| Shoc2    | -0.639 | -0.135 | 0.774 |
| Shroom2  | -0.756 | -0.059 | 0.815 |
| Siae     | -0.672 | -0.115 | 0.788 |
| Siah1a   | -0.627 | -0.086 | 0.713 |
| Siah1b   | -0.566 | -0.357 | 0.923 |
| Siglec1  | -0.815 | -0.097 | 0.912 |
| Sigmar1  | -0.603 | -0.352 | 0.955 |
| Sik1     | -0.682 | -0.127 | 0.809 |
| Sirpb1a  | -0.597 | -0.337 | 0.933 |
| Siva1    | -0.486 | -0.297 | 0.783 |
| Ska2     | -0.585 | -0.232 | 0.817 |
| Ska3     | -0.826 | 0.104  | 0.722 |
| Skil     | -0.728 | -0.059 | 0.788 |
| Skiv2l2  | -0.584 | -0.197 | 0.781 |
| Skp1a    | -0.620 | -0.415 | 1.035 |
| Slain2   | -0.613 | -0.101 | 0.714 |
| Slc11a1  | -0.522 | -0.380 | 0.903 |
| Slc12a2  | -0.554 | -0.176 | 0.730 |
| Slc12a8  | -0.828 | 0.034  | 0.794 |
| Slc15a2  | -0.631 | -0.074 | 0.705 |
| Slc15a3  | -0.641 | -0.066 | 0.707 |
| Slc16a1  | -0.650 | -0.257 | 0.907 |
| Slc16a2  | -0.698 | -0.138 | 0.836 |
| Slc16a3  | -0.551 | -0.254 | 0.806 |
| Slc16a9  | -0.529 | -0.275 | 0.804 |
| Slc19a2  | -0.558 | -0.158 | 0.716 |
| Slc25a12 | -0.467 | -0.377 | 0.844 |
| Slc25a17 | -0.548 | -0.183 | 0.731 |
| Slc25a20 | -0.793 | -0.113 | 0.905 |
| Slc25a24 | -0.760 | -0.166 | 0.926 |
| Slc25a4  | -0.605 | -0.234 | 0.839 |
| Slc25a43 | -0.489 | -0.281 | 0.770 |
| Slc25a46 | -0.695 | -0.265 | 0.960 |
| Slc25a51 | -0.647 | -0.162 | 0.810 |
| Slc29a2  | -0.829 | 0.009  | 0.820 |
| Slc29a3  | -0.607 | -0.106 | 0.714 |
| Slc2a1   | -0.772 | 0.011  | 0.761 |
| Slc2a10  | -0.677 | -0.208 | 0.886 |
| Slc2a12  | -0.540 | -0.173 | 0.713 |
| Slc2a13  | -0.556 | -0.216 | 0.772 |
| Slc30a1  | -0.695 | -0.224 | 0.919 |
| Slc30a5  | -0.539 | -0.197 | 0.736 |
| Slc30a6  | -0.685 | -0.289 | 0.974 |
| Slc35a3  | -0.754 | -0.073 | 0.827 |
| Slc35a4  | -0.555 | -0.298 | 0.853 |

|          |        |        |       |
|----------|--------|--------|-------|
| Slc35a5  | -0.801 | -0.105 | 0.907 |
| Slc35b1  | -0.673 | -0.065 | 0.738 |
| Slc35c1  | -0.639 | -0.065 | 0.704 |
| Slc35e1  | -0.560 | -0.202 | 0.763 |
| Slc35f5  | -0.775 | -0.149 | 0.923 |
| Slc35f6  | -0.692 | -0.220 | 0.912 |
| Slc36a4  | -0.677 | -0.110 | 0.787 |
| Slc37a2  | -0.659 | -0.115 | 0.774 |
| Slc38a2  | -0.752 | -0.120 | 0.872 |
| Slc38a5  | -0.586 | -0.205 | 0.791 |
| Slc39a1  | -0.635 | -0.156 | 0.791 |
| Slc39a6  | -0.660 | -0.122 | 0.782 |
| Slc39a7  | -0.503 | -0.231 | 0.734 |
| Slc39a8  | -0.526 | -0.403 | 0.929 |
| Slc3a2   | -0.696 | -0.243 | 0.939 |
| Slc41a2  | -0.748 | -0.204 | 0.953 |
| Slc43a3  | -0.814 | -0.150 | 0.964 |
| Slc44a1  | -0.584 | -0.217 | 0.801 |
| Slc4a11  | -0.538 | -0.238 | 0.775 |
| Slc6a2   | -0.712 | -0.128 | 0.840 |
| Slc6a9   | -0.534 | -0.245 | 0.779 |
| Slc7a1   | -0.785 | -0.108 | 0.893 |
| Slc7a11  | -0.560 | -0.341 | 0.901 |
| Slc7a6   | -0.745 | 0.053  | 0.692 |
| Slc9a6   | -0.629 | -0.222 | 0.851 |
| Slco2a1  | -0.808 | -0.149 | 0.957 |
| Slco2b1  | -0.640 | -0.308 | 0.948 |
| Slco4c1  | -0.545 | -0.223 | 0.769 |
| Slfn5    | -0.726 | -0.045 | 0.770 |
| Slit3    | -0.696 | -0.268 | 0.965 |
| Slmo2    | -0.658 | -0.110 | 0.767 |
| Smap1    | -0.804 | -0.065 | 0.869 |
| Smarca5  | -0.709 | -0.106 | 0.815 |
| Smarce1  | -0.734 | -0.059 | 0.793 |
| Smg8     | -0.625 | -0.323 | 0.949 |
| Smim10l1 | -0.614 | -0.146 | 0.761 |
| Smim11   | -0.496 | -0.349 | 0.845 |
| Smim13   | -0.786 | -0.039 | 0.825 |
| Smim14   | -0.608 | -0.138 | 0.746 |
| Smim15   | -0.835 | -0.082 | 0.917 |
| Smim20   | -0.607 | -0.220 | 0.827 |
| Smim7    | -0.587 | -0.131 | 0.718 |
| Smn1     | -0.559 | -0.177 | 0.737 |
| Smndc1   | -0.545 | -0.217 | 0.762 |
| Smoc2    | -0.690 | -0.281 | 0.972 |
| Smtnl2   | -0.770 | -0.153 | 0.923 |
| Smu1     | -0.564 | -0.191 | 0.754 |
| Smurf2   | -0.625 | -0.193 | 0.818 |
| Smyd5    | -0.555 | -0.156 | 0.711 |
| Snai1    | -0.715 | -0.250 | 0.965 |
| Snap23   | -0.702 | -0.146 | 0.848 |
| Snap29   | -0.764 | -0.128 | 0.892 |
| Snap47   | -0.660 | -0.178 | 0.838 |
| Snapin   | -0.567 | -0.188 | 0.755 |
| Snd1     | -0.608 | -0.122 | 0.731 |
| Snf8     | -0.589 | -0.151 | 0.740 |



|          |        |        |       |
|----------|--------|--------|-------|
| Snrnp200 | -0.557 | -0.216 | 0.772 |
| Snrnp27  | -0.658 | -0.186 | 0.844 |
| Snrpb    | -0.603 | -0.220 | 0.823 |
| Snrpc    | -0.678 | -0.199 | 0.876 |
| Snrpd1   | -0.798 | -0.176 | 0.974 |
| Snrpe    | -0.719 | -0.059 | 0.779 |
| Snta1    | -0.550 | -0.159 | 0.709 |
| Sntg2    | -0.520 | -0.201 | 0.720 |
| Snx1     | -0.667 | -0.154 | 0.821 |
| Snx13    | -0.546 | -0.201 | 0.747 |
| Snx16    | -0.806 | 0.112  | 0.694 |
| Snx2     | -0.690 | -0.218 | 0.908 |
| Snx3     | -0.629 | -0.177 | 0.807 |
| Snx5     | -0.638 | -0.009 | 0.647 |
| Snx6     | -0.751 | -0.132 | 0.883 |
| Snx7     | -0.528 | -0.308 | 0.835 |
| Snx9     | -0.727 | -0.084 | 0.811 |
| Sod1     | -0.507 | -0.408 | 0.915 |
| Sod2     | -0.634 | -0.406 | 1.040 |
| Sod3     | -0.652 | -0.268 | 0.920 |
| Sorbs3   | -0.737 | -0.136 | 0.873 |
| Sos2     | -0.644 | -0.105 | 0.749 |
| Sox18    | -0.498 | -0.241 | 0.739 |
| Sp1      | -0.700 | -0.170 | 0.870 |
| Sp4      | -0.498 | -0.263 | 0.761 |
| Spag7    | -0.562 | -0.241 | 0.803 |
| Spcs2    | -0.627 | -0.278 | 0.905 |
| Spcs3    | -0.625 | -0.115 | 0.739 |
| Speer4c  | -0.806 | 0.073  | 0.732 |
| Spq21    | -0.639 | -0.282 | 0.922 |
| Sphkap   | -0.547 | -0.180 | 0.727 |
| Spi1     | -0.710 | -0.110 | 0.820 |
| Spidr    | -0.573 | -0.222 | 0.795 |
| Spire1   | -0.536 | -0.180 | 0.715 |
| Spon1    | -0.789 | -0.127 | 0.916 |
| Sppl2a   | -0.700 | -0.235 | 0.935 |
| Spred1   | -0.670 | -0.043 | 0.713 |
| Spry2    | -0.652 | -0.170 | 0.821 |
| Spry4    | -0.619 | -0.117 | 0.737 |
| Spryd4   | -0.726 | -0.210 | 0.936 |
| Spryd7   | -0.619 | -0.417 | 1.036 |
| Sptlc2   | -0.610 | -0.135 | 0.744 |
| Spty2d1  | -0.584 | -0.183 | 0.768 |
| Sqstm1   | -0.580 | -0.262 | 0.841 |
| Srek1ip1 | -0.518 | -0.210 | 0.728 |
| Sri      | -0.622 | -0.219 | 0.841 |
| Srp14    | -0.523 | -0.318 | 0.841 |
| Srp19    | -0.606 | -0.137 | 0.744 |
| Srp54b   | -0.602 | -0.115 | 0.718 |
| Srp68    | -0.561 | -0.226 | 0.787 |
| Srp72    | -0.644 | -0.232 | 0.877 |
| Srpr     | -0.620 | -0.297 | 0.917 |
| Srprb    | -0.745 | -0.116 | 0.861 |
| Srxn1    | -0.603 | -0.324 | 0.927 |
| Ss18     | -0.687 | -0.111 | 0.798 |
| Ssb      | -0.679 | -0.126 | 0.805 |

|         |        |        |       |
|---------|--------|--------|-------|
| Ssbp2   | -0.567 | -0.160 | 0.727 |
| Ssh2    | -0.682 | -0.072 | 0.754 |
| Ssr1    | -0.658 | -0.193 | 0.851 |
| Ssr2    | -0.671 | -0.213 | 0.884 |
| Ssr3    | -0.732 | -0.175 | 0.907 |
| Ssrp1   | -0.582 | -0.175 | 0.757 |
| Ssu72   | -0.612 | -0.103 | 0.715 |
| St13    | -0.784 | -0.117 | 0.901 |
| St7     | -0.706 | 0.021  | 0.685 |
| Stag2   | -0.588 | -0.123 | 0.712 |
| Stat3   | -0.692 | -0.119 | 0.811 |
| Stbd1   | -0.610 | -0.119 | 0.729 |
| Steap1  | -0.687 | -0.150 | 0.838 |
| Steap2  | -0.863 | -0.047 | 0.910 |
| Steap4  | -0.458 | -0.380 | 0.838 |
| Stip1   | -0.726 | -0.237 | 0.963 |
| Stk17b  | -0.681 | 0.045  | 0.636 |
| Stk24   | -0.601 | -0.181 | 0.782 |
| Stk32a  | -0.484 | -0.406 | 0.890 |
| Stmn2   | -0.694 | -0.195 | 0.889 |
| Stom    | -0.698 | -0.116 | 0.814 |
| Stoml2  | -0.788 | -0.073 | 0.861 |
| Strap   | -0.617 | -0.278 | 0.895 |
| Strn    | -0.596 | -0.152 | 0.748 |
| Strn3   | -0.641 | -0.144 | 0.785 |
| Stx12   | -0.705 | -0.107 | 0.812 |
| Stx18   | -0.676 | -0.126 | 0.802 |
| Stx7    | -0.769 | -0.112 | 0.882 |
| Sub1    | -0.562 | -0.304 | 0.866 |
| Sucla2  | -0.577 | -0.209 | 0.786 |
| Suc1g1  | -0.595 | -0.297 | 0.892 |
| Sugt1   | -0.545 | -0.285 | 0.829 |
| Sulf1   | -0.789 | 0.007  | 0.782 |
| Sulf2   | -0.673 | -0.042 | 0.715 |
| Sumf2   | -0.700 | -0.022 | 0.723 |
| Sumo1   | -0.616 | -0.142 | 0.758 |
| Sumo2   | -0.567 | -0.376 | 0.942 |
| Suox    | -0.674 | -0.156 | 0.830 |
| Surf4   | -0.607 | -0.203 | 0.810 |
| Svbp    | -0.672 | -0.069 | 0.741 |
| Svip    | -0.543 | -0.324 | 0.867 |
| Swi5    | -0.605 | -0.261 | 0.867 |
| Swt1    | -0.626 | -0.060 | 0.686 |
| Syf2    | -0.607 | -0.162 | 0.770 |
| Syn3    | -0.552 | -0.280 | 0.832 |
| Syngr2  | -0.795 | -0.154 | 0.949 |
| Synj2bp | -0.647 | -0.233 | 0.880 |
| Sypl    | -0.619 | -0.285 | 0.904 |
| Tab3    | -0.612 | -0.114 | 0.727 |
| Tacc1   | -0.663 | -0.139 | 0.802 |
| Tada1   | -0.659 | 0.017  | 0.642 |
| Tada2b  | -0.608 | -0.189 | 0.797 |
| Taf10   | -0.510 | -0.286 | 0.795 |
| Taf5    | -0.812 | -0.046 | 0.857 |
| Taf7    | -0.734 | -0.011 | 0.745 |
| Taldo1  | -0.682 | -0.289 | 0.971 |

|         |        |        |       |
|---------|--------|--------|-------|
| Tank    | -0.681 | -0.039 | 0.720 |
| Tars    | -0.619 | -0.210 | 0.829 |
| Tax1bp1 | -0.619 | -0.253 | 0.872 |
| Tbc1d15 | -0.707 | -0.243 | 0.949 |
| Tbcb    | -0.584 | -0.295 | 0.879 |
| Tbl1x   | -0.507 | -0.273 | 0.780 |
| Tbrg1   | -0.678 | -0.157 | 0.835 |
| Tbx3    | -0.557 | -0.193 | 0.750 |
| Tbx4    | -0.646 | -0.267 | 0.913 |
| Tbx5    | -0.617 | -0.224 | 0.841 |
| Tc2n    | -0.474 | -0.339 | 0.814 |
| Tcea1   | -0.687 | -0.139 | 0.826 |
| Tceal8  | -0.603 | -0.163 | 0.765 |
| Tceb3   | -0.757 | -0.170 | 0.928 |
| Tcf21   | -0.593 | -0.301 | 0.895 |
| Tcp1    | -0.638 | -0.169 | 0.807 |
| Tcta    | -0.511 | -0.271 | 0.782 |
| Tek     | -0.611 | -0.332 | 0.943 |
| Tex10   | -0.626 | -0.132 | 0.758 |
| Tfb2m   | -0.591 | -0.114 | 0.705 |
| Tfpi    | -0.713 | -0.119 | 0.832 |
| Tgfa    | -0.750 | -0.123 | 0.873 |
| Tgfb1   | -0.800 | -0.102 | 0.902 |
| Tgfb1i1 | -0.582 | -0.145 | 0.728 |
| Tgfr1   | -0.775 | 0.035  | 0.740 |
| Tgfr2   | -0.664 | -0.333 | 0.997 |
| Tgfr3   | -0.613 | -0.264 | 0.877 |
| Tgm1    | -0.590 | -0.228 | 0.818 |
| Thap7   | -0.463 | -0.390 | 0.852 |
| Thbd    | -0.755 | -0.147 | 0.901 |
| Thoc1   | -0.542 | -0.201 | 0.742 |
| Thoc7   | -0.500 | -0.239 | 0.738 |
| Thyn1   | -0.593 | -0.151 | 0.744 |
| Timm23  | -0.567 | -0.226 | 0.793 |
| Timm50  | -0.677 | -0.174 | 0.851 |
| Timm9   | -0.794 | -0.038 | 0.832 |
| Timp2   | -0.587 | -0.191 | 0.778 |
| Tinag   | -0.816 | 0.120  | 0.696 |
| Tipin   | -0.497 | -0.377 | 0.874 |
| Tln1    | -0.674 | -0.197 | 0.870 |
| Tlr2    | -0.485 | -0.340 | 0.825 |
| Tlr3    | -0.622 | -0.334 | 0.956 |
| Tm2d2   | -0.508 | -0.259 | 0.766 |
| Tm4sf19 | -0.756 | -0.177 | 0.934 |
| Tm7sf3  | -0.646 | -0.190 | 0.836 |
| Tm9sf3  | -0.623 | -0.210 | 0.833 |
| Tm9sf4  | -0.598 | -0.106 | 0.704 |
| Tma16   | -0.585 | -0.393 | 0.979 |
| Tmbim4  | -0.591 | -0.268 | 0.859 |
| Tmc3    | -0.796 | 0.006  | 0.790 |
| Tmc7    | -0.990 | 0.179  | 0.812 |
| Tmed2   | -0.669 | -0.227 | 0.896 |
| Tmed3   | -0.680 | -0.343 | 1.022 |
| Tmed9   | -0.681 | -0.188 | 0.869 |
| Tmem104 | -0.562 | -0.202 | 0.764 |
| Tmem119 | -0.578 | -0.283 | 0.861 |

|           |        |        |       |
|-----------|--------|--------|-------|
| Tmem120a  | -0.652 | -0.360 | 1.012 |
| Tmem123   | -0.825 | -0.117 | 0.941 |
| Tmem128   | -0.696 | -0.169 | 0.865 |
| Tmem131   | -0.592 | -0.141 | 0.733 |
| Tmem138   | -0.783 | 0.068  | 0.715 |
| Tmem144   | -0.570 | -0.152 | 0.722 |
| Tmem147   | -0.474 | -0.384 | 0.858 |
| Tmem14c   | -0.630 | -0.182 | 0.812 |
| Tmem154   | -0.666 | -0.257 | 0.923 |
| Tmem165   | -0.570 | -0.154 | 0.725 |
| Tmem168   | -0.732 | -0.080 | 0.811 |
| Tmem170b  | -0.677 | 0.014  | 0.663 |
| Tmem173   | -0.713 | -0.060 | 0.772 |
| Tmem176a  | -0.591 | -0.200 | 0.791 |
| Tmem176b  | -0.622 | -0.173 | 0.794 |
| Tmem184b  | -0.627 | -0.181 | 0.808 |
| Tmem185a  | -0.554 | -0.353 | 0.907 |
| Tmem185b  | -0.808 | 0.017  | 0.791 |
| Tmem189   | -0.827 | -0.016 | 0.843 |
| Tmem192   | -0.723 | -0.205 | 0.927 |
| Tmem205   | -0.483 | -0.327 | 0.810 |
| Tmem208   | -0.662 | -0.040 | 0.702 |
| Tmem209   | -0.777 | -0.142 | 0.919 |
| Tmem230   | -0.515 | -0.339 | 0.854 |
| Tmem234   | -0.652 | -0.172 | 0.824 |
| Tmem263   | -0.748 | -0.113 | 0.861 |
| Tmem30a   | -0.740 | -0.148 | 0.888 |
| Tmem38b   | -0.644 | -0.043 | 0.687 |
| Tmem41b   | -0.685 | -0.198 | 0.883 |
| Tmem47    | -0.781 | -0.152 | 0.933 |
| Tmem5     | -0.713 | -0.112 | 0.826 |
| Tmem50a   | -0.679 | -0.201 | 0.879 |
| Tmem59    | -0.606 | -0.208 | 0.814 |
| Tmem60    | -0.565 | -0.295 | 0.860 |
| Tmem62    | -0.537 | -0.316 | 0.853 |
| Tmem65    | -0.630 | -0.140 | 0.771 |
| Tmem68    | -0.836 | -0.060 | 0.895 |
| Tmem69    | -0.830 | 0.038  | 0.792 |
| Tmem87b   | -0.623 | -0.048 | 0.671 |
| Tmem9b    | -0.596 | -0.179 | 0.775 |
| Tmod2     | -0.468 | -0.388 | 0.856 |
| Tmod3     | -0.673 | -0.172 | 0.845 |
| Tmsb10    | -0.612 | -0.139 | 0.751 |
| Tmsb4x    | -0.623 | -0.085 | 0.707 |
| Tmtc3     | -0.787 | -0.168 | 0.955 |
| Tmub1     | -0.596 | -0.127 | 0.723 |
| Tmx1      | -0.811 | -0.072 | 0.883 |
| Tmx3      | -0.743 | -0.127 | 0.870 |
| Tnfaip6   | -0.521 | -0.425 | 0.946 |
| Tnfaip8l2 | -0.728 | -0.105 | 0.834 |
| Tnfrsf18  | -0.641 | -0.201 | 0.842 |
| Tnfrsf1a  | -0.647 | -0.216 | 0.864 |
| Tnfrsf9   | -0.973 | 0.186  | 0.787 |
| Tnfsf13b  | -0.512 | -0.340 | 0.852 |
| Tnks2     | -0.531 | -0.197 | 0.729 |
| Tnn       | -0.613 | -0.103 | 0.716 |

|           |        |        |       |
|-----------|--------|--------|-------|
| Tnnc1     | -0.529 | -0.226 | 0.755 |
| Tnp01     | -0.728 | -0.104 | 0.832 |
| Tns1      | -0.538 | -0.229 | 0.766 |
| Tollip    | -0.615 | -0.140 | 0.754 |
| Tomm20    | -0.604 | -0.213 | 0.817 |
| Tomm70a   | -0.724 | -0.131 | 0.855 |
| Tor1aip1  | -0.562 | -0.201 | 0.763 |
| Tox       | -0.760 | 0.091  | 0.669 |
| Tox2      | -0.820 | 0.019  | 0.802 |
| Tpbg      | -0.578 | -0.209 | 0.787 |
| Tpbgl     | -0.597 | -0.411 | 1.009 |
| Tpd52     | -0.657 | -0.144 | 0.801 |
| Tpgs2     | -0.669 | -0.162 | 0.831 |
| Tpi1      | -0.710 | -0.230 | 0.940 |
| Tpp1      | -0.672 | -0.178 | 0.850 |
| Tpp2      | -0.654 | -0.190 | 0.844 |
| Tprkb     | -0.558 | -0.254 | 0.812 |
| Tpt1      | -0.740 | -0.166 | 0.905 |
| Trak2     | -0.683 | -0.143 | 0.825 |
| Trappc13  | -0.655 | -0.163 | 0.818 |
| Trappc2   | -0.757 | -0.197 | 0.955 |
| Trappc6b  | -0.678 | -0.053 | 0.731 |
| Trappc8   | -0.807 | -0.124 | 0.931 |
| Trbc1     | -0.869 | 0.078  | 0.791 |
| Triap1    | -0.497 | -0.322 | 0.819 |
| Trib2     | -0.654 | -0.100 | 0.754 |
| Trim16    | -0.677 | -0.134 | 0.811 |
| Trim23    | -0.620 | -0.142 | 0.762 |
| Trim30c   | -0.656 | -0.138 | 0.794 |
| Trim32    | -0.895 | 0.017  | 0.879 |
| Trip12    | -0.610 | -0.141 | 0.751 |
| Trmt10a   | -0.644 | -0.118 | 0.762 |
| Trmt10c   | -0.544 | -0.241 | 0.785 |
| Trmt112   | -0.542 | -0.173 | 0.715 |
| Trnt1     | -0.618 | -0.063 | 0.681 |
| Tro       | -0.766 | -0.164 | 0.930 |
| Trove2    | -0.637 | -0.129 | 0.766 |
| Trp53     | -0.640 | -0.044 | 0.684 |
| Trp53i11  | -0.716 | -0.147 | 0.864 |
| Trp53inp1 | -0.754 | -0.095 | 0.849 |
| Tsg101    | -0.578 | -0.140 | 0.718 |
| Tshz3     | -0.782 | -0.045 | 0.827 |
| Tsku      | -0.691 | -0.242 | 0.933 |
| Tspan2    | -0.688 | -0.269 | 0.957 |
| Tspan3    | -0.521 | -0.211 | 0.732 |
| Tspan31   | -0.551 | -0.220 | 0.771 |
| Tspan4    | -0.675 | -0.181 | 0.857 |
| Tspan8    | -0.675 | -0.318 | 0.993 |
| Tspan9    | -0.564 | -0.286 | 0.850 |
| Tsr1      | -0.629 | -0.074 | 0.702 |
| Tsta3     | -0.682 | -0.234 | 0.916 |
| Ttc17     | -0.677 | -0.090 | 0.767 |
| Ttc27     | -0.715 | -0.103 | 0.819 |
| Ttc33     | -0.630 | -0.176 | 0.806 |
| Ttc9c     | -0.602 | -0.179 | 0.782 |
| Ttpal     | -0.782 | -0.012 | 0.794 |

|           |        |        |       |
|-----------|--------|--------|-------|
| Ttyh2     | -0.587 | -0.159 | 0.747 |
| Tuba1c    | -0.688 | -0.283 | 0.971 |
| Tuba4a    | -0.688 | -0.205 | 0.892 |
| Tubb4a    | -0.672 | -0.278 | 0.949 |
| Tubb4b    | -0.595 | -0.380 | 0.975 |
| Tufm      | -0.574 | -0.217 | 0.791 |
| Tug1      | -0.660 | -0.098 | 0.758 |
| Tusc2     | -0.672 | -0.116 | 0.788 |
| Tusc3     | -0.494 | -0.314 | 0.808 |
| Twf1      | -0.709 | -0.280 | 0.989 |
| Txn1      | -0.490 | -0.357 | 0.847 |
| Txndc11   | -0.560 | -0.155 | 0.715 |
| Txndc12   | -0.600 | -0.192 | 0.792 |
| Txndc5    | -0.539 | -0.269 | 0.808 |
| Txn11     | -0.729 | -0.214 | 0.944 |
| Txnrd1    | -0.608 | -0.214 | 0.822 |
| Tyms      | -0.614 | -0.075 | 0.689 |
| Tyrobp    | -0.740 | -0.089 | 0.829 |
| U2af114_1 | -0.484 | -0.271 | 0.755 |
| Uba1      | -0.767 | -0.179 | 0.946 |
| Uba2      | -0.540 | -0.163 | 0.702 |
| Uba5      | -0.521 | -0.220 | 0.741 |
| Uba6      | -0.682 | -0.145 | 0.828 |
| Ubac2     | -0.588 | -0.194 | 0.782 |
| Ubald2    | -0.735 | -0.128 | 0.863 |
| Ubap2     | -0.543 | -0.170 | 0.712 |
| Ubap2l    | -0.618 | -0.147 | 0.766 |
| Ube2a     | -0.664 | -0.172 | 0.836 |
| Ube2b     | -0.546 | -0.207 | 0.753 |
| Ube2cbp   | -0.721 | -0.170 | 0.891 |
| Ube2d1    | -0.674 | 0.011  | 0.663 |
| Ube2d2a   | -0.631 | -0.063 | 0.694 |
| Ube2d3    | -0.765 | -0.172 | 0.937 |
| Ube2d-ps  | -0.612 | -0.191 | 0.803 |
| Ube2e1    | -0.624 | -0.284 | 0.908 |
| Ube2e3    | -0.653 | -0.149 | 0.802 |
| Ube2g1    | -0.672 | -0.094 | 0.765 |
| Ube2g2    | -0.600 | -0.103 | 0.703 |
| Ube2k     | -0.701 | -0.211 | 0.912 |
| Ube2n     | -0.778 | -0.028 | 0.805 |
| Ube2q2    | -0.601 | -0.122 | 0.722 |
| Ube2v1    | -0.647 | -0.323 | 0.970 |
| Ube2v2    | -0.687 | -0.213 | 0.900 |
| Ube2w     | -0.667 | 0.006  | 0.660 |
| Ube3a     | -0.543 | -0.187 | 0.730 |
| Ubiad1    | -0.572 | -0.138 | 0.710 |
| Ubl3      | -0.710 | -0.107 | 0.817 |
| Ubl4a     | -0.582 | -0.252 | 0.834 |
| Ubl7      | -0.798 | -0.084 | 0.882 |
| Ublcp1    | -0.535 | -0.244 | 0.779 |
| Ubr3      | -0.592 | -0.186 | 0.778 |
| Ubxn7     | -0.607 | -0.132 | 0.739 |
| Ubxn8     | -0.626 | -0.263 | 0.889 |
| Ucp2      | -0.832 | -0.085 | 0.918 |
| Uevld     | -0.733 | 0.019  | 0.714 |
| Ufl1      | -0.493 | -0.326 | 0.819 |

|           |        |        |       |
|-----------|--------|--------|-------|
| Ufsp2     | -0.612 | -0.345 | 0.958 |
| Ugdh      | -0.569 | -0.284 | 0.853 |
| Uhrf1bp1l | -0.602 | -0.243 | 0.845 |
| Ulbp1     | -0.491 | -0.364 | 0.854 |
| Umps      | -0.620 | -0.178 | 0.797 |
| Uprt      | -0.611 | -0.266 | 0.877 |
| Uqcrc1    | -0.534 | -0.219 | 0.753 |
| Uqcrfs1   | -0.513 | -0.320 | 0.833 |
| Uqcrq     | -0.594 | -0.249 | 0.843 |
| Usf2      | -0.704 | -0.136 | 0.839 |
| Usf3      | -0.546 | -0.157 | 0.703 |
| Usp1      | -0.558 | -0.161 | 0.719 |
| Usp10     | -0.619 | -0.166 | 0.785 |
| Usp14     | -0.722 | -0.201 | 0.923 |
| Usp38     | -0.694 | -0.057 | 0.751 |
| Usp9x     | -0.666 | -0.192 | 0.858 |
| Utp15     | -0.661 | -0.163 | 0.824 |
| Utp20     | -0.647 | -0.162 | 0.809 |
| Utp23     | -0.633 | -0.080 | 0.713 |
| Uxs1      | -0.589 | -0.159 | 0.748 |
| Vapa      | -0.623 | -0.209 | 0.832 |
| Vat1      | -0.550 | -0.233 | 0.783 |
| Vcl       | -0.566 | -0.202 | 0.768 |
| Vcpip1    | -0.644 | -0.078 | 0.722 |
| Vcpkmt    | -0.606 | -0.222 | 0.828 |
| Vdac2     | -0.663 | -0.188 | 0.851 |
| Vdr       | -0.593 | -0.103 | 0.696 |
| Vegfc     | -0.771 | -0.006 | 0.778 |
| Veze1     | -0.649 | -0.181 | 0.830 |
| Vim       | -0.644 | -0.261 | 0.905 |
| Vkorc1    | -0.683 | -0.025 | 0.708 |
| Vkorc1l1  | -0.610 | -0.174 | 0.784 |
| Vmp1      | -0.701 | -0.021 | 0.722 |
| Vopp1     | -0.602 | -0.157 | 0.759 |
| Vps26a    | -0.698 | -0.197 | 0.895 |
| Vps37a    | -0.616 | -0.122 | 0.738 |
| Vps4a     | -0.510 | -0.278 | 0.788 |
| Vps4b     | -0.643 | -0.062 | 0.705 |
| Vsir      | -0.811 | -0.143 | 0.954 |
| Vta1      | -0.613 | -0.275 | 0.888 |
| Vwa5a     | -0.713 | -0.131 | 0.845 |
| Vwa9      | -0.686 | -0.170 | 0.855 |
| Vwf       | -0.691 | -0.151 | 0.843 |
| Wac       | -0.649 | -0.114 | 0.763 |
| Wars      | -0.596 | -0.120 | 0.716 |
| Was       | -0.709 | -0.099 | 0.807 |
| Wasl      | -0.589 | -0.123 | 0.712 |
| Wbp2      | -0.526 | -0.224 | 0.750 |
| Wbscr17   | -0.587 | -0.121 | 0.708 |
| Wdr1      | -0.698 | -0.187 | 0.886 |
| Wdr12     | -0.858 | 0.085  | 0.773 |
| Wdr18     | -0.707 | -0.181 | 0.888 |
| Wdr36     | -0.797 | -0.102 | 0.899 |
| Wdr43     | -0.582 | -0.192 | 0.774 |
| Wdr82     | -0.601 | -0.098 | 0.699 |
| Wee1      | -0.535 | -0.207 | 0.743 |

|         |        |        |       |
|---------|--------|--------|-------|
| Wfdc1   | -0.693 | -0.339 | 1.032 |
| Wfdc8   | -0.776 | -0.183 | 0.959 |
| Wfs1    | -0.829 | -0.064 | 0.893 |
| Wipf3   | -0.795 | 0.019  | 0.776 |
| Wipi1   | -0.599 | -0.123 | 0.721 |
| Wisp1   | -0.712 | -0.138 | 0.849 |
| Wls     | -0.617 | -0.188 | 0.805 |
| Wnk1    | -0.646 | -0.188 | 0.834 |
| Wnk3    | -0.617 | -0.263 | 0.880 |
| Wtap    | -0.582 | -0.213 | 0.796 |
| Wwtr1   | -0.583 | -0.149 | 0.731 |
| Xbp1    | -0.667 | -0.056 | 0.722 |
| Xdh     | -0.612 | -0.079 | 0.691 |
| Xiap    | -0.615 | -0.124 | 0.739 |
| Xpnpep1 | -0.645 | -0.014 | 0.659 |
| Xpo1    | -0.598 | -0.121 | 0.719 |
| Xpo4    | -0.588 | -0.130 | 0.718 |
| Xpo7    | -0.621 | -0.151 | 0.773 |
| Yipf4   | -0.789 | -0.100 | 0.890 |
| Yme1l1  | -0.690 | -0.234 | 0.924 |
| Ythdf1  | -0.673 | -0.338 | 1.011 |
| Ythdf2  | -0.715 | -0.138 | 0.854 |
| Ythdf3  | -0.652 | -0.074 | 0.726 |
| Ywhab   | -0.559 | -0.154 | 0.714 |
| Ywhae   | -0.640 | -0.231 | 0.871 |
| Ywhah   | -0.695 | -0.230 | 0.925 |
| Ywhaz   | -0.756 | -0.194 | 0.950 |
| Zbtb2   | -0.742 | -0.155 | 0.897 |
| Zbtb20  | -0.589 | -0.142 | 0.732 |
| Zbtb38  | -0.691 | -0.039 | 0.731 |
| Zbtb41  | -0.651 | -0.129 | 0.780 |
| Zbtb6   | -0.605 | -0.263 | 0.867 |
| Zdhhc13 | -0.780 | -0.069 | 0.848 |
| Zdhhc17 | -0.753 | 0.012  | 0.741 |
| Zdhhc20 | -0.694 | -0.116 | 0.810 |
| Zdhhc21 | -0.656 | -0.051 | 0.706 |
| Zdhhc5  | -0.659 | -0.251 | 0.911 |
| Zdhhc9  | -0.565 | -0.199 | 0.764 |
| Zeb1    | -0.517 | -0.214 | 0.731 |
| Zfand2a | -0.673 | -0.052 | 0.725 |
| Zfand4  | -0.620 | -0.252 | 0.872 |
| Zfand5  | -0.602 | -0.179 | 0.781 |
| Zfas1   | -0.612 | -0.099 | 0.711 |
| Zfp108  | -0.681 | 0.042  | 0.640 |
| Zfp111  | -0.663 | -0.018 | 0.681 |
| Zfp119b | -0.719 | -0.152 | 0.870 |
| Zfp120  | -0.626 | -0.205 | 0.831 |
| Zfp275  | -0.560 | -0.220 | 0.779 |
| Zfp277  | -0.718 | -0.228 | 0.945 |
| Zfp281  | -0.791 | -0.151 | 0.942 |
| Zfp354c | -0.778 | -0.124 | 0.902 |
| Zfp36l1 | -0.744 | -0.199 | 0.943 |
| Zfp37   | -0.680 | -0.203 | 0.883 |
| Zfp40   | -0.850 | 0.058  | 0.792 |
| Zfp433  | -0.645 | -0.062 | 0.706 |
| Zfp442  | -0.814 | 0.094  | 0.720 |



|          |        |        |       |
|----------|--------|--------|-------|
| Zfp449   | -0.647 | -0.025 | 0.671 |
| Zfp503   | -0.492 | -0.347 | 0.839 |
| Zfp518a  | -0.525 | -0.187 | 0.713 |
| Zfp52    | -0.838 | 0.105  | 0.734 |
| Zfp58    | -0.652 | -0.241 | 0.893 |
| Zfp593   | -0.587 | -0.120 | 0.707 |
| Zfp65    | -0.665 | -0.071 | 0.736 |
| Zfp655   | -0.701 | -0.104 | 0.805 |
| Zfp706   | -0.581 | -0.170 | 0.750 |
| Zfp719   | -0.808 | 0.111  | 0.697 |
| Zfp729a  | -0.709 | -0.170 | 0.879 |
| Zfp729b  | -0.536 | -0.181 | 0.717 |
| Zfp758   | -0.737 | -0.252 | 0.989 |
| Zfp763   | -0.608 | -0.231 | 0.839 |
| Zfp791   | -0.530 | -0.303 | 0.833 |
| Zfp81    | -0.535 | -0.211 | 0.746 |
| Zfp820   | -0.582 | -0.322 | 0.904 |
| Zfp874a  | -0.772 | -0.098 | 0.870 |
| Zfp9     | -0.829 | 0.084  | 0.745 |
| Zfp930   | -0.707 | -0.141 | 0.848 |
| Zfp940   | -0.689 | -0.033 | 0.721 |
| Zfp942   | -0.833 | -0.092 | 0.925 |
| Zfp944   | -0.650 | -0.322 | 0.972 |
| Zfp945   | -0.607 | -0.115 | 0.723 |
| Zfp946   | -0.680 | -0.186 | 0.867 |
| Zfp948   | -0.806 | -0.070 | 0.875 |
| Zfp958   | -0.611 | -0.217 | 0.828 |
| Zfp994   | -0.721 | -0.222 | 0.944 |
| Zfr      | -0.565 | -0.181 | 0.746 |
| Zfyve21  | -0.749 | -0.214 | 0.963 |
| Zfyve9   | -0.557 | -0.211 | 0.768 |
| Zhx1     | -0.829 | -0.048 | 0.877 |
| Zhx3     | -0.855 | -0.070 | 0.925 |
| Zkscan1  | -0.541 | -0.220 | 0.761 |
| Zkscan14 | -0.614 | -0.134 | 0.748 |
| Zmpste24 | -0.745 | -0.211 | 0.956 |
| Zmynd19  | -0.594 | -0.108 | 0.702 |
| Zpr1     | -0.606 | -0.106 | 0.712 |
| Zscan22  | -0.646 | -0.203 | 0.849 |
| Zswim1   | -0.584 | -0.170 | 0.754 |
