# Supplementary material for: Transcriptomic Evaluation of Pulmonary Fibrosis-Related Genes: Utilization of Transgenic Mice with Modifying p38 Signal in the Lungs
Source: MDPI journal article supplement (doi:10.3390/ijms21186746), 2020-09-14
Supplement: s1 [file s1]

**Supplementary Table S3.** DEGs altered by BLM in WT group.

| Name (symbol) | Fold change | FDR p-value correction | WT_PBS_Rep1 - RPKM | WT_PBS_Rep2 - RPKM | WT_PBS_Rep3 - RPKM | WT_BLM_Rep1 - RPKM | WT_BLM_Rep2 - RPKM | WT_BLM_Rep3 - RPKM |
|---------------|-------------|------------------------|--------------------|--------------------|--------------------|--------------------|--------------------|--------------------|
| Srp54a        | 240.446     | 0.00227                | 0                  | 0                  | 0                  | 7.0086             | 3.34187            | 0                  |
| Ighv8-12      | 190.667     | 0.00209                | 0                  | 0                  | 0                  | 8.73527            | 9.20892            | 1.23772            |
| Bcl2a1b       | 168.924     | 1.1E-06                | 0                  | 0                  | 0                  | 10.6819            | 7.06168            | 1.844              |
| Serpib9b      | 166.107     | 1E-06                  | 0                  | 0                  | 0                  | 0.69306            | 0.81439            | 0.13621            |
| Celf5         | 156.579     | 3.3E-07                | 0                  | 0                  | 0                  | 0.19632            | 0.30018            | 0.31897            |
| Tfpi2         | 152.853     | 5.4E-07                | 0                  | 0                  | 0                  | 1.24888            | 1.21315            | 0.30436            |
| Flrt3         | 146.185     | 9.9E-06                | 0.04761            | 0.09559            | 0.17947            | 2.92998            | 3.23097            | 0.63756            |
| Fcgr4         | 140.201     | 5.8E-06                | 0                  | 0                  | 0                  | 2.25822            | 1.12493            | 0.28223            |
| Clec4e        | 139.723     | 2E-05                  | 0                  | 0                  | 0                  | 0.36619            | 0.36758            | 0.16064            |
| Ms4a1         | 136.286     | 0.00014                | 0.03744            | 0.0451             | 0.01283            | 1.11669            | 1.41778            | 0.22918            |
| Igkv5-43      | 132.266     | 0.00382                | 0                  | 0                  | 0.20943            | 4.22158            | 9.32               | 0.70148            |
| Trbc1         | 126.359     | 2.2E-05                | 0                  | 0.12418            | 0                  | 3.39842            | 3.6942             | 0.47327            |
| Tlr6          | 110.488     | 6E-05                  | 0                  | 0                  | 0                  | 0.46832            | 0.44229            | 0.09511            |
| Gpr176        | 105.837     | 6.5E-05                | 0                  | 0.02385            | 0                  | 1.41759            | 1.08713            | 0.22729            |
| Ighv1-80      | 102.058     | 0.00328                | 0                  | 0                  | 0                  | 0.62159            | 8.55395            | 0.75744            |
| Rgs16         | 101.743     | 7.6E-05                | 0.09903            | 0.11929            | 0.06787            | 1.86557            | 3.75025            | 1.40186            |
| Gm6377        | 100.589     | 7.6E-05                | 0                  | 0                  | 0                  | 0.54642            | 0.42126            | 0.19024            |
| Mmp12         | 98.3318     | 4.1E-15                | 0.04801            | 0                  | 0                  | 3.73831            | 5.45843            | 0.95515            |
| Mmp13         | 92.3228     | 0.00059                | 0                  | 0                  | 0                  | 0.43532            | 0.59466            | 0.06631            |
| Ighv1-47      | 90.4888     | 0.01496                | 0                  | 0                  | 0                  | 6.77801            | 0.74145            | 0.44645            |
| C430002N11Rik | 86.9772     | 0.00217                | 0                  | 0                  | 0                  | 0.41341            | 0.66931            | 0.2099             |
| Gjb4          | 86.9211     | 0.00125                | 0                  | 0                  | 0                  | 0.75442            | 0.9364             | 0.18386            |
| Cemip         | 86.7579     | 2.4E-19                | 0.00947            | 0.0076             | 0.00649            | 2.30688            | 2.26687            | 0.38398            |
| Tarm1         | 86.6995     | 0.00069                | 0                  | 0                  | 0                  | 0.56322            | 0.45593            | 0.30026            |
| Spp1          | 86.3002     | 2E-48                  | 0.28111            | 0.84656            | 0.81877            | 184.419            | 177.9              | 33.3403            |
| Igkv6-15      | 81.1694     | 0.0167                 | 0                  | 0                  | 0                  | 0.83834            | 6.27735            | 0.51078            |
| Sirpb1b       | 74.2333     | 0.00198                | 0                  | 0                  | 0.02759            | 0.58141            | 0.53203            | 0.43124            |
| Ano5          | 71.4373     | 0.00235                | 0                  | 0                  | 0                  | 0.0837             | 0.15057            | 0.04533            |
| Ighv1-64      | 71.2451     | 0.02034                | 0                  | 0                  | 0                  | 3.41185            | 3.19795            | 0.21882            |
| Depdc1a       | 70.4853     | 0.00227                | 0.03485            | 0                  | 0                  | 0.52526            | 0.30118            | 0.18668            |
| Hist1h2bn     | 69.8179     | 0.00217                | 1.21595            | 0                  | 0.62498            | 8.58971            | 10.8163            | 3.489              |
| Klrb1b        | 67.8962     | 0.00661                | 0.15595            | 0.25047            | 0.24938            | 1.99116            | 1.50613            | 0.75574            |
| Igkv14-111    | 66.5494     | 0.01294                | 0                  | 0                  | 0                  | 1.97626            | 3.03955            | 0.72245            |
| Clec4n        | 64.6518     | 2.2E-16                | 0                  | 0                  | 0.11179            | 9.4749             | 9.3282             | 1.99708            |
| Igkv6-32      | 63.8972     | 0.04308                | 0                  | 0                  | 0                  | 1.78835            | 3.37786            | 0.48427            |
| Gm26682       | 63.4825     | 0.00508                | 0                  | 0                  | 0                  | 0.3365             | 0.44264            | 0.35879            |
| Ankrd34b      | 63.2261     | 0.02586                | 0                  | 0                  | 0                  | 0.07659            | 0.30998            | 0.05599            |
| Olfr164       | 62.3982     | 0.01055                | 0                  | 0                  | 0                  | 0.37839            | 0.24504            | 0.06148            |
| Mir155hg      | 62.3258     | 0.00414                | 0                  | 0                  | 0                  | 0.50751            | 0.53407            | 0.30921            |
| 4930554G24Rik | 61.4312     | 0.00508                | 0                  | 0                  | 0                  | 0.36295            | 0.44071            | 0.38699            |
| Ighv1-53      | 60.3859     | 0.00956                | 0                  | 0                  | 0                  | 2.69356            | 2.51587            | 1.2624             |
| Mmp10         | 58.7998     | 0.00951                | 0                  | 0                  | 0                  | 0.5068             | 0.44444            | 0.10293            |
| Olfr111       | 57.2202     | 0.01883                | 0                  | 0                  | 0                  | 0.22013            | 0.42321            | 0.10059            |
| Ccl2          | 57.1894     | 0.02292                | 0                  | 0.08173            | 0                  | 2.10893            | 1.81063            | 0.38937            |
| Izumo1r       | 54.5845     | 0.02064                | 0                  | 0                  | 0                  | 0.28213            | 0.35526            | 0.0764             |
| Fam167b       | 54.1818     | 0.01371                | 0                  | 0                  | 0                  | 0.45501            | 0.73666            | 0.55446            |
| Gm10561       | 53.4301     | 0.01845                | 0                  | 0                  | 0                  | 0.33687            | 0.39389            | 0.18244            |
| Ighg2c        | 52.9584     | 2.7E-05                | 0.17469            | 0.07014            | 0.05986            | 16.8927            | 23.1312            | 2.27232            |
| Fpr1          | 52.5255     | 0.02162                | 0                  | 0                  | 0                  | 0.60422            | 0.57804            | 0.06693            |
| Gm10797       | 51.1321     | 0.02154                | 0                  | 0                  | 0                  | 0.19638            | 0.34443            | 0.15953            |

|           |         |         |         |         |         |         |         |         |
|-----------|---------|---------|---------|---------|---------|---------|---------|---------|
| Gdf3      | 50.1786 | 0.03787 | 0       | 0       | 0       | 0.27013 | 0.29156 | 0.07315 |
| Svop      | 48.6404 | 0.04391 | 0       | 0       | 0       | 0.15963 | 0.12922 | 0.0389  |
| Zeb2os    | 48.398  | 0.02154 | 0       | 0.13402 | 0.11437 | 1.30991 | 1.23002 | 1.08541 |
| Dspp      | 47.536  | 0.02984 | 0       | 0       | 0       | 0.1313  | 0.10629 | 0.1     |
| Ccr8      | 47.0662 | 0.02808 | 0       | 0       | 0       | 0.43326 | 0.50103 | 0.30169 |
| Gm15922   | 46.4632 | 0.0424  | 0.03345 | 0       | 0       | 0.56719 | 0.54416 | 0.33278 |
| Pcdhgb6   | 46.372  | 0.04751 | 0       | 0       | 0       | 0.13974 | 0.12569 | 0.03784 |
| Ano3      | 45.2717 | 0.01709 | 0       | 0       | 0       | 0.0403  | 0.08972 | 0.06139 |
| Ighv10-3  | 45.1723 | 0.01993 | 0       | 0       | 0       | 1.92908 | 1.40542 | 0.94027 |
| Gm20707   | 44.609  | 0.02521 | 0       | 0.1109  | 0.12619 | 1.0406  | 1.28693 | 0.52834 |
| Mmp8      | 41.7948 | 7.6E-08 | 0       | 0       | 0.03273 | 2.39922 | 1.6751  | 0.21927 |
| Gm13749   | 41.3004 | 0.02681 | 0       | 0       | 0       | 0.30472 | 0.28778 | 0.30943 |
| Tm4sf19   | 40.6864 | 0.04923 | 0       | 0       | 0       | 0.57857 | 0.23417 | 0.2115  |
| Tnfsf9    | 40.2234 | 0.03388 | 0.18832 | 0.22685 | 0.12906 | 1.06429 | 0.67008 | 0.4323  |
| Hoxa5     | 39.7012 | 0.04589 | 0.30852 | 0.94148 | 1.09947 | 4.14582 | 4.64196 | 2.73841 |
| Gm10521   | 34.7905 | 2.2E-09 | 0       | 0.03613 | 0       | 1.38445 | 1.32655 | 0.44758 |
| Cxcl10    | 30.9709 | 4.2E-07 | 0.14405 | 0.11568 | 0.04936 | 4.61323 | 3.00215 | 1.26758 |
| Sprr1a    | 30.4095 | 1.1E-05 | 0       | 0.1154  | 0       | 5.14317 | 3.3599  | 0.76966 |
| Ighv1-81  | 28.6761 | 1.4E-05 | 0.65994 | 0.52996 | 0.22613 | 60.2944 | 27.5068 | 13.129  |
| A2m       | 27.99   | 9.9E-06 | 0       | 0       | 0.01612 | 0.85647 | 0.50205 | 0.05398 |
| Il1rn     | 25.9207 | 4.2E-11 | 0.03715 | 0.02983 | 0.02546 | 2.49574 | 2.34126 | 0.68213 |
| Atg9b     | 25.9026 | 2.7E-11 | 0       | 0.02357 | 0.02011 | 0.77408 | 1.05927 | 0.94325 |
| Cthrc1    | 25.4107 | 1.6E-06 | 0       | 0       | 0.05363 | 2.11299 | 1.47178 | 0.47903 |
| Igkv1-117 | 24.5911 | 1.2E-05 | 0.57336 | 0.23022 | 0.19647 | 24.6621 | 25.2098 | 6.36138 |
| Timp1     | 24.5591 | 3.5E-10 | 0.13043 | 0.5237  | 0.98322 | 37.6735 | 26.2534 | 4.9899  |
| Ighv1-26  | 24.4951 | 0.00906 | 0       | 0.26498 | 0.6784  | 23.8277 | 14.0889 | 0.25248 |
| Atp6v0d2  | 24.1946 | 4.8E-16 | 0       | 0.03424 | 0.17535 | 6.29259 | 5.05045 | 1.72934 |
| Fn1       | 23.8278 | 1.6E-26 | 1.44712 | 2.45158 | 2.67633 | 208.196 | 150.803 | 26.6355 |
| Sh2d1b1   | 23.4182 | 3.4E-07 | 0.04553 | 0.07312 | 0       | 1.74383 | 2.08271 | 0.45286 |
| Ighv5-9   | 22.2201 | 0.00701 | 0       | 0.22251 | 0       | 7.65539 | 6.05614 | 0       |
| Igkv12-46 | 21.4509 | 0.02432 | 0       | 0.49341 | 0       | 10.6099 | 6.87092 | 0       |
| Dcstamp   | 20.9814 | 1.8E-06 | 0       | 0.09334 | 0       | 2.18945 | 1.15202 | 1.15611 |
| Igkv1-110 | 19.3575 | 0.00032 | 0       | 1.85553 | 0.19794 | 83.0639 | 13.5066 | 4.86198 |
| Shcbp1    | 18.9567 | 2.1E-05 | 0       | 0       | 0.01261 | 0.3697  | 0.17769 | 0.15486 |
| Ighv1-19  | 18.9398 | 0.00225 | 0       | 0       | 0.19598 | 5.02799 | 5.81445 | 0.87526 |
| Ackr1     | 18.7463 | 3.3E-05 | 0       | 0       | 0.05649 | 0.93172 | 1.50845 | 0.63075 |
| Thbs4     | 18.2603 | 2E-08   | 0.03521 | 0.02828 | 0.0724  | 3.80326 | 2.09424 | 0.40417 |
| Frzb      | 18.2266 | 5.5E-05 | 0       | 0.02873 | 0       | 0.51674 | 0.58198 | 0.19164 |
| Fst       | 18.181  | 2.6E-14 | 0.14868 | 0.19899 | 0.06793 | 7.31308 | 7.255   | 2.42692 |
| Cxcl13    | 18.0738 | 8.2E-08 | 0       | 0.08088 | 0.20706 | 7.65206 | 5.4264  | 0.84767 |
| Msr1      | 17.9226 | 2.1E-15 | 0.03651 | 0.02932 | 0.06256 | 2.22397 | 2.50556 | 0.71243 |
| Gm26703   | 17.852  | 0.00019 | 0       | 0.10163 | 0.07228 | 0.51654 | 0.78266 | 0.29051 |
| Gpnmb     | 17.8391 | 4.6E-17 | 0.11916 | 0.22965 | 0.21231 | 11.0137 | 9.61807 | 3.04519 |
| Pilra     | 17.5322 | 1.4E-08 | 0       | 0       | 0.07706 | 1.64752 | 2.28627 | 0.48756 |
| Tnfsf8    | 17.43   | 1.3E-06 | 0       | 0.02443 | 0.02085 | 0.99337 | 0.89691 | 0.16295 |
| Phex      | 17.4232 | 4.4E-11 | 0       | 0.01478 | 0.05047 | 0.98263 | 1.39435 | 0.47895 |
| Ereg      | 17.2394 | 1.2E-05 | 0.02806 | 0       | 0.01923 | 0.73995 | 0.95552 | 0.19321 |
| Chl1      | 16.8075 | 9.9E-28 | 0.01884 | 0.05296 | 0.05811 | 2.34276 | 2.03054 | 0.76416 |
| Ighg2b    | 16.7679 | 1.1E-05 | 0.12975 | 0.17365 | 0.02964 | 6.05599 | 6.81483 | 1.02585 |
| Ighv9-3   | 16.7313 | 0.01122 | 0       | 0       | 0.22613 | 2.27917 | 8.38623 | 1.00992 |
| Ccr1      | 16.6707 | 1E-08   | 0.04088 | 0.09849 | 0.05603 | 3.69664 | 3.5327  | 0.62563 |
| Chodl     | 16.4126 | 0.0012  | 0.03032 | 0       | 0       | 0.38077 | 0.29282 | 0.32479 |
| Gm10718   | 16.286  | 0.00623 | 0       | 0.95604 | 0.46621 | 2.13587 | 4.06307 | 8.58878 |
| Adamts4   | 16.276  | 4.7E-11 | 0.04816 | 0.07735 | 0.0165  | 1.95045 | 1.48096 | 0.73697 |
| Wfdc17    | 16.0206 | 7.7E-06 | 0       | 0.1745  | 0.29783 | 10.37   | 8.39441 | 1.33014 |
| Saa3      | 15.9735 | 0.00014 | 0.17777 | 0.03569 | 0.12183 | 9.37683 | 3.75005 | 1.12221 |

|               |         |         |         |         |         |         |         |         |
|---------------|---------|---------|---------|---------|---------|---------|---------|---------|
| C3ar1         | 15.6793 | 2.7E-13 | 0.10761 | 0.10802 | 0.11062 | 5.45658 | 5.62047 | 1.17337 |
| Sirpb1c       | 15.53   | 3.2E-06 | 0       | 0.03267 | 0.05576 | 1.9925  | 1.94377 | 0.40466 |
| Clec7a        | 15.5124 | 2.7E-17 | 0.30733 | 0.17629 | 0.33097 | 11.441  | 14.4166 | 4.03126 |
| Pla1a         | 15.3929 | 1.1E-08 | 0       | 0.09433 | 0.04025 | 2.54468 | 1.6121  | 0.85385 |
| Chrna7        | 15.353  | 3.4E-09 | 0       | 0.04129 | 0.01762 | 1.06547 | 0.81022 | 0.31475 |
| Lama1         | 15.3156 | 3E-19   | 0.08518 | 0.08795 | 0.07505 | 2.10125 | 3.06171 | 2.72808 |
| Gdf6          | 15.1452 | 0.00089 | 0       | 0.02633 | 0       | 0.4324  | 0.38336 | 0.17564 |
| Ccl9          | 15.0773 | 4.8E-19 | 0.07607 | 0.2749  | 0.3128  | 10.891  | 10.4209 | 2.70664 |
| Ccl6          | 15.0581 | 5E-09   | 1.29046 | 1.45083 | 0.9286  | 45.0133 | 32.9286 | 9.23234 |
| Cd53          | 15.051  | 1.5E-12 | 0.13297 | 0.32035 | 0.50121 | 17.7849 | 14.4306 | 3.0015  |
| Igkv10-96     | 14.7635 | 0.01736 | 0.32262 | 0       | 0.22109 | 6.48256 | 17.3826 | 0.24685 |
| Ch25h         | 14.7247 | 4.8E-07 | 0.08579 | 0.20669 | 0.05879 | 5.17164 | 5.1894  | 1.18161 |
| Syt13         | 14.4852 | 0.00036 | 0       | 0       | 0.0211  | 0.23204 | 0.42263 | 0.21207 |
| Megf10        | 14.3789 | 7.8E-07 | 0       | 0.01205 | 0.01028 | 0.3298  | 0.32037 | 0.14927 |
| Frmpd3        | 14.1909 | 0.00282 | 0       | 0.00907 | 0       | 0.05673 | 0.18369 | 0.06913 |
| Tfec          | 13.7505 | 2.3E-06 | 0.0207  | 0.03325 | 0.01419 | 1.14407 | 0.77878 | 0.25347 |
| Ms4a6d        | 13.5387 | 1.9E-06 | 0.06675 | 0.05361 | 0.13724 | 4.9043  | 3.46102 | 0.4597  |
| Trac          | 13.472  | 0.00029 | 0.37161 | 0       | 0       | 4.58914 | 4.7223  | 1.04259 |
| Selp          | 13.4249 | 3E-09   | 0.05249 | 0.02108 | 0.03597 | 1.648   | 1.37406 | 0.52212 |
| Cers3         | 13.4185 | 0.00144 | 0       | 0       | 0.02438 | 0.42439 | 0.36162 | 0.16331 |
| Cysltr1       | 13.1658 | 3.2E-09 | 0       | 0       | 0.06174 | 1.00419 | 0.98462 | 0.32746 |
| Hist1h2bb     | 13.0861 | 7.6E-06 | 0.51247 | 0       | 0.87802 | 17.538  | 11.5919 | 2.94095 |
| Emilin2       | 12.5727 | 3E-05   | 0.23697 | 0.45196 | 0.5075  | 3.58981 | 3.35762 | 1.67722 |
| Wnt10a        | 12.5304 | 0.00207 | 0       | 0.03769 | 0       | 0.50095 | 0.47708 | 0.17954 |
| Clec5a        | 12.4657 | 1.1E-09 | 0.03016 | 0.04844 | 0.04134 | 1.09847 | 1.54844 | 0.69235 |
| A630033H20Rik | 12.4506 | 0.01061 | 0       | 0       | 0.02291 | 0.25187 | 0.54369 | 0.05115 |
| Igkv8-30      | 12.4289 | 0.0014  | 0       | 0.50548 | 0.43137 | 11.6599 | 8.7987  | 2.16735 |
| Hist1h2bh     | 12.2817 | 0.00483 | 0       | 0.23971 | 0       | 6.93523 | 4.70364 | 0.91361 |
| Tmem37        | 12.2085 | 3E-08   | 0       | 0.21283 | 0.18163 | 6.71234 | 4.53547 | 0.87877 |
| Mest          | 12.1942 | 2.9E-12 | 0.02936 | 0.09431 | 0.14084 | 2.50717 | 2.55184 | 1.32538 |
| Olr1          | 12.0981 | 5.3E-09 | 0.06485 | 0.07811 | 0.02222 | 1.28269 | 2.04369 | 0.89315 |
| Sfrp1         | 12.0261 | 1.1E-24 | 0.26491 | 0.91477 | 0.41756 | 19.4291 | 19.9155 | 5.22967 |
| Ighg1         | 12.0122 | 0.01975 | 0.04468 | 0.07177 | 0       | 0.89785 | 2.45297 | 0.06838 |
| Tnc           | 11.992  | 9.3E-20 | 0.62589 | 1.28048 | 0.87829 | 32.9851 | 23.6334 | 7.76513 |
| Trem2         | 11.8739 | 1.4E-23 | 0.07025 | 0.13163 | 0.08024 | 3.10255 | 2.89238 | 1.41549 |
| Ctse          | 11.8587 | 0.01181 | 0       | 0       | 0.02504 | 0.34413 | 0.46428 | 0.05591 |
| Clca3a1       | 11.8015 | 6.8E-15 | 0.05941 | 0.14313 | 0.1425  | 3.15228 | 4.59012 | 1.77287 |
| Ephb1         | 11.692  | 0.00357 | 0.01654 | 0.01328 | 0.01134 | 0.21812 | 0.27746 | 0.12656 |
| Cd200r4       | 11.6273 | 0.00147 | 0.05664 | 0       | 0.03881 | 1.2447  | 1.00758 | 0.30335 |
| Slfn1         | 11.5486 | 4.6E-09 | 0.06213 | 0.14969 | 0.08516 | 4.01867 | 2.81092 | 1.09349 |
| Ear2          | 11.4279 | 4E-05   | 0.48325 | 0.12936 | 0.22079 | 12.0367 | 12.7732 | 1.72557 |
| Fam180a       | 11.4087 | 0.00851 | 0       | 0.05791 | 0       | 0.99625 | 0.5132  | 0.16554 |
| Cd68          | 11.2752 | 8.7E-10 | 0.09214 | 0.51795 | 0.5683  | 20.1921 | 10.2568 | 2.32655 |
| Iglc2         | 11.1793 | 0.00397 | 0.18925 | 0.30395 | 0       | 4.15918 | 8.46516 | 0.43441 |
| Ccr5          | 11.1758 | 1.7E-14 | 0.09613 | 0.11028 | 0.24469 | 4.18215 | 5.2631  | 1.13481 |
| Cybb          | 11.1348 | 1.2E-16 | 0.19941 | 0.56049 | 0.27332 | 12.3214 | 12.0317 | 2.8228  |
| Tnfsf18       | 11.0591 | 0.00078 | 0       | 0       | 0.07684 | 0.80963 | 1.25379 | 0.25737 |
| Prss22        | 10.9309 | 0.0028  | 0       | 0.0703  | 0       | 0.71462 | 0.53398 | 0.66985 |
| Tnfrsf11b     | 10.8342 | 1.9E-06 | 0.0411  | 0.03301 | 0.05633 | 1.13554 | 1.58773 | 0.50317 |
| Plau          | 10.6427 | 1.4E-12 | 0       | 0.15879 | 0.30489 | 2.91774 | 5.05042 | 1.929   |
| Hist1h2bk     | 10.337  | 0.00169 | 0.72995 | 0.78159 | 0.50025 | 10.695  | 11.9969 | 1.30324 |
| Fgf23         | 10.2358 | 0.01622 | 0       | 0       | 0.04376 | 0.52119 | 0.64908 | 0.09771 |
| Arg1          | 10.2209 | 0.0002  | 0.31387 | 0.06301 | 0.10755 | 4.18816 | 5.94297 | 1.44098 |
| Fcgr2b        | 10.2011 | 5.5E-26 | 0.24004 | 0.40159 | 0.4798  | 11.7191 | 11.6421 | 3.64278 |
| Ticam2        | 10.0942 | 0.00058 | 0       | 0.07104 | 0       | 0.75911 | 0.92923 | 0.47379 |
| Fam162b       | 10.0404 | 0.00969 | 0       | 0       | 0.13119 | 1.68292 | 0.97308 | 1.17184 |

|               |         |         |         |         |         |         |         |         |
|---------------|---------|---------|---------|---------|---------|---------|---------|---------|
| H2-Eb2        | 9.98554 | 6.2E-05 | 0.05243 | 0.0421  | 0.07186 | 1.54737 | 1.65234 | 0.64189 |
| Gm14548       | 9.93778 | 0.02314 | 0.10885 | 0.13112 | 0       | 0.88857 | 0.38731 | 0.41645 |
| Tlr1          | 9.91766 | 1.1E-07 | 0.03461 | 0.08339 | 0.11861 | 2.02138 | 3.02626 | 0.82105 |
| Ctss          | 9.81921 | 2.6E-19 | 5.03191 | 5.54764 | 4.67587 | 176.567 | 157.062 | 47.2469 |
| Lox           | 9.7991  | 1.3E-14 | 0.28895 | 1.12152 | 1.28713 | 30.1489 | 25.2988 | 5.56412 |
| Clec4a2       | 9.75909 | 6.8E-06 | 0.11875 | 0.03179 | 0.02713 | 1.6653  | 1.69009 | 0.39373 |
| Lilrb4a       | 9.71934 | 8.9E-12 | 0.47502 | 0.27743 | 0.35514 | 11.2262 | 10.6899 | 3.83295 |
| Rdh12         | 9.71538 | 0.04487 | 0       | 0.03135 | 0       | 0.29414 | 0.33731 | 0.11947 |
| Ddias         | 9.65983 | 0.00023 | 0.03129 | 0       | 0.04288 | 0.7858  | 0.71562 | 0.19151 |
| Clec4a1       | 9.64593 | 0.0002  | 0.07434 | 0.0597  | 0.10189 | 2.33396 | 2.87177 | 0.2844  |
| Trem1         | 9.62663 | 0.00155 | 0       | 0.03104 | 0.02649 | 0.77678 | 0.49125 | 0.1479  |
| Tdo2          | 9.61753 | 0.01438 | 0       | 0       | 0.02045 | 0.24361 | 0.22754 | 0.09134 |
| Kynu          | 9.5854  | 3.1E-07 | 0.01884 | 0.04538 | 0.01291 | 0.55588 | 0.67019 | 0.37472 |
| Fcer1g        | 9.50448 | 2.4E-09 | 0.92761 | 0.53209 | 0.63571 | 24.7968 | 20.4096 | 3.54888 |
| Gm16638       | 9.47265 | 0.03903 | 0.03738 | 0.06003 | 0.01708 | 0.34423 | 0.18999 | 0.27646 |
| Itm2a         | 9.44743 | 2.3E-07 | 0.13282 | 0.15999 | 0.13654 | 3.21096 | 4.45586 | 1.47362 |
| Olfr99        | 9.27373 | 0.02073 | 0       | 0       | 0.04464 | 0.57265 | 0.46355 | 0.14953 |
| Nr5a2         | 9.2472  | 0.00124 | 0       | 0.03153 | 0       | 0.09863 | 0.36926 | 0.18028 |
| Wisp1         | 9.23316 | 5.4E-09 | 0.14693 | 0.10113 | 0.10069 | 3.2027  | 3.97952 | 0.62635 |
| RP23-181A8.7  | 9.19267 | 0.00377 | 0.03937 | 0       | 0.02698 | 0.59328 | 0.52028 | 0.24098 |
| Stra6l        | 9.16262 | 0.00071 | 0       | 0.01944 | 0.0083  | 0.25846 | 0.28306 | 0.07411 |
| Susd3         | 9.11501 | 0.00072 | 0.04082 | 0.06557 | 0       | 0.61524 | 1.18282 | 0.2499  |
| Sgol2a        | 8.88151 | 0.00576 | 0.0469  | 0.07533 | 0.03214 | 0.75097 | 0.88206 | 0.41269 |
| Has2          | 8.80555 | 1.4E-06 | 0       | 0.08781 | 0.01873 | 0.75524 | 1.18104 | 0.35557 |
| Gpr141        | 8.75873 | 0.00054 | 0.03374 | 0.05419 | 0       | 0.74146 | 0.68595 | 0.20651 |
| Pou2af1       | 8.71084 | 5.1E-10 | 0.09087 | 0.25542 | 0.12456 | 4.96444 | 3.3489  | 1.18207 |
| Ccr6          | 8.70237 | 0.02061 | 0.17133 | 0       | 0       | 1.18341 | 1.48049 | 0.43699 |
| Pif1          | 8.61827 | 0.00614 | 0.02639 | 0       | 0.01809 | 0.28176 | 0.37566 | 0.18177 |
| Gdf15         | 8.57064 | 5.3E-07 | 0       | 0.15066 | 0.12857 | 2.55249 | 2.03443 | 1.10058 |
| Dusp19        | 8.56377 | 0.02872 | 0.19355 | 0.24869 | 0.31834 | 1.4098  | 0.72802 | 0.50353 |
| Eda2r         | 8.42777 | 1.8E-10 | 0.01966 | 0.06315 | 0.09432 | 1.40737 | 1.71887 | 0.43626 |
| Hist1h2ag     | 8.41351 | 0.00618 | 0.4776  | 0.19177 | 0.49097 | 9.14701 | 8.98243 | 1.09634 |
| Shc4          | 8.36245 | 0.00037 | 0.04205 | 0.02251 | 0.00961 | 0.39606 | 0.62697 | 0.15015 |
| Nuf2          | 8.21482 | 9E-05   | 0.01827 | 0.02934 | 0.01252 | 0.4473  | 0.43636 | 0.20964 |
| Mis18bp1      | 8.16594 | 2.9E-06 | 0       | 0.01164 | 0.03974 | 0.49152 | 0.42735 | 0.14419 |
| Mgp           | 8.14413 | 8.5E-09 | 7.31798 | 17.16   | 12.5713 | 442.117 | 266.731 | 40.9879 |
| Bmper         | 8.12732 | 1.1E-12 | 0.21568 | 0.07698 | 0.18065 | 4.01777 | 3.08182 | 1.63195 |
| Serpina3n     | 8.12265 | 1.5E-12 | 1.6273  | 2.97411 | 3.73022 | 100.104 | 53.0241 | 13.6967 |
| Tlr8          | 8.07745 | 5.8E-07 | 0.0323  | 0.07781 | 0.15494 | 2.73788 | 2.18346 | 0.39541 |
| Col24a1       | 8.02959 | 1.3E-06 | 0.0152  | 0.03661 | 0.04166 | 0.50577 | 0.64889 | 0.50002 |
| Ildr2         | 8.02573 | 4.8E-12 | 0.08422 | 0.2029  | 0.13468 | 2.25644 | 3.34634 | 1.00961 |
| Ccr2          | 8.01238 | 2.3E-15 | 0.27413 | 0.37148 | 0.58708 | 7.12201 | 12.2184 | 3.17251 |
| Ighv3-6       | 8.00599 | 0.01549 | 0       | 0.53148 | 0.22678 | 9.97388 | 4.87791 | 0.7596  |
| E230029C05Rik | 7.96529 | 0.0002  | 0.10339 | 0.02076 | 0.01771 | 1.02248 | 0.6569  | 0.33621 |
| Col12a1       | 7.93775 | 9.4E-14 | 0.07606 | 0.42754 | 0.31274 | 7.48371 | 5.84538 | 1.43744 |
| Ifi206        | 7.93367 | 0.0001  | 0.03792 | 0.09136 | 0.10396 | 2.00033 | 1.85057 | 0.46429 |
| Apoe          | 7.93123 | 8.3E-11 | 3.4711  | 11.3822 | 10.3478 | 280.152 | 149.59  | 37.6261 |
| 5430427O19Rik | 7.84648 | 1.2E-05 | 0       | 0.02478 | 0.06343 | 0.79429 | 0.65866 | 0.28328 |
| Lhfp12        | 7.84083 | 1.3E-12 | 0.05598 | 0.10115 | 0.14386 | 2.1969  | 2.58931 | 0.74957 |
| Chst5         | 7.78198 | 0.02036 | 0.10616 | 0       | 0       | 0.43329 | 0.78243 | 0.32491 |
| Lipa          | 7.77861 | 5.6E-10 | 0.39009 | 0.75184 | 0.72182 | 14.3297 | 15.4664 | 4.38775 |
| Cd52          | 7.71405 | 5E-06   | 0.68301 | 0.47014 | 0.53495 | 16.7877 | 11.9032 | 2.09046 |
| Asxl3         | 7.71334 | 0.04361 | 0.00746 | 0.00599 | 0       | 0.07023 | 0.12507 | 0.02282 |
| Abcg3         | 7.696   | 0.00106 | 0       | 0.0524  | 0.04472 | 0.71702 | 0.84576 | 0.24964 |
| I830077J02Rik | 7.68578 | 0.00187 | 0.08085 | 0.03246 | 0.0277  | 0.86307 | 1.15071 | 0.30932 |
| Zwilch        | 7.68472 | 0.00117 | 0.05408 | 0.08686 | 0.11119 | 0.57733 | 0.61854 | 0.39313 |



|               |         |         |         |         |         |         |         |         |
|---------------|---------|---------|---------|---------|---------|---------|---------|---------|
| Btla          | 7.67915 | 7.3E-13 | 0.21336 | 0.22845 | 0.21933 | 4.6668  | 4.89841 | 1.90465 |
| Cd300lf       | 7.56601 | 2.2E-05 | 0.26992 | 0.23482 | 0.12332 | 3.98306 | 4.07034 | 2.09977 |
| Ms4a14        | 7.54719 | 2.7E-05 | 0       | 0.06864 | 0.05858 | 0.93032 | 1.12963 | 0.26161 |
| Edn1          | 7.52939 | 1.8E-06 | 0.19764 | 0.39679 | 0.77883 | 17.9644 | 4.84734 | 2.38187 |
| Pappa         | 7.52693 | 2.1E-10 | 0.02101 | 0.09278 | 0.06478 | 1.60925 | 1.05175 | 0.45809 |
| Dhrs9         | 7.46868 | 0.0149  | 0.02705 | 0.02173 | 0.01854 | 0.52663 | 0.53632 | 0.1035  |
| Jchain        | 7.39094 | 0.00026 | 0.64421 | 2.18018 | 1.00911 | 28.3161 | 30.4765 | 7.00655 |
| Cd79b         | 7.38438 | 0.00304 | 0.24281 | 0       | 0.27733 | 4.6248  | 4.85452 | 0.37157 |
| Mettl21e      | 7.37766 | 0.00458 | 0       | 0.04696 | 0.02004 | 0.25705 | 0.54992 | 0.31323 |
| Cdc25c        | 7.31391 | 0.04885 | 0       | 0       | 0.04089 | 0.29975 | 0.36396 | 0.18263 |
| A530099J19Rik | 7.30361 | 0.00058 | 0       | 0.03354 | 0.05725 | 0.73434 | 0.7006  | 0.22371 |
| Tlr13         | 7.27354 | 1.2E-09 | 0.05705 | 0.13745 | 0.2346  | 3.67214 | 3.01607 | 0.82945 |
| Tmem200a      | 7.25159 | 7.9E-06 | 0.02815 | 0.06781 | 0.05787 | 0.84833 | 1.11591 | 0.45226 |
| Nxpe4         | 7.22195 | 2.2E-09 | 0.05878 | 0.11014 | 0.08057 | 1.21805 | 1.94213 | 0.62968 |
| 1810011H11Rik | 7.21541 | 0.00025 | 0       | 0.06314 | 0.10777 | 1.38244 | 1.03914 | 0.6618  |
| Fmod          | 7.21384 | 4.9E-05 | 0       | 0.22507 | 0.28811 | 3.56372 | 4.62993 | 0.56293 |
| Nsg2          | 7.20294 | 0.00371 | 0.02786 | 0.02237 | 0.01909 | 0.41988 | 0.43902 | 0.2345  |
| Fcgr3         | 7.20035 | 1.3E-09 | 0.80059 | 0.48219 | 0.91444 | 19.9411 | 13.2596 | 3.9818  |
| F730311O21Rik | 7.1958  | 2.5E-05 | 0.04253 | 0.03415 | 0.05829 | 0.8278  | 1.14565 | 0.27658 |
| Fcgr1         | 7.17533 | 0.00013 | 0.13421 | 0.03592 | 0.18395 | 3.48322 | 2.36486 | 0.44499 |
| Cd86          | 7.12845 | 3.4E-09 | 0.09491 | 0.02541 | 0.21681 | 2.72152 | 2.07441 | 0.89565 |
| Trbc2         | 7.10069 | 0.00022 | 0.16737 | 0       | 0.91761 | 5.88536 | 9.01786 | 1.92097 |
| Srpx2         | 7.07272 | 5.9E-06 | 0       | 0.15915 | 0.08149 | 2.16536 | 1.57151 | 0.36394 |
| Igf1          | 7.06102 | 5.5E-16 | 0.2105  | 0.4226  | 0.43277 | 6.38117 | 8.54181 | 2.50543 |
| Wnt7a         | 7.04466 | 3E-07   | 0       | 0.05864 | 0.10009 | 1.23809 | 1.07646 | 0.41908 |
| Mxd3          | 7.04257 | 0.02101 | 0.05566 | 0.04469 | 0       | 0.7339  | 0.48093 | 0.25551 |
| Ackr3         | 6.9236  | 3E-10   | 0.27675 | 0.52783 | 0.26078 | 8.99303 | 6.43576 | 2.0117  |
| Ly6d          | 6.90516 | 0.02279 | 0.15567 | 0.12501 | 0.10668 | 3.22576 | 2.37384 | 0.59557 |
| Hrh2          | 6.90369 | 0.00018 | 0       | 0       | 0.05349 | 0.3186  | 0.55548 | 0.23891 |
| Olfr550       | 6.87984 | 0.00584 | 0       | 0       | 0.03202 | 0.2347  | 0.26123 | 0.08937 |
| Cd180         | 6.84494 | 3.3E-06 | 0.1798  | 0.12376 | 0.10562 | 1.7742  | 2.29793 | 0.74686 |
| Ntm           | 6.83198 | 0.02924 | 0.01434 | 0       | 0.00982 | 0.17104 | 0.1093  | 0.08775 |
| Cmah          | 6.81239 | 1.4E-20 | 0.20906 | 0.27981 | 0.32634 | 3.63194 | 5.71475 | 2.9238  |
| Hist1h2ak     | 6.80881 | 0.00265 | 1.47353 | 0.23666 | 0.20197 | 12.9538 | 11.235  | 2.48047 |
| Cxcl9         | 6.79593 | 0.00383 | 0.0384  | 0.09252 | 0.07895 | 2.36312 | 0.97598 | 0.20568 |
| Gcnt4         | 6.77274 | 0.00044 | 0       | 0.05479 | 0       | 0.29987 | 0.3699  | 0.1566  |
| Slc27a6       | 6.75714 | 2.8E-06 | 0       | 0.14971 | 0.1597  | 1.60963 | 2.5349  | 0.78457 |
| Ulbp1         | 6.75652 | 0.01706 | 0.06367 | 0       | 0.08727 | 0.95955 | 1.22986 | 0.19488 |
| Ly6c2         | 6.74214 | 0.00111 | 0.12681 | 0.16972 | 0.26071 | 3.07892 | 1.86927 | 0.67921 |
| Clec4a3       | 6.73334 | 0.00013 | 0.08728 | 0.07009 | 0.23926 | 2.84986 | 2.9724  | 0.60104 |
| Zfp991        | 6.68507 | 0.03503 | 0.15882 | 0.06377 | 0       | 2.06934 | 2.28058 | 0.91142 |
| S100a4        | 6.65803 | 4.5E-09 | 1.18992 | 2.22966 | 0.95139 | 29.5139 | 26.7139 | 7.13213 |
| Nrcam         | 6.64436 | 5.8E-11 | 0.12222 | 0.28218 | 0.18846 | 4.27858 | 4.06143 | 0.98195 |
| Havcr2        | 6.61398 | 1.2E-08 | 0.12769 | 0.06836 | 0.32088 | 3.31424 | 3.24539 | 1.43304 |
| Mpeg1         | 6.6092  | 2E-14   | 1.25571 | 2.14553 | 2.65492 | 44.5081 | 40.171  | 11.1415 |
| Tnip3         | 6.55026 | 7.2E-05 | 0.07641 | 0.02045 | 0.06982 | 0.71974 | 1.29473 | 0.40929 |
| Rasgrp1       | 6.5223  | 2.8E-09 | 0.14477 | 0.09965 | 0.15591 | 2.28568 | 2.90152 | 0.85456 |
| Ptger3        | 6.4755  | 0.00062 | 0       | 0.01635 | 0.05582 | 0.33243 | 0.58996 | 0.21812 |
| Kcnj10        | 6.47493 | 0.02249 | 0       | 0.0172  | 0.01468 | 0.20176 | 0.25042 | 0.04917 |
| Ms4a6c        | 6.47227 | 5.2E-09 | 0.16949 | 0.40833 | 0.46462 | 9.04643 | 6.86354 | 1.77241 |
| Gm4070        | 6.47179 | 0.00069 | 0.03746 | 1.77494 | 0.53058 | 13.5181 | 5.82683 | 2.39825 |
| Ms4a7         | 6.45773 | 8.1E-07 | 0.10404 | 0.10443 | 0.12477 | 2.23748 | 2.31361 | 0.51743 |
| Cd8a          | 6.43705 | 4.8E-05 | 0.12738 | 0.07672 | 0.10912 | 2.01962 | 1.52156 | 0.73099 |
| Ctsd          | 6.42998 | 3.2E-09 | 5.41902 | 16.0619 | 13.5721 | 196.432 | 130.463 | 45.0076 |
| Slc28a2       | 6.41782 | 1.2E-05 | 0.08257 | 0.08841 | 0.03772 | 1.1061  | 1.52495 | 0.5265  |
| Tgfbi         | 6.41458 | 3.4E-19 | 1.21095 | 1.7018  | 2.34147 | 35.4126 | 35.0854 | 10.0931 |

|               |         |         |         |         |         |         |         |         |
|---------------|---------|---------|---------|---------|---------|---------|---------|---------|
| Gtse1         | 6.41101 | 9.2E-06 | 0.08513 | 0.06836 | 0.08751 | 1.36312 | 1.34143 | 0.68395 |
| Mmp19         | 6.38787 | 5.3E-13 | 0.03396 | 0.79098 | 0.48881 | 9.25607 | 7.56177 | 2.80675 |
| Mt2           | 6.36495 | 2.1E-08 | 1.57577 | 3.63809 | 2.69976 | 80.3946 | 30.2366 | 12.2079 |
| Fscn1         | 6.36429 | 1.3E-15 | 0.42298 | 0.64847 | 0.94868 | 12.6764 | 11.8251 | 5.14894 |
| Scarb1        | 6.33923 | 4.4E-16 | 0.3876  | 0.77075 | 0.59451 | 11.4276 | 10.8548 | 3.7143  |
| Prr11         | 6.32145 | 0.00064 | 0       | 0.09729 | 0.04151 | 0.98895 | 0.89292 | 0.20857 |
| Kif20a        | 6.31613 | 0.00285 | 0.12204 | 0.07351 | 0.08364 | 1.51353 | 1.14765 | 0.35019 |
| Calcr1        | 6.28613 | 1.6E-08 | 1.3997  | 2.97201 | 3.64186 | 52.9284 | 49.4172 | 14.7398 |
| C1qc          | 6.27537 | 2.1E-10 | 0.8397  | 1.20415 | 1.10982 | 27.6443 | 17.8047 | 3.71738 |
| Igsf6         | 6.25661 | 0.00994 | 0.3195  | 0.21381 | 0.18247 | 3.67811 | 3.43754 | 1.34459 |
| Efna2         | 6.24653 | 0.04382 | 0       | 0.04365 | 0.03725 | 0.64843 | 0.49727 | 0.12476 |
| Atp1a3        | 6.244   | 8.5E-08 | 0.0972  | 0.10927 | 0.09325 | 1.84318 | 1.80823 | 0.62472 |
| Ltbp2         | 6.20155 | 1.5E-29 | 1.13215 | 2.898   | 2.79318 | 38.1137 | 38.4994 | 16.0479 |
| Icos          | 6.17758 | 3.7E-05 | 0       | 0.10846 | 0.04628 | 0.99654 | 0.92684 | 0.31004 |
| Adamts12      | 6.17536 | 3.5E-09 | 0.01858 | 0.32823 | 0.16552 | 3.03318 | 3.22971 | 0.9098  |
| Nipal1        | 6.11603 | 0.0049  | 0       | 0.04234 | 0.01807 | 0.41388 | 0.28142 | 0.18156 |
| Ms4a4b        | 6.1032  | 0.00016 | 0.08784 | 0.05291 | 0.1204  | 1.8478  | 1.87531 | 0.33607 |
| Milr1         | 6.09884 | 0.00809 | 0.14044 | 0.07519 | 0.16041 | 0.97007 | 1.07082 | 0.32239 |
| Rnf152        | 6.09721 | 2.3E-07 | 0       | 0.06541 | 0.06512 | 0.65634 | 0.80731 | 0.20774 |
| Cr2           | 6.07596 | 0.00099 | 0.07139 | 0.0344  | 0.02935 | 0.80687 | 0.78379 | 0.29496 |
| Hist1h2bj     | 6.07509 | 0.01549 | 0.75045 | 0.60265 | 0.34286 | 16.3359 | 8.51918 | 2.29686 |
| Ndnf          | 6.04449 | 2E-14   | 0.48096 | 1.28744 | 1.25565 | 15.7188 | 18.8302 | 6.52781 |
| Emp3          | 6.03983 | 1.9E-05 | 0.21628 | 1.04211 | 0.37056 | 13.5131 | 8.52013 | 1.48942 |
| Brinp1        | 6.03682 | 2.6E-08 | 0.07495 | 0.06019 | 0.12841 | 1.80021 | 1.30487 | 0.58784 |
| B2m           | 6.02054 | 1.4E-05 | 11.5819 | 14.0594 | 8.30647 | 277.882 | 140.675 | 26.277  |
| Fbln5         | 5.99337 | 1.2E-06 | 0.05961 | 0.38295 | 0.36766 | 5.2277  | 5.09026 | 0.92741 |
| Pik3cg        | 5.92708 | 3.5E-12 | 0.18774 | 0.20559 | 0.19884 | 3.71883 | 3.40944 | 1.08392 |
| Ly86          | 5.92603 | 6.6E-05 | 0.46467 | 0.65302 | 0.47767 | 10.7229 | 10.6287 | 1.51108 |
| Ccl7          | 5.91333 | 0.0379  | 0.14459 | 0.11612 | 0.09909 | 1.6343  | 2.35191 | 0.66382 |
| Scube1        | 5.8788  | 1.4E-19 | 0.11102 | 0.24517 | 0.26629 | 3.62498 | 3.407   | 1.36976 |
| H19           | 5.8355  | 0.0066  | 0.04883 | 0.11763 | 0.03346 | 1.16509 | 0.94313 | 0.48569 |
| Hist1h2bm     | 5.80251 | 0.03926 | 0.30399 | 0.24412 | 0.20833 | 6.29912 | 4.63554 | 0.6978  |
| Epha3         | 5.78047 | 1E-05   | 0.02047 | 0.09861 | 0.11221 | 1.3494  | 1.55007 | 0.29754 |
| Svep1         | 5.77328 | 3.5E-12 | 0.17965 | 0.54823 | 0.62545 | 8.58708 | 6.56764 | 2.35889 |
| Lamc2         | 5.74524 | 4.3E-12 | 0.24492 | 1.11069 | 1.0071  | 13.9138 | 12.7937 | 3.71503 |
| Angptl4       | 5.72635 | 6.8E-07 | 0.17623 | 0.36796 | 0.72465 | 10.7562 | 5.60765 | 1.34846 |
| Gm32200       | 5.71166 | 0.02535 | 0       | 0.039   | 0.03328 | 0.24395 | 0.49368 | 0.2601  |
| B430203G13Rik | 5.70092 | 0.02432 | 0       | 0.06764 | 0.17318 | 0.89916 | 0.81349 | 0.38671 |
| Csmd1         | 5.69422 | 2.3E-11 | 0.04869 | 0.02932 | 0.05005 | 0.53503 | 0.60944 | 0.43309 |
| Samsn1        | 5.69341 | 3.9E-05 | 0.10218 | 0.10257 | 0.05252 | 1.70026 | 1.35038 | 0.29319 |
| Slc29a3       | 5.68193 | 2.4E-10 | 0.07941 | 0.30291 | 0.36734 | 4.69965 | 4.20798 | 1.00256 |
| Pla2g7        | 5.66806 | 9.6E-08 | 0.11961 | 0.25613 | 0.40984 | 4.48124 | 3.62753 | 1.03721 |
| Col28a1       | 5.66035 | 1.4E-08 | 0.04723 | 0.15173 | 0.19422 | 1.69062 | 2.04081 | 1.22883 |
| Cd300a        | 5.64736 | 9.2E-10 | 0.12222 | 0.15704 | 0.18428 | 2.50198 | 2.13716 | 1.04744 |
| Espl1         | 5.62755 | 2E-11   | 0.01747 | 0.07014 | 0.13169 | 1.12983 | 1.0833  | 0.66833 |
| Cd84          | 5.59801 | 3.6E-13 | 0.29546 | 0.26693 | 0.55683 | 5.49621 | 6.99285 | 2.37377 |
| Cd200r1       | 5.58964 | 6.9E-06 | 0.11388 | 0.22863 | 0.11707 | 2.28834 | 2.54704 | 0.82782 |
| P4ha3         | 5.57688 | 3.5E-08 | 0.07389 | 0.14834 | 0.22786 | 2.29662 | 2.36612 | 1.10246 |
| Bcl11a        | 5.5706  | 4.1E-05 | 0.15823 | 0.11295 | 0.07229 | 1.24752 | 1.31371 | 0.41031 |
| Gcsam         | 5.53857 | 0.03675 | 0       | 0.02716 | 0.04636 | 0.531   | 0.46423 | 0.05176 |
| Kcnt1         | 5.50859 | 0.03381 | 0.02439 | 0.00979 | 0.01671 | 0.18375 | 0.24171 | 0.17726 |
| Slco5a1       | 5.50707 | 1.9E-05 | 0.00882 | 0.0354  | 0.01208 | 0.19376 | 0.29577 | 0.18214 |
| Thbs2         | 5.49474 | 0.00028 | 0.01956 | 0.14135 | 0.08042 | 1.52281 | 1.29235 | 0.29929 |
| Nlrc4         | 5.48568 | 0.00065 | 0.06035 | 0.09693 | 0       | 0.54952 | 0.76695 | 0.43872 |
| Clec2i        | 5.45768 | 0.00117 | 0.14896 | 0.05981 | 0.05104 | 1.00554 | 1.49545 | 0.54141 |
| Mctp1         | 5.41662 | 3E-13   | 0.18377 | 0.2384  | 0.21313 | 2.87603 | 3.39159 | 1.50351 |

|           |         |         |         |         |         |         |         |         |
|-----------|---------|---------|---------|---------|---------|---------|---------|---------|
| Tmem88    | 5.41448 | 0.00047 | 0.07321 | 0.23517 | 0.15052 | 2.02273 | 2.90263 | 0.78425 |
| Rad54b    | 5.40532 | 0.04635 | 0       | 0.01609 | 0.04118 | 0.16351 | 0.19345 | 0.09196 |
| Nlrp1a    | 5.40431 | 0.00711 | 0.0278  | 0.04465 | 0.01905 | 0.3666  | 0.46634 | 0.234   |
| Kcnk13    | 5.39769 | 5.2E-06 | 0.11165 | 0.11955 | 0.12753 | 2.0799  | 1.58907 | 0.68345 |
| Mfap4     | 5.39363 | 5.9E-07 | 2.04883 | 5.08112 | 4.95565 | 90.2834 | 52.1939 | 13.4176 |
| Tlr7      | 5.39113 | 1.5E-05 | 0.08512 | 0.13671 | 0.175   | 2.7259  | 1.87488 | 0.52104 |
| Lcn2      | 5.36518 | 0.00016 | 1.98699 | 0.85101 | 1.05911 | 38.7337 | 17.3494 | 5.43954 |
| Ctla4     | 5.35566 | 0.00613 | 0       | 0.07984 | 0.06813 | 0.37456 | 1.08647 | 0.38035 |
| Cnrip1    | 5.3447  | 0.00047 | 0.05787 | 0.11617 | 0.07931 | 0.79939 | 0.79417 | 0.26566 |
| Txk       | 5.34245 | 0.0028  | 0.03388 | 0.0136  | 0.02322 | 0.2872  | 0.33582 | 0.18147 |
| Kntc1     | 5.33146 | 5.6E-06 | 0.04352 | 0.05825 | 0.03977 | 0.51928 | 0.58259 | 0.49955 |
| Lair1     | 5.33145 | 7.5E-06 | 0.06198 | 0.06221 | 0.14866 | 1.37183 | 1.77992 | 0.39123 |
| C1qa      | 5.31258 | 5E-11   | 3.00684 | 3.66669 | 3.89233 | 67.8312 | 52.588  | 16.9572 |
| Hgf       | 5.31116 | 2.8E-07 | 0.08059 | 0.11649 | 0.20986 | 2.33785 | 2.03993 | 0.72761 |
| Serpine1  | 5.3098  | 6.6E-09 | 0.56774 | 1.91968 | 0.8396  | 23.2664 | 13.3964 | 4.66424 |
| Hbegf     | 5.30452 | 3.8E-17 | 0.39046 | 0.90147 | 0.66897 | 8.45868 | 9.82429 | 4.78021 |
| Tnfaip8l2 | 5.29745 | 0.0002  | 0.10323 | 0.58027 | 0.14148 | 5.31511 | 3.83031 | 0.94781 |
| Gpm6a     | 5.29455 | 0.00013 | 0.03602 | 0.11572 | 0.19751 | 1.74181 | 2.17906 | 0.49616 |
| Slamf1    | 5.29072 | 0.00965 | 0       | 0.01511 | 0.02579 | 0.20084 | 0.22952 | 0.10077 |
| Ptafr     | 5.28977 | 4.5E-09 | 0.12738 | 0.23016 | 0.28371 | 3.25938 | 3.3021  | 1.24269 |
| Birc5     | 5.28142 | 0.00054 | 0.10213 | 0.02734 | 0.11666 | 1.3254  | 1.12482 | 0.54704 |
| Mex3b     | 5.27989 | 0.00014 | 0.10356 | 0.05544 | 0.07097 | 1.21391 | 0.94756 | 0.44905 |
| Esm1      | 5.27666 | 0.02846 | 0.11046 | 0.6653  | 0.60561 | 0.86703 | 1.23526 | 0.97199 |
| Rbm46     | 5.25739 | 0.00585 | 0       | 0.03722 | 0.06352 | 0.43653 | 0.51828 | 0.35462 |
| Vps25     | 5.2569  | 0.01136 | 0.14107 | 0.56644 | 0.43505 | 9.38974 | 6.20264 | 1.40325 |
| Cd3e      | 5.21733 | 5.8E-06 | 0.17032 | 0.20517 | 0.13618 | 2.06771 | 2.02009 | 0.58646 |
| C1qtnf6   | 5.21341 | 3.5E-14 | 0.28931 | 0.69698 | 0.62785 | 7.32712 | 8.60276 | 3.17293 |
| Cers6     | 5.20824 | 1E-16   | 0.17469 | 0.6079  | 0.64847 | 8.05327 | 6.37107 | 2.56193 |
| Slamf6    | 5.20746 | 0.00072 | 0.07861 | 0.01263 | 0.05387 | 0.76014 | 0.7272  | 0.26465 |
| Hist1h2ab | 5.18261 | 0.0038  | 0.97944 | 0       | 1.34246 | 10.7629 | 8.71246 | 1.87358 |
| Cdkn2b    | 5.1666  | 4.6E-08 | 0.49886 | 0.20031 | 0.45584 | 4.95979 | 5.53636 | 2.48112 |
| Scel      | 5.14572 | 2E-07   | 0.34143 | 0.33511 | 0.38998 | 5.62181 | 5.18716 | 2.00289 |
| Ly9       | 5.13629 | 0.00071 | 0.17511 | 0.28125 | 0.16801 | 2.74895 | 2.36767 | 0.53596 |
| Galns     | 5.12962 | 3.4E-05 | 0.08741 | 0.56156 | 0.20966 | 3.54026 | 3.11018 | 1.03669 |
| Ly6c1     | 5.11401 | 1.5E-09 | 1.51939 | 2.99491 | 3.21846 | 54.2086 | 32.051  | 9.19498 |
| Robo2     | 5.10329 | 2.1E-12 | 0.03506 | 0.21399 | 0.20665 | 2.17087 | 2.14583 | 0.86925 |
| St8sia4   | 5.09083 | 2.3E-06 | 0.08226 | 0.07707 | 0.14563 | 1.43335 | 1.6899  | 0.535   |
| Cd33      | 5.08303 | 1E-07   | 0.05962 | 0.21544 | 0.26556 | 3.13515 | 2.43182 | 0.82109 |
| Colec12   | 5.07836 | 1.6E-06 | 0.41837 | 1.45588 | 1.33801 | 19.5717 | 13.3621 | 2.93446 |
| Cd300c2   | 5.06424 | 6.5E-11 | 0.18168 | 0.87538 | 0.74704 | 8.78419 | 8.49594 | 3.68384 |
| Haoa      | 5.06289 | 0.00268 | 0       | 0.22834 | 0.06495 | 1.42834 | 1.39711 | 0.58017 |
| Kif15     | 5.05763 | 4E-05   | 0.04811 | 0.07727 | 0.04945 | 0.7552  | 0.63579 | 0.52455 |
| Parpbp    | 5.04361 | 0.03519 | 0       | 0.07764 | 0.02208 | 0.50589 | 0.39313 | 0.17261 |
| Slfn10-ps | 5.04151 | 0.00055 | 0.09596 | 0.10274 | 0.08768 | 1.00423 | 0.95924 | 0.48948 |
| Lpar5     | 5.03378 | 0.04573 | 0       | 0.06139 | 0.10478 | 0.67206 | 0.89376 | 0.46796 |
| Itgam_1   | 5.01565 | 7.7E-09 | 0.66854 | 0.70349 | 0.55296 | 6.54304 | 5.27311 | 2.593   |
| F2r       | 4.99654 | 2.7E-10 | 1.15574 | 3.37497 | 3.12019 | 39.8268 | 37.046  | 10.7995 |
| Nusap1    | 4.99163 | 0.0004  | 0.05707 | 0.06874 | 0.09777 | 1.30796 | 1.08779 | 0.24016 |
| Gpr65     | 4.98897 | 0.00046 | 0.28262 | 0.13618 | 0.11621 | 2.52004 | 2.58586 | 0.73526 |
| Mmp14     | 4.98776 | 1.9E-23 | 0.97327 | 1.8237  | 2.12452 | 26.234  | 22.3172 | 8.5228  |
| Cd302     | 4.97025 | 0.00049 | 0       | 0.61823 | 0.64483 | 8.91621 | 5.7393  | 0.58906 |
| Fbxo5     | 4.96171 | 0.00206 | 0       | 0.09287 | 0.11888 | 1.19819 | 0.99931 | 0.35395 |
| Etv4      | 4.94253 | 0.00093 | 0       | 0.05993 | 0.15343 | 0.49203 | 0.85348 | 0.97071 |
| Pcdh18    | 4.94126 | 5.6E-07 | 0.21584 | 0.24266 | 0.19229 | 2.92748 | 3.51078 | 1.07349 |
| Hist1h2ap | 4.93161 | 0.02413 | 1.92231 | 1.15778 | 0.82337 | 28.8189 | 19.5424 | 4.78036 |
| Ccdc80    | 4.91425 | 1.8E-08 | 0.27976 | 1.30302 | 0.76689 | 13.948  | 10.5229 | 2.35465 |



|           |         |         |         |         |         |         |         |         |
|-----------|---------|---------|---------|---------|---------|---------|---------|---------|
| Gyg       | 4.89009 | 1.4E-05 | 0.69175 | 1.07135 | 1.11745 | 16.8784 | 15.195  | 2.75994 |
| Xlr4b     | 4.88255 | 0.03661 | 0       | 0.07266 | 0.06201 | 0.56817 | 0.73589 | 0.48464 |
| Csf2rb    | 4.88196 | 1.7E-14 | 0.63209 | 0.99568 | 0.6831  | 11.9226 | 11.2083 | 4.31569 |
| Syt15     | 4.84097 | 0.00021 | 0       | 0.28812 | 0.18441 | 0.9434  | 2.35941 | 1.33832 |
| Cxcr5     | 4.83989 | 0.00311 | 0.06952 | 0.16748 | 0.04764 | 1.24412 | 1.50182 | 0.37236 |
| Gda       | 4.83176 | 3.3E-14 | 0.4342  | 0.66705 | 0.72451 | 9.06855 | 8.93386 | 2.83124 |
| Hexb      | 4.83146 | 1E-06   | 0.60829 | 1.90511 | 1.08387 | 21.5429 | 15.3671 | 2.79266 |
| Aif1l     | 4.82581 | 0.00073 | 0       | 0.0692  | 0.03937 | 0.54112 | 0.48183 | 0.19781 |
| Ap1s2     | 4.82294 | 3.2E-06 | 0.20994 | 0.14986 | 0.43164 | 4.39433 | 3.50975 | 1.12449 |
| Fam111a   | 4.80844 | 0.00615 | 0.2527  | 0.40586 | 0.3656  | 4.65448 | 3.82485 | 1.89057 |
| Nlrc3     | 4.80596 | 1.1E-10 | 0.1147  | 0.15791 | 0.13476 | 1.58458 | 1.59089 | 1.07829 |
| Abcg1     | 4.80527 | 5.5E-12 | 0.65515 | 1.09799 | 0.89797 | 14.0945 | 12.2492 | 3.94499 |
| Cxcl14    | 4.79539 | 4.2E-07 | 0.88945 | 2.44894 | 2.83008 | 33.6304 | 29.5164 | 6.36824 |
| Ckap2     | 4.78537 | 5.8E-06 | 0.07205 | 0.05786 | 0.19751 | 1.42512 | 1.50154 | 0.68912 |
| Lgals1    | 4.78108 | 0.00035 | 1.88206 | 5.11547 | 2.38119 | 70.999  | 32.4528 | 7.08964 |
| Bst1      | 4.77631 | 0.0001  | 0.10475 | 0.2804  | 0.14357 | 3.22302 | 2.21855 | 0.61449 |
| Slc15a1   | 4.7742  | 0.0127  | 0       | 0.02978 | 0.05083 | 0.51232 | 0.28276 | 0.17026 |
| Tnfrsf13b | 4.7708  | 1.7E-05 | 0.12252 | 0.09839 | 0.27988 | 2.20538 | 2.55331 | 0.81246 |
| Ms4a6b    | 4.76396 | 5.1E-07 | 0.23241 | 0.20738 | 0.28316 | 4.08629 | 3.18968 | 0.96821 |
| Prcp      | 4.75307 | 4.8E-09 | 0.19023 | 0.48376 | 0.9995  | 8.26208 | 7.42942 | 2.57152 |
| Adgrl4    | 4.73006 | 7.1E-09 | 0.2526  | 0.93313 | 1.03869 | 12.2453 | 8.97515 | 2.91858 |
| Tk1       | 4.72586 | 0.01342 | 0.2451  | 0.76941 | 0.53445 | 2.40649 | 2.43504 | 1.31277 |
| Acp5      | 4.67989 | 0.00325 | 0.62759 | 0.50399 | 0.2346  | 6.44863 | 5.10412 | 1.1787  |
| Tlr9      | 4.67558 | 1.7E-05 | 0.0999  | 0.16045 | 0.3195  | 3.26202 | 2.45438 | 0.76441 |
| Pglyrp2   | 4.67035 | 0.00995 | 0.05175 | 0.08312 | 0.07093 | 0.61743 | 1.10482 | 0.39598 |
| Plbd1     | 4.66958 | 2.1E-05 | 0.21994 | 0.52986 | 0.87422 | 9.4464  | 7.37848 | 1.41362 |
| Ube2l3    | 4.6284  | 0.03208 | 1.03428 | 1.46183 | 1.46016 | 6.61148 | 6.08796 | 1.96266 |
| Pld4      | 4.6259  | 4.2E-11 | 0.52698 | 1.0815  | 0.96307 | 13.1996 | 11.0123 | 3.53945 |
| Igfbp2    | 4.61676 | 3.2E-07 | 0.31353 | 2.92068 | 3.309   | 31.894  | 23.1087 | 10.076  |
| Gjb3      | 4.59274 | 0.02769 | 0.05891 | 0.04731 | 0.12112 | 1.14675 | 1.19779 | 0.13523 |
| Cldn4     | 4.59248 | 3.3E-10 | 0.89288 | 1.12676 | 1.61718 | 9.25097 | 16.8574 | 10.1992 |
| Myct1     | 4.57076 | 0.00075 | 0.12213 | 0.16346 | 0.22319 | 2.40291 | 2.3383  | 0.71644 |
| Neil3     | 4.56865 | 0.00334 | 0.02085 | 0.05023 | 0.04287 | 0.47131 | 0.4875  | 0.2393  |
| Eln       | 4.56417 | 1.9E-14 | 9.5443  | 16.3959 | 17.8299 | 154.256 | 181.86  | 108.543 |
| Hbb-bs    | 4.56256 | 0.04329 | 5.12741 | 5.44972 | 2.2737  | 12.2157 | 12.0349 | 58.965  |
| Phf11c    | 4.55951 | 0.00675 | 0.06697 | 0.05378 | 0.04589 | 0.77793 | 0.71483 | 0.23058 |
| Thbs1     | 4.55573 | 2.5E-09 | 4.34823 | 11.9917 | 7.56742 | 138.591 | 86.4894 | 29.4332 |
| Lrg1      | 4.55315 | 4.4E-14 | 1.97176 | 2.82262 | 4.05384 | 44.8416 | 35.3838 | 14.3656 |
| Gpr35     | 4.55223 | 4.9E-08 | 0.14361 | 0.26909 | 0.21324 | 2.94572 | 2.48187 | 1.0622  |
| Smarca1   | 4.54305 | 0.00178 | 0       | 0.0304  | 0.03892 | 0.33284 | 0.30792 | 0.11588 |
| Spry4     | 4.53775 | 3.7E-12 | 0.45449 | 0.75023 | 0.91711 | 8.38722 | 8.98407 | 4.40495 |
| Dpep2     | 4.53569 | 4.1E-06 | 0       | 0.08195 | 0.36714 | 1.71403 | 1.99696 | 0.93696 |
| Enox1     | 4.53555 | 0.00376 | 0       | 0       | 0.11355 | 0.33294 | 0.47164 | 0.45641 |
| Slfn8     | 4.53285 | 6.2E-08 | 0.14155 | 0.40923 | 0.34923 | 3.7332  | 3.29541 | 1.68966 |
| Ccl17     | 4.50454 | 0.00628 | 1.12665 | 0.18095 | 1.23538 | 17.1204 | 8.0175  | 3.10344 |
| Mthfsl    | 4.50311 | 0.02234 | 0.10963 | 0.13205 | 0.03756 | 1.03255 | 0.80798 | 0.54523 |
| Lrrc8c    | 4.49716 | 7.5E-16 | 0.36316 | 0.99643 | 0.95405 | 11.3071 | 8.97607 | 3.54297 |
| Igha      | 4.48119 | 7.6E-06 | 7.59684 | 22.9733 | 11.9595 | 196.644 | 183.278 | 58.6264 |
| Cd93      | 4.48092 | 3.6E-07 | 1.00607 | 2.52128 | 3.28096 | 35.5517 | 24.5731 | 9.35712 |
| Tifab     | 4.47461 | 1.9E-06 | 0.36421 | 0.18612 | 0.22691 | 3.26416 | 3.39966 | 1.2414  |
| Tmem26    | 4.4694  | 0.00408 | 0       | 0.09205 | 0.03142 | 0.3311  | 0.69918 | 0.2105  |
| C1qb      | 4.46694 | 4.4E-08 | 4.79032 | 3.67589 | 4.96081 | 71.8573 | 60.6028 | 20.4446 |
| Sh2b2     | 4.4642  | 6.9E-06 | 0.10469 | 0.30825 | 0.23915 | 2.43224 | 2.19947 | 1.70886 |
| Al506816  | 4.46313 | 3.7E-08 | 1.34419 | 1.50621 | 1.00689 | 11.6401 | 7.21392 | 2.96598 |
| Fbn1      | 4.46204 | 2.7E-16 | 1.48021 | 3.68875 | 3.65843 | 39.1035 | 36.547  | 12.634  |
| Vstm4     | 4.46191 | 4.8E-09 | 0.12676 | 0.40719 | 0.46332 | 4.13911 | 4.91847 | 1.29326 |



|               |         |         |         |         |         |         |         |         |
|---------------|---------|---------|---------|---------|---------|---------|---------|---------|
| Ticrr         | 4.45817 | 0.00012 | 0       | 0.00996 | 0.06801 | 0.31159 | 0.30268 | 0.15188 |
| Cd79a         | 4.44765 | 0.0228  | 0.87441 | 0.19151 | 0.21791 | 7.73683 | 6.70737 | 1.09483 |
| Il4i1         | 4.44384 | 0.00394 | 0.28387 | 0.09118 | 0.29181 | 1.2121  | 1.64493 | 1.02087 |
| Gria3         | 4.44224 | 7.7E-10 | 0.08223 | 0.33019 | 0.24152 | 2.87689 | 2.59156 | 1.07866 |
| Fkbp7         | 4.43532 | 0.00382 | 0.15599 | 0.37579 | 0.1069  | 3.72202 | 2.10113 | 0.65645 |
| Hsd11b2       | 4.42424 | 0.00403 | 0.06295 | 0.1011  | 0.12941 | 1.18575 | 1.31181 | 0.43347 |
| Dab2          | 4.41276 | 2.2E-08 | 0.36282 | 0.78542 | 0.63784 | 9.74702 | 7.12839 | 1.99161 |
| Foxred2       | 4.40945 | 0.00836 | 0.039   | 0.04698 | 0.04009 | 0.62452 | 0.36677 | 0.25367 |
| Skap1         | 4.40867 | 6.2E-05 | 0.03104 | 0.06232 | 0.07446 | 0.61401 | 0.8284  | 0.30878 |
| Bgn           | 4.40376 | 1.1E-09 | 5.13596 | 15.0098 | 13.6558 | 175.702 | 126.021 | 39.9203 |
| Cdh5          | 4.39974 | 2.1E-06 | 1.7636  | 4.11601 | 4.40017 | 60.164  | 37.4266 | 10.0365 |
| Cdh11         | 4.38775 | 1.4E-08 | 0.23414 | 0.63719 | 0.64183 | 6.80379 | 6.69774 | 1.69199 |
| Aspm          | 4.38728 | 2.1E-06 | 0.02998 | 0.05617 | 0.11642 | 0.86594 | 0.78224 | 0.39761 |
| Sparc         | 4.36424 | 9.9E-15 | 7.42979 | 22.8102 | 22.9025 | 235.343 | 209.966 | 72.5481 |
| Pkib          | 4.35628 | 0.00088 | 0.02945 | 0.04729 | 0.02691 | 0.30816 | 0.50889 | 0.12016 |
| Slc40a1       | 4.35594 | 2.6E-05 | 0.01713 | 0.13757 | 0.10566 | 0.83902 | 1.34966 | 0.39323 |
| Itgax         | 4.35241 | 6.6E-09 | 1.15747 | 0.81332 | 0.97502 | 13.0371 | 13.8874 | 5.81209 |
| Slamf7        | 4.34534 | 2.4E-06 | 0.17713 | 0.42674 | 0.29481 | 4.60795 | 2.82973 | 1.49089 |
| Lgmn          | 4.33565 | 6.5E-18 | 2.04416 | 3.84366 | 4.27104 | 48.6511 | 39.3067 | 14.9545 |
| Il9r          | 4.3265  | 0.03315 | 0.09365 | 0.0376  | 0.04813 | 0.57334 | 0.69022 | 0.42994 |
| Lgals3        | 4.32641 | 5.8E-09 | 0.93503 | 2.95345 | 2.13598 | 33.5449 | 21.7044 | 6.10518 |
| Psrc1         | 4.32467 | 4.3E-06 | 0.11536 | 0.40143 | 0.47434 | 2.63186 | 3.1273  | 3.17763 |
| Ctsw          | 4.32419 | 0.00837 | 0.09401 | 0.45296 | 0.12885 | 2.95155 | 2.2459  | 1.29478 |
| Ajap1         | 4.3193  | 0.03347 | 0       | 0.06103 | 0.02604 | 0.3579  | 0.27041 | 0.26167 |
| Tmem252       | 4.31492 | 3.4E-06 | 0.51747 | 0.75555 | 0.70926 | 11.0478 | 6.16929 | 3.02361 |
| Bank1         | 4.3105  | 0.00417 | 0.29396 | 0.17394 | 0.13784 | 1.90413 | 2.36712 | 0.50904 |
| Lhx6          | 4.30056 | 4.8E-06 | 0.0241  | 0.15485 | 0.11563 | 0.75678 | 1.10269 | 0.90373 |
| Dsn1          | 4.29592 | 0.00213 | 0.06906 | 0.08319 | 0.071   | 0.60714 | 0.87763 | 0.58129 |
| Ifi27l2a      | 4.29386 | 0.00025 | 1.0006  | 1.2053  | 2.22861 | 28.1166 | 12.4609 | 5.35934 |
| Pgap1         | 4.29008 | 3.8E-08 | 0.04364 | 0.11388 | 0.14952 | 1.3015  | 1.33635 | 0.4257  |
| Fgr           | 4.28663 | 7.8E-10 | 0.17989 | 0.33708 | 0.45203 | 3.61466 | 4.11474 | 1.72056 |
| Gins3         | 4.28104 | 0.00507 | 0.04275 | 0.03433 | 0.1172  | 0.61746 | 0.86927 | 0.42527 |
| Palb2         | 4.28104 | 0.00051 | 0.02135 | 0.0343  | 0.07317 | 0.34861 | 0.55355 | 0.35945 |
| Il20rb        | 4.27627 | 0.00369 | 0.02754 | 0.06634 | 0.07549 | 0.44957 | 0.64386 | 0.50568 |
| Cpxm1         | 4.27464 | 1.6E-08 | 0.14287 | 0.95609 | 1.27284 | 12.5895 | 7.72202 | 3.06091 |
| F7            | 4.27317 | 1.5E-06 | 0.43611 | 0.30019 | 0.46966 | 5.28136 | 4.40189 | 1.95451 |
| Slc11a1       | 4.26992 | 6E-07   | 0.12504 | 0.22593 | 0.25708 | 2.94438 | 2.25634 | 0.81325 |
| Ptprc         | 4.25704 | 2.5E-10 | 0.68439 | 0.82441 | 0.74374 | 9.90884 | 10.4165 | 3.38144 |
| Syn2          | 4.25308 | 1E-05   | 0.08236 | 0.07937 | 0.09031 | 0.83784 | 1.02989 | 0.45375 |
| Ckap2l        | 4.25143 | 0.00011 | 0.14768 | 0.08895 | 0.22772 | 2.20242 | 1.21984 | 0.98875 |
| Gas2l3        | 4.23619 | 7.1E-05 | 0.05149 | 0.11027 | 0.11762 | 1.23941 | 1.10798 | 0.39399 |
| Fam78a        | 4.23026 | 2.2E-07 | 0.1939  | 0.109   | 0.21262 | 1.82637 | 1.85297 | 0.78635 |
| Ighd          | 4.22434 | 0.0028  | 0.91436 | 0.34266 | 0.54308 | 6.54536 | 10.318  | 2.65862 |
| Scn7a         | 4.21678 | 1.9E-06 | 0.74182 | 2.04066 | 2.30396 | 17.1657 | 20.3859 | 9.0577  |
| Hist1h3d      | 4.2094  | 0.02508 | 0.20682 | 1.16261 | 1.27564 | 12.5972 | 6.72815 | 1.26601 |
| Tlr2          | 4.20671 | 2.5E-06 | 0.23056 | 0.33945 | 0.44769 | 5.21197 | 4.10185 | 0.9409  |
| Grrp1         | 4.19976 | 1.1E-07 | 0.72671 | 1.45896 | 1.43183 | 9.12643 | 12.513  | 10.4259 |
| Paqr3         | 4.1952  | 0.01684 | 0       | 0.06146 | 0.02098 | 0.18263 | 0.49799 | 0.16398 |
| Disp2         | 4.17954 | 5.9E-10 | 0.09697 | 0.37963 | 0.28244 | 3.25765 | 2.15646 | 1.54889 |
| Snai1         | 4.1758  | 1.6E-08 | 0.07145 | 0.74591 | 0.68552 | 6.86435 | 4.61237 | 2.89753 |
| Slamf9        | 4.1755  | 2.6E-06 | 0.26463 | 0.49586 | 0.42316 | 3.48953 | 5.06661 | 2.29482 |
| Ndc1          | 4.1627  | 6.3E-06 | 0       | 0.09444 | 0.19344 | 1.13727 | 1.17169 | 0.52193 |
| 4930578C19Rik | 4.16049 | 0.0042  | 0.0331  | 0.05316 | 0.18148 | 0.78982 | 1.36284 | 0.45589 |
| Ackr2         | 4.15974 | 3.4E-11 | 0.22223 | 0.44616 | 0.91379 | 7.4424  | 5.17736 | 2.664   |
| Egr2          | 4.13663 | 6E-05   | 0.23859 | 0.35583 | 0.21023 | 2.58972 | 3.32646 | 1.51265 |
| Stap1         | 4.13209 | 0.00061 | 0.03727 | 0.05986 | 0.07663 | 0.73721 | 0.72938 | 0.19963 |

|               |         |         |         |         |         |         |         |         |
|---------------|---------|---------|---------|---------|---------|---------|---------|---------|
| Slfn2         | 4.12482 | 0.00361 | 2.71451 | 2.85063 | 1.908   | 19.2305 | 18.1496 | 8.62772 |
| Cdca3         | 4.11069 | 0.02861 | 0.16165 | 0.03245 | 0.08308 | 1.09115 | 1.10923 | 0.30921 |
| Mb21d1        | 4.10593 | 0.00015 | 0.02807 | 0.13525 | 0.07695 | 0.75793 | 0.97025 | 0.53696 |
| Adora2a       | 4.10342 | 2.6E-05 | 0.13712 | 0.18352 | 0.25059 | 1.95161 | 2.36972 | 0.94426 |
| Foxm1         | 4.09825 | 3.3E-05 | 0.08051 | 0.09699 | 0.19312 | 1.71894 | 1.28915 | 0.67767 |
| Postn         | 4.09567 | 2E-09   | 0.62555 | 1.18639 | 1.1584  | 14.9514 | 11.2845 | 3.1061  |
| Trim59        | 4.08973 | 0.00347 | 0.13821 | 0.08324 | 0.14208 | 1.43196 | 1.52799 | 0.44945 |
| Mrc1          | 4.07743 | 2.3E-07 | 0.39994 | 1.27009 | 1.19601 | 13.1046 | 11.2734 | 2.71245 |
| Cenpa         | 4.06999 | 0.00011 | 0.23108 | 0.22269 | 0.09502 | 2.06048 | 1.73842 | 0.91945 |
| Siglec1       | 4.06983 | 1.3E-08 | 0.17836 | 0.37761 | 0.3667  | 4.30676 | 3.28849 | 1.17863 |
| Osm           | 4.06786 | 0.00405 | 0       | 0.04094 | 0.13974 | 0.80024 | 0.6737  | 0.35105 |
| Gm8369        | 4.06628 | 0.03697 | 0.06428 | 0.06883 | 0.02937 | 0.47094 | 0.87136 | 0.14756 |
| Armcx4        | 4.06479 | 2.5E-10 | 0.60835 | 1.23298 | 1.40957 | 6.55773 | 11.6918 | 9.07707 |
| Spc25         | 4.06446 | 0.00044 | 0.07266 | 0.08752 | 0.12449 | 1.2775  | 0.81253 | 0.52817 |
| Rap2b         | 4.06005 | 8.5E-09 | 0.08525 | 0.39706 | 0.43233 | 3.16899 | 3.54459 | 1.63073 |
| Cxcl16        | 4.05732 | 6E-11   | 1.57186 | 2.4322  | 1.91798 | 18.8496 | 18.5325 | 7.8324  |
| Cd300ld       | 4.04312 | 0.00523 | 0.13136 | 0.10549 | 0.24007 | 1.2648  | 2.15899 | 0.53608 |
| Rnf125        | 4.03932 | 0.00386 | 0.08682 | 0.27889 | 0.238   | 3.16201 | 1.80939 | 0.93005 |
| Lyz2          | 4.03885 | 1.4E-05 | 45.1018 | 55.2468 | 63.072  | 809.697 | 662.744 | 197.961 |
| Ccne1         | 4.03845 | 0.02564 | 0.13053 | 0.13976 | 0       | 1.01085 | 0.9952  | 0.26633 |
| Lamb3         | 4.03245 | 7.5E-11 | 0.37733 | 0.70703 | 0.71831 | 7.59512 | 7.08587 | 2.32579 |
| Clec4d        | 4.02754 | 0.02556 | 0.14486 | 0.05817 | 0.14892 | 1.63736 | 1.03089 | 0.4988  |
| Litaf         | 4.0275  | 5.4E-10 | 0.92059 | 2.04182 | 1.44205 | 20.1222 | 15.9991 | 5.46751 |
| Il7r          | 4.01488 | 6.8E-07 | 0.50545 | 0.37691 | 0.56907 | 6.50637 | 5.57883 | 1.82324 |
| Fam198b       | 4.00979 | 3.5E-06 | 0.13081 | 0.39394 | 0.44824 | 3.48076 | 3.87322 | 1.55145 |
| Cenpl         | 4.00791 | 0.00311 | 0.04461 | 0.10748 | 0       | 0.53228 | 0.46489 | 0.2731  |
| Cd28          | 4.00306 | 0.00516 | 0.09459 | 0.07596 | 0.02593 | 0.76029 | 0.74046 | 0.21714 |
| Aoah          | 3.9979  | 0.00459 | 0.19866 | 0.12763 | 0.08169 | 1.59673 | 1.5349  | 0.45602 |
| Kctd12        | 3.99547 | 1.2E-06 | 1.30026 | 2.3494  | 1.97875 | 12.139  | 13.3061 | 5.15015 |
| Cd48          | 3.99438 | 0.00014 | 0.48704 | 0.70402 | 0.46729 | 6.36125 | 7.0804  | 1.71427 |
| P2ry10        | 3.99039 | 0.00156 | 0.11652 | 0.34309 | 0.13309 | 2.53639 | 2.25061 | 0.74296 |
| Scd1          | 3.97474 | 1.9E-06 | 5.5802  | 12.9627 | 16.019  | 158.16  | 103.232 | 49.0748 |
| Tnfrsf12a     | 3.96539 | 8.2E-06 | 0.72161 | 1.93164 | 0.65938 | 16.9166 | 9.35339 | 3.9571  |
| B430306N03Rik | 3.95455 | 0.00273 | 0.06678 | 0.05363 | 0.03433 | 0.41935 | 0.63649 | 0.28105 |
| Prc1          | 3.9529  | 0.00133 | 0.18306 | 0.12439 | 0.193   | 1.73305 | 1.34563 | 0.5495  |
| Fam124b       | 3.95201 | 0.04795 | 0.1035  | 0       | 0.09458 | 0.36829 | 0.87684 | 0.44878 |
| Cilp          | 3.94692 | 0.00359 | 0.10896 | 0.19687 | 0.41068 | 3.79709 | 2.68604 | 0.43768 |
| Foxf1         | 3.94444 | 0.00141 | 3.11729 | 5.69991 | 5.75166 | 22.8267 | 15.6746 | 8.8804  |
| Tpx2          | 3.94366 | 1E-06   | 0.09905 | 0.23864 | 0.22062 | 2.17697 | 1.74965 | 1.0232  |
| Slit2         | 3.93171 | 1.7E-17 | 0.18543 | 0.52649 | 0.63084 | 4.79879 | 4.81702 | 2.1485  |
| Pbk           | 3.92769 | 0.03248 | 0       | 0.05193 | 0.26591 | 1.66487 | 0.98612 | 0.44533 |
| Ifi209        | 3.92477 | 5.7E-05 | 0.29387 | 0.49821 | 0.26853 | 4.79784 | 4.36514 | 1.42413 |
| Neb           | 3.91153 | 7.5E-06 | 0.03486 | 0.03149 | 0.02389 | 0.27086 | 0.33885 | 0.15669 |
| Ncapg         | 3.90843 | 0.00015 | 0.01639 | 0.14479 | 0.0674  | 0.85427 | 0.77484 | 0.3888  |
| Fabp5         | 3.90049 | 0.00094 | 0.58445 | 0.28682 | 0.31153 | 6.17775 | 3.68049 | 1.04347 |
| 1110038B12Rik | 3.89886 | 2E-05   | 0.06395 | 0.20543 | 0.39445 | 2.52996 | 2.50309 | 1.02763 |
| Ddah1         | 3.88723 | 1E-08   | 0.26171 | 0.30357 | 0.39856 | 3.30491 | 3.62126 | 1.53523 |
| Cish          | 3.88546 | 7.1E-07 | 0.27065 | 0.40571 | 0.54407 | 3.18368 | 3.20082 | 1.60149 |
| Zfp984        | 3.87982 | 0.01709 | 0.15909 | 0.19164 | 0.08177 | 2.57239 | 2.18341 | 0.36519 |
| Plcl2         | 3.87624 | 1.3E-10 | 0.20018 | 0.29855 | 0.41156 | 3.41185 | 3.1398  | 1.44419 |
| Selplg        | 3.86395 | 2.8E-05 | 1.16821 | 0.71476 | 0.87684 | 14.0772 | 10.0664 | 2.89443 |
| Fxyd5         | 3.85691 | 2.8E-09 | 0.46969 | 0.84311 | 0.79524 | 9.83678 | 6.89547 | 2.47343 |
| Gm14636       | 3.85277 | 0.00144 | 0.0661  | 0.09289 | 0.07927 | 0.78859 | 0.99953 | 0.30345 |
| Itgb2         | 3.85117 | 2.5E-08 | 1.66974 | 1.88943 | 1.92451 | 23.6384 | 21.1026 | 7.31729 |
| Cldn18        | 3.84002 | 6.8E-06 | 0.98769 | 3.67359 | 5.25472 | 35.6776 | 34.1522 | 11.0975 |
| Lyve1         | 3.83936 | 0.00207 | 0.91259 | 2.99514 | 3.3446  | 39.5397 | 18.8977 | 5.95054 |

|               |         |         |         |         |         |         |         |         |
|---------------|---------|---------|---------|---------|---------|---------|---------|---------|
| Pdpr          | 3.83559 | 3.4E-07 | 1.01987 | 3.37841 | 2.27154 | 29.0985 | 24.851  | 5.85276 |
| Vgll3         | 3.83264 | 5.2E-05 | 0.24405 | 0.61595 | 0.3584  | 5.91092 | 3.77471 | 1.28049 |
| Sell          | 3.82466 | 5.6E-06 | 0.27431 | 0.25176 | 0.16114 | 2.55914 | 2.79865 | 0.77961 |
| C330027C09Rik | 3.82428 | 0.00115 | 0.06109 | 0.08176 | 0.06977 | 0.76715 | 0.67276 | 0.35835 |
| Emcn          | 3.8183  | 2.1E-06 | 0.06424 | 0.25793 | 0.20544 | 1.72101 | 2.19856 | 0.67174 |
| Kcnb2         | 3.81498 | 0.02483 | 0       | 0.01227 | 0.01047 | 0.06234 | 0.08929 | 0.05259 |
| Arg2          | 3.80787 | 0.01579 | 0       | 0.32566 | 0.16675 | 2.85201 | 1.15434 | 0.49647 |
| Il2ra         | 3.80131 | 0.00099 | 0.02223 | 0.07142 | 0.1219  | 0.79581 | 0.98326 | 0.17013 |
| Cdc20         | 3.79819 | 0.00242 | 0.124   | 0.34853 | 0.21245 | 2.76422 | 1.73336 | 1.3758  |
| 2410006H16Rik | 3.7944  | 4E-05   | 0.25069 | 1.40922 | 1.54623 | 13.5378 | 11.0862 | 3.83639 |
| Il2rg         | 3.7901  | 0.00013 | 0.63077 | 0.58447 | 1.03082 | 10.7246 | 8.01558 | 2.45034 |
| C5ar1         | 3.7894  | 3.3E-08 | 0.1352  | 0.7238  | 0.43238 | 5.26345 | 4.14619 | 1.72414 |
| 1200007C13Rik | 3.78492 | 0.00883 | 0       | 0.07577 | 0.09699 | 0.5036  | 0.71941 | 0.32488 |
| Slc15a3       | 3.78152 | 2E-08   | 0.31639 | 0.28795 | 0.33247 | 3.60254 | 3.14138 | 1.61392 |
| Rgs1          | 3.77277 | 0.00455 | 0.06307 | 0.05065 | 0.12967 | 1.14852 | 0.56638 | 0.41825 |
| Mdga1         | 3.76063 | 0.00046 | 0.01233 | 0.0495  | 0.07604 | 0.4722  | 0.5013  | 0.22639 |
| Srgn          | 3.75953 | 7E-07   | 0.42193 | 1.14355 | 1.33734 | 12.8496 | 9.11487 | 3.38986 |
| Tubb2b        | 3.75459 | 0.00075 | 0.06026 | 0.67748 | 0.20649 | 5.67582 | 2.17475 | 1.15271 |
| Pdgfrb        | 3.75452 | 1.3E-12 | 0.69771 | 2.52981 | 2.14443 | 18.7325 | 18.2482 | 7.55491 |
| Ripk3         | 3.7498  | 3E-05   | 0.11794 | 0.3315  | 0.32331 | 2.77722 | 2.66779 | 1.12806 |
| Slfn9         | 3.74945 | 0.00087 | 0.09708 | 0.15592 | 0.33266 | 1.96294 | 2.01337 | 0.63884 |
| Prrx2         | 3.74152 | 0.00399 | 0       | 0.14229 | 0.12143 | 0.85298 | 0.87061 | 0.58749 |
| Ace           | 3.74105 | 1.4E-08 | 3.26406 | 10.5024 | 12.1454 | 88.1876 | 65.0847 | 25.2771 |
| Fcrls         | 3.7368  | 3.2E-08 | 0.04962 | 0.47819 | 0.88419 | 5.39059 | 5.01945 | 1.93644 |
| Fstl1         | 3.73615 | 1.7E-11 | 1.74412 | 5.22393 | 4.49037 | 37.9911 | 39.2595 | 13.0027 |
| Cxcl15        | 3.72767 | 0.00084 | 4.90067 | 2.92975 | 6.04533 | 68.8283 | 46.859  | 19.999  |
| Cd276         | 3.72422 | 5E-06   | 0.2533  | 0.33054 | 0.15189 | 2.20684 | 2.71986 | 1.11442 |
| Hpgds         | 3.72383 | 0.00044 | 0.16149 | 0.18156 | 0.08854 | 1.31824 | 1.55961 | 0.5684  |
| Mybl1         | 3.71844 | 0.00061 | 0.02144 | 0.05165 | 0.08816 | 0.49812 | 0.51221 | 0.37732 |
| Serpinb9      | 3.71825 | 3.8E-06 | 0.56352 | 0.66549 | 1.24943 | 9.61635 | 10.1433 | 2.46027 |
| Cd72          | 3.70257 | 0.01286 | 0.23692 | 0.10872 | 0.34792 | 2.78408 | 3.30313 | 1.45025 |
| Mfap5         | 3.69497 | 2.8E-05 | 0.25816 | 0.85519 | 0.50866 | 7.1328  | 5.28185 | 1.55561 |
| Serping1      | 3.69207 | 0.00072 | 1.44463 | 4.96046 | 4.33564 | 56.7108 | 29.423  | 6.93718 |
| Col8a1        | 3.68874 | 6.5E-06 | 0.06802 | 0.32775 | 0.24862 | 2.47736 | 2.43184 | 0.60723 |
| Tbx21         | 3.68829 | 0.01655 | 0       | 0.03738 | 0.12761 | 0.55539 | 0.54423 | 0.39181 |
| Cyp4f18       | 3.68601 | 9E-06   | 0.6868  | 0.95265 | 0.47068 | 5.13592 | 5.04611 | 2.53202 |
| D8Ert82e      | 3.68173 | 1.4E-06 | 0.07234 | 0.10651 | 0.10742 | 0.93122 | 1.10928 | 0.34135 |
| Sash3         | 3.68094 | 9.4E-06 | 0.56244 | 0.27795 | 0.50405 | 4.5369  | 5.10204 | 1.78764 |
| Rac2          | 3.6801  | 9.5E-05 | 0.80112 | 0.49016 | 0.52288 | 8.00084 | 7.00018 | 1.86815 |
| Ccbe1         | 3.66941 | 2E-11   | 0.1096  | 0.19558 | 0.23367 | 1.57519 | 1.81981 | 0.87586 |
| Nckap1l       | 3.66795 | 3.4E-11 | 1.17857 | 1.34081 | 1.21154 | 13.0281 | 14.3902 | 5.33565 |
| Ccna2         | 3.66459 | 0.00031 | 0.14183 | 0.15946 | 0.15552 | 2.42243 | 1.98977 | 0.71626 |
| Glrx          | 3.66054 | 3.4E-05 | 0.60278 | 0.55321 | 0.70816 | 7.67816 | 5.90902 | 2.10844 |
| Hist4h4       | 3.65484 | 0.00584 | 0.04045 | 0.16243 | 0.33268 | 1.52413 | 1.52165 | 0.37144 |
| Abcg2         | 3.64447 | 9.9E-07 | 0.07103 | 0.12549 | 0.10709 | 0.96338 | 1.01091 | 0.47827 |
| Diaph3        | 3.64361 | 5.2E-06 | 0.17686 | 0.14203 | 0.25973 | 2.01488 | 1.68241 | 1.10196 |
| March1        | 3.64287 | 3.3E-07 | 0.34036 | 0.31237 | 0.27768 | 2.5443  | 2.57037 | 1.09133 |
| Rab8b         | 3.6378  | 7.2E-07 | 0.75859 | 0.9236  | 1.14037 | 11.6319 | 10.0503 | 3.35159 |
| Smc2          | 3.63393 | 2.7E-08 | 0.16914 | 0.25468 | 0.37672 | 3.11987 | 2.62224 | 1.00301 |
| Fgf2          | 3.63352 | 0.0151  | 0.31065 | 0.73453 | 0.93436 | 6.95727 | 6.21961 | 2.23169 |
| Adgre1        | 3.63293 | 2.1E-05 | 0.49968 | 0.80254 | 0.80718 | 8.89748 | 7.45643 | 2.04824 |
| Hist1h3c      | 3.63128 | 0.02241 | 0.4737  | 2.47262 | 4.22024 | 19.7803 | 12.8819 | 9.24264 |
| Kmo           | 3.63094 | 0.00017 | 0.09807 | 0.19689 | 0.21843 | 1.97057 | 1.59516 | 0.71287 |
| Kctd12b       | 3.62455 | 0.00593 | 0.09443 | 0.07583 | 0.12943 | 0.87461 | 1.35598 | 0.28902 |
| Col5a2        | 3.61943 | 8.3E-11 | 1.61816 | 4.33478 | 3.79031 | 31.5443 | 31.5319 | 14.8302 |
| Cdkn1a        | 3.61572 | 4.2E-11 | 1.92771 | 4.85335 | 7.71235 | 53.784  | 37.4467 | 23.4009 |



|           |         |         |         |         |         |         |         |         |
|-----------|---------|---------|---------|---------|---------|---------|---------|---------|
| Cdh23     | 3.6153  | 0.01335 | 0.02051 | 0       | 0.02811 | 0.1288  | 0.1842  | 0.07848 |
| Tcf19     | 3.61359 | 0.00051 | 0.12999 | 0.31316 | 0.26725 | 2.16301 | 2.31257 | 1.24327 |
| Klrk1     | 3.61059 | 0.02317 | 0.10729 | 0.08616 | 0.09191 | 1.14529 | 0.92711 | 0.30785 |
| Cdc7      | 3.60932 | 3.2E-05 | 0       | 0.22531 | 0.07691 | 0.7928  | 1.06961 | 0.55817 |
| Tnfrsf13c | 3.60853 | 0.01743 | 0.05742 | 0.23056 | 0.19676 | 1.62255 | 1.78044 | 0.61512 |
| Ccr7      | 3.60455 | 0.001   | 0.40988 | 0.79937 | 0.2809  | 5.91958 | 4.73233 | 1.74732 |
| Alox5ap   | 3.60382 | 2E-05   | 0.40781 | 2.03047 | 1.39741 | 12.9576 | 10.6549 | 3.37008 |
| Lockd     | 3.60373 | 0.01945 | 0       | 0.01607 | 0.06857 | 0.31413 | 0.2136  | 0.22967 |
| Itgb6     | 3.60216 | 6E-12   | 0.43976 | 0.6409  | 0.74785 | 5.8091  | 6.63969 | 2.69189 |
| Slco2a1   | 3.59659 | 1E-13   | 1.36482 | 3.18923 | 3.90233 | 27.6209 | 27.2492 | 12.4803 |
| Slc7a8    | 3.5963  | 0.00083 | 0.05744 | 0.1845  | 0.13777 | 1.58689 | 1.25538 | 0.32961 |
| Podxl     | 3.59425 | 1E-09   | 1.85716 | 4.3047  | 4.57031 | 39.3713 | 33.2224 | 14.6786 |
| Adat2     | 3.59326 | 0.04228 | 0       | 0.12689 | 0.10829 | 0.5953  | 0.80316 | 0.60451 |
| Sparcl1   | 3.59034 | 1E-06   | 5.56027 | 17.5124 | 14.5936 | 170.735 | 116.34  | 30.7773 |
| Kit       | 3.58895 | 1.2E-07 | 0.58979 | 1.09526 | 1.37677 | 7.41845 | 10.4083 | 6.06411 |
| Ubash3b   | 3.58782 | 5.4E-09 | 0.15809 | 0.17774 | 0.23836 | 1.74718 | 1.84827 | 0.91935 |
| Stab2     | 3.58726 | 0.01481 | 0.02846 | 0.0457  | 0.04875 | 0.2591  | 0.36162 | 0.23952 |
| Thy1      | 3.58697 | 3.4E-07 | 0.10774 | 0.47586 | 0.77527 | 5.27688 | 4.29898 | 1.81363 |
| Wnt2      | 3.58584 | 0.0037  | 0.05136 | 0.20623 | 0.17599 | 1.3868  | 1.38367 | 0.74669 |
| Ctsb      | 3.58399 | 3E-08   | 2.90831 | 7.10469 | 7.28576 | 75.1049 | 55.5545 | 15.6895 |
| Enpp1     | 3.58392 | 1.5E-07 | 0.02258 | 0.13602 | 0.11608 | 0.92884 | 0.93556 | 0.38016 |
| Pcdh17    | 3.58017 | 2E-06   | 0.29232 | 0.43037 | 0.47579 | 2.0803  | 4.82288 | 2.50699 |
| Lpxn      | 3.57937 | 0.00575 | 0.55317 | 0.16658 | 0.23693 | 2.90905 | 3.16324 | 1.42851 |
| H2-DMb2   | 3.57892 | 0.00242 | 1.15142 | 0.97904 | 0.2785  | 9.35659 | 8.29707 | 3.73139 |
| Eif5a2    | 3.56768 | 7.6E-05 | 0.06912 | 0.22202 | 0.17368 | 1.46118 | 1.60441 | 0.6699  |
| H2-DMa    | 3.56513 | 3.4E-06 | 0.77636 | 1.19024 | 2.07985 | 15.0239 | 13.2739 | 5.23839 |
| Dhfr      | 3.56335 | 0.00182 | 0.04379 | 0.07033 | 0.09003 | 0.59116 | 0.66773 | 0.36855 |
| S100a10   | 3.55951 | 0.0003  | 1.14672 | 2.68589 | 1.70272 | 23.882  | 20.0124 | 3.72908 |
| Vcan      | 3.55112 | 2.4E-09 | 0.15216 | 0.34729 | 0.41712 | 3.81182 | 2.6175  | 1.06624 |
| Col4a1    | 3.54203 | 1.9E-13 | 5.4564  | 14.2575 | 15.9867 | 146.06  | 121.051 | 51.0963 |
| Il10ra    | 3.52897 | 9.5E-10 | 0.62909 | 1.03697 | 0.9984  | 7.65102 | 8.56647 | 4.73758 |
| Nid1      | 3.52579 | 1.5E-09 | 0.86203 | 3.81511 | 3.29517 | 29.2781 | 23.1454 | 8.50148 |
| Syt12     | 3.52483 | 0.01276 | 0.04182 | 0.10075 | 0.15763 | 0.76153 | 0.77588 | 0.41598 |
| Ifi30     | 3.52074 | 1.2E-10 | 3.66367 | 5.78931 | 4.94056 | 60.2589 | 42.051  | 17.4528 |
| Arhgdib   | 3.51288 | 0.00015 | 1.62839 | 1.47114 | 1.11596 | 15.8489 | 10.9672 | 2.80346 |
| Xcr1      | 3.51172 | 0.00741 | 0       | 0.06266 | 0.10695 | 0.55529 | 0.52882 | 0.19901 |
| Tgfb1     | 3.50925 | 6.6E-12 | 1.02081 | 1.98109 | 1.4866  | 17.1199 | 14.2476 | 5.23978 |
| Ptpro     | 3.50161 | 0.00873 | 0.03445 | 0.08301 | 0.03542 | 0.31371 | 0.648   | 0.19773 |
| Ctgf      | 3.49904 | 0.0005  | 4.08869 | 15.4093 | 8.10098 | 96.443  | 60.25   | 24.5015 |
| Pxdn      | 3.49864 | 1.1E-07 | 0.41377 | 0.94797 | 1.1009  | 9.72791 | 7.87467 | 2.46763 |
| Gapdh     | 3.49732 | 0.00114 | 0.22577 | 1.1966  | 0.8355  | 11.5681 | 5.7609  | 1.69295 |
| Rnase6    | 3.49698 | 0.04407 | 0.21608 | 0.08676 | 0.37021 | 2.4423  | 2.41636 | 0.57868 |
| Slc39a14  | 3.49625 | 1.6E-13 | 0.41717 | 0.55541 | 0.65454 | 5.86635 | 4.58136 | 2.62082 |
| Klhl6     | 3.49134 | 8.8E-08 | 0.44443 | 0.67811 | 0.45687 | 4.82795 | 5.19586 | 2.21041 |
| Serpina3g | 3.49095 | 0.00263 | 1.48557 | 0.39766 | 0.71643 | 10.2266 | 8.19444 | 3.1996  |
| Gimap3    | 3.48157 | 2.7E-07 | 0.67415 | 0.8662  | 0.89322 | 5.19271 | 7.47029 | 3.26696 |
| Slc16a6   | 3.4773  | 0.00021 | 0.11859 | 0.20952 | 0.09753 | 1.53406 | 1.53116 | 0.8167  |
| Timp3     | 3.45762 | 0.00114 | 2.04788 | 10.7353 | 10.1263 | 63.4211 | 41.4355 | 14.9515 |
| Aff2      | 3.45553 | 0.00197 | 0.03188 | 0.07679 | 0.08738 | 0.60046 | 0.43746 | 0.28048 |
| Pdgfc     | 3.45099 | 3.4E-05 | 0.11379 | 0.12793 | 0.18716 | 1.18614 | 1.43448 | 0.69657 |
| Slc35f6   | 3.44857 | 2.1E-07 | 0.09426 | 0.65606 | 0.55987 | 4.025   | 4.26442 | 1.82723 |
| Cst3      | 3.44338 | 0.00017 | 3.11047 | 11.4608 | 11.9122 | 120.578 | 72.4964 | 17.0801 |
| Lrrc25    | 3.44133 | 0.00418 | 0.32039 | 0.25729 | 0.21957 | 2.66562 | 2.23923 | 0.98059 |
| Tmem173   | 3.43558 | 2.9E-07 | 0.15094 | 0.76766 | 1.31024 | 8.68797 | 6.24005 | 2.7333  |
| Grn       | 3.43231 | 5.5E-09 | 1.6336  | 3.6411  | 3.99835 | 39.2311 | 26.3176 | 9.10695 |
| Zfp995    | 3.43153 | 0.02047 | 0       | 0.02937 | 0.10025 | 0.43631 | 0.44614 | 0.33579 |

|               |         |         |         |         |         |         |         |         |
|---------------|---------|---------|---------|---------|---------|---------|---------|---------|
| Tyrobp        | 3.42899 | 2.1E-08 | 3.12556 | 4.1833  | 4.641   | 44.7043 | 36.3643 | 14.6151 |
| Il2rb         | 3.42665 | 0.00128 | 0.37428 | 0.23377 | 0.342   | 3.55144 | 2.83259 | 1.20919 |
| Figl1         | 3.41706 | 0.03234 | 0.04787 | 0.03844 | 0.08201 | 0.39076 | 0.62047 | 0.27471 |
| Fbn2          | 3.41101 | 0.00715 | 0.0221  | 0.04437 | 0.05302 | 0.36086 | 0.43816 | 0.1353  |
| Ifit2         | 3.40217 | 1.2E-06 | 0.11797 | 0.56843 | 0.76806 | 4.75952 | 4.51242 | 1.89563 |
| Bora          | 3.40215 | 0.00462 | 0       | 0.06959 | 0.23755 | 0.68019 | 1.14527 | 0.62993 |
| S1pr1         | 3.39857 | 7.2E-06 | 1.06465 | 3.35881 | 3.51784 | 38.703  | 16.9308 | 6.83711 |
| Fzd1          | 3.38976 | 8.2E-14 | 0.80028 | 2.06095 | 1.83445 | 15.8206 | 14.6863 | 5.76445 |
| Atad5         | 3.38849 | 1.8E-06 | 0.03075 | 0.09879 | 0.16861 | 0.84004 | 0.9692  | 0.50593 |
| Capza1        | 3.38585 | 3.3E-06 | 1.04148 | 2.09091 | 1.65841 | 15.0415 | 12.7209 | 4.07828 |
| Ccnb2         | 3.37869 | 0.01955 | 0.22695 | 0.18225 | 0.25922 | 2.28012 | 1.92264 | 0.86826 |
| Fjx1          | 3.37669 | 8.7E-05 | 0.03696 | 0.29677 | 0.45588 | 1.22989 | 2.57351 | 1.89457 |
| Csf1r         | 3.37238 | 5E-12   | 0.94837 | 2.74171 | 2.45349 | 21.2298 | 19.9693 | 6.24063 |
| Heph          | 3.37114 | 3E-05   | 0.03023 | 0.10925 | 0.12431 | 0.86375 | 0.88361 | 0.30072 |
| Vsir          | 3.36948 | 2.9E-06 | 2.58711 | 3.39461 | 3.75177 | 10.8495 | 12.7512 | 9.98616 |
| Angptl2       | 3.36753 | 0.00048 | 0.31322 | 0.97655 | 0.78287 | 5.0559  | 4.09271 | 1.4803  |
| Tnfsf10       | 3.3668  | 9.7E-05 | 0.48386 | 0.52986 | 0.81393 | 4.08792 | 7.40084 | 2.77676 |
| Rrm1          | 3.36322 | 3.4E-09 | 0.16124 | 0.53645 | 0.50516 | 4.13677 | 3.73507 | 1.39241 |
| Dusp6         | 3.36181 | 4.4E-09 | 1.44981 | 2.92731 | 2.6117  | 27.2333 | 19.4553 | 8.17743 |
| Chsy3         | 3.35678 | 6.3E-05 | 0.15806 | 0.38079 | 0.1354  | 2.05946 | 1.84789 | 0.99778 |
| Loxl2         | 3.35644 | 1.5E-07 | 0.57856 | 1.66917 | 1.49788 | 11.2083 | 9.47605 | 3.26281 |
| Gla           | 3.35378 | 5.2E-05 | 0.21284 | 0.28487 | 0.2431  | 2.40565 | 2.30797 | 0.84142 |
| Rpl39         | 3.34843 | 0.00056 | 2.423   | 1.88093 | 2.71219 | 31.2408 | 27.7935 | 7.10695 |
| Vcam1         | 3.34279 | 4.4E-07 | 0.27236 | 0.60147 | 0.7466  | 6.08546 | 4.83384 | 1.82347 |
| Arhgap15      | 3.33354 | 7.8E-08 | 0.23642 | 0.27424 | 0.29704 | 2.28455 | 2.70389 | 1.03515 |
| Cd34          | 3.32855 | 4.3E-08 | 1.24781 | 2.55068 | 2.92304 | 16.212  | 15.5107 | 6.68343 |
| Cd69          | 3.31458 | 0.02229 | 0.05844 | 0.18771 | 0.16019 | 1.39435 | 1.18812 | 0.49184 |
| Ptptr         | 3.30942 | 0.00126 | 0.01837 | 0.059   | 0.06294 | 0.41522 | 0.36879 | 0.25298 |
| Hcn1          | 3.30643 | 1.9E-05 | 0.00639 | 0.06673 | 0.03942 | 0.32911 | 0.3119  | 0.19074 |
| Tmem97        | 3.30571 | 0.00669 | 0.08423 | 0.4735  | 0.34635 | 4.07267 | 2.39767 | 0.83787 |
| Ifi204        | 3.3054  | 0.0082  | 0.19515 | 0.54849 | 0.31205 | 3.39021 | 2.0004  | 1.14478 |
| Itk           | 3.30391 | 5E-05   | 0.12979 | 0.20846 | 0.1779  | 1.75228 | 1.62737 | 0.59588 |
| Ccnf          | 3.29974 | 0.00281 | 0.07475 | 0.12005 | 0.2049  | 1.43153 | 0.96884 | 0.62912 |
| Mmp3          | 3.29528 | 0.00406 | 0.25723 | 0.723   | 0.66107 | 7.67239 | 3.79182 | 1.03333 |
| Fam105a       | 3.29271 | 7.9E-05 | 0.61388 | 0.36152 | 0.36461 | 3.88045 | 4.49336 | 1.65968 |
| Csf2rb2       | 3.28976 | 0.00013 | 0.77849 | 0.50417 | 0.44746 | 5.39297 | 5.14422 | 2.53641 |
| Plek          | 3.28576 | 4.1E-10 | 0.67127 | 1.05739 | 1.00853 | 8.90029 | 8.84514 | 3.18054 |
| Itga2         | 3.28528 | 0.00017 | 0.27484 | 0.1545  | 0.35788 | 2.7268  | 2.33306 | 0.96738 |
| P2ry6         | 3.27988 | 0.0006  | 0.52995 | 0.50296 | 0.52827 | 6.35296 | 4.92227 | 1.14278 |
| Olfm1         | 3.27972 | 6.6E-09 | 0.29338 | 1.07328 | 0.82657 | 6.95945 | 6.61122 | 2.66884 |
| Ighm          | 3.27916 | 0.03013 | 1.78089 | 2.95892 | 1.85176 | 23.0981 | 25.7211 | 5.30972 |
| Nfam1         | 3.27278 | 9E-05   | 0.61109 | 0.66394 | 0.5666  | 6.72639 | 5.70076 | 2.00785 |
| Cyp7b1        | 3.26925 | 8.9E-05 | 0.26736 | 0.38646 | 0.36645 | 3.59266 | 2.71797 | 1.18652 |
| Asah1         | 3.26917 | 1.6E-05 | 0.81996 | 1.39924 | 1.47507 | 14.0733 | 12.2084 | 2.92788 |
| Cacna1e       | 3.26635 | 0.00023 | 0.01984 | 0.04779 | 0.04079 | 0.32076 | 0.30251 | 0.16697 |
| Tspan8        | 3.26258 | 3.2E-06 | 0.98926 | 1.9555  | 1.25161 | 14.0483 | 12.9579 | 4.59988 |
| Ptger4        | 3.25562 | 1.5E-07 | 0.17422 | 0.33577 | 0.35818 | 2.22073 | 2.63008 | 1.06643 |
| Chil3         | 3.2492  | 0.03705 | 2.27096 | 0.96884 | 2.62631 | 25.1333 | 23.5557 | 3.96403 |
| Pi15          | 3.24468 | 0.01818 | 0.06692 | 0.36274 | 0.34395 | 4.4016  | 2.84875 | 0.89606 |
| Il4ra         | 3.23979 | 2.2E-17 | 1.71741 | 3.42468 | 3.43835 | 24.2703 | 22.6383 | 14.0121 |
| Rpl29         | 3.23898 | 0.00132 | 1.85146 | 2.72583 | 2.3967  | 30.6148 | 15.4237 | 3.30556 |
| Vangl2        | 3.23643 | 9.1E-05 | 0.04971 | 0.07984 | 0.19304 | 0.56183 | 1.07804 | 0.67194 |
| Serpine2      | 3.23539 | 1.7E-09 | 0.91266 | 4.16104 | 3.79312 | 26.3434 | 26.2182 | 9.95686 |
| F830016B08Rik | 3.23495 | 0.00727 | 0.42154 | 0.39494 | 0.36111 | 2.9117  | 3.19623 | 2.12345 |
| Esco2         | 3.23446 | 0.04787 | 0.02888 | 0.02319 | 0.09897 | 0.43527 | 0.44043 | 0.2652  |
| Napsa         | 3.23019 | 8E-05   | 1.6981  | 2.48256 | 3.5509  | 25.6182 | 17.6835 | 7.72931 |

|               |         |         |         |         |         |         |         |         |
|---------------|---------|---------|---------|---------|---------|---------|---------|---------|
| Enc1          | 3.22407 | 9E-08   | 0.46406 | 0.5688  | 0.87039 | 6.57941 | 5.57428 | 2.22392 |
| Stk26         | 3.22345 | 0.01376 | 0.06592 | 0.01765 | 0.12047 | 0.48291 | 0.73715 | 0.26901 |
| Sema6b        | 3.2147  | 6.8E-07 | 0.37859 | 0.74837 | 1.03782 | 4.93741 | 5.43268 | 4.47894 |
| Rad51         | 3.21356 | 0.02524 | 0.05226 | 0.01399 | 0.05969 | 0.37189 | 0.27448 | 0.1866  |
| Ntrk2         | 3.20425 | 9.7E-06 | 0.09228 | 0.18189 | 0.17247 | 1.338   | 1.45409 | 0.50068 |
| Col4a2        | 3.2033  | 3.8E-14 | 5.28439 | 13.2368 | 15.3134 | 108.249 | 89.9213 | 40.9832 |
| Hist1h1a      | 3.20075 | 0.02522 | 1.44323 | 0.57949 | 0.61817 | 9.06246 | 7.51939 | 2.62273 |
| Tbxas1        | 3.20012 | 5.7E-07 | 0.12736 | 0.2966  | 0.2182  | 1.64742 | 1.72846 | 0.82832 |
| Cyr61         | 3.20001 | 0.00011 | 3.26978 | 8.10774 | 4.08855 | 49.3487 | 39.6558 | 22.8684 |
| Hist1h4i      | 3.19733 | 0.0265  | 0       | 0.12793 | 0.65507 | 3.10112 | 2.83425 | 1.82848 |
| Emp1          | 3.19601 | 0.00012 | 1.03042 | 4.63388 | 6.5438  | 44.6235 | 30.4134 | 10.4074 |
| Abcb1a        | 3.19241 | 0.00033 | 0.14794 | 0.28853 | 0.34762 | 2.57461 | 2.07339 | 0.64687 |
| Abca1         | 3.19158 | 4.5E-10 | 0.69293 | 2.52199 | 2.63479 | 14.9832 | 17.7188 | 7.41426 |
| Tnfrsf1b      | 3.1914  | 2.1E-08 | 1.00106 | 1.94885 | 1.24735 | 13.2195 | 13.3224 | 4.71188 |
| Mki67         | 3.19125 | 6E-06   | 0.73675 | 0.75805 | 0.89148 | 8.68869 | 6.6882  | 3.36478 |
| Ctsc          | 3.19073 | 4.6E-07 | 1.43578 | 1.76153 | 2.51457 | 20.4981 | 18.225  | 5.78292 |
| Malt1         | 3.18963 | 2.2E-07 | 0.5251  | 0.53169 | 0.71972 | 4.88856 | 5.70958 | 2.48061 |
| Nos2          | 3.1896  | 0.00743 | 0.13125 | 0.06324 | 0.21588 | 0.93957 | 1.50781 | 0.54233 |
| Acer2         | 3.18717 | 3.1E-06 | 0.79273 | 2.65034 | 3.23745 | 18.4584 | 16.9978 | 9.55651 |
| Mirt1         | 3.18609 | 0.00071 | 0.05347 | 0.12882 | 0.03664 | 0.47846 | 0.70667 | 0.30686 |
| Nrep          | 3.18453 | 1.1E-09 | 1.24438 | 3.0349  | 3.50593 | 15.6565 | 22.5131 | 14.4586 |
| Amigo2        | 3.17609 | 5.6E-06 | 0.20171 | 0.61552 | 0.69116 | 3.06509 | 3.54745 | 3.24109 |
| Dpp4          | 3.17291 | 9.1E-06 | 0.16496 | 0.45629 | 0.40195 | 3.36067 | 3.06515 | 0.96769 |
| Cd80          | 3.17041 | 0.00877 | 0.13618 | 0.38275 | 0.13999 | 1.75295 | 1.62666 | 1.14618 |
| Hist1h1b      | 3.16171 | 0.01755 | 1.40292 | 0.75108 | 1.06828 | 12.9204 | 9.27045 | 2.62403 |
| Cox7b         | 3.15936 | 0.04602 | 0.38161 | 0.91936 | 0.98072 | 10.0043 | 6.64363 | 1.02198 |
| Ccl22         | 3.15646 | 0.00015 | 0.3487  | 0.32003 | 0.78519 | 5.06738 | 3.57026 | 1.98205 |
| Zfp429        | 3.15645 | 0.00353 | 0.10855 | 0.26151 | 0.26036 | 1.90847 | 1.48972 | 0.70597 |
| E2f1          | 3.15196 | 7E-05   | 0.14689 | 0.20642 | 0.30199 | 1.89079 | 1.64257 | 1.09582 |
| Lat2          | 3.1512  | 0.00091 | 0.75121 | 0.35486 | 0.42397 | 3.80141 | 5.25597 | 3.07687 |
| Gpr132        | 3.14528 | 0.00116 | 0.23743 | 0.41947 | 0.35798 | 3.10108 | 3.0896  | 1.09004 |
| Pcdh12        | 3.14418 | 0.00051 | 0.08245 | 0.26484 | 0.19776 | 1.29429 | 1.72874 | 0.77281 |
| Ncapg2        | 3.14275 | 3.4E-06 | 0.15784 | 0.23942 | 0.24038 | 1.89414 | 1.80964 | 0.81857 |
| Kif4          | 3.13245 | 0.00028 | 0.08402 | 0.11807 | 0.20153 | 0.97601 | 0.98226 | 0.59466 |
| Cyyr1         | 3.13102 | 8.5E-07 | 0.84644 | 1.4013  | 1.6153  | 12.936  | 10.743  | 4.64326 |
| Ttyh2         | 3.13024 | 6.4E-07 | 0.21683 | 0.52238 | 0.46702 | 3.83179 | 3.29075 | 1.4458  |
| Cxcl12        | 3.12924 | 8.4E-07 | 0.59496 | 2.37754 | 2.16489 | 13.9564 | 13.645  | 6.69857 |
| Ptgir         | 3.12844 | 0.00217 | 0.10422 | 0.08369 | 0.26188 | 1.26518 | 1.16542 | 0.77084 |
| Glipr2        | 3.12677 | 6.3E-06 | 0.59906 | 0.84189 | 0.71846 | 7.46071 | 5.22737 | 2.71209 |
| Cmtm3         | 3.12069 | 4.6E-08 | 0.23272 | 0.841   | 1.06327 | 7.18494 | 5.59928 | 2.49301 |
| Cd38          | 3.11916 | 3.5E-05 | 0.53128 | 0.71108 | 0.65537 | 4.47033 | 6.7513  | 2.35779 |
| H2-Aa         | 3.11659 | 3.1E-06 | 7.16917 | 11.2663 | 14.7395 | 115.842 | 98.2655 | 32.8662 |
| Scml4         | 3.11637 | 0.0005  | 0.10495 | 0.10836 | 0.0822  | 0.79081 | 0.89164 | 0.33269 |
| Ptpn7         | 3.11434 | 0.0005  | 0.22777 | 0.21339 | 0.1691  | 1.50172 | 1.76556 | 0.85687 |
| Txn14a        | 3.11318 | 0.00135 | 0.10601 | 0.21283 | 0.47224 | 2.92902 | 1.72438 | 1.09508 |
| Adgrg2        | 3.11234 | 0.04269 | 0.02194 | 0.07049 | 0.03008 | 0.50983 | 0.45732 | 0.26865 |
| S1pr2         | 3.10979 | 5.8E-07 | 0.08682 | 0.36255 | 0.4641  | 2.78039 | 2.69202 | 1.00977 |
| Calhm2        | 3.0902  | 0.00221 | 0.07967 | 0.29858 | 0.27301 | 1.701   | 1.75494 | 0.56899 |
| Veph1         | 3.08546 | 0.03642 | 0       | 0.06563 | 0.04481 | 0.40027 | 0.29078 | 0.11256 |
| Dusp12        | 3.08379 | 0.04199 | 0       | 0.47471 | 0.60767 | 1.24613 | 1.11604 | 0.84001 |
| F630028O10Rik | 3.08208 | 0.00572 | 0.2109  | 0.3105  | 0.16862 | 1.63331 | 2.51923 | 0.64549 |
| Zfp385a       | 3.0796  | 5.3E-05 | 0.35388 | 0.52777 | 0.62362 | 4.50769 | 4.93378 | 1.27651 |
| Dock10        | 3.07576 | 1.3E-11 | 0.49161 | 0.74428 | 0.78981 | 6.29036 | 5.7925  | 2.47898 |
| Tyms          | 3.07563 | 0.00026 | 0.07608 | 0.13747 | 0.11732 | 0.95551 | 0.85083 | 0.48029 |
| Lacc1         | 3.07483 | 5.4E-06 | 0.28605 | 0.38286 | 0.45742 | 2.79409 | 3.42501 | 1.53213 |
| Clec1b        | 3.0748  | 0.04958 | 0.04539 | 0.09113 | 0.10888 | 0.42755 | 0.78449 | 0.43416 |



|           |         |         |         |         |         |         |         |         |
|-----------|---------|---------|---------|---------|---------|---------|---------|---------|
| Trpc6     | 3.07249 | 6.3E-05 | 0.13717 | 0.47734 | 0.54837 | 3.04342 | 2.51011 | 1.8018  |
| Gja4      | 3.07164 | 4.9E-05 | 0.75609 | 1.71114 | 0.8479  | 7.25104 | 10.3418 | 4.83863 |
| Plxnc1    | 3.06914 | 1.1E-08 | 0.47297 | 0.70029 | 0.63814 | 5.383   | 5.23651 | 2.26188 |
| Ndrgr1    | 3.06668 | 0.00013 | 0.33377 | 0.9734  | 0.74642 | 5.47129 | 2.89312 | 2.07001 |
| Nxpe5     | 3.05683 | 0.01361 | 0       | 0.06238 | 0.08872 | 0.32518 | 0.43433 | 0.317   |
| Ier3      | 3.05628 | 1.6E-07 | 2.3553  | 3.86508 | 3.93005 | 26.557  | 25.5578 | 16.7682 |
| Slc25a45  | 3.05473 | 4.2E-05 | 0.17482 | 0.52646 | 0.23962 | 2.6895  | 2.46593 | 1.17046 |
| Kn1       | 3.05385 | 0.00273 | 0.10847 | 0.13066 | 0.1208  | 0.97059 | 1.02691 | 0.43574 |
| Clec14a   | 3.04054 | 0.00025 | 0.53585 | 1.39339 | 1.74869 | 9.19693 | 11.3229 | 4.29533 |
| H2-DMb1   | 3.03627 | 2.6E-06 | 1.40387 | 1.81633 | 2.51214 | 16.896  | 16.4919 | 6.20642 |
| Cdk1      | 3.03331 | 0.03976 | 0.20172 | 0.13499 | 0.13824 | 1.20331 | 1.29876 | 0.69456 |
| Tgm1      | 3.03288 | 0.0014  | 0.23118 | 0.1547  | 0.31686 | 1.86291 | 2.11514 | 0.82547 |
| Haus3     | 3.03287 | 0.03516 | 0.20944 | 0.40846 | 0.67665 | 2.25449 | 2.47895 | 1.3965  |
| Hsd3b7    | 3.02839 | 0.01476 | 0.20914 | 0.73896 | 0.88861 | 4.75386 | 4.16713 | 1.95228 |
| Irf4      | 3.02606 | 0.00013 | 0.2702  | 0.19726 | 0.26935 | 1.92805 | 2.06018 | 0.99616 |
| Aprt      | 3.02598 | 0.00219 | 0.93229 | 1.55494 | 1.17954 | 5.58393 | 6.05117 | 3.2924  |
| Pirb      | 3.02341 | 2.1E-06 | 0.544   | 0.85291 | 0.6391  | 7.28726 | 6.64952 | 2.29926 |
| Tmem184c  | 3.01843 | 1.3E-05 | 0.1276  | 0.47819 | 0.52468 | 3.63231 | 3.26462 | 1.0089  |
| Hsd11b1   | 3.01574 | 0.00322 | 0.57976 | 1.21767 | 1.22253 | 11.8177 | 7.79813 | 2.04745 |
| Pld3      | 3.01471 | 9.2E-07 | 0.83181 | 1.94033 | 1.65587 | 15.9679 | 11.9192 | 3.57634 |
| Adcy3     | 3.01309 | 8.9E-07 | 0.18543 | 0.40205 | 0.44477 | 2.32873 | 2.49774 | 1.26276 |
| Cyba      | 3.01044 | 5.3E-06 | 2.45238 | 3.31215 | 2.97935 | 31.2184 | 23.6279 | 7.42059 |
| Mrc2      | 3.00992 | 1.3E-10 | 0.9371  | 1.89529 | 1.93854 | 14.8416 | 12.5523 | 5.56368 |
| Ogfrl1    | 3.00283 | 4.2E-05 | 0.14283 | 0.30968 | 0.21534 | 1.98206 | 1.7061  | 0.78686 |
| H2-Ab1    | 3.00036 | 4E-06   | 8.3486  | 11.6474 | 13.1884 | 118.041 | 93.5036 | 32.2109 |
| Chst14    | 3.00031 | 4.7E-06 | 0.11083 | 0.71203 | 0.53168 | 4.28006 | 3.40834 | 1.56888 |
| Itga4     | 2.99908 | 4.6E-06 | 0.40601 | 0.75855 | 0.45995 | 5.22892 | 5.31518 | 1.6167  |
| Rhod      | 2.99261 | 0.01165 | 0.40543 | 0.27132 | 0.27785 | 2.58827 | 2.30127 | 1.13749 |
| Hhex      | 2.9924  | 0.00305 | 0.60385 | 0.24246 | 0.33107 | 2.84383 | 3.06941 | 1.66337 |
| Cd22      | 2.98949 | 0.01302 | 0.5513  | 0.35049 | 0.31485 | 3.20215 | 4.4136  | 1.35339 |
| Sdc3      | 2.98937 | 1E-09   | 1.35371 | 2.96621 | 2.79641 | 16.5756 | 14.4598 | 6.96949 |
| Fkbp10    | 2.98685 | 5.5E-05 | 0.90761 | 1.01406 | 0.81131 | 9.09388 | 8.02335 | 2.77788 |
| Akap2     | 2.98203 | 6E-05   | 1.97218 | 6.01599 | 6.36889 | 39.3254 | 22.7826 | 11.9094 |
| Ugcg      | 2.9777  | 3.8E-08 | 0.53332 | 1.37407 | 1.44674 | 8.34426 | 10.2223 | 3.85972 |
| Vegfc     | 2.97382 | 0.00059 | 0.18917 | 0.45574 | 0.3241  | 3.02902 | 2.06735 | 1.3389  |
| Gm2a      | 2.96952 | 0.00028 | 0.95417 | 1.80293 | 1.8271  | 17.111  | 13.0667 | 2.94185 |
| Cd4       | 2.96492 | 0.00084 | 0.1149  | 0.32295 | 0.1378  | 1.49709 | 1.76672 | 0.5275  |
| Icam1     | 2.96431 | 1.4E-08 | 2.76266 | 3.60515 | 4.533   | 39.5157 | 30.2458 | 12.602  |
| Serpinb6b | 2.96182 | 0.00244 | 0.89497 | 1.56424 | 1.80393 | 14.5122 | 12.363  | 3.22257 |
| Frrs1     | 2.961   | 2.2E-06 | 0.15953 | 0.19217 | 0.26239 | 1.53266 | 1.75154 | 0.79343 |
| Gpm6b     | 2.96002 | 6.4E-05 | 0.28955 | 0.61452 | 0.60947 | 4.90902 | 4.48894 | 1.17106 |
| Naip2     | 2.95826 | 2.5E-06 | 0.2868  | 0.42224 | 0.3112  | 2.94147 | 2.7334  | 1.24354 |
| Plat      | 2.95084 | 0.00434 | 0.29692 | 0.55141 | 0.41969 | 5.80318 | 2.36768 | 0.96558 |
| Adam12    | 2.94343 | 0.00108 | 0.12029 | 0.15456 | 0.16488 | 1.28411 | 1.19846 | 0.50625 |
| Sema7a    | 2.94325 | 3.3E-09 | 1.89637 | 3.15857 | 5.15034 | 27.5204 | 22.5989 | 15.9882 |
| Dck       | 2.93914 | 0.00024 | 0.15051 | 0.27196 | 0.41259 | 2.29189 | 2.33343 | 0.97891 |
| Myadm     | 2.93797 | 0.00896 | 1.99064 | 4.17293 | 4.55331 | 31.9476 | 25.5197 | 9.21812 |
| Rps27l    | 2.93657 | 0.00386 | 0.28387 | 2.05166 | 2.04269 | 14.7948 | 12.5534 | 2.60649 |
| Adgrg6    | 2.93588 | 5.7E-07 | 0.26618 | 0.76003 | 0.76346 | 4.90289 | 4.78568 | 2.03673 |
| B3gnt5    | 2.93498 | 0.0028  | 0.08914 | 0.14317 | 0.13746 | 0.9096  | 1.22342 | 0.30694 |
| Olfml3    | 2.93436 | 8.1E-07 | 0.37598 | 1.11713 | 1.3012  | 9.12472 | 6.96595 | 2.60353 |
| Bub1      | 2.93389 | 0.02137 | 0       | 0.17089 | 0.07292 | 0.78506 | 0.7031  | 0.16283 |
| Clec12a   | 2.93156 | 0.00904 | 0.12571 | 0.16825 | 0.12923 | 1.35507 | 1.28861 | 0.2565  |
| Oas3      | 2.93119 | 0.00974 | 0.11079 | 0.19573 | 0.15185 | 1.4331  | 1.06998 | 0.49168 |
| Kcnh1     | 2.93077 | 0.00051 | 0.09479 | 0.20299 | 0.2815  | 1.28965 | 1.50973 | 1.00334 |
| Nme2      | 2.92918 | 0.00032 | 1.48359 | 4.20961 | 2.84685 | 26.5814 | 18.7524 | 6.65979 |

|          |         |         |         |         |         |         |         |         |
|----------|---------|---------|---------|---------|---------|---------|---------|---------|
| C1s1     | 2.92721 | 0.001   | 0.70328 | 2.82385 | 2.91719 | 17.8039 | 12.2296 | 4.1917  |
| Hist1h4f | 2.92543 | 0.00185 | 2.96213 | 4.04385 | 4.263   | 30.5041 | 27.7042 | 12.9191 |
| Ppic     | 2.92429 | 5E-11   | 1.98135 | 4.99035 | 5.36971 | 33.3658 | 33.3726 | 14.6093 |
| F10      | 2.92368 | 0.00093 | 0.38168 | 0.27245 | 0.40689 | 2.66299 | 2.37124 | 1.78474 |
| Lims1    | 2.91851 | 6.5E-07 | 0.7104  | 1.8636  | 2.04477 | 13.7245 | 12.4339 | 4.51166 |
| Hvcn1    | 2.91474 | 0.00331 | 0.78015 | 0.80922 | 1.04702 | 7.63391 | 5.93175 | 2.21365 |
| Rrm2     | 2.9112  | 0.01546 | 0.45977 | 0.26852 | 0.31509 | 3.22819 | 2.80441 | 1.11935 |
| Itga1    | 2.90957 | 5E-05   | 0.69677 | 1.86515 | 2.00289 | 14.9852 | 11.2745 | 4.10226 |
| Plod2    | 2.90915 | 8.4E-05 | 0.33257 | 1.02378 | 0.94966 | 7.39618 | 5.18417 | 2.16303 |
| Ehd3     | 2.90752 | 8.8E-07 | 0.31662 | 0.50852 | 0.47737 | 3.39972 | 3.36362 | 1.67163 |
| Tusc5    | 2.90511 | 0.00393 | 0.03508 | 0.25351 | 0.26442 | 1.73997 | 1.51546 | 0.48309 |
| Shroom4  | 2.90016 | 1.3E-06 | 0.19564 | 0.73318 | 0.581   | 4.42254 | 3.68609 | 1.65665 |
| Pros1    | 2.89952 | 8.9E-06 | 0.67996 | 2.22966 | 2.46584 | 15.9934 | 14.401  | 4.74753 |
| Natd1    | 2.89913 | 3.4E-05 | 0.16362 | 0.3942  | 0.41116 | 2.73986 | 2.70306 | 0.98073 |
| Cd40     | 2.89726 | 0.00083 | 0.10201 | 0.30038 | 0.16313 | 1.36655 | 1.5729  | 0.67649 |
| Capg     | 2.89595 | 5.7E-08 | 0.96173 | 1.36074 | 1.38095 | 11.7903 | 9.00878 | 4.0298  |
| Ptpn22   | 2.89529 | 0.00125 | 0.46934 | 0.31892 | 0.44536 | 3.87662 | 3.17479 | 1.29837 |
| Thbd     | 2.89232 | 0.00255 | 1.61767 | 7.81942 | 9.91363 | 59.6968 | 35.3892 | 21.6612 |
| Rnf150   | 2.89032 | 6.5E-07 | 0.09404 | 0.33984 | 0.4005  | 2.43799 | 2.44472 | 0.97656 |
| Jam2     | 2.88695 | 0.00197 | 0.23669 | 0.63357 | 0.66234 | 5.53621 | 3.45889 | 1.28282 |
| Il21r    | 2.88542 | 0.01103 | 0.38328 | 0.16789 | 0.42982 | 2.90992 | 2.65665 | 1.14642 |
| Gnpda1   | 2.8829  | 0.00425 | 0.43577 | 0.50548 | 0.53092 | 4.28696 | 3.05186 | 1.85244 |
| Gimap8   | 2.8758  | 9.8E-11 | 0.62605 | 0.98036 | 1.33003 | 6.36846 | 8.1147  | 4.28732 |
| Mamld1   | 2.87021 | 0.00099 | 0.12075 | 0.23272 | 0.0993  | 1.22828 | 1.11703 | 0.48043 |
| Gimap9   | 2.86597 | 0.01108 | 0.35268 | 0.28322 | 0.33837 | 3.14468 | 2.00779 | 1.02545 |
| Nlrp1b   | 2.8601  | 0.00089 | 0.20206 | 0.22127 | 0.30213 | 1.53411 | 1.98883 | 1.12445 |
| Cyb561d2 | 2.8569  | 0.0166  | 0.11734 | 0.18847 | 0.28146 | 1.51052 | 1.61046 | 0.67341 |
| Kcnn3    | 2.85521 | 0.0011  | 0.03325 | 0.12459 | 0.10633 | 0.76547 | 0.65907 | 0.28831 |
| Ctsz     | 2.85452 | 1.9E-07 | 4.17946 | 5.74446 | 5.67343 | 55.7181 | 38.1172 | 14.2678 |
| Btk      | 2.85155 | 0.00347 | 0.3678  | 0.3249  | 0.25206 | 2.44807 | 2.78559 | 0.87242 |
| Serinc3  | 2.84838 | 0.00014 | 4.70515 | 11.2143 | 13.5389 | 98.7486 | 72.9606 | 22.5013 |
| Angpt1   | 2.84743 | 4.4E-05 | 0.16328 | 0.74302 | 0.69004 | 4.54539 | 4.27426 | 1.68662 |
| Ercc6l   | 2.84331 | 0.04592 | 0.02184 | 0.14034 | 0.07485 | 0.39779 | 0.46635 | 0.234   |
| Isg15    | 2.84261 | 0.00553 | 0.6128  | 1.10725 | 2.2048  | 12.9868 | 8.48806 | 4.5717  |
| Sema3a   | 2.8402  | 0.00015 | 0.05846 | 0.27498 | 0.26328 | 1.52606 | 1.79993 | 0.51122 |
| Bard1    | 2.83977 | 0.035   | 0.10233 | 0.03287 | 0.09818 | 0.69398 | 0.45774 | 0.3132  |
| Cd74     | 2.83781 | 2.9E-05 | 33.3494 | 51.9793 | 65.8064 | 515.737 | 394.48  | 127.903 |
| Lrrn2    | 2.83561 | 0.02006 | 0.06443 | 0.12936 | 0.11039 | 0.86988 | 0.63866 | 0.41907 |
| Slc6a2   | 2.83182 | 7.1E-05 | 0.14731 | 0.87242 | 1.71617 | 6.52108 | 5.24133 | 4.07176 |
| Was      | 2.82738 | 0.00164 | 0.14593 | 0.42969 | 0.40003 | 3.2988  | 2.39837 | 0.70718 |
| Dpt      | 2.82714 | 0.01179 | 0.73899 | 4.0462  | 3.08468 | 26.9138 | 17.4497 | 5.55164 |
| Ly6a     | 2.82542 | 0.0008  | 4.90189 | 8.95353 | 8.29958 | 89.2631 | 54.0346 | 12.1348 |
| Tspan32  | 2.82405 | 0.01858 | 0.488   | 0.06532 | 0.33444 | 1.50662 | 1.44698 | 0.77792 |
| Top2a    | 2.82253 | 0.0004  | 0.39836 | 0.48501 | 0.72213 | 4.60742 | 3.82112 | 2.10416 |
| Gm14326  | 2.8219  | 0.02634 | 0       | 0.29238 | 0.4713  | 1.1685  | 2.69373 | 0.83575 |
| Dlgap5   | 2.82058 | 0.03319 | 0.05225 | 0.06993 | 0.10742 | 0.59056 | 0.56658 | 0.23988 |
| Sirpa    | 2.81936 | 5.2E-10 | 2.02819 | 3.12491 | 2.34353 | 18.6147 | 20.9904 | 9.61816 |
| Ifngr2   | 2.81849 | 1.4E-08 | 1.11869 | 1.7125  | 1.31769 | 11.2613 | 11.0528 | 4.62764 |
| Tfpi     | 2.81826 | 0.00038 | 0.19081 | 0.4086  | 0.33417 | 2.4495  | 2.47857 | 1.03821 |
| Pgf      | 2.81401 | 0.02081 | 0.14642 | 0.11758 | 0.40138 | 1.56302 | 1.71181 | 1.00832 |
| Mthfd2   | 2.81145 | 0.0153  | 0.16607 | 0.21338 | 0.13658 | 1.71022 | 0.9961  | 0.53371 |
| Tmem206  | 2.81136 | 0.04954 | 0.10313 | 0.28988 | 0.24738 | 1.4895  | 1.70376 | 0.8286  |
| Aqp1     | 2.81089 | 0.00063 | 2.77754 | 9.94877 | 8.49022 | 69.7917 | 47.1733 | 17.0022 |
| Gucy1a3  | 2.80481 | 1.7E-06 | 0.56513 | 1.45493 | 1.26441 | 8.47498 | 9.20076 | 3.25586 |
| Igsf10   | 2.80407 | 0.00809 | 0.09129 | 0.30239 | 0.40664 | 2.57945 | 2.05905 | 0.56752 |
| Cnr2     | 2.80338 | 0.00607 | 0.31994 | 0.1635  | 0.2392  | 2.0638  | 1.71499 | 0.82345 |

|               |         |         |         |         |         |         |         |         |
|---------------|---------|---------|---------|---------|---------|---------|---------|---------|
| 4930503L19Rik | 2.80058 | 5.7E-06 | 0.22452 | 0.56665 | 0.4616  | 3.08145 | 3.19545 | 1.54614 |
| Gpx7          | 2.79729 | 0.00351 | 0       | 0.50509 | 0.43104 | 2.48251 | 2.83167 | 0.75627 |
| Mafb          | 2.79717 | 2.4E-06 | 0.7921  | 1.35517 | 1.36891 | 7.63377 | 8.98037 | 5.19127 |
| Sema3c        | 2.79644 | 0.00397 | 0.63263 | 1.40685 | 1.67862 | 10.9904 | 9.55628 | 3.3512  |
| Adam15        | 2.79497 | 6.8E-07 | 0.96123 | 2.95145 | 3.13875 | 13.8351 | 11.1036 | 6.30223 |
| Apbb1ip       | 2.79215 | 9.8E-06 | 0.32806 | 0.45162 | 0.28906 | 2.93298 | 2.80302 | 1.13555 |
| Ier5l         | 2.78873 | 4E-05   | 0.21584 | 0.62399 | 0.41417 | 2.87327 | 3.02804 | 1.78364 |
| Adamts7       | 2.78841 | 0.00024 | 0.03687 | 0.16286 | 0.17689 | 0.62515 | 0.89029 | 0.46553 |
| Aaas          | 2.78751 | 9.4E-05 | 0.25511 | 0.35851 | 0.78674 | 3.48413 | 3.4039  | 2.00079 |
| Sulf1         | 2.78711 | 3.7E-07 | 0.14357 | 0.60941 | 0.54115 | 3.5159  | 3.16927 | 1.33394 |
| Atp6v0c       | 2.78686 | 0.00681 | 2.08776 | 4.80984 | 4.19851 | 23.7908 | 17.7797 | 6.73034 |
| Rpl7l1        | 2.78399 | 0.00135 | 0.75554 | 1.74882 | 1.97976 | 8.8745  | 6.41576 | 2.61849 |
| Pkhd1l1       | 2.7824  | 0.03187 | 0.04395 | 0.10588 | 0.04217 | 0.38637 | 0.67468 | 0.1547  |
| Sema5a        | 2.77977 | 5.3E-06 | 0.22502 | 0.80885 | 0.55809 | 4.68963 | 4.00863 | 1.3528  |
| Mcm3          | 2.77348 | 1.2E-05 | 0.22001 | 0.40384 | 0.88312 | 3.67085 | 3.8502  | 1.94797 |
| Pde1b         | 2.77134 | 0.0004  | 0.27445 | 0.47228 | 0.45678 | 2.53582 | 3.10898 | 1.71001 |
| Sgk1          | 2.77056 | 4E-08   | 0.96851 | 1.80213 | 1.73219 | 13.8392 | 9.60577 | 5.22361 |
| Myo5a         | 2.77013 | 5.9E-10 | 0.39903 | 0.63459 | 0.55764 | 4.289   | 4.14004 | 1.79001 |
| Rpl22l1       | 2.76993 | 0.00261 | 0.81317 | 1.30604 | 2.46797 | 9.62875 | 12.4002 | 3.73326 |
| Ggta1         | 2.76637 | 3.9E-06 | 0.29514 | 0.96781 | 0.89335 | 5.85331 | 5.22578 | 2.31479 |
| Tgds          | 2.76546 | 0.04763 | 0.1534  | 0.24638 | 0.35043 | 1.477   | 1.5855  | 0.78252 |
| Emilin1       | 2.7633  | 4.7E-12 | 1.19643 | 2.58096 | 2.47588 | 17.3088 | 13.9278 | 7.68272 |
| Gng11         | 2.76313 | 8.2E-06 | 1.00822 | 1.82171 | 1.72738 | 10.9999 | 12.2355 | 4.91801 |
| Tubb5         | 2.76113 | 1.1E-07 | 4.17743 | 7.21257 | 6.91859 | 60.8784 | 43.919  | 16.4615 |
| Loxl1         | 2.7592  | 3.6E-06 | 0.9836  | 3.21595 | 2.96114 | 23.0068 | 17.4275 | 5.08016 |
| Snn           | 2.75866 | 1E-06   | 0.47892 | 1.21789 | 1.66842 | 6.34036 | 8.60146 | 5.16088 |
| Flt1          | 2.75028 | 7.5E-06 | 0.61994 | 1.74246 | 1.80222 | 13.4929 | 7.87289 | 4.26921 |
| Nrros         | 2.75012 | 1.2E-05 | 0.77638 | 0.69027 | 0.7791  | 6.35506 | 5.49672 | 2.63082 |
| Mcm5          | 2.74595 | 0.00081 | 0.37707 | 0.27952 | 0.39756 | 2.85951 | 2.12308 | 1.53138 |
| Lrp12         | 2.74594 | 2.2E-06 | 0.12661 | 0.56936 | 0.45118 | 3.22768 | 2.67714 | 1.22062 |
| Cstb          | 2.74362 | 0.00025 | 2.1269  | 2.95019 | 3.31273 | 29.0176 | 18.772  | 6.50969 |
| Aplnr         | 2.74096 | 0.01124 | 0.25049 | 0.37716 | 0.68665 | 1.21899 | 4.28126 | 2.20413 |
| Apobec1       | 2.7407  | 0.00095 | 1.11447 | 0.86055 | 0.76377 | 6.40594 | 7.69118 | 3.64059 |
| Zfp277        | 2.74043 | 0.0136  | 0.28318 | 0.1895  | 0.32344 | 1.95596 | 2.08713 | 0.46947 |
| Gap43         | 2.73453 | 0.04674 | 0.22814 | 0.24428 | 0.26058 | 2.19659 | 1.31426 | 0.93101 |
| Tmed5         | 2.73368 | 4.5E-05 | 0.18078 | 0.45972 | 0.35103 | 2.90413 | 2.44276 | 0.88759 |
| Themis2       | 2.73347 | 3E-06   | 0.52662 | 0.78539 | 0.64447 | 4.65316 | 4.93303 | 2.33136 |
| Sox17         | 2.73185 | 6.3E-07 | 0.4002  | 0.98558 | 0.76795 | 5.37782 | 4.23125 | 3.30719 |
| Naip5         | 2.73085 | 0.00013 | 0.13353 | 0.3932  | 0.27454 | 1.99843 | 2.05891 | 0.91958 |
| Spon1         | 2.72481 | 2.9E-05 | 0.59126 | 1.82756 | 2.13302 | 13.7859 | 10.6436 | 3.55097 |
| Runx3         | 2.72039 | 0.00083 | 0.34725 | 0.27886 | 0.28557 | 2.5875  | 2.02396 | 1.06281 |
| Galnt10       | 2.71875 | 0.00014 | 0.17475 | 0.37422 | 0.30605 | 1.92636 | 2.03311 | 0.77255 |
| Rab29         | 2.71867 | 0.01267 | 0.31558 | 0.57022 | 0.32441 | 3.26971 | 3.24835 | 0.78479 |
| Abcd2         | 2.71612 | 0.00145 | 0.14669 | 0.3029  | 0.30158 | 1.94744 | 2.0025  | 0.72154 |
| Tcf21         | 2.71375 | 0.00235 | 0.2841  | 1.06469 | 1.94701 | 9.57393 | 7.3168  | 3.47816 |
| Sh3pxd2b      | 2.70532 | 5.3E-11 | 0.84696 | 1.48484 | 1.40613 | 11.3857 | 7.64618 | 4.31739 |
| Eif2b1        | 2.70469 | 0.00184 | 0.13462 | 0.28829 | 0.49204 | 2.98682 | 2.14409 | 0.68671 |
| Nox4          | 2.70106 | 0.00036 | 0.19141 | 0.538   | 0.51535 | 3.76895 | 3.12739 | 0.92062 |
| AB124611      | 2.70072 | 0.01555 | 0.24012 | 0.57849 | 0.38397 | 3.41768 | 2.92933 | 0.97991 |
| Zfp760        | 2.69979 | 0.03366 | 0       | 0.11049 | 0.43373 | 1.19223 | 1.60851 | 0.52638 |
| C5ar2         | 2.69787 | 0.02672 | 0.06505 | 0.07836 | 0.2229  | 0.7148  | 1.20685 | 0.34841 |
| P2ry2         | 2.69506 | 5.6E-06 | 0.19081 | 0.7406  | 0.52305 | 4.21341 | 2.84496 | 1.72764 |
| Lipg          | 2.69135 | 0.00041 | 0.09175 | 0.71224 | 0.58686 | 3.43755 | 3.0314  | 1.70829 |
| Ap3m1         | 2.68442 | 0.0015  | 0.19812 | 0.37124 | 0.44128 | 3.0376  | 3.28975 | 0.77061 |
| Det1          | 2.68015 | 0.00891 | 0.10722 | 0.1722  | 0.09185 | 0.95936 | 0.76297 | 0.43069 |
| Sh3bgrl3      | 2.67816 | 0.01054 | 4.65534 | 4.41819 | 3.86714 | 52.618  | 29.5432 | 6.80036 |



|               |         |         |         |         |         |         |         |         |
|---------------|---------|---------|---------|---------|---------|---------|---------|---------|
| Psat1         | 2.67711 | 0.00354 | 0.02723 | 0.15305 | 0.48512 | 1.79508 | 1.67453 | 0.66663 |
| Scamp5        | 2.67265 | 0.01309 | 0.28119 | 0.15054 | 0.25694 | 1.51063 | 2.00102 | 0.64547 |
| Crlf1         | 2.67089 | 7.7E-05 | 0.07045 | 0.96177 | 0.96561 | 4.60069 | 5.08499 | 2.37184 |
| B4galt6       | 2.66982 | 8.7E-05 | 0.19941 | 0.25622 | 0.25966 | 1.9033  | 1.7333  | 0.67137 |
| Uba52         | 2.66868 | 0.00423 | 1.31437 | 3.97367 | 2.33138 | 21.2159 | 11.9472 | 5.62013 |
| Dhcr7         | 2.66865 | 0.01316 | 0.14395 | 0.18495 | 0.17757 | 1.06658 | 1.2585  | 0.52868 |
| Plk2          | 2.66569 | 5.1E-08 | 1.3227  | 1.75926 | 2.26618 | 13.2631 | 12.2911 | 6.83156 |
| Manba         | 2.66165 | 1.3E-06 | 0.14953 | 0.56037 | 0.31881 | 2.38908 | 2.67712 | 1.04245 |
| Fhl3          | 2.65973 | 0.01386 | 0.48172 | 0.49737 | 0.47162 | 3.24092 | 2.69346 | 1.52703 |
| Slpi          | 2.65917 | 0.0072  | 0.29446 | 1.33995 | 1.21077 | 6.22487 | 8.63114 | 2.32817 |
| Nfkbid        | 2.65758 | 0.03234 | 0.19748 | 0.19823 | 0.23683 | 1.519   | 1.22962 | 0.94438 |
| Kif18a        | 2.65754 | 0.03968 | 0.01178 | 0.05676 | 0.04844 | 0.2293  | 0.2934  | 0.17126 |
| Nrp2          | 2.65226 | 9.3E-10 | 0.55748 | 1.11529 | 0.7574  | 6.08611 | 6.09991 | 2.58184 |
| Irf5          | 2.65184 | 0.00021 | 1.31567 | 0.9605  | 0.98362 | 8.43674 | 7.94408 | 3.56923 |
| Acp2          | 2.65152 | 9.1E-07 | 0.44666 | 0.82499 | 0.91831 | 5.49724 | 5.36948 | 2.11896 |
| Prelp         | 2.64631 | 0.01217 | 1.37766 | 5.40299 | 5.46718 | 30.9615 | 20.4869 | 6.66799 |
| Stat4         | 2.6462  | 0.02538 | 0.14956 | 0.19217 | 0.123   | 1.22087 | 1.3836  | 0.50353 |
| Myc           | 2.64615 | 0.00112 | 0.42628 | 1.12966 | 0.6427  | 5.08575 | 4.26855 | 3.26171 |
| Capn6         | 2.64445 | 0.03804 | 0.02972 | 0.07159 | 0.0611  | 0.39185 | 0.45315 | 0.11369 |
| Rpl24         | 2.6444  | 0.02494 | 4.04805 | 5.50828 | 3.23657 | 52.0381 | 33.6081 | 7.39939 |
| Cd1d1         | 2.6437  | 0.02309 | 0.18026 | 0.43428 | 0.12354 | 1.16022 | 1.19117 | 0.72414 |
| Scn3b         | 2.6429  | 8.7E-06 | 0.86955 | 1.66908 | 1.14823 | 8.88269 | 10.9851 | 3.09953 |
| Nsg1          | 2.64284 | 0.00018 | 0.4323  | 0.66538 | 0.66658 | 5.47426 | 3.31437 | 1.8744  |
| Sema6d        | 2.64124 | 5.8E-07 | 0.25228 | 0.828   | 0.65399 | 4.77311 | 3.65193 | 1.96394 |
| Rps15a        | 2.6397  | 0.00018 | 0.5911  | 1.11254 | 0.9621  | 8.25854 | 6.4505  | 1.8657  |
| Ptpnb         | 2.63524 | 3E-05   | 2.17793 | 5.3797  | 6.27014 | 36.876  | 29.9694 | 14.1352 |
| Fam49b        | 2.63397 | 7.7E-06 | 0.62864 | 0.98562 | 1.02576 | 7.18052 | 6.64946 | 2.38215 |
| Tgfb1         | 2.6336  | 9.4E-07 | 0.67357 | 1.65121 | 1.5792  | 9.75026 | 9.70377 | 3.79764 |
| Mfsd7a        | 2.63266 | 0.01816 | 0.13854 | 0.29668 | 0.15824 | 1.13091 | 1.0563  | 1.16606 |
| Hist1h3f      | 2.63155 | 0.04631 | 1.36579 | 1.53552 | 0.7488  | 11.7494 | 7.98373 | 3.23967 |
| Tpgs2         | 2.63031 | 0.04163 | 0.08466 | 0.08159 | 0.09283 | 0.60605 | 0.60248 | 0.2073  |
| Garnl3        | 2.62712 | 9.7E-05 | 0.07501 | 0.12801 | 0.10281 | 0.73009 | 0.62913 | 0.40895 |
| Cd248         | 2.62503 | 5.4E-06 | 0.27145 | 1.08994 | 1.08518 | 5.90901 | 5.91013 | 2.63092 |
| Lcp1          | 2.62128 | 4.5E-05 | 1.31613 | 1.82024 | 2.17975 | 16.7123 | 14.117  | 3.79509 |
| 3830406C13Rik | 2.62024 | 0.00286 | 0.18703 | 0.63833 | 0.54475 | 3.14159 | 3.1848  | 1.71731 |
| Rps11         | 2.61972 | 0.00063 | 6.82865 | 11.8277 | 14.1311 | 88.8689 | 67.719  | 20.9001 |
| Clec1a        | 2.61456 | 1.9E-05 | 0.62605 | 0.93368 | 1.34842 | 6.02308 | 7.43279 | 3.66116 |
| Cotl1         | 2.61438 | 0.00012 | 4.86208 | 4.66209 | 4.02833 | 42.8337 | 34.3047 | 12.7711 |
| Sdk2          | 2.61189 | 0.00114 | 0.02995 | 0.10221 | 0.0667  | 0.50305 | 0.48333 | 0.18333 |
| Slc41a3       | 2.60577 | 0.04244 | 0.07957 | 0.1917  | 0.21813 | 1.37408 | 1.09208 | 0.45665 |
| Ctla2a        | 2.60409 | 0.0064  | 1.34968 | 2.77739 | 2.42801 | 22.8825 | 12.7776 | 4.84089 |
| Hells         | 2.60388 | 0.00193 | 0.09645 | 0.18072 | 0.12118 | 0.95892 | 0.90697 | 0.4305  |
| Arhgap20      | 2.60335 | 0.01457 | 0.05478 | 0.17597 | 0.16269 | 0.76252 | 1.19738 | 0.3563  |
| Foxf2         | 2.60302 | 6.1E-05 | 0.19605 | 0.70849 | 0.63821 | 3.69325 | 3.88655 | 1.50014 |
| Ccng1         | 2.60263 | 2.5E-06 | 1.18721 | 5.50848 | 4.97211 | 28.2456 | 25.9993 | 11.2037 |
| Snrpf         | 2.59945 | 0.04543 | 0.13452 | 0.97222 | 1.10624 | 5.57483 | 4.03416 | 1.44098 |
| Clstn2        | 2.59828 | 0.00297 | 0.10176 | 0.29418 | 0.22315 | 1.99355 | 1.26205 | 0.46716 |
| Kcnq5         | 2.59822 | 0.02161 | 0.07531 | 0.26612 | 0.25807 | 0.85126 | 0.42877 | 0.25356 |
| Stk17b        | 2.59765 | 1.6E-08 | 0.7386  | 2.03359 | 1.59083 | 9.82787 | 10.2797 | 5.05942 |
| Frem1         | 2.59706 | 4.9E-05 | 0.07457 | 0.14639 | 0.29528 | 0.83247 | 1.34775 | 0.74812 |
| Rab3il1       | 2.59425 | 8.9E-05 | 0.38241 | 0.42993 | 0.4892  | 3.0416  | 3.34334 | 1.30697 |
| Heyl          | 2.59387 | 0.00027 | 0.31713 | 0.89134 | 0.77619 | 4.55161 | 5.69945 | 1.54258 |
| Gnb4          | 2.59202 | 0.00013 | 0.06388 | 0.37373 | 0.39399 | 1.89666 | 1.86466 | 0.90771 |
| Gdf11         | 2.5905  | 0.01476 | 0.11405 | 0.20608 | 0.13678 | 1.05634 | 1.20293 | 0.34907 |
| Rtn4rl2       | 2.58671 | 0.01707 | 0.23072 | 0.43231 | 0.52704 | 3.33208 | 2.58002 | 1.11805 |
| Cd83          | 2.58468 | 0.04747 | 0.5945  | 0.43401 | 0.51854 | 4.00452 | 4.6152  | 1.07519 |

|               |         |         |         |         |         |         |         |         |
|---------------|---------|---------|---------|---------|---------|---------|---------|---------|
| Fam63b        | 2.58384 | 1E-04   | 0.47136 | 1.09231 | 0.95063 | 5.58131 | 5.27788 | 2.22582 |
| Pde4b         | 2.58173 | 0.0079  | 0.38387 | 0.687   | 0.72157 | 6.61836 | 3.11081 | 1.40148 |
| Vrk2          | 2.58151 | 0.00379 | 0.08786 | 0.14111 | 0.19268 | 0.9048  | 1.04505 | 0.36303 |
| Arsa          | 2.57998 | 6.8E-06 | 0.15736 | 0.63185 | 0.73334 | 3.67584 | 2.75159 | 1.85429 |
| Rap2c         | 2.57635 | 0.00039 | 0.32671 | 0.7871  | 0.35824 | 3.36449 | 3.96904 | 1.22494 |
| Abca5         | 2.57582 | 0.00308 | 0.12152 | 0.26836 | 0.29842 | 1.7932  | 1.68321 | 0.60439 |
| Zfhx4         | 2.56705 | 0.02222 | 0.02208 | 0.06501 | 0.03026 | 0.23569 | 0.23942 | 0.12952 |
| Sh3kbp1       | 2.56621 | 1.6E-06 | 0.38989 | 0.5249  | 0.44009 | 3.4707  | 3.2525  | 1.36879 |
| Rubcnl        | 2.56306 | 0.0184  | 0.26213 | 0.28067 | 0.17964 | 1.37168 | 1.73216 | 0.83573 |
| Rpl32         | 2.56153 | 0.00022 | 6.73507 | 11.5899 | 11.6216 | 86.1689 | 70.9757 | 22.8223 |
| Nt5dc2        | 2.55684 | 0.00296 | 0.82316 | 0.99156 | 1.2975  | 8.42528 | 7.02941 | 2.96032 |
| Peak1         | 2.55628 | 1.4E-07 | 0.61512 | 2.01774 | 2.17206 | 14.9524 | 10.5247 | 4.94597 |
| Sftpc         | 2.55111 | 0.02211 | 89.4574 | 148.42  | 209.292 | 1686.18 | 829.544 | 268.397 |
| Lpl           | 2.55086 | 4.1E-05 | 1.49664 | 2.89542 | 2.23783 | 14.6948 | 15.6817 | 6.57172 |
| St6galnac3    | 2.54886 | 0.00052 | 0.04091 | 0.09855 | 0.1682  | 0.68497 | 0.7624  | 0.3443  |
| S100a6        | 2.54619 | 0.00059 | 3.7279  | 7.75639 | 3.54188 | 48.36   | 34.2375 | 10.4374 |
| Fstl3         | 2.54572 | 0.00093 | 0.14211 | 0.79885 | 0.58434 | 5.65153 | 3.90068 | 1.30484 |
| Maf           | 2.54571 | 1E-05   | 1.06811 | 1.24147 | 1.07872 | 5.44498 | 4.93631 | 2.31203 |
| Sla           | 2.54521 | 0.01428 | 0.39086 | 0.50625 | 0.5962  | 5.9378  | 4.60793 | 1.833   |
| Tmem123       | 2.5448  | 9.3E-05 | 1.49011 | 3.79932 | 3.3955  | 24.9594 | 21.0755 | 5.7009  |
| Dchs1         | 2.5444  | 3.5E-05 | 0.25151 | 0.65641 | 0.64636 | 3.05987 | 2.51956 | 1.29098 |
| Mex3a         | 2.53563 | 0.00935 | 0.08018 | 0.19316 | 0.08242 | 0.8559  | 0.76417 | 0.35276 |
| Adgrf5        | 2.53477 | 0.0013  | 2.08977 | 5.35058 | 6.86318 | 43.5079 | 28.2044 | 10.7051 |
| St3gal1       | 2.53444 | 1.6E-07 | 1.46371 | 2.64939 | 3.16855 | 22.1899 | 13.9118 | 6.84432 |
| Tmem167       | 2.53337 | 0.00039 | 0.1286  | 0.42171 | 0.39661 | 2.09289 | 2.49496 | 0.77083 |
| Mfap2         | 2.53319 | 1.9E-05 | 0.66948 | 1.53606 | 2.03184 | 10.7498 | 8.75049 | 4.82986 |
| D430019H16Rik | 2.53132 | 0.00172 | 0.10009 | 0.3215  | 0.13718 | 1.05582 | 1.36342 | 0.6586  |
| Gm8113        | 2.52924 | 0.03028 | 0.38308 | 0.64945 | 0.32088 | 1.28293 | 2.09868 | 1.56332 |
| Prkcb         | 2.5284  | 0.0089  | 0.65848 | 0.41128 | 0.41784 | 3.88976 | 4.38839 | 1.1943  |
| Lrrc40        | 2.5261  | 0.00358 | 0.04855 | 0.17545 | 0.21628 | 1.24996 | 0.95013 | 0.48295 |
| Marcks11      | 2.52579 | 3.1E-06 | 1.15458 | 1.85438 | 1.82978 | 10.9203 | 10.7472 | 5.19024 |
| Mertk         | 2.52416 | 3.4E-07 | 0.50751 | 1.78038 | 1.59258 | 9.97973 | 6.99233 | 4.33292 |
| Cystm1        | 2.5231  | 0.01041 | 0.57094 | 0.68774 | 0.83845 | 6.27392 | 4.99577 | 1.49781 |
| Manea         | 2.51933 | 0.00181 | 0.09519 | 0.47775 | 0.30986 | 2.36095 | 2.08052 | 0.6373  |
| Ikzf3         | 2.51909 | 0.01452 | 0.4366  | 0.40374 | 0.14507 | 2.44248 | 2.78418 | 1.02247 |
| Cep192        | 2.51885 | 1E-07   | 0.25766 | 0.58626 | 0.53955 | 3.07408 | 3.23789 | 1.50056 |
| Ankrd49       | 2.51841 | 0.00074 | 0.08765 | 0.39888 | 0.16019 | 1.24757 | 1.4703  | 0.82718 |
| Parvg         | 2.51655 | 0.00092 | 0.52475 | 0.5117  | 0.53943 | 3.29504 | 3.52466 | 2.00759 |
| Ecscr         | 2.51592 | 0.00253 | 0.62046 | 1.16261 | 1.32288 | 8.65788 | 6.13243 | 3.27052 |
| Tmem86a       | 2.51151 | 0.00013 | 0.18413 | 0.93649 | 0.71507 | 3.81553 | 4.52376 | 1.97248 |
| Ikzf1         | 2.51041 | 0.00034 | 0.70169 | 0.72449 | 0.61828 | 5.94197 | 5.03418 | 1.64141 |
| Tek           | 2.50442 | 0.00015 | 0.78655 | 2.38838 | 2.88047 | 13.968  | 12.7813 | 6.30049 |
| Mreg          | 2.50415 | 0.02274 | 0.15213 | 0.3665  | 0.27801 | 1.56024 | 1.77851 | 1.04762 |
| Brca1         | 2.50354 | 0.01314 | 0.08144 | 0.0763  | 0.13953 | 0.71593 | 0.58644 | 0.37388 |
| Col5a3        | 2.50189 | 0.01305 | 0.30617 | 0.58737 | 0.60617 | 3.71695 | 2.94832 | 1.78308 |
| Rsad2         | 2.50128 | 0.00972 | 0.10704 | 0.4298  | 0.36679 | 1.99964 | 1.99956 | 1.00333 |
| Cln5          | 2.50112 | 1.2E-07 | 0.17193 | 0.35735 | 0.42972 | 2.21633 | 2.20022 | 1.006   |
| Rassf4        | 2.5003  | 3.4E-08 | 0.45276 | 0.86858 | 1.01705 | 4.89633 | 5.74713 | 2.53092 |
| Egflam        | 2.49384 | 8.4E-06 | 0.24598 | 0.9269  | 1.07629 | 5.20407 | 5.12636 | 1.9835  |
| Slc20a1       | 2.49339 | 1.1E-06 | 1.01705 | 1.53348 | 1.74962 | 7.48116 | 6.95273 | 4.79631 |
| B130024G19Rik | 2.49269 | 0.04674 | 0.01893 | 0.1976  | 0.0908  | 0.4041  | 0.75044 | 0.39104 |
| Blm           | 2.49157 | 0.04378 | 0.05128 | 0.15099 | 0.05857 | 0.63324 | 0.63424 | 0.1831  |
| Hbp1          | 2.49051 | 0.00117 | 0.35683 | 0.84457 | 0.96529 | 5.4129  | 4.67763 | 1.55197 |
| Camk4         | 2.48552 | 0.00769 | 0.08453 | 0.06788 | 0.08368 | 0.51311 | 0.46788 | 0.30903 |
| Pqlc3         | 2.48494 | 0.00263 | 0.19275 | 0.48155 | 0.32289 | 2.83751 | 2.27517 | 0.65548 |
| Dcbld1        | 2.4844  | 0.00018 | 0.19144 | 0.4612  | 0.4723  | 1.80313 | 2.58839 | 1.72847 |

|          |         |         |         |         |         |         |         |         |
|----------|---------|---------|---------|---------|---------|---------|---------|---------|
| Uck2     | 2.48265 | 6.1E-10 | 0.48753 | 1.0043  | 0.97328 | 5.8165  | 5.15016 | 2.75723 |
| Pik3r6   | 2.48019 | 0.00469 | 0.35174 | 0.33382 | 0.32871 | 1.7268  | 2.24303 | 1.49251 |
| Rnf122   | 2.48008 | 0.00405 | 0.09642 | 0.15486 | 0.19824 | 1.02929 | 0.93122 | 0.54104 |
| Prorsd1  | 2.47751 | 0.03575 | 0.10885 | 0.43707 | 0.2238  | 1.94802 | 1.79823 | 0.54139 |
| Racgap1  | 2.47706 | 0.00299 | 0.17997 | 0.1708  | 0.23546 | 1.2431  | 1.11439 | 0.6635  |
| Lgals9   | 2.4757  | 0.00188 | 1.73431 | 2.35024 | 1.26284 | 18.139  | 10.4409 | 4.10549 |
| Slc6a14  | 2.47145 | 0.00222 | 0.23609 | 0.92088 | 1.31749 | 5.86638 | 5.89742 | 1.98712 |
| Pdgfd    | 2.46925 | 0.00786 | 0.07344 | 0.29489 | 0.25166 | 1.3835  | 1.32526 | 0.73054 |
| Tpp1     | 2.46793 | 1.5E-05 | 0.5607  | 1.76507 | 1.81371 | 11.0695 | 9.02907 | 3.1405  |
| Iigp1    | 2.46752 | 0.02893 | 1.89259 | 1.40064 | 1.55135 | 12.49   | 12.8457 | 5.25306 |
| Fau      | 2.46466 | 0.04269 | 9.94766 | 6.04841 | 12.2712 | 110.829 | 77.6524 | 16.7455 |
| Scd2     | 2.46456 | 3.4E-05 | 3.33461 | 10.3532 | 11.0915 | 49.4666 | 54.7148 | 26.2303 |
| Zfp948   | 2.46397 | 0.00082 | 0.26605 | 0.4273  | 0.4862  | 2.89568 | 2.36657 | 1.25534 |
| Anxa3    | 2.46391 | 1.9E-14 | 2.51159 | 5.76996 | 5.81734 | 26.8905 | 30.2518 | 18.415  |
| Brip1    | 2.46388 | 0.02256 | 0.03108 | 0.04991 | 0.11713 | 0.48783 | 0.45018 | 0.19022 |
| Plxdc1   | 2.46317 | 0.00771 | 0.11975 | 0.13463 | 0.22978 | 1.39858 | 0.88867 | 0.4398  |
| Zfp37    | 2.46208 | 0.03338 | 0.08504 | 0.13658 | 0.13598 | 0.71196 | 0.79244 | 0.43378 |
| Epha4    | 2.46006 | 0.00033 | 0.17256 | 0.34644 | 0.30551 | 2.01365 | 1.79085 | 0.80324 |
| Bcl2l11  | 2.4596  | 4.6E-05 | 0.24523 | 0.46336 | 0.42509 | 2.83514 | 2.64697 | 0.94923 |
| Ifitm3   | 2.45898 | 0.00121 | 8.02876 | 12.895  | 11.824  | 109.411 | 63.7339 | 23.6583 |
| March3   | 2.45681 | 0.00012 | 0.07714 | 0.30972 | 0.23788 | 1.42885 | 1.49972 | 0.66399 |
| Unc5a    | 2.45498 | 0.00247 | 0.05558 | 0.31241 | 0.19043 | 1.20396 | 1.11584 | 0.72291 |
| Tspan7   | 2.45446 | 0.01067 | 0.73749 | 1.44771 | 1.87566 | 10.9393 | 8.61369 | 3.44851 |
| Daglb    | 2.45418 | 9.9E-06 | 0.26152 | 0.48565 | 0.44806 | 2.494   | 3.13216 | 1.25064 |
| Tank     | 2.45386 | 1.8E-05 | 0.17099 | 0.47298 | 0.5078  | 2.97061 | 2.56886 | 0.94494 |
| Adamts1  | 2.45385 | 0.00109 | 1.74755 | 6.10468 | 5.01508 | 41.8087 | 21.2967 | 8.64142 |
| Slc31a2  | 2.45332 | 9E-05   | 0.34182 | 0.91499 | 0.89797 | 5.07975 | 4.34368 | 2.4411  |
| Degs1    | 2.45274 | 0.00023 | 0.58111 | 2.04612 | 1.89931 | 11.5924 | 9.97473 | 3.59134 |
| Spn      | 2.45135 | 0.00096 | 0.54433 | 0.5166  | 0.54261 | 3.51124 | 3.69754 | 1.8364  |
| Sgpl1    | 2.45116 | 9E-07   | 0.52791 | 1.34751 | 1.39545 | 8.15699 | 7.16844 | 2.89968 |
| Zfp709   | 2.44905 | 0.01656 | 0.07281 | 0.11693 | 0.15966 | 0.84119 | 0.9844  | 0.2674  |
| Eno1     | 2.44358 | 0.0002  | 1.09812 | 2.14409 | 2.11012 | 16.7788 | 13.5385 | 4.05292 |
| Armcx2   | 2.44314 | 0.00011 | 0.20445 | 0.4515  | 0.57796 | 2.98479 | 2.97474 | 0.97772 |
| Commd3   | 2.4422  | 0.00058 | 0.34795 | 0.99795 | 0.88571 | 5.02529 | 5.0786  | 2.16797 |
| Itga5    | 2.44103 | 3.8E-05 | 1.32976 | 2.61731 | 2.03704 | 16.4706 | 12.1798 | 5.46646 |
| Ndufa4l2 | 2.43964 | 0.04322 | 0       | 1.16261 | 1.15752 | 5.68174 | 3.67946 | 2.95402 |
| Pim1     | 2.4376  | 7.2E-07 | 3.07329 | 2.57378 | 2.73804 | 11.4961 | 11.6493 | 6.18127 |
| Pdgfra   | 2.43709 | 3.7E-05 | 1.16697 | 3.44236 | 3.55531 | 22.1139 | 15.5459 | 6.71904 |
| Stx11    | 2.43666 | 0.00347 | 0.29003 | 0.46582 | 0.3644  | 2.21578 | 2.53078 | 1.22057 |
| Mcemp1   | 2.43129 | 0.03938 | 0.31009 | 0.43578 | 0.31877 | 2.62866 | 2.12788 | 0.88976 |
| Adamtsl3 | 2.42914 | 3.6E-06 | 0.16452 | 0.42036 | 0.47148 | 2.2633  | 2.29586 | 1.17871 |
| Plpp1    | 2.42885 | 0.01251 | 0.49586 | 2.0479  | 2.08748 | 13.967  | 7.59746 | 3.79415 |
| Lef1     | 2.42818 | 0.01929 | 0.14497 | 0.10584 | 0.16258 | 0.9848  | 1.04505 | 0.35295 |
| Tlr3     | 2.42782 | 0.00212 | 0.20019 | 0.2858  | 0.3506  | 1.96935 | 2.12556 | 0.62972 |
| Bmpr2    | 2.4254  | 0.00111 | 1.6062  | 4.34808 | 4.47405 | 26.9172 | 22.1009 | 8.14051 |
| Maged2   | 2.42455 | 0.00013 | 0.50061 | 0.68917 | 0.66165 | 4.49066 | 3.78056 | 1.86051 |
| Nptx1    | 2.4187  | 0.00765 | 0.0222  | 0.17828 | 0.36514 | 1.25462 | 0.95918 | 0.81537 |
| Akap5    | 2.41832 | 9.3E-07 | 1.54448 | 2.95763 | 3.39638 | 16.5829 | 17.306  | 8.88283 |
| Lax1     | 2.41594 | 0.02921 | 0.45144 | 0.36253 | 0.48126 | 2.67723 | 3.16156 | 1.26656 |
| G6pdx    | 2.41567 | 7.5E-05 | 0.71447 | 1.08711 | 1.10813 | 6.82399 | 5.81068 | 2.64711 |
| Zfp52    | 2.41482 | 0.02311 | 0.15975 | 0.64144 | 0.32844 | 2.64155 | 2.54432 | 0.93714 |
| Ncapd2   | 2.41362 | 5.7E-05 | 1.20125 | 1.75124 | 1.48183 | 4.5142  | 4.63117 | 3.49278 |
| Zfp930   | 2.41361 | 0.03749 | 0.03859 | 0.21695 | 0.26449 | 1.139   | 1.23589 | 0.50202 |
| Trem12   | 2.4133  | 0.02177 | 0.15412 | 0.24753 | 0.10562 | 1.19356 | 0.94006 | 0.53066 |
| Dock11   | 2.41314 | 0.00109 | 0.21309 | 0.40263 | 0.26629 | 2.23531 | 2.02609 | 0.69055 |
| Cd44     | 2.41268 | 2.6E-07 | 1.43578 | 2.41581 | 2.7059  | 17.1405 | 14.9437 | 5.29683 |



|           |         |         |         |         |         |         |         |         |
|-----------|---------|---------|---------|---------|---------|---------|---------|---------|
| Hist1h2bc | 2.41118 | 0.00673 | 4.09144 | 3.53837 | 4.09806 | 31.0272 | 22.6367 | 9.27144 |
| Dock2     | 2.41024 | 0.00105 | 1.09483 | 0.81408 | 0.8962  | 6.49284 | 7.4974  | 3.31988 |
| Ptpn      | 2.41008 | 0.01293 | 0.08177 | 0.24078 | 0.16812 | 1.28371 | 0.91445 | 0.43799 |
| Rhog      | 2.40891 | 0.00115 | 1.14188 | 2.81646 | 2.17996 | 18.1816 | 11.9401 | 4.36862 |
| Mettl23   | 2.40332 | 0.02621 | 0       | 0.27589 | 0.2943  | 1.75276 | 1.28788 | 0.32859 |
| Rnase4    | 2.39746 | 0.00768 | 1.56669 | 3.26183 | 3.69824 | 24.5943 | 18.8176 | 4.35111 |
| Brca2     | 2.39635 | 0.00355 | 0.04547 | 0.10225 | 0.11842 | 0.42831 | 0.66106 | 0.29923 |
| Grb10     | 2.39274 | 1.2E-05 | 0.2676  | 1.3917  | 1.12654 | 6.44126 | 5.84244 | 2.30107 |
| Sdcbp     | 2.39124 | 2.2E-05 | 1.20785 | 2.74823 | 2.39131 | 15.1267 | 15.0504 | 4.74936 |
| Fkbp5     | 2.39007 | 0.01137 | 0.41865 | 2.11948 | 2.83163 | 17.7044 | 6.80032 | 3.59329 |
| Pmp22     | 2.3897  | 0.00136 | 1.77124 | 4.18815 | 4.24851 | 28.7012 | 20.3574 | 7.52936 |
| Psmb8     | 2.3867  | 0.00393 | 1.18528 | 1.2238  | 1.62459 | 10.2338 | 7.07919 | 2.33212 |
| Nme1      | 2.38529 | 0.03553 | 0.13862 | 0.77925 | 0.855   | 3.30772 | 3.0475  | 1.538   |
| Map2      | 2.38478 | 0.00027 | 0.05633 | 0.11874 | 0.14959 | 0.64993 | 0.78738 | 0.31248 |
| Rgs10     | 2.38004 | 0.00627 | 0.7446  | 0.81539 | 1.20613 | 5.61067 | 6.46862 | 2.9005  |
| Car2      | 2.3786  | 0.00374 | 0.81293 | 0.96004 | 0.6882  | 6.48591 | 5.42044 | 1.82949 |
| Prmt6     | 2.37595 | 0.0243  | 0.22077 | 0.68698 | 0.62409 | 1.16099 | 1.41673 | 1.03465 |
| Rasl11a   | 2.37572 | 0.02271 | 0       | 0.61954 | 0.5948  | 3.39106 | 2.20584 | 1.10683 |
| Cxcr4     | 2.37524 | 0.00151 | 0.96089 | 1.95483 | 1.75604 | 13.3948 | 8.5637  | 3.82323 |
| Sox7      | 2.37083 | 0.00979 | 0.42142 | 1.09986 | 1.03488 | 7.27703 | 4.62331 | 2.0422  |
| Arhgef6   | 2.3691  | 6.5E-06 | 0.31149 | 0.71779 | 0.63112 | 3.3931  | 3.76551 | 1.66837 |
| Dclk1     | 2.36761 | 0.00138 | 0.07572 | 0.17026 | 0.25946 | 1.16012 | 1.32399 | 0.57358 |
| Rhoh      | 2.36749 | 0.04228 | 0.17451 | 0.12457 | 0.19933 | 0.94971 | 1.32074 | 0.43027 |
| Id2       | 2.36574 | 0.00465 | 2.00632 | 2.34352 | 1.62496 | 16.9504 | 12.6087 | 4.11702 |
| Tgfb2     | 2.3651  | 4.7E-05 | 0.34    | 0.7388  | 0.86349 | 3.96848 | 4.25956 | 1.49971 |
| Klhl13    | 2.36354 | 0.01595 | 0.02723 | 0.21869 | 0.18663 | 0.8208  | 1.02433 | 0.45842 |
| Lrp2      | 2.36198 | 0.00052 | 0.34674 | 0.49565 | 0.78893 | 4.97296 | 2.67901 | 1.4327  |
| Gucy1b3   | 2.36194 | 0.00017 | 0.67834 | 1.39738 | 1.27336 | 8.01896 | 6.77612 | 3.22708 |
| Phlda3    | 2.36158 | 7E-08   | 1.18865 | 4.5341  | 4.58215 | 19.4527 | 21.7888 | 11.8237 |
| Ifitm2    | 2.36109 | 0.02289 | 2.12188 | 5.96391 | 6.42254 | 51.0749 | 28.5818 | 6.35903 |
| Pop4      | 2.35944 | 0.01543 | 0.122   | 0.26126 | 0.33444 | 1.68537 | 1.50899 | 0.65345 |
| Txndc16   | 2.35896 | 0.0002  | 0.06708 | 0.29626 | 0.36009 | 1.5514  | 1.61953 | 0.67577 |
| Rab13     | 2.35885 | 0.01104 | 0.07015 | 0.56335 | 0.43268 | 2.11439 | 1.92553 | 1.61031 |
| Dse       | 2.35859 | 0.0004  | 0.44188 | 0.82176 | 0.79692 | 5.30113 | 4.65769 | 1.44142 |
| Mrps14    | 2.3546  | 0.0245  | 0.03555 | 0.25693 | 0.34107 | 1.8974  | 1.22874 | 0.40801 |
| Kif22     | 2.35455 | 0.04005 | 0.09449 | 0.17073 | 0.32377 | 0.86031 | 0.98459 | 0.65069 |
| Ntpcr     | 2.35382 | 0.00661 | 0.25998 | 0.34796 | 0.41572 | 1.95896 | 2.42269 | 0.96147 |
| Mme       | 2.35225 | 0.01488 | 0.09031 | 0.33845 | 0.45387 | 2.5015  | 1.72401 | 0.52211 |
| Celf2     | 2.3501  | 2.8E-06 | 0.26847 | 0.63601 | 0.56117 | 3.35197 | 2.98405 | 1.20516 |
| Nmnat2    | 2.34852 | 0.00285 | 0.12021 | 0.30568 | 0.15103 | 1.23286 | 1.23221 | 0.52121 |
| Fermt3    | 2.34847 | 0.00026 | 1.25355 | 1.15047 | 1.13521 | 8.40554 | 7.21384 | 3.63115 |
| S1pr3     | 2.34737 | 9.3E-05 | 0.49076 | 1.18231 | 1.11519 | 7.10394 | 5.76372 | 2.19377 |
| Plin2     | 2.34733 | 1.2E-05 | 1.28615 | 3.09852 | 3.05107 | 19.9417 | 13.6115 | 6.51028 |
| Pik3r5    | 2.34587 | 0.00011 | 0.73039 | 0.72061 | 1.0011  | 5.72637 | 4.29602 | 3.14563 |
| Spred3    | 2.34404 | 0.01049 | 0.16764 | 0.22437 | 0.19148 | 0.93569 | 1.01306 | 0.96915 |
| Spi1      | 2.34388 | 0.00745 | 1.03141 | 0.79377 | 0.7363  | 6.44956 | 5.7233  | 2.23607 |
| Cd37      | 2.34063 | 0.01309 | 1.15096 | 1.0035  | 1.05921 | 5.94695 | 7.60547 | 4.22722 |
| Mcm4      | 2.34027 | 0.00311 | 0.29044 | 0.62196 | 0.59712 | 4.03247 | 3.37907 | 0.86423 |
| Gpr182    | 2.33688 | 0.00311 | 0.23433 | 0.56454 | 0.48178 | 2.72218 | 3.11181 | 0.98617 |
| Wsb1      | 2.33434 | 4.1E-07 | 1.22007 | 2.51942 | 2.26951 | 9.28459 | 12.359  | 8.49086 |
| Actb      | 2.33392 | 3.3E-05 | 62.2977 | 123.942 | 104.794 | 839.677 | 583.417 | 204.962 |
| Calu      | 2.33276 | 0.00084 | 1.4406  | 5.26577 | 5.42998 | 30.2883 | 24.0636 | 8.41924 |
| Scoc      | 2.33128 | 0.00255 | 0.1624  | 0.65208 | 0.76053 | 2.97431 | 2.90298 | 1.49116 |
| Pole      | 2.33081 | 0.0359  | 0.12077 | 0.08729 | 0.14898 | 0.69769 | 0.71824 | 0.45281 |
| Chst15    | 2.3305  | 0.03211 | 0.70936 | 1.26014 | 0.98701 | 4.81872 | 3.75867 | 2.07242 |
| Prex2     | 2.32749 | 8.1E-05 | 0.99033 | 2.02498 | 2.32695 | 11.3398 | 11.0831 | 5.41262 |

|          |         |         |         |         |         |         |         |         |
|----------|---------|---------|---------|---------|---------|---------|---------|---------|
| Arpc1b   | 2.32746 | 1.7E-09 | 1.83409 | 3.45487 | 3.61562 | 21.3131 | 18.5764 | 7.72723 |
| Pecam1   | 2.32613 | 5.8E-05 | 2.92635 | 5.86424 | 6.8628  | 40.5439 | 30.0361 | 13.291  |
| Wdr5b    | 2.32514 | 0.03694 | 0.06492 | 0.31281 | 0.31144 | 0.89685 | 1.64998 | 1.04318 |
| Selenon  | 2.32453 | 1.6E-05 | 0.64006 | 1.2593  | 1.07468 | 7.4153  | 5.87249 | 2.54671 |
| Ifi208   | 2.32321 | 0.01501 | 0.04408 | 0.24779 | 0.22656 | 1.30091 | 1.09789 | 0.47219 |
| Cdk19    | 2.32028 | 0.00038 | 0.41605 | 1.20914 | 1.4935  | 5.46131 | 5.79046 | 2.77413 |
| Naip6    | 2.32016 | 0.00309 | 0.20358 | 0.2316  | 0.19765 | 1.01201 | 1.44872 | 0.75289 |
| Cfh      | 2.31889 | 0.04651 | 0.53573 | 2.80224 | 1.97465 | 15.3108 | 9.70026 | 2.59248 |
| Laptm5   | 2.31386 | 3.2E-06 | 4.06651 | 5.03347 | 5.40608 | 37.9566 | 28.7052 | 14.271  |
| H2-Eb1   | 2.30964 | 0.00216 | 19.075  | 18.5389 | 25.8767 | 165.354 | 145.637 | 56.7351 |
| Acot9    | 2.30742 | 0.00079 | 0.61145 | 0.8593  | 1.08252 | 5.56725 | 5.15416 | 2.37829 |
| Mad2l1   | 2.30652 | 0.00687 | 0.05522 | 0.16628 | 0.10406 | 0.71946 | 0.59643 | 0.34857 |
| Gimap6   | 2.30634 | 0.00214 | 1.027   | 0.93115 | 0.86275 | 6.09519 | 7.20736 | 2.33212 |
| Gjc1     | 2.30301 | 0.00032 | 0.1852  | 0.50195 | 0.30144 | 2.22409 | 1.70624 | 1.09824 |
| Abcb1b   | 2.3029  | 0.00425 | 0.15767 | 0.21706 | 0.23154 | 1.31535 | 1.13346 | 0.70662 |
| Adam10   | 2.3023  | 0.00017 | 1.06083 | 2.91539 | 2.73031 | 15.6318 | 14.1756 | 5.19494 |
| Nynrin   | 2.29956 | 0.00091 | 0.45169 | 0.97562 | 1.09944 | 3.21771 | 3.18266 | 1.96643 |
| Mob3a    | 2.29483 | 0.0442  | 1.31414 | 0.59801 | 0.93062 | 8.0593  | 5.94502 | 1.97754 |
| Tmem229b | 2.29236 | 0.00068 | 0.29371 | 0.37345 | 0.53676 | 2.32072 | 2.71216 | 1.1424  |
| Zeb2     | 2.29228 | 1.3E-06 | 0.8944  | 1.50179 | 1.40103 | 8.25655 | 8.85048 | 3.43515 |
| Zfp41    | 2.29176 | 0.02429 | 0.08541 | 0.18291 | 0.1756  | 0.94751 | 0.88278 | 0.4357  |
| Ncf2     | 2.28973 | 0.00024 | 0.64096 | 1.11897 | 0.68754 | 5.59971 | 4.87289 | 2.26029 |
| Snhg1    | 2.28904 | 0.00021 | 9.16723 | 4.85562 | 5.85472 | 7.52002 | 7.23747 | 6.4473  |
| Dapp1    | 2.2878  | 0.00198 | 0.26398 | 0.37097 | 0.40704 | 2.32061 | 1.96238 | 1.03517 |
| Naa60    | 2.28619 | 0.04651 | 0.63754 | 1.38964 | 1.91411 | 6.44337 | 5.33931 | 2.50879 |
| Pmaip1   | 2.28597 | 0.00128 | 0.26263 | 0.66786 | 0.53995 | 2.88596 | 3.07039 | 1.50715 |
| Enpp2    | 2.28559 | 0.00037 | 0.33348 | 0.8302  | 1.27984 | 5.42358 | 4.86498 | 2.32205 |
| Ptbp3    | 2.2849  | 0.00023 | 1.20774 | 2.15114 | 2.57856 | 13.3105 | 12.4511 | 4.63244 |
| Satb1    | 2.28479 | 2.7E-05 | 0.20612 | 0.29343 | 0.28893 | 1.64725 | 1.69061 | 0.75272 |
| Ppa1     | 2.28366 | 0.0064  | 0.11973 | 0.4487  | 0.65643 | 3.15765 | 2.29237 | 1.00775 |
| Cenpf    | 2.28234 | 0.01195 | 0.1225  | 0.3197  | 0.3218  | 1.74989 | 1.39058 | 0.75764 |
| Dnttip2  | 2.28212 | 0.02666 | 0.42002 | 1.18053 | 1.12739 | 4.43962 | 3.13126 | 1.49977 |
| Rab32    | 2.28176 | 0.02423 | 0.60437 | 0.57358 | 0.5648  | 3.96751 | 3.60266 | 1.4714  |
| Zfp160   | 2.28058 | 0.00148 | 0.15276 | 0.36801 | 0.54437 | 2.11023 | 2.51574 | 0.91169 |
| Tmem185b | 2.28033 | 0.00908 | 0.24607 | 0.42816 | 0.50592 | 2.72981 | 2.6267  | 0.87867 |
| Mlc1     | 2.27957 | 0.03481 | 0.20675 | 0.23244 | 0.82178 | 3.7908  | 2.12281 | 0.91753 |
| Pold4    | 2.27689 | 0.01506 | 0.89092 | 1.22649 | 1.30835 | 6.3136  | 8.08672 | 3.01894 |
| Mrpl30   | 2.27489 | 0.02578 | 0.32312 | 0.40363 | 0.27065 | 2.7278  | 1.8249  | 0.71424 |
| Zdhhc13  | 2.27142 | 0.02207 | 0.3364  | 0.50171 | 0.36228 | 2.23309 | 2.93135 | 0.88253 |
| Aim2     | 2.26845 | 0.03415 | 0.19849 | 0.18596 | 0.3174  | 1.45411 | 1.44614 | 0.68345 |
| Ppfia4   | 2.26814 | 0.0011  | 0.17623 | 0.26889 | 0.28986 | 1.2726  | 1.38847 | 0.98437 |
| Cfp      | 2.26748 | 0.00477 | 0.93403 | 1.17868 | 0.82299 | 7.07991 | 5.66331 | 2.39929 |
| Runx2    | 2.26708 | 0.01222 | 0.30144 | 0.34732 | 0.13473 | 1.43198 | 1.37235 | 0.75213 |
| Tmem100  | 2.26371 | 0.03705 | 1.76973 | 3.26346 | 4.71656 | 27.2055 | 17.858  | 6.72052 |
| Hif1a    | 2.26285 | 0.00035 | 0.78575 | 1.40396 | 1.57507 | 11.5207 | 7.98797 | 2.82576 |
| Pcdh19   | 2.26269 | 0.01166 | 0.03321 | 0.07111 | 0.15929 | 0.59771 | 0.61324 | 0.28795 |
| B3gnt7   | 2.26253 | 0.04701 | 0.24748 | 0.14195 | 0.3392  | 1.17658 | 2.04864 | 0.73039 |
| Kif11    | 2.25929 | 0.0086  | 0.16824 | 0.48251 | 0.31295 | 1.99209 | 1.99129 | 0.82754 |
| Slc39a10 | 2.25903 | 0.00311 | 0.15202 | 0.62565 | 0.54695 | 3.57963 | 2.35679 | 0.90147 |
| Pag1     | 2.2586  | 0.00011 | 0.5803  | 0.89319 | 0.75396 | 5.07869 | 4.98993 | 1.83161 |
| Psap     | 2.25852 | 8E-07   | 33.26   | 45.7247 | 45.7031 | 305.164 | 256.897 | 119.819 |
| Dhrs1    | 2.25752 | 0.00084 | 0.20982 | 0.84247 | 0.54641 | 3.29376 | 3.3915  | 1.38068 |
| Itgae    | 2.2568  | 0.01963 | 0.45509 | 0.42637 | 0.43316 | 3.28625 | 2.40317 | 1.27679 |
| Npc1     | 2.25436 | 0.00047 | 0.41036 | 0.8412  | 0.92509 | 5.71638 | 4.08943 | 1.66086 |
| Sacs     | 2.25391 | 3.3E-07 | 0.11914 | 0.27337 | 0.27995 | 1.35021 | 1.26025 | 0.75102 |
| Nnmt     | 2.25271 | 0.0428  | 0.14698 | 0.17705 | 0.60436 | 2.16887 | 1.75568 | 0.95593 |

|         |         |         |         |         |         |         |         |         |
|---------|---------|---------|---------|---------|---------|---------|---------|---------|
| Mcam    | 2.25252 | 1.1E-08 | 3.21528 | 6.82989 | 6.04182 | 35.2559 | 29.9629 | 16.4014 |
| Fam20c  | 2.24901 | 5.2E-05 | 0.32911 | 0.55061 | 0.75182 | 3.20319 | 3.1227  | 1.86768 |
| Eng     | 2.24881 | 0.00036 | 2.4892  | 5.85899 | 6.74513 | 40.7288 | 25.6253 | 11.3622 |
| S100a11 | 2.24836 | 0.049   | 12.0126 | 25.4818 | 26.7165 | 163.1   | 120.392 | 31.7369 |
| C1ra    | 2.24736 | 0.02641 | 0.77705 | 1.77843 | 2.0236  | 13.2473 | 7.01084 | 2.55665 |
| Tmsb10  | 2.24568 | 0.00031 | 10.529  | 12.9746 | 10.5126 | 101.68  | 72.6664 | 28.6836 |
| Cdk2    | 2.24558 | 0.00975 | 0.57148 | 0.38244 | 0.75065 | 3.55856 | 3.4858  | 1.63977 |
| Arpc3   | 2.24434 | 0.00583 | 0.46126 | 1.65004 | 1.55182 | 11.2697 | 5.39263 | 2.31017 |
| Spcs1   | 2.24379 | 0.03043 | 0.52441 | 1.98531 | 1.1295  | 9.36127 | 6.89244 | 2.57951 |
| Fli1    | 2.23947 | 0.00154 | 1.0964  | 1.33403 | 1.02461 | 8.49099 | 7.29559 | 2.74556 |
| Hyal2   | 2.23842 | 0.00153 | 0.31654 | 0.73435 | 0.96414 | 5.16791 | 3.48616 | 1.69544 |
| Clp1    | 2.23504 | 0.02011 | 0.17338 | 0.45251 | 0.23764 | 1.76916 | 1.45416 | 0.82916 |
| Mis18a  | 2.23465 | 0.01137 | 0.16182 | 0.42232 | 0.24951 | 1.52413 | 1.39827 | 1.14529 |
| Gusb    | 2.23377 | 2.8E-05 | 0.96771 | 1.18613 | 1.58816 | 8.73098 | 7.98672 | 2.9813  |
| Chst3   | 2.23232 | 0.00379 | 0.39218 | 0.4581  | 0.35429 | 2.03727 | 2.91774 | 1.1867  |
| Tgfb2   | 2.23129 | 3.5E-06 | 1.7259  | 4.64646 | 4.32397 | 24.7662 | 21.7882 | 7.69625 |
| Gprc5a  | 2.23074 | 0.00136 | 3.28052 | 10.0465 | 12.2698 | 60.7507 | 49.4033 | 17.4859 |
| Tbx5    | 2.22733 | 0.00053 | 0.39639 | 1.01464 | 0.781   | 4.21579 | 4.40748 | 2.21788 |
| Bend4   | 2.2273  | 0.00715 | 0.07029 | 0.12231 | 0.15255 | 0.76507 | 0.73247 | 0.26893 |
| Vps29   | 2.22636 | 0.00601 | 0.26246 | 0.54197 | 0.71947 | 3.57863 | 3.62109 | 0.97543 |
| Cryab   | 2.2256  | 0.03711 | 1.56618 | 4.21337 | 2.68333 | 24.2421 | 16.2404 | 4.3741  |
| Fbln2   | 2.22448 | 0.04598 | 0.21818 | 0.96367 | 0.97191 | 4.81797 | 4.65795 | 1.23818 |
| Slfn5   | 2.22432 | 0.00047 | 1.22667 | 2.36712 | 2.20829 | 13.6117 | 10.4695 | 4.42683 |
| Blnk    | 2.22369 | 0.04027 | 0.21265 | 0.34154 | 0.33122 | 1.96656 | 2.00463 | 0.5769  |
| Macf1   | 2.22318 | 1E-07   | 4.63034 | 11.9916 | 12.3629 | 54.8669 | 54.795  | 29.7582 |
| Pou2f2  | 2.22068 | 0.01946 | 0.30911 | 0.24823 | 0.26962 | 1.46458 | 2.07117 | 0.78482 |
| Nid2    | 2.21981 | 0.00382 | 0.166   | 0.45704 | 0.26003 | 1.99536 | 1.61522 | 0.79838 |
| Tcn2    | 2.21957 | 0.02007 | 1.01036 | 2.00707 | 2.33236 | 17.2633 | 8.35227 | 2.88892 |
| Pip4k2a | 2.21946 | 2.5E-05 | 0.93268 | 1.23049 | 1.3012  | 7.59264 | 7.11129 | 2.98206 |
| Casp3   | 2.219   | 0.00272 | 0.41401 | 0.60953 | 0.56746 | 2.64301 | 3.96334 | 1.31994 |
| Abhd18  | 2.21791 | 0.04569 | 0       | 0.17075 | 0.16029 | 0.42725 | 0.6701  | 0.26031 |
| Axl     | 2.21529 | 4.4E-11 | 2.76144 | 6.85599 | 5.64584 | 28.0906 | 29.7105 | 16.4458 |
| Mef2a   | 2.21525 | 0.00026 | 0.50846 | 1.66879 | 1.68927 | 9.74495 | 8.20872 | 3.0448  |
| Arpc2   | 2.21515 | 2E-05   | 3.75999 | 8.00615 | 7.14474 | 45.1811 | 38.9773 | 13.6004 |
| Cap1    | 2.21412 | 0.00012 | 2.5524  | 5.98939 | 4.86142 | 34.7604 | 25.7962 | 8.85191 |
| Syng2   | 2.21331 | 0.01744 | 1.63034 | 4.13721 | 3.26251 | 20.8842 | 16.1432 | 5.38909 |
| Ism1    | 2.2132  | 4.4E-06 | 1.71873 | 4.01521 | 4.87213 | 22.5169 | 19.9944 | 9.92311 |
| Samhd1  | 2.2132  | 2.3E-07 | 1.46831 | 2.2566  | 2.48095 | 14.2114 | 12.0638 | 5.77244 |
| Brox    | 2.21276 | 0.00234 | 0.50859 | 0.94679 | 0.8872  | 5.2839  | 4.71206 | 1.53892 |
| Dennd2c | 2.21261 | 0.01523 | 0.08444 | 0.18987 | 0.11574 | 0.54083 | 0.79834 | 0.51689 |
| Plvap   | 2.21011 | 0.00057 | 2.27325 | 6.27235 | 6.35143 | 41.7618 | 27.1691 | 14.5397 |
| Cndp2   | 2.20982 | 1.6E-05 | 1.42109 | 2.94081 | 2.84679 | 16.9203 | 14.697  | 5.22773 |
| Tspan4  | 2.20913 | 0.00069 | 0.85083 | 2.47681 | 2.51457 | 14.9927 | 12.7041 | 4.15027 |
| Rel1    | 2.2089  | 9.4E-05 | 0.63076 | 0.98894 | 0.92629 | 5.94107 | 4.5039  | 2.3672  |
| Tmem140 | 2.20885 | 0.00728 | 0.3364  | 0.33371 | 0.62381 | 3.18092 | 2.4844  | 1.33241 |
| Entpd1  | 2.20872 | 5.2E-05 | 0.87176 | 1.95018 | 2.19058 | 12.9161 | 8.37703 | 4.06575 |
| Osmr    | 2.20641 | 0.00058 | 0.31553 | 1.37444 | 1.78889 | 7.87722 | 5.98288 | 2.69966 |
| H2-T23  | 2.20421 | 0.00011 | 5.69274 | 5.02227 | 5.35747 | 19.1822 | 16.6486 | 10.1535 |
| Tnfaip3 | 2.20365 | 4.3E-06 | 0.4007  | 0.68218 | 0.68103 | 3.52258 | 3.27516 | 1.88868 |
| Anxa1   | 2.2017  | 3.7E-05 | 3.46392 | 7.02558 | 7.36513 | 37.6737 | 40.3612 | 13.1164 |
| Plekhg1 | 2.19973 | 6.8E-06 | 0.34458 | 0.48958 | 0.58129 | 2.48829 | 2.76875 | 1.65295 |
| Nemp2   | 2.1981  | 0.02154 | 0.08182 | 0.09198 | 0.29156 | 0.68842 | 1.03969 | 0.56343 |
| Arl15   | 2.19547 | 0.00035 | 0.75744 | 1.52065 | 1.46288 | 5.90198 | 7.73518 | 4.37307 |
| Rpusd1  | 2.19516 | 0.04945 | 0.06801 | 0.32769 | 0.41947 | 1.7509  | 1.45191 | 0.93668 |
| Gypc    | 2.19285 | 0.03949 | 0.29812 | 0.43891 | 0.61292 | 3.27596 | 2.52558 | 1.02649 |
| Slc1a3  | 2.19276 | 0.02085 | 0.05427 | 0.22879 | 0.26033 | 1.31192 | 0.92407 | 0.45675 |



|               |         |         |         |         |         |         |         |         |
|---------------|---------|---------|---------|---------|---------|---------|---------|---------|
| Nt5e          | 2.19141 | 0.00225 | 0.77027 | 1.2715  | 0.90913 | 6.81179 | 6.89533 | 1.85001 |
| Gsap          | 2.19121 | 0.00088 | 0.32218 | 0.66021 | 0.68523 | 3.3625  | 3.28663 | 1.57264 |
| Lamp1         | 2.18996 | 0.00715 | 4.97914 | 14.9162 | 14.569  | 77.8103 | 57.3088 | 18.453  |
| Trps1         | 2.18971 | 1.1E-05 | 0.25103 | 0.7855  | 0.8661  | 3.92439 | 3.79716 | 1.56311 |
| Nrxn1         | 2.18958 | 0.03204 | 0.05463 | 0.10236 | 0.07072 | 0.23631 | 0.40418 | 0.25544 |
| Timp2         | 2.18934 | 0.00441 | 2.91332 | 11.1964 | 10.6143 | 53.742  | 46.9339 | 17.4921 |
| 4931406P16Rik | 2.18898 | 9E-07   | 0.88562 | 2.28034 | 1.90749 | 13.117  | 11.1183 | 4.3993  |
| Agpat4        | 2.18864 | 0.00098 | 0.4288  | 0.92974 | 1.0873  | 6.11213 | 4.25024 | 1.93581 |
| Strip2        | 2.18727 | 0.04041 | 0.12515 | 0.11167 | 0.12389 | 0.75966 | 0.53012 | 0.44688 |
| Tmco1         | 2.18649 | 0.02621 | 0.17018 | 0.52713 | 0.51649 | 3.14475 | 2.44679 | 0.61387 |
| Slc25a40      | 2.1848  | 0.01764 | 0.07175 | 0.13829 | 0.21636 | 0.81097 | 0.80236 | 0.49411 |
| Coro1a        | 2.18342 | 0.01855 | 3.62065 | 2.1389  | 2.13905 | 18.763  | 19.377  | 7.83351 |
| Ckap4         | 2.18305 | 3.2E-07 | 1.57475 | 3.58305 | 3.95709 | 18.7407 | 17.5909 | 8.37721 |
| Prim2         | 2.18145 | 0.04118 | 0.12977 | 0.28658 | 0.22233 | 1.5686  | 0.90698 | 0.64542 |
| Lpcat2        | 2.17942 | 0.02842 | 0.51278 | 0.54905 | 0.32799 | 2.83349 | 2.78023 | 1.30786 |
| Eif2s2        | 2.17682 | 0.00018 | 0.42864 | 1.18412 | 1.26903 | 4.68333 | 4.2356  | 2.19092 |
| Cmk1r1        | 2.1768  | 7.5E-06 | 1.25743 | 4.47577 | 3.40037 | 19.2485 | 16.238  | 8.21716 |
| Cfl1          | 2.17673 | 1.1E-05 | 7.67536 | 14.5005 | 15.7127 | 94.4143 | 68.3498 | 27.5951 |
| Ctps          | 2.17598 | 1.5E-07 | 1.36217 | 2.04754 | 2.27395 | 12.0187 | 9.35621 | 6.38731 |
| Ctsh          | 2.17506 | 9.2E-08 | 2.96033 | 8.84746 | 8.67978 | 36.2194 | 38.3943 | 21.1335 |
| Slc16a2       | 2.17494 | 0.00476 | 0.21735 | 0.82907 | 0.72614 | 4.69146 | 2.77578 | 1.30966 |
| Slc25a53      | 2.17462 | 0.02994 | 0.05818 | 0.07008 | 0.16945 | 0.45665 | 0.44359 | 0.52306 |
| Ap1s3         | 2.16818 | 0.03189 | 0.24146 | 0.29085 | 0.38611 | 1.97104 | 1.71827 | 0.92377 |
| Ifi207        | 2.16612 | 0.00224 | 0.99815 | 0.90844 | 1.14009 | 7.22875 | 4.95527 | 3.10592 |
| Ext1          | 2.16534 | 1.2E-07 | 0.67395 | 1.56607 | 1.36596 | 7.98665 | 6.82228 | 2.9734  |
| Gimap5        | 2.16458 | 0.03804 | 0.54144 | 0.23717 | 0.87705 | 2.65808 | 2.95232 | 1.77015 |
| Mfsd12        | 2.16113 | 0.00019 | 1.07915 | 1.75665 | 1.81892 | 6.02542 | 6.10803 | 3.74925 |
| Mtpap         | 2.15785 | 0.00239 | 0.3932  | 0.49118 | 0.77846 | 2.93539 | 3.70861 | 1.47088 |
| Smim13        | 2.15653 | 0.00191 | 0.20756 | 0.66673 | 0.51564 | 2.78588 | 2.88818 | 1.03232 |
| Map3k8        | 2.15514 | 0.00056 | 0.33429 | 0.64016 | 0.54631 | 2.77729 | 2.7841  | 1.67246 |
| Smc4          | 2.15372 | 4.6E-05 | 0.68914 | 1.46386 | 1.47777 | 7.32846 | 7.25439 | 3.1468  |
| Stard4        | 2.15187 | 0.00115 | 0.29027 | 0.49951 | 0.55416 | 2.52576 | 2.84555 | 1.17399 |
| Itgav         | 2.15175 | 1.4E-07 | 0.65757 | 1.55822 | 1.58096 | 7.52037 | 7.56166 | 3.25811 |
| Upk1b         | 2.15152 | 0.03565 | 0.26189 | 0.57835 | 0.76277 | 3.16558 | 3.5609  | 1.15222 |
| Slc39a8       | 2.15069 | 0.01334 | 0.52892 | 0.8495  | 1.22208 | 5.66513 | 5.89174 | 1.6651  |
| Flt3          | 2.15068 | 0.01561 | 0.16878 | 0.25601 | 0.44981 | 1.53083 | 1.52516 | 1.09054 |
| Zfp365        | 2.15009 | 0.01215 | 0.15576 | 0.39312 | 0.24399 | 1.64874 | 1.3912  | 0.74915 |
| Mgl2          | 2.14957 | 0.01622 | 0.94027 | 0.93275 | 1.74363 | 6.80723 | 7.2816  | 3.17409 |
| Lrrc32        | 2.14925 | 0.02302 | 0.29647 | 1.76574 | 1.37142 | 8.48576 | 5.02315 | 2.5331  |
| Sdk1          | 2.14913 | 0.00877 | 0.05223 | 0.21811 | 0.08591 | 0.69532 | 0.62657 | 0.26378 |
| Nlgn2         | 2.14889 | 0.00013 | 1.56161 | 2.55633 | 2.07179 | 9.76807 | 10.6447 | 8.70121 |
| Adam11        | 2.14628 | 0.03294 | 0.18387 | 0.34454 | 0.23802 | 1.30853 | 1.25656 | 1.00048 |
| Tcf7          | 2.14362 | 0.04526 | 0.35297 | 0.67321 | 0.75593 | 6.59384 | 5.31524 | 1.75553 |
| Nedd9         | 2.13897 | 6.1E-05 | 1.76973 | 2.52655 | 2.61095 | 16.0825 | 14.0057 | 5.22846 |
| Gja1          | 2.13805 | 0.00929 | 0.82062 | 2.06686 | 1.8661  | 11.6643 | 8.09599 | 3.53911 |
| Itgb1         | 2.13777 | 0.00082 | 5.53412 | 15.6116 | 14.237  | 84.3097 | 64.3675 | 23.3006 |
| Ttpal         | 2.13696 | 2.9E-05 | 0.7201  | 1.32847 | 1.00033 | 6.41594 | 5.97518 | 2.56137 |
| Rcan1         | 2.13683 | 0.00038 | 1.71002 | 2.93204 | 2.5972  | 16.0775 | 12.0985 | 7.1434  |
| Ctsl          | 2.1367  | 0.0007  | 2.2917  | 5.757   | 5.75867 | 31.8431 | 26.3741 | 9.48703 |
| Robo4         | 2.13573 | 3.5E-06 | 0.56796 | 1.05253 | 1.39225 | 5.88449 | 4.58579 | 3.6772  |
| Manbal        | 2.13573 | 0.00386 | 0.52312 | 1.59635 | 1.29062 | 5.9127  | 7.76442 | 2.56175 |
| Slc25a24      | 2.13536 | 0.00088 | 0.60762 | 1.00301 | 1.13357 | 5.19322 | 5.86826 | 2.29881 |
| Rps7          | 2.13523 | 0.00127 | 9.15948 | 17.1306 | 16.9318 | 102.77  | 85.7647 | 27.9418 |
| Megf11        | 2.13499 | 0.00033 | 0.1761  | 0.24955 | 0.26266 | 1.21633 | 1.23735 | 0.72127 |
| Wipf3         | 2.13481 | 0.00298 | 0.11396 | 0.353   | 0.24546 | 1.60501 | 1.62198 | 0.59795 |
| Med22         | 2.13407 | 0.00011 | 0.41662 | 0.7206  | 1.62523 | 5.15161 | 5.115   | 2.94258 |

|          |         |         |         |         |         |         |         |         |
|----------|---------|---------|---------|---------|---------|---------|---------|---------|
| Lactb    | 2.12922 | 0.01057 | 0.22754 | 0.68523 | 0.62376 | 3.53629 | 2.6602  | 1.21875 |
| Ptprd    | 2.12871 | 0.00012 | 0.20807 | 0.5135  | 0.58429 | 2.84888 | 2.36806 | 1.05233 |
| Man2a2   | 2.12663 | 6.7E-09 | 0.72969 | 1.92021 | 2.03106 | 8.27572 | 8.91316 | 5.26552 |
| Rab5c    | 2.12616 | 0.00726 | 1.90041 | 4.87511 | 3.65391 | 26.3193 | 20.6345 | 5.41256 |
| Gucy1a2  | 2.12598 | 0.01077 | 0.06545 | 0.36793 | 0.47099 | 1.82894 | 1.77995 | 0.77628 |
| Slc33a1  | 2.12311 | 0.04526 | 0.35908 | 0.89129 | 0.87248 | 4.14056 | 2.97012 | 1.49866 |
| Dennd4a  | 2.12257 | 6.8E-07 | 0.49409 | 0.92768 | 0.77737 | 4.36104 | 4.25891 | 1.9968  |
| Tmem55a  | 2.12106 | 0.01589 | 0.24758 | 0.83505 | 0.47508 | 3.0471  | 2.96999 | 1.32609 |
| Actr3    | 2.12071 | 6.4E-06 | 3.02615 | 5.08123 | 6.22163 | 30.4034 | 27.4843 | 11.5201 |
| Cyth4    | 2.12032 | 0.00191 | 2.32385 | 3.06585 | 2.27511 | 13.0287 | 15.5036 | 8.92239 |
| Rftn1    | 2.11873 | 0.00398 | 1.00287 | 0.90861 | 1.07499 | 5.53843 | 6.01261 | 3.24653 |
| Slc30a4  | 2.11822 | 0.02609 | 0.42254 | 0.66168 | 0.66603 | 2.9186  | 3.45797 | 1.1801  |
| Picalm   | 2.11822 | 6E-05   | 1.21185 | 2.63723 | 2.51052 | 14.795  | 11.5203 | 4.79202 |
| Skp2     | 2.11805 | 0.01789 | 0.10295 | 0.1063  | 0.17134 | 0.58181 | 0.69524 | 0.40512 |
| Leprot   | 2.11791 | 0.00194 | 1.09839 | 3.43024 | 3.2619  | 16.3232 | 15.6639 | 5.55629 |
| Eif3e    | 2.11701 | 0.00265 | 1.65349 | 3.9835  | 3.70854 | 18.8305 | 18.032  | 7.30358 |
| Psmd14   | 2.11661 | 0.00279 | 0.57499 | 0.62665 | 0.95698 | 4.40999 | 4.42579 | 1.63414 |
| Nfya     | 2.11586 | 0.00067 | 0.3325  | 0.80103 | 0.86806 | 4.4441  | 3.58137 | 1.59917 |
| Pappa2   | 2.11558 | 0.01254 | 0.01125 | 0.10842 | 0.16963 | 0.59345 | 0.59478 | 0.22383 |
| Nek6     | 2.11526 | 0.00192 | 0.36754 | 0.58163 | 0.47413 | 3.29216 | 3.02214 | 1.16628 |
| Atp7a    | 2.11356 | 0.00055 | 0.25195 | 0.92647 | 0.8179  | 4.03017 | 3.86229 | 1.51185 |
| Naa20    | 2.11152 | 0.01804 | 0.34386 | 0.7029  | 0.36419 | 2.82661 | 2.68536 | 1.10028 |
| Sh3bgrl  | 2.11111 | 0.00857 | 1.7559  | 4.79426 | 4.9578  | 24.2788 | 23.4914 | 7.4164  |
| Jak2     | 2.11054 | 1.4E-06 | 1.03616 | 2.92154 | 2.28809 | 12.7958 | 11.1774 | 5.4617  |
| Peg3     | 2.11007 | 0.00039 | 0.2347  | 0.68409 | 0.60763 | 2.93656 | 2.33294 | 1.6894  |
| Kirrel   | 2.10809 | 2.3E-05 | 0.35694 | 1.15902 | 0.89338 | 4.95041 | 4.6384  | 1.84057 |
| Mbnl1    | 2.10661 | 0.00511 | 0.94267 | 2.2537  | 2.00713 | 11.197  | 11.2402 | 3.10544 |
| Mfge8    | 2.10514 | 4.6E-05 | 1.28304 | 3.42789 | 3.38189 | 17.1822 | 14.3353 | 6.6456  |
| Inpp4b   | 2.10445 | 0.00244 | 0.19501 | 0.23491 | 0.28551 | 1.39708 | 1.49138 | 0.59008 |
| Slc36a1  | 2.1042  | 3.5E-06 | 0.51466 | 1.1407  | 1.05812 | 5.33877 | 5.11697 | 2.3943  |
| B3gnt3   | 2.10399 | 0.00166 | 0.64449 | 0.94379 | 0.8314  | 5.30866 | 4.49002 | 1.82753 |
| Alg13    | 2.10309 | 0.025   | 0.01691 | 0.14936 | 0.15063 | 0.57332 | 0.67036 | 0.27168 |
| Mmrn2    | 2.10274 | 0.01329 | 0.32376 | 1.22908 | 0.66564 | 4.23235 | 4.38356 | 1.75665 |
| Rnasel   | 2.10235 | 0.00084 | 0.38368 | 0.46217 | 0.49003 | 2.31068 | 2.69491 | 1.30776 |
| Zfp639   | 2.10224 | 0.00077 | 0.12693 | 0.37373 | 0.39143 | 1.64713 | 1.62367 | 0.92263 |
| Cd151    | 2.1018  | 0.00107 | 1.35214 | 3.4611  | 2.83785 | 18.5729 | 12.8654 | 5.10837 |
| Rgs4     | 2.10164 | 0.00247 | 0.29908 | 0.75055 | 0.743   | 3.59171 | 2.98347 | 1.83077 |
| Mdfic    | 2.10153 | 3.2E-05 | 0.62377 | 0.80147 | 1.19695 | 5.55214 | 4.79563 | 2.36258 |
| Fndc3b   | 2.1009  | 3.5E-06 | 0.82692 | 1.78162 | 2.14932 | 10.6446 | 8.35014 | 3.75779 |
| Rps25    | 2.10051 | 0.01291 | 2.03787 | 5.10437 | 5.48661 | 28.3349 | 20.3472 | 6.60849 |
| Zfp738   | 2.09965 | 0.0038  | 0.1776  | 0.55267 | 0.44121 | 2.10498 | 2.01993 | 1.05319 |
| Ass1     | 2.09962 | 0.0183  | 0.52776 | 1.19439 | 1.34809 | 6.32664 | 4.60923 | 2.12924 |
| Id3      | 2.09612 | 7.2E-06 | 1.74602 | 5.03732 | 4.34313 | 18.5166 | 17.783  | 13.6073 |
| Chsy1    | 2.09443 | 0.00347 | 1.6086  | 3.16265 | 3.44026 | 8.30709 | 6.83731 | 4.07451 |
| Il1r1    | 2.09212 | 1.1E-05 | 0.67347 | 1.46171 | 1.52185 | 7.30348 | 6.48575 | 3.38438 |
| Brcc3    | 2.09131 | 0.00918 | 0.08811 | 0.24765 | 0.24153 | 0.97743 | 1.21669 | 0.50563 |
| Slc2a9   | 2.09115 | 0.02645 | 0.06836 | 0.14638 | 0.26546 | 0.71539 | 1.00763 | 0.54048 |
| Tmem30a  | 2.09072 | 0.00089 | 1.18978 | 2.784   | 3.16311 | 14.4525 | 13.5239 | 5.65062 |
| Zfp46    | 2.0888  | 6E-05   | 0.66665 | 1.01717 | 1.03556 | 4.57678 | 5.29752 | 2.82253 |
| Mcm2     | 2.08848 | 0.00037 | 0.26079 | 0.55847 | 0.69503 | 3.0204  | 2.63647 | 1.46334 |
| Itgb5    | 2.08813 | 2.1E-05 | 1.86027 | 6.25222 | 5.80778 | 27.4724 | 25.846  | 10.9128 |
| Plscr4   | 2.08808 | 0.01511 | 0.19357 | 0.41452 | 0.79594 | 2.43096 | 2.96816 | 1.23427 |
| Fkbp14   | 2.08708 | 0.0089  | 0.25123 | 0.40351 | 0.72696 | 2.82211 | 2.45475 | 1.06797 |
| Serpinh1 | 2.08681 | 0.04606 | 3.12897 | 18.2743 | 13.061  | 86.8964 | 55.2084 | 16.07   |
| Slc36a2  | 2.08658 | 0.02002 | 0.14233 | 0.71435 | 0.43893 | 3.1727  | 2.38741 | 0.65342 |
| Rap1gds1 | 2.08483 | 0.0001  | 0.44434 | 0.81209 | 1.01854 | 5.01262 | 4.08104 | 1.80547 |

|          |         |         |         |         |         |         |         |         |
|----------|---------|---------|---------|---------|---------|---------|---------|---------|
| Narf     | 2.08331 | 0.00612 | 0.16869 | 0.56123 | 0.49546 | 2.79949 | 2.20492 | 0.82978 |
| Efemp2   | 2.08323 | 1.9E-05 | 0.61234 | 1.79133 | 1.82846 | 8.70627 | 7.35892 | 3.7483  |
| Rplp0    | 2.08205 | 0.00015 | 13.6833 | 27.2467 | 26.8404 | 153.957 | 129.418 | 43.8562 |
| Csf1     | 2.0798  | 2.3E-05 | 0.54828 | 1.30328 | 1.26251 | 6.65154 | 5.16141 | 2.76887 |
| Dpagt1   | 2.07977 | 0.01135 | 0.20289 | 0.70605 | 0.90381 | 3.84334 | 2.16578 | 1.16436 |
| Ednra    | 2.07936 | 0.03992 | 0.40186 | 1.08703 | 1.40599 | 6.79982 | 7.10627 | 2.86447 |
| Apbb2    | 2.07537 | 2.3E-05 | 0.68651 | 0.9669  | 1.02057 | 5.42495 | 4.62231 | 2.68302 |
| Zdhhc20  | 2.07533 | 0.02328 | 0.38062 | 0.93494 | 1.16612 | 5.04711 | 5.25779 | 1.4733  |
| Gm9938   | 2.07489 | 0.01729 | 0.39574 | 0.74153 | 1.31083 | 4.76282 | 4.62656 | 2.17009 |
| Rap1a    | 2.07452 | 0.00332 | 0.97738 | 2.46168 | 2.67926 | 11.326  | 11.8781 | 4.0792  |
| H1f0     | 2.07152 | 0.0028  | 1.82313 | 1.87075 | 2.04766 | 8.87215 | 13.4372 | 5.34746 |
| Hmcn1    | 2.06864 | 3.5E-05 | 0.6012  | 1.9268  | 1.90651 | 6.83642 | 7.86488 | 4.32418 |
| Pot1a    | 2.06855 | 0.04528 | 0.16032 | 0.08583 | 0.16481 | 0.74664 | 0.72664 | 0.41913 |
| Lamc1    | 2.06828 | 0.00012 | 1.79217 | 5.36329 | 4.70173 | 25.4436 | 20.9665 | 8.49566 |
| Nod2     | 2.06802 | 0.04496 | 0.23099 | 0.20405 | 0.17413 | 1.18938 | 0.83364 | 0.70698 |
| Col3a1   | 2.06695 | 0.00044 | 12.212  | 28.5677 | 29.4657 | 133.028 | 116.975 | 68.1988 |
| Cpne8    | 2.06676 | 0.00191 | 0.44503 | 0.53607 | 0.59091 | 2.61982 | 2.55901 | 1.63876 |
| Wdr75    | 2.06675 | 0.04881 | 0.23637 | 0.47453 | 0.27538 | 2.256   | 1.63398 | 0.7596  |
| Rarres2  | 2.06588 | 0.02304 | 0.56689 | 0.73538 | 1.61376 | 5.75019 | 4.7434  | 2.10207 |
| Sesn2    | 2.06571 | 0.00011 | 0.49994 | 1.12413 | 1.23342 | 5.77624 | 4.35394 | 3.00927 |
| Mfap3    | 2.06537 | 0.00083 | 0.35938 | 1.21852 | 0.83464 | 5.07742 | 4.6683  | 1.57351 |
| Nck1     | 2.06461 | 0.00791 | 0.43505 | 0.89282 | 0.67911 | 4.49227 | 3.88217 | 1.29454 |
| Myo1f    | 2.06433 | 0.01434 | 1.43772 | 1.09778 | 1.14682 | 6.73391 | 8.23049 | 3.7872  |
| Rps6ka3  | 2.06418 | 0.00713 | 0.52885 | 1.43056 | 1.64049 | 7.81269 | 7.30763 | 1.95941 |
| Arhgap19 | 2.06371 | 0.00337 | 0.38306 | 0.83237 | 0.55592 | 2.94301 | 2.87485 | 2.12069 |
| Lrp1     | 2.06356 | 3E-06   | 3.35357 | 9.93765 | 9.74858 | 49.2504 | 37.8675 | 17.7271 |
| Lyn      | 2.06337 | 5.8E-07 | 1.62084 | 2.80876 | 3.33238 | 15.6416 | 13.7024 | 6.44038 |
| Cep170   | 2.06208 | 3.4E-05 | 0.48295 | 0.90787 | 0.85752 | 5.05196 | 3.97236 | 1.85606 |
| Zfp945   | 2.0602  | 0.02424 | 0.11385 | 0.16457 | 0.39792 | 1.18673 | 1.45833 | 0.5401  |
| Tram2    | 2.05932 | 0.00086 | 0.71289 | 0.96346 | 1.22736 | 5.67747 | 5.6211  | 2.55444 |
| Nudcd2   | 2.05775 | 0.00105 | 0.39471 | 1.04148 | 1.12065 | 4.21345 | 4.95849 | 2.54558 |
| Cd244    | 2.05667 | 0.04688 | 0.19002 | 0.17167 | 0.30929 | 1.34236 | 1.32811 | 0.47255 |
| Tcf4     | 2.05269 | 7.2E-07 | 0.78393 | 1.71646 | 1.41445 | 7.11841 | 7.13205 | 3.73958 |
| Clptm1   | 2.0501  | 0.00046 | 0.78332 | 1.09334 | 1.07364 | 6.38258 | 5.44157 | 2.35465 |
| Slc2a13  | 2.04933 | 0.03637 | 0.06921 | 0.13339 | 0.18973 | 0.80836 | 0.74583 | 0.28598 |
| Msn      | 2.04298 | 4.8E-05 | 6.79136 | 13.2743 | 12.382  | 74.347  | 57.9036 | 23.4052 |
| Mmp2     | 2.04279 | 0.0006  | 2.40503 | 7.11843 | 5.58036 | 32.5121 | 25.3229 | 11.3832 |
| Asah2    | 2.03946 | 0.00946 | 0.27211 | 0.55622 | 0.44077 | 2.64064 | 2.28846 | 0.9464  |
| Fem1c    | 2.03923 | 5.8E-05 | 0.5259  | 1.33194 | 1.42777 | 6.42673 | 6.33335 | 2.46082 |
| Zfp280c  | 2.03805 | 0.00739 | 0.13272 | 0.31974 | 0.3335  | 1.44452 | 1.60783 | 0.55853 |
| Ston1    | 2.03748 | 9.9E-05 | 0.40989 | 1.5018  | 1.10606 | 6.20932 | 4.81805 | 2.62667 |
| Slc37a2  | 2.0374  | 0.03707 | 0.26152 | 0.23802 | 0.35845 | 1.69691 | 1.74585 | 0.61366 |
| Bud31    | 2.03731 | 0.0257  | 0.43189 | 1.04049 | 1.33193 | 5.83075 | 4.97607 | 1.59726 |
| Rap1b    | 2.03465 | 0.00359 | 3.31893 | 7.9039  | 6.27454 | 38.9143 | 32.3443 | 11.4278 |
| Slc39a13 | 2.0319  | 0.00278 | 0.26166 | 1.24164 | 0.9618  | 4.09262 | 3.76032 | 2.09311 |
| Plxdc2   | 2.02867 | 0.01096 | 0.68354 | 2.27601 | 1.99946 | 10.5629 | 8.97434 | 3.08711 |
| Spns2    | 2.0282  | 0.00084 | 0.93608 | 1.48067 | 1.53575 | 5.64639 | 6.54607 | 5.16573 |
| Pla2r1   | 2.02796 | 0.00111 | 0.12042 | 0.38681 | 0.43738 | 1.88281 | 1.49963 | 0.91219 |
| Uhrf1    | 2.02733 | 0.04173 | 0.27194 | 0.50228 | 0.67091 | 2.49308 | 2.64016 | 1.41493 |
| Nav1     | 2.02659 | 1.8E-07 | 0.71394 | 1.38092 | 1.49413 | 6.48833 | 6.04439 | 3.50089 |
| Capns1   | 2.02557 | 0.04292 | 2.01059 | 4.994   | 2.98009 | 26.6301 | 17.9442 | 4.32906 |
| Hsd17b7  | 2.0255  | 0.00978 | 0.15884 | 0.29156 | 0.34212 | 1.52463 | 1.40719 | 0.67716 |
| Arhgdia  | 2.02532 | 3.7E-05 | 5.38575 | 11.7805 | 13.4983 | 68.9579 | 53.6829 | 20.5264 |
| Esyt1    | 2.0252  | 2.4E-06 | 2.79574 | 5.42361 | 5.48959 | 26.8063 | 21.8752 | 11.5373 |
| Pcna     | 2.02515 | 0.01853 | 0.5791  | 1.43388 | 1.88511 | 9.3938  | 7.62874 | 2.28936 |
| Mtmr2    | 2.02512 | 0.00589 | 0.40076 | 1.1548  | 0.90472 | 4.95894 | 4.79311 | 1.55127 |



|          |          |         |         |         |         |         |         |         |
|----------|----------|---------|---------|---------|---------|---------|---------|---------|
| Ebf1     | 2.0225   | 0.02959 | 0.35615 | 0.44807 | 0.29289 | 1.93072 | 2.22065 | 1.03554 |
| Golga7   | 2.02046  | 0.00108 | 0.25829 | 0.95415 | 1.05028 | 3.96826 | 3.86874 | 1.79191 |
| Vwf      | 2.01932  | 9.1E-05 | 1.93224 | 6.49046 | 6.8137  | 26.7472 | 24.7374 | 13.6263 |
| Birc3    | 2.0182   | 0.00023 | 1.10987 | 1.29978 | 1.25184 | 6.41745 | 6.19389 | 3.27307 |
| Papss2   | 2.01787  | 0.02328 | 0.22304 | 0.94672 | 0.48039 | 3.68133 | 3.04479 | 0.87767 |
| Fgd3     | 2.01732  | 0.01306 | 0.50088 | 0.57241 | 0.38287 | 2.50405 | 2.76143 | 1.42984 |
| Coro1b   | 2.01342  | 0.00033 | 2.09959 | 3.33294 | 3.37971 | 19.316  | 16.8771 | 5.71625 |
| Rnd3     | 2.01222  | 0.00048 | 0.33972 | 1.21717 | 0.87754 | 4.87358 | 4.17094 | 1.91958 |
| Hip1     | 2.01115  | 1.1E-06 | 0.86855 | 1.66143 | 1.65193 | 8.00307 | 7.33163 | 3.73359 |
| Rnf115   | 2.01072  | 0.04084 | 0.36031 | 0.73944 | 1.07001 | 4.85177 | 4.06992 | 1.25594 |
| Rraga    | 2.01058  | 0.0109  | 0.85898 | 1.83948 | 1.61886 | 8.18058 | 8.36861 | 3.17676 |
| Raph1    | 2.00929  | 2.1E-05 | 0.58369 | 1.64056 | 1.89636 | 8.19909 | 6.26349 | 3.68046 |
| Mpp1     | 2.00891  | 0.01172 | 0.23844 | 0.6963  | 0.5348  | 3.14426 | 2.77664 | 0.86249 |
| Hspa13   | 2.0079   | 0.0362  | 0.1965  | 0.71011 | 0.53867 | 3.14645 | 2.47711 | 0.94725 |
| Plscr3   | 2.00788  | 1.5E-05 | 1.43486 | 2.51135 | 2.26924 | 10.2574 | 11.3516 | 6.53112 |
| Rps13    | 2.00773  | 0.03287 | 2.53933 | 4.38948 | 3.80495 | 24.3232 | 17.5892 | 5.20329 |
| Nlrp3    | 2.00671  | 0.04782 | 0.11419 | 0.32096 | 0.23477 | 1.11142 | 1.24795 | 0.61163 |
| Slc43a2  | 2.00574  | 1.5E-05 | 0.73814 | 1.14848 | 1.46226 | 6.15587 | 6.1146  | 3.02697 |
| Bcl2     | 2.00524  | 4.5E-05 | 0.26561 | 0.68053 | 0.87547 | 3.13715 | 3.42671 | 1.82912 |
| Fkbp3    | 2.00521  | 0.03312 | 0       | 1.17857 | 1.17341 | 5.29895 | 4.84896 | 1.68445 |
| Rhoc     | 2.00453  | 0.00123 | 2.79169 | 4.36876 | 4.75845 | 28.8568 | 18.6292 | 8.7087  |
| Stx12    | 2.00309  | 0.00024 | 1.05356 | 2.0714  | 2.21587 | 9.74093 | 9.25174 | 4.97587 |
| Tmem106a | 2.0021   | 0.02114 | 0.47981 | 0.77063 | 0.63235 | 3.91674 | 3.37694 | 1.32733 |
| Plxna3   | -2.0006  | 0.00239 | 0.30866 | 0.7436  | 0.49356 | 0.65527 | 0.67239 | 0.37113 |
| Safb     | -2.00112 | 0.00813 | 6.19122 | 12.0971 | 10.3371 | 11.2296 | 8.75954 | 10.8173 |
| Il17rc   | -2.00202 | 0.00514 | 1.43094 | 3.44734 | 3.80372 | 3.07677 | 2.82124 | 3.15199 |
| Kiz      | -2.00229 | 0.00022 | 1.47443 | 4.04208 | 3.03136 | 3.86298 | 2.99784 | 2.45088 |
| Clec3b   | -2.00271 | 0.02772 | 1.9848  | 7.12566 | 8.24135 | 9.01747 | 5.99396 | 3.75208 |
| Fuom     | -2.00275 | 0.03435 | 0.31857 | 0.59694 | 0.50942 | 0.51122 | 0.68371 | 0.3521  |
| Nudc     | -2.00402 | 4.8E-05 | 5.68936 | 16.4478 | 14.0365 | 19.5468 | 12.0221 | 7.83592 |
| Echdc2   | -2.00439 | 0.00603 | 1.87377 | 3.33481 | 3.71356 | 3.08458 | 3.11475 | 3.29372 |
| Gpam     | -2.0068  | 8.8E-07 | 2.53883 | 6.40769 | 7.24962 | 6.8513  | 6.08378 | 4.41715 |
| Ncs1     | -2.00835 | 0.00215 | 0.72185 | 1.51916 | 1.46703 | 1.4067  | 1.36645 | 1.21894 |
| Cplx2    | -2.00861 | 0.0009  | 0.51705 | 1.5665  | 1.27242 | 1.03304 | 1.54107 | 0.98907 |
| BC022687 | -2.01011 | 0.03363 | 1.39104 | 2.18558 | 1.94806 | 1.48111 | 2.1827  | 2.2213  |
| Dnaaf5   | -2.0103  | 0.00088 | 1.02174 | 3.25557 | 2.84604 | 2.46284 | 2.61353 | 2.06798 |
| Arhgap33 | -2.01127 | 0.03013 | 0.36899 | 0.90638 | 0.80325 | 0.59969 | 0.79437 | 0.78058 |
| Scit1    | -2.01147 | 0.00037 | 0.44087 | 1.15392 | 1.37641 | 0.97406 | 1.31969 | 0.87459 |
| Galnt15  | -2.01198 | 0.00324 | 0.53094 | 1.63199 | 1.55584 | 1.49453 | 1.59137 | 0.89657 |
| Nipal3   | -2.01316 | 2.7E-06 | 1.57214 | 3.15013 | 2.43726 | 3.48871 | 2.5603  | 1.93872 |
| Cc2d2a   | -2.01318 | 5.6E-05 | 1.02058 | 1.89869 | 1.7369  | 1.53805 | 1.96267 | 1.50976 |
| Met      | -2.01355 | 5E-05   | 0.75413 | 1.67147 | 1.97425 | 2.29193 | 1.70197 | 0.90017 |
| Armc9    | -2.01929 | 0.00261 | 0.32949 | 0.72942 | 0.72623 | 0.65983 | 0.80119 | 0.53829 |
| Jph2     | -2.02117 | 0.00399 | 2.3681  | 5.11493 | 3.48831 | 4.37554 | 3.69416 | 3.60314 |
| Cetn2    | -2.02235 | 0.00039 | 1.97019 | 4.68999 | 4.33996 | 4.02071 | 4.61385 | 3.17656 |
| Mmaa     | -2.02382 | 0.00168 | 0.26921 | 0.52504 | 0.51395 | 0.54336 | 0.62556 | 0.25013 |
| Nr6a1    | -2.0266  | 0.00401 | 0.26751 | 0.56713 | 0.53531 | 0.51736 | 0.5439  | 0.40937 |
| Filip1   | -2.02743 | 0.00397 | 1.04526 | 2.15323 | 1.61954 | 1.68368 | 1.77873 | 1.63436 |
| Nacad    | -2.03032 | 0.00288 | 0.4735  | 0.79852 | 0.68145 | 0.69872 | 0.79426 | 0.61592 |
| Bok      | -2.03036 | 0.00341 | 1.13301 | 3.33618 | 3.58041 | 2.88533 | 3.03955 | 2.55266 |
| Slc16a12 | -2.03182 | 0.0025  | 0.48603 | 1.42348 | 1.58707 | 1.14897 | 1.67124 | 0.89692 |
| Nek4     | -2.03218 | 0.00681 | 0.42055 | 1.65484 | 1.52751 | 1.58445 | 1.38948 | 0.90101 |
| Jag1     | -2.03245 | 4E-06   | 1.94788 | 5.04389 | 6.21144 | 5.17958 | 4.53634 | 3.90861 |
| Rdm1     | -2.03245 | 0.00491 | 0.95597 | 1.77159 | 1.91503 | 1.84702 | 1.7568  | 1.46294 |
| Fuz      | -2.03364 | 0.00233 | 0.76395 | 1.85906 | 1.53891 | 1.39551 | 1.70624 | 1.27537 |
| Slc16a13 | -2.03408 | 0.01368 | 0.40076 | 1.03701 | 0.97652 | 1.06251 | 0.95063 | 0.61329 |

|               |          |         |         |         |         |         |         |         |
|---------------|----------|---------|---------|---------|---------|---------|---------|---------|
| Lztf11        | -2.03468 | 0.0442  | 0.59159 | 0.99863 | 1.09217 | 1.1296  | 1.27648 | 0.81295 |
| Azin2         | -2.03807 | 0.0013  | 0.92103 | 1.64106 | 1.77524 | 1.30126 | 1.78487 | 1.49756 |
| Slc2a12       | -2.03847 | 0.00638 | 0.51937 | 0.81221 | 0.843   | 1.04704 | 0.70862 | 0.56473 |
| Grtp1         | -2.03873 | 0.00262 | 0.62253 | 0.81806 | 1.18293 | 1.2971  | 1.16506 | 0.73616 |
| Syde2         | -2.04151 | 0.00022 | 0.70486 | 1.32615 | 1.38016 | 1.63131 | 1.13628 | 0.95539 |
| Ring1         | -2.04158 | 0.0019  | 1.5714  | 2.6959  | 2.81464 | 2.57894 | 2.48701 | 2.43208 |
| Otud1         | -2.04343 | 0.00057 | 0.94062 | 3.18568 | 3.30721 | 3.15866 | 2.39061 | 2.22177 |
| Tbcel         | -2.04388 | 2E-07   | 2.50149 | 5.72515 | 5.12867 | 4.9479  | 5.07548 | 3.98761 |
| Itgb4         | -2.04391 | 0.00019 | 1.25478 | 3.43396 | 3.85833 | 3.01687 | 2.68551 | 2.7919  |
| Slc35e3       | -2.04682 | 0.00089 | 1.33049 | 3.89985 | 3.16854 | 3.11206 | 3.02641 | 2.72326 |
| Greb1l        | -2.04688 | 0.04054 | 0.05363 | 0.25841 | 0.16907 | 0.229   | 0.19627 | 0.09028 |
| Ankrd54       | -2.0486  | 0.00017 | 0.94934 | 1.65542 | 2.23062 | 1.83945 | 1.77855 | 1.53581 |
| Spata7        | -2.04865 | 0.01641 | 0.17465 | 0.52094 | 0.46167 | 0.50134 | 0.4312  | 0.32455 |
| Rmdn2         | -2.05094 | 0.02924 | 0.25709 | 1.0839  | 1.4976  | 1.57399 | 1.01277 | 0.54097 |
| Pacsin3       | -2.05171 | 0.00421 | 0.7227  | 1.63362 | 1.22902 | 1.31099 | 1.18369 | 1.24933 |
| Hdc           | -2.05363 | 0.00087 | 0.70699 | 2.11085 | 2.0747  | 2.49289 | 1.66782 | 1.05418 |
| Agbl3         | -2.0601  | 0.00676 | 0.24805 | 0.3569  | 0.36832 | 0.28556 | 0.373   | 0.37169 |
| Dnal4         | -2.06402 | 0.00135 | 1.33638 | 2.42458 | 2.34048 | 2.05125 | 2.59134 | 1.81786 |
| Scrn3         | -2.06429 | 8.2E-05 | 0.45702 | 1.12035 | 1.08798 | 1.31406 | 1.06372 | 0.49694 |
| Mipep         | -2.06483 | 0.00018 | 1.20494 | 2.36102 | 2.01488 | 2.60277 | 1.95993 | 1.43829 |
| Zcchc3        | -2.06627 | 0.0026  | 0.86685 | 1.69492 | 1.26563 | 1.44364 | 1.37935 | 1.26889 |
| Eps8l1        | -2.06628 | 0.02327 | 1.51586 | 2.77362 | 3.87923 | 2.85555 | 1.71659 | 3.23004 |
| Pttg1         | -2.07159 | 0.00013 | 1.38983 | 2.92977 | 2.69868 | 2.65451 | 2.973   | 1.81672 |
| Tob1          | -2.07181 | 2.5E-06 | 2.73349 | 7.84557 | 6.76474 | 8.42327 | 5.68644 | 4.18314 |
| lfrd2         | -2.07218 | 0.00021 | 1.53723 | 2.43367 | 2.04678 | 2.17875 | 2.52274 | 1.71394 |
| Lym4          | -2.07306 | 0.04588 | 0.30579 | 1.10505 | 1.205   | 1.05609 | 1.20463 | 0.52646 |
| Whrn          | -2.07365 | 0.02002 | 0.25257 | 0.60848 | 0.51927 | 0.61456 | 0.42527 | 0.41067 |
| 1700112E06Rik | -2.07395 | 0.03163 | 0.46942 | 0.82248 | 1.14058 | 0.72351 | 1.01951 | 0.81633 |
| Syne1         | -2.08101 | 4.8E-07 | 4.92325 | 10.2772 | 8.54049 | 8.04472 | 8.25317 | 7.78302 |
| Ppm1l         | -2.08183 | 0.00962 | 0.1987  | 0.91986 | 0.82505 | 0.81467 | 0.79612 | 0.38457 |
| Trim65        | -2.08357 | 0.00198 | 0.68905 | 1.80231 | 1.38967 | 2.64549 | 1.47103 | 1.20511 |
| Cdpf1         | -2.08404 | 0.04698 | 1.04857 | 2.21996 | 1.43721 | 2.63371 | 1.40516 | 1.02114 |
| 1110051M20Rik | -2.08667 | 0.00048 | 0.37849 | 1.09064 | 1.20539 | 1.41202 | 1.36936 | 0.74958 |
| Prkaa2        | -2.08826 | 0.00173 | 0.45055 | 1.72735 | 1.47411 | 1.47844 | 1.34453 | 0.87853 |
| Nav2          | -2.08948 | 4.2E-08 | 1.06576 | 2.18392 | 2.04949 | 2.17786 | 1.88205 | 1.46928 |
| Tspyl2        | -2.09401 | 2.1E-05 | 3.03923 | 4.84832 | 4.53158 | 4.56473 | 4.63455 | 3.86536 |
| Naa16         | -2.09723 | 1.2E-05 | 0.90469 | 1.80114 | 1.30458 | 1.60956 | 1.47538 | 1.12488 |
| Acaa1a        | -2.09915 | 1.1E-05 | 2.83382 | 6.40567 | 6.49154 | 6.60698 | 6.06852 | 4.89883 |
| Kcnq1         | -2.09931 | 0.00028 | 0.9338  | 1.34071 | 1.5126  | 1.58139 | 1.48149 | 0.97433 |
| Nt5dc3        | -2.1049  | 1.7E-07 | 1.0897  | 2.48461 | 2.05367 | 2.26048 | 2.12657 | 1.45914 |
| Ttc8          | -2.1054  | 0.00118 | 0.6741  | 1.21801 | 1.35705 | 1.21695 | 1.41343 | 0.7737  |
| Mib2          | -2.10684 | 0.00019 | 2.30462 | 4.44961 | 4.70458 | 3.87955 | 3.76358 | 3.84573 |
| Rhobtb1       | -2.10873 | 0.00013 | 0.7054  | 1.77597 | 1.5548  | 1.52037 | 1.25011 | 1.3129  |
| Ears2         | -2.10909 | 0.00045 | 0.29225 | 0.64991 | 0.77031 | 0.71992 | 0.71989 | 0.36123 |
| Tll5          | -2.10914 | 1.9E-06 | 0.35112 | 0.81654 | 0.7269  | 0.81761 | 0.70275 | 0.45897 |
| Smyd3         | -2.11391 | 0.00069 | 0.44138 | 0.93171 | 0.65683 | 0.70477 | 0.73717 | 0.63686 |
| Mblac2        | -2.116   | 0.00886 | 0.17906 | 0.69499 | 0.634   | 0.56217 | 0.68261 | 0.31968 |
| Ikbkg         | -2.11776 | 2.4E-07 | 1.38526 | 2.92444 | 3.22973 | 2.5378  | 2.9109  | 2.18546 |
| Ybey          | -2.11853 | 0.02608 | 0.17937 | 0.4527  | 0.61461 | 0.83667 | 0.67728 | 0.37252 |
| Txlng         | -2.11927 | 9.9E-07 | 0.81401 | 2.20774 | 2.64191 | 2.41103 | 1.92829 | 1.31621 |
| Mtcl1         | -2.1199  | 0.00025 | 1.67455 | 4.27511 | 4.12794 | 3.10742 | 3.0236  | 3.471   |
| Acta2         | -2.12102 | 0.00418 | 16.0625 | 49.0371 | 45.1904 | 62.4768 | 34.9394 | 18.3113 |
| Sgms2         | -2.1227  | 0.00197 | 0.72538 | 1.34427 | 0.70106 | 1.08616 | 1.18178 | 0.66889 |
| Baiap2l1      | -2.12429 | 0.0009  | 1.54838 | 3.15003 | 2.3345  | 3.56501 | 2.25621 | 1.685   |
| Lynx1         | -2.12519 | 9.3E-06 | 1.32898 | 2.81569 | 1.99595 | 2.41474 | 2.21342 | 1.70923 |
| Arrdc4        | -2.12536 | 9.5E-08 | 1.83521 | 4.51342 | 4.08754 | 4.14138 | 3.81884 | 2.72071 |

|          |          |         |         |         |         |         |         |         |
|----------|----------|---------|---------|---------|---------|---------|---------|---------|
| Arl6     | -2.12721 | 0.00334 | 0.66245 | 1.15263 | 1.13498 | 1.17859 | 1.23467 | 0.63361 |
| Inmt     | -2.12938 | 0.0442  | 9.41031 | 27.9026 | 31.3523 | 41.7721 | 20.1266 | 10.3021 |
| Des      | -2.12994 | 0.00037 | 9.40992 | 17.5165 | 15.6885 | 18.8306 | 12.7027 | 12.3701 |
| Pfkfb2   | -2.13017 | 0.0004  | 1.58012 | 3.98803 | 4.25419 | 4.12237 | 3.81511 | 3.5264  |
| Mcee     | -2.13026 | 0.00543 | 0.84805 | 3.79429 | 3.15499 | 3.42331 | 3.14063 | 1.48319 |
| Lncpint  | -2.13113 | 6.2E-05 | 3.19589 | 6.98078 | 5.30029 | 5.89998 | 5.00341 | 4.79294 |
| Fgfr3    | -2.13191 | 0.00026 | 2.75067 | 9.29047 | 10.0685 | 8.80883 | 4.92651 | 6.05413 |
| Arhgap32 | -2.13238 | 1.6E-06 | 0.627   | 1.28855 | 1.31218 | 1.18113 | 1.29538 | 0.83054 |
| Ppl      | -2.13405 | 0.00071 | 2.32487 | 7.34942 | 8.0296  | 6.14066 | 4.61442 | 5.68967 |
| Tprn     | -2.13444 | 0.00542 | 1.06655 | 1.96676 | 1.00164 | 1.41385 | 1.56615 | 1.17879 |
| P4ha2    | -2.13616 | 0.00069 | 0.89106 | 3.80144 | 2.65891 | 3.81174 | 1.84002 | 1.63349 |
| Efcc1    | -2.13861 | 0.01772 | 0.34291 | 0.64255 | 0.47001 | 0.43065 | 0.53744 | 0.48104 |
| Cgn      | -2.13866 | 0.00031 | 4.59737 | 8.89769 | 10.0452 | 7.13855 | 7.59725 | 7.93331 |
| Uhrf1bp1 | -2.13901 | 1.4E-06 | 1.06403 | 2.67021 | 2.55219 | 2.33011 | 2.29184 | 1.67919 |
| Glis3    | -2.14017 | 3.3E-06 | 0.69423 | 1.88289 | 1.55299 | 1.52987 | 1.4315  | 1.09247 |
| Taf1a    | -2.14786 | 0.00181 | 0.96155 | 2.66401 | 2.2405  | 2.08307 | 1.75954 | 1.98651 |
| Trappc6a | -2.14985 | 0.00489 | 1.60354 | 2.86811 | 2.99709 | 2.70034 | 2.66755 | 2.23085 |
| Dsp      | -2.15089 | 1.4E-06 | 2.3224  | 5.3631  | 4.23048 | 5.20606 | 3.74942 | 3.03842 |
| Atn1     | -2.15091 | 0.00017 | 3.75153 | 7.98661 | 6.66043 | 10.7983 | 8.43396 | 7.45569 |
| Ift74    | -2.15141 | 5.7E-05 | 0.91574 | 2.52132 | 2.12179 | 2.38222 | 2.32737 | 1.00099 |
| Ank3     | -2.15326 | 1.4E-06 | 0.61103 | 1.48788 | 1.31028 | 1.29214 | 1.058   | 0.9954  |
| Pygb     | -2.15327 | 1.2E-08 | 3.56441 | 7.19468 | 5.74377 | 6.82045 | 5.83939 | 4.29374 |
| Prpf40b  | -2.15341 | 0.00207 | 1.75413 | 3.53102 | 3.63846 | 2.40854 | 2.8651  | 3.23916 |
| Safb2    | -2.15478 | 0.01111 | 6.86546 | 11.0038 | 9.99331 | 8.52407 | 7.91681 | 10.4847 |
| Atp6v0e2 | -2.15767 | 0.0011  | 0.77829 | 1.40626 | 1.16676 | 1.13014 | 1.40935 | 0.85606 |
| Firre    | -2.1599  | 0.00259 | 3.63734 | 7.33062 | 6.83337 | 4.50626 | 5.81075 | 6.46897 |
| Ltbp4    | -2.16075 | 0.00135 | 5.91371 | 28.1055 | 27.6817 | 23.4506 | 17.717  | 15.3986 |
| Iqcb1    | -2.16116 | 0.03774 | 0.1075  | 0.60429 | 0.66304 | 0.66152 | 0.78685 | 0.64158 |
| Abhd14b  | -2.16164 | 0.01414 | 0.52034 | 1.6018  | 1.96129 | 2.04211 | 1.74123 | 1.32715 |
| Osgin1   | -2.16356 | 0.00163 | 0.77964 | 2.74782 | 2.70117 | 2.55657 | 2.02549 | 1.5908  |
| Rab3ip   | -2.16368 | 2.3E-05 | 1.29166 | 3.63045 | 2.27201 | 3.35244 | 2.36361 | 1.61428 |
| Calcoco1 | -2.16641 | 6.1E-08 | 2.45491 | 6.38364 | 6.44918 | 5.89077 | 5.22905 | 4.0028  |
| St3gal5  | -2.168   | 4.4E-05 | 1.32719 | 3.01976 | 2.668   | 2.69459 | 2.72094 | 1.69252 |
| Sel1l3   | -2.16997 | 0.00567 | 0.13485 | 0.39256 | 0.32345 | 0.4128  | 0.25704 | 0.20636 |
| Fam216a  | -2.17054 | 0.01378 | 1.33509 | 3.75251 | 2.91644 | 3.24858 | 2.75694 | 1.85158 |
| Dusp14   | -2.17137 | 0.00018 | 1.0123  | 2.34315 | 2.69338 | 2.28087 | 2.54252 | 1.32133 |
| Tmem205  | -2.17166 | 0.01834 | 1.06557 | 3.29118 | 2.58397 | 3.8602  | 2.16653 | 1.12892 |
| Lamc3    | -2.17189 | 0.00142 | 0.45636 | 1.84765 | 1.74618 | 1.50443 | 1.07285 | 1.1494  |
| Rnf8     | -2.17272 | 0.03113 | 1.31199 | 2.22425 | 1.79825 | 1.89939 | 1.83394 | 0.94811 |
| Auts2    | -2.17445 | 3.3E-05 | 0.44326 | 0.88416 | 0.81333 | 0.68237 | 0.72317 | 0.68927 |
| Slain1   | -2.17865 | 0.02884 | 0.84643 | 0.79301 | 0.72509 | 0.81939 | 0.8067  | 0.86354 |
| Tchp     | -2.17987 | 0.03675 | 1.47368 | 2.48764 | 2.18477 | 1.68077 | 1.83447 | 2.27822 |
| Kank1    | -2.18104 | 9.4E-07 | 1.12701 | 3.52968 | 3.14093 | 2.81894 | 2.69246 | 2.05526 |
| Sh3yl1   | -2.18148 | 0.02756 | 0.27198 | 0.65525 | 0.71451 | 0.797   | 0.48387 | 0.41622 |
| Itgbl1   | -2.18288 | 0.01353 | 0.24648 | 0.6378  | 0.76952 | 0.85985 | 0.68212 | 0.16764 |
| Pla2g16  | -2.18375 | 0.00017 | 0.52513 | 1.09063 | 1.06724 | 1.22802 | 1.03089 | 0.4988  |
| Dnaja1   | -2.18456 | 0.00176 | 3.90583 | 17.0302 | 10.6517 | 14.4795 | 7.08175 | 5.55612 |
| Cspp1    | -2.18511 | 3.5E-05 | 1.08044 | 2.95155 | 2.41305 | 2.10801 | 2.1036  | 1.91177 |
| Nphp1    | -2.18718 | 0.00143 | 0.98369 | 3.19417 | 3.22416 | 2.57818 | 2.28268 | 2.22533 |
| Gm35339  | -2.18722 | 0.01276 | 0.31856 | 0.29237 | 0.45222 | 0.40007 | 0.37011 | 0.31339 |
| Dhx16    | -2.18759 | 0.00204 | 4.07376 | 9.13275 | 7.92954 | 6.91023 | 6.0108  | 7.0351  |
| Nrxn2    | -2.18797 | 0.01228 | 0.1174  | 0.19528 | 0.18964 | 0.17376 | 0.15771 | 0.21173 |
| Thbs3    | -2.19048 | 2E-05   | 1.27274 | 3.25906 | 3.32435 | 2.8047  | 2.0995  | 1.96608 |
| Per3     | -2.19453 | 0.00023 | 1.89255 | 5.03377 | 4.83276 | 3.3835  | 4.03791 | 3.52342 |
| Spag1    | -2.19716 | 0.00042 | 0.42514 | 0.95106 | 1.20704 | 0.95341 | 0.9107  | 0.74354 |
| Sec14l1  | -2.19941 | 3.3E-10 | 5.56823 | 13.661  | 13.0629 | 12.0906 | 10.78   | 8.38536 |



|               |          |         |         |         |         |         |         |         |
|---------------|----------|---------|---------|---------|---------|---------|---------|---------|
| B230118H07Rik | -2.19966 | 0.00336 | 0.27004 | 0.52045 | 0.48116 | 0.47478 | 0.52159 | 0.26861 |
| Nek1          | -2.19987 | 3.4E-06 | 0.71965 | 2.005   | 2.08346 | 1.63233 | 1.62743 | 1.35976 |
| 2210408I21Rik | -2.20029 | 0.00101 | 0.48279 | 1.30596 | 0.9926  | 0.79779 | 1.22702 | 0.69994 |
| Eml2          | -2.20057 | 4.5E-05 | 2.03479 | 6.29897 | 5.26304 | 4.43076 | 4.53755 | 3.86726 |
| Usp20         | -2.20149 | 5.7E-05 | 0.79488 | 1.2266  | 1.30312 | 1.03741 | 1.29927 | 0.97791 |
| Adi1          | -2.20494 | 0.00165 | 0.92115 | 3.45207 | 3.36683 | 3.43194 | 2.37233 | 1.87955 |
| Slc1a5        | -2.20589 | 2.7E-09 | 4.71825 | 11.1887 | 10.4994 | 10.3347 | 8.46461 | 6.92315 |
| Foxa2         | -2.2097  | 0.00621 | 0.48869 | 2.6686  | 3.617   | 2.94587 | 2.08658 | 1.45831 |
| Rfx3          | -2.21281 | 2.8E-05 | 0.56681 | 1.61842 | 1.40273 | 1.10071 | 1.34453 | 0.97182 |
| Gna14         | -2.21348 | 0.00036 | 1.16401 | 1.29217 | 1.6189  | 1.46183 | 1.6358  | 1.04783 |
| Cep164        | -2.21708 | 0.00397 | 2.06949 | 3.54462 | 3.71921 | 2.38998 | 3.01602 | 3.3331  |
| Esrp2         | -2.22068 | 1.5E-07 | 1.44107 | 3.30031 | 3.36512 | 2.81521 | 2.45523 | 2.3074  |
| Ffar4         | -2.22126 | 0.01088 | 1.08087 | 2.27013 | 3.98859 | 2.29717 | 2.19764 | 2.54474 |
| Ephb2         | -2.22188 | 0.00051 | 0.11942 | 0.29508 | 0.21405 | 0.25957 | 0.21012 | 0.15464 |
| Sh3bgrl2      | -2.22502 | 3.1E-06 | 1.0705  | 1.99747 | 1.75857 | 1.55199 | 1.70444 | 1.44549 |
| Ccdc9         | -2.22722 | 0.03823 | 4.41657 | 5.89432 | 6.44266 | 4.0807  | 5.12064 | 6.59786 |
| Zfr2          | -2.22824 | 0.00259 | 0.29408 | 0.52203 | 0.43489 | 0.43735 | 0.44057 | 0.35529 |
| Fos           | -2.22846 | 0.04615 | 4.43186 | 12.1006 | 5.602   | 6.86447 | 6.9334  | 6.89522 |
| Tshz2         | -2.22914 | 0.03636 | 0.65493 | 1.30291 | 0.79567 | 1.87868 | 1.19543 | 0.94532 |
| Gnb5          | -2.23308 | 0.00514 | 0.66926 | 1.73178 | 1.09568 | 1.05062 | 1.30405 | 0.93884 |
| Cep78         | -2.23452 | 0.00097 | 0.68182 | 1.13158 | 1.27719 | 0.9419  | 1.29388 | 0.79995 |
| Ift122        | -2.23455 | 0.00038 | 0.85954 | 1.35711 | 1.32787 | 1.11605 | 1.17743 | 1.14817 |
| Myocd         | -2.23455 | 0.02441 | 0.41467 | 0.75287 | 0.45716 | 0.89436 | 0.48571 | 0.3035  |
| Rgma          | -2.23519 | 0.00025 | 0.45802 | 1.22606 | 1.44391 | 1.45721 | 1.11752 | 0.56074 |
| Cbarp         | -2.23854 | 4.1E-05 | 0.60274 | 1.8989  | 1.44574 | 1.45569 | 1.43761 | 0.97561 |
| Wdr19         | -2.23886 | 4.7E-06 | 0.32862 | 1.11333 | 0.86566 | 0.84475 | 0.79344 | 0.57362 |
| Pgm5          | -2.23925 | 0.00225 | 1.02637 | 2.73025 | 1.9563  | 2.49738 | 1.85858 | 1.25163 |
| Rgl3          | -2.24137 | 0.00118 | 0.82644 | 1.44585 | 1.33502 | 0.98229 | 1.15522 | 1.30989 |
| Wwc1          | -2.24324 | 1.8E-07 | 5.95441 | 15.8827 | 15.8906 | 12.1553 | 11.3232 | 10.9704 |
| Arhgef4       | -2.24758 | 0.01843 | 0.50878 | 0.71987 | 0.41509 | 0.45639 | 0.49875 | 0.63956 |
| Ppp1r14c      | -2.24764 | 4.9E-05 | 2.61113 | 4.40698 | 3.79122 | 3.55711 | 3.01443 | 2.67521 |
| Fam184a       | -2.24933 | 0.00267 | 0.3991  | 0.641   | 0.78407 | 0.85206 | 0.43278 | 0.54968 |
| Dync2li1      | -2.24947 | 0.00258 | 0.69981 | 2.88018 | 2.45792 | 2.69153 | 2.08984 | 1.13788 |
| 1700030K09Rik | -2.25352 | 0.00547 | 0.66294 | 1.09606 | 0.98882 | 0.88153 | 1.11003 | 0.62661 |
| Trim45        | -2.2538  | 0.04054 | 0.13512 | 0.40304 | 0.30426 | 0.31515 | 0.32379 | 0.17724 |
| Cmb1          | -2.25532 | 0.00309 | 0.94315 | 2.6509  | 1.80981 | 1.65825 | 2.1094  | 1.44333 |
| Slc44a3       | -2.25544 | 1.2E-05 | 0.59547 | 1.76564 | 1.88348 | 1.5388  | 1.32714 | 1.19165 |
| Tcte2         | -2.25735 | 0.01614 | 0.20295 | 0.23904 | 0.19472 | 0.2209  | 0.24071 | 0.23812 |
| B9d1          | -2.25946 | 0.00787 | 0.58164 | 1.45965 | 0.9467  | 1.59788 | 0.88695 | 0.44505 |
| Cep290        | -2.2661  | 2.8E-06 | 1.50452 | 3.06698 | 3.0734  | 2.41633 | 2.61781 | 2.15851 |
| Dnaaf2        | -2.26849 | 0.00198 | 0.75163 | 3.10029 | 2.71601 | 1.60899 | 1.64979 | 1.77764 |
| Bcas1         | -2.2736  | 0.01709 | 0.46021 | 1.05944 | 0.58873 | 0.57796 | 0.77975 | 0.49299 |
| Mob3b         | -2.27432 | 9.4E-09 | 1.02743 | 1.63515 | 2.06114 | 1.77124 | 1.87059 | 1.00055 |
| Cnksr1        | -2.27988 | 0.0051  | 0.74349 | 1.55899 | 1.98149 | 1.42651 | 1.19674 | 1.39062 |
| Abcb6         | -2.28207 | 0.00601 | 0.58836 | 1.29495 | 1.22457 | 0.90309 | 0.9415  | 0.58358 |
| Pomgnt2       | -2.28287 | 0.01727 | 0.19948 | 0.5767  | 0.92962 | 0.77661 | 0.48671 | 0.42738 |
| Thnsl1        | -2.2861  | 0.00034 | 0.60158 | 1.01221 | 1.29572 | 1.02533 | 0.94648 | 0.83294 |
| Tef           | -2.28863 | 3.6E-07 | 3.40168 | 11.4236 | 12.6755 | 8.95092 | 8.98976 | 6.60288 |
| Wdr90         | -2.29064 | 0.00338 | 1.17652 | 2.17526 | 2.03448 | 0.96212 | 1.31428 | 1.61204 |
| Agmo          | -2.29232 | 0.00039 | 0.27642 | 0.59194 | 0.78299 | 0.61328 | 0.62759 | 0.35251 |
| Tox3          | -2.29425 | 0.01179 | 0.58669 | 0.47114 | 0.61493 | 0.60677 | 0.6666  | 0.36969 |
| Cacnb1        | -2.29513 | 0.00064 | 0.76718 | 1.15003 | 1.13916 | 0.89924 | 1.16989 | 0.86096 |
| Wdpcp         | -2.29777 | 0.00195 | 0.39036 | 0.721   | 0.89619 | 0.68633 | 0.64487 | 0.58244 |
| Cep128        | -2.30091 | 0.0064  | 1.06916 | 2.01408 | 1.78043 | 1.46193 | 1.32055 | 1.63617 |
| Fam89a        | -2.30338 | 0.0257  | 0.69249 | 1.11221 | 1.48305 | 0.76096 | 1.36398 | 0.9935  |
| Cbr3          | -2.30423 | 0.00024 | 1.18789 | 3.25928 | 3.25633 | 2.85932 | 2.91841 | 1.59063 |

|               |          |         |         |         |         |         |         |         |
|---------------|----------|---------|---------|---------|---------|---------|---------|---------|
| Cyb5a         | -2.3082  | 4E-05   | 4.26958 | 11.6315 | 10.7781 | 13.5068 | 8.15902 | 4.25941 |
| Fam173b       | -2.30928 | 5.4E-06 | 0.61794 | 1.41781 | 1.07383 | 0.97005 | 1.27884 | 0.69235 |
| Zfp704        | -2.31126 | 0.00038 | 1.54122 | 2.99969 | 2.73162 | 4.05703 | 3.89774 | 2.83493 |
| Igfbp5        | -2.31414 | 1.8E-09 | 7.32789 | 18.8154 | 14.2596 | 14.0221 | 14.7815 | 9.03027 |
| Stx1b         | -2.31502 | 0.02341 | 0.28943 | 0.44548 | 0.38017 | 0.31804 | 0.44135 | 0.29528 |
| Ppp1r9a       | -2.31521 | 1.2E-07 | 0.9724  | 2.57308 | 2.40342 | 1.75672 | 1.8515  | 1.70764 |
| Bbs5          | -2.31538 | 0.01549 | 0.18948 | 0.79885 | 0.84405 | 0.65439 | 0.69827 | 0.3987  |
| Spef1         | -2.31671 | 0.00012 | 2.61405 | 5.04488 | 4.21858 | 3.41525 | 2.97893 | 3.64548 |
| Intu          | -2.318   | 0.00093 | 0.45218 | 1.23961 | 1.07925 | 0.69515 | 0.86389 | 0.90673 |
| Col11a2       | -2.31923 | 0.03225 | 0.40692 | 0.61271 | 0.46478 | 0.46845 | 0.31888 | 0.5838  |
| Thrb          | -2.32004 | 3E-05   | 0.40638 | 1.06417 | 0.79918 | 0.83211 | 0.73645 | 0.56782 |
| Osbpl3        | -2.32017 | 8.3E-05 | 1.59202 | 2.95904 | 1.90932 | 1.91873 | 2.44074 | 1.77811 |
| Mttp          | -2.32231 | 0.00294 | 0.13064 | 0.43462 | 0.47322 | 0.45703 | 0.3415  | 0.17136 |
| Gpld1         | -2.32471 | 2.3E-05 | 0.64631 | 1.79062 | 1.43952 | 1.60306 | 1.05127 | 1.0138  |
| Tmem30b       | -2.32659 | 2.6E-05 | 0.59992 | 1.92705 | 1.62035 | 1.59546 | 1.56057 | 0.75606 |
| Megf6         | -2.32697 | 3.6E-05 | 2.05848 | 4.86474 | 5.72348 | 3.47151 | 3.04185 | 4.27521 |
| Prr15l        | -2.32716 | 0.01096 | 2.50946 | 7.70528 | 8.49774 | 4.93122 | 3.82671 | 4.72131 |
| Noxo1         | -2.32766 | 0.02061 | 0.49972 | 0.70999 | 0.57956 | 0.62757 | 0.66433 | 0.4706  |
| 1110065P20Rik | -2.32872 | 0.04882 | 1.07932 | 0.93342 | 1.47935 | 1.30334 | 1.22385 | 1.46113 |
| Pex7          | -2.33018 | 2.4E-06 | 0.40081 | 0.89901 | 1.02295 | 0.81578 | 0.8079  | 0.56049 |
| Car8          | -2.33032 | 3E-06   | 3.66726 | 5.47962 | 5.91229 | 5.07743 | 4.96579 | 4.23207 |
| Selenbp1      | -2.33493 | 0.00056 | 9.88514 | 42.4329 | 59.0147 | 41.8184 | 28.4644 | 22.6522 |
| Pms1          | -2.33834 | 0.03516 | 0.34159 | 0.36576 | 0.45519 | 0.26216 | 0.47267 | 0.37754 |
| Cap2          | -2.34033 | 0.00952 | 0.31378 | 0.78394 | 0.66901 | 0.67866 | 0.47848 | 0.50686 |
| Prkcz         | -2.34182 | 3.6E-06 | 0.91658 | 2.50261 | 2.57541 | 1.92233 | 1.95679 | 1.57099 |
| Phf1          | -2.34201 | 0.00013 | 5.19732 | 8.50058 | 8.49608 | 5.53905 | 6.54395 | 7.77117 |
| Grk4          | -2.34342 | 0.04353 | 0.52765 | 1.00154 | 0.95333 | 0.70783 | 0.88996 | 0.95429 |
| Stard10       | -2.34384 | 9E-05   | 3.20789 | 6.49792 | 5.28278 | 4.20904 | 4.25898 | 3.40707 |
| Camkk1        | -2.34423 | 0.00166 | 0.24854 | 1.09774 | 1.29875 | 0.87786 | 0.82117 | 0.73692 |
| Lzts3         | -2.34501 | 0.00769 | 0.65373 | 1.42182 | 0.87736 | 0.80389 | 0.88612 | 0.97958 |
| Polr3g        | -2.34524 | 0.01814 | 0.17655 | 0.42534 | 0.42348 | 0.42498 | 0.26923 | 0.2927  |
| Fam160a1      | -2.34593 | 0.01594 | 0.63493 | 1.63512 | 1.42541 | 1.37479 | 1.11288 | 0.88788 |
| Fanca         | -2.3539  | 0.0062  | 0.50235 | 0.81745 | 1.23213 | 0.65579 | 0.78621 | 0.63727 |
| Acss2         | -2.35614 | 0.00052 | 0.27351 | 0.75044 | 1.36675 | 0.85156 | 0.63141 | 0.49704 |
| Krtcap3       | -2.35658 | 0.00145 | 2.6834  | 3.89274 | 3.97458 | 2.71772 | 3.29996 | 3.64285 |
| Ppp1r16a      | -2.35776 | 6.7E-05 | 2.95242 | 6.39025 | 6.59033 | 4.60829 | 4.35925 | 4.96998 |
| Shh           | -2.35997 | 0.01011 | 0.97635 | 1.63345 | 2.0352  | 0.76635 | 1.32342 | 1.30736 |
| Slc24a3       | -2.3606  | 1.9E-07 | 1.06582 | 2.11939 | 1.77389 | 1.75282 | 1.71558 | 1.16504 |
| Spice1        | -2.36079 | 0.00018 | 0.57739 | 1.32232 | 1.28966 | 1.32938 | 0.82611 | 0.80177 |
| Mn1           | -2.36227 | 1.2E-05 | 0.55073 | 1.80925 | 1.3267  | 1.44614 | 1.15367 | 0.77894 |
| Bik           | -2.36316 | 0.0086  | 1.10538 | 2.2685  | 2.69346 | 1.3882  | 2.49719 | 1.69159 |
| Sgsm3         | -2.36481 | 0.00018 | 1.80718 | 3.88425 | 3.40586 | 2.98715 | 2.59369 | 2.6029  |
| Aldh1a1       | -2.36689 | 0.00036 | 24.8224 | 67.1402 | 66.8465 | 75.5602 | 46.1966 | 26.6768 |
| Agbl5         | -2.3677  | 1E-05   | 0.78822 | 2.00444 | 1.80061 | 1.39204 | 1.47742 | 1.33188 |
| lqce          | -2.36788 | 7.6E-05 | 0.99106 | 1.91627 | 1.84634 | 1.25067 | 1.55529 | 1.4283  |
| 9530026P05Rik | -2.37027 | 0.00209 | 0.24171 | 0.46909 | 0.41412 | 0.48063 | 0.32763 | 0.29283 |
| Cdr2          | -2.3742  | 3E-05   | 1.95669 | 4.58022 | 3.48077 | 5.07149 | 2.68751 | 1.78388 |
| Bcl7a         | -2.37537 | 6.2E-08 | 0.69565 | 1.30349 | 1.27967 | 1.0269  | 1.2283  | 0.73773 |
| Nr3c2         | -2.37801 | 2.7E-05 | 0.37569 | 1.04875 | 0.93178 | 0.82005 | 0.78204 | 0.50648 |
| Tmem67        | -2.38784 | 0.00012 | 0.34399 | 1.14099 | 1.04546 | 0.93913 | 0.86665 | 0.86973 |
| Mettl26       | -2.38787 | 0.03347 | 0.73105 | 2.43215 | 3.2923  | 2.55755 | 2.38883 | 1.91785 |
| Bbs2          | -2.38845 | 0.00034 | 0.62964 | 1.32027 | 0.98287 | 1.16415 | 0.80012 | 0.74943 |
| Agpat9        | -2.39    | 0.00946 | 0.19843 | 0.69053 | 0.56663 | 0.47764 | 0.65562 | 0.32897 |
| Ckmt1         | -2.39009 | 0.00044 | 2.08809 | 3.09284 | 2.2578  | 2.88457 | 2.38221 | 1.81076 |
| Dyrk1b        | -2.39768 | 6.8E-07 | 2.14878 | 3.79627 | 3.94656 | 3.83196 | 2.79612 | 2.49913 |
| Slc4a4        | -2.39769 | 3.4E-06 | 0.46049 | 1.0578  | 1.26233 | 0.89437 | 0.91995 | 0.68012 |

|          |          |         |         |         |         |         |         |         |
|----------|----------|---------|---------|---------|---------|---------|---------|---------|
| Mmp17    | -2.39891 | 0.00648 | 0.13998 | 0.26698 | 0.21585 | 0.23074 | 0.20457 | 0.13389 |
| Cys1     | -2.39893 | 0.00057 | 0.9192  | 2.39024 | 1.73985 | 1.869   | 1.15696 | 1.50715 |
| Setd4    | -2.39899 | 0.0209  | 0.39411 | 0.45496 | 0.27009 | 0.26294 | 0.40066 | 0.28271 |
| Rbks     | -2.39941 | 0.02991 | 0.62227 | 0.62464 | 0.79959 | 0.928   | 1.02797 | 0.41662 |
| Zfp467   | -2.39974 | 3.7E-08 | 1.33376 | 3.2788  | 2.77945 | 2.71762 | 2.19989 | 1.79116 |
| Al661453 | -2.40304 | 1.6E-06 | 1.30571 | 2.90652 | 2.33912 | 2.89121 | 1.93288 | 1.10425 |
| BC039771 | -2.40443 | 0.00089 | 0.49149 | 0.92752 | 1.04416 | 0.77155 | 0.72449 | 0.71453 |
| Ccdc85b  | -2.40935 | 0.00197 | 7.03663 | 13.8978 | 11.8603 | 8.00108 | 8.02351 | 12.078  |
| Igfbp6   | -2.41169 | 0.00624 | 1.56231 | 7.02583 | 7.28061 | 9.35238 | 3.5471  | 1.75328 |
| Cyp4b1   | -2.41273 | 4.6E-05 | 6.36595 | 24.9837 | 29.413  | 23.4362 | 15.1615 | 12.9238 |
| Ica1     | -2.41739 | 1.1E-05 | 1.60711 | 2.26571 | 1.93354 | 1.90618 | 2.12394 | 1.36634 |
| Coq4     | -2.41854 | 0.00209 | 0.2726  | 0.76618 | 0.6305  | 0.81306 | 0.41568 | 0.33894 |
| Wfdc1    | -2.42264 | 0.00094 | 0.97833 | 2.41738 | 2.37242 | 2.5518  | 1.53012 | 0.97891 |
| Zfp69    | -2.43116 | 0.01277 | 0.791   | 0.90267 | 0.97005 | 0.81039 | 0.86762 | 0.76452 |
| Tmem184a | -2.44015 | 5.8E-07 | 0.48285 | 1.16327 | 1.2033  | 1.11632 | 0.94828 | 0.62137 |
| Ptms     | -2.44114 | 0.01049 | 79.6928 | 122.594 | 115.358 | 87.8195 | 73.4528 | 111.829 |
| Plekhb1  | -2.44641 | 3.1E-06 | 0.96698 | 4.33356 | 4.12577 | 3.17308 | 2.75885 | 2.10035 |
| Fam84b   | -2.44886 | 3.1E-08 | 4.35837 | 10.7825 | 9.69727 | 5.81712 | 7.75878 | 6.05659 |
| Rmdn1    | -2.44946 | 0.0281  | 0.53101 | 1.80047 | 1.2939  | 1.25965 | 1.28959 | 1.08349 |
| Tmod1    | -2.4506  | 2.5E-06 | 0.99794 | 2.33347 | 2.35343 | 3.44648 | 1.90966 | 1.50471 |
| Gprc5c   | -2.45062 | 1.4E-05 | 1.05993 | 3.28057 | 2.1489  | 1.67776 | 2.23363 | 1.63893 |
| Cftr     | -2.45671 | 0.03558 | 0.07458 | 0.2156  | 0.20444 | 0.20605 | 0.18954 | 0.05706 |
| Slc25a33 | -2.45733 | 0.00073 | 0.67515 | 1.28152 | 1.30395 | 1.19476 | 1.12314 | 0.70446 |
| Slc4a3   | -2.45935 | 0.01991 | 1.01017 | 1.79549 | 1.52303 | 0.76118 | 0.96533 | 1.75201 |
| Cldn3    | -2.46223 | 4.1E-07 | 6.80748 | 18.3949 | 18.2829 | 18.5426 | 12.2512 | 7.95403 |
| Map1b    | -2.46338 | 4.4E-09 | 2.24759 | 6.08966 | 4.67451 | 5.16668 | 3.45718 | 2.78902 |
| Arhgap39 | -2.46386 | 2.4E-06 | 1.28915 | 2.75226 | 2.58579 | 2.13233 | 2.20558 | 1.5157  |
| Muc20    | -2.46591 | 0.01337 | 0.54645 | 0.76218 | 0.7687  | 0.66821 | 0.42396 | 0.35211 |
| Gsta4    | -2.46771 | 7.5E-05 | 3.38492 | 9.40372 | 9.1536  | 8.15729 | 6.69627 | 4.41003 |
| Kctd14   | -2.46844 | 0.03315 | 0.81182 | 0.68815 | 0.92725 | 0.5664  | 0.87115 | 0.75921 |
| Mapk12   | -2.47089 | 8.5E-08 | 2.51381 | 3.64354 | 4.11781 | 3.58049 | 3.1477  | 2.53336 |
| Rpusd3   | -2.47234 | 0.04357 | 0.53645 | 1.07699 | 1.10291 | 0.37054 | 0.81804 | 0.65675 |
| Prkar2b  | -2.47242 | 3.3E-05 | 0.95142 | 2.26664 | 1.93434 | 2.11089 | 1.75711 | 0.80079 |
| Mlf1     | -2.47289 | 0.00218 | 0.53901 | 2.11014 | 1.52374 | 1.56537 | 1.16441 | 0.7733  |
| Cep83    | -2.474   | 2.2E-05 | 3.80117 | 8.75265 | 8.08084 | 5.91844 | 5.97388 | 5.60927 |
| Upp2     | -2.47684 | 0.01707 | 0.09853 | 0.29012 | 0.28134 | 0.19592 | 0.24206 | 0.15078 |
| Cblc     | -2.47694 | 0.00338 | 0.54696 | 1.02489 | 0.93711 | 0.80139 | 0.90357 | 0.52314 |
| Per2     | -2.47895 | 2.7E-06 | 3.71824 | 11.3402 | 9.70475 | 7.51355 | 6.08216 | 6.62838 |
| Irx3     | -2.4813  | 0.00014 | 1.59346 | 3.97358 | 3.39102 | 3.10706 | 2.04622 | 2.31017 |
| Rsph3b   | -2.48405 | 0.00811 | 2.00925 | 6.68464 | 5.50791 | 5.00162 | 4.45    | 4.66713 |
| Ccdc64b  | -2.48628 | 0.00092 | 0.48435 | 1.16686 | 1.07878 | 0.95042 | 0.954   | 0.50958 |
| Foxp2    | -2.48882 | 0.00021 | 0.25074 | 0.29288 | 0.30722 | 0.26718 | 0.23559 | 0.26162 |
| Slc16a7  | -2.48893 | 2.5E-05 | 0.41088 | 1.68907 | 1.29394 | 1.22244 | 0.9647  | 0.68118 |
| Trpm4    | -2.49776 | 5.2E-06 | 1.00563 | 1.9588  | 2.04554 | 1.28309 | 1.45737 | 1.46528 |
| Eef2k    | -2.49903 | 1.3E-08 | 1.0475  | 2.00883 | 1.93932 | 1.44314 | 1.52582 | 1.3518  |
| Engase   | -2.50016 | 0.00016 | 0.78196 | 0.9509  | 1.04116 | 0.85577 | 0.94258 | 0.71799 |
| Pnma1    | -2.50347 | 0.01727 | 0.34368 | 1.22224 | 1.14399 | 0.92488 | 0.6239  | 0.71377 |
| Bphl     | -2.5038  | 8.2E-06 | 2.01175 | 6.46214 | 7.15604 | 5.65448 | 4.82073 | 3.07863 |
| Pnpo     | -2.50651 | 0.00043 | 1.22749 | 2.79821 | 2.25229 | 2.16314 | 2.25422 | 1.69667 |
| Tmc4     | -2.50942 | 3E-06   | 3.38257 | 6.62795 | 6.30533 | 4.34998 | 4.49788 | 4.14115 |
| Hmgcll1  | -2.51453 | 1E-06   | 0.51012 | 0.87052 | 1.07792 | 0.8008  | 0.86432 | 0.45538 |
| Slc39a4  | -2.51634 | 6.2E-08 | 5.2077  | 5.9385  | 7.24492 | 6.63823 | 6.16773 | 4.06443 |
| Nat9     | -2.51638 | 0.0002  | 1.40149 | 2.8812  | 1.88251 | 1.97128 | 1.68122 | 1.80158 |
| Tfcp2l1  | -2.51663 | 8.2E-07 | 1.04308 | 1.61617 | 1.32036 | 1.61049 | 1.37853 | 0.69484 |
| Fgfr2    | -2.52254 | 2E-10   | 1.99964 | 4.3935  | 4.95533 | 4.23901 | 3.32574 | 2.28896 |
| Rnf32    | -2.52387 | 0.00235 | 0.42285 | 0.61123 | 0.52162 | 0.42483 | 0.58033 | 0.32355 |



|               |          |         |         |         |         |         |         |         |
|---------------|----------|---------|---------|---------|---------|---------|---------|---------|
| Ptpu          | -2.52589 | 1.4E-06 | 1.90508 | 4.26273 | 3.15796 | 2.53565 | 3.12027 | 2.27999 |
| Adam8         | -2.53031 | 0.01827 | 6.44272 | 7.62037 | 3.18313 | 5.58226 | 5.24232 | 5.38831 |
| Eya2          | -2.53099 | 1.8E-08 | 1.83716 | 4.86545 | 3.32172 | 3.90262 | 2.92072 | 1.91418 |
| Ryr3          | -2.53206 | 0.03373 | 0.12432 | 0.26798 | 0.19282 | 0.12737 | 0.0898  | 0.24532 |
| Ppp1r26       | -2.5325  | 7.2E-07 | 0.47408 | 0.92694 | 0.91818 | 0.8154  | 0.71245 | 0.48892 |
| Efcab5        | -2.53302 | 0.0216  | 0.24671 | 0.23414 | 0.32278 | 0.15492 | 0.25081 | 0.29174 |
| Zscan18       | -2.53384 | 0.03558 | 0.10872 | 0.3929  | 0.39118 | 0.22188 | 0.27633 | 0.27037 |
| Strbp         | -2.53469 | 1.4E-08 | 0.4915  | 2.03344 | 1.77796 | 1.2931  | 1.32821 | 0.89496 |
| Fermt1        | -2.53875 | 0.0015  | 0.30484 | 0.44064 | 0.65459 | 0.26799 | 0.55783 | 0.3732  |
| Npas2         | -2.54323 | 0.01405 | 0.14505 | 0.27178 | 0.36448 | 0.2277  | 0.28262 | 0.16648 |
| Ric3          | -2.54743 | 0.00877 | 0.06764 | 0.16296 | 0.15761 | 0.11893 | 0.15816 | 0.05176 |
| Acpp          | -2.54745 | 0.0006  | 0.17381 | 0.43142 | 0.57391 | 0.30757 | 0.36945 | 0.33852 |
| Cacna1h       | -2.55326 | 0.01643 | 0.4508  | 0.63829 | 0.29268 | 0.37991 | 0.47034 | 0.38124 |
| Cep70         | -2.55396 | 2.9E-08 | 0.86756 | 1.66432 | 1.55245 | 1.16519 | 1.37195 | 1.01418 |
| Epha1         | -2.55469 | 1.7E-07 | 0.73714 | 1.39702 | 1.49532 | 1.3701  | 1.25896 | 0.72196 |
| Cckar         | -2.56189 | 0.00094 | 0.97512 | 1.99557 | 2.62996 | 1.5999  | 1.23115 | 1.70887 |
| Optn          | -2.56276 | 4E-07   | 1.45044 | 2.52781 | 2.77055 | 2.1316  | 2.02356 | 1.62931 |
| Tmem216       | -2.56459 | 0.00107 | 0.46867 | 1.035   | 1.084   | 0.91965 | 1.19112 | 0.40343 |
| Mzf1          | -2.56531 | 0.00155 | 0.19588 | 0.3146  | 0.39313 | 0.24599 | 0.29869 | 0.23552 |
| Gsn           | -2.56871 | 0.00035 | 24.9101 | 105.883 | 107.984 | 106.198 | 55.608  | 35.1451 |
| Map9          | -2.57014 | 0.00041 | 0.29515 | 1.38028 | 0.95186 | 0.66501 | 0.76777 | 0.66422 |
| Mfsd6l        | -2.57195 | 0.00391 | 0.28111 | 0.85785 | 1.07886 | 0.9179  | 0.62872 | 0.38718 |
| Hes6          | -2.57744 | 8.7E-05 | 4.22791 | 7.71642 | 8.16558 | 5.43033 | 6.41463 | 4.99961 |
| Fam46c        | -2.58217 | 5.5E-07 | 2.69745 | 4.56119 | 5.7411  | 4.04366 | 3.83335 | 3.08144 |
| Pfn2          | -2.58724 | 6.4E-07 | 0.75229 | 1.91743 | 1.63632 | 1.39661 | 1.2968  | 0.95103 |
| Spint2        | -2.5881  | 7.8E-14 | 13.7413 | 33.9876 | 30.0272 | 26.2307 | 21.1937 | 17.1834 |
| Rnf43         | -2.58844 | 4E-06   | 0.51216 | 0.95023 | 0.93195 | 0.78737 | 0.74509 | 0.51351 |
| Ttc9          | -2.59015 | 4.2E-06 | 2.38218 | 5.83012 | 5.20861 | 3.81083 | 3.83442 | 3.38511 |
| Ccdc136       | -2.59177 | 0.0028  | 0.26723 | 0.30044 | 0.34797 | 0.26849 | 0.29884 | 0.20448 |
| Cmtm8         | -2.59361 | 4.6E-05 | 1.60598 | 3.03454 | 3.81974 | 2.78804 | 2.25689 | 2.16853 |
| Sorbs2        | -2.59746 | 0.00041 | 0.34564 | 0.72263 | 0.43699 | 0.38169 | 0.41196 | 0.36479 |
| Hdac11        | -2.59848 | 2.7E-05 | 0.54163 | 1.4257  | 1.05171 | 0.98253 | 0.88712 | 0.7598  |
| Tle2          | -2.60119 | 5.6E-05 | 1.2846  | 2.61638 | 2.7304  | 1.62497 | 1.60876 | 2.13681 |
| Wdyhv1        | -2.60169 | 3E-05   | 1.83979 | 5.06552 | 4.32288 | 2.86064 | 3.25084 | 3.08362 |
| Mrps6         | -2.60442 | 3.3E-05 | 2.0898  | 5.74127 | 3.31663 | 4.6274  | 2.7395  | 1.59904 |
| Tspyl5        | -2.61244 | 0.02677 | 0.11559 | 0.55694 | 0.27725 | 0.21774 | 0.33783 | 0.22111 |
| Gpt           | -2.61555 | 6E-05   | 0.92708 | 2.07395 | 2.31448 | 1.91275 | 1.14444 | 1.46941 |
| Fads6         | -2.61691 | 0.00272 | 0.2089  | 0.40542 | 0.23861 | 0.27328 | 0.21237 | 0.23977 |
| B330016D10Rik | -2.6173  | 0.01905 | 0.40853 | 0.54679 | 1.30655 | 0.68408 | 0.58837 | 0.67729 |
| Atp2a2        | -2.62009 | 4.6E-05 | 17.8462 | 41.8929 | 23.3642 | 28.117  | 19.3721 | 20.7087 |
| Nsun7         | -2.62017 | 3.9E-05 | 0.32244 | 0.5006  | 0.61872 | 0.41843 | 0.46983 | 0.32896 |
| P4htm         | -2.62139 | 0.00487 | 0.50615 | 0.93248 | 0.61213 | 0.46739 | 0.49942 | 0.70623 |
| Ctnna3        | -2.62186 | 0.01919 | 0.16026 | 0.24452 | 0.16474 | 0.15095 | 0.16292 | 0.15941 |
| Cep89         | -2.62566 | 8.9E-05 | 1.20669 | 1.93806 | 1.54471 | 1.45824 | 1.20358 | 1.28915 |
| Phf24         | -2.63009 | 0.00078 | 0.14644 | 0.33973 | 0.40144 | 0.2963  | 0.26466 | 0.18675 |
| Igf2          | -2.63667 | 0.00014 | 0.40475 | 0.61757 | 0.7628  | 0.48289 | 0.42176 | 0.58843 |
| Nek2          | -2.64054 | 0.02681 | 1.87219 | 2.45085 | 1.8279  | 1.24002 | 1.5513  | 2.08011 |
| Plekhg6       | -2.64333 | 0.01387 | 0.52661 | 0.87398 | 1.03457 | 0.48499 | 0.58889 | 0.85961 |
| Fam167a       | -2.64978 | 8E-05   | 0.86715 | 4.39582 | 4.54992 | 2.41627 | 2.50692 | 2.36377 |
| Odf2l         | -2.64981 | 3.2E-05 | 0.8907  | 1.44208 | 1.5851  | 1.0825  | 1.10265 | 1.02229 |
| Ggt6          | -2.64991 | 0.04434 | 0.38224 | 0.5116  | 0.56757 | 0.36003 | 0.42097 | 0.43872 |
| Epdr1         | -2.64992 | 2.2E-05 | 0.63103 | 2.02701 | 1.53024 | 1.52402 | 1.13499 | 0.81712 |
| Cdkl2         | -2.65035 | 6.8E-09 | 0.76896 | 1.65276 | 1.98394 | 1.44856 | 1.31055 | 0.89988 |
| Dzip1         | -2.6504  | 5.6E-10 | 1.22069 | 2.33306 | 2.05794 | 1.90094 | 1.63807 | 1.15819 |
| Sirt3         | -2.65144 | 0.00104 | 0.80961 | 0.93912 | 1.47957 | 0.81905 | 1.09741 | 0.79156 |
| Ankrd6        | -2.65311 | 0.00028 | 0.25376 | 0.45851 | 0.52171 | 0.25229 | 0.39771 | 0.37215 |

|               |          |         |         |         |         |         |         |         |
|---------------|----------|---------|---------|---------|---------|---------|---------|---------|
| Nrn1          | -2.66009 | 0.04163 | 0.26233 | 0.42133 | 0.71912 | 0.41181 | 0.50004 | 0.25091 |
| Fbxo31        | -2.6608  | 0.0002  | 1.16199 | 2.71459 | 4.02512 | 2.12262 | 1.68603 | 1.98839 |
| Hpn           | -2.66296 | 0.00058 | 0.56483 | 0.81646 | 0.81289 | 0.63842 | 0.57421 | 0.60507 |
| Nat14         | -2.66516 | 0.00131 | 0.50114 | 1.4309  | 1.18296 | 0.55943 | 1.01893 | 0.93733 |
| Gm26908       | -2.66672 | 0.01547 | 0.21225 | 1.0227  | 1.1152  | 0.79968 | 0.57541 | 0.64963 |
| Naaladl2      | -2.66723 | 2.7E-05 | 0.20024 | 0.52709 | 0.44219 | 0.35626 | 0.26577 | 0.32346 |
| Gm28539       | -2.67127 | 0.00559 | 0.77679 | 1.49712 | 2.07615 | 1.75597 | 0.90814 | 1.6048  |
| Ces1d         | -2.67435 | 0.00027 | 6.01341 | 28.9744 | 37.1234 | 27.5985 | 15.7305 | 11.7837 |
| Pick1         | -2.67518 | 7.2E-07 | 0.84964 | 1.36461 | 1.36885 | 1.04831 | 1.03044 | 0.87822 |
| Hdgfrp2       | -2.6766  | 0.00112 | 7.51204 | 11.6519 | 11.6362 | 7.10785 | 7.47988 | 9.56677 |
| Rpgr          | -2.67864 | 3.2E-05 | 0.3516  | 0.94972 | 0.84334 | 0.40141 | 0.66613 | 0.61143 |
| Epb41l4b      | -2.67962 | 9.3E-09 | 0.4707  | 1.65899 | 1.63083 | 1.27259 | 0.99692 | 0.74034 |
| Macrodl       | -2.68182 | 0.0009  | 0.81819 | 1.67912 | 1.55755 | 1.71255 | 0.97041 | 0.69561 |
| Ift43         | -2.6833  | 9.8E-06 | 3.88555 | 10.0809 | 5.63292 | 6.7565  | 4.86163 | 4.34527 |
| Osbpl10       | -2.68339 | 0.00021 | 0.63104 | 1.3393  | 0.9576  | 0.91987 | 0.68735 | 0.75877 |
| Faim2         | -2.68364 | 0.01061 | 0.15374 | 0.43212 | 0.31609 | 0.28962 | 0.23444 | 0.21567 |
| Usp43         | -2.68548 | 2.5E-06 | 1.02516 | 1.86213 | 1.70623 | 1.22615 | 1.25311 | 1.13927 |
| Ppara         | -2.68732 | 0.02868 | 0.18116 | 0.48493 | 0.33107 | 0.28438 | 0.16882 | 0.36964 |
| Cyb5rl        | -2.68744 | 1.3E-05 | 0.31176 | 0.58835 | 0.67301 | 0.46983 | 0.41202 | 0.40553 |
| Sytl2         | -2.6913  | 1.5E-06 | 0.88292 | 0.86161 | 0.94209 | 0.89127 | 0.77829 | 0.64992 |
| Olfml2a       | -2.69375 | 1.4E-08 | 0.74735 | 2.55069 | 2.58933 | 1.98143 | 1.65671 | 1.06427 |
| Proser3       | -2.69618 | 0.00267 | 0.59327 | 1.08519 | 0.83574 | 0.68297 | 0.58637 | 0.73136 |
| Slc1a4        | -2.69943 | 8E-10   | 1.29802 | 3.38773 | 3.05281 | 2.46373 | 2.08434 | 1.67038 |
| Bbs9          | -2.70019 | 3.2E-07 | 1.28008 | 2.77104 | 2.80977 | 1.91048 | 1.56538 | 1.85957 |
| Ccdc157       | -2.7009  | 2.9E-05 | 2.05155 | 5.34188 | 4.89957 | 2.75863 | 2.79136 | 3.53594 |
| Adam22        | -2.70239 | 2.9E-08 | 0.27461 | 0.86689 | 0.99938 | 0.65407 | 0.62091 | 0.42749 |
| Acox2         | -2.70454 | 0.0003  | 0.6881  | 1.13027 | 1.09317 | 0.88379 | 0.938   | 0.57437 |
| Prr29         | -2.70612 | 0.01483 | 0.80617 | 2.26587 | 0.96684 | 1.13898 | 1.02444 | 1.02808 |
| Tmem102       | -2.70846 | 0.00317 | 0.23967 | 1.58783 | 0.90337 | 0.75247 | 0.79185 | 0.64185 |
| Dalrd3        | -2.71039 | 1.8E-05 | 4.19362 | 10.595  | 7.49167 | 5.38494 | 5.86797 | 5.84074 |
| Ahsa2         | -2.71053 | 3.8E-05 | 0.92001 | 4.69969 | 2.6446  | 3.36993 | 2.18234 | 1.50569 |
| Tmem38a       | -2.71565 | 0.00138 | 0.64885 | 1.47633 | 1.22283 | 1.12043 | 1.15434 | 0.4551  |
| Prdm16        | -2.71808 | 4.6E-11 | 0.83252 | 1.70631 | 1.61794 | 1.22498 | 0.96635 | 1.01732 |
| Sec14l2       | -2.72567 | 7.6E-06 | 0.39653 | 1.72484 | 1.13228 | 1.01671 | 1.14215 | 0.42983 |
| Coq8b         | -2.72648 | 0.00432 | 3.23754 | 6.46882 | 5.59969 | 3.92068 | 3.85945 | 4.80704 |
| Abhd3         | -2.73089 | 0.00104 | 0.35419 | 1.18513 | 0.8091  | 0.85255 | 0.75014 | 0.27101 |
| 1810064F22Rik | -2.73098 | 0.01993 | 0.25242 | 0.57434 | 0.57663 | 0.34342 | 0.36354 | 0.32191 |
| Gramd1c       | -2.73385 | 0.00017 | 0.41545 | 0.61166 | 0.68016 | 0.43479 | 0.51621 | 0.42385 |
| Tacc2         | -2.73686 | 6.6E-09 | 1.23985 | 3.46765 | 2.53736 | 2.26045 | 1.91239 | 1.75344 |
| Zc2hc1c       | -2.7375  | 1.1E-06 | 0.4393  | 0.83006 | 0.7615  | 0.64905 | 0.68302 | 0.29659 |
| Gm10643       | -2.73754 | 0.04179 | 0.22033 | 0.64876 | 0.60398 | 0.2767  | 0.5973  | 0.28098 |
| Cep131        | -2.7433  | 0.00084 | 1.14822 | 2.20814 | 2.19503 | 1.23329 | 1.30552 | 1.66467 |
| Gm20219       | -2.74678 | 0.01889 | 0.63888 | 1.31927 | 1.56369 | 0.80234 | 0.92784 | 1.04752 |
| Elf5          | -2.74805 | 0.00164 | 0.09854 | 0.39565 | 0.62126 | 0.38362 | 0.27047 | 0.24127 |
| Slc8a2        | -2.75    | 0.00923 | 0.13209 | 0.3359  | 0.22631 | 0.20735 | 0.17904 | 0.16845 |
| Cyp39a1       | -2.75045 | 4E-05   | 0.49317 | 1.85834 | 2.10587 | 1.42927 | 1.2534  | 0.81277 |
| Faah          | -2.75118 | 1.5E-06 | 0.68007 | 1.81648 | 2.00611 | 1.03046 | 1.20238 | 1.14254 |
| Scube3        | -2.75179 | 6.4E-07 | 0.46809 | 1.29954 | 0.93488 | 0.85659 | 0.59143 | 0.65493 |
| Arhgef28      | -2.75221 | 9.9E-08 | 2.25754 | 4.24996 | 3.99464 | 2.9281  | 2.52077 | 2.70435 |
| Mrv1          | -2.75541 | 1.4E-05 | 0.64467 | 1.56672 | 1.51142 | 1.00136 | 1.25038 | 0.68799 |
| Mum1l1        | -2.75666 | 0.00063 | 0.09534 | 0.47854 | 0.52273 | 0.37418 | 0.32713 | 0.18238 |
| Cds1          | -2.75898 | 8.7E-09 | 2.32285 | 4.22659 | 4.61447 | 2.80639 | 3.24323 | 2.67729 |
| Dnal1         | -2.76033 | 1.5E-11 | 1.13515 | 2.8286  | 2.36815 | 1.69813 | 1.75647 | 1.46892 |
| Dgkg          | -2.76465 | 0.03853 | 0.18681 | 0.28336 | 0.14225 | 0.0782  | 0.18991 | 0.20646 |
| Mgst1         | -2.76808 | 1.2E-08 | 6.7892  | 20.2836 | 23.7764 | 14.5236 | 13.1898 | 10.3457 |
| Tcea3         | -2.76981 | 1.2E-05 | 2.73002 | 4.65043 | 4.70568 | 3.06489 | 2.94357 | 3.41822 |

|               |          |         |         |         |         |         |         |         |
|---------------|----------|---------|---------|---------|---------|---------|---------|---------|
| Xylb          | -2.77046 | 4.2E-05 | 0.36669 | 0.92873 | 0.65725 | 0.7262  | 0.54484 | 0.30216 |
| Zfp239        | -2.77851 | 0.03875 | 0.07962 | 0.19181 | 0.29101 | 0.19998 | 0.12141 | 0.14215 |
| Ift172        | -2.78353 | 1.4E-08 | 2.32794 | 5.11639 | 5.16998 | 3.52805 | 2.98939 | 3.02679 |
| Ascc2         | -2.78556 | 7.3E-09 | 4.45638 | 10.5862 | 10.3453 | 6.78329 | 6.28562 | 5.94493 |
| Sned1         | -2.78783 | 4.6E-08 | 2.20875 | 5.72301 | 5.07632 | 3.47884 | 3.31853 | 3.51083 |
| Sord          | -2.79378 | 4.2E-08 | 3.34851 | 8.10662 | 10.4616 | 5.13289 | 5.35649 | 5.23735 |
| Ccdc171       | -2.79412 | 4.8E-06 | 0.65642 | 1.62792 | 1.7068  | 1.03046 | 0.95191 | 1.01931 |
| Ptpn13        | -2.79685 | 1.3E-11 | 1.92362 | 5.472   | 4.56483 | 3.28115 | 2.65607 | 2.71676 |
| Nr1d1         | -2.80035 | 0.00302 | 2.93594 | 7.88926 | 7.5581  | 8.41421 | 3.27169 | 2.13127 |
| Tpm2          | -2.80184 | 1E-06   | 6.01193 | 13.8762 | 10.7777 | 10.1752 | 7.30579 | 6.3061  |
| Esrp1         | -2.80257 | 2.9E-06 | 1.39608 | 2.10947 | 2.12752 | 1.46491 | 1.70872 | 1.32123 |
| Mettl7a1      | -2.80769 | 3.3E-07 | 12.1785 | 41.5896 | 47.7165 | 31.4387 | 23.0108 | 19.9079 |
| Palmd         | -2.81665 | 1.1E-07 | 1.18555 | 2.48999 | 2.16661 | 1.81338 | 1.3134  | 1.34908 |
| Pgbd1         | -2.81698 | 0.02879 | 0.06461 | 0.23349 | 0.30996 | 0.20286 | 0.18064 | 0.09888 |
| Pitpnm3       | -2.81864 | 5.6E-06 | 1.27442 | 2.49223 | 2.40181 | 1.15591 | 1.43954 | 1.85096 |
| Zswim5        | -2.81939 | 0.0058  | 0.10374 | 0.24993 | 0.27017 | 0.16937 | 0.16875 | 0.15876 |
| Mecom         | -2.82127 | 1.3E-11 | 1.35717 | 3.05868 | 2.68527 | 1.84874 | 2.01949 | 1.64143 |
| Ddrgk1        | -2.82287 | 5.9E-07 | 5.44639 | 9.68468 | 9.40745 | 8.27069 | 5.62159 | 5.31553 |
| Aspa          | -2.82313 | 0.0459  | 0.09726 | 0.32805 | 0.10665 | 0.23208 | 0.13843 | 0.04465 |
| Hnf1b         | -2.82516 | 0.00031 | 0.54324 | 1.48325 | 0.79423 | 0.88691 | 0.58908 | 0.69278 |
| Plxnb1        | -2.83081 | 9.2E-06 | 4.76945 | 12.0624 | 13.6371 | 5.59549 | 6.59172 | 8.58304 |
| Hsp90aa1      | -2.83307 | 1.8E-06 | 14.9378 | 56.974  | 44.0176 | 47.9538 | 25.6242 | 16.5699 |
| Rbpms2        | -2.83596 | 0.00043 | 0.50838 | 0.92786 | 0.9502  | 0.78356 | 0.72826 | 0.45972 |
| Dmkn          | -2.84497 | 0.00076 | 0.73972 | 1.69724 | 1.33978 | 1.26076 | 1.20858 | 0.48515 |
| Hook2         | -2.85041 | 7.9E-05 | 1.83424 | 2.78231 | 2.55398 | 1.57226 | 1.76111 | 2.07182 |
| Gm9899        | -2.85112 | 0.01844 | 0.07204 | 0.30855 | 0.32914 | 0.18095 | 0.17089 | 0.147   |
| Fam71f2       | -2.85167 | 0.02441 | 0.2723  | 0.65602 | 0.74645 | 0.56995 | 0.50751 | 0.20836 |
| Gm26583       | -2.85785 | 0.03973 | 0.06288 | 0.32821 | 0.51709 | 0.39482 | 0.2397  | 0.07217 |
| Dapk2         | -2.86071 | 1.2E-06 | 0.52765 | 3.01907 | 3.07367 | 1.90513 | 1.77687 | 1.16075 |
| Dmd           | -2.87484 | 2.4E-08 | 0.52068 | 1.42243 | 1.18387 | 0.83418 | 0.64558 | 0.75957 |
| Fam187b       | -2.87747 | 0.00248 | 0.17045 | 0.61595 | 0.67166 | 0.34784 | 0.47652 | 0.29345 |
| Gnao1         | -2.87816 | 4.6E-07 | 1.4621  | 2.18986 | 2.95034 | 2.22966 | 1.23865 | 1.71363 |
| Rasd1         | -2.87846 | 0.04084 | 0.86271 | 1.0392  | 1.7737  | 1.53488 | 0.58469 | 0.77014 |
| Dnajb1        | -2.87873 | 0.00049 | 2.2412  | 9.05702 | 3.79028 | 6.94576 | 2.81127 | 1.88084 |
| Entpd5        | -2.8799  | 5.7E-14 | 1.41921 | 3.55771 | 3.61443 | 2.36038 | 2.39814 | 1.67292 |
| Hid1          | -2.8808  | 4.1E-08 | 1.68877 | 3.36005 | 2.59107 | 1.85179 | 2.08836 | 1.79363 |
| Arhgap8       | -2.88709 | 2.4E-06 | 0.65324 | 1.73113 | 1.14157 | 0.98445 | 0.89652 | 0.77474 |
| Abcb9         | -2.88909 | 3.9E-05 | 0.26882 | 0.66423 | 0.36845 | 0.45446 | 0.45197 | 0.23733 |
| B230369F24Rik | -2.8896  | 0.02666 | 0.13573 | 0.29065 | 0.55809 | 0.25568 | 0.29896 | 0.2077  |
| Grm4          | -2.89022 | 0.01207 | 0.08711 | 0.47221 | 0.29851 | 0.20513 | 0.15498 | 0.28329 |
| Ccdc85c       | -2.89382 | 6.8E-05 | 1.123   | 2.58524 | 2.46277 | 1.64539 | 1.33193 | 1.66128 |
| Sec14l3       | -2.89628 | 1.9E-09 | 32.7406 | 125.682 | 125.845 | 72.5956 | 65.8285 | 56.8203 |
| Bag2          | -2.89985 | 2E-05   | 0.71969 | 1.11462 | 0.98644 | 0.87155 | 0.8623  | 0.39334 |
| Rbp4          | -2.90038 | 0.0015  | 0.62508 | 2.86842 | 2.69268 | 2.07469 | 1.13476 | 1.36655 |
| Plip          | -2.90053 | 0.00019 | 0.77843 | 1.78605 | 1.14315 | 1.36165 | 1.15877 | 0.7658  |
| Rec8          | -2.9031  | 0.04175 | 1.47514 | 2.40306 | 1.67527 | 0.76749 | 1.47821 | 1.74145 |
| B630019K06Rik | -2.90373 | 0.01699 | 0.44839 | 0.4681  | 0.55312 | 0.2534  | 0.41025 | 0.44602 |
| Otud3         | -2.90648 | 1.8E-06 | 2.15251 | 5.40878 | 4.23513 | 3.40087 | 2.68239 | 2.65649 |
| Myh14         | -2.9074  | 5E-10   | 14.2525 | 37.1625 | 33.3404 | 24.0088 | 16.6342 | 19.2399 |
| Rims2         | -2.90848 | 0.01744 | 0.18362 | 0.18432 | 0.25168 | 0.10089 | 0.175   | 0.19319 |
| Ccl27a        | -2.90928 | 0.02003 | 0.29235 | 0.86083 | 0.73463 | 0.85668 | 0.74301 | 0.41011 |
| Plp1          | -2.91118 | 0.00218 | 0.25037 | 0.25133 | 0.34317 | 0.19652 | 0.22272 | 0.20754 |
| Aldh1a7       | -2.91843 | 0.00033 | 3.08328 | 7.51812 | 9.60467 | 7.3219  | 4.2743  | 3.38869 |
| Ngef          | -2.92183 | 8.5E-08 | 1.03807 | 2.61996 | 2.54075 | 1.39679 | 1.44729 | 1.49781 |
| Ptpn2         | -2.92206 | 0.01628 | 0.25582 | 0.44331 | 0.15686 | 0.15218 | 0.22585 | 0.23695 |
| Lgr4          | -2.92845 | 8.7E-06 | 0.51178 | 0.75874 | 0.45865 | 0.63036 | 0.47025 | 0.24098 |



|               |          |         |         |         |         |         |         |         |
|---------------|----------|---------|---------|---------|---------|---------|---------|---------|
| Fbxl2         | -2.93059 | 1.5E-05 | 0.44305 | 0.98366 | 0.89304 | 0.49095 | 0.7551  | 0.59825 |
| Nr4a1         | -2.93325 | 0.00235 | 3.83879 | 11.9926 | 4.58785 | 6.46717 | 4.33087 | 4.08357 |
| Cldn7         | -2.936   | 6.3E-08 | 2.67549 | 6.54116 | 7.04904 | 5.15206 | 3.68701 | 3.13902 |
| Itih2         | -2.93711 | 0.00081 | 0.20963 | 0.72948 | 0.40704 | 0.43877 | 0.28415 | 0.29407 |
| Mtus2         | -2.93858 | 1.8E-05 | 0.18709 | 0.87328 | 0.55293 | 0.39649 | 0.39822 | 0.34894 |
| Dqx1          | -2.94379 | 0.00131 | 0.74525 | 1.06093 | 1.02147 | 0.80831 | 0.61988 | 0.69984 |
| Dnajb2        | -2.95726 | 4.6E-11 | 2.80757 | 6.87331 | 5.36127 | 4.86097 | 3.08974 | 3.04509 |
| D2Bwg1423e    | -2.95986 | 0.00377 | 0.36613 | 0.68605 | 0.71093 | 0.42149 | 0.58933 | 0.28015 |
| Isg20         | -2.96129 | 6.5E-08 | 2.17939 | 3.70034 | 2.77379 | 3.08891 | 2.4055  | 1.14349 |
| 3632451O06Rik | -2.96788 | 0.01217 | 0.12647 | 0.55861 | 0.47671 | 0.49636 | 0.27322 | 0.07258 |
| Ttc30b        | -2.97607 | 1E-06   | 0.80401 | 2.10688 | 1.74    | 1.16915 | 1.61321 | 0.71233 |
| Chchd10       | -2.97858 | 6.3E-06 | 3.33026 | 11.5889 | 10.228  | 9.13918 | 5.8934  | 3.39759 |
| Ift88         | -2.98009 | 2E-08   | 0.85088 | 2.91406 | 2.8127  | 1.69715 | 1.71729 | 1.24467 |
| Acsl3         | -2.98349 | 5.4E-10 | 1.16962 | 3.05261 | 2.33182 | 2.0364  | 1.72952 | 1.01699 |
| Zmynd12       | -2.9879  | 0.01917 | 0.37181 | 0.59717 | 0.38221 | 0.54477 | 0.22049 | 0.23708 |
| Oscp1         | -2.99062 | 1.4E-06 | 0.24248 | 0.90282 | 0.90643 | 0.67826 | 0.4482  | 0.37108 |
| Pisd-ps1      | -2.99067 | 0.00248 | 13.777  | 35.3613 | 24.6657 | 11.1759 | 14.5754 | 21.9912 |
| Klf5          | -2.9959  | 6.3E-07 | 2.96109 | 7.67416 | 5.44219 | 5.11323 | 3.31814 | 3.19261 |
| Rarb          | -2.99699 | 8.3E-07 | 0.61078 | 1.90064 | 1.7528  | 0.86293 | 1.22244 | 0.9639  |
| Usp2          | -3.00108 | 8.9E-05 | 1.08175 | 3.32036 | 2.50409 | 1.90193 | 1.09971 | 1.04844 |
| Fkbp4         | -3.00299 | 1.2E-08 | 5.42838 | 17.7698 | 16.1018 | 14.8835 | 7.56165 | 5.80235 |
| Rsph3a        | -3.00758 | 0.001   | 1.48147 | 2.93175 | 2.06682 | 2.15953 | 2.01706 | 0.76921 |
| Rasef         | -3.00961 | 6.4E-09 | 0.61504 | 1.53283 | 1.80228 | 0.98549 | 0.90555 | 0.92499 |
| Klrg2         | -3.0097  | 6.9E-06 | 0.60922 | 1.22308 | 1.15975 | 0.82885 | 0.53332 | 0.82871 |
| Tmem158       | -3.01092 | 0.00359 | 1.62363 | 1.14088 | 0.78817 | 0.93457 | 0.99724 | 0.82823 |
| Sntb1         | -3.01346 | 1.1E-11 | 1.33218 | 3.53361 | 3.40288 | 2.07862 | 2.33926 | 1.54445 |
| Ift57         | -3.02041 | 7.8E-08 | 2.10433 | 3.44476 | 2.93974 | 2.05829 | 2.13928 | 2.10559 |
| Gspt2         | -3.02409 | 0.00091 | 0.18379 | 0.39358 | 0.44084 | 0.30775 | 0.31141 | 0.11719 |
| Spata24       | -3.0254  | 0.00306 | 2.5152  | 3.36639 | 3.36535 | 1.80499 | 2.4961  | 2.38277 |
| Neur1a        | -3.02966 | 7.8E-08 | 0.49888 | 1.39165 | 1.33158 | 0.80789 | 0.72071 | 0.78354 |
| Aldh3b1       | -3.03579 | 2.5E-16 | 5.49755 | 13.8893 | 12.1494 | 8.80472 | 8.82285 | 5.2936  |
| Lmntd1        | -3.03639 | 0.03717 | 0.11957 | 0.15603 | 0.1434  | 0.12201 | 0.08357 | 0.13724 |
| Tmem231       | -3.03976 | 6.8E-07 | 0.6048  | 1.94274 | 1.5543  | 1.13931 | 0.92227 | 0.86769 |
| Dsg2          | -3.04167 | 2.6E-06 | 0.44826 | 1.03493 | 1.152   | 0.69489 | 0.75476 | 0.63239 |
| Chrm2         | -3.04223 | 7.6E-05 | 0.82277 | 2.18193 | 1.58667 | 0.82903 | 1.69232 | 0.64419 |
| Prodh         | -3.04253 | 1.5E-08 | 0.90353 | 1.69302 | 1.74295 | 1.09268 | 1.17368 | 0.87059 |
| Ppp2r2c       | -3.04378 | 0.0127  | 0.13013 | 0.18811 | 0.17837 | 0.17977 | 0.1323  | 0.03983 |
| Ccdc173       | -3.04783 | 0.00389 | 0.49805 | 1.78164 | 1.24117 | 0.62548 | 0.73647 | 0.97005 |
| Irx3os        | -3.05809 | 0.00532 | 0.34202 | 0.64919 | 0.44747 | 0.23429 | 0.30028 | 0.47582 |
| Gsg1l         | -3.05875 | 0.04552 | 0.05905 | 0.21338 | 0.24279 | 0.16685 | 0.10505 | 0.11295 |
| Elof1         | -3.07355 | 1.4E-08 | 4.89952 | 12.2409 | 9.74674 | 7.56319 | 5.67268 | 5.46719 |
| Gm15728       | -3.07666 | 0.03792 | 0.1301  | 0.28731 | 0.17832 | 0.06127 | 0.18185 | 0.1742  |
| Tctn2         | -3.07743 | 7.6E-07 | 0.50126 | 1.35297 | 1.23096 | 0.73443 | 0.63698 | 0.72448 |
| Sult5a1       | -3.08094 | 0.00023 | 0.41935 | 0.442   | 0.80828 | 0.64185 | 0.45296 | 0.42114 |
| Aoc3          | -3.08191 | 0.01191 | 0.22557 | 0.96611 | 0.79012 | 0.48788 | 0.45864 | 0.36438 |
| Iqck          | -3.08309 | 4E-06   | 0.21638 | 0.47786 | 0.46959 | 0.28307 | 0.26581 | 0.27595 |
| Espn          | -3.08396 | 1.8E-07 | 0.43404 | 0.5397  | 0.47017 | 0.30771 | 0.44125 | 0.28926 |
| Pxylp1        | -3.09217 | 1.2E-07 | 0.49787 | 1.4309  | 1.02359 | 0.72397 | 0.74588 | 0.6015  |
| Cfap52        | -3.09854 | 4.7E-06 | 1.09829 | 3.568   | 2.01854 | 1.41064 | 1.97929 | 1.37515 |
| Dync2h1       | -3.09855 | 9.5E-12 | 1.33191 | 3.60701 | 3.45205 | 1.83728 | 1.905   | 1.79973 |
| Slc23a2       | -3.10179 | 1.4E-13 | 5.84121 | 14.9029 | 16.202  | 9.47609 | 7.64861 | 7.46771 |
| Zfp474        | -3.10663 | 8.6E-06 | 1.01979 | 2.22285 | 2.03008 | 1.12825 | 1.3823  | 1.15188 |
| Tnk1          | -3.10674 | 2.8E-06 | 0.7654  | 1.62046 | 1.45442 | 0.8957  | 0.91959 | 0.74538 |
| Ccdc138       | -3.1096  | 0.00361 | 0.57171 | 1.07126 | 0.88156 | 0.50858 | 0.50856 | 0.72909 |
| D830026I12Rik | -3.11229 | 0.00026 | 0.54839 | 0.83673 | 1.20262 | 0.41322 | 0.80837 | 0.54549 |
| Hmgcs2        | -3.11787 | 4.6E-05 | 0.38724 | 1.63967 | 2.02654 | 1.19368 | 0.80523 | 0.75422 |

|               |          |         |         |         |         |         |         |         |
|---------------|----------|---------|---------|---------|---------|---------|---------|---------|
| Rassf9        | -3.12508 | 3.1E-12 | 3.11695 | 6.45527 | 7.04538 | 3.70842 | 3.9192  | 3.76575 |
| C530008M17Rik | -3.12946 | 0.00234 | 0.05013 | 0.19323 | 0.12368 | 0.10702 | 0.06625 | 0.09973 |
| Ccdc74a       | -3.13114 | 1.6E-05 | 0.65778 | 1.13772 | 0.8669  | 0.60367 | 0.74586 | 0.50331 |
| Barx2         | -3.133   | 0.00033 | 0.70621 | 1.27603 | 1.00829 | 0.92386 | 0.56837 | 0.63043 |
| Ccdc181       | -3.13512 | 2.3E-07 | 2.66948 | 9.54934 | 6.11201 | 4.11442 | 3.82402 | 4.03876 |
| Klf15         | -3.15097 | 0.0028  | 0.58096 | 5.89843 | 5.7731  | 4.61216 | 1.47653 | 1.71462 |
| Chrm3         | -3.1516  | 0.01276 | 0.20558 | 0.41273 | 0.35222 | 0.14523 | 0.16981 | 0.23595 |
| Etfbkmmt      | -3.15325 | 2.1E-07 | 1.29925 | 3.65178 | 3.62521 | 1.51513 | 2.12276 | 2.02379 |
| Gm17018       | -3.15495 | 1.9E-05 | 2.14803 | 5.68775 | 5.17217 | 2.98925 | 3.36408 | 2.39875 |
| Snhg11        | -3.16528 | 2.1E-12 | 0.84272 | 1.15701 | 1.15506 | 0.85349 | 0.75999 | 0.62402 |
| Col20a1       | -3.16613 | 0.00135 | 0.35909 | 0.79855 | 0.64362 | 0.32955 | 0.39313 | 0.48611 |
| Gipc2         | -3.1665  | 1.2E-08 | 0.96541 | 2.08355 | 1.92281 | 1.4208  | 1.1348  | 0.71561 |
| Arhgef19      | -3.16833 | 3.4E-05 | 0.87369 | 1.49094 | 1.55303 | 0.53147 | 0.99923 | 1.06545 |
| Crocc         | -3.16899 | 0.0036  | 1.56929 | 2.64421 | 2.09331 | 0.96781 | 1.26773 | 1.83331 |
| Tnxb          | -3.16969 | 3.3E-10 | 3.18742 | 8.71504 | 8.32802 | 5.40875 | 3.29822 | 4.31162 |
| Fhl2          | -3.17253 | 0.01357 | 1.16002 | 2.64758 | 0.96235 | 0.88176 | 1.27239 | 1.07447 |
| Rd3           | -3.17392 | 0.00487 | 0.10847 | 0.45731 | 0.37168 | 0.25542 | 0.20676 | 0.20749 |
| Pdzd7         | -3.17576 | 0.00109 | 0.16995 | 0.50041 | 0.50469 | 0.28457 | 0.23036 | 0.30342 |
| Ehf           | -3.18372 | 1.9E-12 | 0.99701 | 1.8515  | 1.89322 | 1.3434  | 1.04524 | 0.90591 |
| Sec14l4       | -3.19187 | 1.6E-11 | 1.49466 | 4.96117 | 5.1671  | 3.35788 | 2.34675 | 2.03316 |
| Fam131a       | -3.19387 | 1.1E-05 | 1.42085 | 3.09703 | 2.72645 | 1.24907 | 1.3619  | 2.05011 |
| 1110004E09Rik | -3.19461 | 7.9E-09 | 3.49161 | 8.61698 | 6.88677 | 4.65234 | 3.72275 | 4.3007  |
| Nectin4       | -3.19603 | 7.9E-11 | 1.08213 | 2.35873 | 2.66978 | 1.41725 | 1.47728 | 1.25384 |
| Tbc1d30       | -3.2017  | 3E-14   | 0.91581 | 2.07557 | 2.07812 | 1.17568 | 1.35515 | 0.91875 |
| Cfap53        | -3.20799 | 3.1E-06 | 1.15819 | 3.2553  | 2.77805 | 1.76221 | 1.40385 | 1.5679  |
| Ttc41         | -3.20936 | 0.0036  | 0.19943 | 0.92088 | 0.80296 | 0.34438 | 0.45617 | 0.41964 |
| 9230110C19Rik | -3.2098  | 0.00166 | 0.4365  | 1.22687 | 1.14672 | 0.50251 | 0.59167 | 0.83499 |
| Rassf7        | -3.21681 | 8.9E-09 | 1.3447  | 3.14567 | 3.68617 | 2.01915 | 1.72364 | 1.78941 |
| Ppp1r36       | -3.21835 | 0.00053 | 0.96852 | 1.87962 | 1.88061 | 1.01361 | 0.82051 | 1.35864 |
| Hspa2         | -3.22062 | 3.4E-12 | 2.11416 | 4.90879 | 4.28362 | 3.52087 | 2.28944 | 1.93418 |
| Aldh5a1       | -3.23348 | 0.00017 | 0.24612 | 1.10352 | 0.75901 | 0.50227 | 0.55254 | 0.40803 |
| Lhfp14        | -3.23509 | 0.00191 | 0.0797  | 0.512   | 0.35501 | 0.2252  | 0.15191 | 0.24392 |
| Lca5          | -3.24029 | 8.4E-09 | 0.69793 | 1.9174  | 1.5356  | 0.92263 | 0.84955 | 0.91347 |
| Rpgrip1l      | -3.24473 | 1.3E-10 | 0.84992 | 1.83545 | 1.6923  | 0.98805 | 1.08589 | 0.80852 |
| Bbs1          | -3.24598 | 4.7E-11 | 0.72633 | 1.44987 | 1.39376 | 0.71671 | 0.82279 | 0.84159 |
| Ppargc1a      | -3.24711 | 4.9E-05 | 0.36896 | 0.67725 | 0.42143 | 0.3751  | 0.26792 | 0.34953 |
| 2010204K13Rik | -3.24795 | 0.02313 | 0.21949 | 0.52879 | 0.70197 | 0.36754 | 0.26033 | 0.39188 |
| Calml4        | -3.25493 | 1.9E-05 | 1.0545  | 2.61102 | 1.98734 | 1.76574 | 1.07201 | 1.00858 |
| Aqp4          | -3.25722 | 3.2E-07 | 0.61533 | 1.22621 | 0.78092 | 0.72984 | 0.6603  | 0.40108 |
| Foxq1         | -3.25977 | 1.2E-06 | 1.04774 | 2.76957 | 2.36354 | 1.61736 | 1.1761  | 1.16914 |
| Kcnmb2        | -3.26993 | 2.8E-05 | 0.44432 | 1.07043 | 1.218   | 0.58125 | 0.52698 | 0.70828 |
| Adam33        | -3.27172 | 0.00109 | 0.8374  | 1.94846 | 1.70695 | 0.45842 | 0.89497 | 1.31436 |
| A730020E08Rik | -3.27706 | 0.02713 | 0.05947 | 0.14327 | 0.36681 | 0.11203 | 0.18138 | 0.09101 |
| Mall          | -3.28035 | 2.9E-05 | 1.03925 | 1.9937  | 1.38487 | 0.83385 | 0.93912 | 1.14862 |
| Lrrc73        | -3.28388 | 0.01186 | 0.58579 | 1.14245 | 0.4588  | 0.63057 | 0.38283 | 0.44823 |
| Misp          | -3.28411 | 5.8E-06 | 0.79169 | 1.27153 | 1.0532  | 0.81879 | 0.85218 | 0.4276  |
| Rhpn2         | -3.28789 | 8.1E-10 | 1.10389 | 2.25214 | 1.55393 | 1.18026 | 1.21322 | 0.89031 |
| Ccdc191       | -3.28973 | 8.8E-07 | 1.42378 | 2.70451 | 2.58947 | 1.35824 | 1.28042 | 1.48748 |
| Ccdc88c       | -3.28981 | 7.8E-07 | 5.9258  | 10.2688 | 8.92679 | 4.58499 | 5.01707 | 5.71338 |
| Ace2          | -3.2947  | 0.00187 | 0.12315 | 0.9642  | 1.39251 | 0.44463 | 0.39122 | 0.65959 |
| Tmem132d      | -3.30524 | 0.00142 | 0.05361 | 0.24397 | 0.28168 | 0.19076 | 0.109   | 0.09572 |
| Mettl7a3      | -3.30751 | 0.03378 | 0.21475 | 0.45987 | 0.49056 | 0.17979 | 0.47301 | 0.05477 |
| Irx2          | -3.31089 | 8.8E-15 | 2.01148 | 4.30753 | 3.74857 | 2.72557 | 2.02695 | 1.91714 |
| Fam198a       | -3.31099 | 4.1E-05 | 0.26928 | 1.20135 | 0.71766 | 0.48847 | 0.45625 | 0.48076 |
| Wnk4          | -3.31442 | 1.1E-05 | 0.55843 | 1.21082 | 1.53082 | 0.87664 | 0.53932 | 0.74776 |
| Akap6         | -3.31635 | 0.00028 | 0.49655 | 1.0875  | 0.63418 | 0.34014 | 0.55642 | 0.50946 |

|               |          |         |         |         |         |         |         |         |
|---------------|----------|---------|---------|---------|---------|---------|---------|---------|
| Grhl2         | -3.31792 | 3.8E-10 | 1.28314 | 2.63519 | 2.7534  | 1.53219 | 1.3793  | 1.40029 |
| Gstm1         | -3.31914 | 3E-07   | 11.637  | 26.8986 | 27.0504 | 21.2797 | 14.508  | 7.64074 |
| Rab36         | -3.31963 | 3.5E-05 | 0.73149 | 1.92795 | 1.79955 | 0.69487 | 1.04872 | 0.99025 |
| Ccdc67        | -3.32356 | 0.00038 | 0.41976 | 0.67418 | 0.86301 | 0.28555 | 0.48007 | 0.50854 |
| Celsr1        | -3.32922 | 2.4E-10 | 3.24923 | 5.80778 | 5.28674 | 3.26445 | 3.10073 | 2.94333 |
| Gsta3         | -3.33507 | 1.1E-09 | 4.31242 | 10.3893 | 12.7597 | 8.72543 | 5.1495  | 4.76624 |
| Aox1          | -3.35633 | 7.5E-09 | 1.57269 | 4.52735 | 4.79526 | 1.66542 | 2.31014 | 2.41692 |
| Wfdc2         | -3.35721 | 6.2E-11 | 38.708  | 91.5401 | 93.6462 | 62.0725 | 51.3833 | 32.1833 |
| Gas8          | -3.36165 | 5.8E-05 | 2.85795 | 5.70292 | 5.18338 | 2.32028 | 2.11303 | 3.09244 |
| Entpd2        | -3.37097 | 0.00705 | 0.32656 | 0.91785 | 0.96978 | 0.78604 | 0.5533  | 0.37481 |
| Rap1gap       | -3.37136 | 1E-08   | 1.42319 | 2.87894 | 3.50629 | 2.39819 | 1.3461  | 1.30953 |
| Stum          | -3.3751  | 0.00023 | 0.12563 | 0.34051 | 0.19372 | 0.19722 | 0.1357  | 0.09613 |
| Appl2         | -3.38219 | 1.9E-07 | 6.4636  | 9.55258 | 7.77852 | 4.86553 | 5.28447 | 5.33302 |
| Slc5a1        | -3.38983 | 0.00014 | 0.42332 | 0.4306  | 0.52219 | 0.40758 | 0.27255 | 0.23753 |
| Grhl1         | -3.39141 | 2.1E-09 | 0.59564 | 1.64758 | 1.47407 | 1.10128 | 0.7401  | 0.58236 |
| Smim5         | -3.39441 | 0.00265 | 1.47496 | 2.70735 | 2.50297 | 1.72003 | 1.46375 | 1.45103 |
| Tsga10        | -3.39695 | 7.9E-09 | 0.554   | 1.46553 | 1.39956 | 0.68211 | 0.70677 | 0.73144 |
| Sox6          | -3.39718 | 8.9E-07 | 0.12507 | 0.38024 | 0.34286 | 0.14025 | 0.19527 | 0.19824 |
| Pir           | -3.39763 | 2.1E-09 | 0.52143 | 2.12716 | 1.92965 | 1.11322 | 0.92235 | 0.79795 |
| Fsd1l         | -3.40045 | 3.6E-11 | 0.66597 | 1.68082 | 1.6952  | 1.03052 | 0.73748 | 0.76436 |
| Myh7          | -3.4031  | 1.6E-05 | 0.26979 | 0.68245 | 0.62862 | 0.27952 | 0.29484 | 0.41286 |
| Ttc26         | -3.4067  | 1.8E-10 | 0.54526 | 0.99517 | 0.98516 | 0.62252 | 0.56692 | 0.45515 |
| Gm26671       | -3.40953 | 0.00265 | 0.35991 | 0.98269 | 1.23327 | 0.3616  | 0.43907 | 0.88125 |
| Ccdc92        | -3.40953 | 1.1E-07 | 0.80636 | 2.01081 | 1.39608 | 1.22587 | 0.69032 | 0.81184 |
| Nap1l3        | -3.41135 | 0.00736 | 0.24495 | 0.49176 | 0.47562 | 0.20508 | 0.37352 | 0.18742 |
| Flt3l_1       | -3.41296 | 0.01123 | 2.03145 | 2.62712 | 2.20581 | 1.04368 | 1.15329 | 1.51402 |
| Pxmp2         | -3.41524 | 0.00948 | 0.48258 | 1.31762 | 0.79373 | 0.24242 | 0.83401 | 0.2954  |
| Alpk3         | -3.42857 | 0.03383 | 0.21564 | 0.34635 | 0.13547 | 0.13541 | 0.08221 | 0.22    |
| Cracr2b       | -3.43231 | 2.6E-06 | 5.57307 | 12.8543 | 9.39036 | 4.55197 | 4.74975 | 6.28424 |
| Plekhd1       | -3.43916 | 7.1E-06 | 1.05852 | 2.33761 | 2.57927 | 0.97855 | 1.01631 | 1.52988 |
| Morn4         | -3.44202 | 0.00073 | 0.31889 | 0.97311 | 0.69932 | 0.48057 | 0.48627 | 0.2928  |
| Fam149a       | -3.46045 | 2.6E-18 | 1.59509 | 4.06151 | 2.98615 | 2.03985 | 1.96765 | 1.414   |
| Gp5           | -3.4639  | 0.02564 | 0.31645 | 0.50824 | 0.54217 | 0.29806 | 0.13404 | 0.44391 |
| RP23-478P10.3 | -3.46902 | 0.04873 | 0.82336 | 1.5428  | 2.06896 | 1.20636 | 0.83703 | 0.63    |
| Ankrd66       | -3.473   | 4.5E-05 | 0.96443 | 2.53468 | 2.52359 | 1.32129 | 1.15871 | 1.27463 |
| Capsl         | -3.483   | 8.8E-07 | 2.57104 | 4.81757 | 4.11128 | 2.38321 | 2.11588 | 2.7167  |
| mt-Nd5        | -3.48366 | 0.01211 | 1145.81 | 990.511 | 1067.01 | 324.198 | 356.585 | 1180.83 |
| Homer2        | -3.48762 | 1.3E-05 | 0.10094 | 0.39795 | 0.44652 | 0.17287 | 0.16792 | 0.22469 |
| Pisd-ps2      | -3.48883 | 0.00476 | 4.28553 | 8.29489 | 7.56829 | 1.75951 | 4.24499 | 5.59134 |
| Synpo2        | -3.49711 | 3E-10   | 1.39286 | 3.43349 | 2.3743  | 1.36175 | 1.49665 | 1.43676 |
| Enah          | -3.50362 | 7.8E-14 | 1.84028 | 4.54875 | 4.61081 | 2.40654 | 2.14975 | 1.98944 |
| Col8a2        | -3.50444 | 1.1E-07 | 1.05783 | 3.39795 | 4.08446 | 1.6201  | 1.75735 | 1.57934 |
| Lmod1         | -3.5092  | 3.7E-08 | 0.93876 | 3.43953 | 2.69402 | 1.86052 | 1.10346 | 1.25703 |
| Adamts20      | -3.51047 | 0.0349  | 0.09011 | 0.22743 | 0.22055 | 0.04042 | 0.14396 | 0.12805 |
| Wdr34         | -3.51338 | 2.5E-06 | 0.88374 | 4.13985 | 3.29739 | 1.63395 | 1.52232 | 1.65295 |
| Tll8          | -3.51633 | 0.00272 | 0.16893 | 0.40698 | 0.50939 | 0.19094 | 0.18891 | 0.31022 |
| Sox2ot        | -3.51878 | 0.02772 | 0.05129 | 0.09267 | 0.03515 | 0.04831 | 0.03259 | 0.01962 |
| Nme5          | -3.52348 | 1.2E-07 | 1.70618 | 5.07759 | 3.50782 | 2.52084 | 1.83654 | 1.99665 |
| mt-Nd1        | -3.52544 | 0.009   | 1305.96 | 1031.45 | 1187.69 | 381.186 | 418.128 | 1266.52 |
| Alas1         | -3.52699 | 0       | 9.65348 | 30.1033 | 31.471  | 18.3409 | 12.8405 | 10.7518 |
| Lekr1         | -3.52737 | 3.2E-05 | 0.30139 | 0.67423 | 0.41309 | 0.28388 | 0.25168 | 0.32944 |
| Lrrc56        | -3.53254 | 1.2E-05 | 0.74439 | 1.67072 | 1.08569 | 0.41948 | 0.75675 | 0.86167 |
| Pglyrp1       | -3.53303 | 0.0019  | 0.93907 | 2.51375 | 1.35864 | 1.44142 | 1.00771 | 0.55887 |
| Lrrc45        | -3.53826 | 1.1E-05 | 6.40118 | 12.71   | 10.6779 | 4.5937  | 5.04152 | 7.32001 |
| MIph          | -3.54094 | 7.9E-05 | 2.70252 | 2.93419 | 2.60774 | 1.61553 | 2.11    | 1.68738 |
| Syt10         | -3.54132 | 0.0003  | 0.31387 | 1.20987 | 0.77437 | 0.31534 | 0.60626 | 0.48033 |



|               |          |         |         |         |         |         |         |         |
|---------------|----------|---------|---------|---------|---------|---------|---------|---------|
| Gria1         | -3.54154 | 0.00643 | 0.03833 | 0.49252 | 0.66987 | 0.37308 | 0.13639 | 0.19064 |
| Sptlc3        | -3.5417  | 0.0025  | 0.36639 | 0.65384 | 0.47428 | 0.30675 | 0.31039 | 0.1246  |
| Dusp18        | -3.54723 | 4.2E-10 | 1.00017 | 3.87536 | 3.4957  | 1.69569 | 1.77936 | 1.39665 |
| Adcy5         | -3.54864 | 8.7E-13 | 1.22315 | 3.61044 | 2.95652 | 1.76444 | 1.47031 | 1.37857 |
| Xk            | -3.55048 | 2.1E-05 | 0.25099 | 0.42143 | 0.32838 | 0.28655 | 0.20876 | 0.13967 |
| Ccdc160       | -3.55374 | 0.00045 | 0.45242 | 0.78718 | 0.87848 | 0.42613 | 0.57492 | 0.28848 |
| Osbpl6        | -3.55383 | 2.7E-15 | 1.26604 | 4.5751  | 4.35396 | 2.23317 | 2.06515 | 1.6116  |
| Lrig1         | -3.56094 | 1.9E-09 | 2.52998 | 3.54715 | 3.14081 | 1.75793 | 2.05549 | 1.91998 |
| Rab11fip4     | -3.56297 | 1.1E-09 | 1.08809 | 2.18447 | 2.0027  | 0.88821 | 1.3906  | 0.91582 |
| Morn2         | -3.56599 | 0.00145 | 0.71937 | 3.17731 | 1.60225 | 1.12929 | 1.27981 | 0.82566 |
| Ptgfr         | -3.56985 | 0.00391 | 0.06835 | 0.52144 | 0.3396  | 0.27897 | 0.11291 | 0.13075 |
| Cux2          | -3.57296 | 1.1E-06 | 0.1838  | 0.51661 | 0.53535 | 0.20919 | 0.25109 | 0.27249 |
| Mycl          | -3.58242 | 1.3E-07 | 0.60233 | 1.8657  | 2.61431 | 1.42283 | 0.8456  | 0.76813 |
| D630039A03Rik | -3.58442 | 3.1E-06 | 0.57296 | 1.18315 | 1.4304  | 0.61676 | 0.66568 | 0.65761 |
| Kif9          | -3.58881 | 7.9E-12 | 1.02399 | 2.20728 | 1.86521 | 1.01526 | 1.0547  | 1.01033 |
| Pacrg         | -3.59286 | 2E-05   | 0.73676 | 2.72163 | 1.61573 | 1.0178  | 0.93625 | 1.07111 |
| Map7          | -3.59606 | 9.4E-07 | 1.89403 | 4.17921 | 3.29962 | 1.86734 | 1.55659 | 1.85557 |
| Tmem125       | -3.59636 | 8.1E-06 | 0.5942  | 1.63034 | 1.49312 | 0.65295 | 0.62924 | 0.94721 |
| Lca5l         | -3.5977  | 0.00015 | 0.15985 | 0.85578 | 0.52339 | 0.27882 | 0.31598 | 0.28539 |
| Cd24a         | -3.59779 | 0       | 26.8    | 54.1108 | 37.5945 | 23.4246 | 23.2975 | 20.6438 |
| Ggnbp1        | -3.60061 | 0.00018 | 0.23354 | 0.58943 | 0.66306 | 0.19902 | 0.50027 | 0.54885 |
| Anxa8         | -3.60561 | 1.6E-08 | 3.38833 | 9.39981 | 5.06636 | 4.6421  | 3.78906 | 2.45121 |
| Ptprz1        | -3.60735 | 7.7E-10 | 0.5047  | 1.17369 | 0.70618 | 0.44237 | 0.52912 | 0.45054 |
| Myom1         | -3.61433 | 3.8E-05 | 2.02153 | 5.42769 | 2.79876 | 1.87201 | 1.24551 | 2.49987 |
| Ldhb          | -3.619   | 2.3E-09 | 5.01637 | 17.8316 | 20.3235 | 9.44978 | 8.66196 | 6.60421 |
| mt-Atp8       | -3.61904 | 0.00387 | 1208.72 | 832.063 | 1007.34 | 351.867 | 390.455 | 1055.19 |
| Gal3st1       | -3.62335 | 7E-06   | 0.45397 | 1.27596 | 1.82779 | 0.64139 | 1.00955 | 0.47762 |
| Irx5          | -3.63215 | 1.9E-10 | 0.85188 | 2.52822 | 2.46216 | 1.18613 | 1.07313 | 1.1903  |
| 0610040J01Rik | -3.63281 | 3.3E-09 | 0.96395 | 1.97397 | 1.84972 | 1.39218 | 1.10246 | 0.44255 |
| Ldb3          | -3.6333  | 0.00508 | 0.38504 | 1.46872 | 0.59371 | 0.44729 | 0.28379 | 0.58923 |
| Elf3          | -3.63852 | 4.8E-06 | 7.83621 | 9.39735 | 6.94558 | 3.51002 | 1.91192 | 3.79745 |
| Ccser1        | -3.64199 | 1.8E-08 | 0.80925 | 1.70711 | 1.29957 | 0.59916 | 0.75515 | 0.81329 |
| 2610528J11Rik | -3.64797 | 0.00288 | 0.28907 | 0.61903 | 1.32068 | 0.72605 | 0.48978 | 0.14746 |
| Ankmy1        | -3.65226 | 0.02796 | 0.3107  | 0.38386 | 0.57327 | 0.16508 | 0.14578 | 0.42061 |
| 6430531B16Rik | -3.65716 | 0.02354 | 0.52381 | 1.91626 | 1.19658 | 0.32891 | 0.91709 | 0.44533 |
| Mmp15         | -3.66037 | 9E-16   | 4.84994 | 11.5291 | 10.839  | 5.76743 | 4.9523  | 4.844   |
| Tyro3         | -3.66312 | 2.1E-09 | 0.74746 | 1.89079 | 1.99777 | 0.95044 | 0.80737 | 0.90079 |
| Synm          | -3.67258 | 1.4E-07 | 1.54757 | 4.86557 | 4.0622  | 3.19948 | 2.42669 | 2.18954 |
| Col26a1       | -3.67364 | 0.03179 | 0.03964 | 0.14324 | 0.12224 | 0.04978 | 0.07052 | 0.06066 |
| Acs1          | -3.67795 | 8.8E-14 | 1.27314 | 3.6472  | 4.29542 | 2.18309 | 1.81076 | 1.29264 |
| Asb14         | -3.68189 | 0.00097 | 1.5903  | 2.15281 | 2.55339 | 0.74181 | 1.03931 | 1.73834 |
| Gm12216       | -3.68558 | 0.00114 | 1.96897 | 1.44063 | 1.25941 | 0.8792  | 0.97859 | 1.13831 |
| Gdpd2         | -3.69344 | 0.00087 | 0.25129 | 0.98881 | 1.65324 | 0.63117 | 0.28101 | 0.82679 |
| Clmn          | -3.69625 | 9.3E-12 | 0.84236 | 1.72613 | 1.40671 | 0.83293 | 0.77268 | 0.71863 |
| Fam216b       | -3.70352 | 0.00458 | 1.74502 | 4.28408 | 4.33937 | 1.56535 | 1.5966  | 1.56412 |
| Cdc14a        | -3.7036  | 2.2E-09 | 1.73703 | 4.00425 | 2.68194 | 1.4757  | 1.55813 | 1.69657 |
| Ctxn1         | -3.72302 | 3.1E-07 | 3.63129 | 9.59247 | 6.54892 | 3.36029 | 3.49731 | 4.1678  |
| Wdr60         | -3.7313  | 8.6E-06 | 2.33193 | 5.79275 | 5.13527 | 1.93286 | 2.13359 | 2.97384 |
| 1700001C02Rik | -3.73327 | 0.00079 | 0.22316 | 2.15049 | 1.37641 | 1.12102 | 0.51045 | 0.59763 |
| Por           | -3.73879 | 0       | 9.27475 | 25.9758 | 24.8916 | 18.3398 | 9.20917 | 7.42729 |
| Ttc12         | -3.74069 | 4.6E-11 | 1.55445 | 2.59892 | 2.44493 | 1.10409 | 1.48959 | 1.2479  |
| Wnt11         | -3.74428 | 2E-08   | 1.20383 | 2.60793 | 2.39826 | 1.03719 | 1.23805 | 1.22102 |
| Cetn4         | -3.7472  | 1.8E-05 | 0.37342 | 1.5686  | 1.06303 | 0.54112 | 0.52564 | 0.54948 |
| Cfap69        | -3.7544  | 1.4E-11 | 1.27467 | 2.98851 | 2.74115 | 1.2052  | 1.28839 | 1.37892 |
| Klhdc9        | -3.75586 | 0.04676 | 0.37169 | 0.47758 | 0.61135 | 0.14004 | 0.18893 | 0.51193 |
| Tjp3          | -3.75604 | 7.2E-06 | 2.7576  | 3.53703 | 3.59593 | 1.70753 | 1.67425 | 2.31515 |

|               |          |         |         |         |         |         |         |         |
|---------------|----------|---------|---------|---------|---------|---------|---------|---------|
| Myom3         | -3.75868 | 0.00123 | 0.13427 | 0.12323 | 0.22347 | 0.06022 | 0.10725 | 0.11742 |
| Cdhr4         | -3.75993 | 7.2E-07 | 6.94765 | 12.8475 | 8.51895 | 4.64561 | 4.90594 | 5.40229 |
| 2310010J17Rik | -3.76447 | 0.03777 | 0.57621 | 0.46273 | 0.92141 | 0.24121 | 0.78105 | 0       |
| Gm37240       | -3.7743  | 0.00219 | 0.68215 | 1.11516 | 1.15203 | 0.7649  | 0.92877 | 1.30489 |
| D330023K18Rik | -3.7769  | 0.02263 | 0.27819 | 0.2234  | 0.63549 | 0.29114 | 0.28281 | 0.07095 |
| Sgsm1         | -3.78184 | 0.00047 | 0.58949 | 0.58551 | 0.47841 | 0.14611 | 0.36272 | 0.45106 |
| Pcsk1         | -3.79245 | 0.00381 | 0.10721 | 0.34437 | 0.29388 | 0.13464 | 0.18165 | 0.10937 |
| Klkb1_1       | -3.79425 | 0.00137 | 0.11033 | 0.35439 | 0.31755 | 0.15241 | 0.2131  | 0.08442 |
| Lrrc34        | -3.79477 | 0.00015 | 0.55123 | 2.16414 | 1.17527 | 0.61535 | 0.84057 | 0.74983 |
| Tekt2         | -3.79529 | 0.00056 | 0.79245 | 2.10493 | 2.25586 | 0.95692 | 0.65068 | 0.93285 |
| Foxc1         | -3.79612 | 7E-05   | 0.38089 | 1.34113 | 0.40158 | 0.53353 | 0.31275 | 0.3587  |
| 1700088E04Rik | -3.79762 | 6.8E-07 | 0.72223 | 1.12482 | 0.85492 | 0.72836 | 0.68972 | 0.50238 |
| Aim1l         | -3.80201 | 6.4E-05 | 0.40041 | 0.93786 | 1.21198 | 0.35619 | 0.37314 | 0.61276 |
| Dyrk3         | -3.80347 | 1.5E-06 | 0.29155 | 1.08286 | 1.04898 | 0.41192 | 0.64836 | 0.30674 |
| Sntn          | -3.80547 | 2.1E-06 | 1.21423 | 3.67534 | 2.04833 | 1.2903  | 1.28188 | 1.3579  |
| Muc4          | -3.81075 | 9.4E-08 | 6.45246 | 9.00262 | 7.46674 | 5.29503 | 4.32134 | 4.14573 |
| Stox1         | -3.81161 | 6.1E-05 | 0.25178 | 0.75822 | 0.75491 | 0.29644 | 0.27196 | 0.43347 |
| Prr36         | -3.81181 | 0.00204 | 0.28416 | 0.68459 | 0.71405 | 0.28252 | 0.31295 | 0.50734 |
| Slc2a4        | -3.81937 | 0.00504 | 0.33301 | 0.85574 | 0.41079 | 0.18819 | 0.38932 | 0.30576 |
| Grip1         | -3.82328 | 2.4E-06 | 0.29471 | 0.48516 | 0.41403 | 0.16655 | 0.21721 | 0.16912 |
| Atp7b         | -3.82344 | 5.4E-12 | 1.45998 | 4.51817 | 5.27119 | 3.18631 | 1.42088 | 1.59394 |
| Ryr2          | -3.82447 | 0.00454 | 1.0036  | 3.48872 | 1.5216  | 0.58271 | 0.587   | 1.6305  |
| Slc23a1       | -3.82558 | 2.4E-06 | 0.78691 | 1.95324 | 1.69139 | 1.03317 | 1.09088 | 1.42318 |
| mt-Cytb       | -3.8266  | 0.00402 | 2050.93 | 1958.55 | 2065.15 | 627.454 | 593.396 | 1972.66 |
| Dsc2          | -3.83561 | 0.00086 | 0.17558 | 0.22913 | 0.24066 | 0.09647 | 0.16734 | 0.10076 |
| Cbs           | -3.838   | 0.00042 | 0.06929 | 0.55644 | 0.47486 | 0.32632 | 0.15849 | 0.15906 |
| Gm20661       | -3.84394 | 0.01698 | 2.57376 | 4.69349 | 3.96865 | 1.2121  | 1.33551 | 2.17449 |
| Dcxr          | -3.84643 | 6.4E-18 | 7.39056 | 17.5611 | 18.7331 | 10.4258 | 8.07937 | 6.19724 |
| Wdr78         | -3.84883 | 1.7E-13 | 1.28389 | 3.1949  | 2.76996 | 1.31379 | 1.45829 | 1.21282 |
| mt-Nd6        | -3.85004 | 0.00575 | 970.962 | 937.613 | 1002.18 | 269.465 | 261.802 | 965.093 |
| Ugt1a6a       | -3.85095 | 2.7E-06 | 1.28927 | 2.63151 | 1.84075 | 1.93959 | 1.57008 | 1.27423 |
| Cpne5         | -3.858   | 0.01993 | 0.01931 | 0.05426 | 0.04631 | 0.04849 | 0.04907 | 0       |
| mt-Co1        | -3.85837 | 0.00689 | 4152.25 | 3010.95 | 3374.3  | 1030.97 | 1094.63 | 3485.4  |
| Atp6v1c2      | -3.86806 | 1.7E-07 | 2.294   | 3.5496  | 3.68106 | 1.89721 | 1.27981 | 2.14059 |
| Dedd2         | -3.88466 | 1.3E-14 | 2.26565 | 5.22503 | 3.45042 | 2.74806 | 1.65363 | 1.83731 |
| Asb2          | -3.88508 | 3.1E-05 | 0.58858 | 1.31294 | 0.69468 | 0.55438 | 0.46539 | 0.47538 |
| Tmem107       | -3.88798 | 5.3E-08 | 0.93061 | 1.97023 | 2.14522 | 1.27497 | 0.86006 | 0.77681 |
| Eva1c         | -3.88997 | 2.1E-11 | 0.73034 | 2.0283  | 1.54325 | 1.12739 | 0.7734  | 0.53554 |
| Fsd2          | -3.898   | 1.4E-05 | 0.40689 | 1.79716 | 1.15524 | 0.4745  | 0.6057  | 0.66716 |
| Inpp5j        | -3.89927 | 0.01802 | 0.2502  | 0.27398 | 0.07794 | 0.09998 | 0.11562 | 0.15663 |
| Kctd8         | -3.90078 | 4.8E-05 | 0.51506 | 0.52391 | 0.72949 | 0.30186 | 0.36653 | 0.34156 |
| Gfra4         | -3.90098 | 0.03234 | 0.10699 | 0.2148  | 0.25663 | 0.06718 | 0.16315 | 0.08187 |
| Synpo2l       | -3.90292 | 0.03923 | 0.07506 | 0.24111 | 0.13718 | 0.07856 | 0.07631 | 0.09572 |
| Zcchc12       | -3.9089  | 0.00994 | 0.15239 | 0.40793 | 0.2785  | 0.19138 | 0.1291  | 0.15547 |
| Atp8a2        | -3.91265 | 0.00102 | 0.1263  | 0.23183 | 0.09892 | 0.07931 | 0.10089 | 0.06903 |
| Rwdd3         | -3.91443 | 0.00268 | 0.18293 | 0.66107 | 0.68952 | 0.14359 | 0.31383 | 0.38493 |
| Nr4a2         | -3.9194  | 5.8E-06 | 0.37094 | 2.19976 | 1.2124  | 0.73461 | 0.49313 | 0.72049 |
| Wdr54         | -3.94017 | 1.8E-05 | 0.2471  | 0.69452 | 0.45964 | 0.36574 | 0.2512  | 0.44567 |
| Efcab1        | -3.9431  | 4.9E-08 | 0.92878 | 2.94614 | 2.57787 | 0.87481 | 1.3691  | 1.17261 |
| 6820408C15Rik | -3.94767 | 2.2E-05 | 2.46286 | 3.90355 | 2.66501 | 1.38371 | 1.58132 | 1.98367 |
| Cracr2a       | -3.9491  | 9.3E-07 | 3.3899  | 2.6866  | 2.49562 | 2.11003 | 1.7231  | 1.48381 |
| Cfap45        | -3.95363 | 8.9E-08 | 1.30184 | 4.36203 | 3.53794 | 2.11413 | 1.09528 | 1.30526 |
| Esyt3         | -3.95611 | 8.3E-07 | 0.27416 | 1.12083 | 1.00775 | 0.3443  | 0.43073 | 0.53397 |
| Casq1         | -3.95772 | 0.01137 | 0.23746 | 0.28603 | 0.44752 | 0.18638 | 0.21122 | 0.13627 |
| Plin4         | -3.96856 | 0.00016 | 1.04251 | 3.17166 | 2.39067 | 1.14559 | 0.55029 | 1.50334 |
| Kif21a        | -3.97854 | 3.5E-18 | 2.59363 | 5.88935 | 4.90335 | 2.68441 | 2.24575 | 2.2446  |

|               |          |         |         |         |         |         |         |         |
|---------------|----------|---------|---------|---------|---------|---------|---------|---------|
| Pih1h3b       | -3.97885 | 0.03382 | 0.23026 | 0.61636 | 0.2104  | 0.19278 | 0.19507 | 0.17618 |
| 2010007H06Rik | -3.98549 | 1.5E-05 | 1.64316 | 1.88506 | 1.38348 | 0.63381 | 0.87102 | 1.2034  |
| Jph1          | -3.99038 | 0.00168 | 0.32442 | 0.31636 | 0.46055 | 0.27647 | 0.32981 | 0.24824 |
| Barhl1        | -3.99579 | 0.00756 | 0.23727 | 0.23818 | 0.30489 | 0.05587 | 0.16583 | 0.20425 |
| Dnah7b        | -4.0012  | 1.7E-06 | 0.713   | 1.64325 | 1.58508 | 0.42951 | 0.62761 | 0.81613 |
| Gsto1         | -4.00932 | 8.1E-08 | 23.9524 | 28.5926 | 18.351  | 13.6362 | 15.9144 | 9.23131 |
| 1700029J07Rik | -4.01501 | 6.9E-06 | 1.14128 | 3.66603 | 2.83889 | 0.84936 | 1.39658 | 1.55248 |
| Magix         | -4.01527 | 1.5E-05 | 0.199   | 0.92689 | 0.87283 | 0.34989 | 0.32369 | 0.42635 |
| Rfx2          | -4.02172 | 1.2E-13 | 1.10534 | 3.05128 | 2.39089 | 1.2797  | 1.07103 | 1.16293 |
| Myo1h         | -4.02288 | 2.5E-06 | 0.66439 | 1.39662 | 1.25883 | 0.55216 | 0.55623 | 0.80741 |
| Pbx4          | -4.0259  | 0.00031 | 0.26121 | 1.17467 | 0.57283 | 0.26243 | 0.37176 | 0.43971 |
| Ift81         | -4.02981 | 3.3E-11 | 2.25989 | 6.03155 | 5.26116 | 2.58768 | 1.97646 | 2.41577 |
| Ttc39a        | -4.03229 | 1.6E-09 | 2.19641 | 3.20523 | 3.2047  | 1.39402 | 1.60864 | 1.64447 |
| Dnah7a        | -4.04593 | 3.1E-05 | 0.56245 | 1.52987 | 1.51074 | 0.35318 | 0.48879 | 0.76355 |
| Fam81a        | -4.06269 | 3.6E-07 | 0.34243 | 1.39608 | 1.48023 | 0.4962  | 0.53556 | 0.60464 |
| Rabl2         | -4.06276 | 2.3E-10 | 1.36948 | 3.29929 | 2.54744 | 1.22848 | 1.21323 | 1.34727 |
| Zdhhc1        | -4.06404 | 5.7E-11 | 5.07858 | 11.1108 | 10.4225 | 4.27497 | 4.1722  | 4.97821 |
| Mok           | -4.06512 | 4.5E-08 | 1.19051 | 2.34912 | 1.65506 | 0.81163 | 0.8299  | 1.09312 |
| BC049715      | -4.06527 | 0.02893 | 0.31794 | 0.54711 | 0.59141 | 0.1426  | 0.36939 | 0.31278 |
| Sptbn2        | -4.07164 | 9.7E-11 | 0.44918 | 1.01452 | 0.94274 | 0.50241 | 0.49232 | 0.55851 |
| Gm16136       | -4.07222 | 0.00077 | 0.49665 | 1.91441 | 1.42953 | 0.49898 | 0.55539 | 0.98805 |
| Caps2         | -4.07781 | 0.00252 | 0.20307 | 0.40769 | 0.25514 | 0.12752 | 0.17204 | 0.18128 |
| Obscn         | -4.07838 | 0.04361 | 0.89375 | 1.95042 | 0.29115 | 0.28438 | 0.2302  | 0.94147 |
| BC030870      | -4.10024 | 0.01061 | 0.15371 | 0.74061 | 0.5267  | 0.28955 | 0.23439 | 0.23522 |
| Tmem25        | -4.10262 | 0.01042 | 0.21635 | 0.23165 | 0.14827 | 0.18114 | 0.05499 | 0.08277 |
| Pla2g3        | -4.10686 | 0.02733 | 0.14798 | 0.21787 | 0.16902 | 0.07743 | 0.07522 | 0.15097 |
| Hs6st2        | -4.11138 | 3.3E-10 | 0.22253 | 0.54802 | 0.49818 | 0.2981  | 0.19606 | 0.19297 |
| Tnnt3         | -4.12611 | 0.00962 | 1.17063 | 1.41011 | 0.80225 | 0.41348 | 0.48347 | 0.89572 |
| AU022754      | -4.12744 | 0.00568 | 0.11675 | 0.68756 | 0.58676 | 0.14663 | 0.2176  | 0.35734 |
| Abcg4         | -4.12758 | 0.03534 | 0.06668 | 0.05355 | 0.13709 | 0.04187 | 0.03389 | 0.06803 |
| C2cd4b        | -4.13252 | 0.00202 | 0.78551 | 1.19152 | 1.61497 | 0.82207 | 0.6211  | 0.86817 |
| Gabre         | -4.13295 | 1.2E-07 | 0.31792 | 1.19796 | 0.90501 | 0.42997 | 0.34806 | 0.4678  |
| Rab44         | -4.13383 | 0.00011 | 0.81741 | 0.74697 | 0.44429 | 0.53098 | 0.25789 | 0.36665 |
| Ccdc189       | -4.13498 | 1.6E-06 | 1.08179 | 2.11753 | 1.4364  | 0.95525 | 1.04821 | 0.62081 |
| Cpxm2         | -4.13555 | 0.00031 | 0.35082 | 0.98603 | 0.39498 | 0.34617 | 0.43306 | 0.21091 |
| Bzrap1        | -4.13646 | 0.00048 | 0.80472 | 1.49809 | 1.46229 | 0.35219 | 0.57638 | 0.86764 |
| Pdlim3        | -4.13913 | 1E-09   | 0.40504 | 1.35528 | 0.87901 | 0.50867 | 0.46896 | 0.39601 |
| Smim22        | -4.14348 | 6.6E-07 | 2.06451 | 6.30005 | 6.22533 | 2.98165 | 2.93832 | 1.73766 |
| Ccdc57        | -4.14764 | 1.4E-06 | 0.99017 | 1.8885  | 1.67525 | 0.79663 | 0.67632 | 0.87602 |
| Pifo          | -4.15212 | 3.1E-06 | 2.15812 | 3.13605 | 3.73271 | 1.03249 | 1.8283  | 1.88722 |
| Arhgef38      | -4.15661 | 4.8E-18 | 1.01819 | 1.78295 | 1.29865 | 0.83471 | 0.79789 | 0.57349 |
| Cacna1g       | -4.15955 | 2.6E-05 | 0.10283 | 0.37618 | 0.18009 | 0.10762 | 0.13357 | 0.09617 |
| Ccno          | -4.16142 | 0.00171 | 0.30869 | 0.4462  | 0.59234 | 0.31013 | 0.21967 | 0.18896 |
| 2610028H24Rik | -4.16208 | 1.3E-08 | 3.66817 | 8.12803 | 7.96057 | 3.36972 | 3.72909 | 3.79431 |
| Hs3st6        | -4.16318 | 0.0167  | 0.19002 | 0.76299 | 0.9767  | 0.11932 | 0.33806 | 0.5816  |
| Lpar3         | -4.16586 | 4.2E-09 | 0.70507 | 1.88735 | 2.93139 | 1.15111 | 0.86013 | 0.86319 |
| Plch1         | -4.16825 | 1.7E-08 | 0.50957 | 0.94764 | 0.87304 | 0.24419 | 0.4635  | 0.47199 |
| Rph3al        | -4.16882 | 2E-13   | 1.27541 | 1.73141 | 1.7065  | 0.93434 | 0.83352 | 0.76677 |
| Hs6st3        | -4.16934 | 0.00023 | 1.39344 | 0.92153 | 0.89877 | 0.56616 | 0.62496 | 0.56446 |
| Fam19a5       | -4.17164 | 0.01159 | 0.13493 | 0.21672 | 0.27742 | 0.05649 | 0.13718 | 0.13766 |
| 2010109I03Rik | -4.17741 | 0.0271  | 0.07015 | 0.22534 | 0.14423 | 0.06607 | 0.10697 | 0.05368 |
| Fsip1         | -4.17743 | 0.00019 | 0.35186 | 1.3186  | 1.28604 | 0.55235 | 0.29808 | 0.71794 |
| C330002G04Rik | -4.18169 | 0.00018 | 0.33832 | 0.72451 | 0.73422 | 0.21244 | 0.31528 | 0.43145 |
| Mdm1          | -4.18441 | 1.1E-09 | 0.80915 | 2.09705 | 1.99126 | 0.83142 | 0.74781 | 0.9287  |
| Ccdc148       | -4.18775 | 1.2E-05 | 0.09991 | 0.4513  | 0.29955 | 0.12547 | 0.1587  | 0.14334 |
| Dnah11        | -4.19755 | 2.1E-10 | 1.6422  | 4.03994 | 3.65078 | 1.34306 | 1.51474 | 1.66723 |



|               |          |         |         |         |         |         |         |         |
|---------------|----------|---------|---------|---------|---------|---------|---------|---------|
| Acot1         | -4.20982 | 1.1E-05 | 0.52003 | 4.41478 | 5.70223 | 2.70566 | 1.54825 | 1.36427 |
| Enkur         | -4.21043 | 5.5E-07 | 1.03874 | 3.63455 | 2.54238 | 1.72381 | 1.01827 | 0.96512 |
| Ubxn11        | -4.21287 | 0.0005  | 2.36914 | 4.74654 | 3.41461 | 0.87419 | 1.5891  | 2.44819 |
| Ccdc65        | -4.21372 | 9.6E-09 | 1.16432 | 2.16528 | 1.88983 | 1.15438 | 0.71642 | 0.89089 |
| mt-Nd4        | -4.21381 | 0.00217 | 1689.88 | 1520.67 | 1603.41 | 446.86  | 420.857 | 1480.12 |
| Trpm3         | -4.21866 | 0.00093 | 0.02874 | 0.29999 | 0.30524 | 0.09022 | 0.10225 | 0.12093 |
| Cnn1          | -4.2204  | 8.6E-07 | 2.32824 | 7.78471 | 5.39597 | 3.93402 | 2.08718 | 1.84626 |
| Pcyt1b        | -4.22168 | 1.1E-05 | 0.34592 | 0.55559 | 0.45932 | 0.16291 | 0.30771 | 0.2316  |
| Cfap126       | -4.22216 | 6.3E-12 | 2.08918 | 5.24288 | 4.07156 | 3.03368 | 1.89158 | 1.09901 |
| Esrrg         | -4.22336 | 5.1E-06 | 0.14925 | 0.37455 | 0.42192 | 0.18744 | 0.15173 | 0.15703 |
| 9530053A07Rik | -4.22391 | 8.1E-06 | 0.07824 | 0.22775 | 0.12734 | 0.07369 | 0.08451 | 0.05986 |
| Nphp4         | -4.22651 | 1E-08   | 0.59404 | 1.09259 | 0.93241 | 0.33692 | 0.56495 | 0.43988 |
| Dnaja4        | -4.23542 | 3.2E-11 | 2.77527 | 10.6769 | 6.05968 | 4.33642 | 2.64093 | 2.568   |
| Traf3ip1      | -4.24233 | 3.9E-09 | 8.08113 | 17.3138 | 14.4975 | 5.66214 | 5.42403 | 7.85457 |
| Tmc5          | -4.24492 | 0.00061 | 1.68417 | 1.97669 | 0.76354 | 0.6996  | 0.89558 | 0.8525  |
| Egln3         | -4.24573 | 0.00023 | 0.56561 | 0.41927 | 0.50689 | 0.19124 | 0.48654 | 0.09987 |
| 4933406C10Rik | -4.24847 | 0.00408 | 0.2705  | 0.32584 | 0.21628 | 0.08493 | 0.20624 | 0.10349 |
| lqcg          | -4.25601 | 2.3E-10 | 1.47199 | 3.76118 | 3.46196 | 1.44948 | 1.05431 | 1.58708 |
| Htr1b         | -4.26446 | 7.1E-07 | 0.31872 | 0.84661 | 0.45366 | 0.29251 | 0.31155 | 0.15008 |
| Rgs11         | -4.26572 | 4.3E-06 | 1.23915 | 3.53813 | 3.4912  | 1.24496 | 1.17575 | 1.64346 |
| Vipr1         | -4.26581 | 8E-07   | 0.25959 | 1.10648 | 0.39686 | 0.30094 | 0.34511 | 0.22919 |
| Gck           | -4.26987 | 0.00234 | 0.5728  | 0.7973  | 0.65424 | 0.19183 | 0.29115 | 0.52594 |
| Adcyap1r1     | -4.27232 | 2.4E-06 | 0.10527 | 0.38043 | 0.31263 | 0.11017 | 0.1427  | 0.1611  |
| Rhov          | -4.27266 | 0.00327 | 0.27204 | 0.3823  | 0.55929 | 0.29893 | 0.13828 | 0.20815 |
| Ankrd42       | -4.27671 | 7.9E-07 | 1.43099 | 3.48395 | 3.06658 | 0.79872 | 1.22384 | 1.61634 |
| Bspry         | -4.27678 | 3.9E-14 | 1.57577 | 2.8472  | 2.59852 | 1.05131 | 1.60194 | 0.94197 |
| Hspa4l        | -4.27986 | 0       | 2.15098 | 8.32913 | 6.44838 | 3.57094 | 2.46629 | 2.12683 |
| Hcn4          | -4.28113 | 0.0071  | 0.03786 | 0.10642 | 0.14271 | 0.07132 | 0.04811 | 0.02897 |
| Cfap43        | -4.2895  | 3.9E-09 | 4.93293 | 9.37094 | 7.12802 | 3.41897 | 3.32944 | 3.8012  |
| Igsf11        | -4.29369 | 4.3E-05 | 0.20622 | 0.31051 | 0.47698 | 0.12949 | 0.20965 | 0.21697 |
| mt-Nd2        | -4.3007  | 0.00135 | 1089.46 | 1050.96 | 1138.44 | 299.102 | 271.5   | 951.177 |
| Pih1d2        | -4.308   | 8.6E-10 | 0.57642 | 2.08302 | 1.58012 | 0.64634 | 0.89992 | 0.53557 |
| F5            | -4.31    | 0.00581 | 0.56117 | 0.37554 | 0.17092 | 0.11746 | 0.22978 | 0.2624  |
| Mns1          | -4.31016 | 4.9E-11 | 0.69107 | 2.77482 | 2.02761 | 1.22047 | 0.83428 | 0.77665 |
| Rsph10b       | -4.31287 | 3.8E-06 | 2.61443 | 4.91887 | 4.22333 | 1.57132 | 1.12009 | 2.77207 |
| Syne4         | -4.31455 | 4.8E-05 | 1.17942 | 2.33627 | 1.85904 | 0.74059 | 0.89926 | 0.99269 |
| Cep126        | -4.31543 | 1.1E-15 | 1.68108 | 4.79551 | 3.71416 | 1.81185 | 1.41567 | 1.70867 |
| 2410004P03Rik | -4.3325  | 1.1E-09 | 2.22666 | 4.89104 | 4.48815 | 1.56268 | 1.7976  | 2.20487 |
| Gm13111       | -4.33402 | 4.8E-07 | 0.19619 | 0.73525 | 0.94118 | 0.24639 | 0.41552 | 0.27522 |
| Pi16          | -4.3445  | 1.3E-09 | 0.75528 | 2.51942 | 3.02601 | 1.36806 | 0.67923 | 0.978   |
| 1700012B09Rik | -4.35347 | 0.01823 | 0.28283 | 0.79495 | 0.96914 | 0.71039 | 0.07188 | 0.32462 |
| Phkg1         | -4.35389 | 0.00282 | 0.50169 | 0.46044 | 0.22103 | 0.15751 | 0.18215 | 0.1371  |
| Tspan1        | -4.3568  | 7.4E-16 | 4.97291 | 8.34642 | 6.81605 | 4.09066 | 3.71579 | 2.62551 |
| Efhc1         | -4.36724 | 3.3E-08 | 1.41627 | 3.53837 | 4.85297 | 1.51513 | 1.54644 | 1.60544 |
| Saxo2         | -4.37455 | 1.9E-10 | 0.65366 | 2.46908 | 1.57618 | 0.63848 | 0.82449 | 0.7595  |
| Chchd6        | -4.37765 | 2.1E-11 | 1.09911 | 1.98595 | 1.75757 | 1.12152 | 0.72163 | 0.63075 |
| Pnck          | -4.37797 | 0.00062 | 0.29381 | 0.61345 | 0.84568 | 0.11069 | 0.32856 | 0.44962 |
| Klhdc7a       | -4.3872  | 2.2E-12 | 1.24617 | 3.90763 | 2.56206 | 1.31349 | 1.13113 | 1.23731 |
| Sphkap        | -4.38831 | 0.00446 | 0.02412 | 0.11624 | 0.08266 | 0.04544 | 0.03066 | 0.03692 |
| Tctex1d4      | -4.39178 | 6.3E-07 | 1.66796 | 7.86932 | 3.64358 | 2.09472 | 2.38453 | 1.75486 |
| Elmod1        | -4.39302 | 8E-13   | 0.57036 | 1.43134 | 1.31922 | 0.5596  | 0.70667 | 0.38187 |
| Slc5a3        | -4.39534 | 0.00352 | 1.16743 | 4.50001 | 2.58928 | 2.65234 | 1.86653 | 1.2993  |
| Casc1         | -4.39617 | 1.7E-08 | 0.5     | 1.62437 | 1.27719 | 0.47095 | 0.42166 | 0.64344 |
| Rsph4a        | -4.40001 | 2.9E-13 | 1.49137 | 5.0454  | 4.52317 | 1.87295 | 1.64517 | 1.67529 |
| Tmem28        | -4.40494 | 0.03899 | 0.02963 | 0.19035 | 0.18275 | 0.11163 | 0.03012 | 0.06801 |
| Foxo6         | -4.4062  | 0.00034 | 0.08858 | 0.60465 | 0.60706 | 0.30592 | 0.15759 | 0.20334 |

|               |          |         |         |         |         |         |         |         |
|---------------|----------|---------|---------|---------|---------|---------|---------|---------|
| Cpe           | -4.40668 | 2.4E-06 | 2.04204 | 5.56127 | 2.89016 | 2.11851 | 1.82774 | 1.25679 |
| 1700007K13Rik | -4.40868 | 1.9E-07 | 0.84014 | 8.578   | 5.67537 | 3.08992 | 2.01322 | 1.92853 |
| Nov           | -4.41301 | 3.2E-07 | 0.76701 | 1.71818 | 1.79827 | 1.01396 | 0.63611 | 0.49422 |
| Fbxo36        | -4.41716 | 1.2E-06 | 0.59312 | 1.0392  | 0.9238  | 0.67715 | 0.43852 | 0.16503 |
| Morn1         | -4.41993 | 1.6E-09 | 0.50939 | 2.19604 | 1.61686 | 0.62289 | 0.72226 | 0.67696 |
| Agr3          | -4.42181 | 0.00043 | 0.59578 | 1.14825 | 1.79651 | 0.82303 | 0.66624 | 0.27352 |
| Ankrd45       | -4.42811 | 4E-07   | 0.3411  | 1.44431 | 0.97755 | 0.36996 | 0.39405 | 0.54572 |
| Efcab2        | -4.43864 | 1.9E-08 | 0.44642 | 1.45641 | 1.45323 | 0.54313 | 0.45384 | 0.59778 |
| Gm281         | -4.45085 | 3.2E-08 | 0.82392 | 2.237   | 1.96281 | 0.96081 | 0.67806 | 0.78053 |
| 1810010H24Rik | -4.46001 | 2.8E-10 | 2.47448 | 11.15   | 8.66743 | 3.40972 | 2.69026 | 3.78675 |
| D430036J16Rik | -4.46003 | 5.7E-06 | 0.46659 | 1.08246 | 0.604   | 0.58598 | 0.31623 | 0.07934 |
| lyd           | -4.46136 | 8.2E-06 | 0.28544 | 0.97421 | 1.07591 | 0.58253 | 0.32646 | 0.27301 |
| Ccdc96        | -4.46387 | 8E-08   | 0.61383 | 1.58257 | 1.35056 | 0.85202 | 0.39412 | 0.4944  |
| 1810041L15Rik | -4.46434 | 5.5E-07 | 0.10608 | 0.49692 | 0.36348 | 0.21093 | 0.18872 | 0.06764 |
| Ubxn10        | -4.46457 | 2.6E-20 | 1.47185 | 3.58666 | 3.00866 | 1.45006 | 1.49629 | 0.99028 |
| Foxa1         | -4.46725 | 3.5E-13 | 2.36143 | 5.19308 | 3.63502 | 2.28125 | 1.90205 | 1.36211 |
| Spata18       | -4.47166 | 5.1E-14 | 5.05713 | 13.8608 | 11.7157 | 4.48714 | 4.13524 | 5.29957 |
| Ak8           | -4.47598 | 5.4E-08 | 0.74203 | 1.2911  | 1.27132 | 0.69892 | 0.44004 | 0.52046 |
| Tst           | -4.48135 | 9E-11   | 3.48726 | 11.7958 | 10.2837 | 5.37484 | 3.59889 | 3.15347 |
| Mlxipl        | -4.48833 | 0.00125 | 0.10457 | 0.21833 | 0.28665 | 0.10506 | 0.07441 | 0.06401 |
| Gsto2         | -4.49794 | 0.00938 | 0.2987  | 0.41977 | 0.4094  | 0.23445 | 0.22774 | 0.28569 |
| Gfra1         | -4.50116 | 2.4E-09 | 0.65566 | 2.37787 | 2.75399 | 0.67733 | 0.87081 | 0.98719 |
| Lrrc51        | -4.50331 | 1.1E-08 | 4.40304 | 9.9158  | 8.59327 | 3.66636 | 3.45443 | 3.58877 |
| Pthlh         | -4.50648 | 0.03753 | 0.14307 | 0.28724 | 0.29416 | 0.31444 | 0.03636 | 0       |
| Wdr38         | -4.51148 | 0.01185 | 0.32273 | 0.74511 | 0.82939 | 0.30398 | 0.24607 | 0.40128 |
| Rsph9         | -4.51208 | 1.3E-12 | 1.44593 | 3.77376 | 3.31959 | 1.49811 | 1.17596 | 1.54892 |
| Ankub1        | -4.51517 | 0.00313 | 0.6296  | 0.52758 | 0.60032 | 0.08594 | 0.34786 | 0.41891 |
| Gjb2          | -4.51557 | 0.0006  | 0.09628 | 0.5412  | 0.49484 | 0.27204 | 0.17128 | 0.1105  |
| Proser2       | -4.51605 | 1.1E-09 | 0.20589 | 0.79752 | 0.4482  | 0.32701 | 0.22162 | 0.14827 |
| Spag17        | -4.52106 | 1.6E-10 | 1.32341 | 3.07874 | 2.62738 | 0.94238 | 1.01251 | 1.26317 |
| Cfap54        | -4.52525 | 2.7E-10 | 1.44594 | 3.51557 | 3.21915 | 1.03837 | 1.20601 | 1.38756 |
| Endog         | -4.52746 | 0.00061 | 5.22984 | 11.812  | 9.78162 | 3.55763 | 3.21217 | 6.33599 |
| St8sia6       | -4.53362 | 4.7E-09 | 1.26942 | 1.97813 | 1.30493 | 0.75915 | 0.96019 | 0.57816 |
| 4921536K21Rik | -4.53447 | 0.01353 | 0.08944 | 0.35911 | 0.42904 | 0.08424 | 0.09092 | 0.27373 |
| Efnb3         | -4.54404 | 0.00021 | 0.14555 | 0.55519 | 0.47379 | 0.27418 | 0.09248 | 0.22273 |
| 2010300C02Rik | -4.5483  | 1.3E-12 | 2.05394 | 5.7363  | 4.9266  | 1.94892 | 1.85604 | 1.92084 |
| Gm10069       | -4.54884 | 0.00194 | 0.07951 | 0.44695 | 0.23612 | 0.14978 | 0.10777 | 0.12168 |
| Cldn8         | -4.54885 | 0.02398 | 0       | 0.3553  | 0.43797 | 0.06174 | 0.22489 | 0.07523 |
| Wif1          | -4.55092 | 0.00098 | 0.09544 | 0.53651 | 0.39245 | 0.17979 | 0.1698  | 0.14606 |
| 4930451G09Rik | -4.55517 | 0.00455 | 0.105   | 0.29513 | 0.50373 | 0.16484 | 0.18681 | 0.08035 |
| Gabrp         | -4.56522 | 1E-08   | 1.88631 | 8.59304 | 9.61313 | 3.29497 | 2.23143 | 2.99163 |
| Fbxo16        | -4.57605 | 0.00566 | 0.37726 | 1.1361  | 0.51709 | 0.17767 | 0.28764 | 0.50517 |
| mt-Nd4l       | -4.58362 | 0.00253 | 1062.65 | 932.905 | 932.699 | 260.786 | 308.43  | 937.826 |
| Clstn3        | -4.5951  | 0.04513 | 0       | 0.14977 | 0.14379 | 0.07319 | 0.0474  | 0.01784 |
| Morn3         | -4.60805 | 3.7E-05 | 1.45523 | 2.40599 | 2.17058 | 1.07504 | 0.95726 | 1.11349 |
| Dnah7c        | -4.61526 | 1.1E-06 | 0.83627 | 2.01471 | 1.45482 | 0.4501  | 0.51383 | 0.80865 |
| Syngap1       | -4.62326 | 1.4E-07 | 3.24232 | 6.63271 | 5.9059  | 2.03595 | 2.06444 | 2.8204  |
| 4932411E22Rik | -4.62387 | 3E-11   | 0.56287 | 1.3711  | 1.27295 | 0.57729 | 0.42916 | 0.48811 |
| Adgb          | -4.62951 | 2.3E-11 | 1.38414 | 3.42474 | 2.70473 | 1.15103 | 1.02683 | 1.20222 |
| Wnk2          | -4.63301 | 0.00186 | 0.17753 | 0.2961  | 0.18718 | 0.0686  | 0.09024 | 0.14629 |
| Lrrc4b        | -4.64915 | 0.00016 | 0.11863 | 0.73035 | 0.43358 | 0.2483  | 0.22109 | 0.12103 |
| Lrriq3        | -4.6588  | 0.00589 | 0.11673 | 0.14998 | 0.08    | 0.04398 | 0.05933 | 0.05359 |
| Reep6         | -4.66317 | 5.1E-10 | 0.87812 | 2.78358 | 2.88226 | 1.30594 | 0.82223 | 0.88408 |
| 1700040L02Rik | -4.66961 | 2.1E-06 | 0.82597 | 1.98988 | 1.94973 | 0.92204 | 0.51314 | 0.84267 |
| Ltf           | -4.67352 | 1.2E-05 | 4.5992  | 11.4845 | 7.89128 | 3.49929 | 2.96916 | 3.95582 |
| Myb           | -4.67931 | 5.7E-10 | 1.77386 | 2.56409 | 3.47865 | 0.90822 | 1.01263 | 1.33641 |

|               |          |         |         |         |         |         |         |         |
|---------------|----------|---------|---------|---------|---------|---------|---------|---------|
| Adam28        | -4.68854 | 1.2E-14 | 1.82541 | 3.31091 | 3.06276 | 1.20552 | 1.18383 | 1.34857 |
| Klhl41        | -4.68891 | 0.00755 | 0.13739 | 0.55165 | 0.47078 | 0.11503 | 0.16295 | 0.24529 |
| Fam81b        | -4.69777 | 6.5E-07 | 0.32727 | 1.15637 | 0.62799 | 0.3699  | 0.23289 | 0.37562 |
| Cecr6         | -4.69923 | 0.00155 | 0.09515 | 0.15282 | 0.13041 | 0.07468 | 0.06046 | 0.0364  |
| Bdh1          | -4.70161 | 2.3E-08 | 0.36574 | 0.80771 | 0.58485 | 0.36363 | 0.34083 | 0.16325 |
| Ccdc121       | -4.70291 | 3.8E-06 | 0.95508 | 2.35206 | 2.05087 | 0.71967 | 0.64729 | 1.02311 |
| Nek11         | -4.71007 | 1.7E-06 | 0.79104 | 1.59907 | 1.1777  | 0.34256 | 0.41595 | 0.79312 |
| Srcin1        | -4.71201 | 1.4E-07 | 1.09058 | 2.00458 | 2.05948 | 0.54784 | 0.64058 | 1.01063 |
| Gm26840       | -4.71231 | 0.00919 | 0.23319 | 0.78027 | 0.47943 | 0.12202 | 0.19755 | 0.20817 |
| Col4a6        | -4.7198  | 3.1E-21 | 1.10401 | 2.74138 | 2.45894 | 1.11283 | 0.87129 | 0.87809 |
| Slc35g3       | -4.72348 | 0.00869 | 0.14316 | 0.28742 | 0.49056 | 0.17979 | 0.18193 | 0.05477 |
| Kcnd3         | -4.72472 | 5.3E-06 | 0.08457 | 0.36866 | 0.21526 | 0.07586 | 0.09211 | 0.1479  |
| Kcnh3         | -4.72838 | 1.9E-05 | 0.54952 | 0.98642 | 1.2184  | 0.24357 | 0.46006 | 0.51941 |
| Cdkl4         | -4.73106 | 1.8E-10 | 0.47418 | 1.99916 | 1.9498  | 0.7692  | 0.66283 | 0.57448 |
| Agbl2         | -4.73189 | 1E-13   | 0.41799 | 1.27275 | 1.21745 | 0.43745 | 0.47805 | 0.39979 |
| H2-M5         | -4.73766 | 0.00551 | 0.08608 | 0.51844 | 0.35395 | 0.1081  | 0.13126 | 0.19759 |
| Sh3bgr        | -4.75176 | 2.4E-06 | 0.60088 | 0.96507 | 1.3898  | 0.5188  | 0.5345  | 0.28736 |
| BC051019      | -4.75609 | 1.1E-12 | 2.12615 | 6.42523 | 5.44491 | 2.07287 | 2.13302 | 1.96935 |
| Spag6l        | -4.75973 | 3E-14   | 1.01618 | 3.34578 | 2.33296 | 0.82952 | 1.1751  | 0.93305 |
| Rsph14        | -4.77677 | 9.1E-07 | 0.34607 | 0.71023 | 0.84327 | 0.24145 | 0.31273 | 0.32365 |
| Hcar2         | -4.78391 | 1.6E-07 | 0.72012 | 1.10839 | 0.90477 | 0.37682 | 0.42705 | 0.45917 |
| Riad1         | -4.78431 | 4.4E-06 | 1.13967 | 2.28804 | 2.14785 | 0.71563 | 0.79654 | 1.09004 |
| Myo5c         | -4.80273 | 1.4E-13 | 6.03163 | 12.3251 | 12.1224 | 4.50742 | 3.74586 | 4.79796 |
| Frem2         | -4.80795 | 1.3E-06 | 0.2534  | 0.50521 | 0.32935 | 0.14265 | 0.10659 | 0.22732 |
| 4930562C15Rik | -4.80806 | 1.3E-08 | 2.89711 | 8.43148 | 6.82216 | 2.2432  | 2.17017 | 2.98346 |
| Spa17         | -4.81098 | 2.9E-05 | 1.63741 | 3.41879 | 2.99238 | 1.64508 | 0.8323  | 0.75173 |
| Map3k19       | -4.82178 | 5.6E-10 | 1.28082 | 3.16187 | 2.42199 | 1.02767 | 0.95245 | 1.01633 |
| Slc6a15       | -4.829   | 7.3E-06 | 0.15896 | 0.53615 | 0.50112 | 0.19963 | 0.17776 | 0.17028 |
| Tbx1          | -4.83268 | 2.6E-05 | 1.56424 | 6.33317 | 5.13669 | 1.14594 | 1.35831 | 2.54342 |
| Hspa1a        | -4.83644 | 0.00336 | 4.2549  | 18.0249 | 5.77842 | 8.55458 | 1.56752 | 3.49464 |
| Prom1         | -4.84227 | 6.6E-15 | 2.24374 | 5.05552 | 3.97141 | 1.7434  | 1.59178 | 1.66743 |
| Nr1i2         | -4.84401 | 0.01859 | 0.18146 | 0.4736  | 0.21763 | 0       | 0.1153  | 0.2777  |
| Dusp26        | -4.8447  | 0.02142 | 0.10049 | 0.20175 | 0.24105 | 0.0631  | 0.1277  | 0.03845 |
| Cfap44        | -4.84534 | 6.6E-06 | 5.23661 | 12.0682 | 11.0746 | 2.52611 | 3.02917 | 5.50944 |
| Sobp          | -4.8499  | 1.4E-06 | 0.41895 | 0.70652 | 0.45938 | 0.24992 | 0.31943 | 0.16028 |
| Spef2         | -4.85683 | 2.5E-12 | 1.35488 | 3.41419 | 2.6495  | 1.04879 | 0.97367 | 1.12608 |
| Dnah12        | -4.85696 | 7.5E-07 | 4.89494 | 10.2924 | 8.15402 | 2.0513  | 3.05577 | 4.32841 |
| Myh11         | -4.87224 | 0       | 12.0674 | 29.3948 | 23.9962 | 13.0605 | 7.5187  | 8.07099 |
| Mgst2         | -4.87224 | 3E-05   | 1.15725 | 1.15539 | 0.5573  | 0.3928  | 0.60413 | 0.40685 |
| Stmnd1        | -4.87356 | 3.2E-06 | 2.03937 | 2.72953 | 2.96993 | 0.90708 | 0.90704 | 1.62547 |
| Grb7          | -4.87697 | 8.6E-20 | 1.13582 | 2.37704 | 2.47672 | 1.10224 | 0.85726 | 0.76374 |
| 4930412C18Rik | -4.88521 | 6.8E-07 | 0.16955 | 0.42359 | 0.32276 | 0.16561 | 0.14364 | 0.1009  |
| 5330417C22Rik | -4.88578 | 1E-14   | 2.00258 | 6.60975 | 6.81167 | 3.20715 | 1.45684 | 1.78534 |
| Rsph1         | -4.88792 | 1.7E-12 | 3.88054 | 12.9445 | 9.4102  | 4.74845 | 3.23691 | 3.34992 |
| Stk36         | -4.88817 | 1.9E-09 | 1.25949 | 3.04875 | 2.66344 | 0.88126 | 0.82312 | 1.18399 |
| Gm1661        | -4.88827 | 0.00093 | 0.75238 | 1.13287 | 1.22459 | 0.47244 | 0.47805 | 0.43177 |
| Acss1         | -4.89228 | 3.3E-16 | 3.36684 | 8.04362 | 8.09497 | 2.30793 | 2.68116 | 3.17729 |
| Tmprss13      | -4.89739 | 0.00206 | 0.07138 | 0.25796 | 0.2446  | 0.08965 | 0.127   | 0.02731 |
| C230062I16Rik | -4.89855 | 0.00035 | 0.31409 | 1.57642 | 1.7758  | 0.39445 | 0.71843 | 0.54074 |
| Tll3          | -4.90116 | 4.2E-05 | 4.27343 | 7.73073 | 5.9203  | 1.88993 | 1.88024 | 3.56873 |
| Fxyd3         | -4.9071  | 4.6E-05 | 0.36421 | 0.60446 | 0.416   | 0.51838 | 0.22216 | 0.16721 |
| Ccdc162       | -4.90827 | 5.7E-07 | 2.15176 | 4.90963 | 3.93237 | 0.96511 | 1.23842 | 2.09944 |
| Scara5        | -4.91129 | 3.6E-05 | 0.19009 | 0.80904 | 0.83372 | 0.39389 | 0.13527 | 0.24726 |
| Prob1         | -4.91224 | 5.5E-09 | 2.6301  | 7.38285 | 6.36543 | 1.84494 | 1.74639 | 2.86458 |
| Rsg1          | -4.91433 | 0.00798 | 0.18492 | 0.2475  | 0.42242 | 0.11611 | 0.09399 | 0.18865 |
| Fam166b       | -4.91629 | 4.1E-08 | 1.11612 | 2.55102 | 3.35379 | 1.29387 | 0.91646 | 0.91971 |



|               |          |         |         |         |         |         |         |         |
|---------------|----------|---------|---------|---------|---------|---------|---------|---------|
| Ttc6          | -4.91643 | 1.1E-09 | 0.43333 | 1.01611 | 0.79587 | 0.25033 | 0.31718 | 0.35809 |
| Kif17         | -4.92297 | 0.00384 | 0.20222 | 0.20299 | 0.24252 | 0.09523 | 0.06424 | 0.13539 |
| Fam227a       | -4.92378 | 1.5E-09 | 0.70578 | 1.53031 | 1.30595 | 0.52074 | 0.42153 | 0.58054 |
| Tppp3         | -4.9238  | 1.4E-22 | 13.8507 | 31.9088 | 30.9675 | 13.6165 | 10.1623 | 9.49506 |
| Fam84a        | -4.93123 | 5.2E-09 | 2.19368 | 5.14727 | 3.19465 | 1.44204 | 1.49835 | 1.57361 |
| Mak           | -4.93377 | 3.4E-12 | 1.52693 | 2.84374 | 2.49362 | 0.9996  | 0.85871 | 1.14349 |
| Ccdc39        | -4.94312 | 8.6E-09 | 2.39637 | 5.46081 | 4.66022 | 1.38749 | 1.43164 | 2.22653 |
| Prom2         | -4.95325 | 0.00023 | 0.06699 | 0.2869  | 0.30605 | 0.0701  | 0.0908  | 0.13668 |
| Adamdec1      | -4.96114 | 7.3E-08 | 1.05073 | 1.76429 | 1.4729  | 0.62979 | 0.65547 | 0.62126 |
| 1700016K19Rik | -4.96429 | 1.9E-09 | 3.5211  | 9.59372 | 5.34324 | 3.63236 | 2.04548 | 2.40555 |
| Vwa3a         | -4.96769 | 1.3E-08 | 2.324   | 4.66573 | 4.37335 | 1.26792 | 1.4621  | 1.924   |
| Ttc29         | -4.96828 | 1.4E-08 | 0.98124 | 2.33769 | 1.97256 | 0.75992 | 0.51539 | 0.95103 |
| Agbl4         | -4.96852 | 0.00024 | 0.12066 | 0.21317 | 0.1323  | 0.05304 | 0.04293 | 0.11079 |
| Cfap61        | -4.96885 | 8.6E-11 | 0.75349 | 1.40311 | 1.36205 | 0.47314 | 0.44406 | 0.57654 |
| Chrm1         | -4.96923 | 0.02352 | 0.01785 | 0.10036 | 0.13459 | 0.02242 | 0.02723 | 0.06831 |
| Dixdc1        | -4.99045 | 5.3E-18 | 0.78986 | 1.57642 | 1.58412 | 0.54703 | 0.47824 | 0.6577  |
| Zdbf2         | -4.99271 | 8.2E-07 | 0.09149 | 0.18368 | 0.10659 | 0.07469 | 0.05116 | 0.042   |
| Gm973         | -4.99727 | 4E-08   | 0.99262 | 2.2048  | 1.62104 | 0.5172  | 0.72999 | 0.80799 |
| Adgrv1        | -4.99799 | 6.8E-07 | 0.21974 | 0.55943 | 0.49985 | 0.14386 | 0.14259 | 0.22538 |
| Cdr1          | -5.00695 | 4.6E-05 | 0.20029 | 0.56296 | 0.61769 | 0.15721 | 0.25452 | 0.19157 |
| Cadm4         | -5.01426 | 8.4E-09 | 1.44707 | 2.15198 | 1.17535 | 0.97597 | 0.79004 | 0.41009 |
| Btg4          | -5.02926 | 0.04072 | 0.13594 | 0.14555 | 0.15527 | 0       | 0.09213 | 0.10401 |
| Clic6         | -5.04656 | 6.6E-15 | 3.87642 | 9.02996 | 7.32081 | 2.67567 | 2.69238 | 2.96609 |
| Zmynd10       | -5.0601  | 2.4E-11 | 2.12163 | 4.32497 | 3.6909  | 1.43471 | 1.272   | 1.29039 |
| Slc7a3        | -5.06403 | 0.02842 | 0.03061 | 0.07374 | 0.18878 | 0.07688 | 0.04667 | 0       |
| Spag8         | -5.06536 | 7.3E-06 | 1.32405 | 2.12655 | 3.00872 | 1.00644 | 0.67302 | 1.06643 |
| Pclo          | -5.06897 | 6.8E-06 | 0.10315 | 0.36861 | 0.46301 | 0.1263  | 0.08651 | 0.14996 |
| Pde6h         | -5.08369 | 0.00339 | 0.17714 | 0.20152 | 0.23268 | 0.03708 | 0.09754 | 0.12424 |
| Kif6          | -5.09155 | 7.3E-10 | 0.65467 | 1.43804 | 1.21402 | 0.29018 | 0.66554 | 0.42726 |
| Fam161b       | -5.09454 | 2.1E-10 | 0.79601 | 1.57811 | 1.55132 | 0.57794 | 0.53106 | 0.57101 |
| RP23-163N19.1 | -5.09456 | 1.3E-06 | 0.13365 | 0.4293  | 0.53123 | 0.15106 | 0.14945 | 0.18407 |
| Ngb           | -5.09644 | 0.00092 | 0.13444 | 0.53981 | 0.46067 | 0.16884 | 0.20501 | 0.10287 |
| Retnlg        | -5.10301 | 0.03426 | 1.90492 | 2.29462 | 1.95821 | 0.71769 | 1.64607 | 0.43727 |
| Klk11         | -5.1048  | 0.01485 | 0.9474  | 1.14121 | 0.81158 | 0.34702 | 0.24078 | 0.18123 |
| Ddo           | -5.10878 | 3.4E-13 | 0.88243 | 2.10507 | 1.84092 | 0.5704  | 0.6926  | 0.70499 |
| Mapk15        | -5.11033 | 7E-05   | 6.37661 | 12.4568 | 10.1657 | 1.84584 | 2.68955 | 6.15949 |
| 1700095J03Rik | -5.12069 | 0.03675 | 0.06406 | 0.61731 | 0.70242 | 0.36202 | 0.06512 | 0.19606 |
| Spire2        | -5.12187 | 3.4E-08 | 1.61501 | 2.37153 | 2.11872 | 1.04309 | 0.68019 | 0.67083 |
| Lrrc6         | -5.12349 | 2.7E-08 | 1.16708 | 2.67779 | 2.5899  | 0.69795 | 0.70623 | 1.2332  |
| Ccdc150       | -5.12472 | 0.00197 | 0.55361 | 0.74096 | 0.86945 | 0.15933 | 0.26968 | 0.44125 |
| P2rx6         | -5.13372 | 1.9E-05 | 1.33359 | 3.86469 | 2.94048 | 0.60074 | 0.79576 | 1.59717 |
| Gpr155        | -5.1351  | 5.8E-17 | 1.2312  | 3.99663 | 3.4107  | 1.53532 | 1.27809 | 0.76958 |
| Cerkl         | -5.13951 | 0.00654 | 0.41646 | 0.38724 | 0.15021 | 0.05505 | 0.08913 | 0.28512 |
| Scgb3a2       | -5.14495 | 7.1E-09 | 42.2477 | 212.969 | 232.707 | 72.9742 | 56.3292 | 54.3808 |
| Shank2        | -5.1536  | 4E-13   | 1.53809 | 3.32544 | 2.98533 | 1.00633 | 0.90756 | 1.20158 |
| Mfsd4b1       | -5.15937 | 1.5E-05 | 0.6366  | 1.56775 | 1.27974 | 0.53299 | 0.25887 | 0.617   |
| Rbm24         | -5.16072 | 2.7E-08 | 1.00869 | 1.67792 | 1.20973 | 0.4298  | 0.49441 | 0.71668 |
| Stk33         | -5.17054 | 3.8E-12 | 0.69823 | 2.6634  | 1.52525 | 0.54805 | 0.73201 | 0.70122 |
| Gm867         | -5.17243 | 3E-07   | 5.88107 | 11.807  | 9.68597 | 3.0377  | 3.80904 | 4.20966 |
| Bpifb5        | -5.17405 | 0.00349 | 1.27352 | 0.79543 | 0.38789 | 0.31099 | 0.39559 | 0.43309 |
| Car11         | -5.183   | 0.01711 | 0.12027 | 0.33804 | 0.24727 | 0.11328 | 0.12227 | 0.04601 |
| 1700001L19Rik | -5.18887 | 9.9E-06 | 0.51247 | 1.0803  | 1.09752 | 0.36202 | 0.26049 | 0.53917 |
| Lrrc48        | -5.19071 | 2.1E-12 | 1.58902 | 3.88994 | 3.42503 | 1.35185 | 1.05523 | 1.19625 |
| Galntl6       | -5.20821 | 0.01994 | 0.28119 | 0.18818 | 0.06423 | 0.03924 | 0.07147 | 0.14344 |
| Diras2        | -5.21469 | 3.7E-17 | 0.66593 | 1.96798 | 1.71597 | 0.70251 | 0.62283 | 0.48917 |
| Fam179a       | -5.21673 | 6.6E-07 | 2.69778 | 6.63166 | 6.05459 | 1.55177 | 1.31895 | 2.74182 |

|               |          |         |         |         |         |         |         |         |
|---------------|----------|---------|---------|---------|---------|---------|---------|---------|
| 1700024G13Rik | -5.22309 | 4.2E-05 | 2.32802 | 4.44011 | 1.79487 | 1.64456 | 1.03543 | 0.89066 |
| Rapgef1l      | -5.22813 | 3.4E-05 | 0.40803 | 0.44235 | 0.29361 | 0.14092 | 0.13481 | 0.21855 |
| Spag16        | -5.23228 | 3.1E-17 | 0.92464 | 1.92508 | 1.95968 | 0.59136 | 0.67888 | 0.6944  |
| Tmem212       | -5.23237 | 3.1E-16 | 6.47035 | 15.1983 | 14.5221 | 4.67236 | 5.34446 | 4.8271  |
| Gm20755       | -5.23247 | 0.00518 | 0.19018 | 0.50908 | 0.26067 | 0.03981 | 0.16111 | 0.19402 |
| Tll10         | -5.2522  | 0.0005  | 1.27881 | 2.12391 | 1.61335 | 0.4015  | 0.48752 | 1.06745 |
| Lrrc10b       | -5.26102 | 6.6E-09 | 3.17848 | 7.38875 | 5.84692 | 1.71574 | 1.95576 | 2.68806 |
| Hepacam       | -5.26587 | 1E-06   | 0.17302 | 0.47241 | 0.71144 | 0.19556 | 0.17589 | 0.21182 |
| Dnali1        | -5.2709  | 4.8E-16 | 2.00905 | 6.19185 | 5.35851 | 2.28441 | 1.68362 | 1.53725 |
| Erich2        | -5.27184 | 1.2E-07 | 1.88579 | 4.32231 | 3.58094 | 0.91278 | 1.21817 | 1.38282 |
| Fhdc1         | -5.27358 | 1.3E-12 | 1.36693 | 5.54788 | 5.94981 | 1.97184 | 1.03283 | 1.75262 |
| Scn5a         | -5.27454 | 1.5E-07 | 0.75327 | 2.09068 | 1.73889 | 0.53939 | 0.36946 | 0.79884 |
| Ltk           | -5.27856 | 3.3E-05 | 0.16113 | 0.77637 | 0.57421 | 0.18212 | 0.18018 | 0.24658 |
| Dydc2         | -5.28121 | 0.0001  | 0.9782  | 2.04242 | 1.87706 | 0.61424 | 0.79556 | 0.59879 |
| Fbxl13        | -5.28592 | 4.9E-06 | 0.46407 | 1.25112 | 0.88596 | 0.22896 | 0.37068 | 0.40582 |
| Arhgdig       | -5.2882  | 9.4E-13 | 1.78074 | 3.71806 | 3.85637 | 1.43127 | 0.94136 | 1.3353  |
| Sox9          | -5.28996 | 0.00056 | 0.53218 | 0.26992 | 0.17276 | 0.12312 | 0.21356 | 0.10716 |
| Spata17       | -5.29849 | 3.5E-10 | 0.68604 | 1.94443 | 1.49343 | 0.70952 | 0.43077 | 0.55581 |
| Cidec         | -5.30346 | 0.03069 | 0.37442 | 0.50112 | 0.59872 | 0.35266 | 0.03172 | 0.23874 |
| Ovol2         | -5.3168  | 1.5E-05 | 0.4385  | 0.88035 | 0.71372 | 0.27535 | 0.30648 | 0.25164 |
| Eno4          | -5.33087 | 1.8E-16 | 1.30691 | 3.36568 | 3.45906 | 1.41491 | 0.98501 | 0.93103 |
| Il22ra1       | -5.33573 | 1.2E-05 | 0.36067 | 0.8327  | 0.80331 | 0.11324 | 0.34374 | 0.34496 |
| Rilp          | -5.33958 | 7.4E-13 | 1.97544 | 2.99649 | 3.35944 | 1.47014 | 1.0785  | 0.95171 |
| Ccdc114       | -5.34533 | 4.2E-06 | 2.15044 | 3.88173 | 3.63869 | 0.83648 | 0.92863 | 1.80561 |
| Bnpl          | -5.35387 | 0.00064 | 0.10084 | 1.05278 | 0.44922 | 0.25329 | 0.17941 | 0.15432 |
| Lrrc36        | -5.36471 | 0.00015 | 3.22603 | 6.93277 | 6.81941 | 1.48363 | 1.38575 | 3.16378 |
| Catip         | -5.36615 | 8E-07   | 2.93346 | 5.84722 | 4.98998 | 1.4144  | 1.38458 | 2.4049  |
| 1700030J22Rik | -5.37869 | 6E-11   | 0.85047 | 2.26623 | 1.90749 | 0.55831 | 0.6288  | 0.79865 |
| Ulk4          | -5.38046 | 3E-09   | 1.41658 | 3.36901 | 2.5297  | 0.92372 | 0.58851 | 1.20898 |
| 1810008I18Rik | -5.40636 | 0.00272 | 0.84849 | 0.68138 | 1.74446 | 0.2664  | 0.43129 | 0.64923 |
| Plin5         | -5.41503 | 6.7E-09 | 0.55496 | 1.87176 | 2.0157  | 0.62725 | 0.39492 | 0.76434 |
| Ccdc60        | -5.41645 | 0.00012 | 0.59104 | 1.81943 | 1.45143 | 0.30928 | 0.32546 | 0.69721 |
| Myl3          | -5.42498 | 0.01378 | 0.11333 | 0.72805 | 0.34949 | 0.1779  | 0       | 0.3035  |
| Erich3        | -5.44404 | 3.1E-08 | 2.67484 | 4.29606 | 3.29429 | 0.86009 | 1.14945 | 1.82916 |
| Pcsk4         | -5.44805 | 3.5E-05 | 0.39155 | 0.6603  | 0.59033 | 0.29504 | 0.13932 | 0.23968 |
| Dbp           | -5.4519  | 6.3E-18 | 5.06927 | 12.2126 | 10.4222 | 4.42238 | 4.05195 | 2.99054 |
| Tnni3         | -5.45748 | 0.0029  | 5.22113 | 10.5046 | 4.30915 | 1.23384 | 1.0844  | 4.55346 |
| Ccdc153       | -5.45801 | 1.6E-10 | 6.48496 | 18.1358 | 15.4769 | 4.21498 | 3.70114 | 6.35491 |
| Kcnk2         | -5.46415 | 4.6E-11 | 0.89038 | 3.63153 | 5.44354 | 1.04462 | 1.25055 | 1.21914 |
| Cyp2s1        | -5.47469 | 0       | 8.2795  | 20.4174 | 20.7032 | 5.86169 | 5.79414 | 6.56847 |
| Cdhr3         | -5.4775  | 6.8E-23 | 5.41248 | 13.0395 | 9.32693 | 4.18675 | 3.26952 | 3.39117 |
| Wdr66         | -5.49295 | 7.4E-16 | 2.59719 | 3.95051 | 3.72731 | 1.36224 | 1.25027 | 1.48461 |
| Zfp92         | -5.49526 | 0.00456 | 0.03435 | 0.09654 | 0.10592 | 0.02157 | 0.04365 | 0.02628 |
| Syt5          | -5.50082 | 3.7E-10 | 0.43797 | 2.11028 | 1.6675  | 0.70282 | 0.46998 | 0.48406 |
| Fam47e        | -5.50209 | 3.3E-08 | 1.26248 | 3.83495 | 4.66457 | 1.27529 | 0.94864 | 1.38601 |
| Dynlrb2       | -5.52601 | 3.1E-08 | 2.29139 | 14.2189 | 9.70748 | 4.83969 | 3.60005 | 1.59389 |
| Wdr31         | -5.53443 | 2.3E-09 | 0.56223 | 1.39376 | 0.83762 | 0.52189 | 0.34791 | 0.39279 |
| Ccdc87        | -5.5442  | 2.9E-05 | 0.25632 | 0.41167 | 0.47679 | 0.11496 | 0.1489  | 0.19613 |
| Rnf207        | -5.54456 | 0.00013 | 0.21953 | 0.27913 | 0.12537 | 0.05744 | 0.09299 | 0.09799 |
| Slc9a2        | -5.55001 | 2.9E-05 | 0.06633 | 0.17313 | 0.1932  | 0.06248 | 0.05901 | 0.05076 |
| 4930547M16Rik | -5.55262 | 0.0011  | 0.14477 | 0.42629 | 0.26458 | 0.0303  | 0.17171 | 0.11078 |
| Dnah3         | -5.55299 | 3.4E-07 | 5.04407 | 11.0661 | 9.04979 | 1.92174 | 2.65857 | 4.11973 |
| Dnah9         | -5.55804 | 1.6E-11 | 2.82486 | 6.93381 | 5.98196 | 1.41814 | 1.86407 | 2.28372 |
| Fam13a        | -5.56188 | 3.8E-17 | 1.44591 | 4.3212  | 5.01725 | 1.56302 | 0.98615 | 1.17638 |
| Jhy           | -5.56701 | 8.4E-05 | 0.17323 | 0.91812 | 0.61732 | 0.08702 | 0.24654 | 0.2916  |
| Ccdc40        | -5.58539 | 8E-13   | 2.17005 | 5.15087 | 4.501   | 1.50734 | 1.22994 | 1.61636 |

|               |          |         |         |         |         |         |         |         |
|---------------|----------|---------|---------|---------|---------|---------|---------|---------|
| Fstl4         | -5.60029 | 0.00041 | 0.13221 | 0.16988 | 0.19934 | 0.08302 | 0.05376 | 0.0607  |
| 1110017D15Rik | -5.60054 | 1.4E-13 | 1.79312 | 4.90897 | 4.58028 | 1.74011 | 1.32574 | 1.30966 |
| Stpg1         | -5.60664 | 6.1E-06 | 0.1517  | 0.54818 | 0.49381 | 0.19051 | 0.11566 | 0.23214 |
| Gm12963       | -5.60911 | 0.01293 | 1.31498 | 0.89353 | 0.55457 | 0.3811  | 0.15425 | 0.61918 |
| Dnaaf3        | -5.61237 | 6.4E-05 | 5.62431 | 7.52768 | 8.17285 | 1.27532 | 2.06473 | 3.22764 |
| Dydc1         | -5.61374 | 0.01368 | 0.2328  | 1.12171 | 1.11681 | 0.29237 | 0.355   | 0.2672  |
| Gm45396       | -5.61557 | 3.2E-08 | 11.5937 | 20.2358 | 14.5936 | 4.16003 | 5.95328 | 7.24172 |
| March4        | -5.61731 | 3.4E-12 | 1.01752 | 2.4105  | 1.74331 | 0.57504 | 0.74995 | 0.64232 |
| Cfap161       | -5.64649 | 3.7E-12 | 0.61761 | 1.80883 | 1.49384 | 0.61594 | 0.35086 | 0.55596 |
| Wdr93         | -5.64878 | 2.4E-10 | 0.86167 | 1.87238 | 1.49367 | 0.63655 | 0.43799 | 0.58175 |
| Gm28729       | -5.6491  | 8.1E-13 | 0.70765 | 2.55726 | 1.89945 | 0.66653 | 0.65945 | 0.67684 |
| RP23-312B17.1 | -5.65526 | 0.00787 | 0.11212 | 0.40517 | 0.30735 | 0.0704  | 0.08549 | 0.17158 |
| Dnah6         | -5.66055 | 7.8E-14 | 5.56932 | 15.4745 | 11.8098 | 3.34342 | 3.47531 | 4.52903 |
| Slc28a3       | -5.66271 | 1.3E-05 | 0.2205  | 0.22429 | 0.14104 | 0.06461 | 0.06725 | 0.10123 |
| Dcdc2b        | -5.66686 | 0.00013 | 1.01373 | 2.30656 | 1.44736 | 0.95483 | 0.64411 | 0.96959 |
| Zbbx          | -5.67694 | 3.7E-10 | 1.48878 | 2.29916 | 2.40683 | 0.71911 | 0.85377 | 0.81786 |
| Lrguk         | -5.70649 | 5E-17   | 0.97497 | 1.4579  | 1.9584  | 0.61221 | 0.68356 | 0.41159 |
| Wfdc13        | -5.71002 | 0.03105 | 0.5392  | 0.6062  | 0.59123 | 0.13543 | 0.27408 | 0.24754 |
| Osbp2         | -5.71329 | 0.00815 | 0.01821 | 0.17546 | 0.1123  | 0.05717 | 0.01851 | 0.0418  |
| Lsmp          | -5.72457 | 0.0417  | 0.00673 | 0.03242 | 0.02767 | 0.0169  | 0.00342 | 0.00515 |
| Ttc21a        | -5.72874 | 4.2E-09 | 6.38424 | 15.6741 | 13.2288 | 2.90203 | 2.90642 | 5.11526 |
| Tcp11         | -5.73727 | 7.9E-12 | 1.27457 | 2.35859 | 2.77236 | 0.69594 | 0.84504 | 0.89045 |
| Akap14        | -5.73936 | 1.7E-07 | 0.45242 | 3.21793 | 2.43611 | 0.77109 | 0.45993 | 0.93962 |
| Pcp4l1        | -5.74848 | 1.8E-16 | 6.5364  | 18.3422 | 11.5763 | 6.27189 | 3.91978 | 3.54033 |
| Efcab6        | -5.75245 | 1.1E-09 | 0.66874 | 1.64013 | 1.2882  | 0.46532 | 0.36749 | 0.48404 |
| Cfap99        | -5.75831 | 1.3E-06 | 0.87287 | 1.40192 | 0.93468 | 0.23979 | 0.41595 | 0.5844  |
| C130021I20Rik | -5.75866 | 0.00467 | 0.16785 | 0.29206 | 0.13421 | 0.01757 | 0.11376 | 0.08562 |
| Ppp2r2b       | -5.76286 | 1.2E-06 | 0.05813 | 0.58349 | 0.51787 | 0.1825  | 0.16251 | 0.08895 |
| Kndc1         | -5.76695 | 6E-09   | 1.31945 | 3.0311  | 2.37919 | 0.5365  | 0.70366 | 1.05924 |
| Drc7          | -5.77134 | 2.4E-15 | 3.10092 | 5.54067 | 5.1534  | 1.55772 | 1.47769 | 2.04646 |
| D130043K22Rik | -5.77148 | 3.1E-10 | 0.26342 | 0.8638  | 0.69203 | 0.20677 | 0.17853 | 0.30234 |
| Sgcg          | -5.77245 | 0.01858 | 0.18501 | 0.44573 | 0.29585 | 0.1549  | 0.18809 | 0.14157 |
| Gm32742       | -5.77896 | 0.00287 | 0.2312  | 0.29488 | 0.16777 | 0.03416 | 0.09678 | 0.13528 |
| Sbspon        | -5.80232 | 0.00256 | 0.33717 | 0.98153 | 1.09759 | 0.58223 | 0.25708 | 0.16125 |
| E230025N22Rik | -5.80255 | 0.00331 | 0.17235 | 0.55362 | 0.23623 | 0.21645 | 0.0584  | 0.08792 |
| Rgs22         | -5.81847 | 2.5E-08 | 3.85732 | 8.15374 | 6.08856 | 1.45327 | 1.66975 | 2.98956 |
| Ccdc170       | -5.82314 | 7.7E-10 | 2.29073 | 6.89225 | 5.52597 | 1.30416 | 1.53699 | 2.10334 |
| Ak9           | -5.83077 | 1E-09   | 1.4627  | 3.75078 | 3.09837 | 0.7306  | 0.87023 | 1.22095 |
| Amy1          | -5.84028 | 1.7E-07 | 0.36971 | 0.75573 | 0.36853 | 0.16884 | 0.25626 | 0.20574 |
| Trim66        | -5.84307 | 1.7E-06 | 0.05719 | 0.11023 | 0.1803  | 0.07183 | 0.02907 | 0.03501 |
| Mycbpap       | -5.84515 | 7.8E-13 | 1.76526 | 4.75735 | 3.32173 | 1.08967 | 0.97333 | 1.3965  |
| 4833427G06Rik | -5.85559 | 3.2E-07 | 2.1426  | 5.83096 | 3.50775 | 0.82219 | 1.33111 | 1.45728 |
| Efhb          | -5.85797 | 3.9E-08 | 1.13164 | 1.78258 | 1.28261 | 0.32796 | 0.53097 | 0.69937 |
| Gm45055       | -5.86375 | 0.01401 | 0.8043  | 0.25836 | 0.77168 | 0.10101 | 0.40883 | 0.12308 |
| Rhpn1         | -5.87678 | 7.2E-06 | 0.32938 | 1.02498 | 0.62076 | 0.23268 | 0.35578 | 0.12602 |
| Rp1           | -5.89003 | 8.4E-13 | 0.70558 | 2.10782 | 2.06314 | 0.47259 | 0.43994 | 0.70545 |
| Sspo          | -5.8982  | 0.00083 | 0.54029 | 0.99089 | 0.59043 | 0.16963 | 0.22639 | 0.34078 |
| Pon1          | -5.90222 | 9.4E-09 | 0.67941 | 2.95266 | 4.35483 | 1.30496 | 0.62975 | 0.82566 |
| Kif19a        | -5.90571 | 8.4E-09 | 2.16378 | 3.08657 | 2.49748 | 0.84025 | 1.04197 | 1.02389 |
| Gm15411       | -5.92332 | 6.4E-06 | 0.19923 | 0.47998 | 0.59166 | 0.0834  | 0.28693 | 0.22867 |
| Six4          | -5.92413 | 1.7E-20 | 0.55482 | 1.70509 | 1.43317 | 0.60298 | 0.40133 | 0.33473 |
| Nek5          | -5.92944 | 6.2E-12 | 1.95897 | 4.75156 | 3.94536 | 1.30541 | 0.97543 | 1.46834 |
| A430108G06Rik | -5.93988 | 2.4E-05 | 0.53905 | 1.29866 | 1.47769 | 0.29013 | 0.23486 | 0.70708 |
| Crocc2        | -5.94591 | 0.00083 | 1.99744 | 2.8299  | 2.49293 | 0.45887 | 0.53654 | 1.41654 |
| Kcnmb1        | -5.9468  | 0.01577 | 0.63561 | 1.39813 | 0.94695 | 0.46853 | 0.42141 | 0.25375 |
| Nme9          | -5.94776 | 7.4E-09 | 3.27527 | 7.27504 | 6.59053 | 1.61906 | 1.70026 | 2.55944 |



|               |          |         |         |         |         |         |         |         |
|---------------|----------|---------|---------|---------|---------|---------|---------|---------|
| Gas2l2        | -5.9555  | 3.4E-06 | 1.90813 | 3.813   | 4.22714 | 0.52942 | 1.21803 | 1.56189 |
| Tcte1         | -5.95568 | 1.8E-14 | 1.88385 | 3.26771 | 2.32387 | 1.18292 | 0.88096 | 0.83604 |
| Bcan          | -5.95643 | 0.00376 | 0.19949 | 0.04577 | 0.27343 | 0.12527 | 0.01449 | 0.06542 |
| Cfap70        | -5.97401 | 2.6E-12 | 0.93944 | 2.60812 | 2.17057 | 0.43821 | 0.65488 | 0.86259 |
| Ccp1os        | -5.98821 | 3.6E-05 | 1.14027 | 4.57848 | 2.56762 | 1.32973 | 1.07641 | 1.37106 |
| Actc1         | -5.99092 | 0.00012 | 10.5225 | 36.7896 | 20.4564 | 10.0235 | 2.87443 | 8.87301 |
| Ccdc89        | -5.99452 | 0.00057 | 0.27668 | 0.39994 | 0.26546 | 0.13899 | 0.14064 | 0.04234 |
| Ldlrad1       | -5.99866 | 1.2E-05 | 5.72208 | 11.2325 | 10.3119 | 1.92961 | 2.96242 | 4.21617 |
| Gm7173        | -6.00755 | 4.4E-16 | 0.37669 | 1.32343 | 0.95193 | 0.21436 | 0.39491 | 0.30624 |
| Fank1         | -6.01642 | 1.2E-13 | 1.20907 | 2.79147 | 1.89887 | 0.72758 | 0.61458 | 0.8095  |
| Katnal2       | -6.02053 | 5.8E-08 | 0.31372 | 0.7558  | 0.56681 | 0.14327 | 0.18846 | 0.26187 |
| 1700003E16Rik | -6.05943 | 8.5E-07 | 1.30368 | 2.88951 | 1.64392 | 0.55666 | 0.74219 | 0.75812 |
| Ppil6         | -6.07197 | 5.2E-08 | 3.26949 | 6.20588 | 6.58612 | 1.43088 | 1.35973 | 2.65331 |
| Tmem88b       | -6.07504 | 2.4E-06 | 0.1001  | 0.69669 | 0.48022 | 0.14667 | 0.13569 | 0.17872 |
| Dnah1         | -6.07519 | 3.9E-09 | 1.51162 | 3.33825 | 2.80568 | 0.68364 | 0.64488 | 1.14975 |
| Hydin         | -6.07999 | 2.6E-21 | 1.88783 | 5.36797 | 4.18934 | 1.33058 | 1.19786 | 1.30693 |
| Lrrc71        | -6.08428 | 1E-06   | 4.1473  | 7.41699 | 5.66701 | 1.42193 | 1.6425  | 2.72559 |
| Iqub          | -6.12312 | 9.9E-11 | 0.91996 | 2.19084 | 1.6305  | 0.53783 | 0.48374 | 0.6311  |
| Foxj1         | -6.13501 | 7.8E-14 | 18.0153 | 53.2592 | 35.1928 | 11.3955 | 10.4815 | 12.8049 |
| Smoc1         | -6.14016 | 0.00045 | 0.2319  | 1.01096 | 0.74923 | 0.20803 | 0.25259 | 0.20279 |
| Tcap          | -6.14459 | 0.03245 | 4.27602 | 11.4789 | 3.51652 | 0.61372 | 0.3726  | 4.39364 |
| Dlec1         | -6.14511 | 2.8E-09 | 2.1448  | 4.22261 | 3.14125 | 1.01009 | 0.82645 | 1.31025 |
| Wdr63         | -6.15867 | 2.6E-15 | 1.85395 | 5.02825 | 3.5719  | 1.16415 | 1.20908 | 1.20445 |
| Ccdc17        | -6.16934 | 1.9E-06 | 13.9681 | 27.6144 | 23.8651 | 3.38049 | 4.75803 | 9.94569 |
| Gm42984       | -6.17749 | 0.00213 | 0.35203 | 0.8481  | 0.48251 | 0.29474 | 0.11929 | 0.17958 |
| Ccdc187       | -6.17905 | 7.4E-09 | 3.17038 | 7.49596 | 7.01894 | 1.1767  | 1.6894  | 2.5972  |
| Ccdc78        | -6.21002 | 1.2E-06 | 6.24343 | 11.5486 | 8.07672 | 2.11439 | 2.49606 | 3.91841 |
| Dnaic1        | -6.21057 | 2.9E-08 | 1.16569 | 3.41009 | 1.99716 | 0.67968 | 0.61368 | 0.89194 |
| Efcab12       | -6.21227 | 6.6E-08 | 0.91333 | 1.64153 | 1.40087 | 0.46427 | 0.3095  | 0.63229 |
| Vwa3b         | -6.21318 | 2.6E-09 | 0.81714 | 1.36422 | 1.13474 | 0.31057 | 0.48094 | 0.37844 |
| Dzank1        | -6.23679 | 2.2E-13 | 0.67288 | 2.10513 | 1.69083 | 0.40491 | 0.45604 | 0.53631 |
| A830010M20Rik | -6.23992 | 0.0282  | 0.27407 | 0.27188 | 0.33146 | 0.23284 | 0.14751 | 0.23438 |
| Gm2568        | -6.24196 | 0.0241  | 0.39732 | 0.55837 | 0.20422 | 0.12474 | 0       | 0.30402 |
| Drc1          | -6.26528 | 1.6E-16 | 1.64038 | 6.55186 | 4.94047 | 1.32821 | 1.42625 | 1.5194  |
| Mgat3         | -6.27476 | 1.4E-14 | 3.2772  | 8.65289 | 8.35415 | 1.93313 | 2.04441 | 2.48859 |
| Ttl9          | -6.30247 | 1.1E-08 | 0.39812 | 1.30548 | 0.93219 | 0.33332 | 0.15177 | 0.40617 |
| Slc6a17       | -6.30742 | 9E-07   | 0.13516 | 0.29848 | 0.13122 | 0.06365 | 0.06298 | 0.06895 |
| 9030622O22Rik | -6.31025 | 2.2E-06 | 0.96401 | 1.93538 | 1.55726 | 0.25943 | 0.56001 | 0.68494 |
| A930001A20Rik | -6.31611 | 0.00377 | 0.16957 | 0.34044 | 0.40674 | 0.10648 | 0.12929 | 0.06488 |
| Meig1         | -6.32618 | 0.00045 | 0.5255  | 1.6036  | 0.50418 | 0.52796 | 0.21369 | 0.16084 |
| Lrriq1        | -6.33034 | 9E-11   | 1.48192 | 4.02272 | 3.44727 | 0.82569 | 0.74266 | 1.22973 |
| Gm1673        | -6.34676 | 2.7E-05 | 0.51937 | 2.78053 | 2.1356  | 0.54354 | 0.44    | 0.92727 |
| 9330158H04Rik | -6.36403 | 0.00036 | 0.0757  | 0.17224 | 0.2248  | 0.13468 | 0.13467 | 0.1255  |
| Cfap58        | -6.36783 | 4E-13   | 1.00411 | 2.19662 | 1.28136 | 0.47832 | 0.52799 | 0.52987 |
| Gm6225        | -6.39268 | 0.03874 | 0.20439 | 0.32827 | 0.51359 | 0.2139  | 0.38093 | 0.31278 |
| Gjb1          | -6.3963  | 0.00778 | 0.47495 | 0.21795 | 0.37199 | 0.17042 | 0.10346 | 0.10383 |
| Dner          | -6.40697 | 0.0001  | 0.02421 | 0.25274 | 0.28205 | 0.12162 | 0.04922 | 0.01852 |
| Lhb           | -6.4187  | 3.2E-05 | 0.6833  | 1.92053 | 1.75604 | 0.64359 | 0.26049 | 0.65354 |
| Nwd1          | -6.42486 | 4E-06   | 1.70337 | 1.90247 | 1.14722 | 0.4303  | 0.54736 | 0.69662 |
| 1700013F07Rik | -6.42534 | 9.9E-08 | 0.55836 | 1.47328 | 1.14796 | 0.20035 | 0.40545 | 0.48827 |
| Cfap77        | -6.42712 | 3.1E-15 | 0.97105 | 3.36731 | 2.05692 | 0.91462 | 0.6282  | 0.60792 |
| Hspa1b        | -6.42926 | 0.0005  | 7.35491 | 38.8891 | 14.555  | 14.7372 | 2.54136 | 3.82558 |
| Ankrd65       | -6.43716 | 7.2E-09 | 1.57696 | 4.36198 | 3.002   | 0.66015 | 0.9797  | 1.27367 |
| Tekt4         | -6.45478 | 1.3E-12 | 1.89    | 3.58193 | 4.19661 | 0.80701 | 1.26812 | 1.15693 |
| Ascl1         | -6.45625 | 0.01052 | 0.05127 | 0.41172 | 0.21082 | 0.09658 | 0.05212 | 0.07846 |
| Alox12e       | -6.46818 | 0.03918 | 0.32787 | 0.13165 | 0.08426 | 0.05147 | 0.02083 | 0.12544 |

|               |          |         |         |         |         |         |         |         |
|---------------|----------|---------|---------|---------|---------|---------|---------|---------|
| Lnx1          | -6.47351 | 1.3E-08 | 0.36297 | 0.43723 | 0.55969 | 0.18994 | 0.29213 | 0.2083  |
| Slco1a5       | -6.47979 | 6.4E-07 | 0.15559 | 0.29987 | 0.72506 | 0.11724 | 0.15817 | 0.11905 |
| Ak7           | -6.48704 | 3E-21   | 3.55733 | 8.90092 | 7.36503 | 2.02213 | 2.20791 | 2.17755 |
| Kif27         | -6.49093 | 4.2E-12 | 1.68719 | 4.33568 | 4.19812 | 0.84755 | 0.83122 | 1.52931 |
| Armc4         | -6.5049  | 8.2E-15 | 0.86606 | 1.92598 | 2.123   | 0.39741 | 0.60954 | 0.6117  |
| Ccdc180       | -6.53629 | 5.5E-07 | 4.20206 | 7.9089  | 6.88439 | 1.26433 | 1.2682  | 3.0478  |
| 4430402118Rik | -6.5481  | 9.5E-15 | 0.6838  | 1.40714 | 1.25942 | 0.33545 | 0.32586 | 0.32701 |
| Ribc2         | -6.56406 | 2.1E-05 | 0.42065 | 0.90081 | 0.52851 | 0.13207 | 0.21382 | 0.26822 |
| Gm10044       | -6.58051 | 3.1E-09 | 0.52765 | 1.09463 | 0.81362 | 0.2485  | 0.29056 | 0.40374 |
| Ckm           | -6.59066 | 0.04897 | 0.23856 | 1.11751 | 0.43597 | 0.04993 | 0.04042 | 0.33465 |
| BC021891      | -6.59243 | 1E-08   | 0.24413 | 0.44111 | 0.47403 | 0.14052 | 0.12409 | 0.12453 |
| Hmcn2         | -6.60724 | 4.1E-14 | 0.27382 | 0.81592 | 0.80494 | 0.20814 | 0.15017 | 0.23157 |
| Crnde         | -6.6723  | 1.1E-12 | 0.86132 | 1.56782 | 1.49538 | 0.32451 | 0.52538 | 0.43937 |
| Ccdc151       | -6.67409 | 3.8E-12 | 1.47423 | 2.9597  | 2.14692 | 0.57857 | 0.81961 | 0.74027 |
| 5330413P13Rik | -6.68279 | 8.1E-10 | 0.21177 | 0.95853 | 0.55413 | 0.14507 | 0.137   | 0.25042 |
| Slc44a4       | -6.68434 | 3E-19   | 2.27023 | 3.58645 | 3.36672 | 1.05163 | 1.21072 | 0.82583 |
| Mhrt          | -6.69488 | 0.04111 | 0.38161 | 1.22581 | 0.52305 | 0       | 0       | 0.36499 |
| Tsnaxip1      | -6.70383 | 1.5E-08 | 1.40418 | 3.717   | 3.56412 | 0.68579 | 0.74019 | 1.19381 |
| Cilp2         | -6.71556 | 0.03057 | 0.08054 | 0.17248 | 0.0184  | 0.03372 | 0.02729 | 0.02054 |
| Hsph1         | -6.72245 | 1.2E-09 | 4.90948 | 19.892  | 10.7928 | 7.66698 | 2.16331 | 1.87828 |
| Dnah5         | -6.72413 | 0       | 5.16481 | 12.776  | 8.9631  | 2.4847  | 2.46333 | 3.11845 |
| Armc2         | -6.72755 | 1.4E-10 | 0.85398 | 1.78564 | 1.42447 | 0.37436 | 0.38494 | 0.50549 |
| Armc3         | -6.73775 | 5.3E-12 | 0.61388 | 1.97191 | 1.48649 | 0.30838 | 0.47846 | 0.50103 |
| Rnf186        | -6.74333 | 3E-12   | 2.04005 | 4.84032 | 3.6223  | 1.28101 | 0.84843 | 1.27716 |
| Cfap57        | -6.76059 | 5.1E-19 | 1.21005 | 3.05401 | 2.15215 | 0.83219 | 0.45398 | 0.77157 |
| Cyp2f2        | -6.79358 | 3.3E-10 | 59.8828 | 279.531 | 287.742 | 95.7831 | 37.3869 | 46.9142 |
| Dnah2         | -6.80997 | 4E-09   | 1.76422 | 4.19434 | 3.80214 | 0.69966 | 0.82203 | 1.2611  |
| Ccdc81        | -6.8199  | 4.2E-11 | 0.95478 | 2.23354 | 1.36556 | 0.44313 | 0.52752 | 0.47645 |
| Fam83e        | -6.82622 | 2.3E-05 | 1.77812 | 2.12978 | 1.96212 | 0.39741 | 0.56681 | 0.87629 |
| Ccdc113       | -6.83358 | 1.9E-22 | 2.8775  | 5.99357 | 4.74512 | 1.69393 | 1.41693 | 1.30729 |
| Atp2c2        | -6.85736 | 1.3E-08 | 2.013   | 3.81041 | 2.09395 | 0.7223  | 0.65778 | 1.07269 |
| Ccdc108       | -6.87063 | 2.3E-07 | 7.94155 | 17.8236 | 15.0785 | 2.23286 | 2.72629 | 5.69112 |
| Gm14963       | -6.88154 | 0.00209 | 0.04528 | 0.50904 | 0.24823 | 0.02843 | 0.06904 | 0.13858 |
| Unc79         | -6.90826 | 6.1E-14 | 0.369   | 0.93527 | 0.75864 | 0.23895 | 0.15239 | 0.24705 |
| Frmpd2        | -6.91722 | 5.6E-10 | 1.70904 | 3.78507 | 2.41645 | 0.68908 | 0.63096 | 1.01863 |
| Ttc25         | -6.92918 | 1.3E-10 | 0.81019 | 1.7703  | 1.4462  | 0.3431  | 0.26816 | 0.59109 |
| Gm45123       | -6.93091 | 0.00144 | 0.72842 | 2.45683 | 0.69888 | 0.36592 | 0.37026 | 0.44589 |
| Ccdc146       | -6.94561 | 4.2E-12 | 1.8548  | 4.08549 | 3.66812 | 0.96502 | 0.9428  | 1.21648 |
| Gm12695       | -6.94728 | 1.5E-05 | 2.18986 | 3.51713 | 2.41787 | 0.84032 | 0.68024 | 1.02398 |
| Daw1          | -6.9724  | 2.9E-06 | 0.70357 | 1.47771 | 1.03852 | 0.20391 | 0.24759 | 0.53835 |
| Dnaic2        | -6.9795  | 1.3E-13 | 1.36914 | 3.82785 | 2.5195  | 0.74828 | 0.67016 | 0.87301 |
| Rbbp8nl       | -6.99049 | 0.02241 | 0.14983 | 0.12032 | 0.06845 | 0       | 0.07616 | 0       |
| Shisa9        | -7.03794 | 0.03124 | 0.04543 | 0.05472 | 0.1401  | 0       | 0.02309 | 0.05214 |
| 9130230L23Rik | -7.04427 | 8.8E-11 | 0.4025  | 1.55149 | 1.40678 | 0.22747 | 0.29666 | 0.43117 |
| Abcc8         | -7.05188 | 0.00251 | 0.10021 | 0.20694 | 0.04906 | 0       | 0.05094 | 0.05477 |
| Cfap206       | -7.05636 | 2.3E-24 | 2.56443 | 5.69135 | 4.69719 | 1.75667 | 1.30351 | 0.99894 |
| Mylk4         | -7.05715 | 0.03432 | 0.0756  | 0.60711 | 0.15543 | 0.0356  | 0.02882 | 0.13015 |
| Lrrc74b       | -7.08388 | 7E-16   | 1.44003 | 3.28044 | 2.85992 | 0.66433 | 0.61247 | 0.96693 |
| Timp4         | -7.11864 | 0.00232 | 0.1572  | 0.59965 | 0.404   | 0.17275 | 0.44948 | 0.19546 |
| Vtcn1         | -7.11915 | 1.8E-08 | 1.28099 | 2.41212 | 1.05952 | 0.55474 | 0.4266  | 0.50698 |
| Slc4a5        | -7.12699 | 2.1E-17 | 1.07757 | 3.65368 | 4.74542 | 1.02749 | 0.57816 | 1.03828 |
| Tex26         | -7.15435 | 8.4E-05 | 0.28043 | 0.99089 | 0.80718 | 0.21131 | 0.11404 | 0.30041 |
| Tekt1         | -7.17868 | 4.5E-22 | 1.92794 | 4.58736 | 3.76801 | 1.30028 | 0.94368 | 0.92882 |
| Bves          | -7.19417 | 0.0024  | 0.10049 | 0.14123 | 0.24105 | 0.04733 | 0.02554 | 0.07689 |
| Ccdc142       | -7.20255 | 0.00428 | 0.7123  | 0.38134 | 0.74849 | 0.44727 | 0.43447 | 0.18167 |
| Nek10         | -7.20922 | 3.9E-10 | 0.76983 | 1.18762 | 1.15234 | 0.25442 | 0.32952 | 0.35653 |

|               |          |         |         |         |         |         |         |         |
|---------------|----------|---------|---------|---------|---------|---------|---------|---------|
| Ppp1r32       | -7.21154 | 2.7E-08 | 0.79437 | 2.29651 | 1.30655 | 0.44893 | 0.44416 | 0.42548 |
| Pklr          | -7.21156 | 0.00419 | 0.25054 | 0.20119 | 0.09811 | 0.04495 | 0.09096 | 0.05477 |
| Fam161a       | -7.24035 | 4.6E-11 | 4.00467 | 11.1289 | 8.75703 | 1.63783 | 2.06237 | 2.74167 |
| Ankef1        | -7.26285 | 7.8E-08 | 0.17732 | 0.41423 | 0.38665 | 0.08098 | 0.06555 | 0.14801 |
| Wdr49         | -7.26879 | 4E-10   | 0.77731 | 1.19783 | 0.74867 | 0.26384 | 0.34172 | 0.24112 |
| Slc7a10       | -7.27282 | 2.5E-10 | 0.49378 | 1.14554 | 1.09039 | 0.55122 | 0.11155 | 0.29386 |
| Gm37381       | -7.27392 | 0.00209 | 0.42456 | 0.68188 | 0.17457 | 0.05332 | 0.17264 | 0.19491 |
| Adra2a        | -7.27428 | 0.00047 | 1.43212 | 0.70962 | 0.60558 | 0.4018  | 0.41819 | 0.20984 |
| Rac3          | -7.29755 | 5.4E-17 | 1.52276 | 4.38788 | 4.54261 | 1.40615 | 0.68296 | 1.09662 |
| Ooep          | -7.29832 | 0.00014 | 0.16252 | 0.30452 | 0.63112 | 0.06803 | 0.13768 | 0.12435 |
| Vwc2          | -7.30917 | 4.4E-05 | 0.05752 | 0.13857 | 0.15767 | 0.03612 | 0.03898 | 0.02934 |
| Gm29538       | -7.3168  | 0.00021 | 0.2459  | 2.96206 | 2.02224 | 0.61763 | 0.24998 | 0.75262 |
| Ect2l         | -7.3361  | 2.6E-14 | 0.76179 | 1.44199 | 1.32381 | 0.35876 | 0.30424 | 0.39553 |
| Crip3         | -7.33807 | 0.00716 | 0.0762  | 0.30595 | 0.41775 | 0       | 0.11619 | 0.11661 |
| Gm9800        | -7.35089 | 0.01538 | 36.3677 | 42.9427 | 20.1472 | 4.77415 | 0.38646 | 0       |
| Maats1        | -7.36401 | 4.4E-22 | 1.27723 | 2.50266 | 2.22328 | 0.64161 | 0.62325 | 0.56683 |
| Lgr6          | -7.38147 | 3.3E-11 | 1.42006 | 2.17215 | 1.29759 | 0.40339 | 0.45543 | 0.59503 |
| Fhad1         | -7.40847 | 7.9E-09 | 5.41282 | 10.7988 | 9.15096 | 1.98958 | 1.6489  | 3.2614  |
| Slc38a11      | -7.41674 | 4.1E-05 | 0.21453 | 0.27995 | 0.12864 | 0.03368 | 0.08178 | 0.06156 |
| Lrrc26        | -7.41706 | 1.4E-08 | 1.26525 | 4.92399 | 4.8691  | 1.2834  | 0.93996 | 0.89365 |
| A830018L16Rik | -7.41797 | 3E-14   | 0.13874 | 0.4659  | 0.37167 | 0.09504 | 0.08975 | 0.10616 |
| Cyp2b19       | -7.43523 | 0.00018 | 0.05556 | 0.31233 | 0.22847 | 0.03489 | 0.04236 | 0.10629 |
| Colq          | -7.43861 | 3E-10   | 0.36546 | 0.46468 | 1.14791 | 0.26773 | 0.20124 | 0.11651 |
| Cdh26         | -7.45885 | 0.03378 | 0.42298 | 0.92638 | 0.02635 | 0.09658 | 0.19546 | 0.11769 |
| Scin          | -7.54272 | 0.01965 | 1.0041  | 0.31013 | 0.29113 | 0.16975 | 0.1963  | 0.20685 |
| Gm11992       | -7.56708 | 6.9E-10 | 0.43432 | 1.12385 | 0.8268  | 0.36363 | 0.17171 | 0.22155 |
| Aldh3a1       | -7.58659 | 8.4E-11 | 1.6699  | 3.92724 | 2.41143 | 0.97368 | 0.75787 | 0.59324 |
| Calml3        | -7.59471 | 1.5E-05 | 2.76147 | 3.78296 | 1.50285 | 1.02    | 0.49541 | 0.93219 |
| Trp73         | -7.61653 | 7E-23   | 0.98365 | 1.88236 | 1.73548 | 0.59138 | 0.41489 | 0.3523  |
| Cnksr2        | -7.62335 | 2E-15   | 0.12498 | 0.48175 | 0.48821 | 0.10202 | 0.11435 | 0.09563 |
| 0610043K17Rik | -7.66172 | 0.04365 | 0.30083 | 0.36237 | 0.41233 | 0       | 0.15291 | 0.11509 |
| Gfy           | -7.70118 | 0.01124 | 0.06264 | 0.35211 | 0.30049 | 0.03933 | 0.03184 | 0.14379 |
| Aox3          | -7.71228 | 5E-24   | 2.66781 | 7.15451 | 9.42363 | 2.22325 | 1.1719  | 1.68849 |
| Cfap74        | -7.73369 | 1.7E-09 | 1.51306 | 3.71997 | 3.14269 | 0.59198 | 0.6981  | 0.89057 |
| Mdh1b         | -7.76682 | 5.9E-10 | 0.40426 | 1.94782 | 1.47757 | 0.42307 | 0.17124 | 0.51554 |
| Gm16194       | -7.78309 | 8.7E-08 | 1.10605 | 2.28398 | 1.84085 | 0.49609 | 0.40158 | 0.60451 |
| Bmpr1b        | -7.81811 | 2.6E-20 | 0.4468  | 1.73163 | 1.55764 | 0.35375 | 0.3456  | 0.31215 |
| Tll6          | -7.82229 | 1E-08   | 2.31218 | 3.13485 | 2.737   | 0.52796 | 0.61054 | 1.0799  |
| Dnah10        | -7.82361 | 2.3E-08 | 4.3416  | 9.69057 | 7.16459 | 1.23878 | 1.35046 | 2.59482 |
| D830044I16Rik | -7.85036 | 0.00019 | 0.89401 | 1.36408 | 0.88839 | 0.16841 | 0.15905 | 0.51305 |
| 1700007G11Rik | -7.8561  | 2.4E-08 | 2.31958 | 2.69776 | 2.68596 | 0.85383 | 0.60985 | 0.85683 |
| Kcnma1        | -7.86927 | 3.3E-11 | 0.25015 | 0.54908 | 0.29715 | 0.10472 | 0.1102  | 0.08932 |
| Cfap100       | -7.9001  | 5.5E-09 | 3.8775  | 7.15277 | 5.37241 | 1.05861 | 1.11401 | 2.02094 |
| Noxa1         | -7.92151 | 0.0063  | 0.07163 | 0.2876  | 0.63813 | 0.04498 | 0.10922 | 0.10961 |
| Gm31105       | -7.95408 | 0.00482 | 0.50576 | 0.54153 | 0.69321 | 0.31758 | 0.08569 | 0       |
| Atp2b2        | -7.96246 | 7.3E-16 | 0.37651 | 0.65634 | 0.98807 | 0.14416 | 0.1447  | 0.24593 |
| Sec14l5       | -7.99518 | 0.00114 | 0.8425  | 0.79597 | 0.88305 | 0.12448 | 0.10076 | 0.45505 |
| Ccdc24        | -8.00209 | 3.1E-10 | 0.9542  | 2.56804 | 1.87342 | 0.92304 | 0.61611 | 0.65119 |
| Ccdc30        | -8.03181 | 2.3E-10 | 1.75298 | 3.91349 | 3.44786 | 0.56138 | 0.60591 | 1.14012 |
| Acp7          | -8.03311 | 0.00779 | 0.31134 | 0.58339 | 0.10668 | 0.03258 | 0.13188 | 0.07941 |
| Ckmt2         | -8.04161 | 0.00286 | 0.7794  | 1.75252 | 0.53414 | 0.09788 | 0.27732 | 0.41746 |
| Col19a1       | -8.05422 | 0.00066 | 0.05045 | 0.09453 | 0.0922  | 0.03168 | 0.00855 | 0.02574 |
| Iqca          | -8.08127 | 1.8E-19 | 0.8122  | 2.52197 | 2.245   | 0.578   | 0.31651 | 0.58003 |
| Gm12576       | -8.09242 | 0.00716 | 0.11445 | 0.24508 | 0.02614 | 0.02395 | 0.03878 | 0.02919 |
| Tas1r1        | -8.10889 | 2E-07   | 0.32363 | 0.61724 | 0.91488 | 0.10161 | 0.20563 | 0.18572 |
| Slc16a11      | -8.10911 | 1.2E-10 | 6.07665 | 12.928  | 11.4988 | 1.70853 | 1.6366  | 3.88626 |



|               |          |         |         |         |         |         |         |         |
|---------------|----------|---------|---------|---------|---------|---------|---------|---------|
| Lrrc46        | -8.11309 | 6.3E-09 | 0.69353 | 1.74043 | 1.60409 | 0.54436 | 0.1322  | 0.46433 |
| Gm29266       | -8.11883 | 0.00038 | 1.73729 | 2.01519 | 1.98432 | 0.36363 | 0.19624 | 1.03391 |
| Defb23        | -8.11907 | 0.03856 | 0.37122 | 0.59621 | 0.8904  | 0       | 0.09435 | 0.42606 |
| Cfap46        | -8.13007 | 7E-10   | 3.60365 | 7.82466 | 7.22824 | 1.04863 | 1.34669 | 2.06564 |
| Dcdc5         | -8.13699 | 3.2E-10 | 1.06412 | 2.40412 | 1.7794  | 0.32964 | 0.41829 | 0.56453 |
| Ccdc33        | -8.20266 | 4.4E-07 | 2.55834 | 2.82055 | 1.79785 | 0.42204 | 0.57306 | 0.7797  |
| Fmo3          | -8.20974 | 1.3E-12 | 1.58393 | 5.97445 | 8.81556 | 2.10975 | 0.63434 | 1.28542 |
| Ces1b         | -8.21248 | 0.0334  | 0       | 0.09471 | 0.32331 | 0.07406 | 0.02998 | 0       |
| Plch2         | -8.25145 | 3.5E-06 | 0.71388 | 0.92871 | 0.95889 | 0.08069 | 0.14515 | 0.40421 |
| T2            | -8.25513 | 4E-06   | 2.35564 | 2.36463 | 2.73545 | 0.32871 | 0.63195 | 0.90123 |
| Ttc16         | -8.2595  | 6.5E-12 | 1.34167 | 3.26142 | 2.36081 | 0.43262 | 0.47923 | 0.77689 |
| Cbr2          | -8.36553 | 0       | 192.625 | 478.57  | 597.241 | 157.29  | 61.4888 | 78.5364 |
| Fn3k          | -8.3914  | 1.5E-07 | 0.21063 | 0.23257 | 0.30674 | 0.0496  | 0.06691 | 0.08058 |
| Ccdc155       | -8.41143 | 4.8E-06 | 0.68561 | 1.96636 | 1.07397 | 0.30751 | 0.24893 | 0.37472 |
| Rab39b        | -8.44769 | 0.00934 | 0.06811 | 0.21878 | 0.11669 | 0.14969 | 0.05193 | 0       |
| Kcnip4        | -8.48485 | 0.01049 | 0.06387 | 0.20515 | 0.28449 | 0.24062 | 0.48694 | 0.04887 |
| Gm43634       | -8.48516 | 0.02061 | 4.97594 | 2.75581 | 4.11563 | 0       | 1.39547 | 1.3129  |
| Lrrc23        | -8.48595 | 4.9E-08 | 8.88348 | 26.5509 | 17.852  | 2.4326  | 2.68214 | 6.38845 |
| Ky            | -8.50915 | 1.4E-07 | 0.70922 | 1.53459 | 0.85057 | 0.16082 | 0.21029 | 0.37685 |
| Dnaaf1        | -8.54096 | 3.7E-16 | 0.98535 | 3.5278  | 2.3916  | 0.54139 | 0.54259 | 0.65971 |
| Gm12474       | -8.58365 | 1E-05   | 0.65713 | 1.12138 | 0.84439 | 0.25789 | 0.16701 | 0.25141 |
| Ces1e         | -8.59765 | 4.4E-11 | 0.5291  | 1.52961 | 1.48666 | 0.33223 | 0.21515 | 0.36436 |
| Bbox1         | -8.63934 | 8.1E-07 | 0.15783 | 0.29573 | 0.1983  | 0.01652 | 0.08022 | 0.06038 |
| Pm20d2        | -8.64263 | 2.7E-08 | 0.56836 | 0.7607  | 0.95213 | 0.15862 | 0.2247  | 0.19328 |
| Dpp6          | -8.65822 | 2.2E-08 | 0.11547 | 0.38019 | 0.12662 | 0.07976 | 0.04109 | 0.03534 |
| Ano7          | -8.69156 | 0.00718 | 0.34885 | 0.23346 | 0.03985 | 0.07302 | 0.05911 | 0.04449 |
| Gm6970        | -8.69185 | 0.00078 | 0.1739  | 1.53618 | 0.95343 | 0.2184  | 0.17679 | 0.26613 |
| Wdr72         | -8.69674 | 2.1E-10 | 0.51056 | 0.77031 | 0.39231 | 0.10686 | 0.13369 | 0.18941 |
| Lypd6b        | -8.70309 | 1.1E-13 | 0.80059 | 1.46442 | 1.1278  | 0.33514 | 0.20347 | 0.34032 |
| Gm21887       | -8.7124  | 0.03794 | 90.3359 | 22.425  | 49.8826 | 20.3135 | 24.9757 | 9.34077 |
| Ttc34         | -8.75673 | 6.9E-10 | 0.72548 | 2.21762 | 1.60382 | 0.35268 | 0.45203 | 0.48348 |
| K230010J24Rik | -8.76673 | 0.00109 | 0.37482 | 0.86    | 1.02748 | 0.06725 | 0.08165 | 0.36874 |
| Bbof1         | -8.79228 | 5.5E-13 | 2.79957 | 6.36988 | 5.25837 | 1.1394  | 1.13315 | 1.46775 |
| Rassf10       | -8.798   | 8.6E-16 | 0.96074 | 1.91551 | 1.24872 | 0.24963 | 0.37047 | 0.40559 |
| D630024D03Rik | -8.85112 | 1.6E-08 | 0.44347 | 1.36516 | 1.01306 | 0.04641 | 0.26299 | 0.39588 |
| Ccdc13        | -8.90857 | 1.2E-07 | 1.21986 | 2.77556 | 2.02032 | 0.21277 | 0.4306  | 0.7519  |
| Cfap73        | -8.95757 | 2.1E-05 | 2.38932 | 4.94834 | 3.01634 | 0.31586 | 0.70313 | 1.34711 |
| Crb1          | -8.97286 | 0.00038 | 0.01059 | 0.04254 | 0.07986 | 0.00665 | 0.02154 | 0       |
| C530043A13Rik | -8.99206 | 0.00757 | 1.54505 | 1.14531 | 0.9774  | 0.11194 | 0.18124 | 0.59111 |
| Odf3b         | -9.08824 | 7.2E-08 | 11.2587 | 19.4253 | 15.1259 | 2.86985 | 2.26646 | 5.11765 |
| 1810020O05Rik | -9.11328 | 2.7E-06 | 0.77434 | 2.48734 | 1.59201 | 0.27785 | 0.05623 | 0.84642 |
| Cfap157       | -9.15293 | 3.2E-08 | 1.95311 | 5.43727 | 4.0155  | 0.57233 | 0.46329 | 1.44463 |
| Dytn          | -9.37752 | 0.00015 | 0.11312 | 0.18169 | 0.07753 | 0       | 0.02875 | 0.05771 |
| Gm5737        | -9.39762 | 2.7E-05 | 0.36421 | 0.7312  | 0.624   | 0.17152 | 0.13885 | 0.06967 |
| Tll13         | -9.39925 | 3.7E-08 | 0.16625 | 0.51177 | 0.30382 | 0.0522  | 0.05634 | 0.12721 |
| Fam92b        | -9.48765 | 1.2E-07 | 1.32839 | 2.73359 | 2.84491 | 0.41707 | 0.37982 | 0.63527 |
| Xlr3a         | -9.49045 | 0.01645 | 0.14316 | 0.13796 | 0.27471 | 0.07192 | 0.05822 | 0.13145 |
| Mypn          | -9.50398 | 0.00417 | 0.33116 | 0.62053 | 0.27234 | 0.08318 | 0.03367 | 0.15204 |
| Alms1-ps1     | -9.57794 | 0.0257  | 0       | 0.17176 | 0.62296 | 0.03358 | 0.1359  | 0       |
| Proc          | -9.60828 | 0.02301 | 0.14792 | 0.17818 | 0.15206 | 0       | 0.03759 | 0.05659 |
| Rhbg          | -9.66743 | 0.00013 | 0.41855 | 0.33612 | 0.61466 | 0.11264 | 0.12157 | 0       |
| Foxn4         | -9.66876 | 0.00041 | 0.13743 | 0.16554 | 0.28255 | 0.02157 | 0.03493 | 0.07887 |
| Nell1         | -9.67264 | 0.00168 | 0.06372 | 0.05117 | 0.03275 | 0.01    | 0.01619 | 0       |
| Cadm2         | -9.72721 | 4.3E-06 | 0.02361 | 0.17068 | 0.10519 | 0.0519  | 0.03601 | 0.0271  |
| Cyp2e1        | -9.79221 | 0.00017 | 0.16101 | 0.77579 | 0.99308 | 0.2022  | 0.16368 | 0.04107 |
| Itпка         | -9.80342 | 1.1E-21 | 1.14672 | 3.47887 | 2.61957 | 0.52004 | 0.51812 | 0.58495 |

|               |          |         |         |         |         |         |         |         |
|---------------|----------|---------|---------|---------|---------|---------|---------|---------|
| Bpifa1        | -9.82778 | 0.00548 | 15.4426 | 70.3133 | 11.0454 | 6.96665 | 4.80116 | 7.39939 |
| Dyx1c1        | -9.92827 | 0.00067 | 0.29321 | 1.50698 | 1.16548 | 0.22094 | 0.23847 | 0.17948 |
| Ptpn20        | -9.92875 | 0.02196 | 0.14993 | 0.2709  | 0.07706 | 0       | 0       | 0.11472 |
| Acsm1         | -9.99151 | 4.3E-09 | 1.4338  | 2.0896  | 2.21997 | 0.40014 | 0.10797 | 0.69076 |
| Sult1d1       | -9.99863 | 1.1E-11 | 1.4601  | 3.93367 | 2.35633 | 0.53236 | 0.45488 | 0.64871 |
| Gm20662       | -10.0483 | 0.0006  | 1.93761 | 2.45948 | 1.54205 | 0.62797 | 0.82604 | 0.86086 |
| Mst1          | -10.0747 | 1.4E-08 | 1.53606 | 1.27465 | 0.52635 | 0.38582 | 0.23424 | 0.27425 |
| Erich5        | -10.1632 | 1.4E-09 | 0.5362  | 1.09606 | 0.76834 | 0.24487 | 0.09911 | 0.18649 |
| Slc27a2       | -10.1707 | 1.7E-09 | 0.27767 | 0.66895 | 0.57088 | 0.13561 | 0.07841 | 0.11803 |
| D430001F17Rik | -10.2004 | 2.2E-05 | 0.81036 | 0.65076 | 0.46992 | 0.03914 | 0.19011 | 0.19079 |
| Gm15997       | -10.2261 | 5.4E-05 | 0.46607 | 0.43666 | 0.26617 | 0.09755 | 0.11845 | 0       |
| Six1          | -10.2308 | 1E-09   | 0.42279 | 1.42176 | 1.34009 | 0.18252 | 0.10745 | 0.34373 |
| Lrrc43        | -10.2575 | 3E-06   | 3.53176 | 6.07752 | 6.64643 | 0.63363 | 0.76937 | 1.6729  |
| Plk5          | -10.2664 | 1.6E-08 | 0.21624 | 1.14611 | 0.59278 | 0.1901  | 0.08793 | 0.13237 |
| Vpreb3        | -10.292  | 4.9E-18 | 2.42694 | 9.74479 | 5.08209 | 1.52395 | 1.23363 | 0.82534 |
| Slc35d3       | -10.3319 | 0.0004  | 0.26423 | 0.45974 | 0.09054 | 0.08296 | 0.02238 | 0.06739 |
| 4932443I19Rik | -10.4839 | 2.2E-10 | 0.72402 | 1.20161 | 0.7112  | 0.13639 | 0.15948 | 0.25853 |
| Tmem232       | -10.531  | 4E-13   | 1.94982 | 3.40997 | 2.13799 | 0.43532 | 0.35239 | 0.76254 |
| Wdr27         | -10.6404 | 3.1E-08 | 0.40496 | 1.33695 | 1.3568  | 0.08476 | 0.11436 | 0.41315 |
| Galnt5        | -10.6459 | 6.6E-10 | 0.1817  | 0.41689 | 0.33798 | 0.0489  | 0.07916 | 0.05958 |
| Tcerg1l       | -10.7986 | 0.01486 | 0.06007 | 0.1206  | 0.04117 | 0       | 0.01527 | 0.02298 |
| Iqch          | -11.1961 | 9.3E-08 | 0.08376 | 0.37666 | 0.30996 | 0.05259 | 0.04257 | 0.08972 |
| Gm20422       | -11.2476 | 0.01657 | 1.36459 | 0.54792 | 0.46759 | 0.10711 | 0.43351 | 0.13052 |
| Flg           | -11.4757 | 0.00361 | 0.24766 | 0.21813 | 0.27923 | 0.0301  | 0.02843 | 0.07947 |
| Lmx1b         | -11.5006 | 0.00019 | 0.11867 | 0.15247 | 0.06506 | 0.02981 | 0.01206 | 0.01816 |
| Wdr95         | -11.5559 | 6E-06   | 1.83206 | 1.89923 | 1.18706 | 0.14641 | 0.18625 | 0.58622 |
| Slc13a2       | -11.6742 | 0.04631 | 0.48018 | 0.30849 | 0       | 0.09046 | 0.09763 | 0.03674 |
| Atp6v1b1      | -11.7031 | 1.6E-12 | 0.42299 | 0.97658 | 0.81529 | 0.1162  | 0.08063 | 0.22251 |
| Ces1f         | -11.7861 | 1.6E-09 | 0.38783 | 0.56626 | 0.55573 | 0.13283 | 0.07169 | 0.08093 |
| Adh7          | -11.8339 | 6E-09   | 1.00925 | 2.13672 | 1.55099 | 0.30727 | 0.18655 | 0.39782 |
| Slc5a9        | -11.8863 | 0.00094 | 0.2681  | 0.2153  | 0.09187 | 0.02806 | 0.03407 | 0.05129 |
| Dcdc2a        | -11.8873 | 1.6E-20 | 0.30758 | 0.98802 | 0.74736 | 0.15802 | 0.07817 | 0.13907 |
| Cfap221       | -12.1326 | 1.4E-17 | 0.9933  | 1.4039  | 1.36146 | 0.24949 | 0.18176 | 0.27361 |
| Cryaa         | -12.1827 | 1.3E-06 | 0.39062 | 1.09791 | 0.60232 | 0.12264 | 0.14892 | 0.07472 |
| Dmrt2         | -12.2024 | 2E-07   | 0.49348 | 0.59443 | 0.30437 | 0.03099 | 0.10033 | 0.11328 |
| Lypd6         | -12.2313 | 0.00033 | 0.09318 | 0.24942 | 0.12771 | 0.0195  | 0.01579 | 0.04753 |
| AF529169      | -12.2514 | 0.03425 | 0.01594 | 0.03839 | 0.02184 | 0       | 0.0081  | 0       |
| Capn13        | -12.2944 | 2.7E-05 | 0.22154 | 0.42697 | 0.33401 | 0.05564 | 0.02252 | 0.10171 |
| Mpz           | -12.3604 | 0.00322 | 0.49378 | 0.39653 | 0.3008  | 0.0689  | 0.02789 | 0.12594 |
| Klkb1_2       | -12.4091 | 0.04163 | 0       | 0.37163 | 0.49013 | 0       | 0       | 0.3541  |
| Cyp4f15       | -12.4532 | 7.5E-19 | 0.60904 | 1.9156  | 1.80867 | 0.35056 | 0.12899 | 0.31068 |
| Tymp          | -12.5198 | 1.3E-07 | 5.17405 | 10.4104 | 8.80623 | 0.89257 | 0.89593 | 2.30579 |
| Adprhl1       | -12.5239 | 0.00382 | 0.09889 | 0.30177 | 0.05422 | 0.02484 | 0.02011 | 0.03027 |
| Gm7269        | -12.7271 | 0.00063 | 0.28341 | 0.60691 | 0.32371 | 0       | 0.09604 | 0.07228 |
| Gp2           | -12.7472 | 6.3E-08 | 1.85496 | 3.67752 | 1.54932 | 0.47319 | 0.47144 | 0.31048 |
| Styxl1        | -12.7542 | 8E-06   | 0.26174 | 0.57802 | 0.40359 | 0.16435 | 0       | 0.05007 |
| Fut9          | -12.828  | 1.1E-05 | 0.18432 | 0.19511 | 0.04593 | 0.03157 | 0.02981 | 0.01923 |
| Lgals12       | -12.9087 | 4.4E-11 | 0.5012  | 0.7379  | 0.62972 | 0.07868 | 0.06369 | 0.19175 |
| Mcidas        | -12.9266 | 0.00011 | 0.34441 | 0.19755 | 0.23603 | 0       | 0.05002 | 0.07529 |
| RP24-170O17.2 | -12.9763 | 0.00197 | 0.05762 | 0.23136 | 0.39489 | 0       | 0.05858 | 0.04409 |
| Atp10b        | -13.0469 | 3.2E-09 | 0.38937 | 0.56851 | 0.29918 | 0.08891 | 0.09596 | 0.14445 |
| Serpina9      | -13.1269 | 5.5E-08 | 0.63048 | 1.13919 | 0.45368 | 0.07918 | 0.09614 | 0.14473 |
| 1700019D03Rik | -13.1703 | 0.00288 | 0.0535  | 0.15036 | 0.09165 | 0.11757 | 0.10877 | 0.08187 |
| Kcnk12        | -13.2298 | 6.8E-15 | 1.91437 | 3.55508 | 2.7059  | 0.71374 | 0.3649  | 0.32043 |
| Ccdc129       | -13.2603 | 5.1E-16 | 0.90358 | 2.07319 | 1.23847 | 0.18237 | 0.21324 | 0.29631 |
| 4930444P10Rik | -13.2879 | 8.1E-07 | 1.01054 | 0.99185 | 0.50017 | 0.07051 | 0.22829 | 0.12887 |

|               |          |         |         |         |         |         |         |         |
|---------------|----------|---------|---------|---------|---------|---------|---------|---------|
| Iqcd          | -13.3868 | 5.8E-06 | 1.7235  | 3.10029 | 2.92924 | 0.43289 | 0.49059 | 0.633   |
| Olig3         | -13.9865 | 2.6E-07 | 0.39128 | 0.58355 | 0.42138 | 0.0351  | 0.05683 | 0.12831 |
| Tacr1         | -14.0202 | 4.2E-06 | 0.71372 | 0.48718 | 0.35462 | 0.07843 | 0.05442 | 0.13653 |
| Pax9          | -14.1928 | 3.7E-06 | 0.45815 | 0.49668 | 0.14129 | 0.07192 | 0.02329 | 0.08764 |
| Gm12996       | -14.2076 | 0.02091 | 0.18211 | 0.43872 | 0.3744  | 0       | 0.09256 | 0       |
| Slc5a8        | -14.4349 | 0.00224 | 0.34826 | 0.80406 | 0.13425 | 0.01367 | 0.08851 | 0.08327 |
| Fer1l4        | -14.4614 | 2.8E-11 | 0.45347 | 0.68785 | 0.37983 | 0.09492 | 0.11952 | 0.0257  |
| Klhl34        | -14.487  | 1E-05   | 0.05985 | 0.38453 | 0.57427 | 0.07517 | 0.03042 | 0.0458  |
| Acnat1        | -14.4996 | 3.7E-05 | 0.32656 | 0.56819 | 0.2238  | 0.03418 | 0.05533 | 0.08329 |
| Dthd1         | -14.5795 | 0.00027 | 0.62037 | 0.53651 | 0.13082 | 0.0899  | 0.04851 | 0.07303 |
| Bcl2l10       | -14.6227 | 0.01389 | 0.2848  | 0.07624 | 0.19518 | 0       | 0.04826 | 0       |
| Ccdc110       | -15.0115 | 0.00028 | 0.17443 | 0.28015 | 0.17931 | 0       | 0       | 0.1001  |
| Fmo6          | -15.1841 | 0.00156 | 0.05918 | 0.28516 | 0.24335 | 0       | 0.03008 | 0.04528 |
| Olf1r315      | -15.4018 | 0.00206 | 0.13988 | 0.22466 | 0.12781 | 0       | 0       | 0.07135 |
| Lars2         | -15.6447 | 0.00754 | 90.2526 | 43.1894 | 40.5585 | 7.97127 | 6.56549 | 9.92849 |
| Krt79         | -15.9843 | 4E-12   | 0.77323 | 0.57659 | 0.83272 | 0.27745 | 0.02807 | 0       |
| Prickle4      | -16.2306 | 0.0105  | 0.35419 | 0.71108 | 0.44501 | 0.03707 | 0.30006 | 0.13551 |
| BC048546      | -16.2353 | 2.5E-09 | 6.61642 | 5.9967  | 1.21013 | 0.73474 | 0.72454 | 0.73254 |
| Hhatl         | -16.3796 | 1.4E-13 | 0.44122 | 1.16925 | 0.93736 | 0.08312 | 0.06728 | 0.20256 |
| Ppp1r1b       | -16.5959 | 1.9E-08 | 0.94934 | 1.01649 | 0.67771 | 0.19871 | 0.18096 | 0.06053 |
| Dio1          | -16.9944 | 1.6E-05 | 0.47033 | 0.33049 | 0.12087 | 0.03692 | 0.05977 | 0       |
| Slc38a3       | -17.1084 | 0.02072 | 0.08779 | 0.05288 | 0       | 0.01378 | 0       | 0       |
| Aspg          | -17.4173 | 2.6E-06 | 0.08479 | 0.68088 | 1.01686 | 0.10648 | 0.06465 | 0.03244 |
| Foxa3         | -17.4888 | 7.7E-05 | 0.45486 | 0.41094 | 0.23379 | 0.07141 | 0.0578  | 0       |
| D930020B18Rik | -17.5082 | 5.6E-12 | 0.40107 | 0.60837 | 1.03835 | 0.08395 | 0.02265 | 0.17049 |
| Reg3g         | -17.5717 | 2.6E-06 | 18.9562 | 14.3429 | 3.90482 | 1.68571 | 1.64305 | 2.09604 |
| Oit1          | -17.822  | 2.3E-06 | 1.38872 | 1.33825 | 0.44413 | 0       | 0.18824 | 0.21252 |
| Cyp2a5        | -17.8414 | 2.2E-07 | 12.4591 | 24.3177 | 5.70505 | 1.8243  | 1.47675 | 1.75275 |
| Kcna1         | -17.8576 | 4.8E-06 | 0.14538 | 0.11675 | 0.14945 | 0       | 0.01232 | 0.03708 |
| Uox           | -17.8894 | 0.00039 | 0.07209 | 0.28948 | 0.07411 | 0.04527 | 0       | 0       |
| Pigr          | -18.5531 | 3.4E-20 | 16.4017 | 15.5284 | 13.1532 | 2.22244 | 1.56503 | 1.98158 |
| Chst13        | -18.8524 | 0.02503 | 0.2102  | 0.28133 | 0.04802 | 0       | 0       | 0.05361 |
| Ccr3          | -19.8882 | 0.0002  | 0.17699 | 0.2274  | 0.07277 | 0.02223 | 0       | 0.02708 |
| Gcnt3         | -20.1076 | 0.01728 | 0.21543 | 0.06487 | 0       | 0.01691 | 0.01369 | 0       |
| Pck1          | -20.9208 | 0.00032 | 0.33776 | 0.46111 | 0.34721 | 0.02121 | 0.06867 | 0.02584 |
| Alox15        | -21.6143 | 3.4E-05 | 1.32149 | 0.79592 | 0.32344 | 0       | 0.09596 | 0.18056 |
| Gm45218       | -21.6444 | 0.00307 | 0       | 0.27714 | 0.28381 | 0       | 0.03508 | 0       |
| 4930404N11Rik | -22.0444 | 0.00084 | 0.5953  | 1.64664 | 1.3599  | 0.62301 | 1.47935 | 0.91101 |
| Otx1          | -22.2726 | 1.6E-07 | 0.3845  | 0.70331 | 0.19031 | 0       | 0.04343 | 0.08172 |
| Cfd           | -22.376  | 4.7E-05 | 2.0077  | 4.43378 | 5.33166 | 0.15759 | 0.19135 | 0.6721  |
| Susd5         | -22.4624 | 0.00078 | 0.02837 | 0.27335 | 0.13608 | 0.03562 | 0       | 0       |
| Spdef         | -22.9266 | 3.7E-08 | 1.37628 | 1.06271 | 0.6167  | 0.19943 | 0.05381 | 0.08101 |
| Scgb3a1       | -23.0911 | 5E-13   | 103.036 | 269.694 | 97.2916 | 18.1207 | 12.6997 | 13.1893 |
| E030044B06Rik | -24.7013 | 7.2E-06 | 0.27445 | 1.02853 | 0.25078 | 0.05745 | 0       | 0.07    |
| Cyp4a12b      | -25.3216 | 2.4E-06 | 0.67702 | 1.1262  | 0.36455 | 0.06073 | 0       | 0.074   |
| Lypd2         | -26.6432 | 3.3E-30 | 11.2578 | 18.2182 | 16.8331 | 1.49951 | 1.12714 | 1.30516 |
| Chad          | -27.5869 | 4.5E-20 | 6.96294 | 13.5084 | 6.23645 | 0.69263 | 0.98119 | 0.94951 |
| Tbata         | -29.1358 | 3.6E-06 | 0.57289 | 1.45685 | 0.29446 | 0       | 0.02427 | 0.14612 |
| Sost          | -31.1843 | 0.01353 | 0.22424 | 0.31513 | 0.07684 | 0       | 0.0285  | 0       |
| Pla2g2c       | -31.5993 | 2.6E-05 | 0.19239 | 0.12875 | 0.13185 | 0       | 0.0163  | 0       |
| Asgr1         | -31.6556 | 2E-05   | 0.0728  | 0.40921 | 0.39911 | 0       | 0.037   | 0       |
| Bpifb1        | -31.9186 | 3.8E-10 | 21.2298 | 48.4972 | 15.9755 | 2.71442 | 1.33466 | 1.86209 |
| Cdc20b        | -34.9678 | 0.00022 | 0.69694 | 0.20352 | 0.52105 | 0       | 0       | 0.09696 |
| Sox21         | -35.9768 | 3.1E-08 | 0.76217 | 1.32205 | 0.33429 | 0.07657 | 0.0155  | 0.11664 |
| Itln1         | -36.3561 | 0.02953 | 1.01507 | 0.16303 | 0       | 0       | 0       | 0.07767 |
| Car3          | -37.283  | 0.00014 | 0.80851 | 1.36348 | 1.44063 | 0.07615 | 0       | 0.12373 |



|          |          |         |         |         |         |         |         |         |
|----------|----------|---------|---------|---------|---------|---------|---------|---------|
| Gmnc     | -38.6286 | 2E-10   | 0.14183 | 0.22779 | 0.34992 | 0       | 0.01442 | 0.0217  |
| BC027072 | -39.0055 | 0.03432 | 0.02315 | 0.05576 | 0.03172 | 0       | 0       | 0       |
| Muc5b    | -39.9879 | 0       | 35.1931 | 37.8648 | 29.9319 | 2.4835  | 1.74285 | 1.90104 |
| Plin1    | -40.3585 | 0.00038 | 0.1993  | 0.22007 | 0.17073 | 0       | 0.02533 | 0       |
| Gm45572  | -41.7454 | 0.0331  | 0.46328 | 0.37203 | 0       | 0       | 0       | 0       |
| Gm15319  | -44.5685 | 0.0364  | 0       | 0.47943 | 0.40914 | 0.08651 | 0.11672 | 0.03514 |
| Gm8941   | -45.2218 | 0.02075 | 0.12883 | 0.31037 | 0.26487 | 0       | 0       | 0       |
| Ern2     | -46.4753 | 3.1E-06 | 1.05503 | 0.56483 | 0.29457 | 0.02454 | 0.01986 | 0.0598  |
| Gm14280  | -52.845  | 0.00488 | 0.24062 | 0.12882 | 0.1649  | 0       | 0       | 0       |
| Muc5ac   | -54.4799 | 1.1E-07 | 6.92631 | 1.90308 | 1.70528 | 0.15557 | 0.16426 | 0.22254 |
| Gm44963  | -57.0071 | 0.01082 | 0.15546 | 0.37453 | 0.5327  | 0       | 0       | 0       |
| Gm15751  | -61.1736 | 1.6E-07 | 0.49761 | 1.19882 | 0.80993 | 0.78116 | 0.85367 | 0.23797 |
| Fer1l6   | -65.6376 | 1.6E-05 | 4.38655 | 1.3282  | 0.94621 | 0.07225 | 0.0731  | 0.13206 |
| Pdzrn4   | -66.8454 | 0.00127 | 0.11086 | 0.06677 | 0.05698 | 0       | 0       | 0       |
| Tff2     | -77.4136 | 1.5E-13 | 14.4774 | 17.9965 | 9.78571 | 0.37359 | 0.30242 | 0.60699 |
| Chil4    | -79.4234 | 0.00681 | 4.66588 | 1.38999 | 0       | 0       | 0.15301 | 0.05758 |
| Cyp2g1   | -81.1367 | 0.00033 | 0.05399 | 0.08672 | 0.37004 | 0       | 0       | 0       |
| Fcgbp    | -93.445  | 1.6E-08 | 15.0718 | 6.91119 | 2.17015 | 0.23556 | 0.18508 | 0.28704 |
| Capn9    | -98.1402 | 0.00184 | 1.1035  | 0.03853 | 0.03288 | 0.03013 | 0       | 0       |
| Clca1    | -308.366 | 1.9E-07 | 86.0748 | 31.3476 | 15.3618 | 0.40436 | 0.48319 | 0.37541 |
